# Supplementary material for: Partial differentiation induction of leukemia cells co-opts NK cells to erode leukemic stemness
Source: Research Square preprint supplement (doi:10.21203/rs.3.rs-8399393/v1), 2026-01-16
Supplement: Supplementary file 1 [file 1b7b24cc8fdd1476d79d51eb.pdf]

Supplementary Fig.1

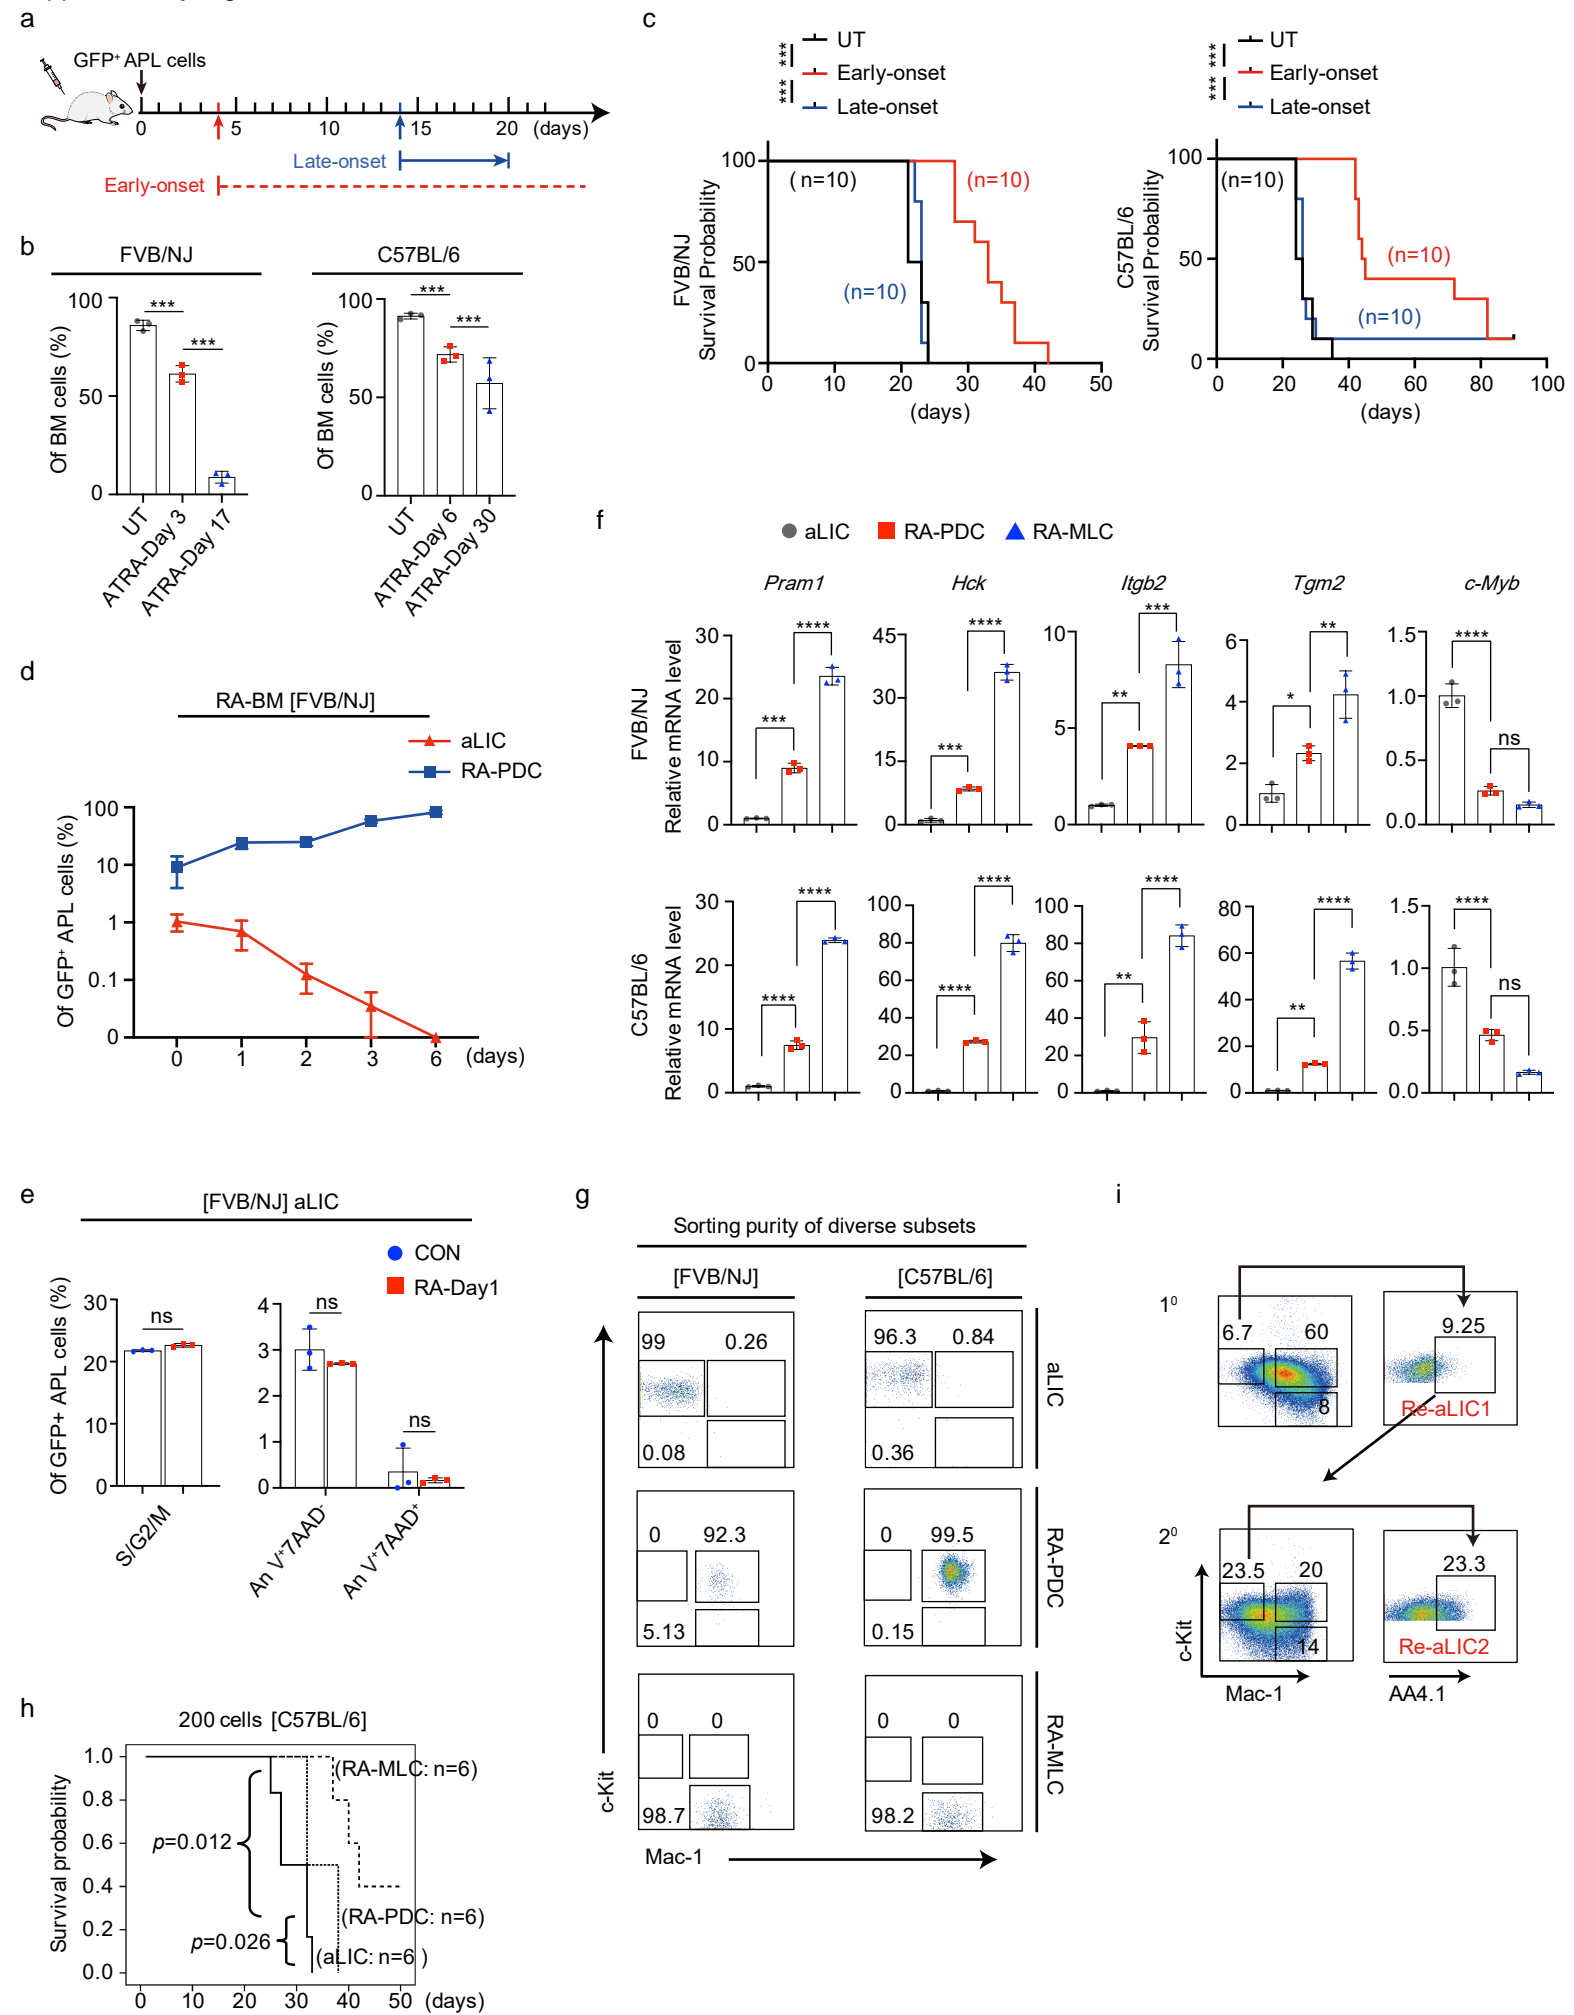

**Supplementary Fig.1 ATRA-induced partially differentiated APL cells possess de-differentiation potential, related to Fig.1.**

**(a)** Schematic diagram of the experimental plan. Intraperitoneal injection of ATRA (10 mg/kg) was started on day 4 (when GFP<sup>+</sup> leukemia cells in PBL were undetectable, early-onset) or day 14 (when GFP<sup>+</sup> leukemia cells were approximately 1% of PBL, late-onset) after the inoculation of 5,000 APL cells into FVB/NJ or C57BL/6 recipients. UT: untreated.

**(b)** After ATRA treatment for the indicated periods, the percentages of GFP<sup>+</sup> APL cells within the BM were measured by flow cytometry. UT: untreated.

**(c)** Survival curves of the FVB/NJ or C57BL/6 leukemic recipients treated with an early-onset or late-onset ATRA regimen (n=10). UT: untreated.

**(d)** The dynamic frequency alterations of aLICs and RA-PDCs/PDCs within the BM GFP<sup>+</sup> leukemic population after treatment with ATRA for 1, 2, 3, and 6 days.

**(e)** At the overt leukemic phase (FVB/NJ model), the recipients were treated with or without ATRA for 1 day, and the gated c-Kit<sup>+</sup>Mac-1<sup>-</sup>AA4.1<sup>+</sup> cells from BM GFP<sup>+</sup> APL section were analyzed. Annexin V and 7-AAD staining for cell survival, and Hoechst 33342 and Ki67 staining for cell cycle status.

**(f)** Real-time PCR assay for the expression levels of PML/RAR $\alpha$ -regulated genes and LSC signature gene as indicated in aLICs, RA-PDCs and RA-MLCs isolated from FVB/NJ and C57BL/6 models, respectively.

**(g)** A representative flow cytometric analysis of the sorting purity of the indicated leukemic subsets.

**(h)** The survival curves of different groups of C57BL/6 recipients that received 200 aLICs, RA-PDCs or RA-MLCs were isolated from the C57BL/6 models that had been treated with ATRA for 6 days.

**(i)** Relative distribution of aLICs, PDCs and MLCs within the BM of syngeneic recipients (1<sup>0</sup>) inoculated with 1-5 RA-PDCs. The regenerated aLICs initiated full-scale leukemia in the secondary recipients (2<sup>0</sup>).

Data are presented as mean  $\pm$  SD. \* $p$ <0.05, \*\* $p$ <0.01, \*\*\* $p$ <0.001. ns: not significant.



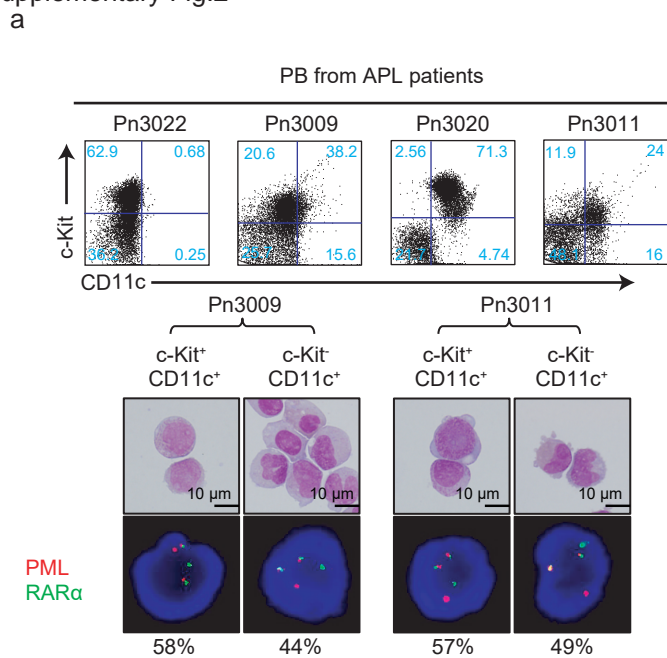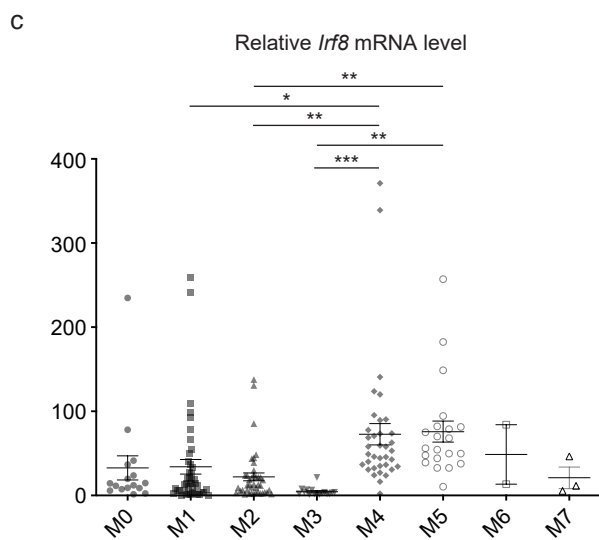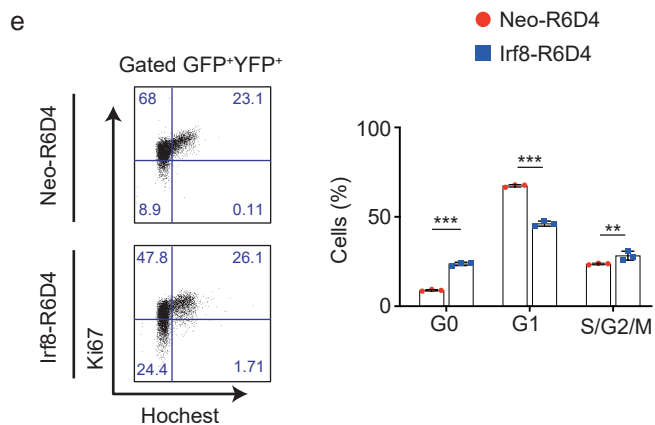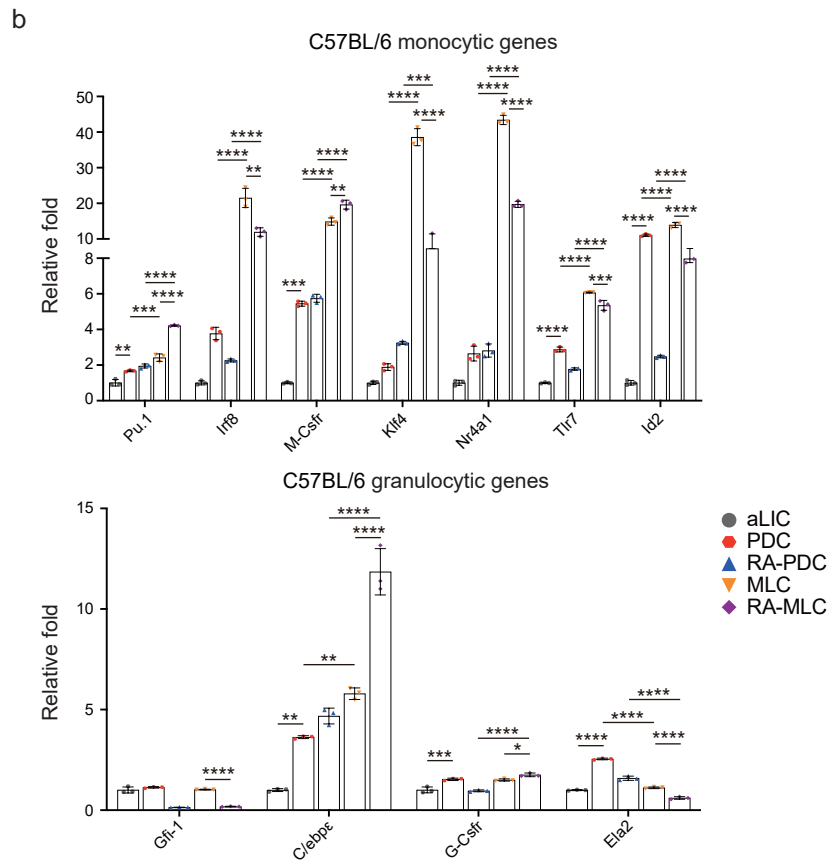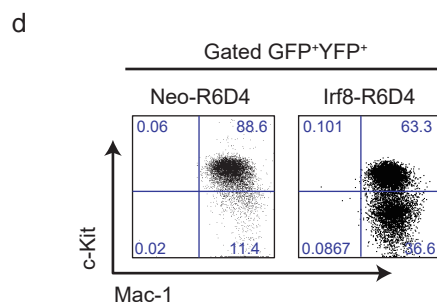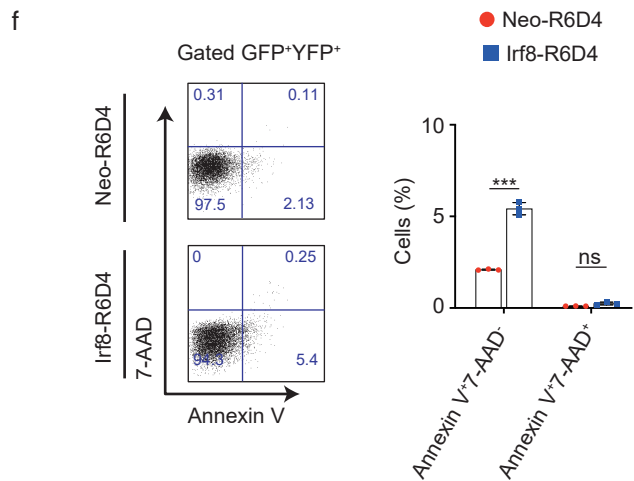

**Supplementary Fig.2 Human and mouse APL cells harbor spontaneous monocytic differentiation potential, related to Fig.2.**

**(a)** FACS-sorted c-Kit<sup>-</sup>CD11c<sup>+</sup> or c-Kit<sup>+</sup>CD11c<sup>+</sup> PBMCs from APL patients were tested for fluorescence in situ hybridization (FISH) of t (15;17). Pn: patient number.

**(b)** RT-PCR assay for mRNA levels of representative monocytic (upper) and granulocytic (bottom) genes in the cellular subsets as indicated from the C57BL/6 models.

**(c)** Expression profile of *irf8* mRNA across eight human AML subtypes using raw data from the TCGA-LAML dataset. M0, n=16; M1, n=42; M2, n=41; M3, n=16; M4, n=36; M5, n=21; M6, n=2; M7, n=3. Pairwise comparisons were performed between M3 and each one of the other subtypes.

**(d-f)** FVB/NJ mice intravenously implanted with  $2 \times 10^5$  Neo- or Irf8-GFP<sup>+</sup>YFP<sup>+</sup> leukemia cells were treated with the R6D4 regimen. Flow cytometric analysis showed the percentages of aLICs, PDCs, and MLCs among GFP<sup>+</sup>YFP<sup>+</sup> cellular sections **(d)**, their cell-cycle status **(e)** and Annexin V and 7-AAD staining for cell survival **(f)**.

Data are presented as mean  $\pm$  SD. \* $p < 0.05$ , \*\* $p < 0.01$ , \*\*\* $p < 0.001$ . ns: not significant.

Supplementary Fig.3

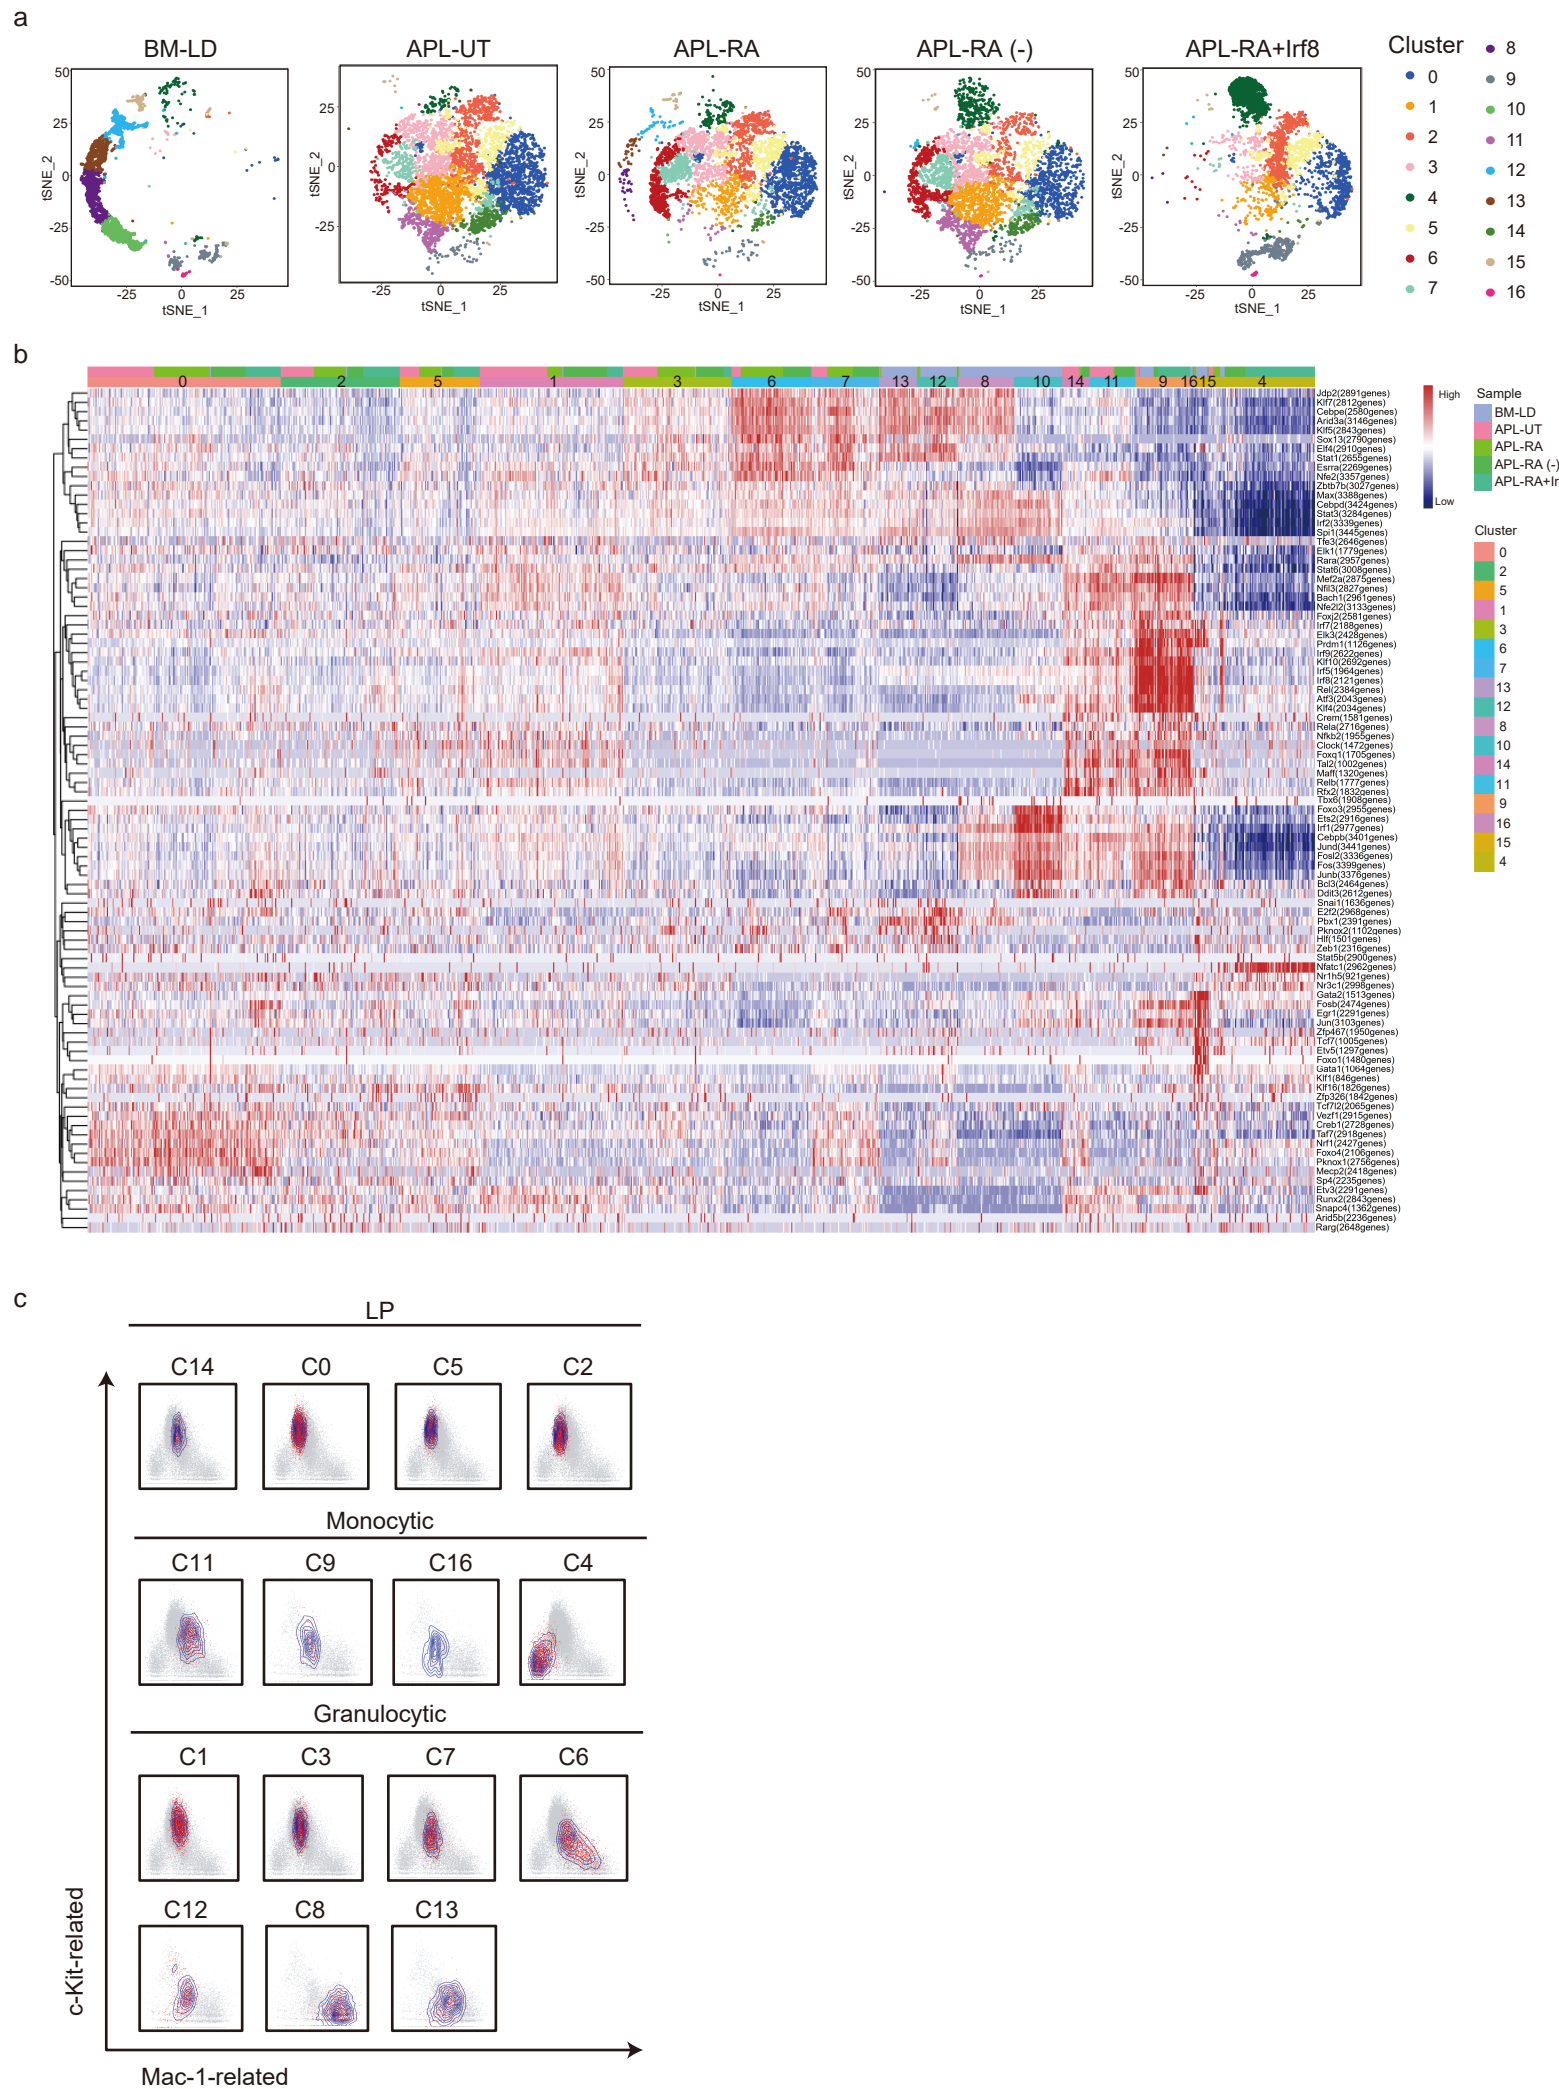

**Supplementary Fig.3 Characterization of the APL hierarchy with scRNA-seq analysis, related to Fig.3.**

**(a)** The t-Stochastic Neighbor Embedding (t-SNE) plot of specific combinations of cellular clusters for each of the 5 samples.

**(b)** Heatmap showing the differential expression patterns of cluster-discriminating marker genes.

**(c)** The contour lines are obtained by averaging the normalized expression levels of the c-Kit-related stemness module and Mac-1-related differentiation module in each cluster.

Data are presented as mean  $\pm$  SD. \* $p < 0.05$ , \*\* $p < 0.01$ , \*\*\* $p < 0.001$ . ns: not significant.

Supplementary Fig.4

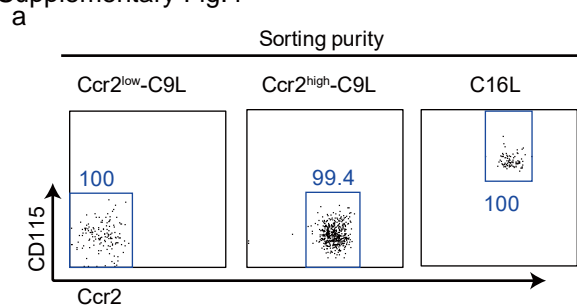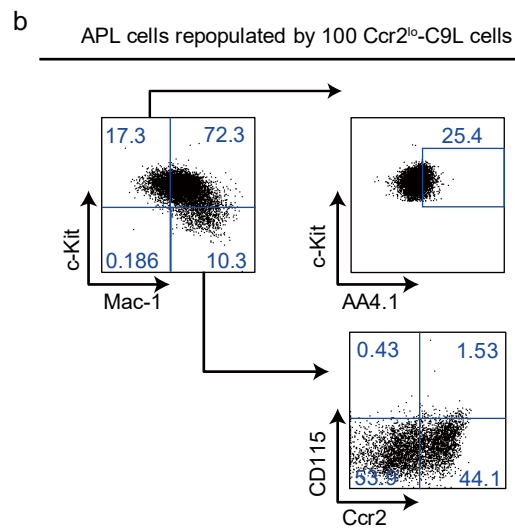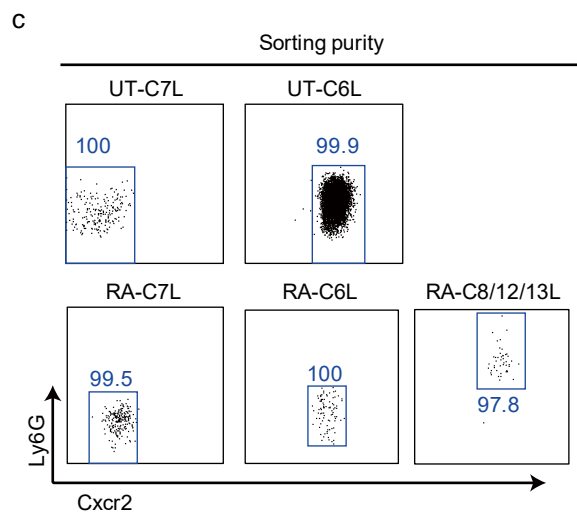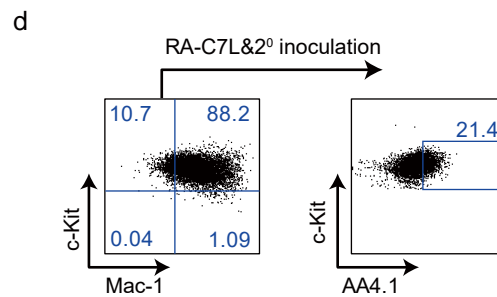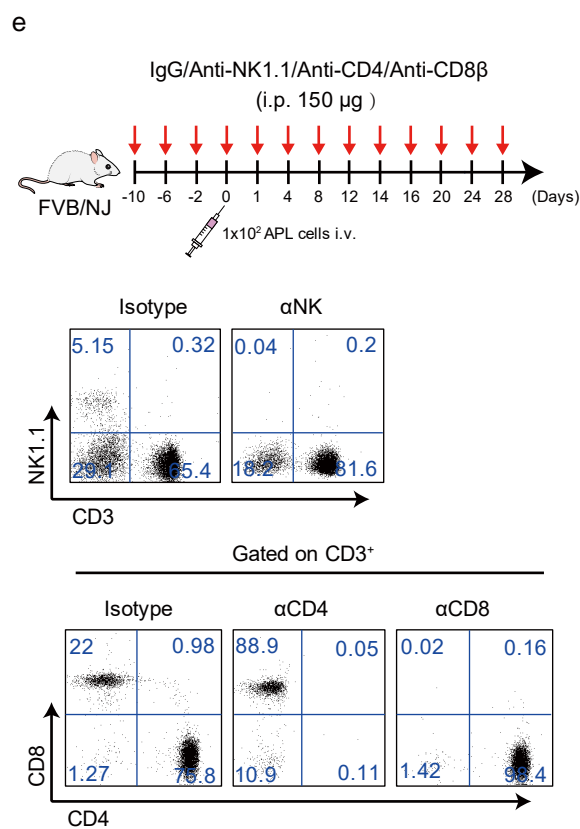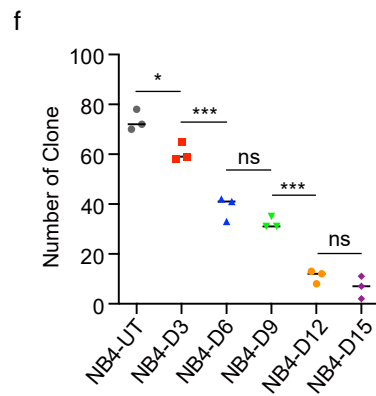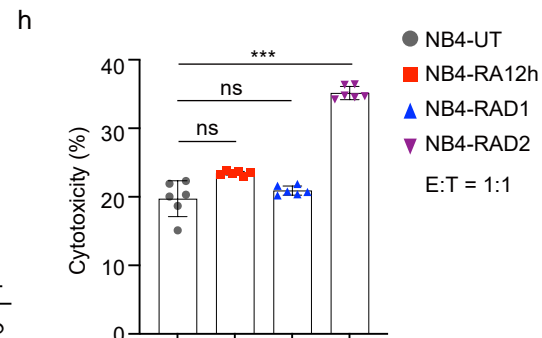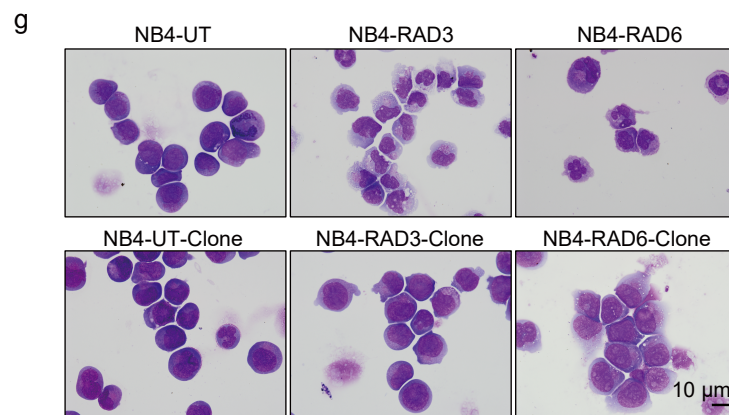

**Supplementary Fig.4 ATRA sensitizes late granulocytic LICs to NK cells-mediated immune rejection, related to Fig.4.**

- (a) Flow cytometric examination of the sorting purity of RA/Irf8-induced CCR2<sup>lo</sup>-C9L, CCR2<sup>hi</sup>-C9, and C16L cells.
- (b) Flow cytometry analysis of leukemic hierarchy re-established by inoculation of 100 RA/Irf8-induced Ccr2<sup>lo</sup>-C9L cells.
- (c) Flow cytometric examination of the sorting purity of UT-C7L, UT-C6L, RA-C7L, RA-C6L, and RA-C8/12/13L cells.
- (d) Flow cytometry analysis of leukemic hierarchy re-established by inoculation of 100 RA-C7L cells into FVB/NJ recipients.
- (e) Overview of the immune cell depletion study. Anti-NK1.1, anti-CD4, anti-CD8 (150 µg/each mouse, 3 times/week, i.p.) or antibody isotype IgG control were injected into 6-8-weeks-old FVB/NJ mice (n=5 for each group) at indicated time points (left panel). Representative flow cytometric analyses of indicated NK, CD4<sup>+</sup> or CD8<sup>+</sup> T cells in peripheral blood on day 0 are shown in the right panel.
- (f,g) Human APL NB4 cells were treated with ATRA for the indicated times, and the retrieved cells were inoculated into 96-well plates with fresh conditioned medium (CM) at density of 1 cell/well. The clone-forming number was counted (f), and the Wright-Giemsa staining of UT-NB4, NB4-RAD3, and NB4-RAD6 cells (upper panel) and corresponding reformed clonal cells (bottom panel) are shown on (g).
- (h) NB4 cells with or without RA treatment were tested for their susceptibility to NK92 cell-mediated killing (E:T=1:1), and apoptosis analysis was conducted 24 hours later.

Data are presented as mean ± SD. \* $p < 0.05$ , \*\* $p < 0.01$ , \*\*\* $p < 0.001$ . ns: not significant.

Supplementary Fig.5

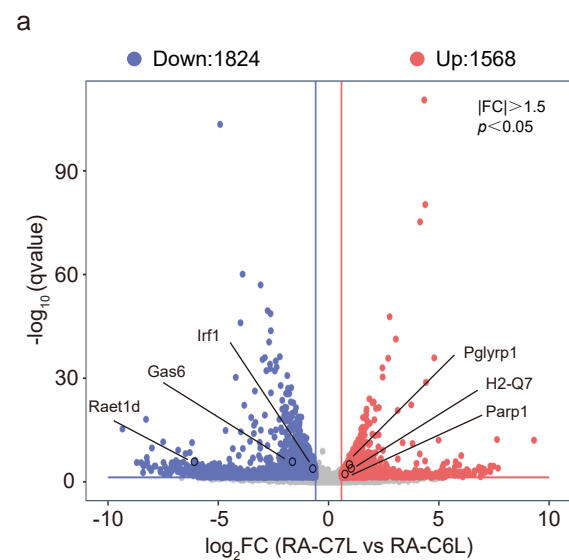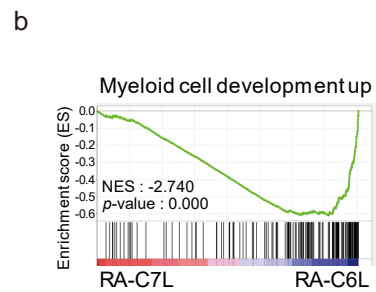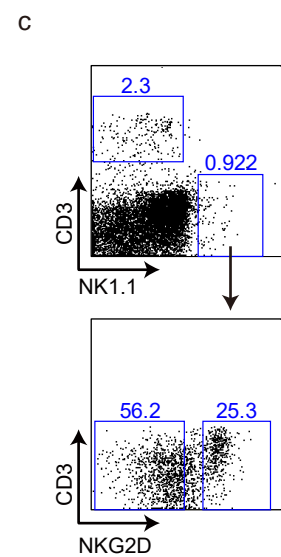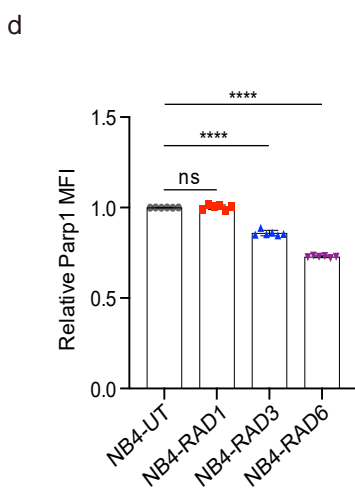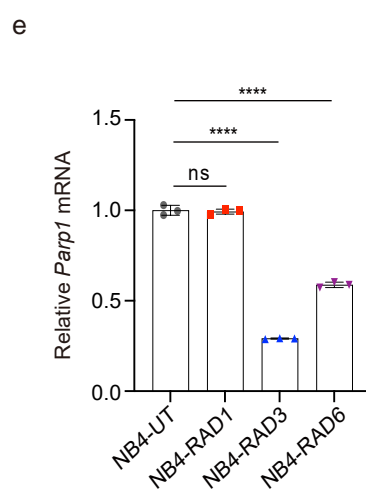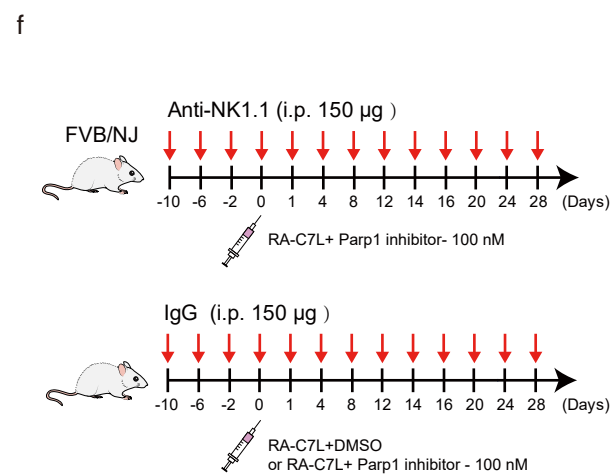

**Supplementary Fig.5 ATRA upregulates the expression of Raet-1 during RA-C7L to RA-C6L differentiation, related to Fig.5.**

- (a) Volcano plot showing the enrichment profile of differentially expressed genes between RA-C7L and RA-C6L cells.
- (b) GSEA of the myeloid cell differentiation-associated signature between RA-C7L and RA-C6L cells.
- (c) Flow cytometry-defined expression of Parp1 on NB4 cells that were treated with ATRA for the indicated times.
- (d) Real-time PCR assay for the expression levels of Parp1 in the NB4 cells that were treated with ATRA for the indicated times.
- (e) Overview of the study (**Fig 5f**). Anti-NK1.1 (150 µg/each mouse, 3 times/week, i.p.) or isotype IgG control were injected into FVB/NJ mice (n=10 for each group) at indicated time points. RA-C7L cells were treated with 10nM Talazoparib or DMSO for 24 hours *in vitro* before inoculation.



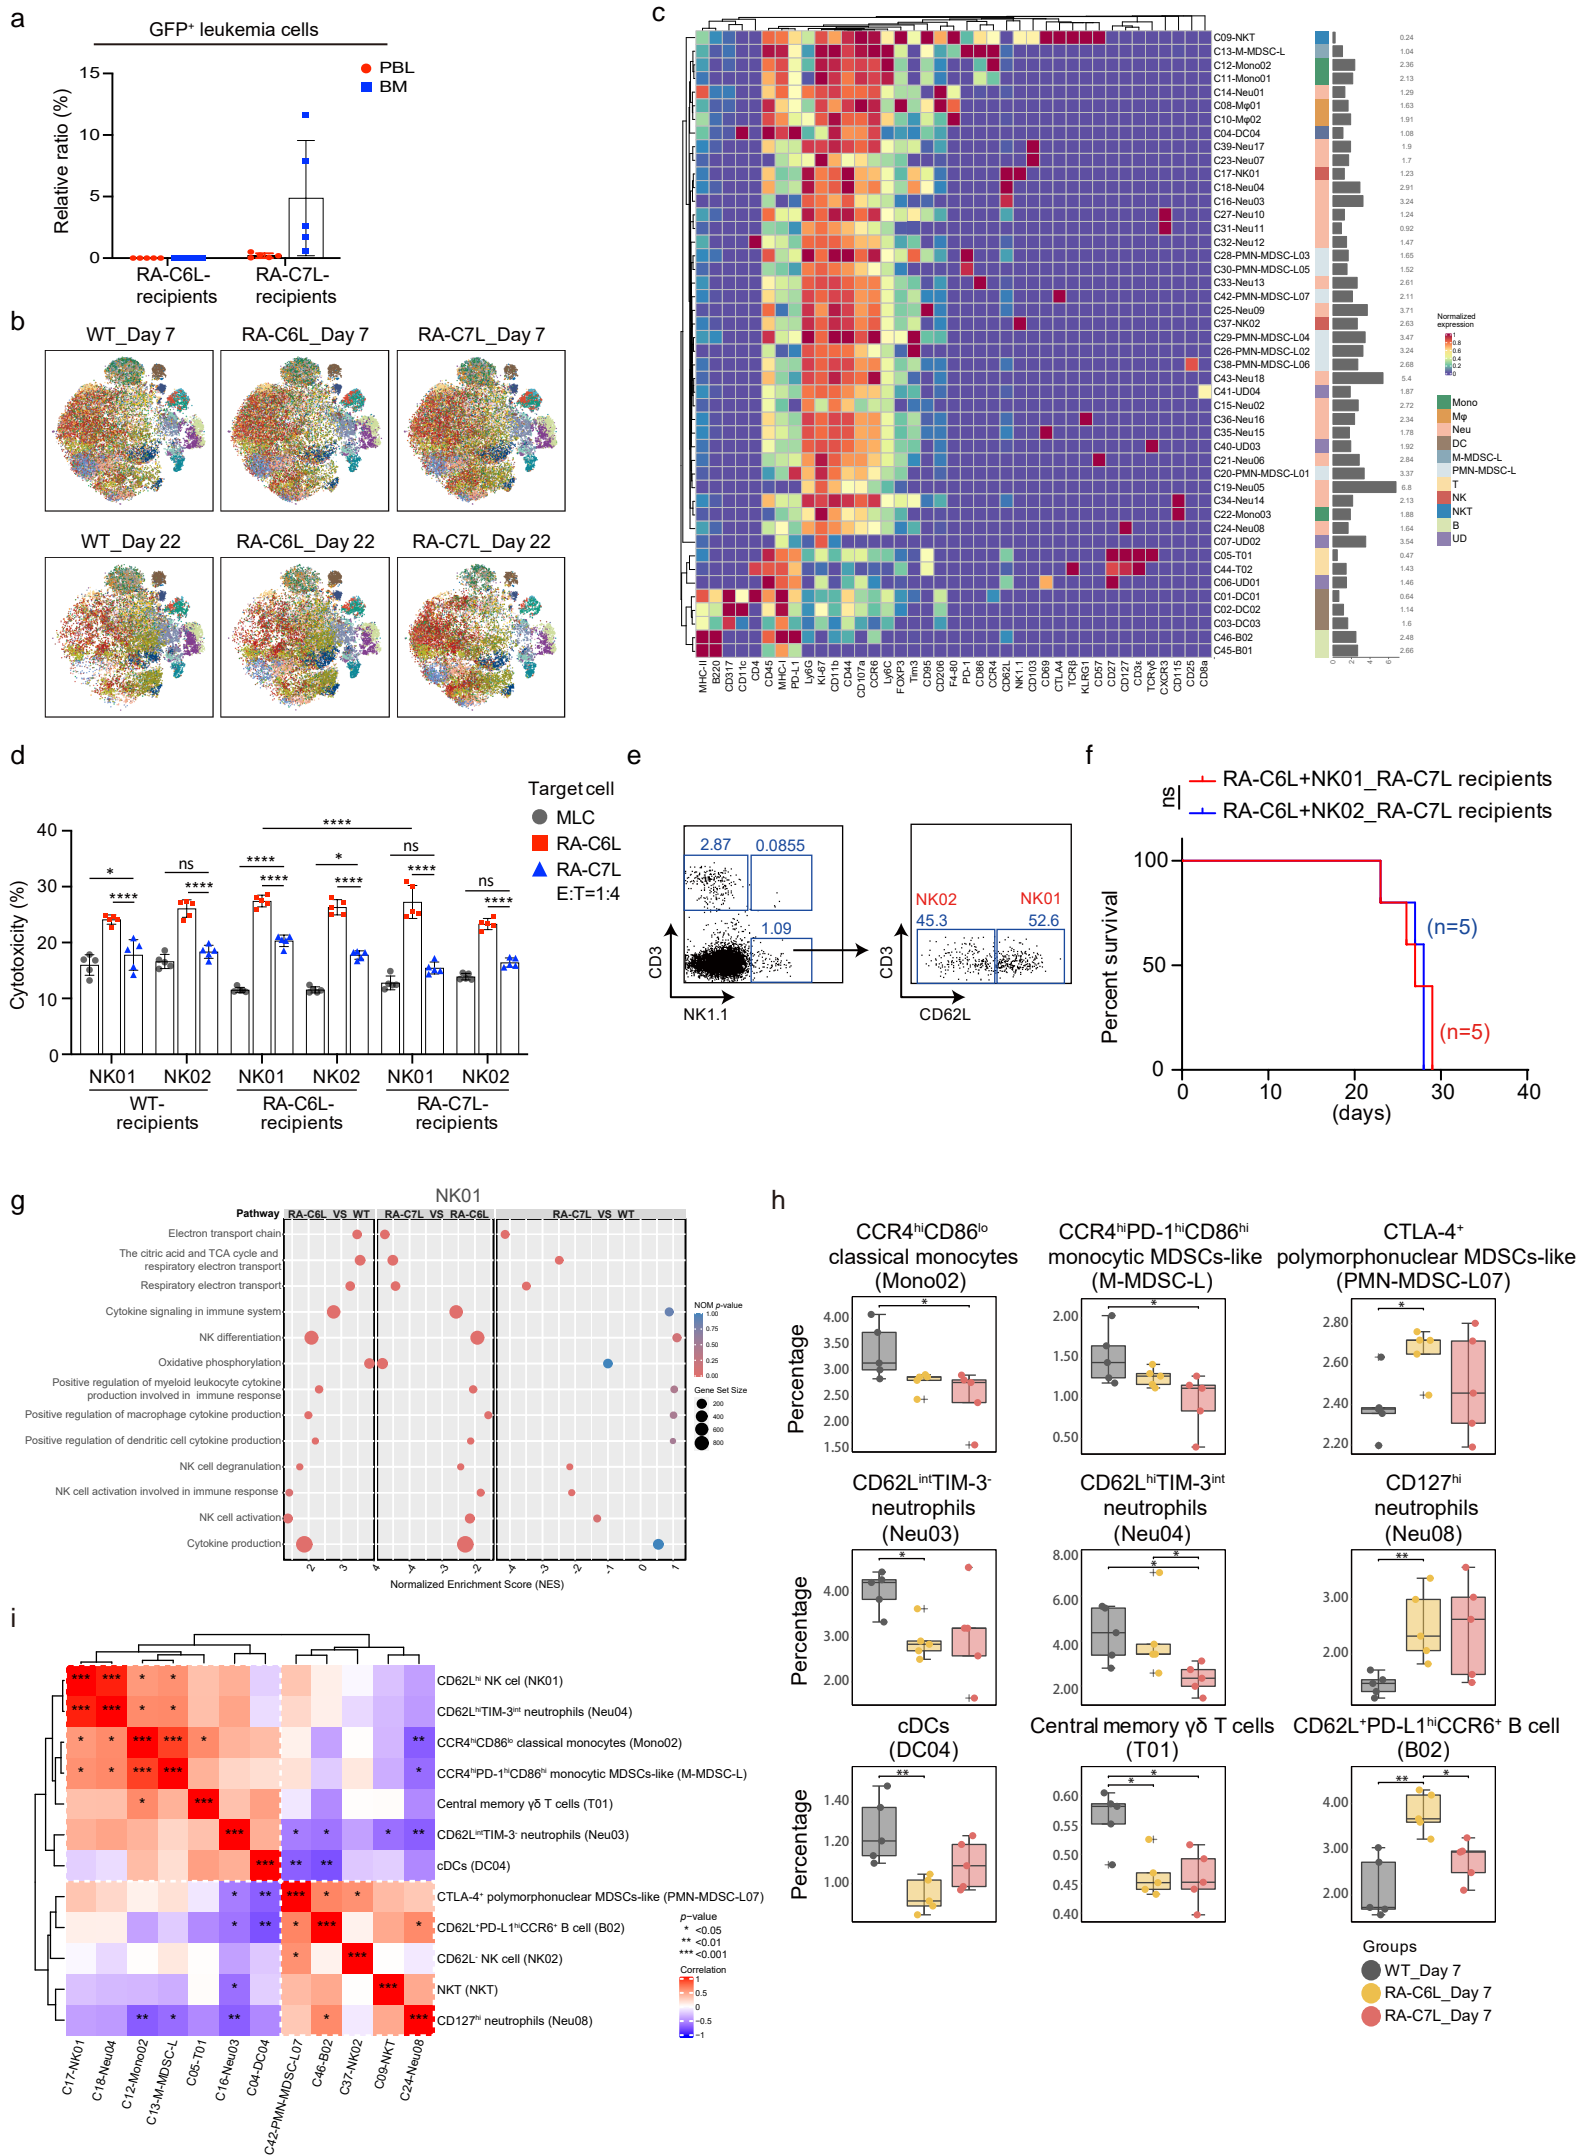

**Supplementary Fig.6 Characterization of immune subsets responding to the inoculation of granulocytic LICs, related to Fig.6.**

(a) 100 RA-C6L or RA-C7L cells as indicated were i.v. injected into unirradiated syngeneic mice on the day 0, and GFP<sup>+</sup> BM leukemic cells in the PBL and BM were analyzed using flow cytometry on the day 7 and day 22, respectively (n=5 for each group).

(b) t-SNE map displaying the compositions of immune cell subsets from different non-malignant bone marrow nucleated cells (BMMCs) samples as indicated.

(c) Heatmap showing normalized expression of 39 surface markers for 46 clusters identified with FlowSom. Relative frequencies are displayed as a bar graph to the right.

(d) Flow cytometric analysis of the *in vitro* cytotoxicity of the RA-PDC, RA-C6L, and RA-C7L cells towards NK01 and NK02 cells taken from the BM of three groups of mice (as shown in **Fig 6a**) on the day 7 (n=6 for each group).

(e) Flow cytometric detection of the relative distribution of NK01 and NK02.

(f) The survival curves of the FVB/NJ recipients intravenously implanted with 1000 RA-C6L cells and 5000 NK01 or NK02 cells. NK01 and NK02 cells were isolated from RA-C7L cells-inoculated recipients on the day 7 (n=5 for each group).

(g) GSEA of the enrichment profile of differentially expressed genes of the NK01 subsets taken from the WT mice or RA-C6L cell and RA-C7L cell-inoculated recipients.

(h) Boxplots showing the frequencies of the indicated immune subtypes across three groups of mice (n=5 for each group).

(i) Heatmap showing Spearman correlations of NK01 and NK02 with other immune subsets as indicated based on their frequency variations among individual mice of three groups (n=15) on the day 7.

Data are presented as mean  $\pm$  SD. \* $p < 0.05$ , \*\* $p < 0.01$ , \*\*\* $p < 0.001$ . ns: not significant.
