# Supplementary material for: Partial differentiation induction of leukemia cells co-opts NK cells to erode leukemic stemness
Source: Research Square preprint supplement (doi:10.21203/rs.3.rs-8399393/v1), 2026-01-16
Supplement: Supplementary file 1 [file 2a464a42c9087d7822e3dc32.xlsx]

## Sheet: Cell subsets
Table S3: APL subsets and NK subsets
Cluster	Markers	Description
aLICs	c-Kit+Mac-1-AA4.1+	apical LICs
PDCs/RA-PDCs	c-Kit+Mac-1++	partially differentiated LICs
MLCs/ RA-MLCs	c-Kitlo/-Mac-1++	more mature LICs
UT-C6L/RA-C7L	c-Kitlo/-Mac-1++Ccr2-Ly6G/Gr-1- Cxcr2-	granulocytic-like MLCs
UT-C7L/RAC6L	c-Kitlo/-Mac-1++Ccr2- Ly6G/Gr-1- Cxcr2+	granulocytic-like MLCs
UT-C8_12_13L/RA-C8_12_13L	c-Kitlo/-Mac-1++Ccr2- Ly6G/Gr-1+Cxcr2+	granulocytic-like MLCs
Ccr2lo-C9L	c-Kit-Mac-1++ Cxcr2-CD115-Ccr2-	monocytic-like MLCs
Ccr2hi-C9L	c-Kit-Mac-1++ Cxcr2-CD115-Ccr2+	monocytic-like MLCs
C16L	c-Kit-Mac-1++ Cxcr2-CD115+Ccr2+	monocytic-like MLCs
WT-NK	CD3-NK1.1+	NK cells
WT-NKG2D cells	CD3-NK1.1+NKG2D+	NK cells
NK01	CD3-NK1.1+CD62L+	NK cells
NK02	CD3-NK1.1+CD62L-	NK cells
