# Supplementary material for: Partial differentiation induction of leukemia cells co-opts NK cells to erode leukemic stemness
Source: Research Square preprint supplement (doi:10.21203/rs.3.rs-8399393/v1), 2026-01-16
Supplement: Supplementary file 2 [file 39364bb940e06d0501ea7f19.xlsx]

## Sheet: Gene
Table S4:Gene expression of C6L and C7L subsets
GeneID	GeneName	Chr	Strand	Start	End	Annotation	Class	RA-C6L-1	RA-C6L-2	RA-C6L-3	RA-C7L-1	RA-C7L-2	RA-C7L-3	UT-C6L-1	UT-C6L-2	UT-C6L-3	UT-C7L-1	UT-C7L-2	UT-C7L-3
ENSMUSG00000000001	Gnai3	3	-	108107280	108146146	guanine nucleotide binding protein (G protein), alpha inhibiting 3 [Source:MGI Symbol;Acc:MGI:95773]	protein_coding	77.6104	60.5723	57.9781	83.1422	74.7192	67.3146	29.7556	22.9843	23.6148	17.7012	21.6019	20.0867
ENSMUSG00000000003	Pbsn	X	-	77837901	77853623	probasin [Source:MGI Symbol;Acc:MGI:1860484]	protein_coding	0	0	0	0	0	0	0	0	0	0	0	0
ENSMUSG00000000028	Cdc45	16	-	18780447	18811987	cell division cycle 45 [Source:MGI Symbol;Acc:MGI:1338073]	protein_coding	10.6522	8.76133	10.9061	18.0562	10.8909	15.57	13.1416	13.2751	7.76436	21.2205	10.8722	9.09213
ENSMUSG00000000031	H19	7	-	142575529	142578143	H19, imprinted maternally expressed transcript [Source:MGI Symbol;Acc:MGI:95891]	lincRNA	0	0	0.034672	0	0	0	0	0	0	0	0	0
ENSMUSG00000000037	Scml2	X	+	161082525	161258213	Scm polycomb group protein like 2 [Source:MGI Symbol;Acc:MGI:1340042]	protein_coding	0.026844	0	0	0	0	0	0	0	0	0	0.668871	0
ENSMUSG00000000049	Apoh	11	+	108343354	108414396	apolipoprotein H [Source:MGI Symbol;Acc:MGI:88058]	protein_coding	0	1.02328	1.32574	0	0	0	0	0	0	0	0	0
ENSMUSG00000000056	Narf	11	+	121237253	121255856	nuclear prelamin A recognition factor [Source:MGI Symbol;Acc:MGI:1914858]	protein_coding	10.0138	5.82926	5.41117	8.4516	8.27302	5.66711	5.38382	4.65529	3.9853	2.22207	4.22147	1.31858
ENSMUSG00000000058	Cav2	6	+	17281185	17289115	caveolin 2 [Source:MGI Symbol;Acc:MGI:107571]	protein_coding	3.06095	2.31001	1.4286	3.9982	3.67444	1.92823	0.638007	1.81563	0.525882	0.84651	1.56048	1.97999
ENSMUSG00000000078	Klf6	13	+	5861482	5870394	Kruppel-like factor 6 [Source:MGI Symbol;Acc:MGI:1346318]	protein_coding	152.149	112.511	98.3854	74.1944	48.5236	62.1795	116.519	114.52	105.204	60.1242	49.4963	45.5026
ENSMUSG00000000085	Scmh1	4	+	120405281	120530186	sex comb on midleg homolog 1 [Source:MGI Symbol;Acc:MGI:1352762]	protein_coding	0	0	0	0	0	0.047089	0	0.117475	0.502641	3.03899	2.51156	1.7837
ENSMUSG00000000088	Cox5a	9	+	57521274	57532426	cytochrome c oxidase subunit 5A [Source:MGI Symbol;Acc:MGI:88474]	protein_coding	348.681	436.277	433.596	633.69	692.345	768.319	205.055	268.77	227.219	248.44	252.132	164.262
ENSMUSG00000000093	Tbx2	11	+	85832551	85841948	T-box 2 [Source:MGI Symbol;Acc:MGI:98494]	protein_coding	0	0	0.034717	0	0	0	0.114378	0.103132	0	0	0.091235	0
ENSMUSG00000000094	Tbx4	11	+	85886422	85916097	T-box 4 [Source:MGI Symbol;Acc:MGI:102556]	protein_coding	0	0	0	0	0	0	0	0	0	0	0	0
ENSMUSG00000000103	Zfy2	Y	-	2106015	2170409	zinc finger protein 2, Y-linked [Source:MGI Symbol;Acc:MGI:99213]	protein_coding	0	0	0	0	0	0	0	0	0	0	0	0
ENSMUSG00000000120	Ngfr	11	-	95568818	95587735	nerve growth factor receptor (TNFR superfamily, member 16) [Source:MGI Symbol;Acc:MGI:97323]	protein_coding	0	0	0	0	0	0	0	0	0	0	0	0
ENSMUSG00000000125	Wnt3	11	+	103774150	103817957	wingless-type MMTV integration site family, member 3 [Source:MGI Symbol;Acc:MGI:98955]	protein_coding	0	0	0.02842	0.019641	0	0	0	0.104205	0	0	0	0
ENSMUSG00000000126	Wnt9a	11	+	59306928	59333552	wingless-type MMTV integration site family, member 9A [Source:MGI Symbol;Acc:MGI:2446084]	protein_coding	0	0	0	0	0	0	0	0	0	0	0	0
ENSMUSG00000000127	Fer	17	+	63863062	64139496	fer (fms/fps related) protein kinase [Source:MGI Symbol;Acc:MGI:105917]	protein_coding	1.19931	1.45169	1.45924	2.19795	0.646795	4.45649	1.64494	1.39065	2.95102	2.62482	0.433968	0.679708
ENSMUSG00000000131	Xpo6	7	-	126101715	126200501	exportin 6 [Source:MGI Symbol;Acc:MGI:2429950]	protein_coding	10.3493	10.8975	12.1001	11.9242	12.2515	12.9454	10.4078	26.3661	10.1612	7.43317	5.35653	6.49818
ENSMUSG00000000134	Tfe3	X	+	7762560	7775202	transcription factor E3 [Source:MGI Symbol;Acc:MGI:98511]	protein_coding	9.97269	5.20854	6.71228	6.76318	10.91	7.79176	5.17102	8.39625	7.10771	5.37094	6.98042	4.60882
ENSMUSG00000000142	Axin2	11	+	108920349	108950783	axin 2 [Source:MGI Symbol;Acc:MGI:1270862]	protein_coding	0	0	0	0	0	0	0	0	0.063233	0	0	0
ENSMUSG00000000148	Brat1	5	+	140705011	140719379	BRCA1-associated ATM activator 1 [Source:MGI Symbol;Acc:MGI:1891679]	protein_coding	2.66897	2.29454	2.29759	4.11374	2.641	3.0361	2.59924	1.96504	2.04711	0.848762	1.69458	0
ENSMUSG00000000149	Gna12	5	-	140758408	140830431	guanine nucleotide binding protein, alpha 12 [Source:MGI Symbol;Acc:MGI:95767]	protein_coding	13.2252	13.2026	12.0428	12.2242	12.1976	22.806	9.57922	13.0468	10.7744	9.43842	12.5812	7.61428
ENSMUSG00000000154	Slc22a18	7	+	143473736	143499334	solute carrier family 22 (organic cation transporter), member 18 [Source:MGI Symbol;Acc:MGI:1336884]	protein_coding	5.69683	7.53629	5.87911	8.04322	3.60871	8.81191	3.15957	3.08983	2.79991	6.23751	4.0602	2.99442
ENSMUSG00000000157	Itgb2l	16	-	96422288	96443619	integrin beta 2-like [Source:MGI Symbol;Acc:MGI:1277979]	protein_coding	3.61007	3.05848	2.65877	6.0423	4.89701	6.79603	1.25278	2.46606	0.805327	0	0.892065	0
ENSMUSG00000000159	Igsf5	16	+	96361668	96422121	immunoglobulin superfamily, member 5 [Source:MGI Symbol;Acc:MGI:1919308]	protein_coding	0	0.078792	0	0	0.094909	0	0	0	0	0	0	0.018607
ENSMUSG00000000167	Pih1d2	9	+	50617321	50625000	PIH1 domain containing 2 [Source:MGI Symbol;Acc:MGI:1919864]	protein_coding	0.960519	0.935372	1.15702	1.12438	0.347657	0.762801	0	0.493854	0.341541	2.55863	0	0
ENSMUSG00000000168	Dlat	9	-	50634633	50659780	dihydrolipoamide S-acetyltransferase (E2 component of pyruvate dehydrogenase complex) [Source:MGI Symbol;Acc:MGI:2385311]	protein_coding	11.6515	7.89723	6.77941	21.5905	13.8363	18.2271	4.56923	5.91287	5.5013	5.93344	2.928	6.19497
ENSMUSG00000000171	Sdhd	9	-	50596357	50603812	succinate dehydrogenase complex, subunit D, integral membrane protein [Source:MGI Symbol;Acc:MGI:1914175]	protein_coding	134.34	144.427	107.787	191.159	176.808	202.374	34.9411	33.3768	39.0382	45.4046	39.7095	28.4875
ENSMUSG00000000182	Fgf23	6	+	127072902	127081408	fibroblast growth factor 23 [Source:MGI Symbol;Acc:MGI:1891427]	protein_coding	0	0	0	0	0	0	0	0	0	0	0.596499	0
ENSMUSG00000000183	Fgf6	6	+	127015586	127028187	fibroblast growth factor 6 [Source:MGI Symbol;Acc:MGI:95520]	protein_coding	0	0	0	0	0	0	0	0.08371	0	0	0	0
ENSMUSG00000000184	Ccnd2	6	-	127125162	127152193	cyclin D2 [Source:MGI Symbol;Acc:MGI:88314]	protein_coding	0.205074	0	0.0128	0.281767	0.687634	0.677861	0.202932	0.605174	0.838931	0.894373	1.11404	1.59799
ENSMUSG00000000194	Gpr107	2	+	31152316	31218775	G protein-coupled receptor 107 [Source:MGI Symbol;Acc:MGI:2139054]	protein_coding	5.48889	4.09276	4.67674	4.61748	7.19988	6.66546	7.16504	7.42475	7.58036	7.37161	7.68929	3.74121
ENSMUSG00000000197	Nalcn	14	-	123276634	123627144	sodium leak channel, non-selective [Source:MGI Symbol;Acc:MGI:2444306]	protein_coding	0	0	0.024099	0.047782	0.004365	0.070654	0.184855	0.343925	0.74062	0.283746	0.929312	6.86716
ENSMUSG00000000202	Btbd17	11	-	114791217	114795945	BTB (POZ) domain containing 17 [Source:MGI Symbol;Acc:MGI:1919264]	protein_coding	0.268833	0.118787	0.15062	0	0.031029	0	0	0.086057	0	0	0	0
ENSMUSG00000000204	Slfn4	11	+	83175186	83190216	schlafen 4 [Source:MGI Symbol;Acc:MGI:1329010]	protein_coding	203.739	159.087	157.195	78.8581	90.3593	116.904	100.745	75.8653	74.982	36.0066	34.4393	34.5988
ENSMUSG00000000214	Th	7	-	142892752	142931128	tyrosine hydroxylase [Source:MGI Symbol;Acc:MGI:98735]	protein_coding	0	0	0	0	0	0.170722	0	0	0.237075	0.186219	0	0
ENSMUSG00000000215	Ins2	7	-	142678656	142743381	insulin II [Source:MGI Symbol;Acc:MGI:96573]	protein_coding	0	0.069531	0	0	0	0	0	0	0	0	0	0
ENSMUSG00000000216	Scnn1g	7	+	121734479	121768475	sodium channel, nonvoltage-gated 1 gamma [Source:MGI Symbol;Acc:MGI:104695]	protein_coding	0	0	0	0	0	0	0	0.022689	0	0	0	0
ENSMUSG00000000223	Drp2	X	+	134404551	134456573	dystrophin related protein 2 [Source:MGI Symbol;Acc:MGI:107432]	protein_coding	0.027189	0.035467	0	0	0	0	0	0.075987	0.16262	0	0	0
ENSMUSG00000000244	Tspan32	7	+	143005046	143019644	tetraspanin 32 [Source:MGI Symbol;Acc:MGI:1350360]	protein_coding	102.961	102.465	105.291	88.1044	96.9136	102.129	49.355	59.6485	47.8737	21.118	22.5697	17.236
ENSMUSG00000000247	Lhx2	2	+	38339281	38369733	LIM homeobox protein 2 [Source:MGI Symbol;Acc:MGI:96785]	protein_coding	0.026535	0	0	0	0	0	0.106007	0.435442	0.758788	0.342129	0	2.74413
ENSMUSG00000000248	Clec2g	6	+	128934381	128984707	C-type lectin domain family 2, member g [Source:MGI Symbol;Acc:MGI:1918059]	protein_coding	0	0	0	0	0	0	0.12531	0.222762	0.64105	1.0925	1.22506	2.28795
ENSMUSG00000000253	Gmpr	13	+	45507444	45553800	guanosine monophosphate reductase [Source:MGI Symbol;Acc:MGI:1913605]	protein_coding	0.464293	0.538689	0.125133	2.32791	0.548335	0	0	0.258613	0	0	0.422246	0
ENSMUSG00000000263	Glra1	11	-	55514238	55608198	glycine receptor, alpha 1 subunit [Source:MGI Symbol;Acc:MGI:95747]	protein_coding	3.78194	4.45128	2.5905	2.81125	1.30077	1.10237	0.545495	1.87097	1.82646	0	0	0
ENSMUSG00000000266	Mid2	X	+	140664599	140767715	midline 2 [Source:MGI Symbol;Acc:MGI:1344333]	protein_coding	0.106182	0	0.040706	0.020758	0	0	0	0.11547	0.197215	0.124903	0.419191	1.60782
ENSMUSG00000000275	Trim25	11	+	88999376	89020293	tripartite motif-containing 25 [Source:MGI Symbol;Acc:MGI:102749]	protein_coding	12.2295	8.16295	9.59808	10.4793	6.30677	6.14167	6.21368	4.32121	3.94016	2.85469	2.19583	5.8873
ENSMUSG00000000276	Dgke	11	-	89035179	89066850	diacylglycerol kinase, epsilon [Source:MGI Symbol;Acc:MGI:1889276]	protein_coding	0.872251	0.612511	0.623116	0.405695	0.283867	0.843077	0.274266	1.02818	0.318026	0.584073	0.136239	0.476752
ENSMUSG00000000278	Scpep1	11	-	88924020	88955465	serine carboxypeptidase 1 [Source:MGI Symbol;Acc:MGI:1921867]	protein_coding	2.99074	3.48304	2.41469	9.44906	10.4543	7.44919	6.32255	4.63828	4.73677	4.79923	3.26427	3.92638
ENSMUSG00000000282	Mnt	11	+	74830920	74845725	max binding protein [Source:MGI Symbol;Acc:MGI:109150]	protein_coding	2.51177	3.12134	4.4573	3.14594	3.36237	2.57831	5.55824	6.91207	5.0823	4.32585	6.12449	5.49131
ENSMUSG00000000290	Itgb2	10	+	77530252	77565708	integrin beta 2 [Source:MGI Symbol;Acc:MGI:96611]	protein_coding	215.235	178.596	209.632	113.129	105.122	83.0294	60.56	66.0067	44.2607	27.5291	25.4444	30.339
ENSMUSG00000000295	Hddc2	10	+	31313383	31328204	HD domain containing 2 [Source:MGI Symbol;Acc:MGI:1916942]	protein_coding	18.7542	35.9717	25.0125	39.9292	34.1028	47.5741	33.1293	36.3343	36.0506	44.4216	25.0486	41.9271
ENSMUSG00000000296	Tpd52l1	10	-	31332376	31445958	tumor protein D52-like 1 [Source:MGI Symbol;Acc:MGI:1298386]	protein_coding	0	0.058687	0.164635	2.14886	1.32108	0.748551	0	0.599948	0.226812	0	1.39	2.17643
ENSMUSG00000000301	Pemt	11	-	59970614	60046489	phosphatidylethanolamine N-methyltransferase [Source:MGI Symbol;Acc:MGI:104535]	protein_coding	0.989996	3.4331	1.89515	3.10827	6.79556	22.6427	1.13196	4.24812	1.44625	1.13138	1.432	1.40506
ENSMUSG00000000303	Cdh1	8	+	106603351	106670246	cadherin 1 [Source:MGI Symbol;Acc:MGI:88354]	protein_coding	0.022593	0	0.057096	0.20062	0.344828	1.75019	0	0.073822	0.040674	0.508148	0	0
ENSMUSG00000000305	Cdh4	2	+	179442431	179899373	cadherin 4 [Source:MGI Symbol;Acc:MGI:99218]	protein_coding	0	0	0.020573	0	0	0	0.392347	0.164433	0.203005	0.508275	0.150831	0.360815
ENSMUSG00000000308	Ckmt1	2	+	121357714	121363737	creatine kinase, mitochondrial 1, ubiquitous [Source:MGI Symbol;Acc:MGI:99441]	protein_coding	0.165449	0	0	0	0.232416	0	0.881231	0.779255	2.47511	1.29831	2.16578	0
ENSMUSG00000000317	Bcl6b	11	-	70224128	70229798	B cell CLL/lymphoma 6, member B [Source:MGI Symbol;Acc:MGI:1278332]	protein_coding	0	0	0	0.220314	0	0	0	0	0	0	0	0
ENSMUSG00000000318	Clec10a	11	+	70156197	70170834	C-type lectin domain family 10, member A [Source:MGI Symbol;Acc:MGI:96975]	protein_coding	3.04789	2.5994	2.03307	2.35463	3.96991	2.98439	2.55836	5.02207	4.48117	1.11129	4.62203	0.909327
ENSMUSG00000000320	Alox12	11	-	70241457	70255353	arachidonate 12-lipoxygenase [Source:MGI Symbol;Acc:MGI:87998]	protein_coding	0.104663	0.112036	0.048938	0	0	0	0	0.139526	0.13282	0	0	0
ENSMUSG00000000325	Arvcf	16	+	18348182	18407076	armadillo repeat gene deleted in velocardiofacial syndrome [Source:MGI Symbol;Acc:MGI:109620]	protein_coding	0	0.119642	0.023755	0.03516	0.008818	0	0.300455	2.11629	0.08909	4.67505	0.067569	0
ENSMUSG00000000326	Comt	16	-	18406886	18426852	catechol-O-methyltransferase [Source:MGI Symbol;Acc:MGI:88470]	protein_coding	28.0505	41.4231	34.9702	40.6847	41.6466	40.9121	23.216	20.6647	26.5924	14.2442	16.8006	12.932
ENSMUSG00000000339	Rtca	3	-	116488963	116508208	RNA 3'-terminal phosphate cyclase [Source:MGI Symbol;Acc:MGI:1913618]	protein_coding	20.327	22.592	28.1182	27.0856	34.056	46.2522	13.1604	13.0126	11.5093	7.87006	10.5286	5.42034
ENSMUSG00000000340	Dbt	3	+	116513070	116549981	dihydrolipoamide branched chain transacylase E2 [Source:MGI Symbol;Acc:MGI:105386]	protein_coding	1.92657	2.4162	2.88581	4.14448	6.1214	1.86541	3.32568	6.1221	3.79175	4.25238	3.75815	8.40368
ENSMUSG00000000346	Dazap2	15	+	100615349	100620761	DAZ associated protein 2 [Source:MGI Symbol;Acc:MGI:1344344]	protein_coding	644.477	509.226	370.904	442.279	499.668	378.624	115.099	96.1072	103.113	113.341	111.118	87.1518
ENSMUSG00000000355	Mcts1	X	+	38600578	38613426	malignant T cell amplified sequence 1 [Source:MGI Symbol;Acc:MGI:1916245]	protein_coding	78.9201	92.727	81.587	87.204	98.7848	98.8146	61.7499	48.6373	44.1875	51.5093	56.8615	25.0915
ENSMUSG00000000359	Rem1	2	+	152626951	152635198	rad and gem related GTP binding protein 1 [Source:MGI Symbol;Acc:MGI:1097696]	protein_coding	0.903473	0.219116	0.580517	1.38874	0.046607	0.361126	3.15217	3.74961	3.39632	1.91944	3.2446	1.17922
ENSMUSG00000000365	Rnf17	14	+	56402581	56525032	ring finger protein 17 [Source:MGI Symbol;Acc:MGI:1353419]	protein_coding	0.143439	0.015259	0	0	0.032636	0.191315	0.135257	0.062949	0.123608	1.06638	0.064155	0.791719
ENSMUSG00000000374	Trappc10	10	-	78186725	78244641	trafficking protein particle complex 10 [Source:MGI Symbol;Acc:MGI:1336209]	protein_coding	6.4574	5.97369	6.15045	6.7825	7.96471	6.15006	15.3662	16.0099	13.2598	9.31218	14.0572	5.9196
ENSMUSG00000000378	Ccm2	11	+	6546887	6596744	cerebral cavernous malformation 2 [Source:MGI Symbol;Acc:MGI:2384924]	protein_coding	42.0022	35.398	32.6281	36.3127	44.4365	40.2791	23.8297	21.8644	24.584	10.6256	21.4024	9.64774
ENSMUSG00000000381	Wap	11	-	6635482	6638637	whey acidic protein [Source:MGI Symbol;Acc:MGI:98943]	protein_coding	0	0	0	0	0	0.04618	0	0	0	0	0	0
ENSMUSG00000000384	Tbrg4	11	-	6615598	6626067	transforming growth factor beta regulated gene 4 [Source:MGI Symbol;Acc:MGI:1100868]	protein_coding	7.17741	7.33711	8.10376	10.2916	13.0581	13.2449	18.8969	17.5698	16.5214	19.4162	14.1824	22.2049
ENSMUSG00000000385	Tmprss2	16	-	97564682	97611195	transmembrane protease, serine 2 [Source:MGI Symbol;Acc:MGI:1354381]	protein_coding	0	0	0	0	0	0	0	0	0	0	0	0
ENSMUSG00000000386	Mx1	16	-	97447035	97462907	MX dynamin-like GTPase 1 [Source:MGI Symbol;Acc:MGI:97243]	polymorphic_pseudogene	0	0	0	0	0	0	0.543094	0.058883	1.07842	0.272983	0	0.153466
ENSMUSG00000000392	Fap	2	-	62500943	62574075	fibroblast activation protein [Source:MGI Symbol;Acc:MGI:109608]	protein_coding	0	0	0	0	0	0.07638	0.129519	0.223059	0	0.932426	0.390323	1.12851
ENSMUSG00000000394	Gcg	2	-	62474530	62483650	glucagon [Source:MGI Symbol;Acc:MGI:95674]	protein_coding	0	0	0	0	0	0	0	0	0	0	0	0
ENSMUSG00000000399	Ndufa9	6	-	126821721	126849136	NADH:ubiquinone oxidoreductase subunit A9 [Source:MGI Symbol;Acc:MGI:1913358]	protein_coding	62.7004	64.2566	58.8462	104.062	80.729	75.7199	20.6746	27.1357	22.0061	27.6371	33.2887	14.2343
ENSMUSG00000000402	Egfl6	X	-	166523007	166585720	EGF-like-domain, multiple 6 [Source:MGI Symbol;Acc:MGI:1858599]	protein_coding	0.136952	0.525092	0	0	0.062753	0.811747	0	0	0	0	0.212572	0
ENSMUSG00000000409	Lck	4	-	129548344	129573641	lymphocyte protein tyrosine kinase [Source:MGI Symbol;Acc:MGI:96756]	protein_coding	0	0.234986	0.494985	4.10389	2.26059	0.861516	0	0.255069	0.180757	0	6.25789	4.34822
ENSMUSG00000000411	Tssk3	4	-	129489014	129491022	testis-specific serine kinase 3 [Source:MGI Symbol;Acc:MGI:1929914]	protein_coding	0	0	0	0	0.307893	0	0.139938	0	0	0	0	0
ENSMUSG00000000416	Cttnbp2	6	-	18366478	18514843	cortactin binding protein 2 [Source:MGI Symbol;Acc:MGI:1353467]	protein_coding	0.0083	0.012852	0.013711	0.005303	0.042613	0	0.139619	0.158212	1.37399	1.55829	0.663146	1.70643
ENSMUSG00000000420	Galnt1	18	+	24205344	24286818	polypeptide N-acetylgalactosaminyltransferase 1 [Source:MGI Symbol;Acc:MGI:894693]	protein_coding	17.7809	18.658	14.5107	22.807	19.6059	16.9953	18.0744	15.4059	16.2352	12.9662	19.7073	10.2454
ENSMUSG00000000435	Myf5	10	-	107482908	107486134	myogenic factor 5 [Source:MGI Symbol;Acc:MGI:97252]	protein_coding	0	0	0	0	0	0	2.20238	2.06942	2.44612	4.63469	5.53613	24.9803
ENSMUSG00000000439	Mkrn2	6	+	115601902	115622624	makorin, ring finger protein, 2 [Source:MGI Symbol;Acc:MGI:1914277]	protein_coding	8.72489	5.27936	7.95693	6.28199	9.37576	9.36641	9.28613	8.16624	9.65991	7.16202	5.13509	7.59613
ENSMUSG00000000440	Pparg	6	+	115360951	115490399	peroxisome proliferator activated receptor gamma [Source:MGI Symbol;Acc:MGI:97747]	protein_coding	16.6038	15.3632	13.9746	15.0396	23.6328	8.62894	0.347867	1.06369	0.986932	0.756958	0	0
ENSMUSG00000000441	Raf1	6	-	115618067	115676635	v-raf-leukemia viral oncogene 1 [Source:MGI Symbol;Acc:MGI:97847]	protein_coding	55.3162	43.6879	38.6512	35.7893	29.4628	34.6584	19.0037	17.7614	11.7081	10.3757	11.5205	5.13297
ENSMUSG00000000486	Septin1	7	-	127214447	127233130	septin 1 [Source:MGI Symbol;Acc:MGI:1858916]	protein_coding	4.74541	9.14827	6.13397	8.50961	5.67477	9.09967	4.84528	4.23462	5.06096	2.37848	2.92522	2.50576
ENSMUSG00000000489	Pdgfb	15	-	79995874	80014977	platelet derived growth factor, B polypeptide [Source:MGI Symbol;Acc:MGI:97528]	protein_coding	0	0	0	0.268095	0	0	0	0.010347	0	0.245244	0	0.024925
ENSMUSG00000000530	Acvrl1	15	+	101128522	101145336	activin A receptor, type II-like 1 [Source:MGI Symbol;Acc:MGI:1338946]	protein_coding	0.099957	0.079082	0.149221	0.083144	0.071939	0	0.272164	0.087663	0.159755	0	0	0
ENSMUSG00000000531	Grasp	15	+	101224188	101232756	GRP1 (general receptor for phosphoinositides 1)-associated scaffold protein [Source:MGI Symbol;Acc:MGI:1860303]	protein_coding	0.18838	0.194581	0.207404	0.577575	0	0.337361	0.376487	0.707365	0.475831	0	0	1.89727
ENSMUSG00000000532	Acvr1b	15	+	101174067	101213684	activin A receptor, type 1B [Source:MGI Symbol;Acc:MGI:1338944]	protein_coding	2.30693	1.52337	2.28567	2.75979	1.55463	1.31462	1.7245	1.7468	2.09814	3.37567	0.807763	2.89599
ENSMUSG00000000538	Tom1l2	11	-	60226714	60352905	target of myb1-like 2 (chicken) [Source:MGI Symbol;Acc:MGI:2443306]	protein_coding	1.44121	1.11088	1.52314	0.423384	1.26129	1.65237	1.58962	0.861861	0.495521	0.058736	0.871809	1.11652
ENSMUSG00000000544	Gpa33	1	+	166130238	166166510	glycoprotein A33 (transmembrane) [Source:MGI Symbol;Acc:MGI:1891703]	protein_coding	0	0	0	0	0	0	0	0	0	0	0	0
ENSMUSG00000000552	Zfp385a	15	-	103313895	103340093	zinc finger protein 385A [Source:MGI Symbol;Acc:MGI:1352495]	protein_coding	0.578712	0.534089	0.475196	0.561305	2.5014	0.898615	1.02019	1.37701	1.63421	0	0.377477	0.551319
ENSMUSG00000000555	Itga5	15	-	103344286	103366763	integrin alpha 5 (fibronectin receptor alpha) [Source:MGI Symbol;Acc:MGI:96604]	protein_coding	5.61625	5.39407	5.55275	5.67238	3.86007	5.36918	6.17531	5.9499	8.02687	8.2055	3.57627	6.45756
ENSMUSG00000000560	Gabra2	5	-	70957597	71095849	gamma-aminobutyric acid (GABA) A receptor, subunit alpha 2 [Source:MGI Symbol;Acc:MGI:95614]	protein_coding	0.040142	0	0	0	0	1.09388	0.158811	0.035158	0.291733	3.37933	4.57074	0.877751
ENSMUSG00000000561	Wdr77	3	+	105959369	105970037	WD repeat domain 77 [Source:MGI Symbol;Acc:MGI:1917715]	protein_coding	13.4245	10.1975	10.3026	24.3694	19.4291	19.8135	4.52978	7.27698	5.8699	11.1687	13.0414	5.9839
ENSMUSG00000000562	Adora3	3	+	105870858	105908926	adenosine A3 receptor [Source:MGI Symbol;Acc:MGI:104847]	protein_coding	0.653434	0.456804	0.518383	0.166478	0.38906	0.172654	0.309323	1.06299	1.44769	0.098155	0.900029	0.321024
ENSMUSG00000000563	Atp5pb	3	-	105942698	105960099	ATP synthase peripheral stalk-membrane subunit b [Source:MGI Symbol;Acc:MGI:1100495]	protein_coding	221.432	252.333	235.675	313.473	272.312	282.76	109.211	105.58	100.288	75.5335	69.7599	65.0485
ENSMUSG00000000567	Sox9	11	+	112782224	112787760	SRY (sex determining region Y)-box 9 [Source:MGI Symbol;Acc:MGI:98371]	protein_coding	0	0.026918	0.014094	0	0	0	0.35271	0.645454	1.02513	1.75773	1.41508	0.647503
ENSMUSG00000000568	Hnrnpd	5	-	99955935	99978938	heterogeneous nuclear ribonucleoprotein D [Source:MGI Symbol;Acc:MGI:101947]	protein_coding	45.0692	30.2317	31.5503	26.9257	19.7361	31.9926	56.563	39.9338	63.0038	58.2161	74.223	54.9593
ENSMUSG00000000579	Dynlt1c	17	+	6601671	6609774	dynein light chain Tctex-type 1C [Source:MGI Symbol;Acc:MGI:3807476]	protein_coding	37.5628	48.9397	40.1748	40.5724	34.7097	36.782	7.23853	11.0781	7.15678	1.94315	1.44631	0.946273
ENSMUSG00000000581	C1d	11	+	17257579	17269176	C1D nuclear receptor co-repressor [Source:MGI Symbol;Acc:MGI:1927354]	protein_coding	56.814	57.1433	45.5538	44.748	63.7509	51.3318	15.4477	17.1276	12.9343	9.69271	9.94433	7.03473
ENSMUSG00000000594	Gm2a	11	+	55098115	55113029	GM2 ganglioside activator protein [Source:MGI Symbol;Acc:MGI:95762]	protein_coding	43.1675	36.1574	32.0517	38.3424	36.3564	33.0328	44.2285	49.2477	43.878	26.7102	24.6938	25.8072
ENSMUSG00000000600	Krit1	5	+	3803184	3845564	KRIT1, ankyrin repeat containing [Source:MGI Symbol;Acc:MGI:1930618]	protein_coding	27.1808	21.0953	21.2018	22.6567	14.8855	22.4944	20.2666	20.5699	21.0719	22.5528	18.8895	23.1919
ENSMUSG00000000605	Clcn4	7	-	7282309	7300851	chloride channel, voltage-sensitive 4 [Source:MGI Symbol;Acc:MGI:104571]	protein_coding	15.1511	10.2563	11.1857	6.70023	7.52323	11.6345	11.1994	12.3988	11.0574	12.5572	6.86761	5.01852
ENSMUSG00000000606	Vmn2r88	14	+	51410820	51420721	vomeronasal 2, receptor 88 [Source:MGI Symbol;Acc:MGI:1316662]	protein_coding	0.020213	0	0	0	0	0	0.156225	0.355516	0.208952	0.852379	1.32927	1.4849
ENSMUSG00000000617	Grm6	11	+	50850685	50866208	glutamate receptor, metabotropic 6 [Source:MGI Symbol;Acc:MGI:1351343]	protein_coding	0.101716	0	0	0	0.401121	0	0	0	0	0	0	0
ENSMUSG00000000627	Sema4f	6	-	82911885	82939769	sema domain, immunoglobulin domain (Ig), TM domain, and short cytoplasmic domain [Source:MGI Symbol;Acc:MGI:1340055]	protein_coding	0.038687	0	0.038511	0.011702	0	0	0	0.127742	0.097774	0.239095	0	0
ENSMUSG00000000628	Hk2	6	-	82725025	82774454	hexokinase 2 [Source:MGI Symbol;Acc:MGI:1315197]	protein_coding	11.2629	11.1278	10.7053	11.5838	12.0526	16.6072	16.5672	16.0664	14.1734	13.7073	13.8758	12.1902
ENSMUSG00000000631	Myo18a	11	+	77763246	77865980	myosin XVIIIA [Source:MGI Symbol;Acc:MGI:2667185]	protein_coding	5.5083	3.1921	3.48275	3.03201	1.24914	3.44902	4.30451	6.75119	6.95022	3.88491	3.19485	3.36807
ENSMUSG00000000632	Sez6	11	+	77930800	77979048	seizure related gene 6 [Source:MGI Symbol;Acc:MGI:104745]	protein_coding	0	0.010183	0	0	0	0	0	0.373997	0.454395	0.559366	0.230663	0.212717
ENSMUSG00000000673	Haao	17	-	83831156	83847963	3-hydroxyanthranilate 3,4-dioxygenase [Source:MGI Symbol;Acc:MGI:1349444]	protein_coding	3.57585	3.35065	3.55165	4.08903	0.667535	2.94514	4.64461	5.72013	4.48635	5.7569	1.34296	1.66763
ENSMUSG00000000682	Cd52	4	-	134082448	134095082	CD52 antigen [Source:MGI Symbol;Acc:MGI:1346088]	protein_coding	453.028	679.348	641.354	387.71	380.51	433.769	403.39	440.445	415.468	165.287	203.843	172.462
ENSMUSG00000000686	Abhd15	11	+	77515121	77538607	abhydrolase domain containing 15 [Source:MGI Symbol;Acc:MGI:1914727]	protein_coding	23.758	16.0174	17.1887	8.25691	9.16033	7.34606	4.11756	3.35357	5.3779	3.1036	0.469652	2.35362
ENSMUSG00000000690	Hoxb6	11	+	96292476	96301569	homeobox B6 [Source:MGI Symbol;Acc:MGI:96187]	protein_coding	0	0	0	0	0	0	0	0	0	0	0	0
ENSMUSG00000000693	Loxl3	6	+	83034173	83052562	lysyl oxidase-like 3 [Source:MGI Symbol;Acc:MGI:1337004]	protein_coding	0.413631	0.522632	0.125287	0.617416	0.647856	2.05906	1.41638	1.74955	1.48717	0.836372	0.400834	2.16901
ENSMUSG00000000701	Tcl1b5	12	+	105176344	105181145	T cell leukemia/lymphoma 1B, 5 [Source:MGI Symbol;Acc:MGI:1351635]	protein_coding	0	0	0	0	0	0	0	0	0.328646	0	0	0
ENSMUSG00000000706	Btn1a1	13	-	23456992	23465901	butyrophilin, subfamily 1, member A1 [Source:MGI Symbol;Acc:MGI:103118]	protein_coding	0	0	0	0	0.033133	0.029687	0	0	0	0	0	0
ENSMUSG00000000708	Kat2b	17	+	53566861	53672720	K(lysine) acetyltransferase 2B [Source:MGI Symbol;Acc:MGI:1343094]	protein_coding	19.2894	13.7056	13.9135	11.9322	11.4268	11.2521	15.6279	10.9414	14.933	16.4949	10.2344	10.7585
ENSMUSG00000000711	Rab5b	10	-	128677175	128696264	RAB5B, member RAS oncogene family [Source:MGI Symbol;Acc:MGI:105938]	protein_coding	4.86157	4.16356	4.11815	7.6496	3.56754	3.533	2.53427	2.41413	1.83895	1.48403	1.16514	1.6638
ENSMUSG00000000724	Cryba1	11	-	77718615	77725283	crystallin, beta A1 [Source:MGI Symbol;Acc:MGI:88518]	protein_coding	0	0	0	0	0	0	0	0	0	0	0	0
ENSMUSG00000000730	Dnmt3l	10	+	78041947	78063622	DNA (cytosine-5-)-methyltransferase 3-like [Source:MGI Symbol;Acc:MGI:1859287]	protein_coding	25.3233	24.7933	20.8327	25.8442	26.1674	20.8619	6.31854	13.0518	6.33127	10.2414	4.31225	3.20646
ENSMUSG00000000731	Aire	10	-	78030022	78043610	autoimmune regulator (autoimmune polyendocrinopathy candidiasis ectodermal dystrophy) [Source:MGI Symbol;Acc:MGI:1338803]	protein_coding	0	0.102919	0	0.019114	0	0	0.137572	0.117806	0	0	0	0
ENSMUSG00000000732	Icosl	10	+	78069302	78083913	icos ligand [Source:MGI Symbol;Acc:MGI:1354701]	protein_coding	7.20912	6.67528	6.24621	3.39427	3.70584	3.02604	3.81522	6.1506	4.32274	1.67302	1.46756	2.84303
ENSMUSG00000000738	Spg7	8	+	123062942	123097760	SPG7, paraplegin matrix AAA peptidase subunit [Source:MGI Symbol;Acc:MGI:2385906]	protein_coding	12.2034	10.2943	14.6083	7.21076	8.45712	15.4582	21.087	24.6255	26.3287	23.4118	17.8346	9.56732
ENSMUSG00000000739	Sult5a1	8	-	123140192	123158315	sulfotransferase family 5A, member 1 [Source:MGI Symbol;Acc:MGI:1931463]	protein_coding	0	0	0	0	0	0.053714	0.064457	0.015368	0	0.357132	0.010144	0.488557
ENSMUSG00000000740	Rpl13	8	+	123102350	123105244	ribosomal protein L13 [Source:MGI Symbol;Acc:MGI:105922]	protein_coding	2454.98	3370.13	2883.38	4262.01	4484.49	4396.92	3064.65	3531.84	3125.14	2389.39	2345.75	2088.68
ENSMUSG00000000743	Chmp1a	8	-	123204264	123212763	charged multivesicular body protein 1A [Source:MGI Symbol;Acc:MGI:1920159]	protein_coding	65.832	43.5372	40.5475	58.4736	44.9325	51.2779	21.6122	21.4146	20.2988	18.7151	26.9375	26.2044
ENSMUSG00000000751	Rpa1	11	-	75298166	75348324	replication protein A1 [Source:MGI Symbol;Acc:MGI:1915525]	protein_coding	7.32525	4.42036	4.88912	10.6499	7.36764	4.00445	4.00563	4.98617	4.68969	8.67107	5.44276	5.787
ENSMUSG00000000753	Serpinf1	11	-	75409769	75422701	serine (or cysteine) peptidase inhibitor, clade F, member 1 [Source:MGI Symbol;Acc:MGI:108080]	protein_coding	3.41577	2.95671	2.48134	12.25	9.26294	9.11376	12.4882	18.4575	21.4761	14.9279	17.604	10.9513
ENSMUSG00000000759	Tubgcp3	8	-	12614277	12672248	tubulin, gamma complex associated protein 3 [Source:MGI Symbol;Acc:MGI:2183752]	protein_coding	10.7315	8.20862	8.52962	9.4871	10.9843	7.39453	11.3698	12.8618	15.0527	5.76114	7.7732	7.52013
ENSMUSG00000000766	Oprm1	10	+	6758506	7038198	opioid receptor, mu 1 [Source:MGI Symbol;Acc:MGI:97441]	protein_coding	0.468477	0.481963	0.144486	0.269455	0.482923	0.369095	1.24016	1.17304	1.09337	3.11804	1.83734	2.33923
ENSMUSG00000000776	Polr3d	14	-	70438757	70443447	polymerase (RNA) III (DNA directed) polypeptide D [Source:MGI Symbol;Acc:MGI:1914315]	protein_coding	2.88676	2.76643	3.67221	8.61034	2.20296	5.85666	8.6576	7.00008	7.65088	10.0167	9.55694	3.50389
ENSMUSG00000000782	Tcf7	11	-	52252371	52283331	transcription factor 7, T cell specific [Source:MGI Symbol;Acc:MGI:98507]	protein_coding	0	0.040696	0	0	0	0.37684	0.376108	0.059016	0	0.168194	0	0
ENSMUSG00000000787	Ddx3x	X	+	13280970	13294052	DEAD/H (Asp-Glu-Ala-Asp/His) box polypeptide 3, X-linked [Source:MGI Symbol;Acc:MGI:103064]	protein_coding	57.8359	50.0653	47.2929	41.096	41.9769	39.2634	48.6129	50.5755	53.3838	48.1553	37.988	34.243
ENSMUSG00000000791	Il12rb1	8	+	70808449	70821424	interleukin 12 receptor, beta 1 [Source:MGI Symbol;Acc:MGI:104579]	protein_coding	1.87945	1.94693	1.55569	5.38853	2.21157	1.92935	1.03853	2.10836	1.40307	1.08915	1.22928	7.01956
ENSMUSG00000000792	Slc5a5	8	-	70882889	70892757	solute carrier family 5 (sodium iodide symporter), member 5 [Source:MGI Symbol;Acc:MGI:2149330]	protein_coding	0	0	0	0	0	0	0	0	0	0.282433	0	0
ENSMUSG00000000794	Kcnn3	3	+	89520164	89675132	potassium intermediate/small conductance calcium-activated channel, subfamily N, member 3 [Source:MGI Symbol;Acc:MGI:2153183]	protein_coding	4.4339	4.0662	3.93372	0.857615	1.83503	0.757411	0.840496	0.59586	1.29496	0.632885	0.530871	0.307103
ENSMUSG00000000804	Usp32	11	-	84984442	85140161	ubiquitin specific peptidase 32 [Source:MGI Symbol;Acc:MGI:2144475]	protein_coding	5.28585	3.9915	3.87928	2.03548	2.10363	3.63239	3.55121	6.04922	2.88168	1.35893	3.76415	1.54407
ENSMUSG00000000805	Car4	11	+	84957786	84966044	carbonic anhydrase 4 [Source:MGI Symbol;Acc:MGI:1096574]	protein_coding	201.649	215.962	183.078	194.229	184.117	155.765	13.1638	21.7263	17.5705	2.76013	7.50551	6.51484
ENSMUSG00000000811	Txnrd3	6	+	89643988	89675529	thioredoxin reductase 3 [Source:MGI Symbol;Acc:MGI:2386711]	protein_coding	1.72024	1.45576	0.975503	2.86909	3.46863	1.6206	2.01819	2.41702	1.52453	0.872285	0	0.40404
ENSMUSG00000000817	Fasl	1	-	161780689	161788495	Fas ligand (TNF superfamily, member 6) [Source:MGI Symbol;Acc:MGI:99255]	protein_coding	0	0	0	0	0.363516	1.0819	0	0	0	0	0	0
ENSMUSG00000000823	Zfp512b	2	-	181582103	181592803	zinc finger protein 512B [Source:MGI Symbol;Acc:MGI:2685478]	protein_coding	1.48393	1.1589	1.0564	1.47485	2.24892	1.98388	1.46654	1.72223	3.05003	1.42381	2.3286	0.853675
ENSMUSG00000000826	Dnajc5	2	+	181520485	181555133	DnaJ heat shock protein family (Hsp40) member C5 [Source:MGI Symbol;Acc:MGI:892995]	protein_coding	13.8929	12.3655	15.5378	14.1132	12.2066	10.3172	20.6715	22.0304	28.333	10.1355	9.12581	7.98181
ENSMUSG00000000827	Tpd52l2	2	+	181497142	181517966	tumor protein D52-like 2 [Source:MGI Symbol;Acc:MGI:1913564]	protein_coding	33.0125	36.3886	35.6355	23.5385	22.8037	26.5961	17.0785	11.0669	11.1799	14.272	5.47499	3.27846
ENSMUSG00000000838	Fmr1	X	+	68678541	68717963	fragile X mental retardation 1 [Source:MGI Symbol;Acc:MGI:95564]	protein_coding	15.8968	12.9369	11.2588	14.3131	14.274	9.61238	16.5523	16.8946	19.292	10.5584	9.51257	14.5832
ENSMUSG00000000861	Bcl11a	11	+	24078056	24174123	B cell CLL/lymphoma 11A (zinc finger protein) [Source:MGI Symbol;Acc:MGI:106190]	protein_coding	6.44161	7.25041	5.88983	8.35497	4.80686	5.47674	7.7973	6.1182	7.09426	6.9177	5.05417	7.24869
ENSMUSG00000000869	Il4	11	-	53602982	53618669	interleukin 4 [Source:MGI Symbol;Acc:MGI:96556]	protein_coding	0	0.332968	0	1.93104	2.69177	3.99425	0	0	0	0	0	1.92769
ENSMUSG00000000876	Pxmp4	2	-	154585758	154603708	peroxisomal membrane protein 4 [Source:MGI Symbol;Acc:MGI:1891701]	protein_coding	7.83891	8.56293	8.03215	7.38733	14.1049	6.36314	3.63755	5.81777	7.05709	2.20525	4.91709	2.21616
ENSMUSG00000000881	Dlg3	X	+	100767722	100818410	discs large MAGUK scaffold protein 3 [Source:MGI Symbol;Acc:MGI:1888986]	protein_coding	0.02523	0.16796	0.101004	0.386767	0	0.499069	0.059733	0.109217	0.427173	0	0.894761	0.11626
ENSMUSG00000000884	Gnb1l	16	+	18498713	18566679	guanine nucleotide binding protein (G protein), beta polypeptide 1-like [Source:MGI Symbol;Acc:MGI:1338057]	protein_coding	0.255067	2.47088	1.76334	0.528596	3.50854	2.88137	0.399316	0.415026	0.776238	0.307297	3.83422	0
ENSMUSG00000000889	Dbh	2	+	27165233	27183200	dopamine beta hydroxylase [Source:MGI Symbol;Acc:MGI:94864]	protein_coding	0	0	0	0	0	0	0	0	0	0	0	0
ENSMUSG00000000901	Mmp11	10	-	75923222	75936496	matrix metallopeptidase 11 [Source:MGI Symbol;Acc:MGI:97008]	protein_coding	0	0	0	0	0	0	0	0	0	0	0	0
ENSMUSG00000000902	Smarcb1	10	-	75896769	75921617	SWI/SNF related, matrix associated, actin dependent regulator of chromatin, subfamily b, member 1 [Source:MGI Symbol;Acc:MGI:1328366]	protein_coding	27.9393	26.7297	25.6121	43.9884	44.802	52.8754	22.638	25.4783	24.2772	11.909	24.751	17.7112
ENSMUSG00000000903	Vpreb3	10	+	75943057	75949657	pre-B lymphocyte gene 3 [Source:MGI Symbol;Acc:MGI:98938]	protein_coding	0	0	0	0.235657	0	0	0	0	0	0	0	0
ENSMUSG00000000915	Hip1r	5	+	123973628	124005558	huntingtin interacting protein 1 related [Source:MGI Symbol;Acc:MGI:1352504]	protein_coding	0.875014	0.836493	1.38002	2.74764	1.52982	2.01361	1.76553	1.39552	1.21656	0.823065	1.33782	1.22271
ENSMUSG00000000916	Nsun5	5	+	135369953	135376805	NOL1/NOP2/Sun domain family, member 5 [Source:MGI Symbol;Acc:MGI:2140844]	protein_coding	3.09151	2.73364	4.78941	5.82356	6.10713	14.291	1.41725	1.61979	4.12389	0.957675	1.06097	5.26947
ENSMUSG00000000934	Top1mt	15	-	75657035	75678800	DNA topoisomerase 1, mitochondrial [Source:MGI Symbol;Acc:MGI:1920210]	protein_coding	2.98068	6.02517	3.87076	2.43012	1.96925	4.91737	4.82249	6.07038	5.10297	8.62407	6.39903	7.80596
ENSMUSG00000000938	Hoxa10	6	-	52231197	52240854	homeobox A10 [Source:MGI Symbol;Acc:MGI:96171]	protein_coding	0	0	0	0	0	0	0.386497	0.301717	0.433906	1.1497	1.19408	1.83019
ENSMUSG00000000942	Hoxa4	6	-	52189671	52191753	homeobox A4 [Source:MGI Symbol;Acc:MGI:96176]	protein_coding	0	0	0	0	0	0	0.091194	0	0	0	0	0
ENSMUSG00000000948	Gm38393	7	-	59974149	60005064	predicted gene, 38393 [Source:MGI Symbol;Acc:MGI:5613898]	protein_coding	0	0.007409	0.016582	0.353888	0	0	0.259275	0.027505	0.348323	0.739315	1.8123	0.864512
ENSMUSG00000000957	Mmp14	14	+	54431612	54445364	matrix metallopeptidase 14 (membrane-inserted) [Source:MGI Symbol;Acc:MGI:101900]	protein_coding	0.125754	0.085439	0.025368	0	0	0.01654	0.177274	0.10345	0.112177	0.026284	0	0
ENSMUSG00000000958	Slc7a7	14	-	54369442	54417780	solute carrier family 7 (cationic amino acid transporter, y+ system), member 7 [Source:MGI Symbol;Acc:MGI:1337120]	protein_coding	20.626	20.1589	21.4278	9.68941	11.3544	4.74996	4.54317	9.59701	4.89176	1.68188	2.48612	0.668672
ENSMUSG00000000959	Oxa1l	14	+	54360834	54369673	oxidase assembly 1-like [Source:MGI Symbol;Acc:MGI:1916339]	protein_coding	13.4159	13.2584	15.7732	14.0541	14.7321	14.8427	14.283	15.6274	12.6355	4.86764	5.85302	12.6093
ENSMUSG00000000976	Heatr6	11	+	83753696	83783754	HEAT repeat containing 6 [Source:MGI Symbol;Acc:MGI:1919790]	protein_coding	8.99054	9.30431	8.5882	7.3868	10.6267	10.8247	8.74542	7.65319	7.75425	4.06056	3.96089	5.39043
ENSMUSG00000000982	Ccl3	11	-	83647844	83649355	chemokine (C-C motif) ligand 3 [Source:MGI Symbol;Acc:MGI:98260]	protein_coding	929.579	972.07	1044.81	311.65	345.004	317.135	817.413	627.944	599.832	193.237	219.723	171.706
ENSMUSG00000000983	Wfdc18	11	+	83709015	83711348	WAP four-disulfide core domain 18 [Source:MGI Symbol;Acc:MGI:107506]	protein_coding	0	0	0.303948	0	0	0	0	1.10722	0	0	0	0
ENSMUSG00000001014	Icam4	9	+	21029373	21030595	intercellular adhesion molecule 4, Landsteiner-Wiener blood group [Source:MGI Symbol;Acc:MGI:1925619]	protein_coding	0	0	0.259887	0.344046	0	0.332108	0	0	0.227742	0	0	0
ENSMUSG00000001016	Ilf2	3	+	90476126	90488379	interleukin enhancer binding factor 2 [Source:MGI Symbol;Acc:MGI:1915031]	protein_coding	22.6919	18.7472	15.8078	52.5783	39.9999	37.6529	32.1332	40.4001	36.2359	44.2543	49.2249	50.5255
ENSMUSG00000001017	Chtop	3	-	90498956	90509498	chromatin target of PRMT1 [Source:MGI Symbol;Acc:MGI:1913761]	protein_coding	30.6692	25.8395	25.3616	39.6752	27.134	33.8353	22.2603	19.1858	19.4118	10.9892	7.61277	11.1829
ENSMUSG00000001018	Snapin	3	-	90488026	90491033	SNAP-associated protein [Source:MGI Symbol;Acc:MGI:1333745]	protein_coding	66.9567	70.3645	48.2081	38.0356	40.161	26.1317	10.4538	13.5129	11.5354	6.4055	6.01315	4.13223
ENSMUSG00000001020	S100a4	3	+	90603771	90606045	S100 calcium binding protein A4 [Source:MGI Symbol;Acc:MGI:1330282]	protein_coding	63.8646	89.401	145.782	18.1418	39.5971	34.6036	718.452	721.197	693.472	536.143	435.917	376.733
ENSMUSG00000001021	S100a3	3	+	90584659	90602702	S100 calcium binding protein A3 [Source:MGI Symbol;Acc:MGI:1338849]	protein_coding	0.253413	0.058322	0.360671	0.130115	0.05764	0	0	0	0	0.069827	1e-06	0.229642
ENSMUSG00000001023	S100a5	3	+	90608523	90611780	S100 calcium binding protein A5 [Source:MGI Symbol;Acc:MGI:1338915]	protein_coding	0.65501	0	0	0	0	0.394507	1.1542	0.61586	0	0	0	0
ENSMUSG00000001025	S100a6	3	+	90612882	90624181	S100 calcium binding protein A6 (calcyclin) [Source:MGI Symbol;Acc:MGI:1339467]	protein_coding	1818.44	2671.86	3142.6	1339.43	1597.99	1685.8	3673.86	3861.71	3621.74	2496.98	2559.2	1950.08
ENSMUSG00000001027	Scn4a	11	-	106318592	106353288	sodium channel, voltage-gated, type IV, alpha [Source:MGI Symbol;Acc:MGI:98250]	protein_coding	0	0	0	0	0.022333	0	0.043123	0	0.050067	0	0	0
ENSMUSG00000001029	Icam2	11	-	106377656	106388075	intercellular adhesion molecule 2 [Source:MGI Symbol;Acc:MGI:96394]	protein_coding	21.6891	22.5344	18.2599	42.6041	25.7255	33.7016	8.35834	13.4274	11.7236	6.27797	9.26285	5.60059
ENSMUSG00000001034	Mapk7	11	-	61488812	61494406	mitogen-activated protein kinase 7 [Source:MGI Symbol;Acc:MGI:1346347]	protein_coding	2.0728	2.79724	2.57963	1.5839	1.9758	1.45308	3.21588	3.49471	5.7972	1.09012	2.89664	1.48507
ENSMUSG00000001036	Epn2	11	-	61517249	61579687	epsin 2 [Source:MGI Symbol;Acc:MGI:1333766]	protein_coding	0	0	0	0	0	0	0	0.123559	0.089615	0	2.87272	0.810352
ENSMUSG00000001039	B9d1	11	+	61505144	61512931	B9 protein domain 1 [Source:MGI Symbol;Acc:MGI:1351471]	protein_coding	0	0	0	0	3.31296	0.793932	1.39314	0	1.40826	0	1.93998	0
ENSMUSG00000001052	Sec24b	3	-	129982759	130061553	Sec24 related gene family, member B (S. cerevisiae) [Source:MGI Symbol;Acc:MGI:2139764]	protein_coding	6.42024	5.33945	7.90321	3.26829	4.26203	4.00058	10.4908	8.21819	4.9153	8.10686	4.28451	2.03674
ENSMUSG00000001053	N4bp3	11	-	51643063	51650842	NEDD4 binding protein 3 [Source:MGI Symbol;Acc:MGI:2442218]	protein_coding	4.43546	3.40604	4.80804	2.63086	1.46316	1.41746	6.69577	9.32706	6.11955	5.99685	5.71337	1.91095
ENSMUSG00000001054	Rmnd5b	11	-	51623671	51635896	required for meiotic nuclear division 5 homolog B [Source:MGI Symbol;Acc:MGI:1913339]	protein_coding	41.8671	34.5882	41.3517	42.0151	39.9918	29.4679	36.0384	31.8575	32.0523	18.6676	11.0774	9.83584
ENSMUSG00000001056	Nhp2	11	+	51619735	51623714	NHP2 ribonucleoprotein [Source:MGI Symbol;Acc:MGI:1098547]	protein_coding	136.496	167.616	163.617	270.622	289.487	273.663	135.022	155.646	124.877	129.783	145.766	94.3925
ENSMUSG00000001062	Vps9d1	8	-	123242356	123254348	VPS9 domain containing 1 [Source:MGI Symbol;Acc:MGI:1914143]	protein_coding	5.12199	6.04649	5.03827	7.17858	6.11552	6.68092	5.1152	8.13613	3.14998	3.96704	1.43768	2.40773
ENSMUSG00000001065	Zfp276	8	+	123254195	123269745	zinc finger protein (C2H2 type) 276 [Source:MGI Symbol;Acc:MGI:1888495]	protein_coding	5.38558	4.38265	4.67358	5.93861	3.86524	4.45014	3.36446	4.39766	4.0731	1.59951	2.66556	1.91173
ENSMUSG00000001076	C1ql4	15	-	99084086	99087817	complement component 1, q subcomponent-like 4 [Source:MGI Symbol;Acc:MGI:3579909]	protein_coding	0	0	0.105567	0	0	0.426073	0	0.175339	0	0	0	0
ENSMUSG00000001082	Mfsd10	5	-	34633642	34637212	major facilitator superfamily domain containing 10 [Source:MGI Symbol;Acc:MGI:1915544]	protein_coding	37.6359	40.9075	40.1364	64.9051	113.307	106.569	67.3272	67.0732	68.3136	42.8136	50.5194	40.5436
ENSMUSG00000001089	Luzp1	4	+	136469761	136554780	leucine zipper protein 1 [Source:MGI Symbol;Acc:MGI:107629]	protein_coding	0.354274	0.278015	0.055174	1.36193	0.153402	0.565076	0	0.057842	0	0	0	0.067502
ENSMUSG00000001095	Slc13a2	11	-	78397087	78422217	solute carrier family 13 (sodium-dependent dicarboxylate transporter), member 2 [Source:MGI Symbol;Acc:MGI:1276558]	protein_coding	0.611076	1.66944	1.29993	3.43872	2.18762	0.72417	0.566108	0.169107	0.582542	0	1.82016	0.513289
ENSMUSG00000001098	Kctd10	5	-	114363567	114380508	potassium channel tetramerisation domain containing 10 [Source:MGI Symbol;Acc:MGI:2141207]	protein_coding	13.3802	9.41437	13.3908	17.6995	14.1307	13.8958	8.23226	7.43238	7.72886	4.35504	0	0
ENSMUSG00000001100	Poldip2	11	+	78512193	78522736	polymerase (DNA-directed), delta interacting protein 2 [Source:MGI Symbol;Acc:MGI:1915061]	protein_coding	12.3799	11.9904	12.3083	26.093	23.102	18.8858	8.09967	8.33075	10.16	6.35105	8.00509	3.91972
ENSMUSG00000001103	Sebox	11	+	78503447	78505081	SEBOX homeobox [Source:MGI Symbol;Acc:MGI:108012]	protein_coding	0	0	0	0	0	0	0	0	0	0	0	0
ENSMUSG00000001105	Ift20	11	+	78536361	78541737	intraflagellar transport 20 [Source:MGI Symbol;Acc:MGI:1915585]	protein_coding	62.9362	73.462	78.9707	85.374	115.912	88.5086	58.5489	49.6074	56.2453	41.3074	50.7405	31.7616
ENSMUSG00000001119	Col6a1	10	-	76708792	76726168	collagen, type VI, alpha 1 [Source:MGI Symbol;Acc:MGI:88459]	protein_coding	0	0	0	0	0	0	0	0	0.047943	0	0	0
ENSMUSG00000001120	Pcbp3	10	-	76761857	76961887	poly(rC) binding protein 3 [Source:MGI Symbol;Acc:MGI:1890470]	protein_coding	0	0	0	0	0.107494	0	0	0.278951	0	0.173404	0.132747	0
ENSMUSG00000001123	Lgals9	11	-	78962974	78984946	lectin, galactose binding, soluble 9 [Source:MGI Symbol;Acc:MGI:109496]	protein_coding	134.289	138.238	126.717	112.737	94.1492	85.9516	21.0489	20.4533	13.9666	4.62118	3.79192	5.78698
ENSMUSG00000001127	Araf	X	+	20797814	20860519	Araf proto-oncogene, serine/threonine kinase [Source:MGI Symbol;Acc:MGI:88065]	protein_coding	17.3769	18.9758	16.7625	19.1318	16.2216	30.2891	21.5291	12.3201	14.3268	10.2167	9.38625	7.03886
ENSMUSG00000001128	Cfp	X	-	20925454	20931555	complement factor properdin [Source:MGI Symbol;Acc:MGI:97545]	protein_coding	73.7813	64.9343	54.6796	22.262	26.0885	26.0577	78.9143	86.4484	81.6338	52.9392	52.2943	44.0294
ENSMUSG00000001131	Timp1	X	+	20870166	20874735	tissue inhibitor of metalloproteinase 1 [Source:MGI Symbol;Acc:MGI:98752]	protein_coding	0	0.074183	0.343209	0	0	0	0	0.188044	0	0	0	0
ENSMUSG00000001134	Uxt	X	-	20941722	20962017	ubiquitously expressed prefoldin like chaperone [Source:MGI Symbol;Acc:MGI:1277988]	protein_coding	19.3491	25.7312	27.9215	36.7102	32.5301	35.191	21.1723	22.2218	16.845	9.09923	17.7647	11.5387
ENSMUSG00000001138	Cnnm3	1	+	36511867	36528237	cyclin M3 [Source:MGI Symbol;Acc:MGI:2151055]	protein_coding	3.0327	2.5688	2.66819	2.06595	3.91543	2.95842	4.13603	3.68133	1.85338	2.78284	1.66929	1.40973
ENSMUSG00000001143	Lman2l	1	-	36419871	36445271	lectin, mannose-binding 2-like [Source:MGI Symbol;Acc:MGI:2443010]	protein_coding	6.06141	5.93042	4.47331	4.67408	4.71082	7.84428	5.28946	3.29366	2.50534	4.15762	1.87597	4.34465
ENSMUSG00000001150	Mcm3ap	10	+	76468927	76515857	minichromosome maintenance complex component 3 associated protein [Source:MGI Symbol;Acc:MGI:1930089]	protein_coding	13.1351	13.0953	14.3167	11.2455	13.5251	18.9109	18.758	14.2321	13.7938	9.38217	6.32674	5.31563
ENSMUSG00000001151	Pcnt	10	-	76351263	76442786	pericentrin (kendrin) [Source:MGI Symbol;Acc:MGI:102722]	protein_coding	4.39071	3.54678	3.63396	3.35811	2.26822	5.306	7.39024	6.62955	8.09726	5.6222	9.516	12.5735
ENSMUSG00000001155	Ftcd	10	+	76575648	76590338	formiminotransferase cyclodeaminase [Source:MGI Symbol;Acc:MGI:1339962]	protein_coding	0	0.194719	0.117132	0	0	0	0	0	0	0	0	0
ENSMUSG00000001156	Mxd1	6	-	86647042	86669161	MAX dimerization protein 1 [Source:MGI Symbol;Acc:MGI:96908]	protein_coding	66.196	55.8026	46.9727	47.1363	42.1373	34.0702	21.9456	20.7989	22.4202	8.58285	9.90043	8.84986
ENSMUSG00000001157	Gmcl1	6	-	86691768	86733383	germ cell-less, spermatogenesis associated 1 [Source:MGI Symbol;Acc:MGI:1345156]	protein_coding	11.9745	9.95944	8.90599	13.5884	12.5979	6.38658	9.0798	5.89214	6.8375	7.29213	5.26617	13.3333
ENSMUSG00000001158	Snrnp27	6	-	86675151	86684522	small nuclear ribonucleoprotein 27 (U4/U6.U5) [Source:MGI Symbol;Acc:MGI:1913868]	protein_coding	64.0486	68.0818	74.2631	67.9721	78.8092	88.1357	67.0539	81.9931	72.3384	92.7292	62.8948	102.114
ENSMUSG00000001166	Oas1c	5	-	120800194	120812514	2'-5' oligoadenylate synthetase 1C [Source:MGI Symbol;Acc:MGI:2149633]	protein_coding	3.04069	3.20407	4.25242	4.04714	3.96563	3.35904	1.40943	1.82513	1.46972	0.247658	1.15399	1.60313
ENSMUSG00000001168	Oas1h	5	+	120861421	120873506	2'-5' oligoadenylate synthetase 1H [Source:MGI Symbol;Acc:MGI:2180853]	protein_coding	0	0	0.116011	0.354751	0	0	0	0.102163	0	0	0	1.8274
ENSMUSG00000001173	Ocrl	X	+	47912387	47965868	OCRL, inositol polyphosphate-5-phosphatase [Source:MGI Symbol;Acc:MGI:109589]	protein_coding	5.94479	5.02105	4.19965	4.6399	6.36837	3.92664	3.31105	3.94639	4.18076	4.02128	3.2293	5.28836
ENSMUSG00000001175	Calm1	12	+	100199435	100209814	calmodulin 1 [Source:MGI Symbol;Acc:MGI:88251]	protein_coding	282.06	281.634	314.06	387.063	362.822	368.351	258.742	319.487	266.773	165.659	135.541	136.458
ENSMUSG00000001211	Agpat3	10	-	78269178	78352489	1-acylglycerol-3-phosphate O-acyltransferase 3 [Source:MGI Symbol;Acc:MGI:1336186]	protein_coding	0	0.164721	0.162924	0	0	0.127793	0	0.296858	0.290358	0.13473	0	0
ENSMUSG00000001225	Slc26a3	12	+	31390871	31473917	solute carrier family 26, member 3 [Source:MGI Symbol;Acc:MGI:107181]	protein_coding	0.045025	0.041703	0.417158	0	0.365339	1.3364	0.308265	0.410936	0.590052	0.574375	0.353357	1.07838
ENSMUSG00000001227	Sema6b	17	-	56123085	56140343	sema domain, transmembrane domain (TM), and cytoplasmic domain, (semaphorin) 6B [Source:MGI Symbol;Acc:MGI:1202889]	protein_coding	0.645	0.946449	0.982628	0.578445	0.849002	0.733782	1.86781	2.87204	2.20688	1.12118	1.56657	0.781121
ENSMUSG00000001228	Uhrf1	17	+	56303321	56323486	ubiquitin-like, containing PHD and RING finger domains, 1 [Source:MGI Symbol;Acc:MGI:1338889]	protein_coding	5.92145	5.94883	5.26695	11.3284	11.6256	12.5547	13.2611	12.0733	11.1295	14.8561	22.7041	12.3992
ENSMUSG00000001229	Dpp9	17	-	56186807	56218905	dipeptidylpeptidase 9 [Source:MGI Symbol;Acc:MGI:2443967]	protein_coding	7.43847	9.00943	11.017	11.4266	10.1505	19.3805	7.74833	13.5914	8.5678	3.13008	8.50163	5.97913
ENSMUSG00000001240	Ramp2	11	+	101246028	101259546	receptor (calcitonin) activity modifying protein 2 [Source:MGI Symbol;Acc:MGI:1859650]	protein_coding	0	0	0	3.00847	0	0.941547	0	0	0.002885	0	0	0
ENSMUSG00000001247	Lsr	7	-	30957770	30973464	lipolysis stimulated lipoprotein receptor [Source:MGI Symbol;Acc:MGI:1927471]	protein_coding	0.917864	0.419531	0.470752	0.664235	1.0767	0.58752	1.22158	1.93379	0.95447	1.30104	0	0.731153
ENSMUSG00000001248	Gramd1a	7	-	31130127	31155896	GRAM domain containing 1A [Source:MGI Symbol;Acc:MGI:105490]	protein_coding	32.1715	24.5176	35.9455	17.5429	25.4348	26.6747	36.4488	35.9796	28.1885	11.1773	14.7901	11.3905
ENSMUSG00000001249	Hpn	7	-	31098725	31115290	hepsin [Source:MGI Symbol;Acc:MGI:1196620]	protein_coding	0.817713	0.829934	2.06311	0.478795	0	1.22341	0.569567	0.553475	0	0	0	0.371051
ENSMUSG00000001260	Gabrg1	5	-	70751047	70842617	gamma-aminobutyric acid (GABA) A receptor, subunit gamma 1 [Source:MGI Symbol;Acc:MGI:103156]	protein_coding	0	0	0	0	0	0	0.16086	0.502343	0.350771	1.00487	1.08771	3.3664
ENSMUSG00000001270	Ckb	12	-	111669361	111672338	creatine kinase, brain [Source:MGI Symbol;Acc:MGI:88407]	protein_coding	0.021982	0	0	0.662686	0	0	0	2.6578	4.40239	0.542506	0	0
ENSMUSG00000001280	Sp1	15	+	102406143	102436404	trans-acting transcription factor 1 [Source:MGI Symbol;Acc:MGI:98372]	protein_coding	10.5097	7.86882	9.39956	5.20436	7.06086	8.31515	10.2431	12.2397	11.1559	13.1673	11.636	12.0444
ENSMUSG00000001281	Itgb7	15	-	102215995	102231944	integrin beta 7 [Source:MGI Symbol;Acc:MGI:96616]	protein_coding	1.12073	0.687946	0.792407	2.25989	1.74953	1.34573	8.28135	4.42628	10.8121	5.88551	8.92654	7.63092
ENSMUSG00000001285	Myg1	15	+	102331709	102338139	melanocyte proliferating gene 1 [Source:MGI Symbol;Acc:MGI:1929864]	protein_coding	20.2817	20.0993	21.6267	23.8581	27.8656	32.1818	28.8257	31.8436	40.0483	30.8071	38.8637	33.28
ENSMUSG00000001288	Rarg	15	-	102234938	102257517	retinoic acid receptor, gamma [Source:MGI Symbol;Acc:MGI:97858]	protein_coding	4.60054	4.59577	4.12834	1.97997	4.08719	5.56492	5.12417	4.5941	4.27719	1.41126	4.01902	1.37627
ENSMUSG00000001289	Pfdn5	15	+	102326116	102331873	prefoldin 5 [Source:MGI Symbol;Acc:MGI:1928753]	protein_coding	284.857	334.986	454.936	259.038	265.255	293.787	307.173	342.332	322.812	336.261	296.673	267.08
ENSMUSG00000001300	Efnb2	8	-	8617434	8661242	ephrin B2 [Source:MGI Symbol;Acc:MGI:105097]	protein_coding	0	0.045377	0.155108	0	0.017792	0.059932	0.106508	0.223147	0.314867	0.436214	0.332049	0.694832
ENSMUSG00000001305	Rrp15	1	-	186720978	186749358	ribosomal RNA processing 15 homolog (S. cerevisiae) [Source:MGI Symbol;Acc:MGI:1914473]	protein_coding	18.9604	13.8158	20.1214	32.2348	29.1225	28.926	8.47468	15.7626	20.8315	7.43952	7.41488	10.1569
ENSMUSG00000001313	Rnd2	11	+	101464999	101471853	Rho family GTPase 2 [Source:MGI Symbol;Acc:MGI:1338755]	protein_coding	0.872465	1.4023	0.51619	2.17972	0.113906	0.201899	0.235318	0.956524	0.632063	0	0	0
ENSMUSG00000001323	Srr	11	-	74906359	74925948	serine racemase [Source:MGI Symbol;Acc:MGI:1351636]	protein_coding	1.90849	1.95765	1.85361	3.62502	2.02899	2.48306	0.316915	1.72726	1.11718	1.29888	0.414044	1.50311
ENSMUSG00000001333	Sync	4	+	129287617	129308559	syncoilin [Source:MGI Symbol;Acc:MGI:1916078]	protein_coding	0	0	0	0	0	0	0	0	0	0	0	0
ENSMUSG00000001334	Fndc5	4	+	129136999	129144593	fibronectin type III domain containing 5 [Source:MGI Symbol;Acc:MGI:1917614]	protein_coding	0	0	0.11464	0	0	0.203576	0	0.585535	0.226273	0	1.2053	0
ENSMUSG00000001348	Acp5	9	-	22126727	22135711	acid phosphatase 5, tartrate resistant [Source:MGI Symbol;Acc:MGI:87883]	protein_coding	231.907	217.258	220.239	87.7096	93.2528	88.085	24.6071	22.8125	24.1267	4.74405	7.93686	11.0158
ENSMUSG00000001349	Cnn1	9	+	22099216	22109630	calponin 1 [Source:MGI Symbol;Acc:MGI:104979]	protein_coding	0	0	0	0	0.563893	0	0	0	0	0	0	0
ENSMUSG00000001366	Fbxo9	9	-	78081499	78109065	f-box protein 9 [Source:MGI Symbol;Acc:MGI:1918788]	protein_coding	23.7939	23.6494	20.57	32.9216	27.6716	26.1242	11.74	12.4487	18.237	10.2111	7.41797	6.25959
ENSMUSG00000001376	Vps50	6	+	3498382	3603531	VPS50 EARP/GARPII complex subunit [Source:MGI Symbol;Acc:MGI:1920538]	protein_coding	8.34523	6.17866	8.39104	6.56946	7.40046	9.30072	7.04891	6.61327	9.07943	5.22307	4.73769	4.88029
ENSMUSG00000001380	Hars	18	-	36766528	36783205	histidyl-tRNA synthetase [Source:MGI Symbol;Acc:MGI:108087]	protein_coding	22.7974	18.5188	16.8049	29.3516	16.8485	23.4882	27.4307	25.0553	24.3612	20.6375	22.2991	8.42294
ENSMUSG00000001383	Zmat2	18	+	36793876	36799666	zinc finger, matrin type 2 [Source:MGI Symbol;Acc:MGI:1913742]	protein_coding	17.9522	15.1953	17.8497	11.3468	9.33345	16.5369	27.9567	34.3295	29.7416	31.0644	26.833	26.096
ENSMUSG00000001403	Ube2c	2	+	164769898	164778822	ubiquitin-conjugating enzyme E2C [Source:MGI Symbol;Acc:MGI:1915862]	protein_coding	91.4535	151.933	120.454	139.428	130.188	156.095	104.626	87.1236	75.5976	96.165	96.6054	76.3648
ENSMUSG00000001415	Smg5	3	+	88336260	88362338	Smg-5 homolog, nonsense mediated mRNA decay factor (C. elegans) [Source:MGI Symbol;Acc:MGI:2447364]	protein_coding	5.60096	2.92274	4.08732	3.77705	2.48914	2.91719	8.41632	9.00986	7.15237	6.43538	5.66878	3.16894
ENSMUSG00000001416	Cct3	3	+	88297116	88321767	chaperonin containing Tcp1, subunit 3 (gamma) [Source:MGI Symbol;Acc:MGI:104708]	protein_coding	40.8877	38.9215	44.2915	72.9573	55.3941	66.6869	44.1313	42.809	45.1028	64.511	58.6397	65.6781
ENSMUSG00000001418	Glmp	3	+	88325023	88331313	glycosylated lysosomal membrane protein [Source:MGI Symbol;Acc:MGI:1913318]	protein_coding	34.089	23.0959	26.3123	42.5263	54.6735	39.3787	13.5228	20.1757	17.6159	9.3446	13.7942	14.4866
ENSMUSG00000001419	Mef2d	3	+	88142372	88172086	myocyte enhancer factor 2D [Source:MGI Symbol;Acc:MGI:99533]	protein_coding	5.27226	3.89539	5.65945	5.91094	5.31163	2.73119	5.28299	5.18468	5.93071	4.27193	2.52587	3.49936
ENSMUSG00000001420	Tmem79	3	-	88328655	88336148	transmembrane protein 79 [Source:MGI Symbol;Acc:MGI:1919163]	protein_coding	1.70374	1.42026	2.08602	6.72891	5.59117	2.97209	0.499929	1.48587	0.743212	1.09568	3.12276	4.86916
ENSMUSG00000001424	Snd1	6	+	28475139	28935162	staphylococcal nuclease and tudor domain containing 1 [Source:MGI Symbol;Acc:MGI:1929266]	protein_coding	16.9446	12.1774	12.7581	16.8654	19.789	21.2558	18.2397	20.0096	21.3257	18.9998	16.7217	18.3849
ENSMUSG00000001435	Col18a1	10	-	77052178	77166548	collagen, type XVIII, alpha 1 [Source:MGI Symbol;Acc:MGI:88451]	protein_coding	0.052444	0.116786	0.080979	0	0	0	0.083275	0.112074	0	0.105719	0	0
ENSMUSG00000001436	Slc19a1	10	+	77032241	77061002	solute carrier family 19 (folate transporter), member 1 [Source:MGI Symbol;Acc:MGI:103182]	protein_coding	7.98928	5.56526	5.80487	19.3975	34.369	29.8233	3.72466	5.36921	6.06832	3.75497	4.93337	3.32215
ENSMUSG00000001440	Kpnb1	11	-	97159714	97187881	karyopherin (importin) beta 1 [Source:MGI Symbol;Acc:MGI:107532]	protein_coding	11.7562	8.81424	10.2682	14.103	13.149	16.58	15.4135	13.2953	15.4602	8.25038	9.14012	13.0191
ENSMUSG00000001441	Npepps	11	-	97205842	97280638	aminopeptidase puromycin sensitive [Source:MGI Symbol;Acc:MGI:1101358]	protein_coding	24.1357	20.8563	20.2936	20.0551	16.55	30.3127	36.202	38.616	30.5682	23.6396	28.6828	15.097
ENSMUSG00000001444	Tbx21	11	-	97098071	97115331	T-box 21 [Source:MGI Symbol;Acc:MGI:1888984]	protein_coding	0	0	0	0	0.195626	0.036126	0	0	0	0	0	0
ENSMUSG00000001445	Mrpl10	11	+	97041560	97049213	mitochondrial ribosomal protein L10 [Source:MGI Symbol;Acc:MGI:1333801]	protein_coding	25.9608	24.4274	25.3243	28.2453	31.9634	40.0296	18.1338	18.076	16.9098	18.1585	13.3834	24.165
ENSMUSG00000001467	Cyp51	5	-	4081145	4104746	cytochrome P450, family 51 [Source:MGI Symbol;Acc:MGI:106040]	protein_coding	8.40146	7.07444	7.78744	10.0039	14.3666	8.95676	11.9845	13.4537	13.0066	13.6891	15.3467	10.4511
ENSMUSG00000001472	Tcf25	8	+	123373753	123403835	transcription factor 25 (basic helix-loop-helix) [Source:MGI Symbol;Acc:MGI:1914105]	protein_coding	61.054	59.2105	64.0405	66.8113	73.5709	67.431	82.4844	103.558	102.256	73.5927	79.285	55.4126
ENSMUSG00000001473	Tubb6	18	+	67390717	67402749	tubulin, beta 6 class V [Source:MGI Symbol;Acc:MGI:1915201]	protein_coding	27.7878	25.7904	20.8134	30.0725	42.2875	20.2503	16.2764	13.4603	13.7936	4.63461	3.90784	4.36885
ENSMUSG00000001482	Def8	8	+	123423527	123463270	differentially expressed in FDCP 8 [Source:MGI Symbol;Acc:MGI:1346331]	protein_coding	5.62268	4.50237	4.5274	4.45461	7.3599	5.6425	4.12243	2.0991	2.70034	1.98943	2.38704	0.911171
ENSMUSG00000001493	Meox1	11	-	101877510	101894374	mesenchyme homeobox 1 [Source:MGI Symbol;Acc:MGI:103220]	protein_coding	0	0	0	0	0	0	0	0	0	0	0	0
ENSMUSG00000001494	Sost	11	-	101962458	101967015	sclerostin [Source:MGI Symbol;Acc:MGI:1921749]	protein_coding	0	0	0	0	0	0	0	0	0	0	0	0
ENSMUSG00000001496	Nkx2-1	12	-	56531958	56536908	NK2 homeobox 1 [Source:MGI Symbol;Acc:MGI:108067]	protein_coding	0	0	0	0	0	0	0	0	0.09622	0	0.095689	0
ENSMUSG00000001497	Pax9	12	+	56691767	56712822	paired box 9 [Source:MGI Symbol;Acc:MGI:97493]	protein_coding	0	0	0	0	0	0	0.179394	0.245645	0.170953	0.083458	0.461857	0.416144
ENSMUSG00000001504	Irx2	13	+	72628820	72634198	Iroquois homeobox 2 [Source:MGI Symbol;Acc:MGI:1197526]	protein_coding	0	0	0.024644	0	0	0	0.039367	0.126509	0	0	0	0
ENSMUSG00000001506	Col1a1	11	+	94936224	94953042	collagen, type I, alpha 1 [Source:MGI Symbol;Acc:MGI:88467]	protein_coding	0	0.067097	0.02629	0	0	0	0.077838	0.180786	0.208402	0.150936	0.441648	2.54281
ENSMUSG00000001507	Itga3	11	-	95044474	95076801	integrin alpha 3 [Source:MGI Symbol;Acc:MGI:96602]	protein_coding	0	0	0	0	0	0	0	0.499948	0.066647	0	0	0
ENSMUSG00000001508	Sgca	11	-	94962791	94976327	sarcoglycan, alpha (dystrophin-associated glycoprotein) [Source:MGI Symbol;Acc:MGI:894698]	protein_coding	0	0	0.048848	0	0	0	0	0	0	0	0	0
ENSMUSG00000001510	Dlx3	11	+	95120119	95125296	distal-less homeobox 3 [Source:MGI Symbol;Acc:MGI:94903]	protein_coding	0	0	0.015425	0	0	0	0	0	0	0	0	1.06166
ENSMUSG00000001517	Foxm1	6	+	128362967	128376146	forkhead box M1 [Source:MGI Symbol;Acc:MGI:1347487]	protein_coding	1.56369	1.8936	2.27888	1.97638	3.72228	4.52487	3.95595	3.57889	3.43551	6.70756	3.3273	6.5324
ENSMUSG00000001518	Itfg2	6	-	128409444	128424931	integrin alpha FG-GAP repeat containing 2 [Source:MGI Symbol;Acc:MGI:1915450]	protein_coding	3.80939	2.52788	3.2954	5.24015	6.31504	4.59361	3.00497	2.52483	2.8503	1.06045	2.35629	2.61168
ENSMUSG00000001520	Nrip2	6	+	128399296	128416427	nuclear receptor interacting protein 2 [Source:MGI Symbol;Acc:MGI:1891884]	protein_coding	0.244119	0.08129	0.144224	0	0.028602	0.216465	0.131405	0.476994	0.784747	0.308327	0.727457	0.302916
ENSMUSG00000001521	Tulp3	6	-	128321161	128355851	tubby-like protein 3 [Source:MGI Symbol;Acc:MGI:1329045]	protein_coding	0.001056	0.173633	0	0.011854	0	0.055485	0.120674	0.574969	0.234254	1.52165	0.58487	0.555692
ENSMUSG00000001524	Gtf2h4	17	-	35667730	35673739	general transcription factor II H, polypeptide 4 [Source:MGI Symbol;Acc:MGI:1338799]	protein_coding	4.28969	2.99149	4.73922	14.9855	6.63265	8.33621	8.84568	7.19169	9.4271	4.09576	13.1349	0.561959
ENSMUSG00000001525	Tubb5	17	-	35833921	35838306	tubulin, beta 5 class I [Source:MGI Symbol;Acc:MGI:107812]	protein_coding	73.0966	75.8539	72.1442	83.4577	69.2053	75.2314	116.546	133.512	112.639	102.373	107.305	81.6289
ENSMUSG00000001542	Ell2	13	+	75706757	75772364	elongation factor RNA polymerase II 2 [Source:MGI Symbol;Acc:MGI:2183438]	protein_coding	8.64957	6.68017	6.13293	3.84199	4.42087	6.8059	4.7697	4.98501	3.48351	1.73051	2.95819	3.98405
ENSMUSG00000001552	Jup	11	-	100368958	100397763	junction plakoglobin [Source:MGI Symbol;Acc:MGI:96650]	protein_coding	0	0	0.074131	0.179684	0.484476	0	0	0	0.470706	0	8.80362	0.224846
ENSMUSG00000001555	Fkbp10	11	+	100415697	100424824	FK506 binding protein 10 [Source:MGI Symbol;Acc:MGI:104769]	protein_coding	0	0	0	0	0	0	0	0.079065	0.081705	0	0	0
ENSMUSG00000001558	Klhl10	11	+	100441917	100457022	kelch-like 10 [Source:MGI Symbol;Acc:MGI:2181067]	protein_coding	0	0	0	0	0	0	0	0	0	0	0	0
ENSMUSG00000001566	Mnx1	5	-	29473034	29478470	motor neuron and pancreas homeobox 1 [Source:MGI Symbol;Acc:MGI:109160]	protein_coding	0	0	0	0	0	0	0	0	0	0	0	0
ENSMUSG00000001569	Nom1	5	+	29434664	29457843	nucleolar protein with MIF4G domain 1 [Source:MGI Symbol;Acc:MGI:1861749]	protein_coding	3.63385	3.06671	3.49219	2.26657	3.37337	2.79645	5.86144	4.43804	4.8511	2.93186	3.25351	2.99548
ENSMUSG00000001576	Ergic1	17	+	26561489	26656934	endoplasmic reticulum-golgi intermediate compartment (ERGIC) 1 [Source:MGI Symbol;Acc:MGI:1914708]	protein_coding	7.72836	10.7729	9.05383	13.7177	12.5308	8.14444	3.59334	2.50472	2.57975	4.15959	2.61317	1.44907
ENSMUSG00000001583	Tnk1	11	-	69851005	69858730	tyrosine kinase, non-receptor, 1 [Source:MGI Symbol;Acc:MGI:1930958]	protein_coding	0.00045	0	0	0	0	0.424169	0	0	0.17158	0	0.654705	0
ENSMUSG00000001588	Acap1	11	-	69881567	69895539	ArfGAP with coiled-coil, ankyrin repeat and PH domains 1 [Source:MGI Symbol;Acc:MGI:2388270]	protein_coding	42.1182	25.381	33.1399	44.6082	47.4734	47.345	34.6609	32.159	27.5094	23.545	26.0967	15.5826
ENSMUSG00000001604	Tcea3	4	+	136247729	136274898	transcription elongation factor A (SII), 3 [Source:MGI Symbol;Acc:MGI:1196908]	protein_coding	0	0.13888	0	0	0	0	0	0	0	0	0.97105	0.40308
ENSMUSG00000001622	Csn3	5	+	87925579	87932665	casein kappa [Source:MGI Symbol;Acc:MGI:107461]	protein_coding	0	0	0	0	0	0.35086	0.215732	0.204997	0.295891	0	1.79035	0
ENSMUSG00000001627	Ifrd1	12	-	40201567	40248504	interferon-related developmental regulator 1 [Source:MGI Symbol;Acc:MGI:1316717]	protein_coding	18.6408	14.5495	20.0793	27.8057	28.2794	24.2544	25.2186	16.3515	16.5401	20.9002	10.611	9.82737
ENSMUSG00000001630	Stk38l	6	+	146724995	146778812	serine/threonine kinase 38 like [Source:MGI Symbol;Acc:MGI:1922250]	protein_coding	0.888483	0.961189	1.08342	0.792076	2.65236	1.16494	1.25052	1.32548	1.08684	1.03813	0.854612	1.13761
ENSMUSG00000001632	Brpf1	6	+	113307137	113324860	bromodomain and PHD finger containing, 1 [Source:MGI Symbol;Acc:MGI:1926033]	protein_coding	11.1583	9.04195	11.7689	9.09333	13.2959	8.18325	20.3968	23.8816	25.1337	16.0557	20.8361	21.6247
ENSMUSG00000001642	Akr1b3	6	-	34302434	34317478	aldo-keto reductase family 1, member B3 (aldose reductase) [Source:MGI Symbol;Acc:MGI:1353494]	protein_coding	27.4062	24.9172	23.3463	60.4892	48.2885	46.6383	3.62036	4.34475	5.1251	1.45457	0.071166	2.35999
ENSMUSG00000001655	Hoxc13	15	+	102921103	102928814	homeobox C13 [Source:MGI Symbol;Acc:MGI:99560]	protein_coding	0	0	0	0	0	0	0	0.102964	0.107236	0	0	0.338692
ENSMUSG00000001656	Hoxc11	15	+	102954427	102957708	homeobox C11 [Source:MGI Symbol;Acc:MGI:96193]	protein_coding	0	0	0	0	0	0	0	0	0	0	0	0
ENSMUSG00000001657	Hoxc8	15	+	102990607	102994111	homeobox C8 [Source:MGI Symbol;Acc:MGI:96198]	protein_coding	0	0	0.147075	0	0.050631	0	0.40815	0.634566	1.09782	3.94528	0.962343	1.45834
ENSMUSG00000001661	Hoxc6	15	+	102998257	103011881	homeobox C6 [Source:MGI Symbol;Acc:MGI:96197]	protein_coding	0	0	0	0	0	0	0	0	0.419281	0.171364	0	0.163795
ENSMUSG00000001663	Gstt1	10	-	75783813	75798584	glutathione S-transferase, theta 1 [Source:MGI Symbol;Acc:MGI:107379]	protein_coding	0	0.060206	0.361647	0	0.083187	0	0	0	0	0	0	0
ENSMUSG00000001665	Gstt3	10	-	75774115	75781414	glutathione S-transferase, theta 3 [Source:MGI Symbol;Acc:MGI:2143526]	protein_coding	2.14037	2.17314	1.77977	2.48167	1.94348	2.07053	1.28074	0.457731	0.407578	1.42768	0.721464	0.525704
ENSMUSG00000001666	Ddt	10	-	75771230	75773414	D-dopachrome tautomerase [Source:MGI Symbol;Acc:MGI:1298381]	protein_coding	10.3291	22.7375	23.5538	24.5265	49.0993	33.862	17.539	27.4944	16.9465	16.9653	22.4689	15.4391
ENSMUSG00000001670	Tat	8	+	109990437	109999803	tyrosine aminotransferase [Source:MGI Symbol;Acc:MGI:98487]	protein_coding	0	0.625519	1.01406	0	0	0	0	0	0	0	0	0
ENSMUSG00000001672	Marveld3	8	-	109947914	109962203	MARVEL (membrane-associating) domain containing 3 [Source:MGI Symbol;Acc:MGI:1920858]	protein_coding	0	0	0	0.31932	0	0	0	0	0	0.806996	0	0
ENSMUSG00000001674	Ddx18	1	-	121553835	121567989	DEAD (Asp-Glu-Ala-Asp) box polypeptide 18 [Source:MGI Symbol;Acc:MGI:1914192]	protein_coding	18.3105	16.0996	14.529	31.5118	34.3033	25.1158	27.7961	35.8802	23.9676	23.029	29.6133	24.3442
ENSMUSG00000001687	Ubl3	5	-	148504635	148552789	ubiquitin-like 3 [Source:MGI Symbol;Acc:MGI:1344373]	protein_coding	163.59	112.76	101.27	89.7561	73.3059	64.0704	54.3645	55.6366	47.1672	26.8285	31.7877	15.8766
ENSMUSG00000001700	Gramd3	18	+	56400337	56503792	GRAM domain containing 3 [Source:MGI Symbol;Acc:MGI:1914815]	protein_coding	1.80297	1.75032	1.89155	4.4533	2.81843	0.090875	1.04807	1.67479	0.522869	3.05146	2.76211	1.94023
ENSMUSG00000001707	Eef1e1	13	-	38644207	38659058	eukaryotic translation elongation factor 1 epsilon 1 [Source:MGI Symbol;Acc:MGI:1913393]	protein_coding	15.1386	17.3367	13.3842	26.5654	30.7488	26.9007	5.64177	6.13779	4.2847	6.29557	5.4213	5.69202
ENSMUSG00000001729	Akt1	12	-	112653821	112674884	thymoma viral proto-oncogene 1 [Source:MGI Symbol;Acc:MGI:87986]	protein_coding	54.6629	43.3174	39.9515	58.919	52.1148	56.535	15.1641	18.8909	17.1775	4.83015	11.4515	6.87986
ENSMUSG00000001739	Cldn15	5	+	136966616	136975858	claudin 15 [Source:MGI Symbol;Acc:MGI:1913103]	protein_coding	9.76181	8.6022	8.12821	19.6769	11.5254	8.10048	1.11742	1.76937	1.81097	1.45202	0	0.295784
ENSMUSG00000001741	Il16	7	-	83642825	83745726	interleukin 16 [Source:MGI Symbol;Acc:MGI:1270855]	protein_coding	35.8946	26.3792	34.8476	33.0357	31.8613	26.7501	23.9942	22.8317	19.6477	5.83012	13.2833	14.33
ENSMUSG00000001750	Tcirg1	19	-	3896050	3907133	T cell, immune regulator 1, ATPase, H+ transporting, lysosomal V0 protein A3 [Source:MGI Symbol;Acc:MGI:1350931]	protein_coding	30.7609	25.1371	31.4716	29.9081	28.3531	28.6759	35.0803	38.969	19.8437	21.6747	11.4887	16.6152
ENSMUSG00000001751	Naglu	11	+	101070012	101077672	alpha-N-acetylglucosaminidase (Sanfilippo disease IIIB) [Source:MGI Symbol;Acc:MGI:1351641]	protein_coding	2.24044	1.75744	1.03958	3.32996	0.444734	0.6236	2.53127	2.42183	1.42121	1.21567	3.65708	1.38176
ENSMUSG00000001755	Coasy	11	+	101082565	101086619	Coenzyme A synthase [Source:MGI Symbol;Acc:MGI:1918993]	protein_coding	9.50479	7.91037	10.1402	16.8646	17.4467	16.7191	9.73065	11.0798	7.22839	7.32832	4.89953	8.60323
ENSMUSG00000001761	Smo	6	+	29735503	29761365	smoothened, frizzled class receptor [Source:MGI Symbol;Acc:MGI:108075]	protein_coding	0	0	0	0.019225	0	0	0	0.075077	0	0	0.020384	0
ENSMUSG00000001763	Tspan33	6	+	29694222	29718559	tetraspanin 33 [Source:MGI Symbol;Acc:MGI:1919012]	protein_coding	0.076324	0.125114	0.128419	0	0.048921	0	0	0.518453	0.214336	0.497937	0	0.921732
ENSMUSG00000001767	Crnkl1	2	-	145917479	145935014	crooked neck pre-mRNA splicing factor 1 [Source:MGI Symbol;Acc:MGI:1914127]	protein_coding	23.7863	17.1611	19.0957	21.5675	16.7635	17.0563	23.5966	26.7301	24.857	22.6819	15.5527	19.1719
ENSMUSG00000001768	Rin2	2	+	145675215	145887616	Ras and Rab interactor 2 [Source:MGI Symbol;Acc:MGI:1921280]	protein_coding	12.187	10.2176	11.1239	0.517732	5.2306	2.26217	8.08718	7.71978	5.99113	3.49575	3.27806	3.27134
ENSMUSG00000001773	Folh1	7	-	86718977	86775943	folate hydrolase 1 [Source:MGI Symbol;Acc:MGI:1858193]	protein_coding	0	0	0	0	0	0	0.123015	0	0	0	0.035728	1.04523
ENSMUSG00000001774	Chordc1	9	+	18292125	18317442	cysteine and histidine-rich domain (CHORD)-containing, zinc-binding protein 1 [Source:MGI Symbol;Acc:MGI:1914167]	protein_coding	10.683	10.9492	10.7233	18.2027	10.2952	10.4937	10.5032	9.41195	9.61518	5.72121	11.556	7.9167
ENSMUSG00000001783	Rtcb	10	-	85938637	85957823	RNA 2',3'-cyclic phosphate and 5'-OH ligase [Source:MGI Symbol;Acc:MGI:106379]	protein_coding	77.5096	55.1835	55.1764	42.1863	29.8817	43.635	21.3063	22.5117	19.7465	10.8485	29.3465	11.6039
ENSMUSG00000001785	Pwp1	10	+	85829494	85889096	PWP1 homolog, endonuclein [Source:MGI Symbol;Acc:MGI:1914735]	protein_coding	23.3976	16.8471	16.0127	23.2994	18.644	20.7778	7.52355	6.76818	9.77331	5.71852	7.27526	2.66283
ENSMUSG00000001786	Fbxo7	10	+	86021972	86051873	F-box protein 7 [Source:MGI Symbol;Acc:MGI:1917004]	protein_coding	10.4355	9.24556	7.33991	4.43179	9.51413	16.6096	2.8394	2.10501	1.54577	2.92591	3.36491	7.76908
ENSMUSG00000001794	Capns1	7	-	30186936	30198811	calpain, small subunit 1 [Source:MGI Symbol;Acc:MGI:88266]	protein_coding	70.2732	77.9956	107.665	69.5118	72.4763	79.0474	141.255	195.224	163.696	87.0905	99.576	115.227
ENSMUSG00000001802	Lrp3	7	-	35200027	35215498	low density lipoprotein receptor-related protein 3 [Source:MGI Symbol;Acc:MGI:3584516]	protein_coding	0	0	0	0	0	0	0	0.121584	0.07856	0	0	0
ENSMUSG00000001804	Dsg4	18	+	20436175	20471821	desmoglein 4 [Source:MGI Symbol;Acc:MGI:2661061]	protein_coding	0	0	0	0.114677	0.013283	0	0	0.179547	0	0	0	0.21423
ENSMUSG00000001815	Evx2	2	-	74652991	74659557	even-skipped homeobox 2 [Source:MGI Symbol;Acc:MGI:95462]	protein_coding	0.045796	0.03248	0	0	0	0	0.09304	0	0	0.836321	0	0
ENSMUSG00000001819	Hoxd13	2	+	74668310	74671599	homeobox D13 [Source:MGI Symbol;Acc:MGI:96205]	protein_coding	0	0	0	0	0	0	0	0	0	0	0	0
ENSMUSG00000001823	Hoxd12	2	+	74675013	74677705	homeobox D12 [Source:MGI Symbol;Acc:MGI:96204]	protein_coding	0	0	0	0	0	0	0	0	0	0	0.335082	0
ENSMUSG00000001827	Folr1	7	-	101858331	101870788	folate receptor 1 (adult) [Source:MGI Symbol;Acc:MGI:95568]	protein_coding	0	0	0	0	0	0	0	0	0	0	0	0
ENSMUSG00000001829	Clpb	7	+	101663633	101795506	ClpB caseinolytic peptidase B [Source:MGI Symbol;Acc:MGI:1100517]	protein_coding	4.51034	2.78724	4.05524	5.99349	9.3799	8.70927	4.75858	6.11409	6.14506	2.58317	2.54604	2.7541
ENSMUSG00000001833	Septin7	9	+	25252439	25308571	septin 7 [Source:MGI Symbol;Acc:MGI:1335094]	protein_coding	155.268	126.838	122.061	140.088	132.386	99.6556	92.6905	79.7289	82.652	69.0723	44.826	48.507
ENSMUSG00000001844	Zdhhc4	5	-	143316489	143329256	zinc finger, DHHC domain containing 4 [Source:MGI Symbol;Acc:MGI:1920131]	protein_coding	40.1185	30.6487	28.8909	41.8732	54.7751	34.3617	12.1796	14.4419	9.63401	12.9856	4.17534	12.0005
ENSMUSG00000001847	Rac1	5	-	143503634	143528036	Rac family small GTPase 1 [Source:MGI Symbol;Acc:MGI:97845]	protein_coding	120.438	138.268	128.501	172.568	176.587	126.69	40.1928	35.8479	33.5024	19.5405	17.5642	18.4646
ENSMUSG00000001855	Nup214	2	+	31974436	32053975	nucleoporin 214 [Source:MGI Symbol;Acc:MGI:1095411]	protein_coding	6.37183	5.3128	6.49904	6.09122	5.57815	10.4131	9.94198	10.735	8.30419	9.13103	4.408	3.9752
ENSMUSG00000001864	Aif1l	2	+	31950139	31973442	allograft inflammatory factor 1-like [Source:MGI Symbol;Acc:MGI:1919598]	protein_coding	0	0	0	0	0	0	0	0	0	0	0	0
ENSMUSG00000001865	Cpa3	3	-	20215620	20242181	carboxypeptidase A3, mast cell [Source:MGI Symbol;Acc:MGI:88479]	protein_coding	0.773816	0.828193	0.930501	23.4561	25.981	21.512	0	0.345766	0.739204	0	0.848543	1.25955
ENSMUSG00000001870	Ltbp1	17	+	75005568	75392512	latent transforming growth factor beta binding protein 1 [Source:MGI Symbol;Acc:MGI:109151]	protein_coding	0.06128	0.134132	0.082907	0	0	0.359461	0.313462	0.164552	0.08215	1.36161	0.113974	0.072846
ENSMUSG00000001891	Ugp2	11	-	21321138	21371201	UDP-glucose pyrophosphorylase 2 [Source:MGI Symbol;Acc:MGI:2183447]	protein_coding	49.872	43.0645	42.9051	49.2515	57.2314	44.6911	26.1481	24.4888	25.1204	23.7445	16.6382	13.4631
ENSMUSG00000001901	Kcnh6	11	+	106008124	106034549	potassium voltage-gated channel, subfamily H (eag-related), member 6 [Source:MGI Symbol;Acc:MGI:2684139]	protein_coding	0	0	0	0	0.012937	0	0	0.052087	0	0.168464	0	0
ENSMUSG00000001909	Trmt1	8	+	84686307	84699808	tRNA methyltransferase 1 [Source:MGI Symbol;Acc:MGI:1289155]	protein_coding	33.2189	35.4629	44.9489	32.5809	33.6793	34.6376	56.8235	56.1725	31.8226	39.253	32.7589	55.2627
ENSMUSG00000001910	Nacc1	8	-	84670479	84687902	nucleus accumbens associated 1, BEN and BTB (POZ) domain containing [Source:MGI Symbol;Acc:MGI:1914080]	protein_coding	2.3593	2.60086	2.43696	3.19193	3.5422	1.49014	4.42553	3.28339	5.00162	1.59642	3.56596	1.93308
ENSMUSG00000001911	Nfix	8	-	84699876	84800344	nuclear factor I/X [Source:MGI Symbol;Acc:MGI:97311]	protein_coding	10.119	12.7572	9.8718	7.84378	10.0445	11.3276	7.85855	7.90356	13.1404	5.3025	9.93342	8.83428
ENSMUSG00000001918	Slc1a5	7	+	16781340	16798274	solute carrier family 1 (neutral amino acid transporter), member 5 [Source:MGI Symbol;Acc:MGI:105305]	protein_coding	15.9486	15.1817	12.0531	35.5055	44.1512	43.7264	16.8824	28.6268	20.7428	10.9045	9.69353	18.0351
ENSMUSG00000001924	Uba1	X	+	20658326	20683179	ubiquitin-like modifier activating enzyme 1 [Source:MGI Symbol;Acc:MGI:98890]	protein_coding	30.0404	25.1879	33.3285	45.7706	31.5499	31.0792	23.3288	29.3758	28.1367	15.9551	10.3104	10.5779
ENSMUSG00000001930	Vwf	6	+	125546774	125686679	Von Willebrand factor [Source:MGI Symbol;Acc:MGI:98941]	protein_coding	1.37363	0.624716	1.08234	0.218386	0.094069	0.215341	0.750926	2.84432	1.17674	0.411442	0.075677	2.37938
ENSMUSG00000001942	Siae	9	+	37555698	37649655	sialic acid acetylesterase [Source:MGI Symbol;Acc:MGI:104803]	protein_coding	2.83261	3.05343	3.2216	4.28762	3.67387	0.953383	3.93269	2.12118	1.93845	4.10001	2.23084	3.45845
ENSMUSG00000001943	Vsig2	9	+	37539255	37544205	V-set and immunoglobulin domain containing 2 [Source:MGI Symbol;Acc:MGI:1928009]	protein_coding	0.110263	0	0	0	0	0	0	0	0	0	0	0
ENSMUSG00000001946	Esam	9	+	37528078	37538319	endothelial cell-specific adhesion molecule [Source:MGI Symbol;Acc:MGI:1916774]	protein_coding	0	0	0.041874	0	0	0.641722	0.289607	0	0	0	0	0
ENSMUSG00000001948	Spa17	9	-	37603290	37613722	sperm autoantigenic protein 17 [Source:MGI Symbol;Acc:MGI:1333778]	protein_coding	0.252922	0.651532	0.438294	1.09007	0	0	0	0.766526	0.627381	0	1.33088	0
ENSMUSG00000001962	Fam50a	X	+	74313033	74320149	family with sequence similarity 50, member A [Source:MGI Symbol;Acc:MGI:1351626]	protein_coding	28.2051	28.4185	23.7703	17.3498	21.9379	15.5297	35.1196	39.1937	37.8815	34.9817	28.5331	19.9586
ENSMUSG00000001964	Emd	X	+	74254687	74261548	emerin [Source:MGI Symbol;Acc:MGI:108117]	protein_coding	9.09492	10.4634	9.6345	9.81495	10.9215	4.15149	14.8058	14.4707	13.8277	19.9697	16.8345	10.7741
ENSMUSG00000001983	Taco1	11	+	106066061	106073612	translational activator of mitochondrially encoded cytochrome c oxidase I [Source:MGI Symbol;Acc:MGI:1917457]	protein_coding	2.18139	2.09167	2.23061	3.28749	2.66251	1.18557	1.35977	2.01917	2.62177	1.50462	2.38121	0
ENSMUSG00000001985	Grik3	4	+	125490700	125714173	glutamate receptor, ionotropic, kainate 3 [Source:MGI Symbol;Acc:MGI:95816]	protein_coding	0	0	0.003702	0	0	0	0	0.054388	0.070993	0.141483	0.022121	0
ENSMUSG00000001986	Gria3	X	+	41400854	41678601	glutamate receptor, ionotropic, AMPA3 (alpha 3) [Source:MGI Symbol;Acc:MGI:95810]	protein_coding	0.216103	0.199766	0.019531	0.866175	0.394282	0.231769	0.11031	0.393345	0.154341	2.0164	1.52741	2.37589
ENSMUSG00000001988	Npas1	7	-	16455721	16477728	neuronal PAS domain protein 1 [Source:MGI Symbol;Acc:MGI:109205]	protein_coding	0	0	0	0	0	0	0.117811	0	0	0	0	0.728095
ENSMUSG00000001995	Sipa1l2	8	-	125418063	125569808	signal-induced proliferation-associated 1 like 2 [Source:MGI Symbol;Acc:MGI:2676970]	protein_coding	4.01423	4.71733	4.59214	2.16389	2.48091	3.7394	3.7446	2.73843	2.2285	0.805068	0.998538	1.95583
ENSMUSG00000001998	Ap4e1	2	+	127008717	127067909	adaptor-related protein complex AP-4, epsilon 1 [Source:MGI Symbol;Acc:MGI:1336993]	protein_coding	2.39626	2.53283	2.10672	3.03276	2.63023	1.6729	2.64117	2.94391	4.58638	5.26564	3.0549	5.5221
ENSMUSG00000001999	Blvra	2	+	127070665	127097084	biliverdin reductase A [Source:MGI Symbol;Acc:MGI:88170]	protein_coding	34.7866	34.6155	34.2791	56.6592	29.5002	36.5337	19.9445	22.6849	22.4333	14.8687	15.0553	13.4029
ENSMUSG00000002006	Pdzd4	X	-	73793359	73824969	PDZ domain containing 4 [Source:MGI Symbol;Acc:MGI:2443483]	protein_coding	0.071702	0.036287	0	0	0	0.115509	0	0.234034	0.157479	0	0.239552	0
ENSMUSG00000002007	Srpk3	X	+	73774405	73778925	serine/arginine-rich protein specific kinase 3 [Source:MGI Symbol;Acc:MGI:1891338]	protein_coding	0.067865	0.241963	0.26614	0	0	0	0	0	0.072123	0.921922	0	0
ENSMUSG00000002010	Idh3g	X	-	73778963	73786897	isocitrate dehydrogenase 3 (NAD+), gamma [Source:MGI Symbol;Acc:MGI:1099463]	protein_coding	62.6575	61.5572	72.2174	83.1823	68.6981	77.7018	34.5811	43.862	34.1846	9.55143	44.4068	9.71525
ENSMUSG00000002012	Pnck	X	-	73655994	73660117	pregnancy upregulated non-ubiquitously expressed CaM kinase [Source:MGI Symbol;Acc:MGI:1347357]	protein_coding	0	0	0	0	0	0	0	0.522643	0.394584	0	0	0
ENSMUSG00000002014	Ssr4	X	+	73787028	73790830	signal sequence receptor, delta [Source:MGI Symbol;Acc:MGI:1099464]	protein_coding	180.855	216.607	232.085	315.87	324.405	313.341	126.391	140.721	125.923	79.9319	77.9855	86.4372
ENSMUSG00000002015	Bcap31	X	-	73686178	73716175	B cell receptor associated protein 31 [Source:MGI Symbol;Acc:MGI:1350933]	protein_coding	131.878	134.488	123.72	185.869	169.743	118.741	53.3785	61.527	53.4724	32.4792	31.5812	43.1426
ENSMUSG00000002017	Fam98a	17	-	75537086	75551946	family with sequence similarity 98, member A [Source:MGI Symbol;Acc:MGI:1919972]	protein_coding	4.73858	4.26652	4.23696	3.94073	3.78213	5.91945	7.80064	10.3458	9.47909	6.85832	6.20931	6.69135
ENSMUSG00000002020	Ltbp2	12	-	84783212	84876532	latent transforming growth factor beta binding protein 2 [Source:MGI Symbol;Acc:MGI:99502]	protein_coding	0	0	0	0	0	0	0	0	0	0	0	0
ENSMUSG00000002028	Kmt2a	9	-	44803355	44881296	lysine (K)-specific methyltransferase 2A [Source:MGI Symbol;Acc:MGI:96995]	protein_coding	2.72338	2.54704	2.56529	2.23933	2.3632	3.45176	6.3718	5.57642	5.06507	3.33977	2.72841	3.01041
ENSMUSG00000002031	Ift46	9	+	44767908	44793447	intraflagellar transport 46 [Source:MGI Symbol;Acc:MGI:1923818]	protein_coding	9.04838	9.72873	10.7426	8.97026	6.65224	6.50789	7.58943	12.766	9.90993	15.8928	8.44572	8.78519
ENSMUSG00000002032	Tmem25	9	-	44793769	44799307	transmembrane protein 25 [Source:MGI Symbol;Acc:MGI:1918937]	protein_coding	0	0.029312	0.191457	0	0	0	0	0	0.168406	0	0	0
ENSMUSG00000002033	Cd3g	9	-	44969572	44980431	CD3 antigen, gamma polypeptide [Source:MGI Symbol;Acc:MGI:88333]	protein_coding	0	0	0	0.181505	0.031734	0.046675	1.25087	1.70686	0.888169	2.0654	1.63411	2.62678
ENSMUSG00000002043	Trappc6a	7	+	19508395	19516145	trafficking protein particle complex 6A [Source:MGI Symbol;Acc:MGI:1914341]	protein_coding	78.4548	88.4243	84.7134	81.9657	98.9377	123.736	34.8483	57.1266	51.8845	31.4284	35.6643	24.6512
ENSMUSG00000002052	Supt6	11	-	78206746	78245987	SPT6, histone chaperone and transcription elongation factor [Source:MGI Symbol;Acc:MGI:107726]	protein_coding	5.04772	3.78642	4.64428	4.47735	2.74929	5.79324	7.90298	7.42473	6.25635	2.20671	3.76342	4.71849
ENSMUSG00000002055	Spag5	11	+	78301529	78322457	sperm associated antigen 5 [Source:MGI Symbol;Acc:MGI:1927470]	protein_coding	4.40547	4.34989	3.36233	1.86419	4.88098	4.67664	6.3216	4.06386	5.25174	8.85937	5.22342	6.29994
ENSMUSG00000002057	Foxn1	11	-	78357577	78386558	forkhead box N1 [Source:MGI Symbol;Acc:MGI:102949]	protein_coding	0	0	0	0	0	0	0	0	0	0	0	0
ENSMUSG00000002058	Unc119	11	+	78343482	78349164	unc-119 lipid binding chaperone [Source:MGI Symbol;Acc:MGI:1328357]	protein_coding	88.1792	71.314	69.241	66.4895	63.2817	73.1599	30.4263	30.2109	32.6833	20.6523	25.7524	9.90861
ENSMUSG00000002059	Rab34	11	+	78188430	78192193	RAB34, member RAS oncogene family [Source:MGI Symbol;Acc:MGI:104606]	protein_coding	9.65361	7.02417	8.88339	5.67666	13.1943	17.5897	3.92381	8.02467	3.99881	2.58522	5.55933	2.5705
ENSMUSG00000002064	Sdf2	11	+	78245746	78255496	stromal cell derived factor 2 [Source:MGI Symbol;Acc:MGI:108019]	protein_coding	51.6337	57.3093	62.6502	58.8348	55.4853	67.1175	40.7296	35.5684	34.3793	33.1485	27.621	41.632
ENSMUSG00000002068	Ccne1	7	-	38097984	38107534	cyclin E1 [Source:MGI Symbol;Acc:MGI:88316]	protein_coding	3.93604	1.61656	2.9258	4.05075	5.6947	6.11723	5.04699	7.22641	6.08084	3.15821	4.71691	0.77049
ENSMUSG00000002076	Hsf2bp	17	-	31944769	32036349	heat shock transcription factor 2 binding protein [Source:MGI Symbol;Acc:MGI:1921627]	protein_coding	0	0.041915	0.104585	0	0	0.274671	0.263407	0	0	0	0	0
ENSMUSG00000002083	Bbc3	7	+	16308393	16318205	BCL2 binding component 3 [Source:MGI Symbol;Acc:MGI:2181667]	protein_coding	8.88692	8.927	9.42891	12.2466	10.2233	3.89897	9.40847	7.74158	8.4326	6.01478	6.65268	3.56704
ENSMUSG00000002100	Mybpc3	2	+	91118144	91136516	myosin binding protein C, cardiac [Source:MGI Symbol;Acc:MGI:102844]	protein_coding	0.149271	0.381446	1.09361	0.058461	0.749403	0.785107	0.598404	1.05401	0.529886	0.619448	0.459911	0.602472
ENSMUSG00000002102	Psmc3	2	+	91054009	91066369	proteasome (prosome, macropain) 26S subunit, ATPase 3 [Source:MGI Symbol;Acc:MGI:1098754]	protein_coding	76.0324	67.2156	79.3083	102.208	85.5424	70.3529	110.39	105.637	103.232	89.8484	86.0494	84.3639
ENSMUSG00000002103	Acp2	2	+	91202885	91214098	acid phosphatase 2, lysosomal [Source:MGI Symbol;Acc:MGI:87882]	protein_coding	4.12503	4.15722	3.03227	3.33677	2.52039	7.12401	3.70395	5.38608	5.18704	3.26953	4.69984	4.18826
ENSMUSG00000002104	Rapsn	2	+	91035620	91045729	receptor-associated protein of the synapse [Source:MGI Symbol;Acc:MGI:99422]	protein_coding	33.5028	42.5065	40.5108	39.8036	29.894	37.4145	25.1711	22.1176	17.0596	7.98172	12.542	3.82634
ENSMUSG00000002105	Slc39a13	2	-	91061791	91070417	solute carrier family 39 (metal ion transporter), member 13 [Source:MGI Symbol;Acc:MGI:1915677]	protein_coding	6.84422	3.52244	5.55669	5.84837	4.44459	5.55523	3.50797	4.53391	5.74048	3.15578	2.54467	2.42108
ENSMUSG00000002107	Celf2	2	-	6539694	7509563	CUGBP, Elav-like family member 2 [Source:MGI Symbol;Acc:MGI:1338822]	protein_coding	34.6676	27.0502	30.8735	23.1355	27.6687	24.6732	31.7352	32.5388	37.3262	19.3033	23.5574	23.3531
ENSMUSG00000002108	Nr1h3	2	-	91184061	91202834	nuclear receptor subfamily 1, group H, member 3 [Source:MGI Symbol;Acc:MGI:1352462]	protein_coding	2.38672	2.60409	3.02187	3.33778	1.57823	0.856154	3.36274	2.08176	2.85057	4.74774	5.44071	2.50998
ENSMUSG00000002109	Ddb2	2	-	91211572	91236982	damage specific DNA binding protein 2 [Source:MGI Symbol;Acc:MGI:1355314]	protein_coding	1.88123	1.2847	2.43232	3.44818	5.07562	0.806565	0.643056	0.18286	0.286572	0	1.65134	0
ENSMUSG00000002111	Spi1	2	+	91082390	91115756	spleen focus forming virus (SFFV) proviral integration oncogene [Source:MGI Symbol;Acc:MGI:98282]	protein_coding	288.496	309.902	273.569	292.548	249.852	253.154	189.326	210.872	193.425	107.296	80.3223	94.7034
ENSMUSG00000002129	Sf3a1	11	+	4160350	4182541	splicing factor 3a, subunit 1 [Source:MGI Symbol;Acc:MGI:1914715]	protein_coding	5.58263	5.69958	5.27447	10.7811	7.07866	6.12958	6.37272	9.32078	7.44315	7.18612	9.70158	6.64601
ENSMUSG00000002147	Stat6	10	+	127642986	127660957	signal transducer and activator of transcription 6 [Source:MGI Symbol;Acc:MGI:103034]	protein_coding	24.2834	20.4908	20.4841	19.646	12.0245	11.998	33.954	33.4063	35.6832	17.0445	14.7274	15.7784
ENSMUSG00000002190	Clgn	8	+	83389867	83428552	calmegin [Source:MGI Symbol;Acc:MGI:107472]	protein_coding	0	0.031279	0	0	0	0.177604	0.185208	0	0.165121	0	0.543661	0
ENSMUSG00000002204	Napsa	7	+	44572380	44586862	napsin A aspartic peptidase [Source:MGI Symbol;Acc:MGI:109365]	protein_coding	80.2762	82.7111	84.8473	101.699	106.361	113.829	68.9871	86.4202	67.6348	53.8876	43.1512	43.975
ENSMUSG00000002205	Vrk3	7	+	44748413	44777515	vaccinia related kinase 3 [Source:MGI Symbol;Acc:MGI:2182465]	protein_coding	19.3281	16.2575	19.0332	24.7518	20.7374	20.1132	20.0777	16.7036	13.8458	2.56181	7.46538	5.64241
ENSMUSG00000002210	Smg9	7	+	24399619	24422778	smg-9 homolog, nonsense mediated mRNA decay factor (C. elegans) [Source:MGI Symbol;Acc:MGI:1919247]	protein_coding	7.94307	5.55391	6.4603	10.5523	6.6862	8.54749	7.5173	8.88398	13.6613	5.90035	7.15234	2.51096
ENSMUSG00000002221	Paxip1	5	-	27740080	27791691	PAX interacting (with transcription-activation domain) protein 1 [Source:MGI Symbol;Acc:MGI:1890430]	protein_coding	1.77446	2.11923	1.47822	3.77451	1.48217	3.02161	2.20289	2.29916	2.09115	1.63669	2.04617	1.31933
ENSMUSG00000002222	Rmnd5a	6	-	71388634	71440637	required for meiotic nuclear division 5 homolog A [Source:MGI Symbol;Acc:MGI:1915727]	protein_coding	9.42268	6.96291	7.07532	3.02834	2.7829	4.37407	5.05774	4.89296	3.23756	1.48219	4.71252	3.02126
ENSMUSG00000002227	Mov10	3	-	104794836	104818563	Mov10 RISC complex RNA helicase [Source:MGI Symbol;Acc:MGI:97054]	protein_coding	2.07676	1.90413	1.29523	2.89837	1.4719	3.70883	0.911129	1.14729	1.70884	0.685577	1.662	1.58672
ENSMUSG00000002228	Ppm1j	3	+	104781056	104786018	protein phosphatase 1J [Source:MGI Symbol;Acc:MGI:1919137]	protein_coding	0.303486	0.157055	0.402501	0	0	0	0	0.301645	0	0	0	0
ENSMUSG00000002233	Rhoc	3	+	104788375	104794459	ras homolog family member C [Source:MGI Symbol;Acc:MGI:106028]	protein_coding	1.04554	1.30256	0.56631	0.746059	2.27582	0.142887	0.974356	1.25526	0.910032	0	0	0
ENSMUSG00000002240	Prr27	5	+	87825686	87846387	proline rich 27 [Source:MGI Symbol;Acc:MGI:1921029]	protein_coding	0	0	0	0	0	0	0	0.041577	0	0	0	0.307464
ENSMUSG00000002249	Tead3	17	-	28331671	28350817	TEA domain family member 3 [Source:MGI Symbol;Acc:MGI:109241]	protein_coding	0.034883	0	0.039186	0	0	0	0.02181	0	0.158542	0	0	0
ENSMUSG00000002250	Ppard	17	+	28232700	28301474	peroxisome proliferator activator receptor delta [Source:MGI Symbol;Acc:MGI:101884]	protein_coding	0.546824	0.680681	1.14149	0.080793	0.476362	0.952787	1.73387	1.01814	1.26908	2.63313	2.24756	1.45368
ENSMUSG00000002257	Def6	17	+	28207778	28228608	differentially expressed in FDCP 6 [Source:MGI Symbol;Acc:MGI:1346328]	protein_coding	20.6766	14.8281	25.6088	23.1085	22.0514	32.7588	23.5904	19.3108	18.4469	20.735	12.5341	11.276
ENSMUSG00000002265	Peg3	7	-	6703892	6730431	paternally expressed 3 [Source:MGI Symbol;Acc:MGI:104748]	protein_coding	0	0	0	0	0	0.027876	0	0.337503	0.969762	0.995393	0.20407	1.65082
ENSMUSG00000002266	Zim1	7	-	6671269	6696450	zinc finger, imprinted 1 [Source:MGI Symbol;Acc:MGI:1341879]	protein_coding	0	0	0	0	0	0	0.035642	0.054616	0.1248	0.094036	0	0
ENSMUSG00000002274	Metrn	17	-	25793221	25797136	meteorin, glial cell differentiation regulator [Source:MGI Symbol;Acc:MGI:1917333]	protein_coding	0.559613	0.874825	0.673795	0.790575	2.42148	2.3867	0.303967	1.95777	0.99364	2.50951	0.452955	0.177143
ENSMUSG00000002279	Lmf1	17	+	25579085	25662826	lipase maturation factor 1 [Source:MGI Symbol;Acc:MGI:1923733]	protein_coding	5.68741	4.92265	5.56379	5.21234	8.72548	3.39575	3.91181	7.97391	4.95171	3.51147	1.85763	2.53062
ENSMUSG00000002280	Ciao3	17	+	25773776	25783332	cytosolic iron-sulfur assembly component 3 [Source:MGI Symbol;Acc:MGI:1914813]	protein_coding	9.42881	6.65319	7.71652	16.1118	7.97866	7.3515	6.8186	7.26981	7.29817	4.94199	2.21386	4.06613
ENSMUSG00000002289	Angptl4	17	-	33773750	33781830	angiopoietin-like 4 [Source:MGI Symbol;Acc:MGI:1888999]	protein_coding	8.61621	10.5236	7.00667	6.83557	2.17146	4.54754	1.15626	2.61617	0.825851	1.75207	0.290432	0.282686
ENSMUSG00000002297	Dbf4	5	-	8396973	8422716	DBF4 zinc finger [Source:MGI Symbol;Acc:MGI:1351328]	protein_coding	12.5914	13.4111	10.7229	19.7852	17.0684	12.8302	15.1859	17.7664	13.8032	14.7974	19.1797	28.6811
ENSMUSG00000002307	Daxx	17	+	33909414	33915590	Fas death domain-associated protein [Source:MGI Symbol;Acc:MGI:1197015]	protein_coding	4.40741	5.56128	5.0102	10.0043	8.53238	10.2522	7.09964	7.29729	19.9258	41.3886	4.12645	5.17368
ENSMUSG00000002308	Cd320	17	+	33843091	33849774	CD320 antigen [Source:MGI Symbol;Acc:MGI:1860083]	protein_coding	2.2193	2.21776	0.926641	9.92946	7.30068	10.2498	2.88077	2.16577	2.04376	3.56317	1.65109	1.90794
ENSMUSG00000002319	Ipo4	14	-	55625400	55635957	importin 4 [Source:MGI Symbol;Acc:MGI:1923001]	protein_coding	0.727718	0.63342	0.95479	1.30006	1.86595	3.40798	2.88869	6.08172	1.82488	0.615493	2.86867	7.28074
ENSMUSG00000002320	Tm9sf1	14	-	55635965	55643806	transmembrane 9 superfamily member 1 [Source:MGI Symbol;Acc:MGI:1921390]	protein_coding	9.23925	8.25672	7.33073	7.98682	16.4064	18.8302	6.26259	5.82255	5.05363	0	0.68283	7.32892
ENSMUSG00000002324	Rec8	14	+	55618037	55625395	REC8 meiotic recombination protein [Source:MGI Symbol;Acc:MGI:1929645]	protein_coding	0	0	0	0	0	1.23765	0	0.03636	0.107761	0	0	0.100796
ENSMUSG00000002325	Irf9	14	+	55603571	55610030	interferon regulatory factor 9 [Source:MGI Symbol;Acc:MGI:107587]	protein_coding	11.8921	9.68975	8.664	4.71591	6.41466	11.4457	6.54487	7.12428	5.25705	3.36523	3.36287	3.11195
ENSMUSG00000002326	Gmpr2	14	+	55671941	55679200	guanosine monophosphate reductase 2 [Source:MGI Symbol;Acc:MGI:1917903]	protein_coding	9.15293	9.99399	7.92075	9.92908	6.67192	4.6721	3.13678	4.50698	6.48407	1.56231	7.8457	30.6129
ENSMUSG00000002329	Mdp1	14	-	55657879	55660508	magnesium-dependent phosphatase 1 [Source:MGI Symbol;Acc:MGI:1915131]	protein_coding	4.74777	4.30823	4.60982	7.13631	9.64169	3.66665	4.66853	6.12842	4.72165	6.45388	6.37024	1.45358
ENSMUSG00000002332	Dhrs1	14	-	55739020	55745690	dehydrogenase/reductase (SDR family) member 1 [Source:MGI Symbol;Acc:MGI:1196314]	protein_coding	13.1407	13.1923	16.1261	10.7566	17.4466	13.2832	21.1942	6.17761	9.93469	0.875909	0.612625	3.93378
ENSMUSG00000002341	Ncan	8	-	70093085	70120873	neurocan [Source:MGI Symbol;Acc:MGI:104694]	protein_coding	0	0	0	0	0	0.042569	0.039258	0	0.12294	0.137411	0	0.238756
ENSMUSG00000002342	Tmem161a	8	+	70172356	70183681	transmembrane protein 161A [Source:MGI Symbol;Acc:MGI:2384577]	protein_coding	6.92769	4.434	4.10588	7.90129	3.06113	2.16139	6.03717	5.52262	3.5759	8.84635	7.22271	5.16083
ENSMUSG00000002343	Armc6	8	-	70220172	70234466	armadillo repeat containing 6 [Source:MGI Symbol;Acc:MGI:1924063]	protein_coding	3.10916	2.82856	5.79824	5.63492	6.58291	7.32156	7.03137	8.28671	6.67761	3.11184	5.84989	1.59247
ENSMUSG00000002345	Borcs8	8	+	70139499	70147319	BLOC-1 related complex subunit 8 [Source:MGI Symbol;Acc:MGI:1919618]	protein_coding	66.6708	92.982	96.0273	81.7474	88.7158	94.6699	39.0599	42.1932	29.5886	39.0728	31.5792	16.1706
ENSMUSG00000002346	Slc25a42	8	-	70184340	70212305	solute carrier family 25, member 42 [Source:MGI Symbol;Acc:MGI:1920345]	protein_coding	0.234322	0.58652	0.387353	1.00486	2.1479	1.47723	0.759948	0.27657	1.11723	0.457305	0	0.614932
ENSMUSG00000002365	Snx9	17	+	5841329	5931954	sorting nexin 9 [Source:MGI Symbol;Acc:MGI:1913866]	protein_coding	14.701	13.335	17.1768	11.6527	12.8753	12.4287	14.4509	13.0035	13.5264	7.74001	9.76968	7.30699
ENSMUSG00000002372	Ranbp3	17	+	56673294	56711764	RAN binding protein 3 [Source:MGI Symbol;Acc:MGI:1919060]	protein_coding	11.4041	10.7738	12.8088	15.1671	12.1496	20.5678	8.38644	11.9846	11.125	11.3933	17.5057	7.01456
ENSMUSG00000002379	Ndufa11	17	+	56717767	56722141	NADH:ubiquinone oxidoreductase subunit A11 [Source:MGI Symbol;Acc:MGI:1917125]	protein_coding	182.764	226.006	228.585	258.079	354.307	299.866	153.166	164.73	149.274	173.592	139.161	113.053
ENSMUSG00000002384	Bmp8b	4	+	123105165	123132099	bone morphogenetic protein 8b [Source:MGI Symbol;Acc:MGI:107335]	protein_coding	0	0.003455	0	0	0	0	0	0.00884	0	0	0	0
ENSMUSG00000002393	Nr2f6	8	-	71374123	71381960	nuclear receptor subfamily 2, group F, member 6 [Source:MGI Symbol;Acc:MGI:1352453]	protein_coding	4.06595	4.14738	2.70701	7.77602	6.99066	9.82895	4.65601	4.51954	3.10772	12.4097	5.56079	6.70839
ENSMUSG00000002395	Use1	8	+	71366848	71369732	unconventional SNARE in the ER 1 homolog (S. cerevisiae) [Source:MGI Symbol;Acc:MGI:1914273]	protein_coding	95.6027	98.2221	108.953	99.1002	82.526	86.364	107.399	103.148	112.057	69.4077	68.619	68.1378
ENSMUSG00000002396	Ocel1	8	+	71371298	71379361	occludin/ELL domain containing 1 [Source:MGI Symbol;Acc:MGI:1924340]	protein_coding	13.4936	16.9437	19.6293	19.9742	21.0219	18.2282	18.2559	19.6469	19.8406	19.5138	15.7696	9.08072
ENSMUSG00000002409	Dyrk1b	7	+	28179469	28187294	dual-specificity tyrosine-(Y)-phosphorylation regulated kinase 1b [Source:MGI Symbol;Acc:MGI:1330302]	protein_coding	2.43079	2.48786	2.96197	0.96134	3.58975	0.056934	3.16814	2.73898	2.52647	0.261414	0.24424	3.29158
ENSMUSG00000002413	Braf	6	-	39603237	39725463	Braf transforming gene [Source:MGI Symbol;Acc:MGI:88190]	protein_coding	3.10521	3.30043	3.25282	3.02892	3.55996	1.94698	3.77789	3.83247	5.0845	3.58141	5.0938	9.94524
ENSMUSG00000002416	Ndufb2	6	+	39592574	39603382	NADH:ubiquinone oxidoreductase subunit B2 [Source:MGI Symbol;Acc:MGI:1915448]	protein_coding	37.6623	90.2904	69.1396	103.93	143.032	106.946	83.4027	108.918	63.4999	81.5169	99.1257	37.5484
ENSMUSG00000002428	Hltf	3	+	20057811	20118490	helicase-like transcription factor [Source:MGI Symbol;Acc:MGI:1196437]	protein_coding	10.4936	9.68916	8.56008	10.3329	7.66404	10.6986	13.6806	16.0766	11.8435	9.26856	7.24499	10.2781
ENSMUSG00000002455	Prpf6	2	+	181591868	181655660	pre-mRNA splicing factor 6 [Source:MGI Symbol;Acc:MGI:1922946]	protein_coding	8.54299	5.74078	6.99341	3.72394	2.02106	4.96512	13.5991	20.292	16.1344	12.1578	20.978	10.4741
ENSMUSG00000002458	Rgs19	2	-	181688419	181693977	regulator of G-protein signaling 19 [Source:MGI Symbol;Acc:MGI:1915153]	protein_coding	141.929	156.427	146.029	136.271	141.63	97.237	53.7549	61.2255	74.8677	25.8241	30.4277	22.849
ENSMUSG00000002459	Rgs20	1	-	4909576	5070285	regulator of G-protein signaling 20 [Source:MGI Symbol;Acc:MGI:1929866]	protein_coding	0	0	0	0.049844	0	0.061695	0	0.20044	0	0.759725	0	0
ENSMUSG00000002475	Abhd3	18	-	10642092	10706771	abhydrolase domain containing 3 [Source:MGI Symbol;Acc:MGI:2147183]	protein_coding	0.853387	0.462191	0.778248	0.788774	0.118512	0.080389	0	0.367218	0.11874	0	0	0
ENSMUSG00000002477	Snrpd1	18	+	10617775	10642079	small nuclear ribonucleoprotein D1 [Source:MGI Symbol;Acc:MGI:98344]	protein_coding	81.1992	102.965	101.532	176.967	142.449	177.996	168.854	173.832	184.161	170.37	122.209	128.981
ENSMUSG00000002486	Tchp	5	+	114707760	114722327	trichoplein, keratin filament binding [Source:MGI Symbol;Acc:MGI:1925082]	protein_coding	3.80355	2.11396	3.13145	3.79591	1.85117	1.71109	7.44392	5.18175	6.18222	4.01132	2.22631	1.7555
ENSMUSG00000002489	Tiam1	16	-	89787111	90143769	T cell lymphoma invasion and metastasis 1 [Source:MGI Symbol;Acc:MGI:103306]	protein_coding	0.937817	1.39444	1.47439	1.14692	1.43852	1.86625	4.29183	2.42141	5.12789	2.79083	3.74868	1.68546
ENSMUSG00000002496	Tsc2	17	-	24595816	24632630	TSC complex subunit 2 [Source:MGI Symbol;Acc:MGI:102548]	protein_coding	3.62178	3.87959	7.38172	4.35877	8.74044	6.09398	6.985	4.88626	7.22518	7.75817	7.05081	4.34611
ENSMUSG00000002500	Rpl3l	17	+	24727820	24736143	ribosomal protein L3-like [Source:MGI Symbol;Acc:MGI:1913461]	protein_coding	10.1662	15.5866	14.8602	3.82153	2.50761	4.34184	9.05425	13.1815	11.3459	3.64364	4.18935	3.02278
ENSMUSG00000002504	Slc9a3r2	17	-	24639286	24650327	solute carrier family 9 (sodium/hydrogen exchanger), member 3 regulator 2 [Source:MGI Symbol;Acc:MGI:1890662]	protein_coding	2.23252	1.42262	2.68033	3.8604	5.79711	2.58764	1.02178	1.61652	0.956471	0	2.1515	0
ENSMUSG00000002524	Puf60	15	-	76070182	76080924	poly-U binding splicing factor 60 [Source:MGI Symbol;Acc:MGI:1915209]	protein_coding	112.951	94.361	95.1714	146.66	145.127	117.949	85.299	96.6291	84.9779	58.5375	53.9884	43.6566
ENSMUSG00000002546	Golga2	2	+	32287384	32307921	golgi autoantigen, golgin subfamily a, 2 [Source:MGI Symbol;Acc:MGI:2139395]	protein_coding	7.93237	4.45663	6.0948	5.85514	4.55311	3.8416	6.23265	5.64232	6.8841	5.16611	5.48539	4.7191
ENSMUSG00000002550	Uck1	2	-	32255002	32260159	uridine-cytidine kinase 1 [Source:MGI Symbol;Acc:MGI:98904]	protein_coding	10.1342	10.2848	7.61998	12.2488	7.92292	8.26176	5.43273	5.98831	5.05306	3.26494	0	1.17585
ENSMUSG00000002565	Scin	12	-	40059769	40134228	scinderin [Source:MGI Symbol;Acc:MGI:1306794]	protein_coding	0	0	0	0	0	0	0.08649	0.419174	0.20571	0.44093	0.640649	0.645817
ENSMUSG00000002578	Ikzf4	10	-	128630843	128669358	IKAROS family zinc finger 4 [Source:MGI Symbol;Acc:MGI:1343139]	protein_coding	0.081848	0.028945	0.032908	1.10538	0	0.169428	0.125951	0.121672	0.202942	0.456522	0.42758	0.237924
ENSMUSG00000002580	Mien1	11	-	98437708	98438991	migration and invasion enhancer 1 [Source:MGI Symbol;Acc:MGI:1913678]	protein_coding	54.3282	64.3342	62.1699	84.3785	75.0203	83.3135	45.7219	46.3506	47.8408	18.0526	25.6504	28.6588
ENSMUSG00000002588	Pon1	6	-	5168090	5193946	paraoxonase 1 [Source:MGI Symbol;Acc:MGI:103295]	protein_coding	0	0.49636	0.834325	0	0	0.128273	0	0.176741	0.212184	0.938904	0	1.46965
ENSMUSG00000002602	Axl	7	-	25757273	25788705	AXL receptor tyrosine kinase [Source:MGI Symbol;Acc:MGI:1347244]	protein_coding	0.194223	0.111349	0.200799	0.468522	0	0	0.073981	0.09225	0.378949	0.481948	0	0
ENSMUSG00000002603	Tgfb1	7	+	25687002	25705077	transforming growth factor, beta 1 [Source:MGI Symbol;Acc:MGI:98725]	protein_coding	14.757	15.4828	12.7476	23.7076	20.3529	17.9118	30.5628	34.5507	31.3079	32.8198	43.455	37.4547
ENSMUSG00000002608	Ccdc97	7	-	25711106	25719088	coiled-coil domain containing 97 [Source:MGI Symbol;Acc:MGI:1196455]	protein_coding	10.339	7.42383	9.31841	11.0414	13.5262	10.18	9.40132	9.45601	9.2783	7.65511	2.99231	3.84809
ENSMUSG00000002617	Zfp40	17	-	23173869	23193252	zinc finger protein 40 [Source:MGI Symbol;Acc:MGI:99185]	protein_coding	6.7239	4.44789	4.92885	1.0324	1.52259	1.27113	1.97489	2.0361	2.80866	0.703872	1.00953	1.17396
ENSMUSG00000002625	Akap8l	17	-	32321424	32350607	A kinase (PRKA) anchor protein 8-like [Source:MGI Symbol;Acc:MGI:1860606]	protein_coding	22.3758	17.2984	19.4895	15.5351	16.802	7.35145	23.4201	25.2256	22.5223	9.04679	9.39143	9.61108
ENSMUSG00000002633	Shh	5	-	28456815	28467256	sonic hedgehog [Source:MGI Symbol;Acc:MGI:98297]	protein_coding	0	0	0	0	0	0	0	0.05249	0	0	0	0
ENSMUSG00000002635	Pdcd2l	7	-	34184499	34196661	programmed cell death 2-like [Source:MGI Symbol;Acc:MGI:1915329]	protein_coding	13.9988	15.2686	14.2641	26.3696	21.6976	18.5937	10.1015	10.2627	4.36419	4.17568	6.33042	2.91021
ENSMUSG00000002658	Gtf2f1	17	-	57003405	57011288	general transcription factor IIF, polypeptide 1 [Source:MGI Symbol;Acc:MGI:1923848]	protein_coding	17.9614	13.1329	18.2728	17.3193	14.2536	15.7504	43.0705	57.4487	47.3911	49.0621	38.4942	40.9829
ENSMUSG00000002660	Clpp	17	+	56990305	56996188	caseinolytic mitochondrial matrix peptidase proteolytic subunit [Source:MGI Symbol;Acc:MGI:1858213]	protein_coding	24.3886	30.9183	31.0027	56.3032	63.1405	52.8776	22.7662	23.6577	20.9019	21.8899	18.2039	23.1957
ENSMUSG00000002661	Alkbh7	17	+	56997339	56999322	alkB homolog 7 [Source:MGI Symbol;Acc:MGI:1913650]	protein_coding	9.794	9.66937	13.3389	11.643	7.11272	15.489	5.92795	6.74699	4.93526	7.06051	2.94321	2.37193
ENSMUSG00000002664	Pspn	17	-	56999457	57000018	persephin [Source:MGI Symbol;Acc:MGI:1201684]	protein_coding	0	0	0.390989	0	0	2.79365	0	0	0	0	0	0
ENSMUSG00000002668	Dennd1c	17	-	57065905	57078514	DENN/MADD domain containing 1C [Source:MGI Symbol;Acc:MGI:1918035]	protein_coding	7.17041	4.83884	5.87707	7.51609	5.11247	4.39157	5.54134	2.97735	5.26915	1.78306	2.23714	2.24978
ENSMUSG00000002679	Med6	12	-	81573557	81595008	mediator complex subunit 6 [Source:MGI Symbol;Acc:MGI:1917042]	protein_coding	16.6735	15.164	14.397	25.679	19.1261	16.545	13.5708	17.5596	13.9552	11.3078	13.9741	6.60832
ENSMUSG00000002688	Prkd1	12	-	50341231	50649098	protein kinase D1 [Source:MGI Symbol;Acc:MGI:99879]	protein_coding	0	0	0	0	0	0	0	0	0	0	0.669017	0.591296
ENSMUSG00000002699	Lcp2	11	+	34046920	34092295	lymphocyte cytosolic protein 2 [Source:MGI Symbol;Acc:MGI:1321402]	protein_coding	52.813	44.4174	41.1549	39.3454	39.8883	36.225	29.9345	27.7856	28.9038	18.5857	17.0569	17.1031
ENSMUSG00000002718	Cse1l	2	+	166906040	166946389	chromosome segregation 1-like (S. cerevisiae) [Source:MGI Symbol;Acc:MGI:1339951]	protein_coding	8.80202	6.68903	7.14422	14.7122	17.5334	14.5294	7.27011	7.19008	7.6933	9.8766	12.6751	3.5512
ENSMUSG00000002728	Naa20	2	+	145902099	145916425	N(alpha)-acetyltransferase 20, NatB catalytic subunit [Source:MGI Symbol;Acc:MGI:1915127]	protein_coding	54.9908	57.7151	44.6214	95.0922	56.4864	64.3271	30.3962	23.1057	23.8723	8.85961	14.4956	13.4137
ENSMUSG00000002731	Prkra	2	-	76629898	76648015	protein kinase, interferon inducible double stranded RNA dependent activator [Source:MGI Symbol;Acc:MGI:1344375]	protein_coding	13.0013	11.997	15.3825	11.7038	16.065	12.603	5.33827	8.06877	8.5969	7.44494	3.5801	3.75142
ENSMUSG00000002732	Fkbp7	2	-	76663044	76673116	FK506 binding protein 7 [Source:MGI Symbol;Acc:MGI:1336879]	protein_coding	2.97854	4.37303	1.18308	0	2.78512	5.75428	1.84826	1.60502	2.34832	1.09353	0.57149	0
ENSMUSG00000002733	Plekha3	2	+	76675281	76696828	pleckstrin homology domain-containing, family A (phosphoinositide binding specific) member 3 [Source:MGI Symbol;Acc:MGI:1932515]	protein_coding	12.7306	10.5824	10.6767	14.4467	12.457	13.5659	11.3667	11.1414	8.68445	8.30646	6.44329	8.59389
ENSMUSG00000002741	Ykt6	11	+	5955693	5967780	YKT6 v-SNARE homolog (S. cerevisiae) [Source:MGI Symbol;Acc:MGI:1927550]	protein_coding	9.39162	10.0167	14.188	10.1755	9.14461	19.0126	16.8477	16.4337	15.3195	11.9874	12.2993	9.80977
ENSMUSG00000002748	Baz1b	5	+	135187264	135246129	bromodomain adjacent to zinc finger domain, 1B [Source:MGI Symbol;Acc:MGI:1353499]	protein_coding	13.9271	8.76597	10.5306	12.7977	5.09479	12.6824	28.9786	30.6229	33.4001	22.5109	29.5431	24.703
ENSMUSG00000002763	Pex6	17	+	46711463	46725541	peroxisomal biogenesis factor 6 [Source:MGI Symbol;Acc:MGI:2385054]	protein_coding	4.48285	3.14414	4.62408	7.13382	7.44981	4.65097	4.42294	7.51249	3.87276	6.78601	9.21084	5.2603
ENSMUSG00000002767	Mrpl2	17	+	46646229	46650139	mitochondrial ribosomal protein L2 [Source:MGI Symbol;Acc:MGI:1351622]	protein_coding	53.8332	54.5894	57.1143	79.9873	61.8218	57.2926	40.0032	53.6543	42.7289	62.712	85.8579	50.9736
ENSMUSG00000002768	Mea1	17	+	46678793	46683111	male enhanced antigen 1 [Source:MGI Symbol;Acc:MGI:96957]	protein_coding	75.0549	82.2194	99.0608	90.4506	70.0311	96.6045	64.5909	71.9912	58.8344	28.477	22.6794	12.8486
ENSMUSG00000002769	Gnmt	17	-	46725664	46729168	glycine N-methyltransferase [Source:MGI Symbol;Acc:MGI:1202304]	protein_coding	0.158664	0.990618	1.27543	0.122552	0	0.671934	0	0	0	0	0.359585	0
ENSMUSG00000002771	Grin2d	7	-	45831883	45878378	glutamate receptor, ionotropic, NMDA2D (epsilon 4) [Source:MGI Symbol;Acc:MGI:95823]	protein_coding	0.188428	0.106948	0.076829	0	0.054031	0.059769	0.439889	0.626517	0.569245	0.555295	0.49863	0.307684
ENSMUSG00000002778	Kdelr1	7	+	45872772	45883732	KDEL (Lys-Asp-Glu-Leu) endoplasmic reticulum protein retention receptor 1 [Source:MGI Symbol;Acc:MGI:1915387]	protein_coding	15.4022	20.8983	19.1271	12.6122	20.3798	15.0362	18.3136	23.0013	25.2625	37.0704	28.3939	24.1331
ENSMUSG00000002781	Tmem143	7	+	45896941	45917413	transmembrane protein 143 [Source:MGI Symbol;Acc:MGI:1917459]	protein_coding	1.45799	0.628419	0.680151	1.88424	0.349432	0.787153	0.479004	1.27179	1.78443	1.25235	2.28414	2.22837
ENSMUSG00000002791	Pdxk-ps	17	-	32076083	32107350	pyridoxal (pyridoxine, vitamin B6) kinase, pseudogene [Source:MGI Symbol;Acc:MGI:1933201]	transcribed_unprocessed_pseudogene	0.055556	0	0.106381	0	0.177157	0.059034	0	0	0	0	0	0
ENSMUSG00000002797	Ggct	6	-	54982580	54992950	gamma-glutamyl cyclotransferase [Source:MGI Symbol;Acc:MGI:95700]	protein_coding	2.24462	2.57259	2.40833	2.63248	1.05117	2.16542	3.04764	3.4102	3.35267	2.38034	1.15018	2.02497
ENSMUSG00000002799	Jag2	12	-	112907819	112929776	jagged 2 [Source:MGI Symbol;Acc:MGI:1098270]	protein_coding	0.280768	0.015699	0.153974	1.62597	0.251364	1.61505	2.71577	1.63085	2.62643	1.19844	1.79306	1.40176
ENSMUSG00000002803	Btbd6	12	+	112976482	112978945	BTB (POZ) domain containing 6 [Source:MGI Symbol;Acc:MGI:3026623]	protein_coding	0.853889	1.92039	2.02265	2.97217	0.67847	0.842824	1.12806	1.38289	1.44296	0	0	0
ENSMUSG00000002804	Nudt14	12	-	112934291	112942124	nudix (nucleoside diphosphate linked moiety X)-type motif 14 [Source:MGI Symbol;Acc:MGI:1913424]	protein_coding	12.8337	17.0524	10.4672	18.7114	17.1946	7.02288	18.8054	11.7108	8.04656	13.2874	10.9228	5.493
ENSMUSG00000002808	Epdr1	13	-	19591706	19619927	ependymin related protein 1 (zebrafish) [Source:MGI Symbol;Acc:MGI:2145369]	protein_coding	0	0	0	0	0	0	0	0.061714	0.29731	0	0	0
ENSMUSG00000002812	Flii	11	-	60714123	60727263	flightless I actin binding protein [Source:MGI Symbol;Acc:MGI:1342286]	protein_coding	14.2832	12.3843	16.5709	13.6392	9.82809	11.1298	16.9002	21.5996	16.2691	10.9808	12.3892	14.4966
ENSMUSG00000002814	Top3a	11	-	60740058	60777365	topoisomerase (DNA) III alpha [Source:MGI Symbol;Acc:MGI:1197527]	protein_coding	1.87494	1.98773	1.56486	2.55988	0.926287	0.907032	3.15371	1.91587	2.80745	1.13939	3.2827	1.19199
ENSMUSG00000002820	Atg4d	9	+	21265293	21277772	autophagy related 4D, cysteine peptidase [Source:MGI Symbol;Acc:MGI:2444308]	protein_coding	4.55658	2.96193	3.88282	4.06921	5.48338	4.88406	3.88009	6.17191	4.32389	4.1839	3.92954	5.96572
ENSMUSG00000002825	Qtrt1	9	+	21411837	21420274	queuine tRNA-ribosyltransferase catalytic subunit 1 [Source:MGI Symbol;Acc:MGI:1931441]	protein_coding	12.7158	9.88454	9.54398	14.1506	10.6276	22.253	9.71291	10.8141	10.2975	6.44452	9.67526	8.42975
ENSMUSG00000002831	Plin4	17	-	56100591	56109803	perilipin 4 [Source:MGI Symbol;Acc:MGI:1929709]	protein_coding	0	0.001835	0.061154	0	0	0	0	0.05397	0	0	0	0
ENSMUSG00000002833	Hdgfl2	17	+	56079634	56100607	HDGF like 2 [Source:MGI Symbol;Acc:MGI:1194492]	protein_coding	9.08737	6.6244	11.8359	10.9077	10.2253	11.2106	34.2937	18.0879	16.5895	22.7111	14.6086	26.4825
ENSMUSG00000002835	Chaf1a	17	+	56040439	56072289	chromatin assembly factor 1, subunit A (p150) [Source:MGI Symbol;Acc:MGI:1351331]	protein_coding	2.99427	2.40348	3.78186	4.07374	5.34212	2.62	9.46664	9.92239	8.39288	13.7815	7.9682	6.83567
ENSMUSG00000002844	Adprh	16	-	38444030	38452703	ADP-ribosylarginine hydrolase [Source:MGI Symbol;Acc:MGI:1098234]	protein_coding	22.9508	18.663	19.1247	28.5721	20.7968	18.8194	8.86081	12.0096	9.36879	6.64994	6.00532	4.53891
ENSMUSG00000002845	Tmem39a	16	+	38558698	38592162	transmembrane protein 39a [Source:MGI Symbol;Acc:MGI:1915096]	protein_coding	10.6814	7.70041	7.94913	9.19413	19.0223	9.36847	13.5724	12.7324	11.3482	12.1333	5.35759	2.8849
ENSMUSG00000002846	Timmdc1	16	-	38498347	38522663	translocase of inner mitochondrial membrane domain containing 1 [Source:MGI Symbol;Acc:MGI:1922139]	protein_coding	3.88381	4.95287	1.91418	3.96757	5.47741	2.76514	5.41677	1.7977	3.9118	2.62772	5.94443	1.04663
ENSMUSG00000002847	Pla1a	16	-	38396117	38433145	phospholipase A1 member A [Source:MGI Symbol;Acc:MGI:1934677]	protein_coding	0.03907	0.223469	0.545448	0	2.34474	0.380651	0	0.370837	0	0.163835	0	0.603351
ENSMUSG00000002870	Mcm2	6	-	88883474	88898780	minichromosome maintenance complex component 2 [Source:MGI Symbol;Acc:MGI:105380]	protein_coding	15.2729	12.0711	11.094	20.4788	21.2089	18.2458	11.4001	14.6993	14.7449	6.23747	8.68378	7.52954
ENSMUSG00000002871	Tpra1	6	+	88902251	88912238	transmembrane protein, adipocyte asscociated 1 [Source:MGI Symbol;Acc:MGI:1345190]	protein_coding	11.6562	7.65324	9.61926	17.5948	14.5146	6.80668	8.04334	9.01821	4.55534	3.29508	2.93081	5.01961
ENSMUSG00000002881	Nab1	1	-	52457294	52500679	Ngfi-A binding protein 1 [Source:MGI Symbol;Acc:MGI:107564]	protein_coding	18.0968	14.6593	14.0147	25.1221	17.7	19.0522	13.9275	15.2851	15.7545	8.43864	8.05712	6.63395
ENSMUSG00000002885	Adgre5	8	-	83723251	83741326	adhesion G protein-coupled receptor E5 [Source:MGI Symbol;Acc:MGI:1347095]	protein_coding	90.1942	84.5702	106.264	48.1912	60.3257	52.0198	100.664	87.8757	67.5872	25.8381	22.636	24.8375
ENSMUSG00000002897	Il17ra	6	+	120463247	120487559	interleukin 17 receptor A [Source:MGI Symbol;Acc:MGI:107399]	protein_coding	38.6751	24.2857	35.519	12.1196	7.62169	8.67401	55.5826	52.0949	53.0212	36.1285	40.2169	56.5879
ENSMUSG00000002900	Lamb1	12	+	31265234	31329644	laminin B1 [Source:MGI Symbol;Acc:MGI:96743]	protein_coding	0.427357	0.201946	0.453419	0.784825	0.861229	0.579286	0.715716	0.973497	0.985682	1.00163	0.698736	1.68101
ENSMUSG00000002908	Kcnn1	8	-	70842049	70863258	potassium intermediate/small conductance calcium-activated channel, subfamily N, member 1 [Source:MGI Symbol;Acc:MGI:1933993]	protein_coding	0	0.040465	0	0.043582	0.160301	0.854152	0.585085	0.170714	0.208451	0.397815	0.501805	0.424556
ENSMUSG00000002910	Arrdc2	8	-	70835129	70839720	arrestin domain containing 2 [Source:MGI Symbol;Acc:MGI:1918057]	protein_coding	6.77531	6.60494	4.37722	7.16466	10.1125	2.97761	9.40102	10.945	6.32621	17.7828	5.07025	6.57571
ENSMUSG00000002930	Ppp1r17	6	+	56017497	56032689	protein phosphatase 1, regulatory subunit 17 [Source:MGI Symbol;Acc:MGI:1333876]	protein_coding	0	0	0	0	0	0	0	0	0	0	0	0
ENSMUSG00000002944	Cd36	5	-	17781690	17888801	CD36 molecule [Source:MGI Symbol;Acc:MGI:107899]	protein_coding	0	0.066848	0.412014	0	0	0.688634	0.257613	0.478946	0.48112	1.12801	2.45834	3.37005
ENSMUSG00000002948	Map2k7	8	+	4238740	4247897	mitogen-activated protein kinase kinase 7 [Source:MGI Symbol;Acc:MGI:1346871]	protein_coding	11.257	8.46532	13.4901	8.04511	8.08158	8.36038	32.534	42.2725	30.1799	33.1351	34.5733	56.6953
ENSMUSG00000002949	Timm44	8	-	4259731	4275913	translocase of inner mitochondrial membrane 44 [Source:MGI Symbol;Acc:MGI:1343262]	protein_coding	21.8851	23.3151	25.9507	24.1875	26.3227	26.8583	46.4065	40.5069	23.586	19.8227	25.6787	13.9779
ENSMUSG00000002957	Ap2a2	7	+	141562173	141633011	adaptor-related protein complex 2, alpha 2 subunit [Source:MGI Symbol;Acc:MGI:101920]	protein_coding	16.4826	13.686	18.5521	11.8294	15.9247	14.5774	28.5619	36.1797	33.1992	30.8504	25.4266	23.6418
ENSMUSG00000002963	Pnkp	7	+	44857139	44862992	polynucleotide kinase 3'- phosphatase [Source:MGI Symbol;Acc:MGI:1891698]	protein_coding	101.691	101.357	99.0869	79.7722	78.0019	64.2382	35.5631	39.9723	35.4668	32.4679	21.6333	23.946
ENSMUSG00000002968	Med25	7	-	44876765	44892712	mediator complex subunit 25 [Source:MGI Symbol;Acc:MGI:1922863]	protein_coding	15.459	11.0999	7.78626	17.1241	15.3987	11.4105	7.29442	8.61356	11.1664	3.62899	7.70886	3.31648
ENSMUSG00000002980	Bcam	7	-	19756131	19771016	basal cell adhesion molecule [Source:MGI Symbol;Acc:MGI:1929940]	protein_coding	0	0	0.067541	0	0	0	0	0	0	0	0	0
ENSMUSG00000002981	Clptm1	7	-	19631571	19665033	cleft lip and palate associated transmembrane protein 1 [Source:MGI Symbol;Acc:MGI:1927155]	protein_coding	14.9357	9.152	10.3341	16.0823	20.8766	16.3649	6.68832	9.49424	8.72464	6.90846	6.97075	4.44937
ENSMUSG00000002983	Relb	7	-	19606217	19629438	avian reticuloendotheliosis viral (v-rel) oncogene related B [Source:MGI Symbol;Acc:MGI:103289]	protein_coding	1.22718	2.46887	2.44809	3.66948	0.727646	2.08479	3.93885	3.94309	5.53582	2.88727	3.59544	1.9557
ENSMUSG00000002984	Tomm40	7	-	19701313	19715438	translocase of outer mitochondrial membrane 40 [Source:MGI Symbol;Acc:MGI:1858259]	protein_coding	19.5571	17.0763	13.255	56.2516	48.9246	50.4287	27.0773	33.1974	28.9959	27.7154	30.7087	14.8031
ENSMUSG00000002985	Apoe	7	-	19696109	19699188	apolipoprotein E [Source:MGI Symbol;Acc:MGI:88057]	protein_coding	163.178	187.679	178.568	28.0031	45.1124	24.795	38.6328	47.0455	45.6513	13.6259	9.1824	8.57048
ENSMUSG00000002992	Apoc2	7	-	19671579	19677941	apolipoprotein C-II [Source:MGI Symbol;Acc:MGI:88054]	protein_coding	128.894	163.93	172.352	18.0613	19.7319	27.9386	26.9391	20.5582	19.4135	8.66363	5.6691	0
ENSMUSG00000002996	Hbp1	12	-	31926254	31950535	high mobility group box transcription factor 1 [Source:MGI Symbol;Acc:MGI:894659]	protein_coding	90.5346	74.8815	70.5824	37.1239	45.7288	34.6917	10.2174	13.8077	11.2981	11.3851	10.0517	7.45335
ENSMUSG00000002997	Prkar2b	12	-	31958476	32061296	protein kinase, cAMP dependent regulatory, type II beta [Source:MGI Symbol;Acc:MGI:97760]	protein_coding	20.0587	19.1494	16.9572	13.3563	16.4989	12.9442	9.99769	8.39574	13.8093	7.10785	5.78621	11.507
ENSMUSG00000003031	Cdkn1b	6	+	134920401	134925513	cyclin-dependent kinase inhibitor 1B [Source:MGI Symbol;Acc:MGI:104565]	protein_coding	3.15796	3.50578	3.49412	3.68346	0.595753	1.33856	10.2056	5.39088	7.26625	7.28334	11.1714	4.28141
ENSMUSG00000003032	Klf4	4	-	55527143	55532466	Kruppel-like factor 4 (gut) [Source:MGI Symbol;Acc:MGI:1342287]	protein_coding	10.2447	10.5912	12.9149	9.36207	8.13559	6.6069	44.5362	35.8264	36.1246	19.9226	15.2867	19.7198
ENSMUSG00000003033	Ap1m1	8	+	72240018	72257385	adaptor-related protein complex AP-1, mu subunit 1 [Source:MGI Symbol;Acc:MGI:102776]	protein_coding	99.0789	93.0715	73.2907	71.2022	65.7381	69.4291	31.0564	30.0687	27.9052	11.6076	17.3204	4.73274
ENSMUSG00000003037	Rab8a	8	+	72161200	72183904	RAB8A, member RAS oncogene family [Source:MGI Symbol;Acc:MGI:96960]	protein_coding	59.8795	51.1507	42.556	40.146	35.5685	37.788	25.5323	32.148	25.5991	20.7734	14.7096	11.7803
ENSMUSG00000003038	Hmgn2	4	-	133964738	133968650	high mobility group nucleosomal binding domain 2 [Source:MGI Symbol;Acc:MGI:96136]	protein_coding	281.877	310.984	217.307	675.382	618.659	521.598	60.533	55.5677	52.3895	33.5883	37.9659	26.6753
ENSMUSG00000003039	Fam32a	8	+	72219730	72224418	family with sequence similarity 32, member A [Source:MGI Symbol;Acc:MGI:1915172]	protein_coding	134.232	138.847	134.583	110.146	96.3764	107.842	52.8556	63.7429	49.5181	40.887	43.2244	32.1132
ENSMUSG00000003051	Elf3	1	-	135253575	135258568	E74-like factor 3 [Source:MGI Symbol;Acc:MGI:1101781]	protein_coding	0	0	0	0.160997	0	0	0	0	0	0	0	0
ENSMUSG00000003053	Cyp2c29	19	+	39269405	39330713	cytochrome P450, family 2, subfamily c, polypeptide 29 [Source:MGI Symbol;Acc:MGI:103238]	protein_coding	0	0.754852	1.45552	0	0	0	0	0	0	0	0.380992	0
ENSMUSG00000003062	Stard3nl	13	-	19357676	19395795	STARD3 N-terminal like [Source:MGI Symbol;Acc:MGI:1923455]	protein_coding	57.3569	60.983	42.2629	41.9861	20.6393	22.5501	11.3645	6.66838	7.46561	5.59377	9.4023	0.876518
ENSMUSG00000003068	Stk11	10	+	80115803	80130682	serine/threonine kinase 11 [Source:MGI Symbol;Acc:MGI:1341870]	protein_coding	13.6283	9.94126	16.883	16.6861	10.4969	13.6296	44.5198	31.5743	41.1161	15.3917	68.1949	31.3922
ENSMUSG00000003070	Efna2	10	+	80179482	80190010	ephrin A2 [Source:MGI Symbol;Acc:MGI:102707]	protein_coding	0.032738	0.048269	0.547926	0	0.997741	0.806765	0.208844	0.2595	0.383913	0	0	1.95924
ENSMUSG00000003072	Atp5d	10	+	80138632	80145818	ATP synthase, H+ transporting, mitochondrial F1 complex, delta subunit [Source:MGI Symbol;Acc:MGI:1913293]	protein_coding	100.197	116.546	117.138	143.042	162.039	171.174	86.5519	112.462	90.5017	63.4347	89.6349	91.6133
ENSMUSG00000003099	Ppp5c	7	-	17004640	17027924	protein phosphatase 5, catalytic subunit [Source:MGI Symbol;Acc:MGI:102666]	protein_coding	15.1431	14.8527	12.8305	23.4931	20.0586	20.2548	14.4047	11.4365	10.1064	7.80154	5.71838	11.1541
ENSMUSG00000003119	Cdk12	11	+	98203059	98278504	cyclin-dependent kinase 12 [Source:MGI Symbol;Acc:MGI:1098802]	protein_coding	7.69174	7.05214	7.95282	4.28778	4.40807	8.20308	18.3942	18.6395	19.0148	16.949	13.1983	16.7545
ENSMUSG00000003123	Lipe	7	-	25379527	25398710	lipase, hormone sensitive [Source:MGI Symbol;Acc:MGI:96790]	protein_coding	1.41162	1.19189	1.35663	1.01539	1.35593	2.43079	0.970751	1.6132	1.65608	0.932423	0.461249	2.09339
ENSMUSG00000003131	Pafah1b2	9	-	45962859	46012690	platelet-activating factor acetylhydrolase, isoform 1b, subunit 2 [Source:MGI Symbol;Acc:MGI:108415]	protein_coding	10.6366	9.30343	7.96717	9.93136	11.2295	10.3086	3.68599	4.0391	4.72796	8.24645	4.52884	1.81775
ENSMUSG00000003134	Tbc1d8	1	-	39371492	39478755	TBC1 domain family, member 8 [Source:MGI Symbol;Acc:MGI:1927225]	protein_coding	28.0589	24.0226	27.8712	17.4951	27.5049	22.0159	16.1266	13.0818	12.4036	7.68801	5.04678	9.20827
ENSMUSG00000003135	Cnot11	1	+	39534992	39546889	CCR4-NOT transcription complex, subunit 11 [Source:MGI Symbol;Acc:MGI:106580]	protein_coding	6.13838	4.46435	5.77547	13.348	7.68951	9.61837	4.70434	6.05992	7.03833	3.32495	8.76788	4.28939
ENSMUSG00000003153	Slc2a3	6	-	122727809	122801640	solute carrier family 2 (facilitated glucose transporter), member 3 [Source:MGI Symbol;Acc:MGI:95757]	protein_coding	4.45846	2.64451	3.02708	1.56392	4.0627	2.21413	0.242165	0.421633	0.691147	0	0.196852	0.742024
ENSMUSG00000003154	Foxj2	6	+	122819914	122845366	forkhead box J2 [Source:MGI Symbol;Acc:MGI:1926805]	protein_coding	4.04859	3.90016	3.89898	0.717829	1.44244	2.25267	4.33425	2.32633	4.51312	5.15001	4.32699	1.28926
ENSMUSG00000003161	Sri	5	+	8046078	8069379	sorcin [Source:MGI Symbol;Acc:MGI:98419]	protein_coding	202.664	209.688	191.443	210.951	185.469	187.148	53.1886	44.6421	54.5273	29.3494	29.4025	30.9208
ENSMUSG00000003166	Dgcr2	16	-	17839482	17898562	DiGeorge syndrome critical region gene 2 [Source:MGI Symbol;Acc:MGI:892866]	protein_coding	5.78023	4.69205	4.07205	8.57197	9.37609	5.7519	3.4822	2.20185	2.49409	0.92649	3.33064	1.76112
ENSMUSG00000003184	Irf3	7	+	44997648	45002848	interferon regulatory factor 3 [Source:MGI Symbol;Acc:MGI:1859179]	protein_coding	19.385	19.4133	24.8079	17.1843	18.3663	17.9919	37.1305	51.1731	26.0138	20.7866	22.4362	17.38
ENSMUSG00000003190	Bcl2l12	7	-	44991222	44998712	BCL2-like 12 (proline rich) [Source:MGI Symbol;Acc:MGI:1922986]	protein_coding	8.70905	9.19395	7.91414	14.2004	24.8898	19.0508	7.17112	5.44767	3.15971	6.40763	5.72591	1.91837
ENSMUSG00000003198	Zfp959	17	+	55892093	55898928	zinc finger protein 959 [Source:MGI Symbol;Acc:MGI:2385058]	protein_coding	10.0842	7.03116	6.07059	0.634069	6.6596	5.79168	1.95807	1.92554	2.15521	3.25449	3.19317	0.979736
ENSMUSG00000003199	Mpnd	17	+	56005711	56016790	MPN domain containing [Source:MGI Symbol;Acc:MGI:1915297]	protein_coding	51.1904	41.9743	41.2929	47.7908	33.5477	31.2876	25.3366	27.8804	21.3831	30.3161	24.9747	37.3414
ENSMUSG00000003200	Sh3gl1	17	-	56016750	56036635	SH3-domain GRB2-like 1 [Source:MGI Symbol;Acc:MGI:700010]	protein_coding	27.4804	25.2816	22.7462	23.9006	29.1685	26.3217	11.3597	17.5762	14.6723	12.355	7.04017	6.58198
ENSMUSG00000003206	Ebi3	17	+	55952640	55957022	Epstein-Barr virus induced gene 3 [Source:MGI Symbol;Acc:MGI:1354171]	protein_coding	19.5109	21.9639	16.5949	9.45676	9.45406	19.4495	13.8731	13.6906	14.6669	4.17918	10.0029	24.8904
ENSMUSG00000003208	Yju2	17	+	55959099	55968285	YJU2 splicing factor [Source:MGI Symbol;Acc:MGI:1920136]	protein_coding	11.5859	7.17407	7.21456	10.3705	5.49968	3.79787	7.1632	8.03193	6.76232	3.76954	3.18211	4.30677
ENSMUSG00000003226	Ranbp2	10	+	58446920	58494356	RAN binding protein 2 [Source:MGI Symbol;Acc:MGI:894323]	protein_coding	16.5631	12.089	9.12856	13.4884	10.893	10.7408	23.4701	23.0075	22.6261	14.0837	10.7578	14.1679
ENSMUSG00000003227	Edar	10	-	58600789	58675654	ectodysplasin-A receptor [Source:MGI Symbol;Acc:MGI:1343498]	protein_coding	0	0	0	0	0	0	0	0	0.100086	0	0	0.495087
ENSMUSG00000003228	Grk5	19	+	60889749	61095968	G protein-coupled receptor kinase 5 [Source:MGI Symbol;Acc:MGI:109161]	protein_coding	6.74972	4.36529	6.27836	2.9878	1.3317	2.43725	5.42999	6.2953	6.0079	3.26871	6.53728	1.74829
ENSMUSG00000003233	Dvl3	16	+	20516982	20534010	dishevelled segment polarity protein 3 [Source:MGI Symbol;Acc:MGI:108100]	protein_coding	6.91107	3.62276	4.06687	4.98759	4.71812	4.15962	3.84554	3.74977	4.12669	1.87538	3.49121	4.86072
ENSMUSG00000003234	Abcf3	16	+	20548577	20561379	ATP-binding cassette, sub-family F (GCN20), member 3 [Source:MGI Symbol;Acc:MGI:1351656]	protein_coding	12.1647	6.0936	8.02773	9.65585	12.1656	13.2834	7.05524	6.51851	9.71191	4.06442	6.5878	3.80875
ENSMUSG00000003235	Eif2b5	16	+	20498817	20509323	eukaryotic translation initiation factor 2B, subunit 5 epsilon [Source:MGI Symbol;Acc:MGI:2446176]	protein_coding	16.0076	10.3766	12.7708	25.3892	10.2104	10.8209	17.3918	17.5246	15.2355	19.9223	17.4033	15.4827
ENSMUSG00000003269	Cyth2	7	-	45806637	45814581	cytohesin 2 [Source:MGI Symbol;Acc:MGI:1334255]	protein_coding	16.1507	15.0865	18.291	19.1708	15.2215	15.5623	15.5309	17.6302	13.9949	8.64268	9.33263	9.45391
ENSMUSG00000003271	Sult2b1	7	-	45729983	45784669	sulfotransferase family, cytosolic, 2B, member 1 [Source:MGI Symbol;Acc:MGI:1926342]	protein_coding	0	0.445438	0.192351	0	1.75761	1.20809	0	0	0	0	0	0
ENSMUSG00000003273	Car11	7	+	45699843	45704682	carbonic anhydrase 11 [Source:MGI Symbol;Acc:MGI:1336193]	protein_coding	0	0	0	0	0	0	0.449432	0.304711	0	0	0.22959	0
ENSMUSG00000003279	Dlgap1	17	+	69969073	70821413	DLG associated protein 1 [Source:MGI Symbol;Acc:MGI:1346065]	protein_coding	0.039237	0.116044	0.176433	0.116865	0	0.191022	0.05657	0.900095	1.20803	3.90549	1.42371	7.28014
ENSMUSG00000003282	Plag1	4	-	3900996	3938423	pleiomorphic adenoma gene 1 [Source:MGI Symbol;Acc:MGI:1891916]	protein_coding	0	0	0	0	0	0	0.18591	0.215195	0.356274	0.624973	0.220302	0.558866
ENSMUSG00000003283	Hck	2	+	153108468	153151441	hemopoietic cell kinase [Source:MGI Symbol;Acc:MGI:96052]	protein_coding	9.56082	8.3978	13.2523	3.12888	6.31758	0.830015	13.9527	16.9262	9.78023	4.58695	6.56061	3.86561
ENSMUSG00000003299	Mrpl4	9	+	21002738	21008839	mitochondrial ribosomal protein L4 [Source:MGI Symbol;Acc:MGI:2137210]	protein_coding	34.3067	34.9876	26.9511	53.3035	45.6055	44.7849	14.3479	17.2155	14.3122	12.6197	5.23645	6.82434
ENSMUSG00000003308	Keap1	9	-	21229730	21239361	kelch-like ECH-associated protein 1 [Source:MGI Symbol;Acc:MGI:1858732]	protein_coding	9.43273	7.98005	9.0536	7.57435	7.91368	6.36449	19.9288	18.783	19.6863	15.4549	9.55455	19.5592
ENSMUSG00000003309	Ap1m2	9	-	21294275	21312337	adaptor protein complex AP-1, mu 2 subunit [Source:MGI Symbol;Acc:MGI:1336974]	protein_coding	1.23453	1.95816	1.60616	0	1.16661	1.11157	3.4547	5.60236	1.32944	1.87578	0	0
ENSMUSG00000003316	Glg1	8	-	111154421	111259216	golgi apparatus protein 1 [Source:MGI Symbol;Acc:MGI:104967]	protein_coding	14.5157	8.72811	10.3166	11.1488	7.57301	10.1713	12.9833	17.3891	13.8086	10.3747	10.2859	8.81705
ENSMUSG00000003341	Atp8b3	10	-	80519584	80539124	ATPase, class I, type 8B, member 3 [Source:MGI Symbol;Acc:MGI:1914581]	protein_coding	0	0	0	0	0	0.390447	0	0.171809	0.121076	0	0	0.130496
ENSMUSG00000003344	Btbd2	10	-	80642617	80657071	BTB (POZ) domain containing 2 [Source:MGI Symbol;Acc:MGI:1933831]	protein_coding	3.20574	4.30079	4.9306	5.22763	8.31509	3.63444	3.27843	7.36999	3.5042	1.90081	6.96537	10.7128
ENSMUSG00000003345	Csnk1g2	10	+	80622838	80640749	casein kinase 1, gamma 2 [Source:MGI Symbol;Acc:MGI:1920014]	protein_coding	22.5445	22.7034	17.6827	27.3731	13.9126	22.8522	38.4874	45.1262	28.7207	37.5429	47.3751	39.7425
ENSMUSG00000003346	Abhd17a	10	-	80583654	80590341	abhydrolase domain containing 17A [Source:MGI Symbol;Acc:MGI:106388]	protein_coding	33.4501	36.3253	33.4074	66.5429	64.5455	68.1376	42.1307	46.4533	39.9121	44.039	32.6095	26.0662
ENSMUSG00000003348	Mob3a	10	-	80685253	80701977	MOB kinase activator 3A [Source:MGI Symbol;Acc:MGI:3050117]	protein_coding	37.7154	27.239	27.3688	23.5393	28.1107	32.0847	9.13095	14.9481	10.4064	3.75355	4.43639	4.91922
ENSMUSG00000003352	Cacnb3	15	+	98630840	98644529	calcium channel, voltage-dependent, beta 3 subunit [Source:MGI Symbol;Acc:MGI:103307]	protein_coding	0	0	0.055816	0.034769	0	0	0	0.114864	0.099857	0	0.247548	0
ENSMUSG00000003354	Ccdc65	15	+	98708207	98723336	coiled-coil domain containing 65 [Source:MGI Symbol;Acc:MGI:2146001]	protein_coding	0.27423	0	0.188028	1.62662	0	0	0	0	0.144168	0.580823	0.689928	0
ENSMUSG00000003355	Fkbp11	15	-	98724366	98728198	FK506 binding protein 11 [Source:MGI Symbol;Acc:MGI:1913370]	protein_coding	26.9981	28.2084	30.6409	169.696	162.108	134.91	29.7345	25.1463	17.8746	31.1881	29.7582	21.5955
ENSMUSG00000003360	Ddx23	15	-	98645134	98662894	DEAD (Asp-Glu-Ala-Asp) box polypeptide 23 [Source:MGI Symbol;Acc:MGI:1921601]	protein_coding	7.93531	7.60789	8.71293	10.3072	6.54537	8.19867	13.379	9.78162	14.5678	9.90142	16.9123	11.439
ENSMUSG00000003363	Pld3	7	-	27532000	27553218	phospholipase D family, member 3 [Source:MGI Symbol;Acc:MGI:1333782]	protein_coding	6.52541	6.1486	7.82068	7.76341	8.04665	9.19272	7.01617	9.70703	8.60541	1.06771	9.11936	4.63924
ENSMUSG00000003378	Grik5	7	-	25009849	25072346	glutamate receptor, ionotropic, kainate 5 (gamma 2) [Source:MGI Symbol;Acc:MGI:95818]	protein_coding	0.806166	1.08609	0.882946	0.221317	1.2499	1.1782	2.57334	1.39301	1.88938	1.60638	1.5359	3.88431
ENSMUSG00000003379	Cd79a	7	+	24897381	24902197	CD79A antigen (immunoglobulin-associated alpha) [Source:MGI Symbol;Acc:MGI:101774]	protein_coding	0.240831	0.082716	0.303997	0.089611	0	2.95484	0	0.1318	0	0	0	0
ENSMUSG00000003380	Rabac1	7	-	24969752	24972754	Rab acceptor 1 (prenylated) [Source:MGI Symbol;Acc:MGI:1201692]	protein_coding	188.769	282.864	268.192	288.04	321.162	305.783	140.412	168.505	136.318	101.333	105.441	107.05
ENSMUSG00000003382	Etv3	3	+	87525407	87540156	ets variant 3 [Source:MGI Symbol;Acc:MGI:1350926]	protein_coding	2.94104	4.14965	2.78869	2.85374	3.46459	3.41502	4.33502	3.22161	5.38593	1.7952	3.84885	1.90019
ENSMUSG00000003402	Prkcsh	9	+	22002806	22014222	protein kinase C substrate 80K-H [Source:MGI Symbol;Acc:MGI:107877]	protein_coding	22.7644	16.9184	27.8358	40.1332	38.1663	39.8766	31.6215	42.7465	34.5453	30.8876	31.1	27.4496
ENSMUSG00000003410	Elavl3	9	-	22015005	22052023	ELAV like RNA binding protein 3 [Source:MGI Symbol;Acc:MGI:109157]	protein_coding	0	0	0.013192	0	0	0	0.293134	0.455846	0.555748	1.91645	0.828453	3.74781
ENSMUSG00000003411	Rab3b	4	+	108879063	108943324	RAB3B, member RAS oncogene family [Source:MGI Symbol;Acc:MGI:1917158]	protein_coding	0	0	0	0.194196	0	0	0	0	0.219097	0	0	0.648956
ENSMUSG00000003418	St8sia6	2	-	13651021	13794064	ST8 alpha-N-acetyl-neuraminide alpha-2,8-sialyltransferase 6 [Source:MGI Symbol;Acc:MGI:2386797]	protein_coding	0.011979	0	0.018667	0.013643	0.004455	0	0.266328	0.259847	0.220042	0.690425	1.69288	3.77222
ENSMUSG00000003420	Fcgrt	7	-	45092990	45103851	Fc receptor, IgG, alpha chain transporter [Source:MGI Symbol;Acc:MGI:103017]	protein_coding	1.7144	2.91746	3.27563	1.83539	4.14113	0.274841	0	1.90841	1.1414	2.42741	3.72637	4.90053
ENSMUSG00000003421	Nosip	7	+	45062429	45078210	nitric oxide synthase interacting protein [Source:MGI Symbol;Acc:MGI:1913644]	protein_coding	20.2215	19.0871	18.0039	21.9212	22.9238	26.7299	15.1274	15.2909	12.9469	10.0591	13.7224	13.0525
ENSMUSG00000003423	Pih1d1	7	+	45154303	45160065	PIH1 domain containing 1 [Source:MGI Symbol;Acc:MGI:1916095]	protein_coding	38.778	39.866	37.1303	49.2528	49.4437	44.2715	45.905	49.8025	36.9988	62.3862	53.4165	32.6232
ENSMUSG00000003429	Rps11	7	-	45122379	45124439	ribosomal protein S11 [Source:MGI Symbol;Acc:MGI:1351329]	protein_coding	547.527	795.294	850.513	971.512	1006.7	1056.9	767.51	960.048	830.386	358.256	451.432	251.618
ENSMUSG00000003435	Supt5	7	-	28314891	28338746	suppressor of Ty 5, DSIF elongation factor subunit [Source:MGI Symbol;Acc:MGI:1202400]	protein_coding	21.9327	14.6618	19.4969	20.9151	17.6546	19.831	29.9289	33.6744	30.4756	31.7717	31.035	32.2965
ENSMUSG00000003436	Dll3	7	-	28293553	28302238	delta like canonical Notch ligand 3 [Source:MGI Symbol;Acc:MGI:1096877]	protein_coding	0	0	0	0	0	0.081895	0	0	0	0	0	0
ENSMUSG00000003437	Paf1	7	+	28392951	28399388	Paf1, RNA polymerase II complex component [Source:MGI Symbol;Acc:MGI:1923988]	protein_coding	26.8789	19.8847	26.7524	14.5919	19.0995	13.6099	28.2361	26.9214	27.1786	23.868	33.4104	20.1138
ENSMUSG00000003438	Timm50	7	-	28305516	28312072	translocase of inner mitochondrial membrane 50 [Source:MGI Symbol;Acc:MGI:1913775]	protein_coding	29.0256	28.0164	22.2027	54.9861	45.7876	47.6291	16.4543	24.6431	19.4213	24.199	17.5489	16.44
ENSMUSG00000003444	Med29	7	-	28386146	28392708	mediator complex subunit 29 [Source:MGI Symbol;Acc:MGI:1914474]	protein_coding	19.5784	21.0109	19.5682	23.7033	27.7031	36.3097	13.4155	10.1289	10.5751	3.06171	7.77654	6.14254
ENSMUSG00000003452	Bicd1	6	+	149408886	149563329	BICD cargo adaptor 1 [Source:MGI Symbol;Acc:MGI:1101760]	protein_coding	0.133815	0.16897	0.121764	0.307088	0.680069	1.03433	0.661214	1.11761	1.18934	1.38025	2.68187	8.34265
ENSMUSG00000003458	Ncstn	1	-	172066013	172082795	nicastrin [Source:MGI Symbol;Acc:MGI:1891700]	protein_coding	46.2376	32.0921	22.868	36.5097	45.7746	36.4448	12.0352	13.313	9.84759	9.28367	6.75812	7.60289
ENSMUSG00000003464	Pex19	1	+	172126755	172136493	peroxisomal biogenesis factor 19 [Source:MGI Symbol;Acc:MGI:1334458]	protein_coding	15.823	7.96801	8.23338	11.3578	12.7268	15.512	3.3498	2.86656	2.10256	5.4376	5.80993	1.41049
ENSMUSG00000003469	Phyhip	14	+	70457476	70468832	phytanoyl-CoA hydroxylase interacting protein [Source:MGI Symbol;Acc:MGI:1860417]	protein_coding	0	0	0	0	0	0	0	0.11447	0.57815	0	0	0
ENSMUSG00000003476	Crhr2	6	-	55090049	55133016	corticotropin releasing hormone receptor 2 [Source:MGI Symbol;Acc:MGI:894312]	protein_coding	0	0	0	0	0	0	0	0	0	0	0	0
ENSMUSG00000003477	Inmt	6	-	55170626	55175043	indolethylamine N-methyltransferase [Source:MGI Symbol;Acc:MGI:102963]	protein_coding	0	0.686887	0.157589	0	0	0	0	0	0.104966	0	0	0
ENSMUSG00000003484	Cyp4f18	8	-	71988482	72009626	cytochrome P450, family 4, subfamily f, polypeptide 18 [Source:MGI Symbol;Acc:MGI:1919304]	protein_coding	255.106	167.004	160.224	34.3895	22.1766	36.6065	6.09926	10.2805	7.83	4.92035	4.86573	5.74079
ENSMUSG00000003500	Impdh1	6	-	29200434	29216364	inosine monophosphate dehydrogenase 1 [Source:MGI Symbol;Acc:MGI:96567]	protein_coding	3.56896	3.45187	2.01771	4.62756	7.83625	5.35143	3.30658	2.29766	3.06156	2.09987	3.53296	5.2243
ENSMUSG00000003505	Psg18	7	-	18345422	18355009	pregnancy specific glycoprotein 18 [Source:MGI Symbol;Acc:MGI:1347251]	protein_coding	0	0	0	0	0	0	0	0	0	0	0	0
ENSMUSG00000003518	Dusp3	11	-	101971143	101987013	dual specificity phosphatase 3 (vaccinia virus phosphatase VH1-related) [Source:MGI Symbol;Acc:MGI:1919599]	protein_coding	0.427285	0.279131	0.463316	0.410741	0.992425	0.124739	2.18054	2.00921	2.28112	1.10286	1.277	1.6682
ENSMUSG00000003526	Prodh	16	-	18060357	18090203	proline dehydrogenase [Source:MGI Symbol;Acc:MGI:97770]	protein_coding	5.45376	3.68121	4.83457	8.01965	8.67834	8.67032	4.04661	2.34919	4.68282	1.11081	6.77546	2.48005
ENSMUSG00000003527	Ess2	16	-	17900709	17911348	ess-2 splicing factor [Source:MGI Symbol;Acc:MGI:107854]	protein_coding	7.77561	5.75646	6.76188	13.494	8.3187	8.10624	2.99527	3.4018	3.67774	4.11424	0.408	1.26659
ENSMUSG00000003528	Slc25a1	16	-	17925223	17928219	solute carrier family 25 (mitochondrial carrier, citrate transporter), member 1 [Source:MGI Symbol;Acc:MGI:1345283]	protein_coding	19.8919	26.0192	24.5169	33.1884	37.3218	38.4131	18.7462	22.408	17.893	9.98145	14.1125	11.4903
ENSMUSG00000003531	Dgcr6	16	+	18052860	18071632	DiGeorge syndrome critical region gene 6 [Source:MGI Symbol;Acc:MGI:1202877]	protein_coding	32.8114	29.5898	33.0508	51.9836	50.6426	43.1109	16.2816	15.3873	13.6492	13.7455	24.4452	6.5927
ENSMUSG00000003534	Ddr1	17	-	35681567	35704621	discoidin domain receptor family, member 1 [Source:MGI Symbol;Acc:MGI:99216]	protein_coding	0	0	0	0	0.019272	0	0	0.13585	0.263131	0	0	0.165739
ENSMUSG00000003541	Ier3	17	+	35821684	35822923	immediate early response 3 [Source:MGI Symbol;Acc:MGI:104814]	protein_coding	174.403	171.85	200.992	112.181	90.642	104.549	178.066	172.801	171.681	68.4261	81.9049	71.6914
ENSMUSG00000003545	Fosb	7	-	19302696	19310051	FBJ osteosarcoma oncogene B [Source:MGI Symbol;Acc:MGI:95575]	protein_coding	15.678	17.6519	16.238	8.5982	7.20102	16.5016	22.1774	20.3374	21.0692	14.8589	14.4318	16.1632
ENSMUSG00000003546	Klc4	17	-	46630624	46646022	kinesin light chain 4 [Source:MGI Symbol;Acc:MGI:1922014]	protein_coding	33.5848	27.0941	30.2978	14.7859	12.0607	13.3927	12.317	15.784	8.88314	3.23554	3.11497	2.27697
ENSMUSG00000003549	Ercc1	7	+	19344778	19356524	excision repair cross-complementing rodent repair deficiency, complementation group 1 [Source:MGI Symbol;Acc:MGI:95412]	protein_coding	15.3814	18.6022	17.0978	14.9876	14.8581	10.0358	7.59214	4.60127	4.87858	1.77311	5.33087	1.04666
ENSMUSG00000003555	Cyp17a1	19	-	46667165	46673172	cytochrome P450, family 17, subfamily a, polypeptide 1 [Source:MGI Symbol;Acc:MGI:88586]	protein_coding	0	0	0	0	0	0.112809	0	0	0	0	0	0
ENSMUSG00000003559	As3mt	19	+	46707458	46741099	arsenic (+3 oxidation state) methyltransferase [Source:MGI Symbol;Acc:MGI:1929882]	protein_coding	12.4381	13.1881	11.8642	17.4916	20.8612	20.1954	7.73852	4.17975	3.97418	6.3504	4.16142	10.2308
ENSMUSG00000003573	Homer3	8	+	70282827	70294361	homer scaffolding protein 3 [Source:MGI Symbol;Acc:MGI:1347359]	protein_coding	2.47043	2.12191	3.79242	2.18052	3.25217	1.49798	2.5795	1.78014	2.07728	0	8.80677	0.526105
ENSMUSG00000003575	Crtc1	8	-	70382355	70439579	CREB regulated transcription coactivator 1 [Source:MGI Symbol;Acc:MGI:2142523]	protein_coding	1.70809	0.846012	1.2292	0.364591	2.00453	3.01016	1.08114	1.08059	0.935425	0.627633	0.566	0.593514
ENSMUSG00000003581	Rnf215	11	+	4135202	4141172	ring finger protein 215 [Source:MGI Symbol;Acc:MGI:1918923]	protein_coding	4.8262	5.51126	4.45391	3.74659	11.9077	9.82022	3.1527	4.26066	3.59924	5.41922	5.33178	1.88284
ENSMUSG00000003585	Sec14l2	11	-	4097039	4123415	SEC14-like lipid binding 2 [Source:MGI Symbol;Acc:MGI:1915065]	protein_coding	0.533135	1.34132	1.00719	1.4834	0.431984	0.328029	0.616656	0.972718	0.311645	0.300298	0	0.868183
ENSMUSG00000003604	Aven	2	+	112492964	112634573	apoptosis, caspase activation inhibitor [Source:MGI Symbol;Acc:MGI:1921518]	protein_coding	2.04567	2.09515	2.33311	9.15482	4.31558	2.11764	2.77213	3.34632	3.77202	2.55368	4.79279	1.63495
ENSMUSG00000003617	Cp	3	+	19957054	20009145	ceruloplasmin [Source:MGI Symbol;Acc:MGI:88476]	protein_coding	0.326947	0.47483	0.281454	0.042782	0.338506	0.102593	0.184198	3.30105	2.05819	3.38019	2.60209	1.13505
ENSMUSG00000003623	Crot	5	-	8966033	8997324	carnitine O-octanoyltransferase [Source:MGI Symbol;Acc:MGI:1921364]	protein_coding	17.7649	17.0879	14.0639	11.3586	16.1963	13.929	7.82227	8.17266	5.69747	7.14887	6.09916	11.805
ENSMUSG00000003644	Rps6ka1	4	-	133847290	133887797	ribosomal protein S6 kinase polypeptide 1 [Source:MGI Symbol;Acc:MGI:104558]	protein_coding	26.1199	20.1957	25.115	25.5767	25.6357	25.4711	14.2188	15.5669	15.2014	15.6543	9.50243	5.90089
ENSMUSG00000003657	Calb2	8	-	110137502	110168210	calbindin 2 [Source:MGI Symbol;Acc:MGI:101914]	protein_coding	0	0	0	0	0	0	0	0.724951	0.931654	0	0	0
ENSMUSG00000003660	Snrnp200	2	+	127208386	127240451	small nuclear ribonucleoprotein 200 (U5) [Source:MGI Symbol;Acc:MGI:2444401]	protein_coding	7.79379	6.15731	7.06567	6.31328	6.50751	6.40704	7.80049	9.84354	6.04516	5.71867	6.08922	3.97208
ENSMUSG00000003662	Ciao1	2	-	127240938	127247816	cytosolic iron-sulfur protein assembly 1 [Source:MGI Symbol;Acc:MGI:1346998]	protein_coding	6.48206	6.68446	7.94438	11.5237	10.2561	13.7833	4.50531	4.44424	2.14704	1.03513	3.29858	1.66738
ENSMUSG00000003665	Has1	17	-	17843323	17855205	hyaluronan synthase 1 [Source:MGI Symbol;Acc:MGI:106590]	protein_coding	0	0	0	0	0	0	0	0.14149	0.13184	0	0	0.179068
ENSMUSG00000003680	Taf6l	19	-	8774487	8786417	TATA-box binding protein associated factor 6 like [Source:MGI Symbol;Acc:MGI:2444957]	protein_coding	6.35564	3.85162	3.8117	3.55641	5.55091	4.73128	3.72507	2.44453	3.13998	5.63468	3.31519	2.39068
ENSMUSG00000003721	Insig2	1	-	121304353	121332589	insulin induced gene 2 [Source:MGI Symbol;Acc:MGI:1920249]	protein_coding	12.2287	12.1444	8.83405	7.38694	16.1174	10.2044	5.31918	7.0979	6.23998	3.47395	3.45112	6.1716
ENSMUSG00000003731	Kpna6	4	-	129643980	129672767	karyopherin (importin) alpha 6 [Source:MGI Symbol;Acc:MGI:1100836]	protein_coding	1.62184	1.27087	1.51324	3.09842	1.56744	2.88265	2.51953	2.0516	2.90005	0.893806	1.15342	3.70607
ENSMUSG00000003746	Man1a	10	-	53904785	54076609	mannosidase 1, alpha [Source:MGI Symbol;Acc:MGI:104677]	protein_coding	6.62294	3.93878	4.64193	4.51028	2.93344	8.37625	5.98417	4.77736	4.5415	3.31532	3.25849	7.71035
ENSMUSG00000003752	Itpkc	7	-	27207172	27228661	inositol 1,4,5-trisphosphate 3-kinase C [Source:MGI Symbol;Acc:MGI:2442554]	protein_coding	0.491602	0.097747	0.162822	0.602421	0.188357	0.419636	0.334711	0.087551	0	0.052065	0.098221	0.067037
ENSMUSG00000003762	Coq8b	7	+	27233023	27257950	coenzyme Q8B [Source:MGI Symbol;Acc:MGI:1924139]	protein_coding	9.69901	6.57842	9.37528	15.3801	7.4033	19.426	4.8872	4.79297	7.07535	4.14916	1.73375	2.46473
ENSMUSG00000003778	Brd8	18	-	34598615	34624601	bromodomain containing 8 [Source:MGI Symbol;Acc:MGI:1925906]	protein_coding	18.6095	14.8371	18.3636	17.757	17.0485	9.63503	28.7606	29.8064	27.1711	19.1009	20.6954	11.7053
ENSMUSG00000003779	Kif20a	18	+	34624613	34633277	kinesin family member 20A [Source:MGI Symbol;Acc:MGI:1201682]	protein_coding	10.9842	7.077	5.99808	12.5075	5.2336	6.00952	4.34791	4.90946	5.14203	0	4.80679	0
ENSMUSG00000003808	Farsa	8	+	84856989	84869257	phenylalanyl-tRNA synthetase, alpha subunit [Source:MGI Symbol;Acc:MGI:1913840]	protein_coding	36.6229	31.7856	35.5472	72.9004	43.4613	70.7648	45.3882	34.6692	31.1689	53.6124	47.1881	40.0807
ENSMUSG00000003809	Gcdh	8	-	84886393	84893921	glutaryl-Coenzyme A dehydrogenase [Source:MGI Symbol;Acc:MGI:104541]	protein_coding	3.26416	1.77721	2.10543	4.43062	4.94083	4.49216	1.82612	4.35386	2.46301	1.97485	4.92397	2.00831
ENSMUSG00000003810	Mast2	4	-	116306762	116464183	microtubule associated serine/threonine kinase 2 [Source:MGI Symbol;Acc:MGI:894676]	protein_coding	2.788	2.38829	3.3875	2.10483	1.40202	0.582635	4.03731	7.47175	5.53275	2.51917	2.70939	2.13161
ENSMUSG00000003812	Dnase2a	8	+	84908560	84922915	deoxyribonuclease II alpha [Source:MGI Symbol;Acc:MGI:1329019]	protein_coding	18.7543	18.7261	24.1291	18.4917	21.284	31.4863	11.4303	8.40774	13.2105	9.18859	12.7666	9.87334
ENSMUSG00000003813	Rad23a	8	-	84834019	84840665	RAD23 homolog A, nucleotide excision repair protein [Source:MGI Symbol;Acc:MGI:105126]	protein_coding	43.646	36.5741	28.8807	42.7103	40.106	30.902	13.9839	9.48643	10.9663	8.02277	9.40517	3.71428
ENSMUSG00000003814	Calr	8	-	84841850	84846934	calreticulin [Source:MGI Symbol;Acc:MGI:88252]	protein_coding	164.034	152.619	148.979	256.494	221.703	204.143	417.268	420.786	393.041	297.531	294.599	320.791
ENSMUSG00000003824	Syce2	8	+	84872111	84888221	synaptonemal complex central element protein 2 [Source:MGI Symbol;Acc:MGI:1919096]	protein_coding	8.16045	10.4464	11.9407	30.9322	32.5857	22.9208	28.3429	33.2294	35.1529	12.5398	27.3896	24.2498
ENSMUSG00000003847	Nfat5	8	+	107293470	107379517	nuclear factor of activated T cells 5 [Source:MGI Symbol;Acc:MGI:1859333]	protein_coding	5.64788	4.00136	4.34292	3.09424	2.66034	4.31552	7.58381	6.02004	7.06256	3.14634	2.91384	3.69077
ENSMUSG00000003848	Nob1	8	-	107412486	107425051	NIN1/RPN12 binding protein 1 homolog [Source:MGI Symbol;Acc:MGI:1914869]	protein_coding	18.8355	16.516	15.9833	32.5295	34.0142	35.8112	14.8054	17.1817	16.6976	12.3866	7.67874	7.3078
ENSMUSG00000003849	Nqo1	8	-	107388225	107403206	NAD(P)H dehydrogenase, quinone 1 [Source:MGI Symbol;Acc:MGI:103187]	protein_coding	0.464208	2.89552	1.01079	1.09275	1.39869	2.99263	0.27282	1.40898	1.2376	0.850347	0.343492	0.506427
ENSMUSG00000003863	Ppfia3	7	-	45339122	45367019	protein tyrosine phosphatase, receptor type, f polypeptide (PTPRF), interacting protein (liprin), alpha 3 [Source:MGI Symbol;Acc:MGI:1924037]	protein_coding	0.024679	0.049329	0.01192	0	0	0	0.21345	0.038361	0.827748	0	0.72403	0
ENSMUSG00000003865	Gys1	7	+	45434844	45456619	glycogen synthase 1, muscle [Source:MGI Symbol;Acc:MGI:101805]	protein_coding	6.24268	4.77165	4.5767	6.57194	5.22593	9.06886	7.01823	7.91753	6.16319	3.69193	4.05352	3.3927
ENSMUSG00000003868	Ruvbl2	7	-	45421760	45438096	RuvB-like protein 2 [Source:MGI Symbol;Acc:MGI:1342299]	protein_coding	24.3359	24.5768	23.3703	60.6944	36.3035	47.8535	21.373	20.8166	20.6347	13.5684	15.1679	7.58641
ENSMUSG00000003872	Lin7b	7	-	45367891	45370583	lin-7 homolog B (C. elegans) [Source:MGI Symbol;Acc:MGI:1330858]	protein_coding	0.127229	0	0	0	0.35872	0	0	0.385026	0	0	0	0
ENSMUSG00000003873	Bax	7	-	45461697	45466898	BCL2-associated X protein [Source:MGI Symbol;Acc:MGI:99702]	protein_coding	189.078	162.822	176.849	265.581	194.465	192.213	69.6586	90.9696	76.1669	93.0068	53.7582	40.7705
ENSMUSG00000003882	Il7r	15	-	9505788	9530176	interleukin 7 receptor [Source:MGI Symbol;Acc:MGI:96562]	protein_coding	0.312362	0.182871	0.070791	0	0	0	0.208261	1.14649	0.539593	0.797384	0.290088	0
ENSMUSG00000003923	Tfam	10	-	71225464	71238280	transcription factor A, mitochondrial [Source:MGI Symbol;Acc:MGI:107810]	protein_coding	4.09288	3.97776	4.44116	3.82497	6.68115	6.66242	2.71637	2.59508	3.21514	1.46169	4.03135	2.15607
ENSMUSG00000003929	Zfp81	17	-	33329342	33358878	zinc finger protein 81 [Source:MGI Symbol;Acc:MGI:1890752]	protein_coding	0.264062	0.66919	0.481733	0.132531	0	1.68162	0.468945	0.639825	0.898381	2.64485	4.27385	0.898117
ENSMUSG00000003934	Efnb3	11	-	69554092	69560205	ephrin B3 [Source:MGI Symbol;Acc:MGI:109196]	protein_coding	0	0	0.041197	0	0.14562	0	0	0.088228	0.405412	0	0	0
ENSMUSG00000003948	Mmd	11	+	90249456	90278589	monocyte to macrophage differentiation-associated [Source:MGI Symbol;Acc:MGI:1914718]	protein_coding	7.64973	9.42319	6.83579	6.29817	3.61713	9.00614	1.97187	0.807373	2.21737	1.42058	1.18502	2.78322
ENSMUSG00000003949	Hlf	11	-	90336536	90390895	hepatic leukemia factor [Source:MGI Symbol;Acc:MGI:96108]	protein_coding	0	0	0	0	0.037798	0	0	0.106715	0.226137	0.310493	0.206444	0.491228
ENSMUSG00000003955	Fam162a	16	-	36043761	36071594	family with sequence similarity 162, member A [Source:MGI Symbol;Acc:MGI:1917436]	protein_coding	191.112	249.663	234.644	255.949	245.9	245.301	123.149	139.234	144.257	90.2631	61.4704	55.7334
ENSMUSG00000003970	Rpl8	15	+	76904078	76906314	ribosomal protein L8 [Source:MGI Symbol;Acc:MGI:1350927]	protein_coding	743.81	1038.81	1170.62	1533.4	1477.31	1626.16	1568.94	1872.86	1632.56	1794.08	1749.28	1494.1
ENSMUSG00000003974	Grm3	5	-	9485541	9725170	glutamate receptor, metabotropic 3 [Source:MGI Symbol;Acc:MGI:1351340]	protein_coding	0	0	0	0	0	0	0	0	0	0	0.280292	0
ENSMUSG00000003992	Ssbp2	13	+	91460283	91703429	single-stranded DNA binding protein 2 [Source:MGI Symbol;Acc:MGI:1914220]	protein_coding	20.0822	13.404	16.5816	10.8846	13.106	17.2926	24.8769	19.7724	19.515	8.20105	13.2671	18.0765
ENSMUSG00000004018	Fancl	11	+	26386135	26471876	Fanconi anemia, complementation group L [Source:MGI Symbol;Acc:MGI:1914280]	protein_coding	7.24024	10.3902	7.46545	11.9615	12.2722	10.6226	7.21298	10.3333	6.01757	9.43829	8.68055	13.5077
ENSMUSG00000004031	Brinp2	1	-	158245269	158356326	bone morphogenic protein/retinoic acid inducible neural-specific 2 [Source:MGI Symbol;Acc:MGI:2443333]	protein_coding	0	0	0	0	0.312306	0	0	0.112363	0.028509	0.099102	0.202888	0.604881
ENSMUSG00000004032	Gstm5	3	+	107895821	107898686	glutathione S-transferase, mu 5 [Source:MGI Symbol;Acc:MGI:1309466]	protein_coding	1.67572	1.30667	1.9571	0.529288	1.88358	5.05622	0	0.886234	1.07958	0	0	0
ENSMUSG00000004035	Gstm7	3	-	107926334	107931817	glutathione S-transferase, mu 7 [Source:MGI Symbol;Acc:MGI:1915562]	protein_coding	1.12233	1.30688	0.712728	1.0581	0.909811	0.019125	0	0	0	0	0	0
ENSMUSG00000004038	Gstm3	3	-	107963696	107969283	glutathione S-transferase, mu 3 [Source:MGI Symbol;Acc:MGI:106026]	protein_coding	0.438301	0.656374	0.303622	0.441169	0.553461	0.379701	0	0.143173	0.170067	0	0	0
ENSMUSG00000004040	Stat3	11	-	100885098	100939540	signal transducer and activator of transcription 3 [Source:MGI Symbol;Acc:MGI:103038]	protein_coding	32.16	24.8493	24.861	22.6413	25.2883	22.0821	14.6722	24.7965	25.8382	9.83812	10.9879	6.50476
ENSMUSG00000004043	Stat5a	11	+	100859351	100885169	signal transducer and activator of transcription 5A [Source:MGI Symbol;Acc:MGI:103036]	protein_coding	5.07606	4.1839	4.32057	4.38689	3.53585	4.77658	5.67767	7.02294	6.20807	8.16284	4.08733	3.34782
ENSMUSG00000004044	Cavin1	11	-	100956733	100970887	caveolae associated 1 [Source:MGI Symbol;Acc:MGI:1277968]	protein_coding	0	0	0.08464	0.028952	0.166201	0.246072	0	0	0	0	0	0
ENSMUSG00000004054	Map3k11	19	+	5688742	5702865	mitogen-activated protein kinase kinase kinase 11 [Source:MGI Symbol;Acc:MGI:1346880]	protein_coding	6.46559	7.69531	7.85287	5.35302	8.17083	6.23266	11.2141	12.2436	12.3557	14.785	9.68598	6.67468
ENSMUSG00000004056	Akt2	7	+	27591552	27640826	thymoma viral proto-oncogene 2 [Source:MGI Symbol;Acc:MGI:104874]	protein_coding	12.2262	8.94577	8.24794	17.3784	10.959	13.6424	7.31575	7.27985	4.64166	2.58126	1.86042	2.34116
ENSMUSG00000004069	Dnaja3	16	+	4639989	4707695	DnaJ heat shock protein family (Hsp40) member A3 [Source:MGI Symbol;Acc:MGI:1933786]	protein_coding	6.63083	7.07321	7.2008	12.031	8.715	5.91316	3.34837	6.40817	5.04401	4.6098	2.56681	2.06983
ENSMUSG00000004070	Hmox2	16	+	4726361	4766742	heme oxygenase 2 [Source:MGI Symbol;Acc:MGI:109373]	protein_coding	42.6495	39.8247	36.488	35.6041	35.9416	38.8518	11.7574	12.3895	13.5359	14.7074	8.12515	11.4438
ENSMUSG00000004071	Cdip1	16	-	4750348	4790292	cell death inducing Trp53 target 1 [Source:MGI Symbol;Acc:MGI:1913876]	protein_coding	3.60881	3.19909	3.16961	6.20774	3.98472	4.45653	4.78566	5.64919	4.90597	6.15508	3.31902	3.58679
ENSMUSG00000004085	Map3k20	2	+	72285637	72442610	mitogen-activated protein kinase kinase kinase 20 [Source:MGI Symbol;Acc:MGI:2443258]	protein_coding	0.046354	0.055979	0.123154	0.233249	0.015367	0.009444	0.274399	0.322432	0.2701	0.121104	0.21303	1.45983
ENSMUSG00000004096	Cwc15	9	+	14500617	14510577	CWC15 spliceosome-associated protein [Source:MGI Symbol;Acc:MGI:1913320]	protein_coding	132.482	152.224	133.749	137.361	136.962	143.103	100.083	104.377	121.294	101.647	109.004	78.2652
ENSMUSG00000004098	Col5a3	9	-	20770050	20815067	collagen, type V, alpha 3 [Source:MGI Symbol;Acc:MGI:1858212]	protein_coding	0	0	0.013953	0	0	0.005052	0	0	0	0	0	0
ENSMUSG00000004099	Dnmt1	9	-	20907209	20959888	DNA methyltransferase (cytosine-5) 1 [Source:MGI Symbol;Acc:MGI:94912]	protein_coding	11.9321	10.2547	11.056	12.1085	13.4231	11.5074	17.8747	16.3172	20.1184	14.7291	19.1689	16.027
ENSMUSG00000004100	Ppan	9	+	20888175	20892178	peter pan homolog [Source:MGI Symbol;Acc:MGI:2178445]	protein_coding	8.49919	6.72455	9.12008	18.0386	24.7692	10.6402	29.1558	29.3815	28.6843	10.3469	23.2355	12.8085
ENSMUSG00000004105	Angptl2	2	+	33216069	33247717	angiopoietin-like 2 [Source:MGI Symbol;Acc:MGI:1347002]	protein_coding	0.671878	0.301854	0.6712	0.160183	1.74718	0.128765	1.03803	1.11651	0.374478	1.93768	0	0
ENSMUSG00000004110	Cacna1e	1	-	154390731	154884501	calcium channel, voltage-dependent, R type, alpha 1E subunit [Source:MGI Symbol;Acc:MGI:106217]	protein_coding	0.559533	0.184096	0.217321	0	0	0.428399	0.459725	0.336692	1.10159	2.07169	1.80907	4.10728
ENSMUSG00000004113	Cacna1b	2	-	24603887	24763152	calcium channel, voltage-dependent, N type, alpha 1B subunit [Source:MGI Symbol;Acc:MGI:88296]	protein_coding	0.019592	0	0.017599	0.065552	0	0	0.123265	0.191752	0.254614	0	0.063994	0.4986
ENSMUSG00000004127	Trmt10a	3	+	138143448	138159821	tRNA methyltransferase 10A [Source:MGI Symbol;Acc:MGI:1920421]	protein_coding	2.0221	1.85908	4.76325	2.7813	0.546553	3.51949	2.52663	4.70401	4.29678	0.950145	3.32121	3.99661
ENSMUSG00000004151	Etv1	12	+	38779380	38870484	ets variant 1 [Source:MGI Symbol;Acc:MGI:99254]	protein_coding	0	0.046187	0.103779	0	0	0.163018	0.358594	0.713039	0.294207	0.653315	0.081959	1.20844
ENSMUSG00000004187	Kifc2	15	+	76659858	76668196	kinesin family member C2 [Source:MGI Symbol;Acc:MGI:109187]	protein_coding	0.536459	0.247446	0.413734	0.237328	0	0.130818	0.122242	0.45496	1.37789	0.093447	0	0.380635
ENSMUSG00000004207	Psap	10	+	60277627	60302597	prosaposin [Source:MGI Symbol;Acc:MGI:97783]	protein_coding	35.3294	28.1395	34.4687	21.259	30.01	22.2303	36.6803	42.9846	34.2052	24.4566	24.9758	19.1185
ENSMUSG00000004221	Ikbkg	X	+	74393290	74453854	inhibitor of kappaB kinase gamma [Source:MGI Symbol;Acc:MGI:1338074]	protein_coding	11.9313	7.76149	9.95469	9.4605	4.85295	2.44342	1.88356	2.69137	2.85826	1.43631	1.49804	0.702954
ENSMUSG00000004231	Pax2	19	+	44756045	44837871	paired box 2 [Source:MGI Symbol;Acc:MGI:97486]	protein_coding	0	0	0	0	0	0	0.011698	0	0	0	0	0
ENSMUSG00000004233	Wars2	3	+	99141068	99239186	tryptophanyl tRNA synthetase 2 (mitochondrial) [Source:MGI Symbol;Acc:MGI:1917810]	protein_coding	2.04344	0.884288	1.84525	2.06542	1.38224	1.83489	2.25797	2.34609	2.35467	2.54406	0.893668	1.08839
ENSMUSG00000004263	Atn1	6	-	124742544	124756524	atrophin 1 [Source:MGI Symbol;Acc:MGI:104725]	protein_coding	2.22155	1.8302	1.33553	1.98172	3.31403	1.40236	2.96287	2.50027	3.45496	1.73812	1.13061	1.16508
ENSMUSG00000004264	Phb2	6	+	124712336	124716950	prohibitin 2 [Source:MGI Symbol;Acc:MGI:102520]	protein_coding	50.6628	59.8304	64.1967	123.328	110.881	109.553	71.0654	69.1246	55.8624	35.7763	59.2078	26.5928
ENSMUSG00000004266	Ptpn6	6	-	124720707	124738714	protein tyrosine phosphatase, non-receptor type 6 [Source:MGI Symbol;Acc:MGI:96055]	protein_coding	153.635	130.832	156.921	119.65	103.424	108.268	204.705	221.608	195.242	135.781	152.494	109.757
ENSMUSG00000004267	Eno2	6	-	124760053	124769673	enolase 2, gamma neuronal [Source:MGI Symbol;Acc:MGI:95394]	protein_coding	0.227071	0.107924	0.284069	0	0	0	0.120285	2.01461	2.17934	0.141086	0	0.299565
ENSMUSG00000004268	Emg1	6	-	124704085	124712178	EMG1 N1-specific pseudouridine methyltransferase [Source:MGI Symbol;Acc:MGI:1315195]	protein_coding	99.408	100.473	90.7141	183.295	174.465	137.438	56.4835	61.716	43.3065	55.6122	31.7879	51.4579
ENSMUSG00000004270	Lpcat3	6	+	124663027	124704418	lysophosphatidylcholine acyltransferase 3 [Source:MGI Symbol;Acc:MGI:1315211]	protein_coding	33.7108	25.2557	23.5672	25.2152	31.1887	30.6579	20.1084	25.9587	20.9287	3.42744	14.411	11.5012
ENSMUSG00000004285	Atp6v1f	6	+	29467718	29470512	ATPase, H+ transporting, lysosomal V1 subunit F [Source:MGI Symbol;Acc:MGI:1913394]	protein_coding	158.956	200.207	183.876	178.48	156.211	191.829	111.546	122.349	95.1171	73.9053	83.073	133.528
ENSMUSG00000004296	Il12b	11	+	44400063	44414033	interleukin 12b [Source:MGI Symbol;Acc:MGI:96540]	protein_coding	0	0	0	0	0	0	0	0	0	0	0	1.89218
ENSMUSG00000004317	Clcn5	X	-	7153810	7319358	chloride channel, voltage-sensitive 5 [Source:MGI Symbol;Acc:MGI:99486]	protein_coding	1.40095	1.08177	1.81506	0.378363	0.913525	1.17171	4.08186	2.10001	2.41443	1.62178	1.36871	2.76744
ENSMUSG00000004319	Clcn3	8	-	60910389	60983300	chloride channel, voltage-sensitive 3 [Source:MGI Symbol;Acc:MGI:103555]	protein_coding	14.6582	12.0004	11.6356	12.8934	11.259	10.6081	11.8007	15.0007	14.0838	10.2791	14.8061	12.1572
ENSMUSG00000004328	Hif3a	7	-	17031507	17062427	hypoxia inducible factor 3, alpha subunit [Source:MGI Symbol;Acc:MGI:1859778]	protein_coding	0	0.109672	0.011971	0	0	0	0	0.030446	0	0.072452	0	0.276264
ENSMUSG00000004341	Gpx6	13	+	21312125	21319624	glutathione peroxidase 6 [Source:MGI Symbol;Acc:MGI:1922762]	protein_coding	0	0	0	0	0	0	0	0	0	0	0	0
ENSMUSG00000004344	Gpx5	13	-	21286429	21292731	glutathione peroxidase 5 [Source:MGI Symbol;Acc:MGI:104886]	protein_coding	0	0	0	0	0	0	0	0	0.185377	1.27018	0.342544	0.552997
ENSMUSG00000004347	Pde1c	6	-	56069804	56652487	phosphodiesterase 1C [Source:MGI Symbol;Acc:MGI:108413]	protein_coding	0.017496	0.032513	0.020211	0.009015	0	0.009796	0.666142	1.76447	4.10476	0.810241	2.40203	4.899
ENSMUSG00000004356	Utp20	10	-	88746607	88826804	UTP20 small subunit processome component [Source:MGI Symbol;Acc:MGI:1917933]	protein_coding	1.15731	1.06762	1.1075	1.62469	1.96041	5.96163	4.5249	3.90515	4.13064	6.84782	4.42804	2.49235
ENSMUSG00000004359	Spic	10	-	88674772	88685015	Spi-C transcription factor (Spi-1/PU.1 related) [Source:MGI Symbol;Acc:MGI:1341168]	protein_coding	0	0	0	0.142237	0	0	0	0	0	0	0	0
ENSMUSG00000004360	9330159F19Rik	10	+	29211606	29230779	RIKEN cDNA 9330159F19 gene [Source:MGI Symbol;Acc:MGI:3036239]	protein_coding	0	0	0	0	0	0	0.028134	0.088192	0.183096	0.058926	1.09635	0.739236
ENSMUSG00000004364	Cul3	1	-	80264923	80340480	cullin 3 [Source:MGI Symbol;Acc:MGI:1347360]	protein_coding	36.387	24.6676	27.218	28.2606	19.1411	15.3002	20.7879	21.392	19.0238	12.1321	19.735	9.31739
ENSMUSG00000004366	Sst	16	-	23889573	23890958	somatostatin [Source:MGI Symbol;Acc:MGI:98326]	protein_coding	0	0	0	0	0	0	0	0.95322	0.620993	0	0	0
ENSMUSG00000004371	Il11	7	-	4772373	4782859	interleukin 11 [Source:MGI Symbol;Acc:MGI:107613]	protein_coding	0	0.034265	0	0	0	0	0.211026	0.423376	0.127937	0.502903	0	0
ENSMUSG00000004383	Large1	8	-	72814599	73353540	LARGE xylosyl- and glucuronyltransferase 1 [Source:MGI Symbol;Acc:MGI:1342270]	protein_coding	0.07864	0.014718	0.067661	0.105605	0	0.037395	0.001742	0.08427	0.411522	0.711618	3.26381	1.74219
ENSMUSG00000004393	Ddx56	11	-	6258919	6267772	DEAD (Asp-Glu-Ala-Asp) box polypeptide 56 [Source:MGI Symbol;Acc:MGI:1277172]	protein_coding	13.5993	12.7853	11.8646	15.7295	20.7631	20.449	11.5647	10.0845	6.10653	10.1475	7.78208	8.77763
ENSMUSG00000004394	Tmed4	11	-	6270369	6274870	transmembrane p24 trafficking protein 4 [Source:MGI Symbol;Acc:MGI:1915070]	protein_coding	28.1648	20.1456	16.1215	24.4641	35.3823	20.1553	4.80976	4.85199	5.5297	2.5402	7.23337	1.16105
ENSMUSG00000004415	Col26a1	5	-	136741759	136883209	collagen, type XXVI, alpha 1 [Source:MGI Symbol;Acc:MGI:2155345]	protein_coding	0	0.018586	0	0.136513	0	1.06774	0.008811	0.049629	0.234778	0.717169	0.14324	0.190259
ENSMUSG00000004446	Bid	6	-	120891930	120916853	BH3 interacting domain death agonist [Source:MGI Symbol;Acc:MGI:108093]	protein_coding	30.5671	25.8356	25.1411	36.3728	35.5064	42.4983	8.24005	12.2608	8.2726	5.17813	9.67004	8.18456
ENSMUSG00000004451	Ralb	1	-	119470305	119504794	v-ral simian leukemia viral oncogene B [Source:MGI Symbol;Acc:MGI:1927244]	protein_coding	54.4104	40.8319	32.4012	44.9698	38.3059	40.9916	23.5514	30.4	28.3069	23.2733	15.9917	19.1781
ENSMUSG00000004455	Ppp1cc	5	+	122158278	122175273	protein phosphatase 1 catalytic subunit gamma [Source:MGI Symbol;Acc:MGI:104872]	protein_coding	51.267	38.0338	32.3051	64.0546	59.1409	46.1901	9.6382	10.5236	6.74934	2.66017	8.93114	3.29685
ENSMUSG00000004460	Dnajb11	16	+	22857845	22879634	DnaJ heat shock protein family (Hsp40) member B11 [Source:MGI Symbol;Acc:MGI:1915088]	protein_coding	62.1397	42.2622	48.2216	85.198	75.7366	60.4644	46.1426	52.7619	47.6041	36.4127	9.02025	33.2613
ENSMUSG00000004462	Tbccd1	16	-	22813214	22857669	TBCC domain containing 1 [Source:MGI Symbol;Acc:MGI:1917823]	protein_coding	7.61862	5.87696	5.58105	7.94513	5.2004	10.7893	5.12988	4.67971	4.25333	2.72506	1.09377	3.54642
ENSMUSG00000004473	Clec11a	7	-	44302687	44306902	C-type lectin domain family 11, member a [Source:MGI Symbol;Acc:MGI:1298219]	protein_coding	12.0239	14.0245	10.1901	35.3462	24.6356	28.676	23.8728	22.5428	22.5739	14.7595	17.9253	18.0446
ENSMUSG00000004500	Zfp324	7	+	12965838	12974236	zinc finger protein 324 [Source:MGI Symbol;Acc:MGI:2444641]	protein_coding	0.538516	0.689274	0.533267	0.550525	0.56197	2.60605	0.999281	0.363711	0.283209	1.1712	0.421471	0.331266
ENSMUSG00000004508	Gab2	7	+	97081586	97308946	growth factor receptor bound protein 2-associated protein 2 [Source:MGI Symbol;Acc:MGI:1333854]	protein_coding	5.47402	4.50278	5.01881	3.37878	1.84748	3.81569	5.23475	5.737	7.07621	5.22149	4.46641	6.02501
ENSMUSG00000004530	Coro1c	5	-	113842436	113908758	coronin, actin binding protein 1C [Source:MGI Symbol;Acc:MGI:1345964]	protein_coding	36.2366	23.4558	25.9639	17.8363	15.2001	22.0095	27.4275	27.4616	26.1373	7.7592	14.2171	10.8202
ENSMUSG00000004535	Tax1bp1	6	+	52713729	52766780	Tax1 (human T cell leukemia virus type I) binding protein 1 [Source:MGI Symbol;Acc:MGI:1289308]	protein_coding	126.018	98.4459	101.52	94.8455	76.8658	103.188	81.1138	75.569	77.8903	55.6924	72.6142	58.8918
ENSMUSG00000004540	Psg17	7	-	18813937	18821607	pregnancy specific glycoprotein 17 [Source:MGI Symbol;Acc:MGI:1347250]	protein_coding	0	0	0	0	0	0	0	0.113789	0	0	0.259928	0
ENSMUSG00000004542	Psg19	7	-	18789567	18798520	pregnancy specific glycoprotein 19 [Source:MGI Symbol;Acc:MGI:1347252]	protein_coding	0	0	0	0	0	0	0.049499	0	0	0	0	0
ENSMUSG00000004552	Ctse	1	+	131638306	131675505	cathepsin E [Source:MGI Symbol;Acc:MGI:107361]	protein_coding	15.5418	13.2294	13.7428	12.1809	22.4548	13.4462	2.83413	4.83818	3.01866	0.924817	0.684664	0
ENSMUSG00000004558	Ndrg2	14	-	51905271	51914158	N-myc downstream regulated gene 2 [Source:MGI Symbol;Acc:MGI:1352498]	protein_coding	9.51767	7.91475	7.95058	19.2744	16.3906	7.00591	1.93017	3.26784	4.48666	0.5636	0.582692	1.53822
ENSMUSG00000004561	Mettl17	14	+	51884842	51893039	methyltransferase like 17 [Source:MGI Symbol;Acc:MGI:1098577]	protein_coding	9.95335	10.1713	10.9846	14.969	10.7622	12.3141	11.6613	6.05423	4.69362	2.99953	8.75694	2.53488
ENSMUSG00000004562	Arhgef40	14	+	51984719	52006251	Rho guanine nucleotide exchange factor (GEF) 40 [Source:MGI Symbol;Acc:MGI:2685515]	protein_coding	0.151467	0.084074	0.348688	0	0.249379	0	0.105411	1.96667	0.357608	0	0.324391	0
ENSMUSG00000004565	Pnpla6	8	+	3515384	3544267	patatin-like phospholipase domain containing 6 [Source:MGI Symbol;Acc:MGI:1354723]	protein_coding	10.9557	8.57407	9.79735	9.62233	8.48614	13.0852	5.95618	7.36812	7.1078	1.16895	2.48622	3.26906
ENSMUSG00000004567	Mcoln1	8	+	3500457	3515232	mucolipin 1 [Source:MGI Symbol;Acc:MGI:1890498]	protein_coding	31.0934	21.8674	22.694	19.7554	21.4039	20.5259	29.4499	32.0935	23.0155	13.3268	29.9551	22.0061
ENSMUSG00000004568	Arhgef18	8	+	3353415	3456601	rho/rac guanine nucleotide exchange factor (GEF) 18 [Source:MGI Symbol;Acc:MGI:2142567]	protein_coding	13.9881	8.7061	10.6159	7.51773	8.22457	8.49639	11.3966	12.9627	9.59058	6.1975	8.91918	4.72195
ENSMUSG00000004591	Pkn2	3	-	142790902	142882004	protein kinase N2 [Source:MGI Symbol;Acc:MGI:109211]	protein_coding	13.8781	14.2795	11.3169	17.0617	13.9076	22.1797	22.4074	26.7685	23.2594	11.0646	18.0405	16.8275
ENSMUSG00000004609	Cd33	7	-	43524216	43544428	CD33 antigen [Source:MGI Symbol;Acc:MGI:99440]	protein_coding	111.334	97.9714	91.2905	43.8744	51.3538	39.8445	18.8695	15.1873	13.5056	5.58965	8.46006	3.19218
ENSMUSG00000004610	Etfb	7	+	43444083	43457800	electron transferring flavoprotein, beta polypeptide [Source:MGI Symbol;Acc:MGI:106098]	protein_coding	198.463	219.527	214.636	346.247	239.046	303.492	166.121	204.354	180.034	199.931	216.102	193.369
ENSMUSG00000004612	Nkg7	7	+	43437073	43438249	natural killer cell group 7 sequence [Source:MGI Symbol;Acc:MGI:1931250]	protein_coding	44.9995	51.8146	50.8631	189.376	237.065	185.619	17.146	17.2706	16.5765	29.9356	25.3593	8.61446
ENSMUSG00000004626	Stxbp2	8	+	3630955	3643644	syntaxin binding protein 2 [Source:MGI Symbol;Acc:MGI:107370]	protein_coding	97.9847	93.5323	90.7222	90.6569	89.5862	79.0847	62.4089	65.9862	66.175	51.6982	51.5653	74.0185
ENSMUSG00000004630	Pcp2	8	-	3623371	3625545	Purkinje cell protein 2 (L7) [Source:MGI Symbol;Acc:MGI:97508]	protein_coding	0	0	0	0	0	0	0	0	0	0.258666	0	0
ENSMUSG00000004631	Sgce	6	-	4674350	4747207	sarcoglycan, epsilon [Source:MGI Symbol;Acc:MGI:1329042]	protein_coding	0	0	0.06902	0.113528	0	0.307537	0.642478	0.708596	1.91456	3.30627	6.12512	3.73782
ENSMUSG00000004633	Chn2	6	+	54039554	54301810	chimerin 2 [Source:MGI Symbol;Acc:MGI:1917243]	protein_coding	1.02444	0.426564	0.279467	2.33815	0.80733	2.36589	0	0.27541	0.527696	0	0	0.451263
ENSMUSG00000004637	Wwox	8	+	114439655	115352708	WW domain-containing oxidoreductase [Source:MGI Symbol;Acc:MGI:1931237]	protein_coding	11.8696	12.0096	12.7241	12.072	10.0998	9.69508	13.117	13.7009	10.7204	9.85464	4.40473	4.62246
ENSMUSG00000004642	Slbp	5	-	33634952	33652574	stem-loop binding protein [Source:MGI Symbol;Acc:MGI:108402]	protein_coding	53.2616	54.727	38.7149	76.9209	71.4865	79.8728	19.7247	16.7931	18.2049	10.7625	9.51301	13.5585
ENSMUSG00000004651	Tyr	7	-	87424771	87493512	tyrosinase [Source:MGI Symbol;Acc:MGI:98880]	protein_coding	0	0	0.031831	0.027154	0	0	0.130442	0.37064	0.366001	2.26456	0.367301	5.52939
ENSMUSG00000004654	Ghrhr	6	+	55376295	55388530	growth hormone releasing hormone receptor [Source:MGI Symbol;Acc:MGI:95710]	protein_coding	0	0	0	0	0	0	0	0	0	0	0	0
ENSMUSG00000004655	Aqp1	6	+	55336432	55348555	aquaporin 1 [Source:MGI Symbol;Acc:MGI:103201]	protein_coding	0	0.02776	0.401656	0	0	0	0	0	0.070669	0	0	0
ENSMUSG00000004661	Arid3b	9	-	57790353	57836793	AT rich interactive domain 3B (BRIGHT-like) [Source:MGI Symbol;Acc:MGI:1930768]	protein_coding	1.40289	1.39324	1.8967	0.801643	1.81065	1.17039	0.888783	1.57954	1.36997	1.22802	0	0.635149
ENSMUSG00000004665	Cnn2	10	+	79988584	79996062	calponin 2 [Source:MGI Symbol;Acc:MGI:105093]	protein_coding	171.439	176.323	168.133	156.659	119.756	114.001	85.4935	97.8477	82.8754	38.0563	51.892	47.2771
ENSMUSG00000004667	Polr2e	10	-	80035949	80039795	polymerase (RNA) II (DNA directed) polypeptide E [Source:MGI Symbol;Acc:MGI:1913670]	protein_coding	48.641	57.6071	46.7379	56.1042	48.5887	52.2699	33.8418	40.1269	22.911	12.0968	32.802	21.323
ENSMUSG00000004668	Abca13	11	+	9191942	9684259	ATP-binding cassette, sub-family A (ABC1), member 13 [Source:MGI Symbol;Acc:MGI:2388707]	protein_coding	7.07367	5.30581	4.18368	3.82273	2.78488	4.70187	2.68212	3.45468	3.46663	2.56128	1.97243	2.7593
ENSMUSG00000004677	Myo9b	8	+	71272714	71360713	myosin IXb [Source:MGI Symbol;Acc:MGI:106624]	protein_coding	18.5877	12.5199	19.0638	11.1653	12.3194	15.0591	17.4413	15.4459	13.0284	11.8661	15.2619	11.174
ENSMUSG00000004698	Hdac9	12	-	34047580	34917095	histone deacetylase 9 [Source:MGI Symbol;Acc:MGI:1931221]	protein_coding	1.21186	1.35051	0.904852	0.460889	1.10737	0.055772	1.65337	1.96826	1.56211	2.69638	3.27159	8.21699
ENSMUSG00000004707	Ly9	1	-	171588624	171607410	lymphocyte antigen 9 [Source:MGI Symbol;Acc:MGI:96885]	protein_coding	0	0	0.088433	0.187123	0.02596	0	0	0.128542	0.077909	0	0	0
ENSMUSG00000004709	Cd244a	1	+	171559193	171609746	CD244 molecule A [Source:MGI Symbol;Acc:MGI:109294]	protein_coding	0.704682	0.139166	1.01143	0.620848	2.75705	0.790273	0.227932	0.80602	0.603872	2.90378	1.92662	0.198662
ENSMUSG00000004730	Adgre1	17	+	57358691	57483527	adhesion G protein-coupled receptor E1 [Source:MGI Symbol;Acc:MGI:106912]	protein_coding	10.0705	5.79427	5.23335	1.6961	3.37608	2.64149	2.76677	2.64936	3.60191	1.54813	4.10116	1.99427
ENSMUSG00000004748	Mtfp1	11	-	4091480	4095445	mitochondrial fission process 1 [Source:MGI Symbol;Acc:MGI:1916686]	protein_coding	0.658214	1.1586	0.656315	0	7.33074	4.78185	0.352031	0.383218	0.683653	0	0.95834	0
ENSMUSG00000004768	Rab23	1	+	33719887	33742564	RAB23, member RAS oncogene family [Source:MGI Symbol;Acc:MGI:99833]	protein_coding	0.058366	0	0.236807	0	0.112577	2.55621	0.444597	0.738803	1.10833	0.565816	1.89325	0.658838
ENSMUSG00000004771	Rab11a	9	-	64715299	64737758	RAB11A, member RAS oncogene family [Source:MGI Symbol;Acc:MGI:1858202]	protein_coding	97.0701	91.9654	92.1214	94.4008	83.1713	90.1746	27.2039	28.4844	28.4927	29.2828	18.187	20.2448
ENSMUSG00000004788	Eif2b2	12	+	85219481	85226628	eukaryotic translation initiation factor 2B, subunit 2 beta [Source:MGI Symbol;Acc:MGI:2145118]	protein_coding	29.5469	21.9664	18.6657	34.3158	36.0322	29.0334	16.6629	16.1491	12.2885	31.3726	24.1338	18.4916
ENSMUSG00000004789	Dlst	12	+	85110833	85134845	dihydrolipoamide S-succinyltransferase (E2 component of 2-oxo-glutarate complex) [Source:MGI Symbol;Acc:MGI:1926170]	protein_coding	26.2546	24.5292	24.6289	28.044	28.4707	28.2918	44.4968	34.6223	41.9359	11.1399	21.5666	23.3463
ENSMUSG00000004791	Pgf	12	-	85166635	85177790	placental growth factor [Source:MGI Symbol;Acc:MGI:105095]	protein_coding	0.060572	0	0.370368	0	1.03123	0	0.144409	0.656673	0.172381	1.09249	0.393641	0.675762
ENSMUSG00000004798	Ulk2	11	-	61775649	61855073	unc-51 like kinase 2 [Source:MGI Symbol;Acc:MGI:1352758]	protein_coding	4.53064	3.98231	4.40587	3.3235	1.55931	3.06392	2.87198	4.05487	2.54803	2.90806	6.09642	8.70942
ENSMUSG00000004814	Ccl24	5	-	135569937	135573049	chemokine (C-C motif) ligand 24 [Source:MGI Symbol;Acc:MGI:1928953]	protein_coding	22.5485	25.8698	27.3955	16.4985	15.0465	21.763	0.983117	1.5297	1.37664	0.492901	0.774888	0.826061
ENSMUSG00000004815	Dgkq	5	-	108646693	108669672	diacylglycerol kinase, theta [Source:MGI Symbol;Acc:MGI:102918]	protein_coding	0.321456	0.270686	0.106892	0.057663	0.042779	0.490139	0	0	0.176061	0	0	0
ENSMUSG00000004821	Tmed11	5	-	108777235	108795363	transmembrane p24 trafficking protein 11 [Source:MGI Symbol;Acc:MGI:1914616]	protein_coding	0	0	0	0	0	0	0	0	0	0	0.832825	0
ENSMUSG00000004837	Grap	11	+	61653265	61672784	GRB2-related adaptor protein [Source:MGI Symbol;Acc:MGI:1918770]	protein_coding	0.36699	0.06928	0.282456	0.129207	0.228431	0	0.082075	0	0	0	0	0
ENSMUSG00000004842	Pou1f1	16	+	65520511	65535005	POU domain, class 1, transcription factor 1 [Source:MGI Symbol;Acc:MGI:97588]	protein_coding	0.042973	0.125644	0.050128	0	0.345275	0.026316	0.736476	0.951336	1.76916	1.74669	2.67159	4.14585
ENSMUSG00000004843	Chmp2b	16	-	65539128	65562726	charged multivesicular body protein 2B [Source:MGI Symbol;Acc:MGI:1916192]	protein_coding	35.8687	34.9632	32.9448	50.4953	35.0842	26.4396	18.3901	12.6877	16.2479	8.79947	10.6709	7.75934
ENSMUSG00000004846	Plod3	5	+	136987019	136996648	procollagen-lysine, 2-oxoglutarate 5-dioxygenase 3 [Source:MGI Symbol;Acc:MGI:1347008]	protein_coding	18.2274	13.2239	19.7782	26.9406	23.5083	17.3896	21.1252	21.5388	20.7049	14.1698	17.9585	15.2206
ENSMUSG00000004849	Ap1s1	5	-	137034993	137046135	adaptor protein complex AP-1, sigma 1 [Source:MGI Symbol;Acc:MGI:1098244]	protein_coding	87.5077	74.0848	71.8206	111.954	110.431	77.9898	36.3648	40.8908	38.6254	52.7312	43.8762	50.1445
ENSMUSG00000004864	Mapk13	17	+	28769297	28780233	mitogen-activated protein kinase 13 [Source:MGI Symbol;Acc:MGI:1346864]	protein_coding	95.4044	79.0683	70.9994	46.9797	44.0715	43.8131	31.0058	27.2991	21.9496	7.31592	10.2538	12.5128
ENSMUSG00000004865	Srpk1	17	-	28587648	28622709	serine/arginine-rich protein specific kinase 1 [Source:MGI Symbol;Acc:MGI:106908]	protein_coding	15.5852	13.5821	13.1624	17.1	14.9254	20.8008	18.0293	17.0796	25.9823	12.1193	19.1198	15.4542
ENSMUSG00000004872	Pax3	1	-	78101267	78197134	paired box 3 [Source:MGI Symbol;Acc:MGI:97487]	protein_coding	0.041307	0	0.021649	0	0	0.066987	0.217777	0.439643	0.918378	0	2.63607	0.489606
ENSMUSG00000004880	Lbr	1	-	181815335	181843046	lamin B receptor [Source:MGI Symbol;Acc:MGI:2138281]	protein_coding	99.3504	70.1642	74.709	111.638	103.177	111.732	71.6085	66.4383	66.18	62.3882	66.2556	60.0987
ENSMUSG00000004885	Crabp2	3	+	87948666	87953376	cellular retinoic acid binding protein II [Source:MGI Symbol;Acc:MGI:88491]	protein_coding	0.109946	0	0.274213	0	0.25093	0	0	0.126395	0	0	0	1.35002
ENSMUSG00000004891	Nes	3	+	87971078	87980451	nestin [Source:MGI Symbol;Acc:MGI:101784]	protein_coding	0	0	0	0	0	0.041727	0	0	0	0.101419	0	0
ENSMUSG00000004892	Bcan	3	-	87987531	88000230	brevican [Source:MGI Symbol;Acc:MGI:1096385]	protein_coding	0	0	0	0	0	0	0	0.324425	0.506949	0.174316	0	0
ENSMUSG00000004894	Hapln2	3	-	88021750	88027583	hyaluronan and proteoglycan link protein 2 [Source:MGI Symbol;Acc:MGI:2137300]	protein_coding	0	0	0	0	0	0	0	0	0.193061	0	0	0
ENSMUSG00000004895	Prcc	3	-	87858903	87885608	papillary renal cell carcinoma (translocation-associated) [Source:MGI Symbol;Acc:MGI:2137738]	protein_coding	1.27299	1.16588	1.19113	1.80633	3.25123	1.01231	2.69728	4.68339	1.75069	2.44497	1.46837	0.787036
ENSMUSG00000004896	Rrnad1	3	-	87922601	87930717	ribosomal RNA adenine dimethylase domain containing 1 [Source:MGI Symbol;Acc:MGI:2387197]	protein_coding	4.89668	3.72559	3.31334	5.12877	4.57192	1.55957	3.20031	5.15381	2.95502	1.61542	6.50972	5.86359
ENSMUSG00000004897	Hdgf	3	+	87906321	87916132	heparin binding growth factor [Source:MGI Symbol;Acc:MGI:1194494]	protein_coding	47.1697	35.9352	35.7968	87.6199	82.0255	74.6139	62.9379	67.8871	64.7621	73.5424	80.5581	77.8135
ENSMUSG00000004902	Slc25a18	6	+	120773578	120794336	solute carrier family 25 (mitochondrial carrier), member 18 [Source:MGI Symbol;Acc:MGI:1919053]	protein_coding	0.306694	0.335944	0.214945	0.198074	0.390495	0.222069	0.678472	0.917287	1.04956	0.35777	0	0
ENSMUSG00000004929	Thop1	10	+	81070035	81082559	thimet oligopeptidase 1 [Source:MGI Symbol;Acc:MGI:1354165]	protein_coding	2.16287	1.6766	1.78242	8.68058	10.7038	4.74047	3.22745	3.5158	3.83582	5.0693	5.93805	3.53785
ENSMUSG00000004931	Apba3	10	+	81266960	81273246	amyloid beta (A4) precursor protein-binding, family A, member 3 [Source:MGI Symbol;Acc:MGI:1888527]	protein_coding	7.33997	7.2404	7.22831	11.5435	13.7516	10.1627	12.3936	6.82141	10.0326	15.3565	15.0582	2.61007
ENSMUSG00000004933	Matk	10	+	81252935	81263365	megakaryocyte-associated tyrosine kinase [Source:MGI Symbol;Acc:MGI:99259]	protein_coding	0.326543	0.379908	0.271435	1.41989	0.175625	0.444297	1.3245	4.33749	1.50757	2.51035	0.703788	0
ENSMUSG00000004934	Pias4	10	-	81153266	81167923	protein inhibitor of activated STAT 4 [Source:MGI Symbol;Acc:MGI:2136940]	protein_coding	9.99441	8.60171	9.03221	15.0574	12.6826	12.9658	15.7283	18.2943	18.2268	21.2775	18.7307	22.5355
ENSMUSG00000004936	Map2k1	9	-	64185770	64253631	mitogen-activated protein kinase kinase 1 [Source:MGI Symbol;Acc:MGI:1346866]	protein_coding	44.7986	33.7859	32.8232	28.8995	46.4742	21.3532	14.7912	12.2591	16.3932	12.5602	5.49269	6.21155
ENSMUSG00000004937	Sgta	10	-	81044075	81060181	small glutamine-rich tetratricopeptide repeat (TPR)-containing, alpha [Source:MGI Symbol;Acc:MGI:1098703]	protein_coding	30.8169	27.0472	25.8733	35.4446	35.472	30.3018	18.0026	17.235	14.7879	17.4865	17.92	11.3494
ENSMUSG00000004939	Nmrk2	10	-	81198170	81202051	nicotinamide riboside kinase 2 [Source:MGI Symbol;Acc:MGI:1916814]	protein_coding	0	0	0	0.171114	0.332316	0	0	0.181603	0	0	0.1368	0
ENSMUSG00000004945	Tmem242	17	-	5410870	5440259	transmembrane protein 242 [Source:MGI Symbol;Acc:MGI:1917794]	protein_coding	73.2423	73.9374	69.1343	75.653	77.8505	62.6097	27.9346	23.9684	25.7042	13.2666	15.1462	29.3162
ENSMUSG00000004947	Dtx2	5	+	135994800	136032872	deltex 2, E3 ubiquitin ligase [Source:MGI Symbol;Acc:MGI:1921448]	protein_coding	0.873948	1.0907	1.04031	2.08703	1.87515	0.604927	1.61313	0.983655	1.95983	0.652179	1.09804	1.00041
ENSMUSG00000004948	Zp3	5	+	135980099	135988624	zona pellucida glycoprotein 3 [Source:MGI Symbol;Acc:MGI:99215]	protein_coding	0	0	0	0	0.185682	0	0.304107	1.13227	0	0	0	5.00606
ENSMUSG00000004951	Hspb1	5	+	135887919	135889563	heat shock protein 1 [Source:MGI Symbol;Acc:MGI:96240]	protein_coding	0.088018	0.511816	0	0.128734	0.060374	0	0.442987	1.22961	0	0	0.981359	0
ENSMUSG00000004952	Rasa4	5	+	136083916	136111860	RAS p21 protein activator 4 [Source:MGI Symbol;Acc:MGI:1858600]	protein_coding	0.293135	0.035654	0.612639	0.467171	1.17552	1.47755	0.646106	0.848622	0.442589	0.860787	0.669077	1.77042
ENSMUSG00000004961	Syt5	7	-	4539765	4547541	synaptotagmin V [Source:MGI Symbol;Acc:MGI:1926368]	protein_coding	0	0	0	0	0.024647	0	0	0	1.63373	0	0	0
ENSMUSG00000004980	Hnrnpa2b1	6	-	51460932	51469894	heterogeneous nuclear ribonucleoprotein A2/B1 [Source:MGI Symbol;Acc:MGI:104819]	protein_coding	435.808	364.924	358.322	438.424	325.893	368.308	311.025	249.753	231.182	233.132	218.761	235.067
ENSMUSG00000004988	Fxyd4	6	-	117933559	117937692	FXYD domain-containing ion transport regulator 4 [Source:MGI Symbol;Acc:MGI:1889005]	protein_coding	0.198038	0.29903	0	0	0	0.144098	0	0.338863	0	0	0.269816	0
ENSMUSG00000004994	Ccdc130	8	-	84257795	84270380	coiled-coil domain containing 130 [Source:MGI Symbol;Acc:MGI:1914986]	protein_coding	19.3236	16.2541	16.3588	19.4642	10.3406	10.9388	10.2911	11.7922	9.85015	2.48231	3.218	1.15343
ENSMUSG00000004996	Mri1	8	-	84249906	84257326	methylthioribose-1-phosphate isomerase 1 [Source:MGI Symbol;Acc:MGI:1915123]	protein_coding	8.62416	7.68201	7.90519	14.7578	12.4511	17.1895	7.44111	6.11222	7.10478	6.08948	6.6143	4.39115
ENSMUSG00000005034	Prkacb	3	-	146729574	146812990	protein kinase, cAMP dependent, catalytic, beta [Source:MGI Symbol;Acc:MGI:97594]	protein_coding	8.55318	7.58768	7.11337	9.13245	7.96968	10.3655	10.1153	10.3693	10.5132	10.1493	10.2586	6.70457
ENSMUSG00000005043	Sgsh	11	-	119343425	119355536	N-sulfoglucosamine sulfohydrolase (sulfamidase) [Source:MGI Symbol;Acc:MGI:1350341]	protein_coding	1.00506	0.689598	1.46414	0.570411	0.061005	0.914791	0.328889	0.276542	0.335649	0.298517	0.265091	0.116597
ENSMUSG00000005045	Chd5	4	+	152338651	152390194	chromodomain helicase DNA binding protein 5 [Source:MGI Symbol;Acc:MGI:3036258]	protein_coding	0.032708	0.015915	0.049211	0	0	0.274481	0.489867	0.539274	0.280032	0	2.22768	0.153125
ENSMUSG00000005054	Cstb	10	+	78425669	78427622	cystatin B [Source:MGI Symbol;Acc:MGI:109514]	protein_coding	578.978	773.382	725.505	538.151	614.246	653.018	174.466	191.038	161.151	117.676	116.39	54.6894
ENSMUSG00000005057	Sh2b2	5	-	136218147	136246556	SH2B adaptor protein 2 [Source:MGI Symbol;Acc:MGI:1345171]	protein_coding	6.73195	5.29474	5.73724	6.87318	9.05599	9.13668	11.0202	10.7675	8.96594	4.33122	4.72955	6.8622
ENSMUSG00000005069	Pex5	6	-	124396816	124415067	peroxisomal biogenesis factor 5 [Source:MGI Symbol;Acc:MGI:1098808]	protein_coding	7.2036	6.08167	5.57516	9.81784	7.60735	13.4023	6.08024	6.02316	2.55318	6.62415	4.07392	2.37404
ENSMUSG00000005078	Jkamp	12	+	72085589	72101461	JNK1/MAPK8-associated membrane protein [Source:MGI Symbol;Acc:MGI:1915057]	protein_coding	31.0109	33.0064	34.9321	35.6888	30.9488	27.7972	16.0556	16.8699	20.0848	13.171	17.838	16.3111
ENSMUSG00000005087	Cd44	2	-	102811141	102901665	CD44 antigen [Source:MGI Symbol;Acc:MGI:88338]	protein_coding	108.498	95.1139	88.152	45.7385	47.88	41.9223	52.5433	69.9663	64.9011	34.7033	32.4146	26.0152
ENSMUSG00000005089	Slc1a2	2	+	102658659	102790784	solute carrier family 1 (glial high affinity glutamate transporter), member 2 [Source:MGI Symbol;Acc:MGI:101931]	protein_coding	0	0.117052	0.008067	0.002247	0	0	0.010695	0.366908	0.501597	0.539017	0.125893	0.257362
ENSMUSG00000005102	Eif2ak4	2	+	118388618	118475234	eukaryotic translation initiation factor 2 alpha kinase 4 [Source:MGI Symbol;Acc:MGI:1353427]	protein_coding	5.20287	2.27584	3.90632	5.58796	2.75531	3.70451	2.69715	3.06051	2.33638	2.60301	2.28342	2.34557
ENSMUSG00000005103	Wdr1	5	-	38526813	38563221	WD repeat domain 1 [Source:MGI Symbol;Acc:MGI:1337100]	protein_coding	103.236	87.6367	71.8937	112.471	99.3634	80.7984	34.075	36.1289	32.8475	25.4709	31.4705	28.1097
ENSMUSG00000005107	Slc2a9	5	-	38349273	38503143	solute carrier family 2 (facilitated glucose transporter), member 9 [Source:MGI Symbol;Acc:MGI:2152844]	protein_coding	1.10262	2.08428	1.57681	1.21724	2.30691	2.4306	0.539359	1.75747	1.72125	0	10.4785	0.610889
ENSMUSG00000005124	Ccn4	15	+	66891320	66923201	cellular communication network factor 4 [Source:MGI Symbol;Acc:MGI:1197008]	protein_coding	0.143807	0.112601	0.030357	0	0.04519	0	0.502537	0.770364	0.527772	0.979872	1.11392	4.77048
ENSMUSG00000005125	Ndrg1	15	-	66929318	66969640	N-myc downstream regulated gene 1 [Source:MGI Symbol;Acc:MGI:1341799]	protein_coding	56.0062	48.3555	65.3169	32.4078	33.1871	38.9046	127.118	133.268	128.169	78.9042	63.206	48.3976
ENSMUSG00000005131	4930550C14Rik	9	+	53402325	53434402	RIKEN cDNA 4930550C14 gene [Source:MGI Symbol;Acc:MGI:1922561]	protein_coding	0	0	0	0	0	0.034943	0.240065	0	0	0	0	0
ENSMUSG00000005142	Man2b1	8	+	85083270	85098282	mannosidase 2, alpha B1 [Source:MGI Symbol;Acc:MGI:107286]	protein_coding	45.0682	37.5476	43.8413	27.1008	24.2712	28.5829	28.6456	32.88	25.9724	12.1436	15.6785	10.9501
ENSMUSG00000005148	Klf5	14	+	99298691	99315036	Kruppel-like factor 5 [Source:MGI Symbol;Acc:MGI:1338056]	protein_coding	3.38259	2.81176	2.63655	7.12328	11.1369	6.61724	1.85381	2.07039	2.03062	2.09492	1.60663	3.82145
ENSMUSG00000005150	Wdr83	8	-	85075035	85081306	WD repeat domain containing 83 [Source:MGI Symbol;Acc:MGI:1915086]	protein_coding	16.6073	15.0008	17.0902	28.8305	19.0826	16.1535	24.5446	19.1882	22.3608	18.8264	12.1322	26.9251
ENSMUSG00000005161	Prdx2	8	+	84969587	84974834	peroxiredoxin 2 [Source:MGI Symbol;Acc:MGI:109486]	protein_coding	60.5843	73.2317	64.2286	90.5948	106.446	87.7918	40.5293	56.0047	42.9649	45.0718	75.9873	73.6961
ENSMUSG00000005198	Polr2a	11	-	69733997	69758637	polymerase (RNA) II (DNA directed) polypeptide A [Source:MGI Symbol;Acc:MGI:98086]	protein_coding	9.3421	7.4723	5.65725	6.73787	7.71909	8.8416	7.1077	8.60503	6.06886	6.05751	8.07554	3.09114
ENSMUSG00000005202	Shbg	11	-	69614804	69617905	sex hormone binding globulin [Source:MGI Symbol;Acc:MGI:98295]	protein_coding	0	0	0	0	0	0	0	0	0	0	0	0
ENSMUSG00000005204	Senp3	11	-	69673115	69682084	SUMO/sentrin specific peptidase 3 [Source:MGI Symbol;Acc:MGI:2158736]	protein_coding	15.9974	11.928	11.353	9.49089	11.0806	15.4375	25.9534	18.8483	13.525	13.3077	8.67549	12.928
ENSMUSG00000005220	Corin	5	-	72300025	72504473	corin, serine peptidase [Source:MGI Symbol;Acc:MGI:1349451]	protein_coding	0	0	0.09919	0	0	0	0.223455	0.180258	0.083292	0.090884	0.319795	0
ENSMUSG00000005225	Plekha8	6	+	54595111	54645839	pleckstrin homology domain containing, family A (phosphoinositide binding specific) member 8 [Source:MGI Symbol;Acc:MGI:2681164]	protein_coding	0	0.053764	0.038571	0	0.030995	0.044516	0	0.139371	0.107761	0.288786	0.331971	0.662544
ENSMUSG00000005232	G6pc2	2	+	69211073	69227841	glucose-6-phosphatase, catalytic, 2 [Source:MGI Symbol;Acc:MGI:1277193]	protein_coding	0	0	0	0	0	0	0	0	0	0	0	0.131269
ENSMUSG00000005233	Spc25	2	-	69193895	69206194	SPC25, NDC80 kinetochore complex component, homolog (S. cerevisiae) [Source:MGI Symbol;Acc:MGI:1913692]	protein_coding	17.9737	16.9507	19.7078	16.5136	23.2337	9.95805	7.78125	14.2497	11.3109	14.8117	15.0134	8.17433
ENSMUSG00000005237	Dnah2	11	-	69420809	69549110	dynein, axonemal, heavy chain 2 [Source:MGI Symbol;Acc:MGI:107731]	protein_coding	0	0.076532	0	0.01402	0.017319	0.052137	0.353417	0.034083	0.058442	0.054134	0.066285	0.302824
ENSMUSG00000005251	Ripk4	16	-	97741933	97763787	receptor-interacting serine-threonine kinase 4 [Source:MGI Symbol;Acc:MGI:1919638]	protein_coding	0	0.021091	0	0	0	0	0	0	0	0	0	0
ENSMUSG00000005262	Ufd1	16	+	18811779	18835261	ubiquitin recognition factor in ER-associated degradation 1 [Source:MGI Symbol;Acc:MGI:109353]	protein_coding	55.9553	44.5845	36.6002	49.9282	51.9476	55.6251	18.941	17.2298	21.1787	12.3243	10.1419	11.5733
ENSMUSG00000005267	Zfp287	11	-	62700356	62731905	zinc finger protein 287 [Source:MGI Symbol;Acc:MGI:2176561]	protein_coding	0.076518	0.421831	0.236532	0.710108	0.235046	0.464927	0.735247	2.61386	2.05194	0.68398	1.25741	5.40207
ENSMUSG00000005268	Prlr	15	+	10177238	10349180	prolactin receptor [Source:MGI Symbol;Acc:MGI:97763]	protein_coding	0.083346	0.05966	0.247629	0.014287	0	0.014746	0.413855	0.337793	0.597407	0.771258	0.605165	1.40165
ENSMUSG00000005299	Letm1	5	-	33739673	33782817	leucine zipper-EF-hand containing transmembrane protein 1 [Source:MGI Symbol;Acc:MGI:1932557]	protein_coding	4.16708	3.90757	3.8904	6.5915	7.99511	5.89704	9.47675	8.91828	8.89889	3.87013	7.29389	5.81615
ENSMUSG00000005312	Ubqln1	13	-	58176156	58215653	ubiquilin 1 [Source:MGI Symbol;Acc:MGI:1860276]	protein_coding	29.3603	19.8688	17.2702	22.1307	32.3073	21.7743	12.4151	10.8441	11.9388	8.68779	5.89058	5.5655
ENSMUSG00000005320	Fgfr4	13	+	55152640	55168759	fibroblast growth factor receptor 4 [Source:MGI Symbol;Acc:MGI:95525]	protein_coding	0.09033	0.107846	0.047164	0	0	0.370213	0.0514	0	0.037781	0	0	0
ENSMUSG00000005338	Cadm3	1	-	173333258	173367695	cell adhesion molecule 3 [Source:MGI Symbol;Acc:MGI:2137858]	protein_coding	0	0	0	0	0	0	0	0.222249	0.570109	0.637006	0.666609	0
ENSMUSG00000005339	Fcer1a	1	-	173221284	173227214	Fc receptor, IgE, high affinity I, alpha polypeptide [Source:MGI Symbol;Acc:MGI:95494]	protein_coding	2.3996	2.13211	1.02223	46.1358	33.8667	39.1774	0	0.271988	0	0	0	0.469442
ENSMUSG00000005354	Txn2	15	-	77915047	77929006	thioredoxin 2 [Source:MGI Symbol;Acc:MGI:1929468]	protein_coding	118.636	127.336	102.759	172.519	175.75	178.329	51.645	61.4978	54.9635	39.0279	36.6729	50.4789
ENSMUSG00000005355	Casp14	10	-	78711991	78718294	caspase 14 [Source:MGI Symbol;Acc:MGI:1335092]	protein_coding	0.102072	0	0	0	0	0	0	0	0	0	0	0
ENSMUSG00000005357	Slc1a6	10	+	78780496	78814765	solute carrier family 1 (high affinity aspartate/glutamate transporter), member 6 [Source:MGI Symbol;Acc:MGI:1096331]	protein_coding	0	0	0	0	0	0	0	0	0.191515	0	0	0
ENSMUSG00000005360	Slc1a3	15	-	8634124	8710764	solute carrier family 1 (glial high affinity glutamate transporter), member 3 [Source:MGI Symbol;Acc:MGI:99917]	protein_coding	0	0.128082	0.029623	0	0	0.034853	0.939266	1.85419	3.69292	4.2708	2.96525	6.04686
ENSMUSG00000005362	Crbn	6	-	106780201	106800077	cereblon [Source:MGI Symbol;Acc:MGI:1913277]	protein_coding	28.5331	21.5481	16.1065	18.2248	28.8833	16.4288	6.32111	5.38091	8.56879	3.16834	6.05501	4.20988
ENSMUSG00000005364	Il5ra	6	-	106710357	106749037	interleukin 5 receptor, alpha [Source:MGI Symbol;Acc:MGI:96558]	protein_coding	0	0	0	0	0.009125	0	0	0	0	0	0	0
ENSMUSG00000005370	Msh6	17	+	87975062	87990892	mutS homolog 6 [Source:MGI Symbol;Acc:MGI:1343961]	protein_coding	4.53008	4.1308	4.77143	6.48133	3.1743	6.27147	9.55268	6.06065	7.30007	6.21062	7.87638	4.82325
ENSMUSG00000005371	Fbxo11	17	-	87990859	88065291	F-box protein 11 [Source:MGI Symbol;Acc:MGI:2147134]	protein_coding	8.28963	7.15447	7.34343	5.52011	11.3056	8.51443	6.48766	4.98717	4.71628	7.95078	5.61742	3.99001
ENSMUSG00000005373	Mlxipl	5	+	135089890	135138382	MLX interacting protein-like [Source:MGI Symbol;Acc:MGI:1927999]	protein_coding	1.68349	0.950004	0.936775	0.517231	0.345164	0.089147	0.527251	0.870499	0.580092	0.190329	0.768742	0
ENSMUSG00000005374	Tbl2	5	+	135149657	135165760	transducin (beta)-like 2 [Source:MGI Symbol;Acc:MGI:1351652]	protein_coding	1.92916	1.46655	1.77545	1.09897	2.42921	2.33829	2.35917	3.25955	2.56105	3.71039	3.23266	1.00811
ENSMUSG00000005378	Bud23	5	-	135052957	135064959	BUD23, rRNA methyltransferase and ribosome maturation factor [Source:MGI Symbol;Acc:MGI:1913388]	protein_coding	26.6444	19.0567	20.7142	36.5161	32.7887	27.288	36.1442	33.0999	34.6436	10.3961	9.29236	4.36957
ENSMUSG00000005397	Nid1	13	+	13437551	13512269	nidogen 1 [Source:MGI Symbol;Acc:MGI:97342]	protein_coding	0	0	0	0.010201	0	0	0	0	0	0.568223	0	0.151364
ENSMUSG00000005410	Mcm5	8	+	75109569	75128439	minichromosome maintenance complex component 5 [Source:MGI Symbol;Acc:MGI:103197]	protein_coding	9.64712	6.07648	8.19223	18.1496	16.4999	16.2426	19.9075	19.3222	17.1491	23.3613	22.4739	18.708
ENSMUSG00000005413	Hmox1	8	+	75093621	75100589	heme oxygenase 1 [Source:MGI Symbol;Acc:MGI:96163]	protein_coding	38.7954	31.251	29.608	27.9913	35.995	22.5471	24.4098	19.0411	22.1148	6.16023	7.00913	3.16092
ENSMUSG00000005417	Mprip	11	+	59661305	59780860	myosin phosphatase Rho interacting protein [Source:MGI Symbol;Acc:MGI:1349438]	protein_coding	4.37037	2.89079	4.35636	7.32165	5.5929	4.42972	2.69447	4.03567	4.69468	3.40704	2.24019	1.601
ENSMUSG00000005442	Cic	7	+	25267704	25294159	capicua transcriptional repressor [Source:MGI Symbol;Acc:MGI:1918972]	protein_coding	0.943773	2.27613	1.65348	5.11645	2.66248	1.43102	10.0348	19.5631	4.50477	1.90967	5.40331	7.60895
ENSMUSG00000005447	Pafah1b3	7	-	25295049	25297986	platelet-activating factor acetylhydrolase, isoform 1b, subunit 3 [Source:MGI Symbol;Acc:MGI:108414]	protein_coding	0	1.19226	1.62654	4.01018	2.01219	5.1602	0.659871	0.7345	1.24228	0	0	0
ENSMUSG00000005465	Il27ra	8	-	84030294	84042589	interleukin 27 receptor, alpha [Source:MGI Symbol;Acc:MGI:1355318]	protein_coding	0.038667	0	0	1.08335	0	0	0	0	0	0.393484	0	0.166684
ENSMUSG00000005469	Prkaca	8	+	83972993	83996443	protein kinase, cAMP dependent, catalytic, alpha [Source:MGI Symbol;Acc:MGI:97592]	protein_coding	14.2079	14.5743	10.3705	17	15.4669	13.909	10.0149	8.35573	7.6793	9.14709	4.41805	6.46386
ENSMUSG00000005470	Asf1b	8	+	83955507	83970197	anti-silencing function 1B histone chaperone [Source:MGI Symbol;Acc:MGI:1914179]	protein_coding	38.4169	26.6979	21.1633	31.2999	47.465	40.9073	9.76904	12.4809	12.3833	23.0989	8.43388	15.1712
ENSMUSG00000005474	Myl10	5	+	136693146	136701094	myosin, light chain 10, regulatory [Source:MGI Symbol;Acc:MGI:1891705]	protein_coding	0	0	0	0	0	0	0	0	0	0	0	0
ENSMUSG00000005481	Ddx39	8	+	83715177	83726892	DEAD (Asp-Glu-Ala-Asp) box polypeptide 39 [Source:MGI Symbol;Acc:MGI:1915528]	protein_coding	83.7699	68.9371	74.9544	229.64	204.664	185.551	46.8702	60.6168	33.4251	48.406	53.9854	30.9397
ENSMUSG00000005483	Dnajb1	8	+	83608193	83612653	DnaJ heat shock protein family (Hsp40) member B1 [Source:MGI Symbol;Acc:MGI:1931874]	protein_coding	37.7141	32.8349	28.9736	36.579	42.4028	36.0793	23.0146	21.6447	21.404	9.46146	11.5287	9.68967
ENSMUSG00000005493	Msh4	3	-	153857149	153906138	mutS homolog 4 [Source:MGI Symbol;Acc:MGI:1860077]	protein_coding	0	0	0	0.099374	0	0	0	0.302364	0.676614	1.23963	0	3.25891
ENSMUSG00000005501	Usp40	1	-	87945119	88008551	ubiquitin specific peptidase 40 [Source:MGI Symbol;Acc:MGI:2443184]	protein_coding	2.71366	1.88873	2.93054	1.10171	1.39228	0.821411	4.08768	4.65866	5.78071	8.24493	5.04617	20.5473
ENSMUSG00000005503	Evx1	6	+	52313498	52318378	even-skipped homeobox 1 [Source:MGI Symbol;Acc:MGI:95461]	protein_coding	0	0	0	0	0	0	0	0	0	0	0	0
ENSMUSG00000005505	Kbtbd4	2	+	90904740	90911626	kelch repeat and BTB (POZ) domain containing 4 [Source:MGI Symbol;Acc:MGI:1914386]	protein_coding	3.65579	2.72376	2.07292	4.74646	6.57705	0.038216	0.731641	0.029894	0.52782	0	0	0
ENSMUSG00000005506	Celf1	2	+	90940382	91019497	CUGBP, Elav-like family member 1 [Source:MGI Symbol;Acc:MGI:1342295]	protein_coding	5.75564	4.51198	6.39435	7.00757	6.17101	9.41617	7.81301	6.54696	5.95276	7.19313	6.33745	8.0295
ENSMUSG00000005510	Ndufs3	2	-	90894634	90904827	NADH:ubiquinone oxidoreductase core subunit S3 [Source:MGI Symbol;Acc:MGI:1915599]	protein_coding	57.946	61.3572	55.6724	77.9788	73.7072	69.2189	39.2299	41.9195	28.8259	36.6139	45.7015	18.7505
ENSMUSG00000005514	Por	5	+	135670033	135735326	P450 (cytochrome) oxidoreductase [Source:MGI Symbol;Acc:MGI:97744]	protein_coding	27.1389	24.4252	32.7623	24.9086	16.4691	15.4225	27.7249	27.9487	26.5981	17.325	12.5265	14.9227
ENSMUSG00000005533	Igf1r	7	+	67952827	68233668	insulin-like growth factor I receptor [Source:MGI Symbol;Acc:MGI:96433]	protein_coding	12.0945	11.5463	12.9399	6.3663	8.50231	9.17177	16.8628	21.6766	15.272	11.4877	11.7	11.2767
ENSMUSG00000005534	Insr	8	-	3122061	3279617	insulin receptor [Source:MGI Symbol;Acc:MGI:96575]	protein_coding	14.9264	11.8467	14.6369	9.87095	7.81226	6.25734	7.00572	5.69387	7.08398	5.55425	3.91727	4.97795
ENSMUSG00000005540	Fcer2a	8	-	3681737	3694175	Fc receptor, IgE, low affinity II, alpha polypeptide [Source:MGI Symbol;Acc:MGI:95497]	protein_coding	0	0	0	0	0	0	0	0.272412	0.202505	1.64243	0	0.620185
ENSMUSG00000005547	Cyp2a5	7	+	26835305	26843548	cytochrome P450, family 2, subfamily a, polypeptide 5 [Source:MGI Symbol;Acc:MGI:88597]	protein_coding	0.210871	0.55484	0.294437	1.81053	0	0.458881	0	0.679247	0	0	0	0
ENSMUSG00000005553	Atp4a	7	+	30712209	30725534	ATPase, H+/K+ exchanging, gastric, alpha polypeptide [Source:MGI Symbol;Acc:MGI:88113]	protein_coding	0	0	0	0	0	0.248626	0	0	0.069721	0	0	0
ENSMUSG00000005566	Trim28	7	+	12999114	13031035	tripartite motif-containing 28 [Source:MGI Symbol;Acc:MGI:109274]	protein_coding	15.9098	14.8981	20.7284	35.7681	25.4764	23.4876	19.2905	21.4199	21.0685	19.0372	33.5678	41.9609
ENSMUSG00000005575	Ube2m	7	-	13035120	13038275	ubiquitin-conjugating enzyme E2M [Source:MGI Symbol;Acc:MGI:108278]	protein_coding	54.1228	54.0963	49.5187	76.9124	70.1581	84.4737	31.9073	35.6671	28.7507	25.6301	24.4292	20.7919
ENSMUSG00000005580	Adcy9	16	-	4287529	4420498	adenylate cyclase 9 [Source:MGI Symbol;Acc:MGI:108450]	protein_coding	0.66923	0.863616	0.507456	1.81764	0.356503	0	0.904718	0.998706	1.37273	0.534133	0.635164	0.592756
ENSMUSG00000005583	Mef2c	13	+	83504034	83667080	myocyte enhancer factor 2C [Source:MGI Symbol;Acc:MGI:99458]	protein_coding	0.945888	0.718987	0.740835	1.20609	0.824545	2.0059	4.78195	3.64837	7.99096	7.50265	2.52233	7.26527
ENSMUSG00000005609	Ctr9	7	+	111028951	111056377	CTR9 homolog, Paf1/RNA polymerase II complex component [Source:MGI Symbol;Acc:MGI:109345]	protein_coding	11.018	11.8523	10.2076	10.4895	14.3028	11.8948	23.3725	23.3507	22.3553	22.8459	17.3896	27.4677
ENSMUSG00000005610	Eif4g2	7	-	111067750	111083030	eukaryotic translation initiation factor 4, gamma 2 [Source:MGI Symbol;Acc:MGI:109207]	protein_coding	84.7027	67.9675	56.0487	90.3649	88.0872	101.76	46.2136	41.7325	47.1021	45.5163	51.3313	42.9457
ENSMUSG00000005611	Mrvi1	7	-	110868266	110982461	MRV integration site 1 [Source:MGI Symbol;Acc:MGI:1338023]	protein_coding	3.52048	3.20576	4.49491	1.26244	3.34285	0.785224	2.01288	2.35214	1.92504	0.607062	0.264428	0.639322
ENSMUSG00000005615	Pcyt1a	16	+	32430921	32475070	phosphate cytidylyltransferase 1, choline, alpha isoform [Source:MGI Symbol;Acc:MGI:88557]	protein_coding	18.8724	15.4797	12.9437	11.5952	10.8821	10.097	18.9592	20.5738	15.3998	13.125	8.50608	12.4327
ENSMUSG00000005621	Zfp592	7	+	80993681	81045164	zinc finger protein 592 [Source:MGI Symbol;Acc:MGI:2443541]	protein_coding	2.17642	1.77719	2.76653	1.41285	2.05153	1.64058	2.92395	3.32865	4.05206	1.72365	1.13321	1.54478
ENSMUSG00000005625	Psmd4	3	-	95032694	95042614	proteasome (prosome, macropain) 26S subunit, non-ATPase, 4 [Source:MGI Symbol;Acc:MGI:1201670]	protein_coding	108.986	100.196	94.9637	104.624	107.453	86.8073	72.5406	80.8764	72.5154	90.8555	68.9731	71.5136
ENSMUSG00000005628	Tmod4	3	+	95124476	95129209	tropomodulin 4 [Source:MGI Symbol;Acc:MGI:1355285]	protein_coding	5.16029	1.74634	2.83764	0.20997	0.082713	3.5158	7.71653	4.80471	4.65758	0.670401	0	0.789947
ENSMUSG00000005640	Insrr	3	+	87796951	87816101	insulin receptor-related receptor [Source:MGI Symbol;Acc:MGI:1346037]	protein_coding	0	0	0	0	0	0	0	0	0	0	0	0
ENSMUSG00000005649	Cabp5	7	+	13398132	13408887	calcium binding protein 5 [Source:MGI Symbol;Acc:MGI:1352746]	protein_coding	0	0	0	0	0	0	0	0.294132	0	0	0	0
ENSMUSG00000005656	Snx6	12	-	54746349	54795703	sorting nexin 6 [Source:MGI Symbol;Acc:MGI:1919433]	protein_coding	83.0887	90.5935	72.4149	92.5708	108.717	79.9225	35.5512	52.5249	47.8617	23.6116	36.3465	36.5203
ENSMUSG00000005667	Mthfd2	6	-	83305691	83325908	methylenetetrahydrofolate dehydrogenase (NAD+ dependent), methenyltetrahydrofolate cyclohydrolase [Source:MGI Symbol;Acc:MGI:1338850]	protein_coding	12.7451	13.0057	9.98659	48.5335	45.6526	48.5714	23.8373	27.5742	24.7997	18.2654	34.4465	26.2247
ENSMUSG00000005672	Kit	5	+	75574916	75656722	KIT proto-oncogene receptor tyrosine kinase [Source:MGI Symbol;Acc:MGI:96677]	protein_coding	4.03889	2.16798	2.67632	3.68063	6.14099	5.60768	3.58551	3.22177	1.99818	2.86256	2.76516	3.23314
ENSMUSG00000005674	Tomm40l	1	-	171216011	171222514	translocase of outer mitochondrial membrane 40-like [Source:MGI Symbol;Acc:MGI:3589112]	protein_coding	1.4495	2.28952	1.82858	3.55629	3.87279	3.36865	2.52359	2.29494	1.90048	1.37925	1.7386	0
ENSMUSG00000005677	Nr1i3	1	+	171213970	171220701	nuclear receptor subfamily 1, group I, member 3 [Source:MGI Symbol;Acc:MGI:1346307]	protein_coding	0.091309	0.014447	0.000159	0.063447	0.001446	0.067113	0.14846	0.180934	0	0	0.308492	0
ENSMUSG00000005681	Apoa2	1	+	171225054	171226379	apolipoprotein A-II [Source:MGI Symbol;Acc:MGI:88050]	protein_coding	0.746725	4.1778	7.45915	0	0	0	0	0	0	0	0	0
ENSMUSG00000005682	Pan2	10	+	128303335	128321358	PAN2 poly(A) specific ribonuclease subunit [Source:MGI Symbol;Acc:MGI:1918984]	protein_coding	5.98476	3.68702	4.59244	6.42323	3.47713	4.27936	6.56532	3.89818	4.99962	2.65782	3.86039	6.81078
ENSMUSG00000005683	Cs	10	+	128337734	128362479	citrate synthase [Source:MGI Symbol;Acc:MGI:88529]	protein_coding	35.3833	31.9299	34.8334	56.9427	44.4748	58.9911	31.08	31.2684	31.5223	26.9547	31.4254	13.0145
ENSMUSG00000005686	Ampd3	7	+	110768206	110812405	adenosine monophosphate deaminase 3 [Source:MGI Symbol;Acc:MGI:1096344]	protein_coding	11.6056	8.98801	11.1911	7.52217	4.81115	6.13614	7.65577	3.36108	4.43411	2.53914	3.13033	0.744658
ENSMUSG00000005687	Bcas2	3	+	103171655	103179166	breast carcinoma amplified sequence 2 [Source:MGI Symbol;Acc:MGI:1915433]	protein_coding	47.8374	55.6713	43.7303	86.9964	56.4404	82.0374	36.0533	30.8947	26.5562	21.5256	30.9376	19.7626
ENSMUSG00000005696	Sh2d1a	X	+	42502453	42529330	SH2 domain containing 1A [Source:MGI Symbol;Acc:MGI:1328352]	protein_coding	0	0.093712	0	0.500844	0	0	0.581147	0.946551	0.818145	1.87857	1.35893	2.06646
ENSMUSG00000005698	Ctcf	8	+	105636568	105682922	CCCTC-binding factor [Source:MGI Symbol;Acc:MGI:109447]	protein_coding	26.8862	23.9925	30.6039	22.0682	20.0036	20.3756	43.5669	49.2677	52.533	32.4724	31.6338	30.6538
ENSMUSG00000005699	Pard6a	8	+	105701148	105703496	par-6 family cell polarity regulator alpha [Source:MGI Symbol;Acc:MGI:1927223]	protein_coding	4.84752	7.58735	6.23573	7.51189	3.70124	9.80438	3.4738	5.49299	4.57386	9.53961	3.7378	1.71027
ENSMUSG00000005705	Agrp	8	-	105566698	105637393	agouti related neuropeptide [Source:MGI Symbol;Acc:MGI:892013]	protein_coding	0.059672	0.340309	0	0	0	0.217134	0	0.194627	0	0	0	0
ENSMUSG00000005716	Pvalb	15	-	78191114	78206400	parvalbumin [Source:MGI Symbol;Acc:MGI:97821]	protein_coding	0	0	0	0.33292	0	0	0	0.209853	0	0	0	0
ENSMUSG00000005718	Tfap4	16	-	4544661	4559854	transcription factor AP4 [Source:MGI Symbol;Acc:MGI:103239]	protein_coding	0.967219	1.2689	1.39967	2.40972	2.1804	1.52679	3.63135	3.0885	3.90115	3.64558	2.62922	4.85918
ENSMUSG00000005732	Ranbp1	16	-	18239784	18248732	RAN binding protein 1 [Source:MGI Symbol;Acc:MGI:96269]	protein_coding	169.228	192.635	164.535	347.358	342.546	337.306	156.503	165.256	153.634	112.769	127.726	107.988
ENSMUSG00000005763	Cd247	1	+	165788681	165877277	CD247 antigen [Source:MGI Symbol;Acc:MGI:88334]	protein_coding	0	0	0.293118	1.15406	0	0	0	0	0.151114	0	0	0
ENSMUSG00000005774	Rfx5	3	+	94954075	94961561	regulatory factor X, 5 (influences HLA class II expression) [Source:MGI Symbol;Acc:MGI:1858421]	protein_coding	1.08502	1.57782	1.09854	1.26038	1.36558	1.13779	1.38611	0.893248	0.52395	0.368217	0	1.00024
ENSMUSG00000005779	Psmb4	3	-	94884093	94886961	proteasome (prosome, macropain) subunit, beta type 4 [Source:MGI Symbol;Acc:MGI:1098257]	protein_coding	77.9178	96.9113	111.527	130.547	127.147	145.378	98.9877	127.966	135.575	147.045	170.153	119.828
ENSMUSG00000005800	Mmp8	9	+	7558456	7568485	matrix metallopeptidase 8 [Source:MGI Symbol;Acc:MGI:1202395]	protein_coding	3.71332	4.51205	2.35113	0.02999	2.87005	0	1.31649	1.11757	1.52698	5.11465	3.7288	5.26753
ENSMUSG00000005802	Slc30a4	2	-	122681233	122702663	solute carrier family 30 (zinc transporter), member 4 [Source:MGI Symbol;Acc:MGI:1345282]	protein_coding	0.052208	0	0.176237	0.053928	0	0.113493	0.320607	0.648912	0.710785	4.07113	3.05659	5.00411
ENSMUSG00000005803	Sqor	2	+	122765237	122809569	sulfide quinone oxidoreductase [Source:MGI Symbol;Acc:MGI:1929899]	protein_coding	81.0864	71.9155	72.1359	89.9164	76.5878	105.726	54.9902	50.8975	46.3416	36.1625	29.0536	30.5696
ENSMUSG00000005804	Bloc1s6	2	+	122738503	122749475	biogenesis of lysosomal organelles complex-1, subunit 6, pallidin [Source:MGI Symbol;Acc:MGI:1927580]	protein_coding	8.74964	6.95469	8.31661	10.3465	10.171	5.59305	7.99733	4.89643	7.0121	14.0054	1.89597	1.99009
ENSMUSG00000005813	Metap1	3	-	138458956	138489515	methionyl aminopeptidase 1 [Source:MGI Symbol;Acc:MGI:1922874]	protein_coding	10.5826	11.9994	11.7436	12.1358	14.4037	19.7742	8.41254	7.46251	7.54675	8.15563	9.67097	9.25047
ENSMUSG00000005823	Gpr108	17	-	57234635	57248446	G protein-coupled receptor 108 [Source:MGI Symbol;Acc:MGI:1925558]	protein_coding	16.951	15.436	17.7312	16.9569	23.7228	15.9749	12.6066	13.3419	9.89267	5.49573	6.8565	5.71972
ENSMUSG00000005824	Tnfsf14	17	-	57189492	57194177	tumor necrosis factor (ligand) superfamily, member 14 [Source:MGI Symbol;Acc:MGI:1355317]	protein_coding	1.56908	1.64885	1.68165	3.45324	2.31215	1.55864	0.938462	1.95783	1.26577	1.25335	0.779878	0
ENSMUSG00000005836	Gata6	18	+	11052064	11085635	GATA binding protein 6 [Source:MGI Symbol;Acc:MGI:107516]	protein_coding	0	0.032948	0	0	0	0	0	0	1.51412	0.291236	0	9.39704
ENSMUSG00000005846	Rsl1d1	16	-	11192970	11203331	ribosomal L1 domain containing 1 [Source:MGI Symbol;Acc:MGI:1913659]	protein_coding	58.0504	50.6694	47.3495	91.6012	82.6213	76.7854	61.3819	55.7142	59.9407	53.8214	62.7863	35.324
ENSMUSG00000005864	Cnga2	X	+	71991849	72010218	cyclic nucleotide gated channel alpha 2 [Source:MGI Symbol;Acc:MGI:108040]	protein_coding	0	0	0	0.012148	0	0	0	0	0	0.503683	0	0
ENSMUSG00000005871	Apc	18	+	34220924	34322552	APC, WNT signaling pathway regulator [Source:MGI Symbol;Acc:MGI:88039]	protein_coding	3.10092	1.67449	1.94818	1.5169	2.13234	1.58969	5.10607	2.48015	2.88656	1.15253	1.46384	1.33401
ENSMUSG00000005873	Reep5	18	-	34344885	34374070	receptor accessory protein 5 [Source:MGI Symbol;Acc:MGI:1270152]	protein_coding	20.1938	25.0636	24.3494	36.9542	34.13	33.3023	25.9362	26.161	26.3624	18.5022	22.8699	15.2826
ENSMUSG00000005881	Ergic3	2	+	156008045	156018279	ERGIC and golgi 3 [Source:MGI Symbol;Acc:MGI:1913616]	protein_coding	65.9673	68.7275	67.3844	85.5722	103.684	79.4953	49.7065	52.9105	43.3133	45.4515	47.2339	79.3514
ENSMUSG00000005882	Uqcc1	2	-	155846894	155930310	ubiquinol-cytochrome c reductase complex assembly factor 1 [Source:MGI Symbol;Acc:MGI:1929472]	protein_coding	6.38513	4.33052	3.93495	8.3034	3.17188	5.07999	3.49302	3.66912	4.11273	2.7705	0.847664	3.25156
ENSMUSG00000005883	Spo11	2	+	172977700	172993576	SPO11 meiotic protein covalently bound to DSB [Source:MGI Symbol;Acc:MGI:1349669]	protein_coding	0	0	0	0	0	0	0	0	0	0	0.077319	0
ENSMUSG00000005886	Ncoa2	1	-	13139105	13374083	nuclear receptor coactivator 2 [Source:MGI Symbol;Acc:MGI:1276533]	protein_coding	5.58704	4.96138	3.54683	2.69128	2.58448	2.168	5.07026	8.29262	11.5347	5.8758	8.51224	4.64796
ENSMUSG00000005891	Prl4a1	13	+	28016212	28023559	prolactin family 4, subfamily a, member 1 [Source:MGI Symbol;Acc:MGI:1206587]	protein_coding	0	0	0	0	0	0	0	0	0	0	0	0
ENSMUSG00000005892	Trh	6	-	92242061	92244650	thyrotropin releasing hormone [Source:MGI Symbol;Acc:MGI:98823]	protein_coding	0	0	0	0	0	0	0	0.231079	0	0	0	0
ENSMUSG00000005893	Nr2c2	6	+	92091390	92174294	nuclear receptor subfamily 2, group C, member 2 [Source:MGI Symbol;Acc:MGI:1352466]	protein_coding	11.0436	4.83718	4.74581	3.24527	2.48742	2.74741	4.33474	5.99382	5.97785	8.32498	3.10155	2.48677
ENSMUSG00000005897	Nr2c1	10	+	94148023	94197211	nuclear receptor subfamily 2, group C, member 1 [Source:MGI Symbol;Acc:MGI:1352465]	protein_coding	1.83028	1.64034	1.61651	2.40362	1.73658	2.71612	1.00699	1.72569	1.00269	2.27669	2.36224	2.725
ENSMUSG00000005899	Smpd4	16	+	17619354	17644828	sphingomyelin phosphodiesterase 4 [Source:MGI Symbol;Acc:MGI:1924876]	protein_coding	1.79545	1.52642	1.40322	2.12944	2.6625	4.3468	3.90622	4.23549	1.55853	2.2629	7.07086	5.80188
ENSMUSG00000005907	Pex1	5	+	3596066	3637232	peroxisomal biogenesis factor 1 [Source:MGI Symbol;Acc:MGI:1918632]	protein_coding	4.93403	4.02771	4.72001	3.14778	1.37104	8.26688	6.35723	10.5031	5.91724	5.01245	9.7098	8.04256
ENSMUSG00000005917	Otx1	11	-	21994764	22002897	orthodenticle homeobox 1 [Source:MGI Symbol;Acc:MGI:97450]	protein_coding	0	0	0	0	0	0	0.055135	0	0.078008	0	0.078945	0
ENSMUSG00000005936	Kctd20	17	+	28951950	28969549	potassium channel tetramerisation domain containing 20 [Source:MGI Symbol;Acc:MGI:1914239]	protein_coding	47.7259	39.3669	38.1347	42.8945	42.0908	46.4616	24.8663	28.8421	28.0413	20.8532	19.7735	21.6694
ENSMUSG00000005947	Itgae	11	+	73090583	73147446	integrin alpha E, epithelial-associated [Source:MGI Symbol;Acc:MGI:1298377]	protein_coding	0.182749	0	0.161652	0	0	0.12723	0.041568	0.042057	0.227705	0	0	0
ENSMUSG00000005949	Ctns	11	-	73183596	73199042	cystinosis, nephropathic [Source:MGI Symbol;Acc:MGI:1932872]	protein_coding	11.2904	11.8011	8.01512	10.4541	9.20921	11.8169	7.71355	7.04368	5.93108	6.43178	7.30877	3.55371
ENSMUSG00000005950	P2rx5	11	+	73160421	73172685	purinergic receptor P2X, ligand-gated ion channel, 5 [Source:MGI Symbol;Acc:MGI:2137026]	protein_coding	0	0	0	0	0	0	0	0	0	0	0	0
ENSMUSG00000005951	Shpk	11	+	73199460	73224511	sedoheptulokinase [Source:MGI Symbol;Acc:MGI:1921887]	protein_coding	0.825979	0.416692	0.646462	0.261861	0.034038	0.181111	0.786862	0.669734	1.03837	0	0.538993	0.482244
ENSMUSG00000005952	Trpv1	11	+	73234292	73261242	transient receptor potential cation channel, subfamily V, member 1 [Source:MGI Symbol;Acc:MGI:1341787]	protein_coding	0	0	0	0.068237	0	0	0	0	0	0	0	0.441637
ENSMUSG00000005958	Ephb3	16	+	21204755	21223305	Eph receptor B3 [Source:MGI Symbol;Acc:MGI:104770]	protein_coding	0	0	0.0195	0	0	0.05432	0	0	0	0	0	0
ENSMUSG00000005968	Tuft1	3	-	94612757	94658872	tuftelin 1 [Source:MGI Symbol;Acc:MGI:109572]	protein_coding	0.211464	0.059519	0	0.59608	1.12225	2.33661	0	0	0.147349	0	0	0
ENSMUSG00000005973	Rcn1	2	-	105386291	105399319	reticulocalbin 1 [Source:MGI Symbol;Acc:MGI:104559]	protein_coding	9.52978	8.55607	8.75706	25.0514	10.908	7.73152	11.1604	7.36469	6.66197	5.17739	3.09888	6.47955
ENSMUSG00000005980	Dnase1	16	+	4036942	4040024	deoxyribonuclease I [Source:MGI Symbol;Acc:MGI:103157]	protein_coding	0.160284	0.112683	0.060645	0.025338	0.729209	0	0	0	0	1.39158	0	0.287396
ENSMUSG00000005981	Trap1	16	-	4039971	4077827	TNF receptor-associated protein 1 [Source:MGI Symbol;Acc:MGI:1915265]	protein_coding	17.0715	11.5587	17.2409	32.4221	26.6908	15.1076	16.3032	19.1699	20.2737	11.7501	8.65247	5.79227
ENSMUSG00000005982	Naa60	16	+	3872375	3904770	N(alpha)-acetyltransferase 60, NatF catalytic subunit [Source:MGI Symbol;Acc:MGI:1922013]	protein_coding	19.8035	19.1332	21.0819	29.2968	32.1128	12.2039	2.64107	8.3079	6.36716	6.81891	1.50875	3.13755
ENSMUSG00000005983	1700037C18Rik	16	-	3895179	3908689	RIKEN cDNA 1700037C18 gene [Source:MGI Symbol;Acc:MGI:1920511]	protein_coding	3.42063	3.47461	3.30006	1.15486	1.9475	4.53419	8.47429	3.19271	5.35922	2.33916	4.21221	1.44111
ENSMUSG00000005986	Ankrd13d	19	-	4270180	4283137	ankyrin repeat domain 13 family, member D [Source:MGI Symbol;Acc:MGI:1915673]	protein_coding	2.48643	1.45355	2.33737	1.13472	3.78986	1.09578	4.87313	3.86984	5.10962	1.4934	4.56311	2.54918
ENSMUSG00000005994	Tyrp1	4	+	80834123	80851719	tyrosinase-related protein 1 [Source:MGI Symbol;Acc:MGI:98881]	protein_coding	0	0	0	0	0	0	0	0.079624	0	0.330106	0	0
ENSMUSG00000006005	Tpr	1	+	150392838	150449935	translocated promoter region, nuclear basket protein [Source:MGI Symbol;Acc:MGI:1922066]	protein_coding	51.5971	42.6442	44.808	46.9681	28.8039	36.6122	74.7405	64.5471	72.7788	48.152	45.6109	40.6303
ENSMUSG00000006007	Pdc	1	+	150319417	150333906	phosducin [Source:MGI Symbol;Acc:MGI:98090]	protein_coding	0	0	0	0	0	0	1.08834	1.37779	0.795152	5.97936	1.26805	3.15299
ENSMUSG00000006010	Odr4	1	-	150361305	150393080	odr4 GPCR localization factor homolog [Source:MGI Symbol;Acc:MGI:2385108]	protein_coding	10.0032	10.1681	10.2507	9.26308	11.7039	5.14742	11.9608	10.0526	14.3838	14.5803	17.9105	13.9504
ENSMUSG00000006014	Prg4	1	-	150449412	150466165	proteoglycan 4 (megakaryocyte stimulating factor, articular superficial zone protein) [Source:MGI Symbol;Acc:MGI:1891344]	protein_coding	0.438201	0.34619	0.273012	0	0.130467	0.230514	0.293016	0.615982	0.407575	0.370179	0.278635	0.367397
ENSMUSG00000006019	Dhx34	7	-	16197147	16222037	DEAH (Asp-Glu-Ala-His) box polypeptide 34 [Source:MGI Symbol;Acc:MGI:1918973]	protein_coding	2.74367	1.6935	2.23883	0.95253	0.738351	1.16067	3.47082	2.44575	2.45124	1.91743	3.11502	2.77058
ENSMUSG00000006021	Kptn	7	+	16119895	16127516	kaptin [Source:MGI Symbol;Acc:MGI:1890380]	protein_coding	9.13632	7.70248	11.33	12.4486	7.83057	8.17535	7.21646	9.74615	10.4841	6.46446	4.32465	7.03788
ENSMUSG00000006024	Napa	7	+	16098458	16117975	N-ethylmaleimide sensitive fusion protein attachment protein alpha [Source:MGI Symbol;Acc:MGI:104563]	protein_coding	72.6192	65.0546	54.6501	56.9724	75.9458	67.7579	26.5921	24.8028	24.154	8.4871	22.3868	12.9821
ENSMUSG00000006050	Sra1	18	-	36666681	36670815	steroid receptor RNA activator 1 [Source:MGI Symbol;Acc:MGI:1344414]	protein_coding	74.4767	69.2565	53.7389	82.9607	78.8079	80.8384	24.8133	30.3047	26.9156	22.1911	10.8839	15.7467
ENSMUSG00000006056	Calcoco2	11	-	96099326	96111964	calcium binding and coiled-coil domain 2 [Source:MGI Symbol;Acc:MGI:1343177]	protein_coding	0	0	0	0	0	0	0	0	0	0	0	0
ENSMUSG00000006057	Atp5g1	11	-	96068852	96075670	ATP synthase, H+ transporting, mitochondrial F0 complex, subunit C1 (subunit 9) [Source:MGI Symbol;Acc:MGI:107653]	protein_coding	51.0516	64.1478	63.765	125.842	169.07	131.871	32.1659	24.5185	35.1055	6.06171	5.6643	5.5093
ENSMUSG00000006058	Snf8	11	+	96034885	96047430	SNF8, ESCRT-II complex subunit, homolog (S. cerevisiae) [Source:MGI Symbol;Acc:MGI:1343161]	protein_coding	45.854	38.5671	48.7549	45.0284	41.6291	41.2081	72.6669	89.9454	78.3926	98.0655	82.9909	63.1129
ENSMUSG00000006095	Tbcb	7	-	30224131	30232272	tubulin folding cofactor B [Source:MGI Symbol;Acc:MGI:1913661]	protein_coding	60.031	67.571	73.2219	105.014	93.8168	78.3589	40.7609	62.1745	41.652	40.924	35.27	28.2133
ENSMUSG00000006127	Inpp5k	11	+	75630988	75648871	inositol polyphosphate 5-phosphatase K [Source:MGI Symbol;Acc:MGI:1194899]	protein_coding	23.6502	24.3011	21.4483	28.0424	18.5344	18.9648	10.6186	13.9024	17.3823	9.81719	12.5785	7.85563
ENSMUSG00000006134	Crkl	16	+	17451987	17487434	v-crk avian sarcoma virus CT10 oncogene homolog-like [Source:MGI Symbol;Acc:MGI:104686]	protein_coding	2.98639	3.53079	3.36361	6.02783	3.95414	5.50336	5.45539	4.90327	4.54258	2.74943	4.31784	4.55495
ENSMUSG00000006143	Upk3bl	5	+	136054492	136064326	uroplakin 3B-like [Source:MGI Symbol;Acc:MGI:1916915]	protein_coding	0.138373	0.124622	0.102341	0	0.191358	0	0	0	0.470062	0	0	0
ENSMUSG00000006154	Eps8l1	7	+	4460674	4480487	EPS8-like 1 [Source:MGI Symbol;Acc:MGI:1914675]	protein_coding	0	0	0.034739	0	0	0	0	0.053939	0	0	0	0
ENSMUSG00000006169	Clint1	11	+	45851964	45910625	clathrin interactor 1 [Source:MGI Symbol;Acc:MGI:2144243]	protein_coding	52.9324	46.8469	46.2872	54.51	35.2072	49.8063	38.6462	45.9248	49.9645	33.9075	35.2976	25.6897
ENSMUSG00000006179	Prss16	13	-	22002173	22009742	protease, serine 16 (thymus) [Source:MGI Symbol;Acc:MGI:1859181]	protein_coding	3.56988	3.88081	3.88335	4.80014	3.88339	7.74955	6.59321	4.79983	3.13296	2.47425	3.40348	1.35362
ENSMUSG00000006191	Cdkal1	13	-	29191746	29855674	CDK5 regulatory subunit associated protein 1-like 1 [Source:MGI Symbol;Acc:MGI:1921765]	protein_coding	5.08238	5.01092	4.04667	1.87893	3.92479	2.18634	7.04137	8.10045	6.39218	4.16476	3.73745	13.4247
ENSMUSG00000006200	Rhox6	X	+	37826910	37829857	reproductive homeobox 6 [Source:MGI Symbol;Acc:MGI:1202888]	protein_coding	0	0	0	0	0	0	0	0	0	0	0	0
ENSMUSG00000006204	Cdcp3	7	+	131174402	131306451	CUB domain containing protein 3 [Source:MGI Symbol;Acc:MGI:1918645]	protein_coding	0	0	0.005741	0.001302	0.003241	0.019855	0.032366	0.042753	0.137491	0.016867	0.055759	0.674923
ENSMUSG00000006205	Htra1	7	+	130936111	130985660	HtrA serine peptidase 1 [Source:MGI Symbol;Acc:MGI:1929076]	protein_coding	15.3985	15.7836	12.9217	12.2432	14.538	14.5669	3.96856	9.90966	3.74109	4.156	2.50019	6.05466
ENSMUSG00000006215	Zbtb17	4	+	141444654	141467930	zinc finger and BTB domain containing 17 [Source:MGI Symbol;Acc:MGI:107410]	protein_coding	4.98147	6.25068	8.2891	8.89417	5.3393	7.94926	7.45357	7.7148	5.79051	6.07426	4.39449	4.15817
ENSMUSG00000006216	Clcnkb	4	-	141404353	141416014	chloride channel, voltage-sensitive Kb [Source:MGI Symbol;Acc:MGI:1930643]	protein_coding	0	0	0	0	0	0	0	0	0	0	0	0.10579
ENSMUSG00000006218	Fam131c	4	+	141368220	141384175	family with sequence similarity 131, member C [Source:MGI Symbol;Acc:MGI:2685539]	protein_coding	0	0	0	0	0	0	0	0	0	0	0	0
ENSMUSG00000006219	Fblim1	4	-	141576062	141606096	filamin binding LIM protein 1 [Source:MGI Symbol;Acc:MGI:1921452]	protein_coding	1.64884	1.69796	0.80172	0	0.79939	0	0.560739	0.542433	1.29652	0.082793	0.547185	0
ENSMUSG00000006221	Hspb7	4	+	141420779	141425311	heat shock protein family, member 7 (cardiovascular) [Source:MGI Symbol;Acc:MGI:1352494]	protein_coding	0	0	1.02447	0	0	0	0	0	0	0	0	0
ENSMUSG00000006235	Epor	9	-	21958897	21963506	erythropoietin receptor [Source:MGI Symbol;Acc:MGI:95408]	protein_coding	0	0	0	0	0	0	0	0.099208	0	0	0	0
ENSMUSG00000006241	Ccdc159	9	+	21927471	21935872	coiled-coil domain containing 159 [Source:MGI Symbol;Acc:MGI:1914369]	protein_coding	0.789207	0.361326	0.455533	1.57724	0.047973	0	0.224546	0	0	0.816017	0	3.32857
ENSMUSG00000006262	Mob1b	5	+	88720855	88764220	MOB kinase activator 1B [Source:MGI Symbol;Acc:MGI:1915723]	protein_coding	4.17301	2.83953	3.30114	5.6047	4.50673	5.23302	3.90007	2.8446	2.09086	1.73015	3.93427	2.6282
ENSMUSG00000006269	Atp6v1b1	6	+	83742990	83758855	ATPase, H+ transporting, lysosomal V1 subunit B1 [Source:MGI Symbol;Acc:MGI:103285]	protein_coding	0.08141	0	0	0	0	0	0	0.133984	0	0	0	0.095065
ENSMUSG00000006270	Vax1	19	-	59166187	59170056	ventral anterior homeobox 1 [Source:MGI Symbol;Acc:MGI:1277163]	protein_coding	0	0	0	0	0	0	0	0	0	0	0	0
ENSMUSG00000006273	Atp6v1b2	8	+	69088646	69113711	ATPase, H+ transporting, lysosomal V1 subunit B2 [Source:MGI Symbol;Acc:MGI:109618]	protein_coding	262.08	217.237	198.144	185.51	217.367	202.726	74.073	88.2517	77.4335	55.7174	45.1933	41.3205
ENSMUSG00000006276	Eps15l1	8	-	72340999	72421460	epidermal growth factor receptor pathway substrate 15-like 1 [Source:MGI Symbol;Acc:MGI:104582]	protein_coding	14.8587	11.3682	13.3142	12.4752	10.2646	11.2554	9.6199	12.2334	10.6878	4.85207	5.69139	3.23342
ENSMUSG00000006281	Tep1	14	-	50824059	50870560	telomerase associated protein 1 [Source:MGI Symbol;Acc:MGI:109573]	protein_coding	6.70343	5.71702	5.95012	7.64497	9.94924	13.439	9.82144	7.66974	6.25002	6.10087	5.64259	3.81926
ENSMUSG00000006288	Ttc5	14	-	50765415	50785519	tetratricopeptide repeat domain 5 [Source:MGI Symbol;Acc:MGI:2683584]	protein_coding	37.0497	23.6366	23.2833	28.6134	19.5047	32.574	11.1678	8.53467	4.89846	7.06825	6.72848	14.4241
ENSMUSG00000006289	Osgep	14	-	50906478	50924893	O-sialoglycoprotein endopeptidase [Source:MGI Symbol;Acc:MGI:1913496]	protein_coding	14.5813	12.4391	11.1477	11.8011	6.7292	14.82	8.39824	12.9003	13.4468	6.01041	1.76329	9.24682
ENSMUSG00000006299	Aamp	1	-	74279840	74284738	angio-associated migratory protein [Source:MGI Symbol;Acc:MGI:107809]	protein_coding	87.0086	63.7849	76.5091	99.7509	78.439	89.383	38.3247	35.0857	31.6055	37.3035	32.0756	29.0173
ENSMUSG00000006301	Tmbim1	1	-	74288247	74305622	transmembrane BAX inhibitor motif containing 1 [Source:MGI Symbol;Acc:MGI:1916910]	protein_coding	6.9262	7.46915	5.64814	9.42877	8.39422	10.9957	6.50309	6.98677	5.60736	3.05981	3.19688	9.16838
ENSMUSG00000006304	Arpc2	1	+	74236084	74268209	actin related protein 2/3 complex, subunit 2 [Source:MGI Symbol;Acc:MGI:1923959]	protein_coding	739.138	766.09	675.681	716.283	670.617	625.247	440.392	524.958	475.251	386.185	352.703	311.603
ENSMUSG00000006307	Kmt2b	7	-	30568858	30588726	lysine (K)-specific methyltransferase 2B [Source:MGI Symbol;Acc:MGI:109565]	protein_coding	20.8299	18.4318	28.3381	20.3196	21.1378	20.1161	48.9837	46.0252	43.6628	21.5131	31.0253	21.3129
ENSMUSG00000006310	Zbtb32	7	-	30589681	30598909	zinc finger and BTB domain containing 32 [Source:MGI Symbol;Acc:MGI:1891838]	protein_coding	0.675325	0	0.057623	0	0.602935	0.865362	0	0.293243	0.674193	0	0	0
ENSMUSG00000006311	Etv2	7	-	30633616	30635852	ets variant 2 [Source:MGI Symbol;Acc:MGI:99253]	protein_coding	0	0	0	0	0	0	0	0	0	0	0	0
ENSMUSG00000006313	Upk1a	7	-	30603092	30612847	uroplakin 1A [Source:MGI Symbol;Acc:MGI:98911]	protein_coding	0.519551	1.43153	0.948631	4.00409	3.80898	5.06124	1.20041	0.664008	1.55365	1.40249	5.90455	1.13343
ENSMUSG00000006315	Tmem147	7	-	30727701	30729540	transmembrane protein 147 [Source:MGI Symbol;Acc:MGI:1915011]	protein_coding	77.1819	90.2517	74.5928	145.931	164.1	154.901	35.0329	41.6719	56.5276	48.7467	33.4038	24.4911
ENSMUSG00000006333	Rps9	7	+	3703993	3706897	ribosomal protein S9 [Source:MGI Symbol;Acc:MGI:1924096]	protein_coding	1444.51	2065	2162.69	2164.36	2008.03	2248.36	1723.95	2007.95	1740.69	2488.78	2362.08	2019.16
ENSMUSG00000006335	Tfpt	7	-	3620324	3629929	TCF3 (E2A) fusion partner [Source:MGI Symbol;Acc:MGI:1916964]	protein_coding	12.6201	16.0109	10.6821	15.3383	12.7755	14.7746	9.07562	13.8385	11.5196	9.19508	6.36472	6.09559
ENSMUSG00000006342	Susd2	10	-	75636706	75644008	sushi domain containing 2 [Source:MGI Symbol;Acc:MGI:1918983]	protein_coding	0	0.219172	0.055088	0	0	0	0	0	0	0	1.10894	0
ENSMUSG00000006344	Ggt5	10	+	75589340	75617200	gamma-glutamyltransferase 5 [Source:MGI Symbol;Acc:MGI:1346063]	protein_coding	4.03332	4.58219	5.62883	0.155432	0.265929	0.456326	1.99524	2.7198	1.64437	2.51174	3.01186	1.43104
ENSMUSG00000006345	Ggt1	10	+	75561604	75586200	gamma-glutamyltransferase 1 [Source:MGI Symbol;Acc:MGI:95706]	protein_coding	1.46616	0.731123	0.237609	0	0.053669	1.67305	0	0.152914	0	0	0.410914	0.470601
ENSMUSG00000006356	Crip2	12	+	113140236	113145506	cysteine rich protein 2 [Source:MGI Symbol;Acc:MGI:1915587]	protein_coding	0.346639	0.417204	1.46437	5.73206	5.8264	5.44785	1.36684	3.21269	1.42482	0	0	0
ENSMUSG00000006360	Crip1	12	+	113146316	113153879	cysteine-rich protein 1 (intestinal) [Source:MGI Symbol;Acc:MGI:88501]	protein_coding	7.57436	13.3216	16.2894	99.1891	112.652	114.35	167.25	201.179	195.8	183.307	168.729	125.131
ENSMUSG00000006362	Cbfa2t3	8	-	122625141	122699109	CBFA2/RUNX1 translocation partner 3 [Source:MGI Symbol;Acc:MGI:1338013]	protein_coding	0.176045	0.138898	0.098759	0.924098	0.697764	0.424364	2.20114	2.86877	4.43159	2.9185	3.73281	2.77321
ENSMUSG00000006369	Fbln1	15	+	85205949	85286535	fibulin 1 [Source:MGI Symbol;Acc:MGI:95487]	protein_coding	0.319884	0.545521	0.911311	0.48582	0.079823	2.98596	0.322792	0.59146	0.239419	0	0	0
ENSMUSG00000006373	Pgrmc1	X	+	36598206	36606079	progesterone receptor membrane component 1 [Source:MGI Symbol;Acc:MGI:1858305]	protein_coding	18.3975	17.3065	15.1186	23.231	20.4471	23.8574	11.3022	13.5544	13.1149	8.56195	9.13445	14.3562
ENSMUSG00000006378	Gcat	15	+	79030874	79038353	glycine C-acetyltransferase (2-amino-3-ketobutyrate-coenzyme A ligase) [Source:MGI Symbol;Acc:MGI:1349389]	protein_coding	4.83166	5.68636	4.85957	8.14909	14.7087	25.716	4.72801	5.61822	6.43358	6.1329	12.4691	9.88721
ENSMUSG00000006386	Tek	4	+	94739289	94874976	TEK receptor tyrosine kinase [Source:MGI Symbol;Acc:MGI:98664]	protein_coding	0	0	0	0	0	0	0	0	0	0	0	0
ENSMUSG00000006389	Mpl	4	-	118442415	118457513	myeloproliferative leukemia virus oncogene [Source:MGI Symbol;Acc:MGI:97076]	protein_coding	0	0	0	0	0.054475	0	0.093872	0.268429	0.090259	0	0	0
ENSMUSG00000006390	Elovl1	4	+	118428093	118432953	elongation of very long chain fatty acids (FEN1/Elo2, SUR4/Elo3, yeast)-like 1 [Source:MGI Symbol;Acc:MGI:1858959]	protein_coding	91.7282	86.5261	67.9331	53.9049	101.863	77.5601	30.5946	37.6115	27.6593	13.0337	20.6587	17.4466
ENSMUSG00000006392	Med8	4	+	118409337	118415782	mediator complex subunit 8 [Source:MGI Symbol;Acc:MGI:1915269]	protein_coding	69.2096	72.6888	54.5263	101.339	79.1699	67.9779	27.0212	32.5745	23.9913	27.5864	30.2048	19.3363
ENSMUSG00000006395	Hyi	4	+	118359990	118362744	hydroxypyruvate isomerase (putative) [Source:MGI Symbol;Acc:MGI:1915430]	polymorphic_pseudogene	2.77137	3.82817	5.72363	11.4033	5.10778	8.34615	5.94422	5.86627	6.01195	5.55457	7.36526	5.59892
ENSMUSG00000006398	Cdc20	4	-	118432901	118437352	cell division cycle 20 [Source:MGI Symbol;Acc:MGI:1859866]	protein_coding	29.504	29.3223	26.6221	59.8032	39.0708	53.5273	21.5075	22.2347	16.772	24.277	24.9421	18.5954
ENSMUSG00000006403	Adamts4	1	+	171250421	171260637	a disintegrin-like and metallopeptidase (reprolysin type) with thrombospondin type 1 motif, 4 [Source:MGI Symbol;Acc:MGI:1339949]	protein_coding	0	0	0.026889	0	0	0	0.140956	0.291796	0.60337	0	0	4.15705
ENSMUSG00000006411	Nectin4	1	+	171370099	171388598	nectin cell adhesion molecule 4 [Source:MGI Symbol;Acc:MGI:1918990]	protein_coding	0.11804	0.184517	0.272724	0	0	0	0	0.473738	0.399703	0	0.267644	0.263912
ENSMUSG00000006412	Pfdn2	1	+	171345670	171359254	prefoldin 2 [Source:MGI Symbol;Acc:MGI:1276111]	protein_coding	27.3085	20.6377	20.7583	26.8232	18.8648	25.2661	28.7541	25.8498	22.0536	31.4986	28.2161	17.4435
ENSMUSG00000006418	Rnf114	2	+	167492645	167516173	ring finger protein 114 [Source:MGI Symbol;Acc:MGI:1933159]	protein_coding	26.8022	21.6376	22.5566	22.9533	20.6615	20.9074	10.1445	11.5324	6.85663	4.00771	6.25517	5.16408
ENSMUSG00000006423	C330007P06Rik	X	-	36823737	36874111	RIKEN cDNA C330007P06 gene [Source:MGI Symbol;Acc:MGI:1924894]	protein_coding	7.82221	7.64517	5.60521	10.206	6.70516	9.38752	4.47509	4.31496	3.51843	2.71523	1.75873	8.61408
ENSMUSG00000006435	Neurl1a	19	+	47178820	47259441	neuralized E3 ubiquitin protein ligase 1A [Source:MGI Symbol;Acc:MGI:1334263]	protein_coding	0	0	0.013666	0	0	0	0	0.207246	0.270296	0.298498	0	0
ENSMUSG00000006442	Srm	4	+	148591503	148594993	spermidine synthase [Source:MGI Symbol;Acc:MGI:102690]	protein_coding	44.6127	42.914	41.9967	139.863	150.588	137.884	32.3826	48.3464	30.8278	23.9718	14.6855	12.6969
ENSMUSG00000006445	Epha2	4	+	141301240	141329384	Eph receptor A2 [Source:MGI Symbol;Acc:MGI:95278]	protein_coding	0	0	0.033213	0	0	0	0	0	0	0	0	0
ENSMUSG00000006456	Rbm14	19	-	4800569	4811634	RNA binding motif protein 14 [Source:MGI Symbol;Acc:MGI:1929092]	protein_coding	4.72532	5.55617	3.98275	9.66826	12.0489	12.9255	8.95896	5.50886	7.53703	9.74208	9.4978	9.051
ENSMUSG00000006457	Actn3	19	-	4861216	4877909	actinin alpha 3 [Source:MGI Symbol;Acc:MGI:99678]	protein_coding	0	0	0.192078	0	0	0.044816	0	0.052262	0	0	0	0
ENSMUSG00000006462	A530013C23Rik	2	+	167691177	167729172	RIKEN cDNA A530013C23 gene [Source:MGI Symbol;Acc:MGI:3041178]	lincRNA	0.234575	0.73892	0.33483	0.219085	0.302154	0.566962	0.584014	0.424395	0.155649	0.103264	0	0
ENSMUSG00000006463	Zdhhc24	19	+	4878668	4885397	zinc finger, DHHC domain containing 24 [Source:MGI Symbol;Acc:MGI:1917855]	protein_coding	6.42937	5.58228	5.10668	7.20556	7.90269	8.45703	3.84414	2.64499	2.80623	1.13221	1.40319	0.803221
ENSMUSG00000006464	Bbs1	19	-	4886878	4906628	Bardet-Biedl syndrome 1 (human) [Source:MGI Symbol;Acc:MGI:1277215]	protein_coding	0.048501	0.063352	0.095399	0.433384	0.651091	0.027235	0.100966	0.387844	0.541782	0	0	0.038289
ENSMUSG00000006469	Slc34a3	2	-	25228898	25234364	solute carrier family 34 (sodium phosphate), member 3 [Source:MGI Symbol;Acc:MGI:2159410]	protein_coding	0	0	0	0	0	0	0	0	0	0.487332	0	0
ENSMUSG00000006471	Ndor1	2	-	25244821	25256022	NADPH dependent diflavin oxidoreductase 1 [Source:MGI Symbol;Acc:MGI:1926047]	protein_coding	4.22227	2.19032	2.26541	3.61323	7.63892	1.07963	1.55375	2.4799	2.9441	0.678368	1.28593	0.413259
ENSMUSG00000006476	Nsmf	2	+	25054355	25062881	NMDA receptor synaptonuclear signaling and neuronal migration factor [Source:MGI Symbol;Acc:MGI:1861755]	protein_coding	1.28415	1.00632	1.04141	2.53133	0.503421	2.17421	1.53185	4.08263	1.78791	2.52502	1.6769	1.17334
ENSMUSG00000006488	Prl7a1	13	-	27633366	27642493	prolactin family 7, subfamily a, member 1 [Source:MGI Symbol;Acc:MGI:1206572]	protein_coding	0.086499	0	0	0	0	0	0.841425	3.56798	2.59656	4.81149	8.03623	14.8485
ENSMUSG00000006490	Prl8a9	13	-	27557995	27564606	prolactin family8, subfamily a, member 9 [Source:MGI Symbol;Acc:MGI:1914560]	protein_coding	0	0	0	0	0	0	0	0	0	0.218341	0	0
ENSMUSG00000006494	Pdk1	2	+	71873224	71903858	pyruvate dehydrogenase kinase, isoenzyme 1 [Source:MGI Symbol;Acc:MGI:1926119]	protein_coding	3.34577	2.91499	3.63939	1.28944	2.7511	3.76858	2.88317	2.55396	3.46273	3.74257	2.10093	4.75368
ENSMUSG00000006498	Ptbp1	10	+	79854427	79864771	polypyrimidine tract binding protein 1 [Source:MGI Symbol;Acc:MGI:97791]	protein_coding	16.3508	12.5402	11.1181	29.1671	31.2323	22.7316	19.7479	20.773	14.777	15.743	10.6902	12.0871
ENSMUSG00000006517	Mvd	8	-	122433601	122443422	mevalonate (diphospho) decarboxylase [Source:MGI Symbol;Acc:MGI:2179327]	protein_coding	17.8271	12.6385	13.8187	27.2037	22.5823	18.7601	13.2599	22.8562	17.3517	13.9378	10.2542	11.86
ENSMUSG00000006519	Cyba	8	-	122424776	122432930	cytochrome b-245, alpha polypeptide [Source:MGI Symbol;Acc:MGI:1316658]	protein_coding	1297.5	1662.6	1518.59	1630.6	1564.28	1631.82	674.951	777.601	690.578	451.904	556.493	360.482
ENSMUSG00000006522	Itih3	14	-	30908572	30923760	inter-alpha trypsin inhibitor, heavy chain 3 [Source:MGI Symbol;Acc:MGI:96620]	protein_coding	0	0.340495	0.14208	0	0	0	0	0.837371	1.0592	0	0.682361	1.0365
ENSMUSG00000006526	Stimate	14	+	30825590	30877210	STIM activating enhancer [Source:MGI Symbol;Acc:MGI:1921500]	protein_coding	6.2143	5.96905	6.90401	4.65222	4.83823	12.2096	5.87044	3.00457	3.53201	1.97667	5.18823	1.16919
ENSMUSG00000006527	Sfmbt1	14	+	30714849	30822721	Scm-like with four mbt domains 1 [Source:MGI Symbol;Acc:MGI:1859609]	protein_coding	1.15979	0.722273	0.393282	0.599097	1.53117	0.694935	1.56907	1.17252	1.78944	1.31204	2.94536	3.77304
ENSMUSG00000006529	Itih1	14	-	30929180	30943289	inter-alpha trypsin inhibitor, heavy chain 1 [Source:MGI Symbol;Acc:MGI:96618]	protein_coding	0	0.222186	0.205926	0	0	0	0	0	0	0	0	0
ENSMUSG00000006538	Ihh	1	-	74945315	74951672	Indian hedgehog [Source:MGI Symbol;Acc:MGI:96533]	protein_coding	0	0	0	0	0	0.275296	0	0	0	0	0	0
ENSMUSG00000006542	Prkag3	1	-	74738922	74749221	protein kinase, AMP-activated, gamma 3 non-catalytic subunit [Source:MGI Symbol;Acc:MGI:1891343]	protein_coding	0	0	0	0.019917	0.023967	0	0	0	0	0	0	0
ENSMUSG00000006546	Cryba2	1	-	74889934	74893143	crystallin, beta A2 [Source:MGI Symbol;Acc:MGI:104336]	protein_coding	0	0	0	0	0	0	0	0.109501	0	0	0	0
ENSMUSG00000006567	Atp7b	8	-	21992785	22060305	ATPase, Cu++ transporting, beta polypeptide [Source:MGI Symbol;Acc:MGI:103297]	protein_coding	0.288081	0.132048	0.177078	0.375015	0.174349	0.409199	0.796846	0.239162	0.143535	0.154384	0	0
ENSMUSG00000006570	Defb2	8	+	21839926	21843482	defensin beta 2 [Source:MGI Symbol;Acc:MGI:1338754]	protein_coding	0.381235	0	0	0	0	0	2.89575	1.13851	0	3.21363	0	0
ENSMUSG00000006574	Slc4a1	11	-	102348824	102366203	solute carrier family 4 (anion exchanger), member 1 [Source:MGI Symbol;Acc:MGI:109393]	protein_coding	0.108033	0.139676	0.168619	0	0.025195	0.115319	0	0	0.095909	0	0	0
ENSMUSG00000006575	Rundc3a	11	+	102393403	102402555	RUN domain containing 3A [Source:MGI Symbol;Acc:MGI:1858752]	protein_coding	0	0.238241	0.284988	0	0.995531	0	0.171053	2.39919	1.22572	0	0	0
ENSMUSG00000006576	Slc4a3	1	+	75546266	75562172	solute carrier family 4 (anion exchanger), member 3 [Source:MGI Symbol;Acc:MGI:109350]	protein_coding	0	0	0.018826	0.083938	0	0	0	0.139922	0.402916	0.669533	0	0
ENSMUSG00000006585	Cdt1	8	+	122568015	122573554	chromatin licensing and DNA replication factor 1 [Source:MGI Symbol;Acc:MGI:1914427]	protein_coding	5.72059	5.62512	7.85703	18.1493	17.3799	21.5233	19.3789	17.0771	16.5462	24.9825	27.1813	19.12
ENSMUSG00000006586	Runx1t1	4	+	13743436	13893649	RUNX1 translocation partner 1 [Source:MGI Symbol;Acc:MGI:104793]	protein_coding	0	0.030167	0.025647	0.093748	0	0.026416	0.333682	0.225942	0.264193	0.722353	1.32499	2.84115
ENSMUSG00000006587	Snai3	8	-	122454208	122460733	snail family zinc finger 3 [Source:MGI Symbol;Acc:MGI:1353563]	protein_coding	1.81288	2.12998	1.46003	5.47197	7.84225	5.79058	0	0	0	0	0	0.145624
ENSMUSG00000006589	Aprt	8	-	122574635	122576909	adenine phosphoribosyl transferase [Source:MGI Symbol;Acc:MGI:88061]	protein_coding	547.71	725.748	772.014	737.186	748.853	824.91	456.508	499.681	417.806	237.129	303.753	143.183
ENSMUSG00000006599	Gtf2h1	7	+	46796103	46823800	general transcription factor II H, polypeptide 1 [Source:MGI Symbol;Acc:MGI:1277216]	protein_coding	10.7503	13.5391	12.6775	15.83	14.0451	18.9786	19.7505	21.5044	13.9444	17.9475	11.783	14.7071
ENSMUSG00000006611	Hfe	13	-	23702034	23710854	homeostatic iron regulator [Source:MGI Symbol;Acc:MGI:109191]	protein_coding	1.13154	1.33063	1.61827	0.161277	0.544874	1.13064	1.31738	0.513754	0.501384	0.149312	0	0
ENSMUSG00000006638	Abhd1	5	+	30950066	30955091	abhydrolase domain containing 1 [Source:MGI Symbol;Acc:MGI:1931013]	polymorphic_pseudogene	2.61164	2.62197	2.46544	1.82545	1.00744	2.07623	0.449234	0.732977	0.901964	1.12087	4.21328	0
ENSMUSG00000006641	Slc5a6	5	-	31036036	31048924	solute carrier family 5 (sodium-dependent vitamin transporter), member 6 [Source:MGI Symbol;Acc:MGI:2660847]	protein_coding	2.15232	0.907002	1.01409	0.632069	1.04137	6.6286	1.37104	1.17281	1.42411	1.89321	0	0.48955
ENSMUSG00000006642	Tcf23	5	+	30968662	30977018	transcription factor 23 [Source:MGI Symbol;Acc:MGI:1934960]	protein_coding	0	0	0	0	0	0	0	0	0	0	0	0
ENSMUSG00000006649	Nphs1	7	+	30458315	30487223	nephrosis 1, nephrin [Source:MGI Symbol;Acc:MGI:1859637]	protein_coding	0.393925	0.569086	0.71529	0.538479	0.675676	0.538913	0.348745	0.399269	0.316259	0.092348	0.243927	0
ENSMUSG00000006651	Aplp1	7	-	30434982	30445535	amyloid beta (A4) precursor-like protein 1 [Source:MGI Symbol;Acc:MGI:88046]	protein_coding	0	0	0	0	0	0	0	1.95379	3.39807	0	0	0
ENSMUSG00000006673	Qrich1	9	+	108516806	108560163	glutamine-rich 1 [Source:MGI Symbol;Acc:MGI:1916482]	protein_coding	21.6563	15.8052	14.1875	17.7004	22.2903	19.97	15.9913	15.121	17.6578	10.302	16.1226	7.92661
ENSMUSG00000006675	P4htm	9	-	108578862	108597667	prolyl 4-hydroxylase, transmembrane (endoplasmic reticulum) [Source:MGI Symbol;Acc:MGI:1921693]	protein_coding	0.06284	0	0.12995	0	0	0	0.196462	0.408999	0	0	0	1.05865
ENSMUSG00000006676	Usp19	9	+	108490602	108502337	ubiquitin specific peptidase 19 [Source:MGI Symbol;Acc:MGI:1918722]	protein_coding	7.89213	6.37197	8.60096	18.3814	10.7012	12.4206	7.63195	9.30004	7.41684	14.9905	15.4217	6.09262
ENSMUSG00000006678	Pola1	X	-	93304767	93632155	polymerase (DNA directed), alpha 1 [Source:MGI Symbol;Acc:MGI:99660]	protein_coding	1.85651	1.43096	1.26286	1.37848	1.72396	2.1815	9.27248	9.29925	7.70481	11.0723	8.66529	10.025
ENSMUSG00000006699	Cdc42	4	-	137319696	137357720	cell division cycle 42 [Source:MGI Symbol;Acc:MGI:106211]	protein_coding	354.252	341.853	304.562	305.354	265.15	292.999	149.241	142.419	133.421	77.8667	76.3227	68.8604
ENSMUSG00000006705	Pknox1	17	+	31564734	31607693	Pbx/knotted 1 homeobox [Source:MGI Symbol;Acc:MGI:1201409]	protein_coding	7.86803	6.4488	6.20478	4.76952	8.28075	7.05727	9.49635	9.83033	8.3366	7.54651	4.98475	9.64264
ENSMUSG00000006711	D130043K22Rik	13	+	24845135	24901270	RIKEN cDNA D130043K22 gene [Source:MGI Symbol;Acc:MGI:3036268]	protein_coding	0	0	0.013419	0.062988	0.012724	0	0.127728	0	0.121325	0	0.233384	0.855829
ENSMUSG00000006715	Gmnn	13	-	24751845	24761923	geminin [Source:MGI Symbol;Acc:MGI:1927344]	protein_coding	37.5327	46.267	45.9382	46.8681	49.9774	80.0351	54.4421	49.4844	47.0453	48.0888	32.9856	13.1224
ENSMUSG00000006717	Acot13	13	-	24817948	24831540	acyl-CoA thioesterase 13 [Source:MGI Symbol;Acc:MGI:1914084]	protein_coding	40.3793	54.4462	54.6899	44.7198	41.741	49.5291	23.3681	27.0887	36.3678	16.7343	6.97042	11.1327
ENSMUSG00000006720	Zfp184	13	+	21945094	21960779	zinc finger protein 184 (Kruppel-like) [Source:MGI Symbol;Acc:MGI:1922244]	protein_coding	0	0.091932	0	0	0	0	0	0	0.252123	0.175681	0	4.31762
ENSMUSG00000006724	Cyp27b1	10	+	127048250	127053006	cytochrome P450, family 27, subfamily b, polypeptide 1 [Source:MGI Symbol;Acc:MGI:1098274]	protein_coding	0.184358	0	0	0	0	0	0	0	0	0	0	0
ENSMUSG00000006728	Cdk4	10	+	127063534	127067920	cyclin-dependent kinase 4 [Source:MGI Symbol;Acc:MGI:88357]	protein_coding	48.3412	47.383	43.9327	83.1353	91.3088	79.1606	52.092	55.785	55.4753	55.041	42.8406	36.4213
ENSMUSG00000006731	B4galnt1	10	+	127165225	127172330	beta-1,4-N-acetyl-galactosaminyl transferase 1 [Source:MGI Symbol;Acc:MGI:1342057]	protein_coding	108.973	89.5443	82.1698	159.043	149.255	140.422	30.6933	44.4701	40.2518	14.9426	32.4837	4.50376
ENSMUSG00000006732	Mettl1	10	+	127041414	127046365	methyltransferase like 1 [Source:MGI Symbol;Acc:MGI:1339986]	protein_coding	7.96708	8.46782	8.18736	13.5929	16.7165	19.7766	13.191	14.6437	19.0795	16.0254	11.9167	28.0734
ENSMUSG00000006736	Tspan31	10	-	127067280	127070264	tetraspanin 31 [Source:MGI Symbol;Acc:MGI:1914375]	protein_coding	53.5574	49.3874	47.0769	72.2881	40.5091	49.1491	4.10396	1.96954	4.77443	1.09138	1.73556	12.5805
ENSMUSG00000006740	Kif5b	18	-	6201002	6242174	kinesin family member 5B [Source:MGI Symbol;Acc:MGI:1098268]	protein_coding	63.6685	51.6706	49.8277	66.5392	49.3176	46.759	46.2219	43.6714	53.1863	42.1876	34.4104	46.3447
ENSMUSG00000006763	Saal1	7	-	46686108	46710680	serum amyloid A-like 1 [Source:MGI Symbol;Acc:MGI:1926185]	protein_coding	1.59274	2.37764	1.57885	3.94464	3.42422	2.98026	2.88669	2.53415	2.52768	4.47294	2.27198	4.53345
ENSMUSG00000006764	Tph2	10	-	115078641	115185022	tryptophan hydroxylase 2 [Source:MGI Symbol;Acc:MGI:2651811]	protein_coding	0.516887	0	0.181652	0	0.020344	0	0	0	0	0	0	0
ENSMUSG00000006777	Krt23	11	-	99477974	99493137	keratin 23 [Source:MGI Symbol;Acc:MGI:2148866]	protein_coding	0	0	0	0	0	0	0	0	0	0	0	0
ENSMUSG00000006782	Cnp	11	+	100574904	100591729	2',3'-cyclic nucleotide 3' phosphodiesterase [Source:MGI Symbol;Acc:MGI:88437]	protein_coding	3.56799	4.17191	3.6843	6.31623	5.31214	1.56353	3.63822	3.77519	3.78078	2.26788	2.13169	1.71373
ENSMUSG00000006784	Ttc25	11	+	100545607	100572568	tetratricopeptide repeat domain 25 [Source:MGI Symbol;Acc:MGI:1921657]	protein_coding	1.75171	1.34988	1.29041	1.6341	0.399905	1.07649	1.48626	2.25985	1.53511	0.993745	1.92353	1.40779
ENSMUSG00000006800	Sulf2	2	-	166073089	166155663	sulfatase 2 [Source:MGI Symbol;Acc:MGI:1919293]	protein_coding	16.3985	12.1492	10.921	2.20193	4.75629	3.19657	13.9653	12.4401	11.4998	12.0353	5.7444	9.82909
ENSMUSG00000006818	Sod2	17	+	13006846	13040063	superoxide dismutase 2, mitochondrial [Source:MGI Symbol;Acc:MGI:98352]	protein_coding	18.6579	24.9978	21.8466	27.7335	23.8613	26.8094	13.2186	14.6964	16.9548	10.9526	6.76876	6.30033
ENSMUSG00000006850	Tmco6	18	+	36735039	36742397	transmembrane and coiled-coil domains 6 [Source:MGI Symbol;Acc:MGI:1919233]	protein_coding	13.3621	11.5337	9.15487	6.66842	9.13187	11.9426	4.63039	8.1054	4.67867	4.98234	5.44456	6.42213
ENSMUSG00000006906	Stambp	6	-	83543211	83572729	STAM binding protein [Source:MGI Symbol;Acc:MGI:1917777]	protein_coding	21.6827	18.1109	17.2915	16.6775	12.4432	11.8639	6.24787	7.43881	9.42509	4.90691	3.46285	5.00724
ENSMUSG00000006920	Ezh1	11	-	101191115	101226463	enhancer of zeste 1 polycomb repressive complex 2 subunit [Source:MGI Symbol;Acc:MGI:1097695]	protein_coding	7.1745	4.05062	5.30677	4.69968	3.12781	3.78922	3.30782	4.71387	3.26112	1.56344	3.80861	1.326
ENSMUSG00000006930	Hap1	11	-	100347327	100356128	huntingtin-associated protein 1 [Source:MGI Symbol;Acc:MGI:1261831]	protein_coding	0	0	0	0	0	0	0.041967	0.656172	1.58862	0	0	0
ENSMUSG00000006931	P3h4	11	-	100408456	100414836	prolyl 3-hydroxylase family member 4 (non-enzymatic) [Source:MGI Symbol;Acc:MGI:1913430]	protein_coding	0	0	0.038131	0	0	0	0	0.177663	0	0	0.312642	0
ENSMUSG00000006932	Ctnnb1	9	+	120929216	120960507	catenin (cadherin associated protein), beta 1 [Source:MGI Symbol;Acc:MGI:88276]	protein_coding	52.2965	46.6862	44.4898	37.3453	33.1529	37.0336	61.0985	24.6476	24.7386	64.9338	45.9626	24.6799
ENSMUSG00000006941	Eif1b	9	+	120492232	120495330	eukaryotic translation initiation factor 1B [Source:MGI Symbol;Acc:MGI:1916219]	protein_coding	58.4669	64.0722	70.9384	81.258	75.548	84.7766	35.847	41.426	27.5513	23.234	19.584	10.722
ENSMUSG00000006948	Klk4	7	+	43881160	43885804	kallikrein related-peptidase 4 (prostase, enamel matrix, prostate) [Source:MGI Symbol;Acc:MGI:1861379]	protein_coding	0	0	0	0	0	0	0	0	0	0	1.72384	0
ENSMUSG00000006958	Chrd	16	+	20733127	20742384	chordin [Source:MGI Symbol;Acc:MGI:1313268]	protein_coding	0	0	0	0	0	0	0	0	0	0	0.070078	0
ENSMUSG00000006998	Psmd2	16	+	20651652	20663414	proteasome (prosome, macropain) 26S subunit, non-ATPase, 2 [Source:MGI Symbol;Acc:MGI:1096584]	protein_coding	66.8703	38.9063	37.8184	85.5642	60.3784	66.3446	43.065	42.4153	36.2874	54.0376	53.6554	37.9448
ENSMUSG00000007021	Syngr3	17	-	24685092	24689955	synaptogyrin 3 [Source:MGI Symbol;Acc:MGI:1341881]	protein_coding	0	0	0	0	0	0.308684	0	0.612809	0.794715	0	0	0
ENSMUSG00000007029	Vars	17	+	35000987	35016322	valyl-tRNA synthetase [Source:MGI Symbol;Acc:MGI:90675]	protein_coding	9.73511	9.4826	10.1517	12.0741	18.1197	16.2453	18.0281	18.8368	16.457	19.2655	16.9014	14.5088
ENSMUSG00000007030	Vwa7	17	+	35016579	35026741	von Willebrand factor A domain containing 7 [Source:MGI Symbol;Acc:MGI:1306798]	protein_coding	0	0.008213	0.106073	0	0	0	0.085297	0	0	0.073482	0	0
ENSMUSG00000007033	Hspa1l	17	+	34972703	34979285	heat shock protein 1-like [Source:MGI Symbol;Acc:MGI:96231]	protein_coding	0	0	0	0	0	0	0	0	0	0	0	0
ENSMUSG00000007034	Slc44a4	17	+	34914466	34930436	solute carrier family 44, member 4 [Source:MGI Symbol;Acc:MGI:1917379]	protein_coding	2.65342	2.92179	2.10963	9.8766	7.09837	6.58425	2.14561	1.66433	0.58683	0.657925	1.29313	0.920136
ENSMUSG00000007035	Msh5	17	-	35028605	35046745	mutS homolog 5 [Source:MGI Symbol;Acc:MGI:1329021]	protein_coding	0.544788	0.253338	0.259401	0	0.037312	0	0.380953	1.63364	0.503543	0	0	0.412349
ENSMUSG00000007036	Abhd16a	17	+	35089263	35102987	abhydrolase domain containing 16A [Source:MGI Symbol;Acc:MGI:99476]	protein_coding	16.8572	17.1274	14.4091	24.1744	23.6338	18.1182	7.93826	9.64372	8.97165	9.27069	3.94104	3.91786
ENSMUSG00000007038	Neu1	17	+	34931253	34935953	neuraminidase 1 [Source:MGI Symbol;Acc:MGI:97305]	protein_coding	30.5697	30.3789	30.0501	47.5421	45.4655	44.8284	25.9112	31.3324	20.4818	19.4101	14.382	15.2436
ENSMUSG00000007039	Ddah2	17	+	35059035	35062095	dimethylarginine dimethylaminohydrolase 2 [Source:MGI Symbol;Acc:MGI:1859016]	protein_coding	17.2391	18.8277	22.8881	10.3139	7.70452	11.8207	30.3065	23.8305	18.7627	28.4774	14.9479	11.5767
ENSMUSG00000007041	Clic1	17	+	35049966	35058749	chloride intracellular channel 1 [Source:MGI Symbol;Acc:MGI:2148924]	protein_coding	420.904	331.323	363.603	252.525	165.412	118.015	148.892	157.905	137.971	82.4417	72.6128	52.761
ENSMUSG00000007050	Lsm2	17	+	34981862	34985891	LSM2 homolog, U6 small nuclear RNA and mRNA degradation associated [Source:MGI Symbol;Acc:MGI:90676]	protein_coding	40.8913	58.6482	51.9595	80.2577	93.3722	87.2404	34.551	40.9542	37.1338	24.4722	38.2862	28.8613
ENSMUSG00000007080	Pole	5	+	110286306	110337474	polymerase (DNA directed), epsilon [Source:MGI Symbol;Acc:MGI:1196391]	protein_coding	1.17331	1.63129	2.73653	3.90014	2.38115	2.94092	2.28409	6.16774	6.52893	2.20832	3.00339	2.3822
ENSMUSG00000007097	Atp1a2	1	-	172271709	172298064	ATPase, Na+/K+ transporting, alpha 2 polypeptide [Source:MGI Symbol;Acc:MGI:88106]	protein_coding	0	0	0.077541	0	0	0	0	0.67061	0.784594	0	0	0
ENSMUSG00000007107	Atp1a4	1	-	172223513	172258414	ATPase, Na+/K+ transporting, alpha 4 polypeptide [Source:MGI Symbol;Acc:MGI:1351335]	protein_coding	0	0	0	0	0	0	0	0	0.060057	0	0.118773	0.330761
ENSMUSG00000007122	Casq1	1	-	172209894	172219868	calsequestrin 1 [Source:MGI Symbol;Acc:MGI:1309468]	protein_coding	0	0	0	0	0	0	0	0	0	0	0	0
ENSMUSG00000007207	Stx1a	5	+	135023482	135051100	syntaxin 1A (brain) [Source:MGI Symbol;Acc:MGI:109355]	protein_coding	0	0.249144	0.032273	0	0	0.694952	0	0	0.661538	0	0	0
ENSMUSG00000007209	Ceacam9	7	+	16721929	16726132	carcinoembryonic antigen-related cell adhesion molecule 9 [Source:MGI Symbol;Acc:MGI:1347247]	protein_coding	0	0	0	0	0	0	0	0	0	0	0	0
ENSMUSG00000007216	Zfp775	6	+	48602063	48623227	zinc finger protein 775 [Source:MGI Symbol;Acc:MGI:2683557]	protein_coding	0.166263	0.386684	0.385224	0.158331	0.140309	0.076554	0.204533	0.45288	0.080174	0.857309	0.498062	0
ENSMUSG00000007279	Scube2	7	-	109798676	109865679	signal peptide, CUB domain, EGF-like 2 [Source:MGI Symbol;Acc:MGI:1928765]	protein_coding	0	0	0	0	0	0	0	0	0	0	0.128152	0
ENSMUSG00000007338	Mrpl49	19	-	6053622	6057785	mitochondrial ribosomal protein L49 [Source:MGI Symbol;Acc:MGI:108180]	protein_coding	11.2828	14.9843	11.5703	16.2418	16.783	12.02	9.59893	11.1694	9.24374	5.55502	7.40496	16.285
ENSMUSG00000007379	Dennd2c	3	+	103102604	103169769	DENN/MADD domain containing 2C [Source:MGI Symbol;Acc:MGI:3036254]	protein_coding	0.175365	0.15114	0.093406	0.101469	0.024494	0	0.774765	0.571782	1.20218	0	0.114336	1.0377
ENSMUSG00000007411	Mark3	12	+	111574523	111656221	MAP/microtubule affinity regulating kinase 3 [Source:MGI Symbol;Acc:MGI:1341865]	protein_coding	17.4336	12.7289	12.0517	12.8647	9.12857	12.1526	14.5346	18.9076	18.5533	16.7581	13.015	16.1587
ENSMUSG00000007415	Gatad1	5	-	3632932	3657185	GATA zinc finger domain containing 1 [Source:MGI Symbol;Acc:MGI:1914460]	protein_coding	29.9414	23.8016	32.4037	22.0476	24.7937	23.1949	33.3175	28.1569	31.313	24.7544	23.1318	20.8585
ENSMUSG00000007440	Pcdha11	18	+	37005203	37187657	protocadherin alpha 11 [Source:MGI Symbol;Acc:MGI:1298372]	protein_coding	0	0	0	0	0	0	0	0	0	0	0	0
ENSMUSG00000007457	2310003L06Rik	5	+	87969459	87972870	RIKEN cDNA 2310003L06 gene [Source:MGI Symbol;Acc:MGI:1921498]	protein_coding	0	0	0	0	0.074029	0	0.116039	0.066653	0.265119	0.419434	0.376633	2.57993
ENSMUSG00000007458	M6pr	6	+	122308720	122317680	mannose-6-phosphate receptor, cation dependent [Source:MGI Symbol;Acc:MGI:96904]	protein_coding	122.074	101.454	84.08	149.531	139.343	127.838	79.4504	66.1421	57.9818	47.0024	32.8575	37.9583
ENSMUSG00000007476	Lrrc8a	2	+	30237715	30263790	leucine rich repeat containing 8A VRAC subunit A [Source:MGI Symbol;Acc:MGI:2652847]	protein_coding	1.52137	1.00317	1.51415	1.222	1.64015	1.65634	1.53789	1.50664	0.948987	0.476009	0.837441	0.351821
ENSMUSG00000007480	Mc5r	18	+	68337596	68342446	melanocortin 5 receptor [Source:MGI Symbol;Acc:MGI:99420]	protein_coding	0	0	0	0.011588	0	0	0	0	0.255248	0	0.254214	0.376885
ENSMUSG00000007564	Ppp2r1a	17	+	20945311	20965916	protein phosphatase 2, regulatory subunit A, alpha [Source:MGI Symbol;Acc:MGI:1926334]	protein_coding	74.1874	56.1573	64.3668	73.1832	66.0174	81.8272	32.533	38.6638	32.8273	12.8682	32.257	12.6735
ENSMUSG00000007570	Fance	17	+	28313519	28326572	Fanconi anemia, complementation group E [Source:MGI Symbol;Acc:MGI:1920025]	protein_coding	3.58079	2.73775	2.10799	7.5286	3.77627	3.15613	6.36092	5.31544	4.62782	3.26234	4.87202	2.78155
ENSMUSG00000007589	Tinf2	14	-	55674689	55681820	Terf1 (TRF1)-interacting nuclear factor 2 [Source:MGI Symbol;Acc:MGI:107246]	protein_coding	4.09054	4.54012	3.44759	8.89471	8.43377	4.86171	4.46581	4.56052	3.56389	12.5982	3.32861	1.64922
ENSMUSG00000007591	Tssk4	14	+	55650184	55652539	testis-specific serine kinase 4 [Source:MGI Symbol;Acc:MGI:1918349]	protein_coding	0.199914	0	0	0	0	0	0.345689	0	0	0	0.165147	0
ENSMUSG00000007594	Hapln4	8	+	70083457	70090862	hyaluronan and proteoglycan link protein 4 [Source:MGI Symbol;Acc:MGI:2679531]	protein_coding	0	0	0	0	0	0	0	0	0.128721	0.6486	0	0
ENSMUSG00000007603	Dus3l	17	+	56764757	56770093	dihydrouridine synthase 3-like (S. cerevisiae) [Source:MGI Symbol;Acc:MGI:2147092]	protein_coding	7.44346	4.61	6.23795	8.3028	7.86727	6.36954	6.54477	6.78412	6.98538	1.92257	3.71701	2.77748
ENSMUSG00000007610	Gtpbp3	8	+	71488103	71499583	GTP binding protein 3 [Source:MGI Symbol;Acc:MGI:1917609]	protein_coding	2.59733	2.8416	2.59936	6.44555	6.80933	4.10541	2.83484	2.20745	3.11951	1.46257	2.24198	1.345
ENSMUSG00000007613	Tgfbr1	4	+	47353222	47414931	transforming growth factor, beta receptor I [Source:MGI Symbol;Acc:MGI:98728]	protein_coding	11.2752	8.26431	9.30296	6.58987	4.11241	4.68465	10.6094	7.87184	6.87101	3.01488	4.52897	3.23156
ENSMUSG00000007617	Homer1	13	+	93299635	93405129	homer scaffolding protein 1 [Source:MGI Symbol;Acc:MGI:1347345]	protein_coding	3.10051	2.48433	3.06507	1.97452	1.91682	3.7107	2.57532	2.06164	3.31207	1.7254	2.89491	3.40986
ENSMUSG00000007646	Rad51c	11	-	87376645	87404954	RAD51 paralog C [Source:MGI Symbol;Acc:MGI:2150020]	protein_coding	1.12389	0.737535	0.751938	0.037605	0.789794	2.88718	1.25593	0.979833	1.02379	1.19986	2.41562	4.73952
ENSMUSG00000007653	Gabrb2	11	+	42419757	42629028	gamma-aminobutyric acid (GABA) A receptor, subunit beta 2 [Source:MGI Symbol;Acc:MGI:95620]	protein_coding	0	0	0	0	0	0	0	0.088137	0.03673	0.094233	0.410862	0.595262
ENSMUSG00000007655	Cav1	6	+	17306335	17341452	caveolin 1, caveolae protein [Source:MGI Symbol;Acc:MGI:102709]	protein_coding	0.076626	0	0.174468	0	0	0	0.213251	0.624282	0	0	0	0
ENSMUSG00000007656	Arpp19	9	+	75037614	75060313	cAMP-regulated phosphoprotein 19 [Source:MGI Symbol;Acc:MGI:1891691]	protein_coding	34.8825	36.0542	37.4316	40.9023	34.8376	77.1303	89.9348	92.3256	76.7819	76.8915	75.3432	54.0255
ENSMUSG00000007659	Bcl2l1	2	-	152780668	152831728	BCL2-like 1 [Source:MGI Symbol;Acc:MGI:88139]	protein_coding	13.3474	11.4762	8.43991	6.80959	5.60499	11.6888	6.95682	6.78567	8.5661	3.6157	8.50483	2.90443
ENSMUSG00000007670	Khsrp	17	-	57021051	57031522	KH-type splicing regulatory protein [Source:MGI Symbol;Acc:MGI:1336214]	protein_coding	9.5755	9.86536	8.82594	14.3963	11.5544	14.5961	11.7225	14.8065	13.0548	12.1183	10.334	9.82519
ENSMUSG00000007682	Dio2	12	-	90724552	90738438	deiodinase, iodothyronine, type II [Source:MGI Symbol;Acc:MGI:1338833]	protein_coding	1.1765	1.18571	1.08155	1.4925	1.62723	2.6981	2.05556	1.43056	1.21481	1.76021	1.83803	1.36284
ENSMUSG00000007721	Ccdc124	8	-	70868227	70873935	coiled-coil domain containing 124 [Source:MGI Symbol;Acc:MGI:1916403]	protein_coding	69.2914	75.3927	78.9443	96.779	99.1689	129.621	71.0912	105.296	92.8811	65.6394	70.5329	55.1682
ENSMUSG00000007739	Cct4	11	+	22990519	23003780	chaperonin containing Tcp1, subunit 4 (delta) [Source:MGI Symbol;Acc:MGI:104689]	protein_coding	118.812	104.344	103.172	193.348	150.062	152.622	70.8573	65.9575	66.9373	47.6671	58.0859	42.4181
ENSMUSG00000007777	0610009B22Rik	11	-	51685386	51688874	RIKEN cDNA 0610009B22 gene [Source:MGI Symbol;Acc:MGI:1913300]	protein_coding	85.0417	78.63	72.0655	74.1569	73.2767	71.1231	15.0403	16.8005	18.5499	10.9848	20.0369	25.5569
ENSMUSG00000007783	Cpt1c	7	-	44959372	44974851	carnitine palmitoyltransferase 1c [Source:MGI Symbol;Acc:MGI:2446526]	protein_coding	0.091228	0	0	0.377555	0.360218	0	0	0.550422	0	0.075164	0	0.12577
ENSMUSG00000007805	Twist2	1	+	91801461	91848028	twist basic helix-loop-helix transcription factor 2 [Source:MGI Symbol;Acc:MGI:104685]	protein_coding	0.006645	0	0	0	0	0	0	0	0.121097	0	0.078611	1.27708
ENSMUSG00000007812	Zfp655	5	+	145231715	145247302	zinc finger protein 655 [Source:MGI Symbol;Acc:MGI:1919861]	protein_coding	26.7741	18.7949	14.6428	10.3873	16.1498	10.0886	5.18316	9.5034	7.65376	6.84127	9.11869	3.86771
ENSMUSG00000007815	Rhoa	9	+	108306129	108337934	ras homolog family member A [Source:MGI Symbol;Acc:MGI:1096342]	protein_coding	171.351	194.472	160.238	206.494	167.097	196.567	49.4069	60.8305	41.1859	41.3694	52.9954	41.6371
ENSMUSG00000007817	Zmiz1	14	+	25459185	25666743	zinc finger, MIZ-type containing 1 [Source:MGI Symbol;Acc:MGI:3040693]	protein_coding	10.4462	9.92232	9.45378	3.85366	4.5947	6.09564	10.8023	7.59109	8.76188	4.98273	7.28113	4.40156
ENSMUSG00000007827	Ankrd26	6	-	118501308	118562226	ankyrin repeat domain 26 [Source:MGI Symbol;Acc:MGI:1917887]	protein_coding	0.656365	0.338729	0.371756	1.31706	0.468289	0.560934	2.42021	2.52363	2.06872	1.80951	1.44941	2.04661
ENSMUSG00000007833	Aldh16a1	7	-	45140684	45154584	aldehyde dehydrogenase 16 family, member A1 [Source:MGI Symbol;Acc:MGI:1916998]	protein_coding	6.85727	5.16933	5.64177	5.68718	4.0171	6.19258	6.62873	9.54416	8.83363	5.53154	3.44568	4.48632
ENSMUSG00000007836	Hnrnpa0	13	-	58125879	58128556	heterogeneous nuclear ribonucleoprotein A0 [Source:MGI Symbol;Acc:MGI:1924384]	protein_coding	11.719	12.0093	14.9481	10.701	14.4832	16.9662	29.8358	35.3657	29.0317	19.8013	24.8978	25.9685
ENSMUSG00000007837	Prrg2	7	-	45053584	45062677	proline-rich Gla (G-carboxyglutamic acid) polypeptide 2 [Source:MGI Symbol;Acc:MGI:1929596]	protein_coding	1.966	4.23326	5.11204	3.66788	7.37602	8.76525	4.37328	5.59593	4.10146	11.9537	5.10429	2.73014
ENSMUSG00000007850	Hnrnph1	11	+	50376990	50386528	heterogeneous nuclear ribonucleoprotein H1 [Source:MGI Symbol;Acc:MGI:1891925]	protein_coding	119.168	92.5596	62.3249	62.5565	87.9395	101.561	107.145	85.5736	95.3492	47.2476	49.3387	27.5444
ENSMUSG00000007867	Ift43	12	+	86082541	86162459	intraflagellar transport 43 [Source:MGI Symbol;Acc:MGI:1923661]	protein_coding	2.89535	3.51164	1.18558	0	0.920804	0	0	2.93449	2.10677	0	0	2.11505
ENSMUSG00000007872	Id3	4	+	136143497	136145755	inhibitor of DNA binding 3 [Source:MGI Symbol;Acc:MGI:96398]	protein_coding	0	0	0.058143	0	0	0	0	0	0	0	0	0
ENSMUSG00000007877	Tcap	11	+	98383811	98384953	titin-cap [Source:MGI Symbol;Acc:MGI:1330233]	protein_coding	0	0	1.45822	0	0	0	0.465098	0	0.996428	0	0.357688	0
ENSMUSG00000007880	Arid1a	4	-	133679008	133756769	AT rich interactive domain 1A (SWI-like) [Source:MGI Symbol;Acc:MGI:1935147]	protein_coding	10.74	10.3945	10.3952	10.0106	8.21418	12.7848	10.6991	15.4443	12.0383	6.86307	8.24556	8.55269
ENSMUSG00000007888	Crlf1	8	+	70493158	70504081	cytokine receptor-like factor 1 [Source:MGI Symbol;Acc:MGI:1340030]	protein_coding	0	0	0	0	0	0	0	0	0	0	0	0
ENSMUSG00000007891	Ctsd	7	-	142375911	142388038	cathepsin D [Source:MGI Symbol;Acc:MGI:88562]	protein_coding	831.3	671.844	671.403	661.971	520.713	486.686	222.634	241.214	229.633	109.334	110.794	70.5618
ENSMUSG00000007892	Rplp1	9	-	61913284	61914542	ribosomal protein, large, P1 [Source:MGI Symbol;Acc:MGI:1927099]	protein_coding	434.147	630.992	837.244	649.078	843.917	914.329	1470.45	1543.73	1453.4	2499.01	2361.3	1818.1
ENSMUSG00000007907	Cabs1	5	+	87979439	87981544	calcium binding protein, spermatid specific 1 [Source:MGI Symbol;Acc:MGI:1918227]	protein_coding	0	0	0	0	0	0	0	0	0	0	0	0
ENSMUSG00000007908	Hmgcll1	9	+	76014855	76136350	3-hydroxymethyl-3-methylglutaryl-Coenzyme A lyase-like 1 [Source:MGI Symbol;Acc:MGI:2446108]	protein_coding	0.064765	0	0	0.018082	0.031111	0	0	0.062012	0.062585	4.61399	0.21873	0.063942
ENSMUSG00000007944	Ttc9b	7	+	27653915	27657346	tetratricopeptide repeat domain 9B [Source:MGI Symbol;Acc:MGI:1920282]	protein_coding	0	0	0	0	0	0	0	0.192441	0	0	0	0
ENSMUSG00000007946	Phox2a	7	+	101818313	101822726	paired-like homeobox 2a [Source:MGI Symbol;Acc:MGI:106633]	protein_coding	0	0	0	0	0	0	0	0	0	0.019383	0	0
ENSMUSG00000007950	Abhd8	8	-	71456705	71463655	abhydrolase domain containing 8 [Source:MGI Symbol;Acc:MGI:1918946]	protein_coding	3.05791	3.18041	3.2113	4.29519	6.14706	5.83829	3.57646	5.33622	4.75275	4.39429	4.8962	3.25547
ENSMUSG00000007987	Ift22	5	+	136908150	136915404	intraflagellar transport 22 [Source:MGI Symbol;Acc:MGI:1914536]	protein_coding	2.45661	2.3089	3.10382	1.84359	1.98618	2.50709	1.61004	2.56904	1.68612	1.37551	1.81199	1.44531
ENSMUSG00000007989	Fzd3	14	-	65192449	65262463	frizzled class receptor 3 [Source:MGI Symbol;Acc:MGI:108476]	protein_coding	0.309929	0.390443	0.244349	0.551667	1.2335	0.284362	0.177777	0.402404	0.483888	0.534458	0.537659	2.81004
ENSMUSG00000008028	1700008O03Rik	7	-	44360043	44385820	RIKEN cDNA 1700008O03 gene [Source:MGI Symbol;Acc:MGI:1916599]	protein_coding	1.19413	0.857088	0.828616	0	0	3.74656	1.12232	0	0.715482	4.03619	0	2.22413
ENSMUSG00000008035	Mid1ip1	X	+	10715013	10719690	Mid1 interacting protein 1 (gastrulation specific G12-like (zebrafish)) [Source:MGI Symbol;Acc:MGI:1915291]	protein_coding	34.849	30.9953	35.2584	49.5561	41.1402	32.1764	34.2881	24.5474	26.0715	30.1665	27.8769	33.984
ENSMUSG00000008036	Ap2s1	7	+	16738410	16749294	adaptor-related protein complex 2, sigma 1 subunit [Source:MGI Symbol;Acc:MGI:2141861]	protein_coding	162.011	191.334	201.552	204.86	228.866	245.426	183.069	200.074	172.946	182.937	250.247	195.89
ENSMUSG00000008090	Fgfrl1	5	+	108692382	108706924	fibroblast growth factor receptor-like 1 [Source:MGI Symbol;Acc:MGI:2150920]	protein_coding	0	0.241481	0.419748	0	0	0.968548	0	0	0.204148	0	0	0
ENSMUSG00000008129	4930432K21Rik	8	+	84148025	84172590	RIKEN cDNA 4930432K21 gene [Source:MGI Symbol;Acc:MGI:1921916]	protein_coding	0.236393	0.485794	0.261716	0.162524	0.160184	0.915975	0.994955	0.826582	0.48194	0.058153	0.547051	0.408753
ENSMUSG00000008136	Fhl2	1	-	43123074	43196984	four and a half LIM domains 2 [Source:MGI Symbol;Acc:MGI:1338762]	protein_coding	0	0	1.18283	0	0	0	0	0	0	0.325709	0	0
ENSMUSG00000008140	Emc10	7	-	44489937	44496529	ER membrane protein complex subunit 10 [Source:MGI Symbol;Acc:MGI:1916933]	protein_coding	33.4962	36.7822	27.1046	46.6896	53.288	40.6903	16.5161	19.9925	21.8279	20.4442	23.2974	15.4689
ENSMUSG00000008153	Clstn3	6	-	124430581	124464794	calsyntenin 3 [Source:MGI Symbol;Acc:MGI:2178323]	protein_coding	2.35262	2.91185	2.68496	5.41206	2.67434	4.07261	2.1296	4.99317	5.15563	5.12143	4.9403	1.76295
ENSMUSG00000008167	Fbxw9	8	+	85060055	85067124	F-box and WD-40 domain protein 9 [Source:MGI Symbol;Acc:MGI:1915878]	protein_coding	6.77444	6.9225	8.2632	9.61837	6.00537	11.1065	7.53754	5.3812	6.22527	2.14059	3.72869	2.95855
ENSMUSG00000008193	Spib	7	-	44525993	44532071	Spi-B transcription factor (Spi-1/PU.1 related) [Source:MGI Symbol;Acc:MGI:892986]	protein_coding	0	0	0	0	0.588594	0	0	0	0.554245	0	0	0
ENSMUSG00000008200	Fnbp4	2	+	90745370	90781021	formin binding protein 4 [Source:MGI Symbol;Acc:MGI:1860513]	protein_coding	21.294	15.5451	20.5246	16.7057	13.906	12.8875	33.4983	23.2059	32.1155	20.0269	23.7858	20.0868
ENSMUSG00000008206	Cers4	8	+	4493026	4531680	ceramide synthase 4 [Source:MGI Symbol;Acc:MGI:1914510]	protein_coding	0	0	0.033399	0.163544	0	0.017099	0.150582	0.042591	0.124667	0.223361	0.089614	0.088566
ENSMUSG00000008226	Scrn3	2	+	73312601	73337818	secernin 3 [Source:MGI Symbol;Acc:MGI:1921866]	protein_coding	4.34201	4.45959	4.47971	4.18679	3.36781	2.37089	0.907198	2.16688	2.46933	1.64019	0.718988	2.50588
ENSMUSG00000008301	Phax	18	+	56562443	56587712	phosphorylated adaptor for RNA export [Source:MGI Symbol;Acc:MGI:1891839]	protein_coding	27.6471	31.5119	27.4985	19.5695	20.4739	25.6817	25.7858	29.7672	25.1421	7.07916	18.0428	13.8722
ENSMUSG00000008305	Tle1	4	-	72117142	72200919	transducin-like enhancer of split 1 [Source:MGI Symbol;Acc:MGI:104636]	protein_coding	3.30232	2.34794	2.30541	12.6119	3.22073	2.21597	2.21523	3.55907	4.70167	3.19113	5.39877	3.41527
ENSMUSG00000008307	1700109H08Rik	5	+	3571566	3584356	RIKEN cDNA 1700109H08 gene [Source:MGI Symbol;Acc:MGI:1924286]	protein_coding	0.626064	0.100987	0.455664	0.530347	0.075014	1.49897	1.96225	1.41857	0.77567	3.38461	0.144835	0.089557
ENSMUSG00000008318	Relt	7	-	100845847	100863446	RELT tumor necrosis factor receptor [Source:MGI Symbol;Acc:MGI:2443373]	protein_coding	10.5311	6.74728	9.38331	10.6203	10.1287	4.9302	6.30739	9.13192	7.62659	3.89169	4.46834	2.10328
ENSMUSG00000008333	Snrpb2	2	+	143063039	143072853	U2 small nuclear ribonucleoprotein B [Source:MGI Symbol;Acc:MGI:104805]	protein_coding	45.6483	48.8809	53.6806	54.2643	56.6166	68.0324	62.6986	62.9642	59.5152	57.7817	46.4159	51.2846
ENSMUSG00000008348	Ubc	5	-	125385965	125390202	ubiquitin C [Source:MGI Symbol;Acc:MGI:98889]	protein_coding	192.266	162.095	189.197	124.471	109.567	117.158	101.853	103.704	108.324	53.4359	62.4877	47.2907
ENSMUSG00000008373	Prpf31	7	+	3629985	3642486	pre-mRNA processing factor 31 [Source:MGI Symbol;Acc:MGI:1916238]	protein_coding	19.6757	16.4251	13.4198	28.1847	25.7224	37.3611	16.8842	16.4723	11.6818	11.53	13.5599	36.8698
ENSMUSG00000008384	Sertad1	7	+	27486910	27490316	SERTA domain containing 1 [Source:MGI Symbol;Acc:MGI:1913438]	protein_coding	14.0658	16.7242	19.6018	32.9524	20.8077	29.0849	19.8409	19.6454	17.5563	18.8944	9.64885	14.9424
ENSMUSG00000008393	Carhsp1	16	-	8658580	8672155	calcium regulated heat stable protein 1 [Source:MGI Symbol;Acc:MGI:1196368]	protein_coding	14.1918	14.0609	15.86	15.3891	16.1228	17.0411	11.038	12.7097	12.9016	6.47887	5.37617	3.63075
ENSMUSG00000008398	Elk3	10	-	93247414	93311135	ELK3, member of ETS oncogene family [Source:MGI Symbol;Acc:MGI:101762]	protein_coding	9.44724	5.97336	7.51211	4.48077	2.32765	6.33622	5.41498	5.03048	3.40808	3.02585	2.75531	1.85089
ENSMUSG00000008429	Herpud2	9	-	25108132	25151820	HERPUD family member 2 [Source:MGI Symbol;Acc:MGI:1915393]	protein_coding	17.5684	14.0844	12.2024	13.8207	19.5808	17.5663	9.38641	7.86512	5.52858	6.27252	8.26453	7.41364
ENSMUSG00000008435	Rdh13	7	-	4424770	4445649	retinol dehydrogenase 13 (all-trans and 9-cis) [Source:MGI Symbol;Acc:MGI:1918732]	protein_coding	2.26796	0.950598	1.87291	0.910538	0.842445	1.47474	0.776172	1.5569	2.12054	0.376823	0	1.52371
ENSMUSG00000008438	Adam21	12	-	81558584	81568474	a disintegrin and metallopeptidase domain 21 [Source:MGI Symbol;Acc:MGI:1861229]	protein_coding	0	0	0	0	0	1.09986	0	0.074399	0	0	0	0
ENSMUSG00000008450	Nutf2	8	+	105860580	105879330	nuclear transport factor 2 [Source:MGI Symbol;Acc:MGI:1915301]	protein_coding	106.183	126.38	113.268	241.158	221.307	177.46	28.0026	22.096	24.4449	5.57659	11.9668	7.18281
ENSMUSG00000008461	Fut1	7	+	45617289	45621059	fucosyltransferase 1 [Source:MGI Symbol;Acc:MGI:109375]	protein_coding	0	0	0	0	0	0.033285	0	0	0	0	0	0
ENSMUSG00000008475	Arpc5	1	+	152766542	152775597	actin related protein 2/3 complex, subunit 5 [Source:MGI Symbol;Acc:MGI:1915021]	protein_coding	637.158	605.156	506.174	557.236	513.022	509.71	185.564	169.63	174.261	157.097	138.578	114.428
ENSMUSG00000008482	Rnf151	17	-	24715839	24718063	ring finger protein 151 [Source:MGI Symbol;Acc:MGI:1914754]	protein_coding	0.284025	0.140463	0	0.104705	0	0	0.157963	0	0	0	0	0
ENSMUSG00000008489	Elavl2	4	-	91250763	91400785	ELAV like RNA binding protein 1 [Source:MGI Symbol;Acc:MGI:1100887]	protein_coding	0	0	0	0.038737	0.005433	0.161805	0.236525	0.247791	1.30857	0.777035	0.692075	0.960055
ENSMUSG00000008496	Pou2f2	7	-	25087344	25179726	POU domain, class 2, transcription factor 2 [Source:MGI Symbol;Acc:MGI:101897]	protein_coding	0.041324	0.021386	0.03988	0.191608	0.156086	0.345224	0.776414	0.957478	1.06164	0.701934	1.12526	1.50099
ENSMUSG00000008540	Mgst1	6	+	138140316	138156755	microsomal glutathione S-transferase 1 [Source:MGI Symbol;Acc:MGI:1913850]	protein_coding	2348.26	2852.88	2310.38	1168.72	1007.43	902.179	269.709	245.31	193.219	75.406	107.27	52.8442
ENSMUSG00000008575	Nfib	4	-	82290173	82705750	nuclear factor I/B [Source:MGI Symbol;Acc:MGI:103188]	protein_coding	0.011399	0	0	0	0.085908	0.017741	0.246142	0.733565	0.780256	0.871697	1.18985	2.99205
ENSMUSG00000008590	Htr3b	9	-	48935008	48964990	5-hydroxytryptamine (serotonin) receptor 3B [Source:MGI Symbol;Acc:MGI:1861899]	protein_coding	0	0	0	0	0	0	0	0	0	0	0	0
ENSMUSG00000008601	Rab25	3	-	88542029	88548300	RAB25, member RAS oncogene family [Source:MGI Symbol;Acc:MGI:1858203]	protein_coding	0.166656	0.409244	0.945506	0	0	0.551621	1.21981	0.395355	0.39681	0.382083	3.77444	0
ENSMUSG00000008604	Ubqln4	3	+	88553758	88569725	ubiquilin 4 [Source:MGI Symbol;Acc:MGI:2150152]	protein_coding	7.18618	3.41231	5.70644	5.79143	6.09532	5.34796	7.64212	7.6344	6.06879	9.65832	8.10942	8.16802
ENSMUSG00000008658	Rbfox1	16	+	5885355	7411526	RNA binding protein, fox-1 homolog (C. elegans) 1 [Source:MGI Symbol;Acc:MGI:1926224]	protein_coding	0	0	0.0704	0	0	0	0	0.241978	0.208109	0.649222	0.333091	1.01607
ENSMUSG00000008668	Rps18	17	-	33951999	33956001	ribosomal protein S18 [Source:MGI Symbol;Acc:MGI:98146]	protein_coding	152.721	186.07	226.959	186.081	255.122	234.919	341.323	406.885	385.203	424.385	425.966	360.413
ENSMUSG00000008682	Rpl10	X	+	74270812	74273135	ribosomal protein L10 [Source:MGI Symbol;Acc:MGI:105943]	protein_coding	880.469	1147.69	1228	1254.73	1340.98	1231.21	820.549	1035.62	822.03	461.832	621.691	301.672
ENSMUSG00000008683	Rps15a	7	-	118104372	118116188	ribosomal protein S15A [Source:MGI Symbol;Acc:MGI:2389091]	protein_coding	49.1362	67.524	72.2153	72.9436	80.0369	92.4105	144.617	144.984	148.306	132.093	114.786	102.433
ENSMUSG00000008690	Ncaph2	15	+	89355719	89372826	non-SMC condensin II complex, subunit H2 [Source:MGI Symbol;Acc:MGI:1289164]	protein_coding	35.0326	28.4623	33.8482	47.5947	40.8367	41.8362	39.4417	64.9226	57.7629	112.375	78.0123	92.96
ENSMUSG00000008730	Hipk1	3	-	103739815	103791563	homeodomain interacting protein kinase 1 [Source:MGI Symbol;Acc:MGI:1314873]	protein_coding	68.7133	46.6283	49.6013	33.0474	38.4484	32.0248	23.5312	23.1304	23.76	16.0537	12.3142	12.2254
ENSMUSG00000008734	Gprc5b	7	-	118972047	118995211	G protein-coupled receptor, family C, group 5, member B [Source:MGI Symbol;Acc:MGI:1927596]	protein_coding	0.239969	0.206136	0.491522	0.237622	0.225968	0	0.232989	0.56343	0.49101	0	0	0.50724
ENSMUSG00000008763	Man1a2	3	-	100562208	100685503	mannosidase, alpha, class 1A, member 2 [Source:MGI Symbol;Acc:MGI:104676]	protein_coding	5.92343	4.9219	5.75018	6.96073	4.11634	3.60022	8.37145	9.74957	9.00561	7.24363	3.82387	5.20805
ENSMUSG00000008789	Ceacam5	7	+	17713238	17761132	carcinoembryonic antigen-related cell adhesion molecule 5 [Source:MGI Symbol;Acc:MGI:1920500]	protein_coding	0	0	0	0	0	0	0	0	0	0	0	0
ENSMUSG00000008813	Tppp2	14	+	51918425	51920700	tubulin polymerization-promoting protein family member 2 [Source:MGI Symbol;Acc:MGI:2684923]	protein_coding	0	0	0	0	0	0	0	0	0	0	0	0
ENSMUSG00000008822	Acyp1	12	-	85272398	85288438	acylphosphatase 1, erythrocyte (common) type [Source:MGI Symbol;Acc:MGI:1913454]	protein_coding	18.1578	30.4628	26.5421	33.368	40.6313	37.3368	13.6368	19.7199	13.7066	10.3287	18.8031	5.27005
ENSMUSG00000008843	Cldn13	5	-	134914249	134915526	claudin 13 [Source:MGI Symbol;Acc:MGI:1913102]	protein_coding	0	0.179136	0.197451	0	0	0	0	0	0	0	0	0
ENSMUSG00000008845	Cd163	6	+	124304656	124330527	CD163 antigen [Source:MGI Symbol;Acc:MGI:2135946]	protein_coding	0	0.015607	0	0	0	0	0	0.064182	0	0	0.069804	0.389181
ENSMUSG00000008855	Hdac5	11	-	102194432	102230166	histone deacetylase 5 [Source:MGI Symbol;Acc:MGI:1333784]	protein_coding	10.8483	8.88456	15.0565	9.83043	6.80165	7.03392	27.9938	22.8764	23.074	3.09017	13.6435	3.20001
ENSMUSG00000008859	Rala	13	-	17880571	17944239	v-ral simian leukemia viral oncogene A (ras related) [Source:MGI Symbol;Acc:MGI:1927243]	protein_coding	23.2961	28.1203	23.4168	32.5576	19.7023	32.0153	17.4579	16.6016	20.151	15.7788	9.46937	13.3031
ENSMUSG00000008874	Clec3a	8	+	114418086	114425846	C-type lectin domain family 3, member a [Source:MGI Symbol;Acc:MGI:2685642]	protein_coding	42.7481	48.3209	27.1759	12.3933	15.4366	11.1027	0.625979	0.955236	1.10559	0	1.0169	0
ENSMUSG00000008892	Vdac3	8	-	22577075	22593813	voltage-dependent anion channel 3 [Source:MGI Symbol;Acc:MGI:106922]	protein_coding	219.297	194.075	175.634	259.364	207.357	252.828	62.7081	63.9809	46.0619	34.5614	40.9619	23.6509
ENSMUSG00000008932	Slc1a7	4	+	107968332	108013532	solute carrier family 1 (glutamate transporter), member 7 [Source:MGI Symbol;Acc:MGI:2444087]	protein_coding	0	0	0	0.470528	0	0	0	0	0	0	0	0
ENSMUSG00000008958	Vps72	3	+	95111022	95123051	vacuolar protein sorting 72 [Source:MGI Symbol;Acc:MGI:1202305]	protein_coding	40.9083	32.7943	25.1012	31.4964	31.6358	22.9795	16.2579	14.9545	17.4209	3.06626	8.79325	16.225
ENSMUSG00000008976	Gabpa	16	+	84834925	84863779	GA repeat binding protein, alpha [Source:MGI Symbol;Acc:MGI:95610]	protein_coding	7.59182	7.75056	6.61859	14.075	13.0363	8.81638	4.69334	3.57564	5.24649	4.96438	4.73707	4.80171
ENSMUSG00000008999	Bmp7	2	-	172868012	172940321	bone morphogenetic protein 7 [Source:MGI Symbol;Acc:MGI:103302]	protein_coding	0	0	0	0	0.148609	0	0	0	0	0	0	0
ENSMUSG00000009013	Dynll1	5	-	115297110	115300999	dynein light chain LC8-type 1 [Source:MGI Symbol;Acc:MGI:1861457]	protein_coding	44.9028	94.7439	79.3026	108.767	125.457	116.32	82.3337	66.7611	62.2838	37.3828	43.9689	34.9739
ENSMUSG00000009030	Pdcl	2	-	37350074	37359332	phosducin-like [Source:MGI Symbol;Acc:MGI:1914716]	protein_coding	20.9402	15.5264	12.431	12.6644	17.1457	19.0233	7.35811	6.92648	7.34267	6.62478	6.82451	5.6117
ENSMUSG00000009035	Tmem184b	15	-	79360684	79403569	transmembrane protein 184b [Source:MGI Symbol;Acc:MGI:2445179]	protein_coding	10.5561	8.3235	8.44305	5.55976	11.9266	11.2957	10.0773	10.191	9.47593	5.99274	4.4258	3.70873
ENSMUSG00000009047	Gm5965	16	+	88777896	88778728	predicted gene 5965 [Source:MGI Symbol;Acc:MGI:3645197]	protein_coding	0	0	0	0	0	0	0	0	0	0	0	0
ENSMUSG00000009070	Rsph14	10	-	74957477	75032586	radial spoke head homolog 14 (Chlamydomonas) [Source:MGI Symbol;Acc:MGI:1918486]	protein_coding	0	0	0	0	0	0	0	0	0	0	0	0
ENSMUSG00000009073	Nf2	11	-	4765845	4849536	neurofibromin 2 [Source:MGI Symbol;Acc:MGI:97307]	protein_coding	2.33096	2.06983	2.34725	2.39236	2.04831	3.20566	3.16622	4.53811	3.34707	2.53249	1.85085	2.88449
ENSMUSG00000009075	Cabp7	11	-	4736892	4746778	calcium binding protein 7 [Source:MGI Symbol;Acc:MGI:2183437]	protein_coding	0	0	0	0	0	0.00501	0	0.712432	0.13584	0	0	0
ENSMUSG00000009076	Zmat5	11	+	4704678	4737669	zinc finger, matrin type 5 [Source:MGI Symbol;Acc:MGI:1914428]	protein_coding	30.5056	39.7339	31.1442	38.7123	34.4323	34.9376	18.1702	14.8796	23.6609	11.1077	13.9903	10.9495
ENSMUSG00000009079	Ewsr1	11	-	5069689	5099266	Ewing sarcoma breakpoint region 1 [Source:MGI Symbol;Acc:MGI:99960]	protein_coding	54.3785	36.2895	34.8292	34.8237	25.3468	32.622	63.1418	45.6891	33.9363	36.8193	45.9624	30.5583
ENSMUSG00000009090	Ap1b1	11	+	4986824	5042791	adaptor protein complex AP-1, beta 1 subunit [Source:MGI Symbol;Acc:MGI:1096368]	protein_coding	5.70466	3.84936	4.40462	8.32807	4.95372	6.8174	4.96432	6.13582	5.07946	5.9679	5.13739	5.43689
ENSMUSG00000009092	Derl3	10	+	75893413	75895941	Der1-like domain family, member 3 [Source:MGI Symbol;Acc:MGI:1917627]	protein_coding	1.34478	1.56907	1.25468	2.99984	6.79826	3.90643	2.45332	3.94517	1.10086	0	0	0
ENSMUSG00000009093	Gstt4	10	-	75814943	75822543	glutathione S-transferase, theta 4 [Source:MGI Symbol;Acc:MGI:1923136]	protein_coding	0	0	0	0	0	0	0	0	0.759933	0.949075	1.23971	0
ENSMUSG00000009097	Tbx1	16	-	18580979	18590671	T-box 1 [Source:MGI Symbol;Acc:MGI:98493]	protein_coding	0	0	0	0	0	0	0	0.085964	0	0	0	0
ENSMUSG00000009108	Gnat2	3	+	108092789	108101432	guanine nucleotide binding protein, alpha transducing 2 [Source:MGI Symbol;Acc:MGI:95779]	protein_coding	0	0.358773	0.182847	0.014328	0	0.025919	0	0	0	0	0	0
ENSMUSG00000009112	Bcl2l13	6	+	120836212	120892842	BCL2-like 13 (apoptosis facilitator) [Source:MGI Symbol;Acc:MGI:2136959]	protein_coding	4.11871	3.88112	4.47218	5.14319	4.56871	2.88831	2.35249	1.99294	1.71232	1.63825	1.47941	2.17475
ENSMUSG00000009114	2610028H24Rik	10	+	76449081	76461110	RIKEN cDNA 2610028H24 gene [Source:MGI Symbol;Acc:MGI:1924214]	protein_coding	0	0	0	0	0	0	0	0	0	0	0	0.821245
ENSMUSG00000009115	Spatc1l	10	+	76562272	76570201	spermatogenesis and centriole associated 1 like [Source:MGI Symbol;Acc:MGI:1923823]	protein_coding	0	0	0	0	0	0	0.136544	0	0	0	0	0
ENSMUSG00000009145	Dqx1	6	+	83057844	83067318	DEAQ RNA-dependent ATPase [Source:MGI Symbol;Acc:MGI:2136388]	protein_coding	0.643513	1.01156	0.673706	1.45117	1.89428	2.05595	2.69225	2.42954	1.47835	2.06084	2.1787	1.6002
ENSMUSG00000009185	Ccl8	11	+	82115185	82116799	chemokine (C-C motif) ligand 8 [Source:MGI Symbol;Acc:MGI:101878]	protein_coding	0	0	0	0	0	0	0	0	0	0	0	0
ENSMUSG00000009207	Lnpk	2	-	74520291	74579435	lunapark, ER junction formation factor [Source:MGI Symbol;Acc:MGI:1918115]	protein_coding	40.6085	30.6061	21.6567	27.8733	35.0412	39.2682	30.5336	20.6629	23.562	37.4795	19.6436	38.7745
ENSMUSG00000009210	Prr29	11	+	106365472	106377558	proline rich 29 [Source:MGI Symbol;Acc:MGI:1922823]	protein_coding	0.050032	0	0	0.155263	0	0	0	0.090241	0	0	0	0
ENSMUSG00000009214	Mymk	2	-	27061636	27072179	myomaker, myoblast fusion factor [Source:MGI Symbol;Acc:MGI:1913389]	protein_coding	0	0	0	0	0	0.016777	0	0	0	0	0	0
ENSMUSG00000009216	Fam163b	2	-	27110380	27142491	family with sequence similarity 163, member B [Source:MGI Symbol;Acc:MGI:1926106]	protein_coding	0	0	0	0	0	0	0	0.070509	0.073811	0	0	0
ENSMUSG00000009246	Trpm5	7	-	143069153	143094642	transient receptor potential cation channel, subfamily M, member 5 [Source:MGI Symbol;Acc:MGI:1861718]	protein_coding	0	0	0	0	0	0	0.229273	0	0	0.063646	0	0
ENSMUSG00000009248	Ascl2	7	-	142966829	142969264	achaete-scute family bHLH transcription factor 2 [Source:MGI Symbol;Acc:MGI:96920]	protein_coding	6.72075	8.10428	7.16878	11.8824	10.8545	8.74612	5.82075	7.06696	3.75517	3.59079	4.08627	2.67636
ENSMUSG00000009281	Rarres2	6	-	48569696	48572789	retinoic acid receptor responder (tazarotene induced) 2 [Source:MGI Symbol;Acc:MGI:1918910]	protein_coding	0.630119	0.560326	0.623928	0.023323	0	0	0	0	1.38985	0	0	0
ENSMUSG00000009291	Pttg1ip	10	+	77581720	77598732	pituitary tumor-transforming 1 interacting protein [Source:MGI Symbol;Acc:MGI:2652132]	protein_coding	62.7872	52.3161	48.903	59.526	46.7184	31.5507	17.2824	14.2247	16.3805	7.35844	7.5001	6.92338
ENSMUSG00000009292	Trpm2	10	-	77907722	77970563	transient receptor potential cation channel, subfamily M, member 2 [Source:MGI Symbol;Acc:MGI:1351901]	protein_coding	1.96991	3.24453	3.27445	2.60659	1.06773	2.31476	3.95728	3.7069	3.67589	2.3459	2.00048	1.47841
ENSMUSG00000009293	Ube2g2	10	+	77622275	77645993	ubiquitin-conjugating enzyme E2G 2 [Source:MGI Symbol;Acc:MGI:1343188]	protein_coding	17.5659	13.1081	10.4151	19.6584	23.1909	30.4288	8.14229	8.4978	5.34718	8.78888	3.52983	2.29842
ENSMUSG00000009350	Mpo	11	+	87793581	87804413	myeloperoxidase [Source:MGI Symbol;Acc:MGI:97137]	protein_coding	10.3175	6.38523	6.26196	175.681	168.609	135.951	113.136	113.503	90.0401	174.958	213.901	189.586
ENSMUSG00000009356	Lpo	11	-	87806428	87828289	lactoperoxidase [Source:MGI Symbol;Acc:MGI:1923363]	protein_coding	0.082396	0.558971	0.461197	0.253835	0.65392	0.030914	0.312206	0.295086	0.311638	0.378128	0.317043	0
ENSMUSG00000009376	Met	6	+	17463800	17573980	met proto-oncogene [Source:MGI Symbol;Acc:MGI:96969]	protein_coding	0.262984	0.191089	0.086662	0	0.183061	0.104133	0.250418	0.27365	0.204086	1.442	1.44663	0.90388
ENSMUSG00000009378	Slc16a12	19	-	34668403	34747289	solute carrier family 16 (monocarboxylic acid transporters), member 12 [Source:MGI Symbol;Acc:MGI:2147716]	protein_coding	0	0	0.052151	0	0	0	0	0	0	0.283623	0.701623	0
ENSMUSG00000009394	Syn2	6	+	115134902	115282006	synapsin II [Source:MGI Symbol;Acc:MGI:103020]	protein_coding	0	0	0	0	0	0	0.207084	0.633538	0.77661	0	1.38364	0
ENSMUSG00000009406	Elk1	X	-	20933395	20950608	ELK1, member of ETS oncogene family [Source:MGI Symbol;Acc:MGI:101833]	protein_coding	0.749693	0.432224	0.323346	0.926595	0.077754	0.175093	1.00325	2.02984	1.34703	2.42123	2.21744	0.828874
ENSMUSG00000009418	Nav1	1	-	135434580	135688105	neuron navigator 1 [Source:MGI Symbol;Acc:MGI:2183683]	protein_coding	2.92877	1.68481	1.31748	0.430865	0.838696	1.22214	2.83443	3.84986	2.44403	0.996165	1.99595	1.85997
ENSMUSG00000009470	Tnpo1	13	-	98839019	98926384	transportin 1 [Source:MGI Symbol;Acc:MGI:2681523]	protein_coding	8.96556	7.60926	7.68241	8.93022	7.41478	10.8478	6.73587	6.36031	5.18689	6.4002	6.46203	4.42605
ENSMUSG00000009471	Myod1	7	+	46376474	46379099	myogenic differentiation 1 [Source:MGI Symbol;Acc:MGI:97275]	protein_coding	0	0	0	0	0	0	0	0	0	0	0	0
ENSMUSG00000009487	Otog	7	+	46240987	46311434	otogelin [Source:MGI Symbol;Acc:MGI:1202064]	protein_coding	0	0	0.02327	0	0	0	0.055564	0	0	0.053388	0.21562	0
ENSMUSG00000009535	Rnmt	18	+	68300355	68324852	RNA (guanine-7-) methyltransferase [Source:MGI Symbol;Acc:MGI:1915147]	protein_coding	20.5382	20.2806	15.691	16.3991	16.3649	29.5937	12.1067	12.5956	13.0751	12.9526	7.83764	4.8597
ENSMUSG00000009545	Kcnq1	7	+	143106362	143427042	potassium voltage-gated channel, subfamily Q, member 1 [Source:MGI Symbol;Acc:MGI:108083]	protein_coding	0.014578	0	0.013386	0	0	0	0.057771	0	0.004206	0	0	0.165854
ENSMUSG00000009549	Srp14	2	-	118475850	118479711	signal recognition particle 14 [Source:MGI Symbol;Acc:MGI:107169]	protein_coding	194.072	259.386	235.06	260.049	242.113	244.719	109.385	107.352	99.418	122.001	108.232	47.2848
ENSMUSG00000009551	6330409D20Rik	2	-	32732620	32741016	RIKEN cDNA 6330409D20 gene [Source:MGI Symbol;Acc:MGI:1917980]	protein_coding	0	0.118035	0.049547	0	0	0	0	0	0	0	0	0
ENSMUSG00000009555	Cdk9	2	-	32705784	32713076	cyclin-dependent kinase 9 (CDC2-related kinase) [Source:MGI Symbol;Acc:MGI:1328368]	protein_coding	61.0554	53.5675	55.9653	62.083	46.9505	84.4915	36.3925	22.7071	17.5868	16.8143	21.4406	17.3786
ENSMUSG00000009563	Tor2a	2	+	32757234	32762244	torsin family 2, member A [Source:MGI Symbol;Acc:MGI:1353596]	protein_coding	24.3805	21.3867	17.0023	49.3063	30.171	34.9726	17.9301	15.7576	7.93106	4.84641	9.05567	17.5476
ENSMUSG00000009566	Fpgs	2	-	32682609	32704145	folylpolyglutamyl synthetase [Source:MGI Symbol;Acc:MGI:95576]	protein_coding	3.24837	3.00526	1.57436	10.7104	13.1105	8.0155	2.96	2.96837	2.69657	4.55255	6.61186	4.42521
ENSMUSG00000009569	Mrtfb	16	+	13256481	13417529	myocardin related transcription factor B [Source:MGI Symbol;Acc:MGI:3050795]	protein_coding	1.00752	2.99199	1.8821	2.10023	1.66352	3.76087	0.861325	1.42551	1.27076	1.01565	1.3915	0.818415
ENSMUSG00000009575	Cbx5	15	-	103191544	103239816	chromobox 5 [Source:MGI Symbol;Acc:MGI:109372]	protein_coding	7.02043	4.71458	5.17445	4.76747	8.37053	5.65632	19.7983	20.3705	19.0963	14.6414	14.0634	22.5701
ENSMUSG00000009580	Odam	5	+	87885029	87894174	odontogenic, ameloblast asssociated [Source:MGI Symbol;Acc:MGI:1916842]	protein_coding	0	0	0	0	0	0	0	0	0.201934	0	0	0
ENSMUSG00000009585	Apobec3	15	+	79891659	79915906	apolipoprotein B mRNA editing enzyme, catalytic polypeptide 3 [Source:MGI Symbol;Acc:MGI:1933111]	protein_coding	14.3766	17.1139	13.1534	12.2085	17.9113	16.0186	5.75835	8.95342	5.94572	3.71465	5.91333	7.91848
ENSMUSG00000009588	St6galnac1	11	-	116765025	116775507	ST6 (alpha-N-acetyl-neuraminyl-2,3-beta-galactosyl-1,3)-N-acetylgalactosaminide alpha-2,6-sialyltransferase 1 [Source:MGI Symbol;Acc:MGI:1341826]	protein_coding	0	0	0	0	0	0	0	0	0	0	0	3.66239
ENSMUSG00000009596	Taf7l	X	-	134460118	134476490	TATA-box binding protein associated factor 7 like [Source:MGI Symbol;Acc:MGI:1921719]	protein_coding	0	0	0	0	0	0	0	0.106814	0.423303	0.84463	0	0
ENSMUSG00000009614	Sardh	2	-	27188393	27248337	sarcosine dehydrogenase [Source:MGI Symbol;Acc:MGI:2183102]	protein_coding	0.181912	0.256266	0.240819	0	0	0	0	0.023633	0	0	0	0.050773
ENSMUSG00000009621	Vav2	2	-	27262104	27427033	vav 2 oncogene [Source:MGI Symbol;Acc:MGI:102718]	protein_coding	0.265221	0.099831	0.129987	0.363813	0.09012	0.504866	0.257704	0.370296	1.08905	0.364057	0.827413	0
ENSMUSG00000009628	Tex15	8	+	33516738	33585582	testis expressed gene 15 [Source:MGI Symbol;Acc:MGI:1934816]	protein_coding	5.11842	5.21282	3.34273	5.14275	4.17851	4.28593	2.65453	3.03897	1.98898	2.10617	5.93435	4.40112
ENSMUSG00000009630	Ppp2cb	8	+	33599625	33619441	protein phosphatase 2 (formerly 2A), catalytic subunit, beta isoform [Source:MGI Symbol;Acc:MGI:1321161]	protein_coding	154.532	136.077	131.852	177.225	165.923	168.538	45.8059	52.2994	39.7063	49.2348	50.6116	33.34
ENSMUSG00000009633	G0s2	1	-	193272161	193273217	G0/G1 switch gene 2 [Source:MGI Symbol;Acc:MGI:1316737]	protein_coding	204.567	258.219	264.524	136.26	117.743	140.924	37.9708	36.6665	26.5738	10.8363	9.67417	8.97997
ENSMUSG00000009640	Dmap1	4	-	117674681	117682273	DNA methyltransferase 1-associated protein 1 [Source:MGI Symbol;Acc:MGI:1913483]	protein_coding	8.59718	10.6398	9.6917	12.2283	4.72936	13.1401	10.4265	10.4691	6.87924	7.40469	8.05768	10.543
ENSMUSG00000009646	Pla2g12b	10	+	59403660	59421976	phospholipase A2, group XIIB [Source:MGI Symbol;Acc:MGI:1917086]	protein_coding	0	0	0	0	0	0.087108	0	0	0	0	0	0
ENSMUSG00000009647	Mcu	10	-	59446984	59616692	mitochondrial calcium uniporter [Source:MGI Symbol;Acc:MGI:3026965]	protein_coding	4.90245	3.51745	4.34219	8.59218	3.51328	4.96035	3.53317	3.44239	4.57887	0.616378	2.54564	1.90643
ENSMUSG00000009654	Oit3	10	-	59422958	59441778	oncoprotein induced transcript 3 [Source:MGI Symbol;Acc:MGI:1201782]	protein_coding	2.4603	1.47332	0.879995	1.16823	0.03868	0	0	0	0	0	0.097914	0
ENSMUSG00000009670	Tex11	X	-	100838648	101059667	testis expressed gene 11 [Source:MGI Symbol;Acc:MGI:1933237]	protein_coding	0.035113	0	0	0	0	0	0.235597	0.266041	0	0	0.639583	0.424752
ENSMUSG00000009681	Bcr	10	+	75060592	75184921	BCR activator of RhoGEF and GTPase [Source:MGI Symbol;Acc:MGI:88141]	protein_coding	1.37641	0.577963	0.350852	0.533887	0.798641	2.41642	0.828243	3.46327	3.63132	2.15352	0.664312	5.46816
ENSMUSG00000009687	Fxyd5	7	-	31032722	31042481	FXYD domain-containing ion transport regulator 5 [Source:MGI Symbol;Acc:MGI:1201785]	protein_coding	471.5	558.571	518.639	360.91	355.546	306.275	470.474	534.896	524.865	224.724	255.465	224.839
ENSMUSG00000009731	Kcnd1	X	+	7822289	7838280	potassium voltage-gated channel, Shal-related family, member 1 [Source:MGI Symbol;Acc:MGI:96671]	protein_coding	0.534066	0.799711	0.537765	0.179906	0.98035	1.32535	0.492556	0.695297	0.959776	0.426048	1.33278	0.44485
ENSMUSG00000009733	Tfcp2	15	-	100498012	100552008	transcription factor CP2 [Source:MGI Symbol;Acc:MGI:98509]	protein_coding	1.62067	0.769924	1.15665	0.23577	1.83113	0.986828	2.51427	2.30177	1.99352	2.16263	7.69592	3.86184
ENSMUSG00000009734	Pou6f2	13	-	18121098	18397686	POU domain, class 6, transcription factor 2 [Source:MGI Symbol;Acc:MGI:2443631]	protein_coding	2.13696	2.05663	1.48884	1.44996	1.83453	5.64876	3.09516	4.62715	4.07196	1.9344	1.79214	1.34677
ENSMUSG00000009739	Pou6f1	15	-	100575318	100599984	POU domain, class 6, transcription factor 1 [Source:MGI Symbol;Acc:MGI:102935]	protein_coding	0	0.027897	0.038065	0	0.018035	0	0	0.497032	0	0.199037	0	0
ENSMUSG00000009741	Ubp1	9	+	113930934	113977202	upstream binding protein 1 [Source:MGI Symbol;Acc:MGI:104889]	protein_coding	17.8033	17.7929	13.364	9.98006	9.98803	14.0427	13.2874	9.34137	14.2852	4.27469	7.55603	9.34888
ENSMUSG00000009772	Nuak2	1	+	132316126	132333488	NUAK family, SNF1-like kinase, 2 [Source:MGI Symbol;Acc:MGI:1921387]	protein_coding	9.24035	4.81002	5.85457	5.33851	8.39418	5.2977	5.42098	7.4638	4.74347	4.79958	2.74922	1.63022
ENSMUSG00000009828	Cilk1	9	+	78109192	78172107	ciliogenesis associated kinase 1 [Source:MGI Symbol;Acc:MGI:1934157]	protein_coding	6.21207	4.07808	6.17992	2.35136	2.54085	8.14601	2.66509	4.69879	4.54104	4.08468	1.52373	3.43115
ENSMUSG00000009863	Sdhb	4	+	140961203	140979193	succinate dehydrogenase complex, subunit B, iron sulfur (Ip) [Source:MGI Symbol;Acc:MGI:1914930]	protein_coding	123.508	124.212	122.025	124.613	137.646	139.383	63.7014	80.8592	68.7313	40.2871	42.7053	43.7944
ENSMUSG00000009876	Cox4i2	2	+	152754173	152765037	cytochrome c oxidase subunit 4I2 [Source:MGI Symbol;Acc:MGI:2135755]	protein_coding	0	0	0.329561	0	0.484874	0.29406	0.546066	0	0	0	0	0
ENSMUSG00000009894	Snap47	11	-	59407134	59451186	synaptosomal-associated protein, 47 [Source:MGI Symbol;Acc:MGI:1915076]	protein_coding	3.23183	3.39994	1.18594	8.94901	2.00623	1.18199	1.1126	1.05242	0.826517	2.03268	0	0.727408
ENSMUSG00000009900	Wnt3a	11	-	59248033	59290752	wingless-type MMTV integration site family, member 3A [Source:MGI Symbol;Acc:MGI:98956]	protein_coding	0	0	0	0	0	0	0	0.206824	0	0	0	0
ENSMUSG00000009905	Kdsr	1	-	106720459	106759727	3-ketodihydrosphingosine reductase [Source:MGI Symbol;Acc:MGI:1918000]	protein_coding	7.11421	4.50734	5.3417	7.8856	7.10549	6.36865	2.76197	2.65364	4.22692	2.94746	7.87711	2.96997
ENSMUSG00000009907	Vps4b	1	-	106764071	106796728	vacuolar protein sorting 4B [Source:MGI Symbol;Acc:MGI:1100499]	protein_coding	34.027	25.0189	25.7373	29.4595	23.4184	28.3605	16.79	13.7236	18.3493	19.3983	10.7834	16.2288
ENSMUSG00000009927	Rps25	9	+	44407139	44410427	ribosomal protein S25 [Source:MGI Symbol;Acc:MGI:1922867]	protein_coding	287.311	415.475	422.152	493.121	491.162	500.865	738.736	731.483	732.841	423.39	581.624	443.026
ENSMUSG00000009941	Nxf2	X	-	134944526	134964754	nuclear RNA export factor 2 [Source:MGI Symbol;Acc:MGI:1933192]	protein_coding	0	0.364857	0.294997	2.39832	0	1.07729	0	0	0	0	0	0
ENSMUSG00000009995	Taz	X	+	74281912	74290151	tafazzin [Source:MGI Symbol;Acc:MGI:109626]	protein_coding	25.3522	17.5518	15.0628	20.8924	13.8864	18.8497	13.9623	11.6145	9.8841	5.47466	10.3913	9.73861
ENSMUSG00000010021	Kif19a	11	+	114765388	114790739	kinesin family member 19A [Source:MGI Symbol;Acc:MGI:2447024]	protein_coding	0.229032	0.240442	0.308798	1.99388	0.04356	0.488701	0	0	0.260843	0	0	0
ENSMUSG00000010025	Aldh3a2	11	-	61223417	61267464	aldehyde dehydrogenase family 3, subfamily A2 [Source:MGI Symbol;Acc:MGI:1353452]	protein_coding	8.66513	4.52034	7.88461	7.26361	4.76164	5.83006	3.17829	3.88639	4.19215	0.434578	1.26692	0.902725
ENSMUSG00000010044	Zmynd10	9	+	107547298	107551319	zinc finger, MYND domain containing 10 [Source:MGI Symbol;Acc:MGI:2387863]	protein_coding	3.61944	3.23963	1.76651	3.81713	6.06184	1.75861	2.72796	0.693628	1.15846	1.43293	0	0.776069
ENSMUSG00000010045	Tmem115	9	+	107533945	107538673	transmembrane protein 115 [Source:MGI Symbol;Acc:MGI:1930765]	protein_coding	6.32066	5.09382	6.09982	8.99124	13.5043	17.0324	5.30291	5.57566	3.39955	6.97077	2.89755	0.541136
ENSMUSG00000010047	Hyal2	9	+	107567945	107572779	hyaluronoglucosaminidase 2 [Source:MGI Symbol;Acc:MGI:1196334]	protein_coding	2.33744	2.54631	2.68535	2.18361	2.52569	1.57682	0.72328	0.858866	1.10596	1.1298	1.16616	1.01431
ENSMUSG00000010048	Ifrd2	9	+	107587642	107593385	interferon-related developmental regulator 2 [Source:MGI Symbol;Acc:MGI:1316708]	protein_coding	2.73629	2.27136	2.56978	6.19044	8.39999	9.57961	2.22025	2.79991	2.77808	2.90937	3.00621	3.91041
ENSMUSG00000010051	Hyal1	9	+	107576927	107581710	hyaluronoglucosaminidase 1 [Source:MGI Symbol;Acc:MGI:96298]	protein_coding	0.971675	0.323436	0.66882	0.541285	1.9146	0.075685	1.3106	1.42439	1.07963	0.457928	0.11542	1.20532
ENSMUSG00000010054	Tusc2	9	+	107563255	107566112	tumor suppressor 2, mitochondrial calcium regulator [Source:MGI Symbol;Acc:MGI:1931086]	protein_coding	9.64183	6.78979	6.43872	9.53185	10.3132	13.8909	6.25976	6.14288	7.28813	2.31469	2.75102	4.53906
ENSMUSG00000010057	Nprl2	9	+	107542226	107545706	NPR2 like, GATOR1 complex subunit [Source:MGI Symbol;Acc:MGI:1914482]	protein_coding	12.0168	11.8596	9.09182	17.0818	11.4313	16.942	5.12113	6.70451	4.29806	3.96205	3.53892	5.71251
ENSMUSG00000010064	Slc38a3	9	-	107650634	107669530	solute carrier family 38, member 3 [Source:MGI Symbol;Acc:MGI:1923507]	protein_coding	0	0.428312	0.347405	0	0	0	0	0	0.226137	0	0	0
ENSMUSG00000010066	Cacna2d2	9	+	107399612	107529343	calcium channel, voltage-dependent, alpha 2/delta subunit 2 [Source:MGI Symbol;Acc:MGI:1929813]	protein_coding	0	0	0.03071	0	0.057197	0.104109	0.00907	0.253437	0.070678	0	0.582071	0
ENSMUSG00000010067	Rassf1	9	+	107551555	107562267	Ras association (RalGDS/AF-6) domain family member 1 [Source:MGI Symbol;Acc:MGI:1928386]	protein_coding	40.6877	36.5535	22.5355	31.9816	17.2725	33.1747	11.0306	5.89592	10.2602	3.25027	1.61159	0.268727
ENSMUSG00000010080	Epn3	11	-	94489599	94499974	epsin 3 [Source:MGI Symbol;Acc:MGI:1919139]	protein_coding	0	0	0	0	0	0	0	0	0.069588	0	0	0
ENSMUSG00000010086	Rnf112	11	-	61448442	61454131	ring finger protein 112 [Source:MGI Symbol;Acc:MGI:106611]	protein_coding	0	0	0.049227	0	0	0.320661	0.153216	0	0.147402	0	0	0
ENSMUSG00000010095	Slc3a2	19	-	8706882	8723369	solute carrier family 3 (activators of dibasic and neutral amino acid transport), member 2 [Source:MGI Symbol;Acc:MGI:96955]	protein_coding	71.3548	74.5836	57.4823	141.251	134.096	128.985	81.1959	103.348	60.3643	32.1636	39.0582	43.1874
ENSMUSG00000010097	Nxf1	19	+	8757073	8770922	nuclear RNA export factor 1 [Source:MGI Symbol;Acc:MGI:1858330]	protein_coding	20.4657	17.7706	19.226	21.8779	17.8746	21.4909	25.5819	32.9594	36.3636	50.2454	26.3607	59.6951
ENSMUSG00000010110	Stx5a	19	+	8741413	8756069	syntaxin 5A [Source:MGI Symbol;Acc:MGI:1928483]	protein_coding	34.6557	30.126	35.0894	40.3559	40.6783	28.0528	17.856	16.663	13.5049	16.1909	9.95842	3.09328
ENSMUSG00000010122	Slc47a1	11	-	61343401	61378345	solute carrier family 47, member 1 [Source:MGI Symbol;Acc:MGI:1914723]	protein_coding	0	0	0	0	0	0	0	0	0	0	0	0.285382
ENSMUSG00000010136	Pifo	3	-	105996957	106014646	primary cilia formation [Source:MGI Symbol;Acc:MGI:1923670]	protein_coding	0.482818	0	0.04755	0	0	0	0	0.283181	0	0	0	0
ENSMUSG00000010142	Tnfrsf13b	11	+	61126755	61149372	tumor necrosis factor receptor superfamily, member 13b [Source:MGI Symbol;Acc:MGI:1889411]	protein_coding	11.8655	7.37678	9.01351	10.6873	10.4068	8.02343	9.09507	11.7619	8.5281	14.3866	18.4909	7.28864
ENSMUSG00000010154	Spire2	8	+	123332713	123369515	spire type actin nucleation factor 2 [Source:MGI Symbol;Acc:MGI:2446256]	protein_coding	0.48527	0.396112	0.651955	0.174743	0.696587	0.534661	0.167649	0.490761	0.558754	0.184702	0.403465	1.32614
ENSMUSG00000010175	Prox1	1	-	190118035	190170714	prospero homeobox 1 [Source:MGI Symbol;Acc:MGI:97772]	protein_coding	0.348908	0.418072	0.272432	0.175166	0.833893	0.427153	0.041306	0.10437	0.173109	0.114725	0.178375	0.159788
ENSMUSG00000010205	Raver1	9	-	21074158	21092008	ribonucleoprotein, PTB-binding 1 [Source:MGI Symbol;Acc:MGI:1919016]	protein_coding	4.55907	4.13457	1.51236	4.51027	1.5063	2.50101	0.578521	0.452114	2.28681	0	0	0.277367
ENSMUSG00000010277	2610507B11Rik	11	+	78261752	78290623	RIKEN cDNA 2610507B11 gene [Source:MGI Symbol;Acc:MGI:1919753]	protein_coding	8.20262	7.26068	7.57775	7.78543	7.15678	8.90557	11.9119	15.7089	13.3068	15.0173	11.8272	14.8833
ENSMUSG00000010290	AI597479	1	+	43098710	43115947	expressed sequence AI597479 [Source:MGI Symbol;Acc:MGI:2138299]	protein_coding	3.86632	3.38135	2.16172	4.50267	4.96928	2.85513	1.96776	1.85888	2.90616	2.8439	2.2155	5.90361
ENSMUSG00000010307	Tmem86a	7	+	47050601	47054777	transmembrane protein 86A [Source:MGI Symbol;Acc:MGI:1915143]	protein_coding	13.5576	9.7524	11.3861	7.12508	3.53243	3.00539	6.71017	9.24583	6.79418	1.21084	2.58818	3.84117
ENSMUSG00000010311	Optc	1	-	133897199	133907999	opticin [Source:MGI Symbol;Acc:MGI:2151113]	protein_coding	0	0	0	0	0	0	0	0	0	0.190446	0	1.49525
ENSMUSG00000010342	Tex14	11	+	87405065	87555823	testis expressed gene 14 [Source:MGI Symbol;Acc:MGI:1933227]	protein_coding	3.14275	2.25567	1.35455	2.33097	3.46817	1.62948	3.87202	5.47047	4.82199	2.72525	3.45976	3.58768
ENSMUSG00000010358	Ifi35	11	+	101448407	101458698	interferon-induced protein 35 [Source:MGI Symbol;Acc:MGI:1917360]	protein_coding	28.9856	37.9162	28.3171	30.7203	28.7459	23.5144	14.4704	15.2712	9.36453	3.90025	9.46668	5.01882
ENSMUSG00000010362	Rdm1	11	+	101627195	101636100	RAD52 motif 1 [Source:MGI Symbol;Acc:MGI:1913849]	protein_coding	13.0645	6.5923	10.7461	7.14802	10.5458	10.6798	4.65648	8.38472	4.6983	5.59107	10.869	4.87292
ENSMUSG00000010376	Nedd8	14	-	55662263	55672124	neural precursor cell expressed, developmentally down-regulated gene 8 [Source:MGI Symbol;Acc:MGI:97301]	protein_coding	147.323	210.268	201.216	192.092	209.382	216.616	109.416	172.488	135.626	72.1042	84.2446	66.7471
ENSMUSG00000010392	Gosr1	11	-	76726602	76763579	golgi SNAP receptor complex member 1 [Source:MGI Symbol;Acc:MGI:1858260]	protein_coding	14.8512	11.1991	8.88022	10.7852	11.6623	13.1011	4.99628	4.74477	6.25098	3.12134	5.66436	2.6861
ENSMUSG00000010406	Mrpl52	14	+	54426909	54429756	mitochondrial ribosomal protein L52 [Source:MGI Symbol;Acc:MGI:1916086]	protein_coding	6.53322	13.1317	10.9763	10.93	15.0676	32.7923	21.9174	25.5027	25.4109	33.4654	13.9749	46.8716
ENSMUSG00000010435	Spaca7	8	+	12573029	12600744	sperm acrosome associated 7 [Source:MGI Symbol;Acc:MGI:1925884]	protein_coding	0	0	0	0	0	0	0	0	0.676643	0.35645	0	0
ENSMUSG00000010453	Kansl3	1	-	36335730	36369181	KAT8 regulatory NSL complex subunit 3 [Source:MGI Symbol;Acc:MGI:1918055]	protein_coding	7.28763	4.58631	7.40679	6.37395	11.3635	7.23778	7.84056	9.17463	8.58125	3.8607	5.93444	1.59387
ENSMUSG00000010461	Eya4	10	-	23102963	23350786	EYA transcriptional coactivator and phosphatase 4 [Source:MGI Symbol;Acc:MGI:1337104]	protein_coding	0.032946	0	0.034927	0	0.006852	0.016495	0.183327	0.310379	0.470224	0.733407	0.404043	0.378765
ENSMUSG00000010476	Ebf3	7	-	137193673	137314445	early B cell factor 3 [Source:MGI Symbol;Acc:MGI:894289]	protein_coding	0.038137	0.08095	0	0.024768	0	0.035368	0.051566	0.071412	0.1671	0	0.014352	0.120648
ENSMUSG00000010492	Uckl1os	2	+	181578480	181585170	uridine-cytidine kinase 1-like 1, opposite strand [Source:MGI Symbol;Acc:MGI:3801877]	antisense	0.074055	0.124927	0.300621	1.14775	0.13179	0	0.167865	0.086754	0.966242	0	0	0
ENSMUSG00000010505	Myt1	2	+	181763332	181827797	myelin transcription factor 1 [Source:MGI Symbol;Acc:MGI:1100535]	protein_coding	0	0	0	0	0	0	0	0.167081	0.085238	0	0.326024	0.628884
ENSMUSG00000010517	Faf1	4	+	109676588	109963960	Fas-associated factor 1 [Source:MGI Symbol;Acc:MGI:109419]	protein_coding	11.2254	8.76636	7.40574	8.41579	11.7798	13.8381	4.08716	6.15757	4.86584	3.73124	4.94906	1.31893
ENSMUSG00000010529	Gm266	12	-	111484609	111485823	predicted gene 266 [Source:MGI Symbol;Acc:MGI:2685112]	protein_coding	0	0	0	0	0	0	0.007938	0	0	0	0	0
ENSMUSG00000010538	Tsacc	3	-	88282757	88296999	TSSK6 activating co-chaperone [Source:MGI Symbol;Acc:MGI:1924177]	protein_coding	3.60024	3.00308	2.94575	1.91219	0.611215	10.3454	0.683028	0.51016	3.01359	1.3456	0.379062	0
ENSMUSG00000010554	Mettl16	11	+	74770830	74828525	methyltransferase like 16 [Source:MGI Symbol;Acc:MGI:1914743]	protein_coding	2.1073	1.16002	1.64516	3.52353	1.54829	4.55139	5.13022	2.5906	1.9959	4.05108	4.30154	3.02162
ENSMUSG00000010592	Dazl	17	-	50279395	50293636	deleted in azoospermia-like [Source:MGI Symbol;Acc:MGI:1342328]	protein_coding	0.022849	0	0	0	0	0	0.161814	0	0.108556	6.53362	0	1.06658
ENSMUSG00000010601	Apol7a	15	-	77388219	77399110	apolipoprotein L 7a [Source:MGI Symbol;Acc:MGI:1923011]	protein_coding	0	0	0	0	0	0	0	0	0	0	0	0
ENSMUSG00000010607	Pigyl	9	+	22156846	22158358	phosphatidylinositol glycan anchor biosynthesis, class Y-like [Source:MGI Symbol;Acc:MGI:1913518]	protein_coding	33.9941	41.1163	36.5672	55.7539	49.3363	63.6793	23.1509	26.8909	28.5135	22.7138	29.3254	24.6576
ENSMUSG00000010608	Rbm25	12	+	83631236	83683123	RNA binding motif protein 25 [Source:MGI Symbol;Acc:MGI:1914289]	protein_coding	57.3023	53.4033	56.1784	60.8074	45.4862	56.5683	145.792	138.266	153.374	128.496	116.557	136.552
ENSMUSG00000010609	Psen2	1	-	180227004	180263438	presenilin 2 [Source:MGI Symbol;Acc:MGI:109284]	protein_coding	13.3127	11.3343	14.4089	8.00283	12.4511	7.71859	17.6615	25.7557	19.5062	16.2729	12.7729	13.338
ENSMUSG00000010651	Acaa1b	9	-	119148023	119157093	acetyl-Coenzyme A acyltransferase 1B [Source:MGI Symbol;Acc:MGI:3605455]	protein_coding	4.22927	4.30201	5.64854	1.06294	1.65665	2.30374	3.06536	2.0125	3.14187	0.655063	0.696957	0.235211
ENSMUSG00000010660	Plcd1	9	-	119071527	119093502	phospholipase C, delta 1 [Source:MGI Symbol;Acc:MGI:97614]	protein_coding	0.169898	0.167881	0	0.752982	0	0	0.501914	0.169646	0.273848	0.221733	0	0
ENSMUSG00000010663	Fads1	19	+	10182888	10196877	fatty acid desaturase 1 [Source:MGI Symbol;Acc:MGI:1923517]	protein_coding	6.46894	5.85513	7.64654	6.51042	6.34625	7.17941	9.02497	12.5154	10.0137	6.54169	8.25371	6.7938
ENSMUSG00000010721	Lmbr1	5	-	29229802	29378390	limb region 1 [Source:MGI Symbol;Acc:MGI:1861746]	protein_coding	1.33712	1.49671	1.39957	2.30971	0.640562	0.822198	1.09772	0.623692	1.35129	1.18401	2.16555	0.999974
ENSMUSG00000010751	Tnfrsf22	7	-	143634806	143649661	tumor necrosis factor receptor superfamily, member 22 [Source:MGI Symbol;Acc:MGI:1930270]	protein_coding	2.25259	2.60656	1.78379	3.39693	4.29005	0.872193	0.650457	1.37668	2.33439	2.11556	2.12778	5.48095
ENSMUSG00000010755	Cars	7	-	143557230	143600090	cysteinyl-tRNA synthetase [Source:MGI Symbol;Acc:MGI:1351477]	protein_coding	13.5728	9.02134	9.90729	18.1971	14.6256	17.3944	29.1697	24.5009	29.9012	62.5852	44.8561	36.3554
ENSMUSG00000010760	Phlda2	7	-	143501545	143503150	pleckstrin homology like domain, family A, member 2 [Source:MGI Symbol;Acc:MGI:1202307]	protein_coding	0	0	0	0	0	0	0	0	0	0	0	0
ENSMUSG00000010796	Asz1	6	-	18050964	18109061	ankyrin repeat, SAM and basic leucine zipper domain containing 1 [Source:MGI Symbol;Acc:MGI:1921318]	protein_coding	2.72856	1.6584	2.31706	8.92323	8.41478	5.24543	0.319051	1.15486	1.14493	0	1.45333	2.25301
ENSMUSG00000010797	Wnt2	6	-	17988940	18030585	wingless-type MMTV integration site family, member 2 [Source:MGI Symbol;Acc:MGI:98954]	protein_coding	0	0	0	0	0	0	0	0	0	0	1.42975	0
ENSMUSG00000010803	Gabra1	11	-	42130939	42182930	gamma-aminobutyric acid (GABA) A receptor, subunit alpha 1 [Source:MGI Symbol;Acc:MGI:95613]	protein_coding	0	0	0	0	0.023819	0	0.367535	0.268258	0.759007	0	3.25562	5.49436
ENSMUSG00000010825	Grid2ip	5	+	143357338	143392152	glutamate receptor, ionotropic, delta 2 (Grid2) interacting protein 1 [Source:MGI Symbol;Acc:MGI:2176213]	protein_coding	0.012034	0	0	0	0.00306	0	0.047923	0.058658	0	0.231785	0.037447	1.18495
ENSMUSG00000010830	Kdelr3	15	+	79516411	79527739	KDEL (Lys-Asp-Glu-Leu) endoplasmic reticulum protein retention receptor 3 [Source:MGI Symbol;Acc:MGI:2145953]	protein_coding	6.30682	5.43288	6.7012	11.2803	10.7419	16.0405	3.03354	3.2739	6.37987	4.832	3.71208	2.76187
ENSMUSG00000010841	Cfap97d1	11	+	101984279	101992264	CFAP97 domain containing 1 [Source:MGI Symbol;Acc:MGI:1922687]	protein_coding	0	0.165813	0	0	0	0	0.339931	0.594875	0	0	0	0
ENSMUSG00000010911	Apip	2	+	103073675	103092644	APAF1 interacting protein [Source:MGI Symbol;Acc:MGI:1926788]	protein_coding	26.6445	30.4817	25.603	31.7519	32.1679	32.0948	17.1481	21.3301	21.5298	10.3226	38.3564	6.11464
ENSMUSG00000010914	Pdhx	2	-	103021075	103073513	pyruvate dehydrogenase complex, component X [Source:MGI Symbol;Acc:MGI:1351627]	protein_coding	10.9269	6.26539	5.02877	9.69587	12.933	8.48014	4.60915	3.81243	5.56495	4.7479	6.20283	3.70902
ENSMUSG00000010936	Vac14	8	+	110618585	110720398	Vac14 homolog (S. cerevisiae) [Source:MGI Symbol;Acc:MGI:2157980]	protein_coding	10.4869	9.12986	11.4705	23.9564	9.85911	16.873	15.9058	14.489	15.4685	6.07835	8.59968	5.30283
ENSMUSG00000011008	Mcoln2	3	+	146149833	146195513	mucolipin 2 [Source:MGI Symbol;Acc:MGI:1915529]	protein_coding	0	0	0	0	0	0	0	0	0.236915	0	0	0.778748
ENSMUSG00000011034	Slc5a1	5	+	33104219	33162870	solute carrier family 5 (sodium/glucose cotransporter), member 1 [Source:MGI Symbol;Acc:MGI:107678]	protein_coding	0	0	0	0	0	0	0	0	0.115528	0	0	0.028424
ENSMUSG00000011096	Akt1s1	7	+	44848991	44855421	AKT1 substrate 1 (proline-rich) [Source:MGI Symbol;Acc:MGI:1914855]	protein_coding	7.95921	4.18504	7.14031	5.34651	5.90656	7.58747	5.0857	6.39952	7.37038	4.58823	1.57764	3.98683
ENSMUSG00000011114	Tbrg1	9	-	37648763	37657312	transforming growth factor beta regulated gene 1 [Source:MGI Symbol;Acc:MGI:1100877]	protein_coding	123.419	139.905	135.414	201.66	178.697	147.008	108.133	150.447	124.534	73.5812	96.4862	80.2115
ENSMUSG00000011118	Panx3	9	-	37659902	37669235	pannexin 3 [Source:MGI Symbol;Acc:MGI:1918881]	protein_coding	0.031403	0	0	0	0	0	0.302185	0.233052	0.462747	0.097372	0.952984	0.934389
ENSMUSG00000011148	Adssl1	12	+	112620045	112641360	adenylosuccinate synthetase like 1 [Source:MGI Symbol;Acc:MGI:87947]	protein_coding	36.0786	26.4085	31.5986	42.7231	25.619	40.4194	14.1176	14.497	13.4656	3.42682	10.8643	5.57221
ENSMUSG00000011154	Cfap161	7	-	83774101	83794880	cilia and flagella associated protein 161 [Source:MGI Symbol;Acc:MGI:1922806]	protein_coding	0	0	0	0.16193	0	0	0.100801	0	0.507702	0	0	0
ENSMUSG00000011158	Brf1	12	-	112960085	113000704	BRF1, RNA polymerase III transcription initiation factor 90 kDa subunit [Source:MGI Symbol;Acc:MGI:1919558]	protein_coding	15.2497	10.9723	13.5481	11.3276	9.9729	14.6337	12.2462	14.9766	13.0657	10.4227	19.6175	9.98525
ENSMUSG00000011171	Vipr2	12	+	116077726	116146261	vasoactive intestinal peptide receptor 2 [Source:MGI Symbol;Acc:MGI:107166]	protein_coding	0	0	0	0	0	0	0	0	0	0	0	0
ENSMUSG00000011179	Odc1	12	+	17544794	17551505	ornithine decarboxylase, structural 1 [Source:MGI Symbol;Acc:MGI:97402]	protein_coding	14.8871	14.3956	12.1343	29.9784	29.4201	23.638	29.5362	24.5344	18.4042	7.66801	8.79105	5.98388
ENSMUSG00000011254	Thg1l	11	-	45946843	45955494	tRNA-histidine guanylyltransferase 1-like (S. cerevisiae) [Source:MGI Symbol;Acc:MGI:1913878]	protein_coding	1.3942	1.90686	0.540243	1.78651	2.60659	2.13533	1.85789	1.09155	1.58022	1.03516	0	3.33659
ENSMUSG00000011256	Adam19	11	+	46055992	46147343	a disintegrin and metallopeptidase domain 19 (meltrin beta) [Source:MGI Symbol;Acc:MGI:105377]	protein_coding	0.369108	0.825774	0.962769	0.64047	0.095565	0.968397	0.592661	0.773903	1.00289	1.16454	1.33999	0.54533
ENSMUSG00000011257	Pabpc4	4	+	123262351	123298925	poly(A) binding protein, cytoplasmic 4 [Source:MGI Symbol;Acc:MGI:2385206]	protein_coding	10.2639	10.7385	9.73104	13.0025	16.4469	12.3183	15.044	12.6309	14.9723	13.3234	19.7704	25.4466
ENSMUSG00000011263	Exoc3l2	7	+	19463331	19496762	exocyst complex component 3-like 2 [Source:MGI Symbol;Acc:MGI:1921713]	protein_coding	0.18017	0.557814	0.180962	0.664126	0.143383	0.400507	0.144098	0.824029	0.867204	0.182253	0.071392	0.849409
ENSMUSG00000011267	Zfp296	7	+	19577287	19580656	zinc finger protein 296 [Source:MGI Symbol;Acc:MGI:1926956]	protein_coding	2.95794	3.98214	3.18468	8.82584	5.88212	6.97739	1.09646	2.43614	1.88014	2.34	0	1.63067
ENSMUSG00000011305	Plin5	17	-	56111601	56117596	perilipin 5 [Source:MGI Symbol;Acc:MGI:1914218]	protein_coding	0	0.37518	0.211725	0	0.172202	0	0	0	0	0	0	0
ENSMUSG00000011306	Sugp1	8	+	70042813	70072347	SURP and G patch domain containing 1 [Source:MGI Symbol;Acc:MGI:1917866]	protein_coding	15.7917	10.4842	9.49253	13.183	10.6135	6.61939	13.3393	14.9606	10.712	4.9647	11.261	5.03306
ENSMUSG00000011349	Dmrtc2	7	+	24870057	24877651	doublesex and mab-3 related transcription factor like family C2 [Source:MGI Symbol;Acc:MGI:1918491]	protein_coding	17.9635	21.4261	19.0954	33.6846	29.9177	25.3753	5.98545	6.75193	7.01438	3.2049	5.05983	1.31092
ENSMUSG00000011350	Gm5893	7	+	24818795	24840275	predicted gene 5893 [Source:MGI Symbol;Acc:MGI:3645761]	processed_transcript	0.051202	0.064133	0	0	0	0	0.040962	0	0	0	0	0
ENSMUSG00000011382	Dhdh	7	-	45470987	45488805	dihydrodiol dehydrogenase (dimeric) [Source:MGI Symbol;Acc:MGI:1919005]	protein_coding	2.6873	1.62658	1.91407	1.24196	1.58709	1.92749	2.52558	3.20184	1.75366	1.79515	1.42686	2.60754
ENSMUSG00000011427	Zfp790	7	+	29816114	29831005	zinc finger protein 790 [Source:MGI Symbol;Acc:MGI:1923431]	protein_coding	3.34208	1.73336	1.26838	1.34879	0.506655	1.57096	1.39551	0.587692	0.258963	0.262898	0.089949	0
ENSMUSG00000011463	Cpb1	3	-	20248264	20275733	carboxypeptidase B1 (tissue) [Source:MGI Symbol;Acc:MGI:1923953]	protein_coding	0	0	0	0	0	0	1.03415	0.262156	0.865167	0.417502	1.83838	4.99252
ENSMUSG00000011486	Slc25a41	17	-	57032773	57041654	solute carrier family 25, member 41 [Source:MGI Symbol;Acc:MGI:2144215]	protein_coding	0	0	0.077785	0.058199	0	0	0	0	0	0	0	0
ENSMUSG00000011589	Fsd1	17	+	55986509	55996881	fibronectin type 3 and SPRY domain-containing protein [Source:MGI Symbol;Acc:MGI:1934858]	protein_coding	0.034355	0	0	0.05045	0	0	0	0.352702	0.036443	0.340821	0	0.599552
ENSMUSG00000011632	Pinlyp	7	-	24541658	24546118	phospholipase A2 inhibitor and LY6/PLAUR domain containing [Source:MGI Symbol;Acc:MGI:3615324]	protein_coding	0	0	0	0	0.275825	0	0	0	0	0	1.85423	0
ENSMUSG00000011658	Fuz	7	+	44896079	44902631	fuzzy planar cell polarity protein [Source:MGI Symbol;Acc:MGI:1917550]	protein_coding	2.43221	1.63124	2.6017	6.11588	0.633266	5.42789	2.13823	1.49726	1.06715	1.56122	0.43933	1.29052
ENSMUSG00000011751	Sptbn4	7	-	27356383	27447686	spectrin beta, non-erythrocytic 4 [Source:MGI Symbol;Acc:MGI:1890574]	protein_coding	0.138957	0.071172	0.266016	0.005827	0.116519	0.047125	0.118063	0.067761	0	0	0.08683	0.220053
ENSMUSG00000011752	Pgam1	19	+	41911923	41918660	phosphoglycerate mutase 1 [Source:MGI Symbol;Acc:MGI:97552]	protein_coding	183.088	164.672	147.114	194.4	157.343	144.965	19.265	20.7995	17.9473	2.92461	10.7643	6.53503
ENSMUSG00000011831	Evi5	5	-	107744795	107875107	ecotropic viral integration site 5 [Source:MGI Symbol;Acc:MGI:104736]	protein_coding	11.9156	7.89727	9.22141	9.01585	10.416	6.73442	12.9384	8.35295	6.25939	7.04196	2.40139	3.7941
ENSMUSG00000011832	Evi5l	8	+	4166567	4211257	ecotropic viral integration site 5 like [Source:MGI Symbol;Acc:MGI:2442167]	protein_coding	2.64406	2.17681	4.34895	6.42192	5.59437	4.58148	1.6471	1.73746	1.50905	2.21045	1.51264	0
ENSMUSG00000011837	Snapc2	8	+	4253080	4256220	small nuclear RNA activating complex, polypeptide 2 [Source:MGI Symbol;Acc:MGI:1914861]	protein_coding	20.3825	16.3307	17.6142	25.241	19.6709	25.9707	13.1353	10.1662	11.6604	8.38518	12.4263	7.86302
ENSMUSG00000011877	Git1	11	+	77493562	77507786	GIT ArfGAP 1 [Source:MGI Symbol;Acc:MGI:1927140]	protein_coding	6.16022	4.45569	5.83331	4.29591	6.56134	5.21599	6.54284	5.98486	6.94107	4.82568	6.65301	8.03565
ENSMUSG00000011884	Gltp	5	-	114669398	114690984	glycolipid transfer protein [Source:MGI Symbol;Acc:MGI:1929253]	protein_coding	165.492	188.858	108.813	140.949	127.221	104.586	66.454	65.1178	58.8479	37.5973	36.2782	39.9437
ENSMUSG00000011958	Bnip2	9	+	69989466	70008317	BCL2/adenovirus E1B interacting protein 2 [Source:MGI Symbol;Acc:MGI:109327]	protein_coding	52.5587	47.5508	48.2501	38.5759	48.2685	47.2592	33.7917	32.8579	33.0572	16.8114	25.9743	20.2774
ENSMUSG00000011960	Ccnt1	15	-	98538689	98570923	cyclin T1 [Source:MGI Symbol;Acc:MGI:1328363]	protein_coding	17.9362	15.1649	15.206	11.1113	11.3243	11.313	16.3764	16.9937	15.905	9.37317	9.1452	17.6478
ENSMUSG00000012017	Scarf2	16	+	17797282	17808293	scavenger receptor class F, member 2 [Source:MGI Symbol;Acc:MGI:1858430]	protein_coding	0	0	0.076366	0	0.197274	0	0.138098	0	0.218173	0.298836	0.749866	0
ENSMUSG00000012042	4930579F01Rik	3	-	138164078	138239663	RIKEN cDNA 4930579F01 gene [Source:MGI Symbol;Acc:MGI:1914991]	protein_coding	0	0	0	0	0	0	0	0	0.847653	0	0	0.793595
ENSMUSG00000012076	Brms1l	12	+	55836324	55869736	breast cancer metastasis-suppressor 1-like [Source:MGI Symbol;Acc:MGI:1196337]	protein_coding	4.77578	2.34171	3.08915	3.70117	5.98785	8.08391	4.80789	2.35919	3.25915	3.15972	5.46703	2.92829
ENSMUSG00000012114	Med15	16	-	17651208	17732891	mediator complex subunit 15 [Source:MGI Symbol;Acc:MGI:2137379]	protein_coding	14.7116	12.7117	11.6035	14.425	13.4516	15.5251	14.8223	15.6898	15.4617	10.8211	12.338	7.46208
ENSMUSG00000012117	Dhdds	4	-	133969028	134000918	dehydrodolichyl diphosphate synthase [Source:MGI Symbol;Acc:MGI:1914672]	protein_coding	14.4557	12.0195	10.8609	12.3955	18.8607	12.816	8.84992	10.1258	9.75587	7.41355	10.0915	7.90781
ENSMUSG00000012123	Crybg2	4	+	134060815	134092504	crystallin beta-gamma domain containing 2 [Source:MGI Symbol;Acc:MGI:1334463]	protein_coding	0.137132	0.266797	0.340477	0	0.571469	1.40716	0.497871	0.388289	0.149548	0	0	0
ENSMUSG00000012126	Ubxn11	4	+	134102570	134127593	UBX domain protein 11 [Source:MGI Symbol;Acc:MGI:1914836]	protein_coding	16.0292	11.9614	24.526	13.3039	10.0655	12.0863	24.976	15.0461	15.2005	15.0394	4.91596	7.36013
ENSMUSG00000012187	Mogat1	1	+	78510991	78538173	monoacylglycerol O-acyltransferase 1 [Source:MGI Symbol;Acc:MGI:1915643]	protein_coding	0	0	0	0	0	0.059695	0	0	0	0	0	0
ENSMUSG00000012211	Tex22	12	+	113074502	113088917	testis expressed gene 22 [Source:MGI Symbol;Acc:MGI:1922921]	protein_coding	0	0	0	0	0	0	0	0	0	0	0	0
ENSMUSG00000012282	Wnt8a	18	+	34542313	34548273	wingless-type MMTV integration site family, member 8A [Source:MGI Symbol;Acc:MGI:107924]	protein_coding	0	0	0	0	0	0	0	0.089724	0	0	0.155524	0.428897
ENSMUSG00000012296	Tjap1	17	-	46257851	46283026	tight junction associated protein 1 [Source:MGI Symbol;Acc:MGI:1921344]	protein_coding	5.50865	4.33899	3.93626	8.77707	8.71613	2.98441	3.33233	2.97123	3.96899	0.645735	2.47042	5.86075
ENSMUSG00000012350	Ehf	2	-	103263433	103303278	ets homologous factor [Source:MGI Symbol;Acc:MGI:1270840]	protein_coding	0	0	0	0	0	0	0	0.022454	0	0	0.119673	3.17113
ENSMUSG00000012396	Nanog	6	+	122707489	122714633	Nanog homeobox [Source:MGI Symbol;Acc:MGI:1919200]	protein_coding	0	0	0	0	0	0	0	0.143993	0	0	0.493758	0.725894
ENSMUSG00000012405	Rpl15	14	-	18267823	18271391	ribosomal protein L15 [Source:MGI Symbol;Acc:MGI:1913730]	protein_coding	226.075	300.794	279.564	412.723	384.919	334.399	137.377	182.029	141.735	44.3299	63.6453	36.7983
ENSMUSG00000012422	Tmem167	13	+	90089123	90143907	transmembrane protein 167 [Source:MGI Symbol;Acc:MGI:1913324]	protein_coding	21.3143	25.4189	21.7627	28.7579	24.6974	24.3208	12.0583	11.6692	11.5614	12.5687	11.3386	9.37336
ENSMUSG00000012428	Steap4	5	+	7960457	7982213	STEAP family member 4 [Source:MGI Symbol;Acc:MGI:1923560]	protein_coding	0.074736	0.542324	0.261565	0	0.715548	0	0.242379	0	0	0.244129	0	0
ENSMUSG00000012429	Mplkip	13	+	17695192	17699748	M-phase specific PLK1 intereacting protein [Source:MGI Symbol;Acc:MGI:1913558]	protein_coding	15.5197	21.6382	15.5806	31.7706	30.19	28.4104	6.31385	7.93537	5.8143	4.9056	4.43391	1.06589
ENSMUSG00000012443	Kif11	19	+	37376403	37421859	kinesin family member 11 [Source:MGI Symbol;Acc:MGI:1098231]	protein_coding	8.76618	7.13324	6.32587	8.79054	3.9175	4.89704	10.8047	10.7523	10.836	14.6062	12.5598	16.4653
ENSMUSG00000012483	Rpa3	6	-	8255936	8259173	replication protein A3 [Source:MGI Symbol;Acc:MGI:1915490]	protein_coding	49.4275	57.7555	48.1174	79.8115	76.8055	95.8509	41.7329	22.0887	27.369	23.3809	31.1586	27.7684
ENSMUSG00000012519	Mlkl	8	-	111311797	111338177	mixed lineage kinase domain-like [Source:MGI Symbol;Acc:MGI:1921818]	protein_coding	10.1355	4.91057	5.28154	4.87458	10.9953	10.1516	5.78615	6.8543	4.73191	1.83481	6.68694	6.90818
ENSMUSG00000012520	Phox2b	5	-	67094399	67099301	paired-like homeobox 2b [Source:MGI Symbol;Acc:MGI:1100882]	protein_coding	0	0	0	0	0.101734	0	0	0.612415	0.036244	0	0	0
ENSMUSG00000012535	Tnpo3	6	-	29540827	29609887	transportin 3 [Source:MGI Symbol;Acc:MGI:1196412]	protein_coding	12.1547	9.1319	8.86832	11.5609	10.1451	9.9493	20.3021	20.3235	43.569	22.3342	19.0634	30.443
ENSMUSG00000012609	Ttll5	12	+	85824659	86061893	tubulin tyrosine ligase-like family, member 5 [Source:MGI Symbol;Acc:MGI:2443657]	protein_coding	1.56442	1.75503	1.43601	0.995328	0.879654	0.649459	3.23925	6.73682	5.26613	1.03341	3.02521	1.52026
ENSMUSG00000012640	Zfp715	7	-	43296197	43313294	zinc finger protein 715 [Source:MGI Symbol;Acc:MGI:1917180]	protein_coding	9.63817	6.63356	6.23893	6.23041	6.24914	3.41833	2.53843	1.61246	2.84431	2.13436	0.942738	4.98351
ENSMUSG00000012705	Retn	8	+	3655770	3660110	resistin [Source:MGI Symbol;Acc:MGI:1888506]	protein_coding	4.59811	6.63994	5.49988	3.48927	2.97832	2.99574	13.1121	15.0149	11.8273	11.325	7.98465	10.5207
ENSMUSG00000012777	Acp4	7	-	44252148	44257378	acid phosphatase 4 [Source:MGI Symbol;Acc:MGI:3644563]	protein_coding	0	0.135017	0.080439	0	0	0	0.128213	0.656919	2.69558	0.730739	0	1.21511
ENSMUSG00000012819	Cdh23	10	-	60302748	60696490	cadherin 23 (otocadherin) [Source:MGI Symbol;Acc:MGI:1890219]	protein_coding	0.570324	0.494117	0.39722	0.1067	0.912854	0.350757	0.041723	0.232358	0.157709	0.436449	0.200817	0.069862
ENSMUSG00000012848	Rps5	7	+	12922290	12926686	ribosomal protein S5 [Source:MGI Symbol;Acc:MGI:1097682]	protein_coding	1076.54	1191.65	1579.37	1518.91	1399.08	1579.12	1054.79	1230.26	1063.26	1184.93	1114.97	1043.37
ENSMUSG00000012889	Podnl1	8	+	84125989	84132527	podocan-like 1 [Source:MGI Symbol;Acc:MGI:2685352]	protein_coding	0	0	0	0	0	0	0	0	0	0	0	0
ENSMUSG00000013033	Adgrl1	8	+	83900105	83941954	adhesion G protein-coupled receptor L1 [Source:MGI Symbol;Acc:MGI:1929461]	protein_coding	0	0	0.011149	0	0.258314	0.063049	0.320663	0.739422	0.389553	0.991589	0.394095	2.17455
ENSMUSG00000013076	Amotl1	9	-	14541966	14645056	angiomotin-like 1 [Source:MGI Symbol;Acc:MGI:1922973]	protein_coding	0.413966	0.350746	0.534776	0.234985	0.171622	0.008948	0.424724	0.508902	0.35377	0.62316	0.329175	0.471382
ENSMUSG00000013083	2200002J24Rik	7	+	30698926	30700536	RIKEN cDNA 2200002J24 gene [Source:MGI Symbol;Acc:MGI:1916397]	protein_coding	0.509322	0.122943	0.297111	0.913818	0.337296	0	1.60515	0.557161	1.40371	0	0	0
ENSMUSG00000013089	Etv5	16	-	22381309	22439719	ets variant 5 [Source:MGI Symbol;Acc:MGI:1096867]	protein_coding	0	0	0.03746	0.034503	0.553727	0.060491	0	0	0.099818	0	0	0
ENSMUSG00000013091	Tmem190	7	+	4782937	4784341	transmembrane protein 190 [Source:MGI Symbol;Acc:MGI:1925302]	protein_coding	0	0	0.005442	0	0	0	0	0	0	0	0	0
ENSMUSG00000013150	Gfod2	8	-	105713854	105758664	glucose-fructose oxidoreductase domain containing 2 [Source:MGI Symbol;Acc:MGI:1917825]	protein_coding	0.668556	0.508692	0.600137	0.883695	2.49982	1.72539	1.15782	1.57755	1.62518	1.659	1.47532	0.940769
ENSMUSG00000013155	Enkd1	8	-	105703651	105708210	enkurin domain containing 1 [Source:MGI Symbol;Acc:MGI:2142593]	protein_coding	2.53885	1.39089	2.04756	4.65996	2.27877	0	7.21536	7.79446	7.80706	3.6836	1.33156	6.14467
ENSMUSG00000013158	4933405L10Rik	8	+	105707655	105710246	RIKEN cDNA 4933405L10 gene [Source:MGI Symbol;Acc:MGI:1918296]	protein_coding	0	0	0	0	0.875604	0	0	0	0	0	0	0
ENSMUSG00000013160	Atp6v0d1	8	-	105524465	105566047	ATPase, H+ transporting, lysosomal V0 subunit D1 [Source:MGI Symbol;Acc:MGI:1201778]	protein_coding	78.898	79.8179	80.2118	62.1849	74.0454	88.0341	66.517	74.6322	62.0653	54.8202	43.8475	48.0191
ENSMUSG00000013236	Ptprs	17	-	56412426	56476483	protein tyrosine phosphatase, receptor type, S [Source:MGI Symbol;Acc:MGI:97815]	protein_coding	13.2669	12.7742	12.3384	8.96613	8.16429	6.01692	2.52514	2.594	3.30778	0.917683	1.65094	2.24227
ENSMUSG00000013275	Slc41a1	1	+	131827493	131848865	solute carrier family 41, member 1 [Source:MGI Symbol;Acc:MGI:2444823]	protein_coding	1.10038	0.798805	0.716551	0.290102	0.898391	0.928042	0.996795	1.44642	1.12257	1.24391	1.09932	0.447851
ENSMUSG00000013338	Fer1l4	2	-	156019139	156052947	fer-1-like 4 (C. elegans) [Source:MGI Symbol;Acc:MGI:1921812]	protein_coding	0	0	0	0	0	0	0	0	0	0	0	0
ENSMUSG00000013353	4931406B18Rik	7	-	43492044	43505940	RIKEN cDNA 4931406B18 gene [Source:MGI Symbol;Acc:MGI:1921304]	protein_coding	0.011938	0.028294	0	0	0.019413	0	0	0	0	0	0.094932	0
ENSMUSG00000013367	Iglon5	7	-	43472904	43490075	IgLON family member 5 [Source:MGI Symbol;Acc:MGI:2686277]	protein_coding	0	0	0	0	0.015114	0	0	0.072688	0	0	0.108821	0
ENSMUSG00000013415	Igf2bp1	11	-	95957163	96005940	insulin-like growth factor 2 mRNA binding protein 1 [Source:MGI Symbol;Acc:MGI:1890357]	protein_coding	0.008187	0.034084	0.030712	0.210246	0.004835	0.045169	0.412636	0.287029	0.569829	0.815895	0.542491	1.07597
ENSMUSG00000013418	B4galnt2	11	-	95865943	95914891	beta-1,4-N-acetyl-galactosaminyl transferase 2 [Source:MGI Symbol;Acc:MGI:1342058]	protein_coding	0	0	0	0	0.032677	0	0	0	0	0	0	0
ENSMUSG00000013419	Zfp651	9	+	121759330	121771742	zinc finger protein 651 [Source:MGI Symbol;Acc:MGI:2670992]	protein_coding	0	0	0	0	0.219429	0.032802	0.08762	0.10274	0.17175	0	0	0
ENSMUSG00000013465	Nelfb	2	-	25199712	25211489	negative elongation factor complex member B [Source:MGI Symbol;Acc:MGI:1931035]	protein_coding	17.2139	12.5041	15.9255	23.1875	15.0696	15.7348	14.2554	11.9711	11.9384	7.28219	9.28713	7.39915
ENSMUSG00000013483	Card14	11	+	119307768	119345375	caspase recruitment domain family, member 14 [Source:MGI Symbol;Acc:MGI:2386258]	protein_coding	0	0	0	0	0	0	0	0	0	0	0	0
ENSMUSG00000013495	Tmem175	5	+	108629770	108648782	transmembrane protein 175 [Source:MGI Symbol;Acc:MGI:1919642]	protein_coding	11.7857	9.98503	7.37316	8.88695	6.73299	7.41648	5.40379	6.75979	6.34307	1.82865	1.15158	0.990923
ENSMUSG00000013523	Bcas1	2	-	170346991	170427845	breast carcinoma amplified sequence 1 [Source:MGI Symbol;Acc:MGI:1924210]	protein_coding	0.546068	0.178211	0	0	0	0	0	0.227924	0.504648	0.346447	0.113934	0.562168
ENSMUSG00000013539	Tango2	16	-	18300825	18348103	transport and golgi organization 2 [Source:MGI Symbol;Acc:MGI:101825]	protein_coding	27.5034	21.9417	18.9633	15.1603	27.4957	12.7455	8.16864	8.95138	9.95948	3.94448	2.29284	7.98321
ENSMUSG00000013562	4833413E03Rik	17	+	31557126	31559113	RIKEN cDNA 4833413E03 gene [Source:MGI Symbol;Acc:MGI:1925354]	lincRNA	1.13293	0.232911	0.357042	0.613954	0.476293	1.12556	0.188066	0.683122	0	0	0	0
ENSMUSG00000013584	Aldh1a2	9	+	71215789	71296243	aldehyde dehydrogenase family 1, subfamily A2 [Source:MGI Symbol;Acc:MGI:107928]	protein_coding	0	0	0	0	0	0	0	0.156247	0	0	0.232576	0
ENSMUSG00000013593	Ndufs2	1	-	171234853	171251388	NADH:ubiquinone oxidoreductase core subunit S2 [Source:MGI Symbol;Acc:MGI:2385112]	protein_coding	34.6833	23.0182	33.4169	29.3461	39.2954	43.0482	40.2754	35.8745	39.5912	46.065	55.2841	71.5022
ENSMUSG00000013611	Snx31	15	-	36504062	36555573	sorting nexin 31 [Source:MGI Symbol;Acc:MGI:1913946]	protein_coding	2.87451	3.67232	2.04919	2.83401	3.42083	1.5592	0.799574	0.350251	2.3777	1.40583	0.645745	0
ENSMUSG00000013622	Atraid	5	+	31048312	31054623	all-trans retinoic acid induced differentiation factor [Source:MGI Symbol;Acc:MGI:1918918]	protein_coding	78.4338	80.1995	66.2709	70.1692	66.9091	72.3906	37.1474	31.5134	28.2954	29.8628	55.0235	18.2155
ENSMUSG00000013629	Cad	5	+	31054780	31078479	carbamoyl-phosphate synthetase 2, aspartate transcarbamylase, and dihydroorotase [Source:MGI Symbol;Acc:MGI:1916969]	protein_coding	1.20451	1.14678	1.47198	3.1353	4.37397	3.63153	1.62748	2.09183	1.60649	1.0949	1.29445	1.50767
ENSMUSG00000013643	Lypd8	11	+	58379043	58390728	LY6/PLAUR domain containing 8 [Source:MGI Symbol;Acc:MGI:1917413]	protein_coding	0	0	0	0	0	0	0	0	0	0	0	0
ENSMUSG00000013646	Sh3bp5l	11	+	58330724	58347728	SH3 binding domain protein 5 like [Source:MGI Symbol;Acc:MGI:1933124]	protein_coding	5.48489	4.37636	6.03186	6.85478	4.67743	5.30515	2.44528	3.28648	4.61232	2.17171	4.12105	2.07027
ENSMUSG00000013653	1810065E05Rik	11	+	58421111	58426024	RIKEN cDNA 1810065E05 gene [Source:MGI Symbol;Acc:MGI:1917114]	protein_coding	0	0	0	0	0	0	0	0	0	0	0	0
ENSMUSG00000013662	Atad1	19	-	32671638	32739786	ATPase family, AAA domain containing 1 [Source:MGI Symbol;Acc:MGI:1915229]	protein_coding	21.1033	16.8554	13.2948	18.3446	24.3955	13.2252	5.84202	5.11328	6.8246	5.19749	4.71876	4.54393
ENSMUSG00000013663	Pten	19	+	32757497	32826160	phosphatase and tensin homolog [Source:MGI Symbol;Acc:MGI:109583]	protein_coding	26.0573	22.0593	17.2266	12.6406	13.5473	21.1824	13.9536	15.7658	14.3316	11.2007	10.4456	6.51223
ENSMUSG00000013668	4933402N03Rik	7	-	131137713	131146314	RIKEN cDNA 4933402N03 gene [Source:MGI Symbol;Acc:MGI:1914681]	protein_coding	0.021925	0	0	0	0	0	0	0	0	0	0.36536	0
ENSMUSG00000013698	Pea15a	1	-	172196728	172206804	phosphoprotein enriched in astrocytes 15A [Source:MGI Symbol;Acc:MGI:104799]	protein_coding	12.5984	10.5584	7.47235	7.204	14.3045	6.63282	4.78491	5.75635	6.98672	1.64701	5.12728	3.71794
ENSMUSG00000013701	Timm23	14	-	32180162	32201898	translocase of inner mitochondrial membrane 23 [Source:MGI Symbol;Acc:MGI:1858317]	protein_coding	108.978	111.055	92.6276	188.61	185.971	180.605	19.6162	29.338	20.4862	7.74343	10.2273	8.78029
ENSMUSG00000013707	Tnfaip8l2	3	-	95139521	95142360	tumor necrosis factor, alpha-induced protein 8-like 2 [Source:MGI Symbol;Acc:MGI:1917019]	protein_coding	62.6197	76.7583	73.2877	61.6385	73.2753	62.269	50.9284	44.4357	44.8852	14.8167	33.1997	23.593
ENSMUSG00000013736	Trnt1	6	+	106769120	106782474	tRNA nucleotidyl transferase, CCA-adding, 1 [Source:MGI Symbol;Acc:MGI:1917297]	protein_coding	30.8293	24.0294	19.8006	25.602	23.9707	19.3182	14.7582	11.8739	14.1578	8.77064	16.8292	5.41244
ENSMUSG00000013766	Ly6g6e	17	+	35076902	35078804	lymphocyte antigen 6 complex, locus G6E [Source:MGI Symbol;Acc:MGI:1917524]	protein_coding	0	0	0	0	0	0.166687	0.211746	0.722556	0	1.48802	0	8.34825
ENSMUSG00000013787	Ehmt2	17	+	34898469	34914052	euchromatic histone lysine N-methyltransferase 2 [Source:MGI Symbol;Acc:MGI:2148922]	protein_coding	9.90845	16.5285	14.2599	13.7264	13.657	17.6051	25.1282	33.8744	20.811	11.8674	30.0067	50.026
ENSMUSG00000013822	Elof1	9	-	22112989	22117172	ELF1 homolog, elongation factor 1 [Source:MGI Symbol;Acc:MGI:1913376]	protein_coding	78.8978	84.4581	74.5499	85.7938	87.0249	61.0417	37.5001	41.1092	35.9025	18.3627	31.7452	12.2151
ENSMUSG00000013833	Med16	10	-	79894708	79908923	mediator complex subunit 16 [Source:MGI Symbol;Acc:MGI:2158394]	protein_coding	6.29727	4.98813	5.24502	10.8	9.14312	9.70735	7.86287	6.35319	6.4179	6.21082	7.71492	3.05272
ENSMUSG00000013846	St3gal1	15	-	67102875	67176830	ST3 beta-galactoside alpha-2,3-sialyltransferase 1 [Source:MGI Symbol;Acc:MGI:98304]	protein_coding	5.5595	6.02713	5.96767	3.20562	1.49047	2.84127	4.77745	4.47259	4.26031	2.21356	2.52472	3.35515
ENSMUSG00000013858	Tmem259	10	-	79974948	79984330	transmembrane protein 259 [Source:MGI Symbol;Acc:MGI:2177957]	protein_coding	9.47213	10.9477	12.869	15.0955	10.5194	15.8714	17.6506	16.7978	18.8128	19.6899	16.7123	12.8642
ENSMUSG00000013878	Rnf170	8	+	26119368	26151790	ring finger protein 170 [Source:MGI Symbol;Acc:MGI:1924983]	protein_coding	12.7947	10.0762	9.29911	9.89311	10.7986	4.83051	5.89069	7.60984	4.82165	11.5498	9.89853	6.63818
ENSMUSG00000013921	Clip3	7	+	30291728	30308367	CAP-GLY domain containing linker protein 3 [Source:MGI Symbol;Acc:MGI:1923936]	protein_coding	0	0	0	0	0	0.275862	0	0.533179	0.725544	0	0	0
ENSMUSG00000013928	Thap8	7	+	30280094	30290237	THAP domain containing 8 [Source:MGI Symbol;Acc:MGI:1922879]	protein_coding	0.074691	0	0	0.517732	0	0	0.271972	0.263448	0.120206	0.426597	1.44424	0.289251
ENSMUSG00000013936	Myl2	5	+	122100951	122113472	myosin, light polypeptide 2, regulatory, cardiac, slow [Source:MGI Symbol;Acc:MGI:97272]	protein_coding	0.052277	0	10.349	0	0	0	0.517566	0	0	0	0	0
ENSMUSG00000013973	Dedd	1	+	171329145	171342331	death effector domain-containing [Source:MGI Symbol;Acc:MGI:1333874]	protein_coding	13.5495	9.52507	9.8974	15.0456	15.045	23.9468	0.930235	2.68194	3.19648	1.35427	0.40004	1.691
ENSMUSG00000013974	Mcemp1	8	+	3665754	3669259	mast cell expressed membrane protein 1 [Source:MGI Symbol;Acc:MGI:1916439]	protein_coding	597.79	654.049	633.555	401.823	395.251	394.482	330.647	373.81	343.881	201.673	232.738	172.963
ENSMUSG00000013997	Nit1	1	-	171338008	171345646	nitrilase 1 [Source:MGI Symbol;Acc:MGI:1350916]	protein_coding	12.3073	13.118	16.7244	7.23436	10.1262	11.2196	7.94151	8.2824	8.73213	5.02262	6.46853	6.17682
ENSMUSG00000014030	Pax5	4	-	44524757	44710487	paired box 5 [Source:MGI Symbol;Acc:MGI:97489]	protein_coding	0	0	0.001529	0	0	0	0.079876	0	0.155424	0.240663	0.196325	0.480492
ENSMUSG00000014039	Prdm15	16	-	97791467	97851850	PR domain containing 15 [Source:MGI Symbol;Acc:MGI:1930121]	protein_coding	2.36676	0.821538	2.08105	0.636433	0.216738	1.723	1.94668	1.11154	3.52337	4.72048	0.950939	2.63619
ENSMUSG00000014074	Rnf168	16	+	32277459	32301434	ring finger protein 168 [Source:MGI Symbol;Acc:MGI:1917488]	protein_coding	3.14066	2.66337	1.89861	2.49604	2.70441	3.66824	7.02167	6.57413	5.93245	5.69294	8.03249	9.77683
ENSMUSG00000014075	Tctex1d2	16	+	32419702	32429099	Tctex1 domain containing 2 [Source:MGI Symbol;Acc:MGI:1913311]	protein_coding	62.661	64.7846	73.3741	63.7622	44.2865	65.2398	39.5241	36.1291	25.1574	31.0331	9.90897	26.9981
ENSMUSG00000014077	Chp1	2	+	119547697	119587027	calcineurin-like EF hand protein 1 [Source:MGI Symbol;Acc:MGI:1927185]	protein_coding	25.3857	24.7273	24.6162	21.0889	21.5924	28.0501	9.63689	7.00722	6.42813	6.44585	4.77957	2.66906
ENSMUSG00000014104	Sval2	6	+	41852989	41864413	seminal vesicle antigen-like 2 [Source:MGI Symbol;Acc:MGI:1934254]	protein_coding	0	0	0	0	0	0	0	0	0	0	4.07983	0
ENSMUSG00000014158	Trpv4	5	-	114622152	114658421	transient receptor potential cation channel, subfamily V, member 4 [Source:MGI Symbol;Acc:MGI:1926945]	protein_coding	0	0.111687	0.13947	0	0	0	0.055917	0	0	0.197424	0	0
ENSMUSG00000014164	Klhl3	13	-	58000228	58113592	kelch-like 3 [Source:MGI Symbol;Acc:MGI:2445185]	protein_coding	0	0.008912	0	0.042313	0	0	0.091163	0.204288	0.077395	0.627583	0	0.127121
ENSMUSG00000014177	Tvp23b	11	+	62879455	62916780	trans-golgi network vesicle protein 23B [Source:MGI Symbol;Acc:MGI:1914760]	protein_coding	44.4887	41.9293	32.0309	35.8871	30.1869	36.5597	7.92926	7.82057	7.2429	10.8563	9.71478	17.5424
ENSMUSG00000014195	Dnajc7	11	-	100582818	100620188	DnaJ heat shock protein family (Hsp40) member C7 [Source:MGI Symbol;Acc:MGI:1928373]	protein_coding	41.5328	23.6699	25.8081	22.8426	15.9687	9.51023	20.5198	15.9939	19.1678	28.0728	15.7103	14.553
ENSMUSG00000014198	Zfp385c	11	-	100627543	100692455	zinc finger protein 385C [Source:MGI Symbol;Acc:MGI:3608347]	protein_coding	0	0	0	0.015003	0	0	1.15867	0	0	0	0	0.601291
ENSMUSG00000014226	Cacybp	1	-	160202367	160212875	calcyclin binding protein [Source:MGI Symbol;Acc:MGI:1270839]	protein_coding	55.5264	56.9077	52.3861	100.127	75.7065	99.6405	36.6298	35.0321	34.1623	24.24	25.1614	31.6468
ENSMUSG00000014232	Cluap1	16	+	3908801	3941147	clusterin associated protein 1 [Source:MGI Symbol;Acc:MGI:1924029]	protein_coding	13.6377	11.0912	12.8485	8.39784	6.89587	9.8816	8.09269	12.3872	10.0548	10.5312	9.08788	7.51981
ENSMUSG00000014243	Zswim7	11	-	62267224	62281375	zinc finger SWIM-type containing 7 [Source:MGI Symbol;Acc:MGI:1916997]	protein_coding	20.2006	22.2356	21.1733	16.2707	13.2531	13.9766	11.5819	17.6783	10.0887	11.1442	10.4962	23.3779
ENSMUSG00000014245	Pigl	11	+	62458460	62514417	phosphatidylinositol glycan anchor biosynthesis, class L [Source:MGI Symbol;Acc:MGI:2681271]	protein_coding	1.72716	1.72788	1.36787	1.12586	2.01374	3.27053	1.16333	1.12066	1.19196	0	0.819182	0
ENSMUSG00000014294	Ndufa2	18	-	36742332	36744557	NADH:ubiquinone oxidoreductase subunit A2 [Source:MGI Symbol;Acc:MGI:1343103]	protein_coding	136.93	203.213	186.392	163.287	234.66	268.084	311.509	351.622	356.044	359.25	276.914	218.174
ENSMUSG00000014301	Pam16	16	-	4616464	4624988	presequence translocase-asssociated motor 16 homolog (S. cerevisiae) [Source:MGI Symbol;Acc:MGI:1913699]	protein_coding	34.4859	47.9755	49.3926	61.2102	58.1488	88.0341	36.9625	59.4572	45.0325	13.2136	37.5155	26.4166
ENSMUSG00000014303	Glis2	16	+	4594713	4624924	GLIS family zinc finger 2 [Source:MGI Symbol;Acc:MGI:1932535]	protein_coding	0.020254	0.079521	0.038327	0	0	0	0	0	0.191612	0	0	0
ENSMUSG00000014313	Cox6c	15	-	35925886	35938246	cytochrome c oxidase subunit 6C [Source:MGI Symbol;Acc:MGI:104614]	protein_coding	507.877	651.299	700.352	753.591	871.561	972.71	731.232	757.113	681.224	437.327	508.91	408.689
ENSMUSG00000014329	Bicc1	10	-	70922832	71159700	BicC family RNA binding protein 1 [Source:MGI Symbol;Acc:MGI:1933388]	protein_coding	0	0	0	0.010755	0.07966	0.023296	0	0.486427	0.505911	1.33286	1.0297	1.51663
ENSMUSG00000014349	Ube2z	11	-	96047432	96065388	ubiquitin-conjugating enzyme E2Z [Source:MGI Symbol;Acc:MGI:1343160]	protein_coding	5.55402	5.66746	6.81237	8.50874	6.13345	6.83218	8.30176	7.20299	6.29145	6.0667	4.16833	6.76074
ENSMUSG00000014351	Gip	11	+	96024545	96030831	gastric inhibitory polypeptide [Source:MGI Symbol;Acc:MGI:107504]	protein_coding	0	0	0	0	0	0	0	0	0	0	0	0
ENSMUSG00000014353	Tmem87b	2	+	128818118	128854261	transmembrane protein 87B [Source:MGI Symbol;Acc:MGI:1919727]	protein_coding	12.5608	14.1313	17.4988	12.3309	9.62323	6.51388	9.92229	11.7253	7.55514	4.0751	3.85716	2.55049
ENSMUSG00000014355	Anapc1	2	-	128610104	128687391	anaphase promoting complex subunit 1 [Source:MGI Symbol;Acc:MGI:103097]	protein_coding	6.79261	5.25315	6.51106	7.2286	6.93648	8.14751	6.03556	5.40587	6.69002	4.31986	3.52239	3.99166
ENSMUSG00000014361	Mertk	2	+	128698956	128802894	MER proto-oncogene tyrosine kinase [Source:MGI Symbol;Acc:MGI:96965]	protein_coding	0.1361	0.077797	0.236803	0.627887	0	0.034999	0.061013	0.031716	0.317729	0.464248	0.205383	0.268541
ENSMUSG00000014402	Tsg101	7	-	46888949	46919969	tumor susceptibility gene 101 [Source:MGI Symbol;Acc:MGI:106581]	protein_coding	70.6941	66.8487	52.7868	72.312	56.0881	48.1066	29.7826	24.1243	28.7656	14.2946	21.0108	16.0546
ENSMUSG00000014418	Hps5	7	-	46760466	46796064	HPS5, biogenesis of lysosomal organelles complex 2 subunit 2 [Source:MGI Symbol;Acc:MGI:2180307]	protein_coding	2.94713	2.24688	2.77412	0.928823	2.04521	4.3191	3.99337	2.85505	4.29057	2.25352	2.46878	2.39703
ENSMUSG00000014426	Map3k4	17	-	12227621	12318796	mitogen-activated protein kinase kinase kinase 4 [Source:MGI Symbol;Acc:MGI:1346875]	protein_coding	2.58773	2.54216	2.43104	2.33284	2.60558	4.52134	6.38791	5.41019	5.21443	5.49015	2.0998	5.87755
ENSMUSG00000014444	Piezo1	8	-	122481698	122551329	piezo-type mechanosensitive ion channel component 1 [Source:MGI Symbol;Acc:MGI:3603204]	protein_coding	2.60344	1.55019	1.88451	3.95685	3.18725	2.62627	8.34152	7.87102	6.98942	6.77814	7.01487	3.24172
ENSMUSG00000014453	Blk	14	-	63372836	63417037	B lymphoid kinase [Source:MGI Symbol;Acc:MGI:88169]	protein_coding	0	0	0	0	0.311875	0	0.069604	0	0	0	0	0.337318
ENSMUSG00000014470	Rnf166	8	-	122466147	122476064	ring finger protein 166 [Source:MGI Symbol;Acc:MGI:1915968]	protein_coding	67.6134	51.4432	42.7471	71.5091	51.3782	56.417	33.8779	34.8365	29.1131	19.0866	15.9688	13.7564
ENSMUSG00000014496	Ankrd28	14	-	31698768	31830651	ankyrin repeat domain 28 [Source:MGI Symbol;Acc:MGI:2145661]	protein_coding	21.9513	16.4406	14.8648	9.57453	17.4062	15.8321	11.8901	9.24058	8.86138	10.7315	6.99306	10.182
ENSMUSG00000014498	Ankrd52	10	+	128377115	128408704	ankyrin repeat domain 52 [Source:MGI Symbol;Acc:MGI:2444029]	protein_coding	0.317035	0.196308	0.931123	0.543563	0.317338	0.564239	1.41612	2.59718	2.72886	1.12577	0.596875	0.708008
ENSMUSG00000014503	Pkd2l2	18	+	34408489	34444116	polycystic kidney disease 2-like 2 [Source:MGI Symbol;Acc:MGI:1858231]	protein_coding	1.60872	1.38897	1.01841	0.927027	0.975329	1.02867	0.114271	0.24905	0.078546	0.391219	0.076395	5.25179
ENSMUSG00000014504	Srp19	18	+	34330847	34336599	signal recognition particle 19 [Source:MGI Symbol;Acc:MGI:1913634]	protein_coding	101.83	135.129	127.27	191.885	145.911	135.068	103.642	111.108	128.214	92.4808	99.1921	43.2274
ENSMUSG00000014529	Tmbim7	5	+	3651181	3680325	transmembrane BAX inhibitor motif containing 7 [Source:MGI Symbol;Acc:MGI:1922305]	protein_coding	0.06942	0.08128	0	0.210314	0	0	0.082185	0	0	0	0	0.694282
ENSMUSG00000014542	Clec4f	6	-	83644542	83656187	C-type lectin domain family 4, member f [Source:MGI Symbol;Acc:MGI:1859834]	protein_coding	0.37812	0.035207	0.12972	0	0	0	0	0	0	0	0.203609	0.201022
ENSMUSG00000014543	Klra17	6	-	129831154	129876672	killer cell lectin-like receptor, subfamily A, member 17 [Source:MGI Symbol;Acc:MGI:2180674]	protein_coding	3.54754	1.94941	2.80634	0.608737	0.207314	0.229	0.807028	1.74574	1.19251	0	3.14138	7.14961
ENSMUSG00000014547	Wdfy2	14	+	62837678	62961509	WD repeat and FYVE domain containing 2 [Source:MGI Symbol;Acc:MGI:2442811]	protein_coding	7.53692	6.43788	6.44356	5.42036	2.51443	3.54532	5.57373	5.65818	4.695	1.58259	1.52335	4.45111
ENSMUSG00000014550	Rbsn	6	-	92186712	92214925	rabenosyn, RAB effector [Source:MGI Symbol;Acc:MGI:1925537]	protein_coding	2.83354	2.47247	2.77251	6.09686	3.31128	3.15308	4.93	4.13585	3.10595	0.597541	1.15145	1.70647
ENSMUSG00000014551	Mrps25	6	-	92169525	92184033	mitochondrial ribosomal protein S25 [Source:MGI Symbol;Acc:MGI:1928140]	protein_coding	8.49837	9.74353	8.35509	10.9464	10.9745	8.8819	6.99641	7.4398	7.28429	7.49445	9.43423	5.70941
ENSMUSG00000014554	Dguok	6	-	83480217	83506969	deoxyguanosine kinase [Source:MGI Symbol;Acc:MGI:1351602]	protein_coding	32.5244	37.3306	30.3846	37.8854	33.0819	24.7528	15.9012	14.7226	13.054	10.3308	4.74946	7.13192
ENSMUSG00000014592	Camta1	4	-	150917322	151861876	calmodulin binding transcription activator 1 [Source:MGI Symbol;Acc:MGI:2140230]	protein_coding	7.67402	11.024	10.5266	18.882	9.24683	21.3638	5.394	5.19221	4.33326	2.66712	0.665118	2.71276
ENSMUSG00000014599	Csf1	3	-	107741048	107760469	colony stimulating factor 1 (macrophage) [Source:MGI Symbol;Acc:MGI:1339753]	protein_coding	3.31062	1.99055	3.07148	4.12172	2.43685	2.25133	5.41643	5.13433	4.63916	0.773429	1.60451	2.60379
ENSMUSG00000014601	Strip1	3	-	107612532	107631694	striatin interacting protein 1 [Source:MGI Symbol;Acc:MGI:2443884]	protein_coding	8.28488	6.06334	8.61314	13.4376	13.3689	14.0848	23.9304	21.5217	18.5052	10.9798	15.4019	6.99816
ENSMUSG00000014602	Kif1a	1	-	93015464	93101951	kinesin family member 1A [Source:MGI Symbol;Acc:MGI:108391]	protein_coding	0	0.018709	0	0	0.002641	0.029686	0	0.561017	0.741688	0	0.063495	0
ENSMUSG00000014603	Alx3	3	+	107595031	107605776	aristaless-like homeobox 3 [Source:MGI Symbol;Acc:MGI:1277097]	protein_coding	0	0	0	0	0	0	0	0	0	0	0	0
ENSMUSG00000014606	Slc25a11	11	-	70644196	70647479	solute carrier family 25 (mitochondrial carrier oxoglutarate carrier), member 11 [Source:MGI Symbol;Acc:MGI:1915113]	protein_coding	44.2756	48.8037	46.9946	56.988	44.4171	58.4961	22.7737	26.7536	26.4782	13.5637	18.4408	17.4958
ENSMUSG00000014609	Chrne	11	-	70614883	70619216	cholinergic receptor, nicotinic, epsilon polypeptide [Source:MGI Symbol;Acc:MGI:87894]	protein_coding	0.237199	0.030718	0.404156	0.610031	0	1.6051	1.22225	0	0	0	0	0
ENSMUSG00000014633	Cmc2	8	-	116888685	116921455	COX assembly mitochondrial protein 2 [Source:MGI Symbol;Acc:MGI:1913781]	protein_coding	121.471	150.097	166.398	98.4866	118.675	118.244	138.722	187.564	125.075	109.495	111.396	86.7997
ENSMUSG00000014668	Chfr	5	+	110135842	110171972	checkpoint with forkhead and ring finger domains [Source:MGI Symbol;Acc:MGI:2444898]	protein_coding	24.3231	18.4689	15.9766	25.6217	14.8169	18.6435	14.7955	12.8939	12.5518	10.6063	10.835	8.25326
ENSMUSG00000014686	Ceacam16	7	-	19852097	19861299	carcinoembryonic antigen-related cell adhesion molecule 16 [Source:MGI Symbol;Acc:MGI:2685615]	protein_coding	0.551448	0.400657	1.05563	0	0.279206	0	0	0.146592	0	0	0	0
ENSMUSG00000014704	Hoxa2	6	-	52162417	52164831	homeobox A2 [Source:MGI Symbol;Acc:MGI:96174]	protein_coding	0	0	0	0	0	0	0	0	0	0	0	0
ENSMUSG00000014725	Adam28	14	-	68606027	68655842	a disintegrin and metallopeptidase domain 28 [Source:MGI Symbol;Acc:MGI:105988]	protein_coding	0	0	0	0.025745	0	0	0.551825	0.522017	1.28317	0.768177	2.09837	4.86512
ENSMUSG00000014747	Ankrd53	6	+	83762644	83768326	ankyrin repeat domain 53 [Source:MGI Symbol;Acc:MGI:1922555]	protein_coding	0	0	0	0	0	0	0	0	0	0	0	0
ENSMUSG00000014748	Tex261	6	-	83768885	83775813	testis expressed gene 261 [Source:MGI Symbol;Acc:MGI:1096575]	protein_coding	21.9921	21.7	19.5069	28.6956	22.9941	34.4412	16.7018	14.9376	15.8583	13.126	16.0522	9.9714
ENSMUSG00000014763	Fam120b	17	+	15396202	15433583	family with sequence similarity 120, member B [Source:MGI Symbol;Acc:MGI:1914794]	protein_coding	7.5636	4.76677	3.39565	5.41845	5.7386	4.94767	4.24045	3.12544	3.16682	2.91535	3.42752	0.932479
ENSMUSG00000014767	Tbp	17	+	15499888	15528379	TATA box binding protein [Source:MGI Symbol;Acc:MGI:101838]	protein_coding	11.5895	10.9407	9.21433	8.02127	5.50234	5.94204	1.26484	2.90612	2.28784	2.2376	1.98497	0.735533
ENSMUSG00000014769	Psmb1	17	-	15475021	15499751	proteasome (prosome, macropain) subunit, beta type 1 [Source:MGI Symbol;Acc:MGI:104884]	protein_coding	143.182	167.465	158.081	205.294	198.841	180.714	82.5779	95.023	86.4181	78.5004	84.1897	80.6882
ENSMUSG00000014771	Pdcd2	17	-	15519208	15527301	programmed cell death 2 [Source:MGI Symbol;Acc:MGI:104643]	protein_coding	9.33558	10.573	10.3248	19.9078	13.7918	22.236	13.5282	12.6673	15.9343	2.39926	4.77148	20.9109
ENSMUSG00000014773	Dll1	17	-	15367354	15376872	delta like canonical Notch ligand 1 [Source:MGI Symbol;Acc:MGI:104659]	protein_coding	0	0.031868	0	0.084673	0	0	0.1364	0.364289	0.584748	1.76268	0.775618	0.881659
ENSMUSG00000014776	Nol3	8	+	105276140	105281939	nucleolar protein 3 (apoptosis repressor with CARD domain) [Source:MGI Symbol;Acc:MGI:1925938]	protein_coding	0.553885	0.284706	0.465508	0	0.773412	0.053302	1.35079	1.223	0.173954	0	0	0
ENSMUSG00000014778	Fhod1	8	-	105329163	105347953	formin homology 2 domain containing 1 [Source:MGI Symbol;Acc:MGI:2679008]	protein_coding	4.84794	5.649	9.6215	4.31772	4.98702	3.7702	8.8686	6.83622	6.8573	1.73419	3.64499	3.62581
ENSMUSG00000014782	Plekhg4	8	+	105373274	105382862	pleckstrin homology domain containing, family G (with RhoGef domain) member 4 [Source:MGI Symbol;Acc:MGI:2142544]	protein_coding	3.53497	2.02302	1.59001	2.78876	5.49857	4.85743	1.55817	0.817949	3.60973	0.771635	2.11935	1.28497
ENSMUSG00000014786	Slc9a5	8	+	105348843	105369881	solute carrier family 9 (sodium/hydrogen exchanger), member 5 [Source:MGI Symbol;Acc:MGI:2685542]	protein_coding	0.281817	0.575525	0.496593	0	1.30039	1.26795	0.906601	0.711928	0.109755	0.738158	0.599669	0.172426
ENSMUSG00000014791	Elmo3	8	+	105305601	105310760	engulfment and cell motility 3 [Source:MGI Symbol;Acc:MGI:2679007]	protein_coding	1.15699	0.697979	0.798217	2.08803	1.32054	0.475557	0.773396	0.87452	1.53404	0	0.703251	2.70873
ENSMUSG00000014813	Stc1	14	+	69029238	69041804	stanniocalcin 1 [Source:MGI Symbol;Acc:MGI:109131]	protein_coding	0.027354	0	0	0	0	0	0.21651	0.084973	0.269085	0.640792	0.176694	0.962512
ENSMUSG00000014837	4931428F04Rik	8	-	105280409	105289864	RIKEN cDNA 4931428F04 gene [Source:MGI Symbol;Acc:MGI:1921606]	protein_coding	0.151422	0.517234	0.087397	0	0	0.573435	0.302913	0.645011	1.11881	0	0	0
ENSMUSG00000014846	Tppp3	8	-	105467493	105471526	tubulin polymerization-promoting protein family member 3 [Source:MGI Symbol;Acc:MGI:1915221]	protein_coding	1.42835	0.699752	1.8723	12.25	12.8433	10.4049	10.2159	10.5424	12.8358	2.33222	5.30937	0
ENSMUSG00000014850	Msh3	13	-	92211872	92355003	mutS homolog 3 [Source:MGI Symbol;Acc:MGI:109519]	protein_coding	3.20232	2.64563	4.0881	7.79526	2.66617	7.73978	6.23951	7.12763	5.10062	6.37443	5.09973	5.40287
ENSMUSG00000014852	Adamts13	2	+	26973416	27009628	a disintegrin-like and metallopeptidase (reprolysin type) with thrombospondin type 1 motif, 13 [Source:MGI Symbol;Acc:MGI:2685556]	protein_coding	0	0	0	0	0.012731	0	0	0	0	0	0	0
ENSMUSG00000014856	Tmem208	8	+	105326354	105335219	transmembrane protein 208 [Source:MGI Symbol;Acc:MGI:1913570]	protein_coding	101.29	110.656	106.38	154.271	159.861	132.72	49.5552	68.0477	49.0303	46.861	68.2215	49.135
ENSMUSG00000014859	E2f4	8	+	105297663	105305370	E2F transcription factor 4 [Source:MGI Symbol;Acc:MGI:103012]	protein_coding	45.9582	46.8535	32.2226	75.7417	73.8301	64.9008	19.352	19.6959	17.3947	8.56629	9.49877	7.34961
ENSMUSG00000014867	Surf4	2	-	26920040	26933928	surfeit gene 4 [Source:MGI Symbol;Acc:MGI:98445]	protein_coding	100.065	87.5743	78.1215	133.956	138.551	116.693	49.481	44.3116	46.3579	34.6408	34.9365	32.282
ENSMUSG00000014873	Surf2	2	+	26916367	26920183	surfeit gene 2 [Source:MGI Symbol;Acc:MGI:98444]	protein_coding	8.92258	14.0643	16.0359	12.677	10.1555	20.4495	12.7924	6.23527	4.99687	2.75723	1.00981	4.88773
ENSMUSG00000014905	Dnajb9	12	-	44205559	44210326	DnaJ heat shock protein family (Hsp40) member B9 [Source:MGI Symbol;Acc:MGI:1351618]	protein_coding	16.9803	13.8746	15.5192	14.3861	12.5507	19.8742	10.8424	9.58713	10.8267	3.9061	7.31939	4.70346
ENSMUSG00000014907	Naf1	8	+	66860217	66890564	nuclear assembly factor 1 ribonucleoprotein [Source:MGI Symbol;Acc:MGI:2682306]	protein_coding	1.43277	1.54441	1.34053	3.72708	3.42479	3.3826	3.15247	5.52409	5.76687	4.07369	4.05316	2.76756
ENSMUSG00000014932	Yes1	5	+	32611171	32687057	YES proto-oncogene 1, Src family tyrosine kinase [Source:MGI Symbol;Acc:MGI:99147]	protein_coding	0.048187	0.057634	0.102278	0.219455	0	1.55964	1.87914	0.187243	0.602598	1.4649	0.764667	4.60815
ENSMUSG00000014956	Ppp1cb	5	+	32458843	32517433	protein phosphatase 1 catalytic subunit beta [Source:MGI Symbol;Acc:MGI:104871]	protein_coding	23.5826	21.5828	17.7684	30.9921	25.6878	28.5888	13.9155	8.82967	10.2345	18.1023	6.94688	17.2864
ENSMUSG00000014959	Gorasp2	2	+	70661576	70712636	golgi reassembly stacking protein 2 [Source:MGI Symbol;Acc:MGI:2135962]	protein_coding	40.5881	46.6262	35.4776	80.773	66.5837	67.5424	29.2191	25.9167	33.1163	29.5135	18.938	20.8766
ENSMUSG00000014980	Tsen15	1	-	152370735	152386688	tRNA splicing endonuclease subunit 15 [Source:MGI Symbol;Acc:MGI:1913887]	protein_coding	10.2588	11.5783	9.19816	17.0921	13.0236	18.3575	5.31897	8.23954	6.73179	4.69357	4.08695	2.40465
ENSMUSG00000015001	Oc90	15	-	65876053	65912397	otoconin 90 [Source:MGI Symbol;Acc:MGI:1313269]	protein_coding	0	0	0.03755	0	0	0	0	0	0.095818	0.181302	0	0.336095
ENSMUSG00000015002	Efr3a	15	+	65787034	65873816	EFR3 homolog A [Source:MGI Symbol;Acc:MGI:1923990]	protein_coding	24.7502	19.6408	16.1993	22.6339	12.6938	19.846	15.9995	14.9381	18.1605	16.5002	16.5365	15.7008
ENSMUSG00000015013	Trappc2l	8	+	122611640	122616660	trafficking protein particle complex 2-like [Source:MGI Symbol;Acc:MGI:1916295]	protein_coding	88.2563	123.109	98.407	112.997	87.7322	105.478	63.4056	68.3562	56.9209	56.6011	34.9584	24.2604
ENSMUSG00000015016	Acsf3	8	+	122775486	122817880	acyl-CoA synthetase family member 3 [Source:MGI Symbol;Acc:MGI:2182591]	protein_coding	1.63719	2.03846	2.09553	2.95412	1.61478	1.19535	3.80172	5.94652	4.27827	2.57766	4.26282	3.5875
ENSMUSG00000015023	Ddx19a	8	-	110974996	110997800	DEAD (Asp-Glu-Ala-Asp) box polypeptide 19a [Source:MGI Symbol;Acc:MGI:99526]	protein_coding	2.63254	2.81651	4.01014	5.45182	2.1568	4.61204	6.37583	4.08467	4.63841	6.49783	8.91987	4.60966
ENSMUSG00000015027	Galns	8	-	122578242	122611463	galactosamine (N-acetyl)-6-sulfate sulfatase [Source:MGI Symbol;Acc:MGI:1355303]	protein_coding	12.078	11.0798	14.1455	17.2225	18.0658	11.1987	8.24098	9.73917	7.14608	6.51649	4.18266	7.72262
ENSMUSG00000015053	Gata2	6	+	88193891	88207032	GATA binding protein 2 [Source:MGI Symbol;Acc:MGI:95662]	protein_coding	0.09587	0.240469	0.083233	6.0154	3.8799	4.36716	0.731853	1.02658	0.862263	1.91662	2.51323	2.81721
ENSMUSG00000015083	C8g	2	-	25498651	25501719	complement component 8, gamma polypeptide [Source:MGI Symbol;Acc:MGI:88237]	protein_coding	2.23813	1.53959	1.78254	3.61454	1.88903	1.04758	0	2.38373	0	0	3.09292	0
ENSMUSG00000015085	Entpd2	2	+	25395874	25401321	ectonucleoside triphosphate diphosphohydrolase 2 [Source:MGI Symbol;Acc:MGI:1096863]	protein_coding	0	0	0.036142	0	0	0	0	0.43502	0	0	0	0
ENSMUSG00000015087	Rabl6	2	-	25583018	25608521	RAB, member RAS oncogene family-like 6 [Source:MGI Symbol;Acc:MGI:2442633]	protein_coding	9.48958	7.98408	11.0002	15.422	10.3846	15.3203	29.9101	34.8477	27.6385	20.7831	17.3787	21.243
ENSMUSG00000015090	Ptgds	2	-	25466709	25470046	prostaglandin D2 synthase (brain) [Source:MGI Symbol;Acc:MGI:99261]	protein_coding	0.253858	0	0.919853	0	1.96226	0	0.207145	2.72264	5.58502	0	0.310516	0
ENSMUSG00000015092	Edf1	2	+	25557847	25562082	endothelial differentiation-related factor 1 [Source:MGI Symbol;Acc:MGI:1891227]	protein_coding	175.856	201.155	206.839	240.531	191.179	221.361	185.116	251.703	216.948	112.916	163.635	127.249
ENSMUSG00000015093	Clic3	2	+	25456838	25458776	chloride intracellular channel 3 [Source:MGI Symbol;Acc:MGI:1916704]	protein_coding	0	0	0	0	0	0	0	0	0	0	0	0
ENSMUSG00000015094	Npdc1	2	+	25399351	25409494	neural proliferation, differentiation and control 1 [Source:MGI Symbol;Acc:MGI:1099802]	protein_coding	0.553398	0.54647	0.445632	0.835785	1.0713	1.60235	0.191622	1.01275	0.59122	0	0	0.543279
ENSMUSG00000015095	Fbxw5	2	+	25500750	25505471	F-box and WD-40 domain protein 5 [Source:MGI Symbol;Acc:MGI:1354731]	protein_coding	9.54889	6.92603	9.21993	9.26703	9.52371	9.36621	6.36882	4.80466	4.09178	3.39647	3.79985	1.92645
ENSMUSG00000015112	Slc25a13	6	-	6041218	6217173	solute carrier family 25 (mitochondrial carrier, adenine nucleotide translocator), member 13 [Source:MGI Symbol;Acc:MGI:1354721]	protein_coding	4.26904	4.16589	3.19753	7.1095	6.12147	10.7016	3.33449	3.5393	4.0442	5.01888	4.41516	3.48867
ENSMUSG00000015120	Ube2i	17	-	25261916	25274622	ubiquitin-conjugating enzyme E2I [Source:MGI Symbol;Acc:MGI:107365]	protein_coding	204.155	230.72	182.545	334.832	287.702	251.591	43.8304	56.9985	54.3714	10.2658	25.8177	6.18107
ENSMUSG00000015126	Tsr3	17	+	25240170	25242798	TSR3 20S rRNA accumulation [Source:MGI Symbol;Acc:MGI:1915577]	protein_coding	14.8549	11.5921	11.7977	25.3518	21.5219	19.0483	12.5116	13.1035	12.7077	6.80909	6.24793	4.66123
ENSMUSG00000015127	Unkl	17	+	25188397	25234443	unkempt family like zinc finger [Source:MGI Symbol;Acc:MGI:1921404]	protein_coding	0.132955	0.04755	0.065175	0.156602	0.03062	1.13459	0	2.76332	0.285836	0.208471	0	0
ENSMUSG00000015133	Lrrk1	7	-	66226912	66388350	leucine-rich repeat kinase 1 [Source:MGI Symbol;Acc:MGI:2142227]	protein_coding	3.84939	4.34198	4.11188	4.7053	4.81578	2.49791	4.6449	4.20039	3.53324	8.09938	4.45834	1.36837
ENSMUSG00000015134	Aldh1a3	7	-	66390890	66427517	aldehyde dehydrogenase family 1, subfamily A3 [Source:MGI Symbol;Acc:MGI:1861722]	protein_coding	0.213695	0	0	0	0	0	0.184665	0	0.38871	0.986096	0	0
ENSMUSG00000015143	Actn1	12	-	80167547	80260371	actinin, alpha 1 [Source:MGI Symbol;Acc:MGI:2137706]	protein_coding	24.4553	24.3514	23.7074	11.4421	11.831	10.7465	40.6354	39.0098	39.8874	15.9299	20.9926	17.7278
ENSMUSG00000015149	Sirt2	7	+	28766735	28788661	sirtuin 2 [Source:MGI Symbol;Acc:MGI:1927664]	protein_coding	18.8413	16.2684	18.3194	21.0034	20.7998	21.5369	20.135	14.5655	20.2473	12.1071	6.69548	5.80736
ENSMUSG00000015165	Hnrnpl	7	+	28808541	28822266	heterogeneous nuclear ribonucleoprotein L [Source:MGI Symbol;Acc:MGI:104816]	protein_coding	36.59	31.9031	29.1196	46.2074	46.8735	49.7681	80.0577	40.8945	45.2668	36.292	43.0863	86.8501
ENSMUSG00000015176	Nolc1	19	+	46075863	46085530	nucleolar and coiled-body phosphoprotein 1 [Source:MGI Symbol;Acc:MGI:1918019]	protein_coding	11.6903	15.1484	13.6435	20.0227	15.1752	17.7307	42.8385	35.6901	48.9463	26.6679	21.4821	20.8843
ENSMUSG00000015189	Casd1	6	+	4600839	4643355	CAS1 domain containing 1 [Source:MGI Symbol;Acc:MGI:2384865]	protein_coding	9.29109	8.11312	7.52213	6.07081	5.46394	6.35495	4.57186	5.70212	4.35671	4.77213	5.85431	3.16978
ENSMUSG00000015202	Cnksr3	10	-	7119063	7212237	Cnksr family member 3 [Source:MGI Symbol;Acc:MGI:2674130]	protein_coding	0.822119	0.579638	0.781118	0.599559	1.03452	0.259344	0.841422	0.874812	0.371194	0	0.347101	0.215064
ENSMUSG00000015214	Mtmr1	X	+	71364760	71419196	myotubularin related protein 1 [Source:MGI Symbol;Acc:MGI:1858271]	protein_coding	6.04546	3.9124	4.58138	7.51461	7.44905	4.01422	3.71575	3.60939	2.84624	3.60953	2.2512	0.679683
ENSMUSG00000015217	Hmgb3	X	+	71555918	71560676	high mobility group box 3 [Source:MGI Symbol;Acc:MGI:1098219]	protein_coding	27.2551	24.2963	23.5005	46.116	29.6721	35.0661	14.7367	19.0394	18.9105	18.1399	15.7859	14.025
ENSMUSG00000015222	Map2	1	+	66175273	66442583	microtubule-associated protein 2 [Source:MGI Symbol;Acc:MGI:97175]	protein_coding	0.020091	0	0	0.022106	0.020496	0.035401	0.472079	1.23417	0.799444	0.71824	0.470627	1.30303
ENSMUSG00000015224	Cyp2j9	4	-	96568429	96591578	cytochrome P450, family 2, subfamily j, polypeptide 9 [Source:MGI Symbol;Acc:MGI:1921769]	protein_coding	0	0	0.021832	0	0.030311	0	0	0	0	0.986099	0.481123	2.17979
ENSMUSG00000015242	Nipsnap3a	4	+	52989272	53001162	nipsnap homolog 3A [Source:MGI Symbol;Acc:MGI:1920648]	protein_coding	0	0	0	0	0	0	0	0	0.308813	0	0	1.48778
ENSMUSG00000015243	Abca1	4	-	53030787	53159895	ATP-binding cassette, sub-family A (ABC1), member 1 [Source:MGI Symbol;Acc:MGI:99607]	protein_coding	1.51709	1.0306	0.555819	0.709083	0.205334	0.064408	0.32345	0.373695	0.456701	0.602659	0.279925	0.51118
ENSMUSG00000015247	Nipsnap3b	4	+	53011880	53022060	nipsnap homolog 3B [Source:MGI Symbol;Acc:MGI:1913786]	protein_coding	81.19	82.6217	72.1335	113.378	116.67	88.7293	18.8624	10.627	17.6616	19.5779	10.6721	8.86706
ENSMUSG00000015289	Lage3	X	-	74351276	74353618	L antigen family, member 3 [Source:MGI Symbol;Acc:MGI:1913442]	protein_coding	33.7992	56.1805	50.9251	51.1839	66.1789	65.8286	21.5117	36.4715	32.0639	9.82563	15.7552	2.06997
ENSMUSG00000015290	Ubl4a	X	-	74365718	74373218	ubiquitin-like 4A [Source:MGI Symbol;Acc:MGI:95049]	protein_coding	32.8934	35.1384	38.0779	49.355	55.5263	49.0884	17.1313	23.1904	21.7403	17.1943	18.1201	12.3789
ENSMUSG00000015291	Gdi1	X	+	74304998	74311862	guanosine diphosphate (GDP) dissociation inhibitor 1 [Source:MGI Symbol;Acc:MGI:99846]	protein_coding	38.989	27.6003	31.8255	38.0698	40.5283	32.5494	17.7867	16.7354	22.8947	6.21761	8.43767	3.86336
ENSMUSG00000015305	Sash1	10	-	8722219	8886070	SAM and SH3 domain containing 1 [Source:MGI Symbol;Acc:MGI:1917347]	protein_coding	0.031761	0	0.018661	0.008769	0	0.054476	0	0.270257	0.440577	0.56221	0.907871	2.27157
ENSMUSG00000015312	Gadd45b	10	+	80930073	80932204	growth arrest and DNA-damage-inducible 45 beta [Source:MGI Symbol;Acc:MGI:107776]	protein_coding	34.0454	43.7478	47.6254	50.4109	45.3443	50.8112	90.0426	86.3621	85.3648	36.4611	41.0813	32.6866
ENSMUSG00000015314	Slamf6	1	+	171917515	171953170	SLAM family member 6 [Source:MGI Symbol;Acc:MGI:1353620]	protein_coding	0.025122	0	0.110871	0.083463	0.076209	0.013391	0.529989	0.253801	1.28355	0.816743	1.30365	1.76716
ENSMUSG00000015316	Slamf1	1	+	171767127	171801184	signaling lymphocytic activation molecule family member 1 [Source:MGI Symbol;Acc:MGI:1351314]	protein_coding	0	0	0	0	0.104371	0	0	0	0	0.170729	0.300455	0
ENSMUSG00000015335	Zdhhc12	2	-	30090944	30093648	zinc finger, DHHC domain containing 12 [Source:MGI Symbol;Acc:MGI:1913470]	protein_coding	25.8511	22.8811	18.7515	33.0672	35.3957	32.3931	16.8868	12.106	11.6649	5.05744	7.56066	2.82729
ENSMUSG00000015337	Endog	2	+	30171493	30174069	endonuclease G [Source:MGI Symbol;Acc:MGI:1261433]	protein_coding	5.0109	5.22428	4.84822	11.7435	14.4411	11.8104	4.60881	3.0909	3.66787	18.4695	2.09147	1.21416
ENSMUSG00000015340	Cybb	X	-	9435252	9487771	cytochrome b-245, beta polypeptide [Source:MGI Symbol;Acc:MGI:88574]	protein_coding	280.518	233.758	234.307	136.023	116.307	126.043	124.413	134.199	127.677	52.6677	52.5275	54.1211
ENSMUSG00000015341	Golga7	8	-	23241346	23257074	golgi autoantigen, golgin subfamily a, 7 [Source:MGI Symbol;Acc:MGI:1931029]	protein_coding	145.703	111.708	87.9952	140.962	114.515	104.324	26.5368	20.7486	17.289	18.3853	15.0073	25.0332
ENSMUSG00000015342	Xk	X	+	9272756	9313250	X-linked Kx blood group [Source:MGI Symbol;Acc:MGI:103569]	protein_coding	0.234986	0.065683	0.113206	0	0.849991	0.69538	0.550489	0.129707	0.207787	0	0.229735	0
ENSMUSG00000015354	Pcolce2	9	+	95637601	95698096	procollagen C-endopeptidase enhancer 2 [Source:MGI Symbol;Acc:MGI:1923727]	protein_coding	0	0	0	0	0	0	0.104627	0.182027	0.219614	0.147982	0	2.47381
ENSMUSG00000015355	Cd48	1	+	171682009	171705258	CD48 antigen [Source:MGI Symbol;Acc:MGI:88339]	protein_coding	0.705398	0.608619	0	9.36558	5.42422	5.63907	1.95815	0.266613	0.695184	0.114816	0.388186	0
ENSMUSG00000015357	Clpx	9	+	65294260	65330658	caseinolytic mitochondrial matrix peptidase chaperone subunit [Source:MGI Symbol;Acc:MGI:1346017]	protein_coding	13.2399	9.2376	9.04005	10.233	9.39779	8.01719	7.10111	5.42933	6.17922	5.17803	6.99476	4.7378
ENSMUSG00000015363	Trabd	15	+	89075124	89087077	TraB domain containing [Source:MGI Symbol;Acc:MGI:1915226]	protein_coding	40.4291	34.8214	37.2948	80.2106	60.981	74.5008	35.9718	28.7574	37.7025	28.2192	37.8803	31.7534
ENSMUSG00000015365	Mov10l1	15	+	88982909	89055152	Mov10 like RISC complex RNA helicase 1 [Source:MGI Symbol;Acc:MGI:1891384]	protein_coding	0	0	0	0	0	0	0.006001	0	0	0	0	0.126558
ENSMUSG00000015377	Dennd6b	15	-	89182213	89196496	DENN/MADD domain containing 6B [Source:MGI Symbol;Acc:MGI:1916690]	protein_coding	0.202362	0.141288	0.458986	0.078751	0.223524	1.26501	0.863422	1.35479	0.298732	0.889749	0.19729	0.406249
ENSMUSG00000015396	Cd83	13	+	43784775	43803132	CD83 antigen [Source:MGI Symbol;Acc:MGI:1328316]	protein_coding	0.056212	0	0	0.759674	0.065675	0	0	0.321471	0.281791	0	0	0
ENSMUSG00000015401	Cltrn	X	+	164088830	164118860	collectrin, amino acid transport regulator [Source:MGI Symbol;Acc:MGI:1926234]	protein_coding	0	0	0	0	0	0	0	0.112265	0.601447	0	0.884205	0.896745
ENSMUSG00000015405	Ace2	X	+	164139332	164188420	angiotensin I converting enzyme (peptidyl-dipeptidase A) 2 [Source:MGI Symbol;Acc:MGI:1917258]	protein_coding	0	0	0	0	0	0	0	0	0	0.204166	0	0
ENSMUSG00000015437	Gzmb	14	-	56258838	56262260	granzyme B [Source:MGI Symbol;Acc:MGI:109267]	protein_coding	0	0	0	0	0	1.55643	0.619362	0.64752	0.462621	0	0	0
ENSMUSG00000015441	Gzmf	14	-	56205263	56211417	granzyme F [Source:MGI Symbol;Acc:MGI:109254]	protein_coding	0	0	0	0	0	0	0	0	0	0	0	0
ENSMUSG00000015443	Gzmn	14	-	56165797	56174599	granzyme N [Source:MGI Symbol;Acc:MGI:2675494]	protein_coding	0	0	0	0	0	0	0	0	0	0	0	0
ENSMUSG00000015451	C4a	17	-	34809092	34823464	complement component 4A (Rodgers blood group) [Source:MGI Symbol;Acc:MGI:98320]	processed_transcript	0	0.006717	0.074057	0	0.56235	0	0.233135	0	0.939407	0	0	0.215094
ENSMUSG00000015452	Ager	17	+	34597862	34600936	advanced glycosylation end product-specific receptor [Source:MGI Symbol;Acc:MGI:893592]	protein_coding	2.86764	2.43681	4.07579	3.44258	2.93662	4.91434	5.15538	2.78417	2.59074	1.42235	2.10701	0
ENSMUSG00000015461	Atf6b	17	+	34647146	34655074	activating transcription factor 6 beta [Source:MGI Symbol;Acc:MGI:105121]	protein_coding	14.0233	7.1507	8.62639	14.8209	15.6957	14.3683	9.97923	13.1651	11.4091	9.6661	10.0039	10.0112
ENSMUSG00000015467	Egfl8	17	-	34613349	34615971	EGF-like domain 8 [Source:MGI Symbol;Acc:MGI:1932094]	protein_coding	0.668641	0.754223	0.300499	1.01056	0.145092	1.36429	3.32097	2.80226	1.94296	3.93166	0.369235	0.222972
ENSMUSG00000015468	Notch4	17	+	34564268	34588503	notch 4 [Source:MGI Symbol;Acc:MGI:107471]	protein_coding	0	0.152764	0.06164	0	0	0.213386	0	0	0	0.149573	0.999845	0
ENSMUSG00000015474	Ppt2	17	-	34616662	34628510	palmitoyl-protein thioesterase 2 [Source:MGI Symbol;Acc:MGI:1860075]	protein_coding	19.2438	15.2437	14.2045	17.132	14.8053	18.4179	12.4344	11.0396	12.1344	5.27596	5.37982	13.2007
ENSMUSG00000015476	Prrt1	17	+	34629533	34633126	proline-rich transmembrane protein 1 [Source:MGI Symbol;Acc:MGI:1932118]	protein_coding	0.137898	0.185048	0.552151	0.197109	0	0	0	0.72825	0.876727	0	0.272129	0.523728
ENSMUSG00000015478	Rnf5	17	-	34601091	34603690	ring finger protein 5 [Source:MGI Symbol;Acc:MGI:1860076]	protein_coding	42.8755	38.2911	34.7103	46.7931	51.4851	49.6111	11.7616	6.78146	14.6716	6.7165	20.9888	6.43036
ENSMUSG00000015484	Fam163a	1	-	156075966	156205026	family with sequence similarity 163, member A [Source:MGI Symbol;Acc:MGI:3618859]	protein_coding	0	0	0	0	0	0	0	0	0	0	0	0
ENSMUSG00000015488	Cacfd1	2	+	27009926	27021089	calcium channel flower domain containing 1 [Source:MGI Symbol;Acc:MGI:1924317]	protein_coding	9.53153	6.85682	8.561	12.0848	4.74806	9.57835	5.3331	5.86693	5.35462	2.29824	1.72262	3.52031
ENSMUSG00000015501	Hivep2	10	+	13966075	14151374	human immunodeficiency virus type I enhancer binding protein 2 [Source:MGI Symbol;Acc:MGI:1338076]	protein_coding	0	0	0	0	0.045088	0	0.038554	0.117754	0.228047	0.162361	0.097998	0.78987
ENSMUSG00000015519	2310057J18Rik	10	-	28972288	28986303	RIKEN cDNA 2310057J18 gene [Source:MGI Symbol;Acc:MGI:1914969]	protein_coding	0	0	0	0	0	0	0	0	0	0	0	0
ENSMUSG00000015522	Arnt	3	+	95434388	95497240	aryl hydrocarbon receptor nuclear translocator [Source:MGI Symbol;Acc:MGI:88071]	protein_coding	8.26237	5.07532	5.1978	4.20746	6.48832	6.72114	4.296	4.48249	4.52325	5.77938	2.88881	2.30235
ENSMUSG00000015533	Itga2	13	-	114833081	114932100	integrin alpha 2 [Source:MGI Symbol;Acc:MGI:96600]	protein_coding	0	0	0	0	0.01035	0	0	0	0	0.357808	0	0.364238
ENSMUSG00000015536	Mocs2	13	+	114818236	114832275	molybdenum cofactor synthesis 2 [Source:MGI Symbol;Acc:MGI:1336894]	protein_coding	35.2441	43.7639	39.9818	42.8731	44.3032	45.9798	19.2675	19.0639	24.5489	7.21659	8.02483	14.2629
ENSMUSG00000015542	Nat9	11	-	115182832	115187859	N-acetyltransferase 9 (GCN5-related, putative) [Source:MGI Symbol;Acc:MGI:1913426]	protein_coding	13.9522	15.3882	15.4571	12.9789	12.4779	7.80903	10.604	12.2694	10.0102	12.6802	12.1549	16.6182
ENSMUSG00000015568	Lpl	8	+	68880491	68907448	lipoprotein lipase [Source:MGI Symbol;Acc:MGI:96820]	protein_coding	9.26182	7.92107	8.65668	3.98613	2.14223	2.5924	7.66038	8.67412	9.10321	1.488	1.76646	1.97683
ENSMUSG00000015575	Atp6v0e	17	+	26663231	26699647	ATPase, H+ transporting, lysosomal V0 subunit E [Source:MGI Symbol;Acc:MGI:1328318]	protein_coding	430.701	513.015	434.022	470.371	502.097	448.98	133.89	152.44	119.997	91.7268	70.6011	59.5591
ENSMUSG00000015579	Nkx2-5	17	-	26838664	26845009	NK2 homeobox 5 [Source:MGI Symbol;Acc:MGI:97350]	protein_coding	0	0	0	0	0	0	0	0	0	0	0	0
ENSMUSG00000015597	Zfp318	17	+	46383731	46420920	zinc finger protein 318 [Source:MGI Symbol;Acc:MGI:1889348]	protein_coding	1.11587	0.931164	1.11478	1.06987	0.81011	0.682616	2.89957	2.08565	3.12859	1.4051	5.53973	1.84219
ENSMUSG00000015599	Ttbk1	17	-	46442448	46487675	tau tubulin kinase 1 [Source:MGI Symbol;Acc:MGI:2147036]	protein_coding	0	0	0	0	0	0	0	0.079067	0	0	0	0.122682
ENSMUSG00000015605	Srf	17	-	46548329	46556175	serum response factor [Source:MGI Symbol;Acc:MGI:106658]	protein_coding	5.83803	6.94537	6.25554	5.63567	9.14348	9.99959	8.63525	9.27529	6.39	5.94171	7.29512	2.6166
ENSMUSG00000015619	Gata3	2	-	9857078	9890034	GATA binding protein 3 [Source:MGI Symbol;Acc:MGI:95663]	protein_coding	0	0	0	0	0.097113	0	0.674141	1.09782	1.72779	2.39925	1.61679	8.75691
ENSMUSG00000015627	Gata5	2	-	180325133	180334699	GATA binding protein 5 [Source:MGI Symbol;Acc:MGI:109497]	protein_coding	0	0	0	0	0	0	0	0	0	0	0	0
ENSMUSG00000015647	Lama5	2	-	180176373	180225859	laminin, alpha 5 [Source:MGI Symbol;Acc:MGI:105382]	protein_coding	0	0.018649	0.079269	0.035149	0.007556	0.471598	0	0.043235	0	0.018932	0	0
ENSMUSG00000015652	Steap1	5	-	5736317	5749326	six transmembrane epithelial antigen of the prostate 1 [Source:MGI Symbol;Acc:MGI:1917608]	protein_coding	0.123253	0.106718	0	3.87863	8.50063	4.4257	0	0	0.420243	0	0	0
ENSMUSG00000015653	Steap2	5	-	5664829	5694578	six transmembrane epithelial antigen of prostate 2 [Source:MGI Symbol;Acc:MGI:1921301]	protein_coding	1.88252	0.832907	1.13895	2.95112	2.64893	0.768472	1.22727	1.9547	1.17558	1.97846	1.22465	4.84449
ENSMUSG00000015656	Hspa8	9	+	40800984	40810087	heat shock protein 8 [Source:MGI Symbol;Acc:MGI:105384]	protein_coding	319.651	261.01	302.49	331.658	315.785	287.833	329.845	367.564	336.85	175.691	185.684	175.072
ENSMUSG00000015659	Serac1	17	-	6042196	6079741	serine active site containing 1 [Source:MGI Symbol;Acc:MGI:2447813]	protein_coding	0.592042	0.561544	0.540157	1.33831	0.755028	0.336685	0.957826	0.537434	0.747875	0.33842	0.624359	1.06215
ENSMUSG00000015665	Awat1	X	+	100572251	100578205	acyl-CoA wax alcohol acyltransferase 1 [Source:MGI Symbol;Acc:MGI:3588200]	protein_coding	1.59511	0.345707	0.530805	0	1.12324	0.05725	0	0	0	0	0	0
ENSMUSG00000015668	Pdzd11	X	-	100622883	100626568	PDZ domain containing 11 [Source:MGI Symbol;Acc:MGI:1919871]	protein_coding	32.9683	39.3703	27.0169	48.6006	33.4294	32.7574	12.9908	11.9833	14.0907	10.7705	10.8824	7.50102
ENSMUSG00000015671	Psma2	13	+	14613240	14674236	proteasome subunit alpha 2 [Source:MGI Symbol;Acc:MGI:104885]	protein_coding	87.6191	108.997	108.461	140.079	115.839	136.699	45.6535	51.4284	48.0482	39.0816	22.7464	16.1546
ENSMUSG00000015672	Mrpl32	13	-	14608184	14613165	mitochondrial ribosomal protein L32 [Source:MGI Symbol;Acc:MGI:2137226]	protein_coding	18.3503	22.7223	18.3429	28.8596	27.3429	22.8404	8.87425	11.2512	6.69543	11.5305	9.52739	19.3539
ENSMUSG00000015697	Setdb1	3	-	95323525	95357202	SET domain, bifurcated 1 [Source:MGI Symbol;Acc:MGI:1934229]	protein_coding	4.48991	3.35723	2.65255	5.16309	1.77028	3.53814	5.05553	5.38757	3.50999	3.33737	3.71649	3.20896
ENSMUSG00000015702	Anxa9	3	-	95296096	95307176	annexin A9 [Source:MGI Symbol;Acc:MGI:1923711]	protein_coding	3.03888	2.46177	3.232	1.28552	2.45293	4.29548	2.07755	4.13881	3.12002	2.53291	1.00666	1.18854
ENSMUSG00000015709	Arnt2	7	-	84246278	84410176	aryl hydrocarbon receptor nuclear translocator 2 [Source:MGI Symbol;Acc:MGI:107188]	protein_coding	0.534954	0.232374	0.453566	0	0	0.010203	0.228757	0.227195	0.468263	0	0	0.22779
ENSMUSG00000015711	Prune1	3	-	95253674	95282076	prune exopolyphosphatase [Source:MGI Symbol;Acc:MGI:1925152]	protein_coding	5.20427	4.0946	4.70224	2.55457	3.26771	2.64072	2.85285	2.04852	1.39847	0.844846	1.60624	1.0605
ENSMUSG00000015714	Cers2	3	+	95314791	95323599	ceramide synthase 2 [Source:MGI Symbol;Acc:MGI:1924143]	protein_coding	58.3986	57.5094	43.9005	59.524	63.22	58.2836	29.3801	29.7244	29.4568	20.053	19.6343	13.0029
ENSMUSG00000015721	Nlrp5	7	+	23385889	23441922	NLR family, pyrin domain containing 5 [Source:MGI Symbol;Acc:MGI:1345193]	protein_coding	0	0	0	0	0	0.115196	0.097015	0.02737	0	0.155271	0.024362	0.50632
ENSMUSG00000015733	Capza2	6	+	17636234	17666972	capping protein (actin filament) muscle Z-line, alpha 2 [Source:MGI Symbol;Acc:MGI:106222]	protein_coding	220.237	212.139	143.249	196.922	174.879	137.051	51.7687	42.5572	42.0168	37.1124	38.9253	29.179
ENSMUSG00000015745	Plekho1	3	-	95988429	95996001	pleckstrin homology domain containing, family O member 1 [Source:MGI Symbol;Acc:MGI:1914470]	protein_coding	4.45301	6.04587	6.33612	3.15763	1.67619	5.58447	19.6291	19.1806	18.8595	3.38302	6.13272	9.81184
ENSMUSG00000015747	Vps45	3	-	95999832	96058466	vacuolar protein sorting 45 [Source:MGI Symbol;Acc:MGI:891965]	protein_coding	5.28115	3.95434	3.59149	3.18707	6.18519	5.38076	4.08685	5.37923	4.60264	3.84679	2.04487	6.36671
ENSMUSG00000015748	Prpf3	3	-	95830124	95855885	pre-mRNA processing factor 3 [Source:MGI Symbol;Acc:MGI:1918017]	protein_coding	4.98229	6.55989	5.14961	8.18567	10.5479	5.68226	14.9246	9.76656	10.5376	12.2167	12.287	2.57663
ENSMUSG00000015749	Anp32e	3	+	95929246	95947390	acidic (leucine-rich) nuclear phosphoprotein 32 family, member E [Source:MGI Symbol;Acc:MGI:1913721]	protein_coding	12.9131	9.78464	12.9959	17.9979	10.0096	12.1647	15.2994	16.5182	13.0475	19.1172	13.5122	15.6644
ENSMUSG00000015750	Aph1a	3	+	95893969	95898288	aph1 homolog A, gamma secretase subunit [Source:MGI Symbol;Acc:MGI:2385110]	protein_coding	3.37565	5.25325	3.38389	7.15599	3.18289	2.45397	3.00644	3.82622	2.53525	2.0245	2.38658	1.68767
ENSMUSG00000015755	Tab2	10	-	7905653	7956230	TGF-beta activated kinase 1/MAP3K7 binding protein 2 [Source:MGI Symbol;Acc:MGI:1915902]	protein_coding	16.5896	12.9917	14.2105	14.1395	11.7437	15.3407	19.7267	17.0452	19.3525	13.8148	9.67402	10.9391
ENSMUSG00000015757	Ppil4	10	+	7792891	7823135	peptidylprolyl isomerase (cyclophilin)-like 4 [Source:MGI Symbol;Acc:MGI:1914668]	protein_coding	23.644	20.2432	19.9541	19.0082	11.0839	13.5711	24.8896	23.9905	23.6033	19.0471	17.9902	16.9247
ENSMUSG00000015759	Cnih1	14	-	46775567	46788411	cornichon family AMPA receptor auxiliary protein 1 [Source:MGI Symbol;Acc:MGI:1277202]	protein_coding	33.6621	39.0195	35.5419	56.9753	53.1632	48.3456	16.7938	17.3778	21.2279	12.0754	17.3109	10.0879
ENSMUSG00000015766	Eps8	6	-	137477245	137654876	epidermal growth factor receptor pathway substrate 8 [Source:MGI Symbol;Acc:MGI:104684]	protein_coding	1.7935	1.34461	1.30107	0.23254	1.46675	1.08946	2.19865	1.33652	2.66293	1.69112	2.69612	4.91646
ENSMUSG00000015776	Med22	2	-	26905262	26910677	mediator complex subunit 22 [Source:MGI Symbol;Acc:MGI:98446]	protein_coding	7.1302	5.68546	5.26177	5.33937	7.21063	6.98229	5.10171	3.5324	2.91205	2.2163	4.22053	1.50748
ENSMUSG00000015787	Abo	2	-	26842503	26864979	ABO blood group (transferase A, alpha 1-3-N-acetylgalactosaminyltransferase, transferase B, alpha 1-3-galactosyltransferase) [Source:MGI Symbol;Acc:MGI:2135738]	protein_coding	0	0	0	0	0	0	0	0	0	0	0	0
ENSMUSG00000015790	Surf1	2	-	26913381	26916530	surfeit gene 1 [Source:MGI Symbol;Acc:MGI:98443]	protein_coding	33.9089	33.2673	31.3395	47.6876	43.6684	38.3628	15.9026	21.3713	16.3877	10.8554	10.7443	0
ENSMUSG00000015804	Med28	5	+	45520229	45529276	mediator complex subunit 28 [Source:MGI Symbol;Acc:MGI:1914249]	protein_coding	36.0569	67.8665	42.9583	74.7205	53.2511	50.6621	11.3755	26.2994	10.6927	9.33077	9.67303	8.64353
ENSMUSG00000015806	Qdpr	5	-	45434021	45450236	quinoid dihydropteridine reductase [Source:MGI Symbol;Acc:MGI:97836]	protein_coding	28.9411	31.9925	29.7456	40.4934	35.4871	43.2552	16.7432	17.7236	14.8416	12.0957	14.8628	24.4069
ENSMUSG00000015812	Gnrh1	14	+	67745181	67749439	gonadotropin releasing hormone 1 [Source:MGI Symbol;Acc:MGI:95789]	protein_coding	0.85642	0.319843	2.4661	0	0.236516	0.983173	5.5766	3.42428	2.73062	8.43088	2.86459	17.8972
ENSMUSG00000015829	Tnr	1	+	159523769	159931729	tenascin R [Source:MGI Symbol;Acc:MGI:99516]	protein_coding	0.250497	0.351587	0.218457	0.264131	0.158143	0.043353	0.084238	0.022482	0.107098	0.218547	0.003163	0.049806
ENSMUSG00000015837	Sqstm1	11	-	50199366	50210827	sequestosome 1 [Source:MGI Symbol;Acc:MGI:107931]	protein_coding	86.1618	70.3789	87.1921	70.3185	66.9933	62.7818	65.714	61.2158	66.1685	26.0692	22.2422	22.4993
ENSMUSG00000015839	Nfe2l2	2	-	75675513	75704641	nuclear factor, erythroid derived 2, like 2 [Source:MGI Symbol;Acc:MGI:108420]	protein_coding	63.6429	63.3596	65.8858	48.7419	40.4065	36.6184	47.5046	48.8496	45.2187	26.9257	26.4869	18.4127
ENSMUSG00000015843	Rxrg	1	+	167598384	167639623	retinoid X receptor gamma [Source:MGI Symbol;Acc:MGI:98216]	protein_coding	0.011579	0	0	0	0	0	0	0	0	0	0.122163	0
ENSMUSG00000015846	Rxra	2	+	27676440	27762957	retinoid X receptor alpha [Source:MGI Symbol;Acc:MGI:98214]	protein_coding	2.7204	2.30877	4.47622	1.29689	1.49839	1.60965	3.91852	4.50448	4.96686	2.16659	2.83185	4.5974
ENSMUSG00000015850	Adamtsl4	3	-	95676201	95687917	ADAMTS-like 4 [Source:MGI Symbol;Acc:MGI:2389008]	protein_coding	5.9906	5.27099	6.63275	1.12415	3.5353	1.34706	0.629695	1.4269	0.207215	0.804475	0.206625	0
ENSMUSG00000015852	Fcrls	3	-	87250758	87263738	Fc receptor-like S, scavenger receptor [Source:MGI Symbol;Acc:MGI:1933397]	protein_coding	0	0	0	0	0.026008	0	0	0.079085	0	0	0	0
ENSMUSG00000015854	Cd5l	3	+	87357881	87371073	CD5 antigen-like [Source:MGI Symbol;Acc:MGI:1334419]	protein_coding	0	0.055548	0	0	0	0	0	0	0	0	0	0
ENSMUSG00000015869	Prpsap1	11	-	116470845	116494202	phosphoribosyl pyrophosphate synthetase-associated protein 1 [Source:MGI Symbol;Acc:MGI:1915013]	protein_coding	31.9587	31.451	27.4044	31.5138	38.2743	47.3411	12.9244	18.0799	11.4988	11.4301	11.1815	14.6609
ENSMUSG00000015879	Fam184b	5	-	45529705	45639614	family with sequence similarity 184, member B [Source:MGI Symbol;Acc:MGI:2442958]	protein_coding	0.023854	0	0	0.026916	0	0	0.207589	0.503668	0.547988	0	0.797055	0.559786
ENSMUSG00000015880	Ncapg	5	+	45669919	45700546	non-SMC condensin I complex, subunit G [Source:MGI Symbol;Acc:MGI:1930197]	protein_coding	8.3349	9.14598	9.81215	8.4904	9.50305	17.4637	11.388	7.8184	11.1688	16.3566	15.943	14.8144
ENSMUSG00000015882	Lcorl	5	-	45697181	45857615	ligand dependent nuclear receptor corepressor-like [Source:MGI Symbol;Acc:MGI:2651932]	protein_coding	8.24973	5.42736	5.49731	8.38518	6.44787	5.17032	6.337	6.96605	7.43382	9.51328	6.90824	12.3176
ENSMUSG00000015889	Lta4h	10	+	93453411	93484875	leukotriene A4 hydrolase [Source:MGI Symbol;Acc:MGI:96836]	protein_coding	50.8855	43.9458	36.9938	146.085	132.372	154.214	28.8452	28.9935	30.2594	34.2835	29.3418	28.8255
ENSMUSG00000015890	Amdhd1	10	-	93523338	93540033	amidohydrolase domain containing 1 [Source:MGI Symbol;Acc:MGI:1919011]	protein_coding	0	0.092267	0	0.143694	0.135293	0.1569	0.115817	0	0	0	0	0
ENSMUSG00000015932	Dstn	2	+	143915320	143943324	destrin [Source:MGI Symbol;Acc:MGI:1929270]	protein_coding	353.112	388.967	322.601	656.158	660.976	673.094	110.3	113.988	117.388	104.579	93.7187	78.8966
ENSMUSG00000015937	Macroh2a1	13	-	56073619	56136361	macroH2A.1 histone [Source:MGI Symbol;Acc:MGI:1349392]	protein_coding	56.5756	43.2314	50.6921	49.9661	64.78	69.8757	74.8314	87.7852	73.0985	104.198	79.1472	76.1735
ENSMUSG00000015942	Gtf2ird2	5	+	134184019	134224355	GTF2I repeat domain containing 2 [Source:MGI Symbol;Acc:MGI:2149780]	protein_coding	10.6647	6.79899	7.68456	4.39752	4.81352	7.85653	5.74622	13.2634	7.47783	2.92001	4.1325	4.41388
ENSMUSG00000015943	Bola1	3	-	96196588	96219709	bolA-like 1 (E. coli) [Source:MGI Symbol;Acc:MGI:1916418]	protein_coding	15.6649	22.7685	23.1122	36.0787	45.397	43.6618	23.0603	47.3628	19.9658	11.6385	19.3953	24.9946
ENSMUSG00000015944	Castor2	5	+	134099711	134144343	cytosolic arginine sensor for mTORC1 subunit 2 [Source:MGI Symbol;Acc:MGI:1933384]	protein_coding	0.858323	0.456247	1.03365	0.397168	1.33463	0.504736	0.722966	1.08313	1.70642	0.532959	1.08278	0.734534
ENSMUSG00000015947	Fcgr1	3	-	96282909	96293969	Fc receptor, IgG, high affinity I [Source:MGI Symbol;Acc:MGI:95498]	protein_coding	0.127799	0.273269	0.099158	0.164561	0	0	0	0	0	0	0.298681	0
ENSMUSG00000015950	Ncf1	5	-	134220053	134229625	neutrophil cytosolic factor 1 [Source:MGI Symbol;Acc:MGI:97283]	protein_coding	245.658	202.745	234.197	161.452	122.236	144.021	155.317	145.11	134.212	45.1335	73.6997	45.4274
ENSMUSG00000015957	Wnt11	7	+	98835112	98855195	wingless-type MMTV integration site family, member 11 [Source:MGI Symbol;Acc:MGI:101948]	protein_coding	0	0	0	0	0	0.052075	0	0.182834	0	0	0	0
ENSMUSG00000015961	Adss	1	-	177762962	177796511	adenylosuccinate synthetase, non muscle [Source:MGI Symbol;Acc:MGI:87948]	protein_coding	33.7582	25.0341	25.2517	27.9969	28.7086	32.1061	14.4129	16.0702	19.3511	10.2283	12.1644	13.2705
ENSMUSG00000015962	1700016C15Rik	1	+	177729814	177753324	RIKEN cDNA 1700016C15 gene [Source:MGI Symbol;Acc:MGI:1916678]	protein_coding	0	0.230554	0	0	0.255152	0	0	0	0	0	0	0
ENSMUSG00000015966	Il17rb	14	-	29996135	30008896	interleukin 17 receptor B [Source:MGI Symbol;Acc:MGI:1355292]	protein_coding	0	0	0.170764	0	0	0	0	0.0724	0	0	0	0
ENSMUSG00000015968	Cacna1d	14	-	30039939	30491455	calcium channel, voltage-dependent, L type, alpha 1D subunit [Source:MGI Symbol;Acc:MGI:88293]	protein_coding	0.714728	0.381428	0.34381	0.95334	0.002312	0.636163	0.693704	0.682152	2.11781	3.47326	0.497409	5.07967
ENSMUSG00000015970	Chdh	14	+	30009023	30040527	choline dehydrogenase [Source:MGI Symbol;Acc:MGI:1860776]	protein_coding	0.073522	0.052649	0.032924	0	0.042365	0.151124	0.065727	0	0.102739	0.57408	0.369432	0.306535
ENSMUSG00000015971	Actr8	14	+	29978337	30006354	ARP8 actin-related protein 8 [Source:MGI Symbol;Acc:MGI:1860775]	protein_coding	15.9456	7.70002	9.33781	8.07337	10.2716	16.2078	10.2247	8.75585	6.81009	8.75598	10.4191	15.6468
ENSMUSG00000015980	Lrrc27	7	+	139212988	139242979	leucine rich repeat containing 27 [Source:MGI Symbol;Acc:MGI:1923862]	protein_coding	9.06087	7.40054	11.4598	4.57603	6.41557	4.67121	4.06813	2.7474	2.8319	2.13863	5.67513	0
ENSMUSG00000015981	Stk32c	7	-	139103638	139213307	serine/threonine kinase 32C [Source:MGI Symbol;Acc:MGI:2385336]	protein_coding	0	0	0	0	0	0	0	0	0.180686	0	0	0
ENSMUSG00000015994	Fnta	8	-	25998722	26015650	farnesyltransferase, CAAX box, alpha [Source:MGI Symbol;Acc:MGI:104683]	protein_coding	56.3046	42.4464	39.8566	67.674	54.659	53.1098	23.6359	28.1394	27.1243	10.0501	15.6718	10.6972
ENSMUSG00000016018	Mtrex	13	-	112867418	112927398	Mtr4 exosome RNA helicase [Source:MGI Symbol;Acc:MGI:1919448]	protein_coding	10.8297	9.78239	8.40944	9.14315	9.70767	9.4785	11.7386	7.6598	12.1802	5.56543	12.8832	8.82109
ENSMUSG00000016024	Lbp	2	+	158306493	158332852	lipopolysaccharide binding protein [Source:MGI Symbol;Acc:MGI:1098776]	protein_coding	3.73098	4.47119	4.30149	16.2191	14.6854	11.1322	2.86673	2.5717	3.28792	2.45436	2.61215	2.70127
ENSMUSG00000016028	Celsr1	15	-	85898929	86034203	cadherin, EGF LAG seven-pass G-type receptor 1 [Source:MGI Symbol;Acc:MGI:1100883]	protein_coding	0.019451	0.006089	0.019229	0.089202	0.093776	0.051629	0.159602	0.041253	0.046126	0.070516	0	0.081719
ENSMUSG00000016087	Fli1	9	-	32422204	32542861	Friend leukemia integration 1 [Source:MGI Symbol;Acc:MGI:95554]	protein_coding	23.8645	20.0605	19.3445	24.7733	21.9573	24.8476	35.2119	31.1428	31.2634	31.523	29.1835	25.6463
ENSMUSG00000016128	Stard13	5	-	151037510	151233836	StAR-related lipid transfer (START) domain containing 13 [Source:MGI Symbol;Acc:MGI:2385331]	protein_coding	0	0.012111	0	0	0.028431	0	0.160947	0.094815	0.058986	0.782133	0.150452	0.70009
ENSMUSG00000016150	Tenm1	X	-	42527866	43429126	teneurin transmembrane protein 1 [Source:MGI Symbol;Acc:MGI:1345185]	protein_coding	0	0.002185	0	0	0.062285	0	0.107251	0.251195	0.143258	1.03277	0.376652	3.80616
ENSMUSG00000016179	Camk1g	1	-	193346346	193370298	calcium/calmodulin-dependent protein kinase I gamma [Source:MGI Symbol;Acc:MGI:2388073]	protein_coding	0	0	0	0	0	0	0	0.123975	0	0	0.048013	0
ENSMUSG00000016181	Utp25	1	-	193091104	193130272	UTP25 small subunit processome component [Source:MGI Symbol;Acc:MGI:2138080]	protein_coding	1.33293	0.981676	1.58841	2.80534	1.75201	2.88539	5.97577	3.82628	3.66014	3.50938	1.59791	3.87315
ENSMUSG00000016194	Hsd11b1	1	-	193221634	193264075	hydroxysteroid 11-beta dehydrogenase 1 [Source:MGI Symbol;Acc:MGI:103562]	protein_coding	155.453	142.12	130.516	101.192	120.8	100.879	34.1033	27.4111	21.4149	5.04467	3.41579	6.90983
ENSMUSG00000016200	Syt14	1	-	192891233	193035775	synaptotagmin XIV [Source:MGI Symbol;Acc:MGI:2444490]	protein_coding	0	0	0	0	0	0	0	0.028647	0.037484	0.044968	0	0.030635
ENSMUSG00000016206	H2-M3	17	+	37270220	37274484	histocompatibility 2, M region locus 3 [Source:MGI Symbol;Acc:MGI:95915]	protein_coding	9.18855	6.98299	10.0542	12.0313	10.4111	14.4317	6.39341	5.38983	3.30029	8.95762	3.75084	3.17559
ENSMUSG00000016239	Lonrf3	X	+	36328353	36362341	LON peptidase N-terminal domain and ring finger 3 [Source:MGI Symbol;Acc:MGI:1921615]	protein_coding	4.81875	3.52155	4.15451	3.29165	2.07859	2.45104	10.1644	7.54436	6.57124	3.12198	5.84603	5.0285
ENSMUSG00000016252	Atp5e	2	-	174461072	174464105	ATP synthase, H+ transporting, mitochondrial F1 complex, epsilon subunit [Source:MGI Symbol;Acc:MGI:1855697]	protein_coding	300.686	376.995	434.444	385.095	522.372	513.656	502.337	498.106	462.864	686.722	658.099	523.761
ENSMUSG00000016253	Nelfcd	2	+	174415804	174427502	negative elongation factor complex member C/D, Th1l [Source:MGI Symbol;Acc:MGI:1926424]	protein_coding	15.6457	8.18981	11.5769	16.1686	14.7148	10.5324	17.7254	14.9273	14.1997	12.839	17.4552	29.3005
ENSMUSG00000016255	Tubb1	2	+	174450695	174457882	tubulin, beta 1 class VI [Source:MGI Symbol;Acc:MGI:107814]	protein_coding	0	0	0	0	0	0	0	0	0.347573	0	0.302935	0
ENSMUSG00000016256	Ctsz	2	-	174427493	174439039	cathepsin Z [Source:MGI Symbol;Acc:MGI:1891190]	protein_coding	202.745	201.364	205.791	286.259	236.079	231.421	152.077	172.559	163.05	98.6111	142.069	112.222
ENSMUSG00000016257	Prelid3b	2	-	174465067	174473081	PRELI domain containing 3B [Source:MGI Symbol;Acc:MGI:1913640]	protein_coding	46.6633	46.7693	37.166	69.3737	52.2659	56.4114	20.7938	21.3021	18.2182	18.2263	19.5444	8.70499
ENSMUSG00000016262	Sertad4	1	-	192844488	192855756	SERTA domain containing 4 [Source:MGI Symbol;Acc:MGI:2443496]	protein_coding	0	0	0	0	0	0	0	0.169383	0.055145	0	0	0.583557
ENSMUSG00000016283	H2-M2	17	-	37480851	37483552	histocompatibility 2, M region locus 2 [Source:MGI Symbol;Acc:MGI:95914]	protein_coding	0	0	0	0	0	0	0	0.4271	0.656985	0.5683	0	0.506194
ENSMUSG00000016308	Ube2a	X	+	36873900	36884222	ubiquitin-conjugating enzyme E2A [Source:MGI Symbol;Acc:MGI:102959]	protein_coding	87.2399	61.6429	78.1091	86.419	111.561	80.6931	23.3639	22.3061	20.6211	28.2751	14.2714	16.8888
ENSMUSG00000016319	Slc25a5	X	+	36795651	36798807	solute carrier family 25 (mitochondrial carrier, adenine nucleotide translocator), member 5 [Source:MGI Symbol;Acc:MGI:1353496]	protein_coding	818.436	828.504	732.53	1459	1511.73	1348.76	322.52	319.731	278.703	193.112	243.165	176.563
ENSMUSG00000016327	Atp1b4	X	+	38316184	38336769	ATPase, (Na+)/K+ transporting, beta 4 polypeptide [Source:MGI Symbol;Acc:MGI:1915071]	protein_coding	0	0.020404	0	0	0	0	0	0.168924	0	0	0	0
ENSMUSG00000016344	Ppdpf	2	+	181187247	181188771	pancreatic progenitor cell differentiation and proliferation factor [Source:MGI Symbol;Acc:MGI:1913746]	protein_coding	39.8659	47.9536	47.138	37.2764	56.0505	45.4124	20.2076	23.7971	17.7846	2.08319	8.7608	4.2089
ENSMUSG00000016346	Kcnq2	2	-	181075579	181135300	potassium voltage-gated channel, subfamily Q, member 2 [Source:MGI Symbol;Acc:MGI:1309503]	protein_coding	0.029692	0.237015	0.182146	0	0	0	0.029961	0.074312	0.18735	0.134951	0	0
ENSMUSG00000016349	Eef1a2	2	-	181147653	181157014	eukaryotic translation elongation factor 1 alpha 2 [Source:MGI Symbol;Acc:MGI:1096317]	protein_coding	0	0	0.984235	0	0	0	0	1.28762	1.74321	0	0.097229	0
ENSMUSG00000016356	Col20a1	2	+	180986535	181018363	collagen, type XX, alpha 1 [Source:MGI Symbol;Acc:MGI:1920618]	protein_coding	0.642726	1.05751	0.459494	0.068112	0.184376	0.734728	0.741709	0.87158	0.950363	0.601686	0.317374	0
ENSMUSG00000016382	Pls3	X	-	75785654	75875182	plastin 3 (T-isoform) [Source:MGI Symbol;Acc:MGI:104807]	protein_coding	0.26296	0.016101	0	0	0	0	0	0.182344	0.485893	0	0.365223	0.227502
ENSMUSG00000016386	Mpped2	2	+	106693269	106868356	metallophosphoesterase domain containing 2 [Source:MGI Symbol;Acc:MGI:1924265]	protein_coding	0	0	0	0	0.022141	0	0.3802	1.32638	2.18827	1.05807	4.20672	4.42661
ENSMUSG00000016409	Nkap	X	+	37126795	37150746	NFKB activating protein [Source:MGI Symbol;Acc:MGI:1914300]	protein_coding	7.47659	6.40249	6.52407	8.02348	7.22382	6.73347	8.98316	7.40784	5.72641	8.69769	9.18514	10.066
ENSMUSG00000016427	Ndufa1	X	-	37187588	37191163	NADH:ubiquinone oxidoreductase subunit A1 [Source:MGI Symbol;Acc:MGI:1929511]	protein_coding	202.248	261.714	255.617	231.819	294.063	328.403	251.869	277.126	242.142	225.481	191.447	138.03
ENSMUSG00000016458	Wt1	2	+	105126529	105173616	Wilms tumor 1 homolog [Source:MGI Symbol;Acc:MGI:98968]	protein_coding	0	0	0	0	0	0	0	0.438064	0.169052	0	0.194743	0.185476
ENSMUSG00000016477	E2f3	13	-	29906575	29986063	E2F transcription factor 3 [Source:MGI Symbol;Acc:MGI:1096340]	protein_coding	3.73655	2.9375	2.93012	2.12603	2.26228	3.11323	4.20827	3.35524	2.7216	2.91233	2.56288	2.49698
ENSMUSG00000016481	Cr1l	1	-	195097382	195131586	complement component (3b/4b) receptor 1-like [Source:MGI Symbol;Acc:MGI:88513]	protein_coding	64.2064	60.3768	47.3831	62.2571	41.6279	49.3105	26.8853	25.4523	20.0459	12.1609	11.4219	14.7649
ENSMUSG00000016487	Ppfibp1	6	+	146888487	147032025	PTPRF interacting protein, binding protein 1 (liprin beta 1) [Source:MGI Symbol;Acc:MGI:1914783]	protein_coding	9.1757	7.36629	5.8971	8.33706	3.98539	7.41624	6.53543	8.15318	6.33923	3.86249	5.71669	5.87055
ENSMUSG00000016493	Cd46	1	-	195036826	195092249	CD46 antigen, complement regulatory protein [Source:MGI Symbol;Acc:MGI:1203290]	protein_coding	0.778305	0.269967	0.253953	1.66991	0.3225	0.510725	0.109781	0.185992	1.26001	0.434845	0.038143	3.05568
ENSMUSG00000016494	Cd34	1	+	194938819	194961279	CD34 antigen [Source:MGI Symbol;Acc:MGI:88329]	protein_coding	0	0.127687	0.178609	0.033168	0.014411	0.121023	0.203509	0.400079	0.934992	0.197226	0.220373	4.40863
ENSMUSG00000016495	Plgrkt	19	-	29348599	29367390	plasminogen receptor, C-terminal lysine transmembrane protein [Source:MGI Symbol;Acc:MGI:1915009]	protein_coding	115.249	132.055	123.867	143.037	96.5168	116.15	47.1769	55.7176	34.0776	28.9644	28.4309	14.8897
ENSMUSG00000016496	Cd274	19	+	29367455	29388095	CD274 antigen [Source:MGI Symbol;Acc:MGI:1926446]	protein_coding	9.17386	5.48183	6.01954	7.23454	4.37523	3.53031	3.59912	2.97636	3.7907	4.51408	0	0.931027
ENSMUSG00000016498	Pdcd1lg2	19	+	29410919	29471161	programmed cell death 1 ligand 2 [Source:MGI Symbol;Acc:MGI:1930125]	protein_coding	1.2575	2.73145	1.83356	0.934648	1.27581	0	0	0.262632	1.16478	0	0	0
ENSMUSG00000016503	Gtf3a	5	+	146948657	146955614	general transcription factor III A [Source:MGI Symbol;Acc:MGI:1913846]	protein_coding	39.7603	38.3035	46.5537	46.0357	37.5726	42.6197	27.432	30.7453	22.6524	13.4372	14.2049	12.6253
ENSMUSG00000016510	Mtif3	5	-	146951573	146963800	mitochondrial translational initiation factor 3 [Source:MGI Symbol;Acc:MGI:1923616]	protein_coding	9.01336	7.23549	5.64026	4.89555	9.69786	8.40425	3.22326	2.9735	2.70748	4.29676	1.98603	2.13937
ENSMUSG00000016520	Lnx2	5	-	147016655	147076586	ligand of numb-protein X 2 [Source:MGI Symbol;Acc:MGI:2155959]	protein_coding	1.14318	1.03697	0.824187	1.20102	1.86074	0.748195	0.786589	0.98522	1.04703	0.320297	0.28766	1.6338
ENSMUSG00000016524	Il19	1	-	130932656	130940115	interleukin 19 [Source:MGI Symbol;Acc:MGI:1890472]	protein_coding	0	0	0	0.231833	0.223576	0	0	0	0.813015	0	0	0
ENSMUSG00000016526	Dyrk3	1	-	131127455	131138340	dual-specificity tyrosine-(Y)-phosphorylation regulated kinase 3 [Source:MGI Symbol;Acc:MGI:1330300]	protein_coding	3.38015	2.80737	1.90189	3.55297	0.694829	0.516679	1.39505	0.949636	1.76599	1.06833	0.454386	0.801022
ENSMUSG00000016528	Mapkapk2	1	-	131053700	131097826	MAP kinase-activated protein kinase 2 [Source:MGI Symbol;Acc:MGI:109298]	protein_coding	57.6145	51.3723	61.7042	58.2919	81.8918	64.9931	62.5649	61.04	61.7205	51.5954	56.1433	47.4024
ENSMUSG00000016529	Il10	1	+	131019845	131024974	interleukin 10 [Source:MGI Symbol;Acc:MGI:96537]	protein_coding	0	0	0.105659	0.262499	0	0	0	0	0	0	0	0
ENSMUSG00000016534	Lamp2	X	-	38401357	38456454	lysosomal-associated membrane protein 2 [Source:MGI Symbol;Acc:MGI:96748]	protein_coding	113.098	116.701	84.2804	90.7231	108.154	88.5035	34.7746	28.1391	29.9075	24.4915	21.4357	16.2935
ENSMUSG00000016541	Atxn10	15	+	85336245	85463212	ataxin 10 [Source:MGI Symbol;Acc:MGI:1859293]	protein_coding	152.003	148.966	140.481	157.634	128.215	149.357	43.928	50.5675	56.6879	36.1924	25.1237	28.837
ENSMUSG00000016552	Foxred2	15	-	77940522	77956722	FAD-dependent oxidoreductase domain containing 2 [Source:MGI Symbol;Acc:MGI:106315]	protein_coding	1.28706	1.75967	1.36146	0.381485	0.283788	0.330385	3.04634	3.08441	3.27831	2.85371	1.77349	2.84087
ENSMUSG00000016554	Eif3d	15	-	77958998	77970813	eukaryotic translation initiation factor 3, subunit D [Source:MGI Symbol;Acc:MGI:1933181]	protein_coding	56.1841	52.6646	57.456	102.555	93.2889	55.8038	62.0701	70.2525	61.0743	54.723	72.3028	49.1964
ENSMUSG00000016559	H3f3b	11	-	116021912	116027962	H3.3 histone B [Source:MGI Symbol;Acc:MGI:1101768]	protein_coding	1119.22	1042.81	925.861	962.903	1040.17	1344.96	641.613	651.11	440.166	311.323	323.965	257.863
ENSMUSG00000016619	Nup50	15	+	84923411	84942963	nucleoporin 50 [Source:MGI Symbol;Acc:MGI:1351502]	protein_coding	16.3097	12.4972	11.8459	16.4589	16.6878	15.3074	17.4455	21.9711	20.5162	11.3385	15.6776	17.7708
ENSMUSG00000016624	Phf21b	15	-	84785381	84856049	PHD finger protein 21B [Source:MGI Symbol;Acc:MGI:2443812]	protein_coding	0.276413	0.349896	0.288591	0.365852	0.93923	0.303241	0.699048	1.02934	2.18862	0.934581	1.4531	0.598393
ENSMUSG00000016626	Nlrp14	7	+	107166990	107198102	NLR family, pyrin domain containing 14 [Source:MGI Symbol;Acc:MGI:1924108]	protein_coding	0	0	0	0.014176	0	0	0	0	0	0	0	2.79298
ENSMUSG00000016637	Ift27	15	-	78159463	78174107	intraflagellar transport 27 [Source:MGI Symbol;Acc:MGI:1914292]	protein_coding	21.3519	27.7931	24.8685	29.4905	33.3155	29.1554	19.3486	21.2238	13.8339	10.3703	10.1218	15.2318
ENSMUSG00000016664	Pacsin2	15	-	83375607	83464606	protein kinase C and casein kinase substrate in neurons 2 [Source:MGI Symbol;Acc:MGI:1345153]	protein_coding	51.2947	34.0948	38.4155	37.3475	32.0014	25.0684	22.9549	24.9964	20.2784	13.8731	7.33993	8.33318
ENSMUSG00000016756	Cmah	13	+	24327404	24477377	cytidine monophospho-N-acetylneuraminic acid hydroxylase [Source:MGI Symbol;Acc:MGI:103227]	protein_coding	0.51423	0.447108	0.553857	0.417097	0.86689	0.195278	0.149055	0.35741	0.146327	0.059845	0	0.128012
ENSMUSG00000016757	Ttll12	15	-	83575090	83595157	tubulin tyrosine ligase-like family, member 12 [Source:MGI Symbol;Acc:MGI:3039573]	protein_coding	1.24815	1.86896	2.20301	3.46827	3.77029	4.90607	3.35902	3.14632	3.17498	6.72097	2.68888	5.9941
ENSMUSG00000016758	Bik	15	+	83526862	83544634	BCL2-interacting killer [Source:MGI Symbol;Acc:MGI:1206591]	protein_coding	0	0	0	0	0	0	0	0	0	0	2.88405	0
ENSMUSG00000016763	Scube1	15	-	83604999	83725021	signal peptide, CUB domain, EGF-like 1 [Source:MGI Symbol;Acc:MGI:1890616]	protein_coding	0	0	0	0.012363	0	0.241374	0.031516	0.11225	0.270835	0.086763	0.106985	1.265
ENSMUSG00000016831	Tox4	14	+	52279146	52296401	TOX high mobility group box family member 4 [Source:MGI Symbol;Acc:MGI:1915389]	protein_coding	9.10744	9.03389	6.97257	8.08942	8.23523	5.57823	11.3544	13.1377	8.31775	6.01091	10.5913	5.03831
ENSMUSG00000016833	Mrps18c	5	+	100798627	100804471	mitochondrial ribosomal protein S18C [Source:MGI Symbol;Acc:MGI:1915985]	protein_coding	125.682	184.987	187.149	174.586	204.112	218.684	103.262	106.151	89.2723	112.679	64.701	57.9047
ENSMUSG00000016918	Sulf1	1	+	12692277	12861192	sulfatase 1 [Source:MGI Symbol;Acc:MGI:2138563]	protein_coding	0	0	0	0	0	0	0	0.215583	0.08568	0	0	5.14595
ENSMUSG00000016921	Srsf6	2	+	162931528	162937121	serine and arginine-rich splicing factor 6 [Source:MGI Symbol;Acc:MGI:1915246]	protein_coding	51.7082	48.4787	45.0446	77.8021	69.3552	72.4119	34.6545	32.8594	26.6835	21.3859	24.1477	23.7548
ENSMUSG00000016933	Plcg1	2	+	160731300	160775760	phospholipase C, gamma 1 [Source:MGI Symbol;Acc:MGI:97615]	protein_coding	0.492582	0.110385	1.43424	0.529207	0.813665	0.865785	0.900401	0.718208	1.27051	0.192136	1.48508	0.502527
ENSMUSG00000016940	Kctd2	11	+	115420128	115431274	potassium channel tetramerisation domain containing 2 [Source:MGI Symbol;Acc:MGI:1917632]	protein_coding	6.28957	4.77864	7.44248	4.14203	7.28739	7.66005	5.35441	6.31616	2.28297	0.867463	2.72559	2.21324
ENSMUSG00000016942	Tmprss6	15	-	78439667	78468634	transmembrane serine protease 6 [Source:MGI Symbol;Acc:MGI:1919003]	protein_coding	0	0.168567	0.198395	0.043415	0.073668	0	0	0	0	0	0	0
ENSMUSG00000016946	Kctd5	17	-	24047734	24073485	potassium channel tetramerisation domain containing 5 [Source:MGI Symbol;Acc:MGI:1916509]	protein_coding	8.27382	7.32043	8.38005	14.8239	11.5529	8.12596	2.58115	1.73866	3.24565	2.14831	3.58623	2.4376
ENSMUSG00000016982	Pom121l2	13	+	21981194	21988734	POM121 membrane glycoprotein-like 2 (rat) [Source:MGI Symbol;Acc:MGI:2684870]	protein_coding	0	0	0	0	0	0.024467	0	0	0.036894	0.297125	0.109434	0
ENSMUSG00000016984	Etaa1	11	-	17938756	17953875	Ewing tumor-associated antigen 1 [Source:MGI Symbol;Acc:MGI:1915395]	protein_coding	2.48411	1.55598	1.96166	3.40871	1.72436	2.42139	2.58154	2.73434	1.87704	4.25572	1.82108	4.55391
ENSMUSG00000016995	Matn4	2	-	164389393	164405160	matrilin 4 [Source:MGI Symbol;Acc:MGI:1328314]	protein_coding	0	0	0	0	0	0.013989	0.067876	0.176095	0.097955	0	0	0
ENSMUSG00000016998	Svs4	2	-	164275952	164278459	seminal vesicle secretory protein 4 [Source:MGI Symbol;Acc:MGI:98450]	protein_coding	0	0	0	0	0	0	0	0	0	0	0	0
ENSMUSG00000017000	Svs6	2	+	164316751	164318453	seminal vesicle secretory protein 6 [Source:MGI Symbol;Acc:MGI:106178]	protein_coding	0	0	0	0	0	0	0	0	0	0	0	0
ENSMUSG00000017002	Slpi	2	-	164354070	164389095	secretory leukocyte peptidase inhibitor [Source:MGI Symbol;Acc:MGI:109297]	protein_coding	650.992	1023.88	914.623	992.013	973.777	970.732	325.914	389.389	341.031	184.188	181.926	104.767
ENSMUSG00000017003	Svs3a	2	+	164289268	164291500	seminal vesicle secretory protein 3A [Source:MGI Symbol;Acc:MGI:1927635]	protein_coding	0	0	0	0	0	0	0	0	0	0	0	0
ENSMUSG00000017004	Svs5	2	+	164332740	164334396	seminal vesicle secretory protein 5 [Source:MGI Symbol;Acc:MGI:98453]	protein_coding	0	0	0	0	0	0	0	0	0	0	0	0
ENSMUSG00000017007	Rbpjl	2	+	164403141	164415448	recombination signal binding protein for immunoglobulin kappa J region-like [Source:MGI Symbol;Acc:MGI:1196616]	protein_coding	0	0	0	0	0	0.034965	0	0	0	0	0	0
ENSMUSG00000017009	Sdc4	2	-	164424247	164443887	syndecan 4 [Source:MGI Symbol;Acc:MGI:1349164]	protein_coding	0	0.030813	0.249668	0	0	0.765934	0.163403	0.244068	0.411699	0.245836	3.23965	0.802984
ENSMUSG00000017049	Ccdc70	8	+	21969775	21974041	coiled-coil domain containing 70 [Source:MGI Symbol;Acc:MGI:1915179]	protein_coding	0	0	0	0	0	0	0	0	0	0	0	0
ENSMUSG00000017057	Il13ra1	X	+	36112110	36171259	interleukin 13 receptor, alpha 1 [Source:MGI Symbol;Acc:MGI:105052]	protein_coding	33.677	30.8865	24.5745	15.2904	10.7814	11.6887	5.56895	5.68904	6.12261	1.85256	3.70372	1.16988
ENSMUSG00000017064	Prl5a1	13	+	28142484	28151611	prolactin family 5, subfamily a, member 1 [Source:MGI Symbol;Acc:MGI:106332]	protein_coding	0	0	0	0	0.049526	0	0	0.352457	0	0	0.329986	3.43678
ENSMUSG00000017119	Nbr1	11	+	101552149	101581951	NBR1, autophagy cargo receptor [Source:MGI Symbol;Acc:MGI:108498]	protein_coding	8.84932	9.66033	8.53655	6.64292	2.30171	9.90725	6.47387	6.16577	4.9673	2.71549	3.45072	3.05863
ENSMUSG00000017132	Cyth1	11	-	118132019	118248592	cytohesin 1 [Source:MGI Symbol;Acc:MGI:1334257]	protein_coding	10.0132	8.47956	10.0209	10.0633	10.0272	5.90585	7.35145	6.18752	8.05681	4.73646	4.71704	2.88047
ENSMUSG00000017144	Rnd3	2	-	51130438	51149111	Rho family GTPase 3 [Source:MGI Symbol;Acc:MGI:1921444]	protein_coding	6.79011	5.92513	5.27215	6.68999	2.72404	3.46938	8.48056	2.56798	8.93829	5.67686	9.72464	6.36583
ENSMUSG00000017146	Brca1	11	-	101488764	101551955	breast cancer 1, early onset [Source:MGI Symbol;Acc:MGI:104537]	protein_coding	0.900466	0.535116	0.593835	0.587077	1.61704	2.20771	1.03161	1.83656	1.71333	1.14716	1.45307	0.773
ENSMUSG00000017165	Gast	11	+	100334407	100336996	gastrin [Source:MGI Symbol;Acc:MGI:104768]	protein_coding	0	0	0	0	0	0	0	0	0	0	0	0
ENSMUSG00000017167	Cntnap1	11	+	101170523	101190724	contactin associated protein-like 1 [Source:MGI Symbol;Acc:MGI:1858201]	protein_coding	0	0.043226	0.030854	0.013895	0.024068	0.015786	0.136012	0.452662	0.45823	0.25136	0.373741	0
ENSMUSG00000017176	Nt5c3b	11	-	100422321	100441808	5'-nucleotidase, cytosolic IIIB [Source:MGI Symbol;Acc:MGI:1915356]	protein_coding	0.313729	0.196433	0.527735	5.83043	2.18065	1.76235	0.956322	0.564535	0.978232	1.53101	1.205	0.952201
ENSMUSG00000017188	Coa3	11	-	101277968	101279114	cytochrome C oxidase assembly factor 3 [Source:MGI Symbol;Acc:MGI:1098757]	protein_coding	241.945	292.125	262.321	239.167	231.517	241.429	76.8495	82.9422	75.6282	87.791	82.4259	56.7435
ENSMUSG00000017195	Zpbp2	11	+	98551097	98558665	zona pellucida binding protein 2 [Source:MGI Symbol;Acc:MGI:1916626]	protein_coding	0	0	0	0	0	0	0	0.216532	0.397599	0	0.415801	2.42798
ENSMUSG00000017204	Gsdma	11	+	98664351	98677708	gasdermin A [Source:MGI Symbol;Acc:MGI:1889509]	protein_coding	0	0	0	0	0	0	0.129142	0.640887	0.437656	0.88875	0.57796	0.467969
ENSMUSG00000017210	Med24	11	-	98704591	98729435	mediator complex subunit 24 [Source:MGI Symbol;Acc:MGI:1344385]	protein_coding	3.04252	2.00249	3.00422	7.13599	6.0474	7.34557	4.79534	5.32672	5.06979	5.35492	4.43123	3.38858
ENSMUSG00000017211	Gsdma2	11	+	98646759	98657964	gasdermin A2 [Source:MGI Symbol;Acc:MGI:1921490]	protein_coding	0	0	0.334683	0	0	0	0	0.724027	1.50023	1.66359	0.346609	0
ENSMUSG00000017221	Psmd3	11	+	98682554	98695979	proteasome (prosome, macropain) 26S subunit, non-ATPase, 3 [Source:MGI Symbol;Acc:MGI:98858]	protein_coding	14.6506	13.0789	15.7992	41.9212	22.6358	42.8615	24.618	24.5265	20.3383	22.1277	27.4796	20.068
ENSMUSG00000017264	Exosc10	4	+	148558429	148582401	exosome component 10 [Source:MGI Symbol;Acc:MGI:1355322]	protein_coding	10.3319	8.68852	7.42057	14.5908	17.0766	9.1548	18.8508	16.6466	17.0912	4.60388	10.201	15.7018
ENSMUSG00000017286	Glod4	11	-	76120987	76243725	glyoxalase domain containing 4 [Source:MGI Symbol;Acc:MGI:1914451]	protein_coding	25.5909	24.2148	20.2497	23.0344	25.9494	22.3431	13.1099	11.7282	16.0562	13.2413	12.5874	13.0034
ENSMUSG00000017288	Vps53	11	-	76046226	76179647	VPS53 GARP complex subunit [Source:MGI Symbol;Acc:MGI:1915549]	protein_coding	11.0411	14.6163	19.8206	13.4588	16.5318	18.3212	15.581	15.6696	12.8364	9.931	8.50709	13.7152
ENSMUSG00000017291	Taok1	11	-	77529162	77607815	TAO kinase 1 [Source:MGI Symbol;Acc:MGI:1914490]	protein_coding	7.43514	5.57335	5.01852	4.59098	4.57746	4.37597	8.20832	8.61038	8.51928	7.42586	6.79617	8.85274
ENSMUSG00000017299	Dnttip1	2	+	164745983	164768607	deoxynucleotidyltransferase, terminal, interacting protein 1 [Source:MGI Symbol;Acc:MGI:1923483]	protein_coding	24.3168	21.6993	27.5448	21.5971	25.8973	24.3995	9.84267	12.2448	10.9521	3.99843	5.60889	3.83318
ENSMUSG00000017300	Tnnc2	2	-	164777161	164779967	troponin C2, fast [Source:MGI Symbol;Acc:MGI:98780]	protein_coding	0	0	0.126618	0	0	0	0	0.936439	0	0	0	0
ENSMUSG00000017307	Acot8	2	-	164792765	164804882	acyl-CoA thioesterase 8 [Source:MGI Symbol;Acc:MGI:2158201]	protein_coding	18.8144	22.1032	16.7688	17.9382	10.9452	14.9659	10.3604	17.2588	13.187	3.38112	2.21158	0
ENSMUSG00000017309	Cd300lg	11	+	102041509	102055620	CD300 molecule like family member G [Source:MGI Symbol;Acc:MGI:1289168]	protein_coding	0.876514	0.198025	0.294493	1.45169	0.076395	0	1.52208	0.906823	1.09789	0.610503	0.216556	2.17645
ENSMUSG00000017310	Spint4	2	+	164698501	164702453	serine protease inhibitor, Kunitz type 4 [Source:MGI Symbol;Acc:MGI:1925489]	protein_coding	0	0	0	0	0	0	0	0	0	0	0	0
ENSMUSG00000017311	Pyy	11	-	102106676	102107832	peptide YY [Source:MGI Symbol;Acc:MGI:99924]	protein_coding	0	0	0	0	0	0	0	0	0	0	0	0
ENSMUSG00000017314	Mpp2	11	-	102057015	102088515	membrane protein, palmitoylated 2 (MAGUK p55 subfamily member 2) [Source:MGI Symbol;Acc:MGI:1858257]	protein_coding	0	0	0.018671	0.148378	0	0	0	0.162076	0.330941	0.101641	0	0
ENSMUSG00000017316	Ppy	11	-	102099930	102101319	pancreatic polypeptide [Source:MGI Symbol;Acc:MGI:97753]	protein_coding	0	0	0	0	0	0	0	0	0	0	0	0
ENSMUSG00000017344	Vtn	11	+	78499091	78502324	vitronectin [Source:MGI Symbol;Acc:MGI:98940]	protein_coding	0	1.98803	0.901546	0	0	0	0	0.401601	0.140888	0	0	0
ENSMUSG00000017376	Nlk	11	-	78567168	78697373	nemo like kinase [Source:MGI Symbol;Acc:MGI:1201387]	protein_coding	5.65352	3.64033	3.39594	5.07083	2.30649	3.10856	4.99773	4.91046	3.28898	5.44504	4.71152	3.94968
ENSMUSG00000017386	Traf4	11	-	78158499	78165589	TNF receptor associated factor 4 [Source:MGI Symbol;Acc:MGI:1202880]	protein_coding	0.283046	0.028263	0.050631	0.476987	0.067117	0	0.051728	0.193305	0.54777	0.112667	0.743594	0
ENSMUSG00000017390	Aldoc	11	+	78322968	78327781	aldolase C, fructose-bisphosphate [Source:MGI Symbol;Acc:MGI:101863]	protein_coding	18.8296	15.9257	17.4107	8.60157	10.992	3.56004	3.8519	12.3135	15.1684	0.805967	2.57029	2.00715
ENSMUSG00000017400	Stac2	11	-	98036623	98053462	SH3 and cysteine rich domain 2 [Source:MGI Symbol;Acc:MGI:2144518]	protein_coding	0	0	0.19729	0	0	0	1.30218	0.304865	1.27792	0	0	2.49597
ENSMUSG00000017404	Rpl19	11	+	98026710	98030492	ribosomal protein L19 [Source:MGI Symbol;Acc:MGI:98020]	protein_coding	802.166	1046.47	1169.42	1133.6	1183.59	1137.42	1521.73	1833.38	1664.58	1371.02	1392.14	1157.07
ENSMUSG00000017405	Nek8	11	-	78166106	78176675	NIMA (never in mitosis gene a)-related expressed kinase 8 [Source:MGI Symbol;Acc:MGI:1890646]	protein_coding	0.703385	0.234246	3.01585	0.128458	2.11155	0.514365	5.5071	2.48578	4.28607	0	1.72274	0.514452
ENSMUSG00000017412	Cacnb4	2	-	52428320	52676831	calcium channel, voltage-dependent, beta 4 subunit [Source:MGI Symbol;Acc:MGI:103301]	protein_coding	0.016188	0.019163	0.046335	0	0	0	0.080577	0.055729	0.25894	0.58877	0.153175	1.55533
ENSMUSG00000017417	Plxdc1	11	-	97923238	97986444	plexin domain containing 1 [Source:MGI Symbol;Acc:MGI:1919574]	protein_coding	0.200675	0.164751	0.448246	0.044126	0.49705	0.076227	0.076999	0.450545	0.107397	1.42289	0	0
ENSMUSG00000017418	Arl5b	2	+	15049395	15082456	ADP-ribosylation factor-like 5B [Source:MGI Symbol;Acc:MGI:1923119]	protein_coding	2.18725	1.58632	1.80293	1.84039	1.29742	5.89222	2.32743	1.91594	2.90606	1.50146	3.26687	1.11286
ENSMUSG00000017421	Zfp207	11	+	80383279	80405733	zinc finger protein 207 [Source:MGI Symbol;Acc:MGI:1340045]	protein_coding	76.223	64.5073	53.1813	68.6682	74.4384	75.8538	44.4374	41.8438	39.8287	37.4143	32.9611	37.8531
ENSMUSG00000017428	Psmd11	11	+	80428615	80473248	proteasome (prosome, macropain) 26S subunit, non-ATPase, 11 [Source:MGI Symbol;Acc:MGI:1916327]	protein_coding	53.5523	47.721	42.1738	70.7551	60.5554	50.1555	25.2088	36.827	29.3413	22.3831	22.6941	25.0851
ENSMUSG00000017446	C1qtnf1	11	+	118428203	118449963	C1q and tumor necrosis factor related protein 1 [Source:MGI Symbol;Acc:MGI:1919254]	protein_coding	0	0	0	0	0	0	0	0	0	0	0	0
ENSMUSG00000017453	Pipox	11	-	77880615	77894096	pipecolic acid oxidase [Source:MGI Symbol;Acc:MGI:1197006]	protein_coding	0	0.080553	0.093195	0	0	0.142265	0	0	0	0	0	0
ENSMUSG00000017466	Timp2	11	-	118301069	118355740	tissue inhibitor of metalloproteinase 2 [Source:MGI Symbol;Acc:MGI:98753]	protein_coding	15.761	16.4309	17.582	7.32652	6.7172	5.2032	13.2163	17.1584	12.1047	3.18265	2.15327	3.75547
ENSMUSG00000017478	Zc3h18	8	+	122376609	122417360	zinc finger CCCH-type containing 18 [Source:MGI Symbol;Acc:MGI:1923264]	protein_coding	5.715	8.04707	8.30198	5.49685	3.70737	12.4102	21.3053	24.9942	23.9729	23.4689	16.9684	15.3062
ENSMUSG00000017485	Top2b	14	+	16365179	16435462	topoisomerase (DNA) II beta [Source:MGI Symbol;Acc:MGI:98791]	protein_coding	12.9599	11.1552	10.7419	9.14084	9.90027	6.43658	14.0817	9.20664	8.88138	13.8277	7.728	7.62547
ENSMUSG00000017491	Rarb	14	-	16430839	16819156	retinoic acid receptor, beta [Source:MGI Symbol;Acc:MGI:97857]	protein_coding	0	0	0	0	0	0	0	0	0.061505	0	0	0
ENSMUSG00000017493	Igfbp4	11	+	99041244	99054392	insulin-like growth factor binding protein 4 [Source:MGI Symbol;Acc:MGI:96439]	protein_coding	5.81335	8.10918	8.40755	17.7341	14.079	16.6528	11.9903	8.71095	12.1057	4.33906	6.42285	7.02029
ENSMUSG00000017499	Cdc6	11	+	98907801	98923940	cell division cycle 6 [Source:MGI Symbol;Acc:MGI:1345150]	protein_coding	1.23852	0.857705	0.596727	2.34613	0.570634	2.26091	1.5883	1.7587	3.99593	3.30272	3.46692	4.38691
ENSMUSG00000017548	Suz12	11	+	79993106	80034123	SUZ12 polycomb repressive complex 2 subunit [Source:MGI Symbol;Acc:MGI:1261758]	protein_coding	13.7905	10.0728	11.4858	15.253	9.65254	10.9509	15.5536	20.1898	20.3746	15.8854	25.7054	28.3547
ENSMUSG00000017550	Atad5	11	+	80089400	80135794	ATPase family, AAA domain containing 5 [Source:MGI Symbol;Acc:MGI:2442925]	protein_coding	2.29825	0.866357	1.18711	2.23526	2.1029	1.94651	5.2398	4.95499	4.13069	6.61461	3.95572	3.70771
ENSMUSG00000017561	Crlf3	11	-	80046493	80080991	cytokine receptor-like factor 3 [Source:MGI Symbol;Acc:MGI:1860086]	protein_coding	35.0677	32.2237	25.9101	51.179	31.861	22.7448	26.971	20.7979	17.217	10.5193	15.9736	16.4261
ENSMUSG00000017588	Krt27	11	-	99345565	99351104	keratin 27 [Source:MGI Symbol;Acc:MGI:1339999]	protein_coding	0	0	0	0	0	0	0	0	0	0	0	0
ENSMUSG00000017607	Tns4	11	-	99065678	99089306	tensin 4 [Source:MGI Symbol;Acc:MGI:2144377]	protein_coding	0	0	0	0	0	0	0.129092	0	0	0	0	0
ENSMUSG00000017615	Tnfaip1	11	-	78522850	78536332	tumor necrosis factor, alpha-induced protein 1 (endothelial) [Source:MGI Symbol;Acc:MGI:104961]	protein_coding	1.65933	1.91548	2.97569	2.80571	0.362993	1.90932	1.55173	3.07067	3.70968	1.52537	1.48413	2.2126
ENSMUSG00000017631	Abr	11	-	76416734	76623558	active BCR-related gene [Source:MGI Symbol;Acc:MGI:107771]	protein_coding	14.1622	12.5091	13.6031	6.18442	5.72047	9.43882	12.6909	15.813	12.7914	9.06676	5.9956	8.22336
ENSMUSG00000017639	Rab11fip4	11	+	79591212	79698023	RAB11 family interacting protein 4 (class II) [Source:MGI Symbol;Acc:MGI:2442920]	protein_coding	2.18805	2.3909	1.95035	0.929389	3.44613	1.04308	1.79706	1.61424	1.58632	1.05968	2.02812	1.33858
ENSMUSG00000017652	Cd40	2	+	165055627	165072948	CD40 antigen [Source:MGI Symbol;Acc:MGI:88336]	protein_coding	0	0	0	0	0	0	0	0	0	0	0	0
ENSMUSG00000017664	Slc35c2	2	-	165276554	165287869	solute carrier family 35, member C2 [Source:MGI Symbol;Acc:MGI:2385166]	protein_coding	24.3085	23.0577	23.1102	37.3868	44.3894	36.7748	30.57	44.5175	43.9635	41.3705	39.9355	32.393
ENSMUSG00000017667	Zfp334	2	-	165374264	165388259	zinc finger protein 334 [Source:MGI Symbol;Acc:MGI:2388656]	protein_coding	0	0	0	0	0.006885	0	0	0.127228	0	0.043219	0	0
ENSMUSG00000017670	Elmo2	2	-	165288031	165326479	engulfment and cell motility 2 [Source:MGI Symbol;Acc:MGI:2153045]	protein_coding	13.4568	7.60415	11.4331	8.26642	13.2587	2.91051	3.6281	4.3315	4.11641	2.78345	0.880478	2.59929
ENSMUSG00000017677	Wsb1	11	-	79239372	79254671	WD repeat and SOCS box-containing 1 [Source:MGI Symbol;Acc:MGI:1926139]	protein_coding	104.117	81.2308	73.8897	98.5284	98.3902	78.6775	61.3157	44.6115	47.2267	32.7632	34.8629	38.6911
ENSMUSG00000017679	Ttpal	2	+	163602314	163619013	tocopherol (alpha) transfer protein-like [Source:MGI Symbol;Acc:MGI:1923330]	protein_coding	1.8333	3.08067	1.42983	2.5865	2.06338	2.91286	2.34252	2.56749	2.42378	1.46586	1.97397	2.17353
ENSMUSG00000017686	Rhot1	11	+	80209019	80267907	ras homolog family member T1 [Source:MGI Symbol;Acc:MGI:1926078]	protein_coding	8.7764	9.25501	9.08129	13.0974	10.1992	12.0683	4.16832	6.56639	5.22812	4.1261	3.9128	6.02777
ENSMUSG00000017688	Hnf4g	3	+	3508030	3658052	hepatocyte nuclear factor 4, gamma [Source:MGI Symbol;Acc:MGI:1353604]	protein_coding	0	0	0	0	0	0	0	0.06515	0	0.073149	0	1.93484
ENSMUSG00000017692	Rhbdl3	11	+	80300912	80355955	rhomboid like 3 [Source:MGI Symbol;Acc:MGI:2179276]	protein_coding	0	0.073782	0	0	0.102499	0	0.1726	0.172172	0	0	1.9182	0.331384
ENSMUSG00000017697	Ada	2	-	163726584	163750239	adenosine deaminase [Source:MGI Symbol;Acc:MGI:87916]	protein_coding	18.2974	13.2297	17.7855	16.6243	9.25673	6.93732	3.27077	2.87257	4.81236	5.47049	5.20323	5.09955
ENSMUSG00000017707	Serinc3	2	-	163623272	163645131	serine incorporator 3 [Source:MGI Symbol;Acc:MGI:1349457]	protein_coding	95.0428	82.4391	82.9063	77.8669	80.3388	82.1822	52.1567	46.1211	49.5547	40.54	43.5589	34.2014
ENSMUSG00000017713	Tha1	11	-	117867952	117873481	threonine aldolase 1 [Source:MGI Symbol;Acc:MGI:1919026]	protein_coding	0.355963	0.244824	0.658519	0.920372	0	0	0.788187	0.255334	0.418425	0.46842	2.12817	0
ENSMUSG00000017715	Pgs1	11	+	117986292	118024011	phosphatidylglycerophosphate synthase 1 [Source:MGI Symbol;Acc:MGI:1921701]	protein_coding	21.5648	18.1398	27.5824	25.339	19.8695	19.975	23.3426	25.7099	22.0121	16.0115	14.393	12.5758
ENSMUSG00000017716	Birc5	11	+	117849251	117855743	baculoviral IAP repeat-containing 5 [Source:MGI Symbol;Acc:MGI:1203517]	protein_coding	68.7504	86.4192	74.7427	100.573	84.5615	75.2062	61.1914	64.7921	49.0338	93.412	77.7607	66.4302
ENSMUSG00000017718	Afmid	11	+	117825924	117839908	arylformamidase [Source:MGI Symbol;Acc:MGI:2448704]	protein_coding	0.88951	1.15421	1.63748	0	0.77696	1.00662	0.821029	0.922958	1.11378	0	0	0.398625
ENSMUSG00000017720	Trp53tg5	2	-	164470301	164473724	transformation related protein 53 target 5 [Source:MGI Symbol;Acc:MGI:1920853]	protein_coding	0	0	0	0	0	0	0	0	0	0	0	0
ENSMUSG00000017721	Pigt	2	+	164497520	164508301	phosphatidylinositol glycan anchor biosynthesis, class T [Source:MGI Symbol;Acc:MGI:1926178]	protein_coding	2.52401	1.14534	1.26862	7.07483	1.46804	3.28396	0.50312	1.20183	1.30293	0	0.474581	0
ENSMUSG00000017723	Wfdc2	2	+	164562413	164568510	WAP four-disulfide core domain 2 [Source:MGI Symbol;Acc:MGI:1914951]	protein_coding	0	0	0.241113	0	0	0	0	0	0	0	0	0
ENSMUSG00000017724	Etv4	11	-	101769742	101785371	ets variant 4 [Source:MGI Symbol;Acc:MGI:99423]	protein_coding	0	0	0	0.233482	0	0	0	0	0	0	0	0
ENSMUSG00000017733	Eppin	2	-	164588343	164593594	epididymal peptidase inhibitor [Source:MGI Symbol;Acc:MGI:1922776]	protein_coding	0	0	0	0	0	0	0	0	0	0	0	0.319233
ENSMUSG00000017734	Dbndd2	2	+	164486106	164493319	dysbindin (dystrobrevin binding protein 1) domain containing 2 [Source:MGI Symbol;Acc:MGI:106562]	protein_coding	0.200523	0.44883	0.902573	0.190166	0	0.651054	3.01589	0.619365	2.79656	1.26283	1.97047	5.52849
ENSMUSG00000017737	Mmp9	2	+	164940780	164955850	matrix metallopeptidase 9 [Source:MGI Symbol;Acc:MGI:97011]	protein_coding	129.497	102.402	126.133	12.9932	21.7881	13.5373	2.64808	2.98441	2.46611	0	1.86378	0.673798
ENSMUSG00000017740	Slc12a5	2	+	164960802	164999731	solute carrier family 12, member 5 [Source:MGI Symbol;Acc:MGI:1862037]	protein_coding	1.67517	2.4333	1.49076	0.478017	0.197972	0	0.049829	0.527667	0.903373	0	0	0.220366
ENSMUSG00000017747	Ghdc	11	-	100766032	100770957	GH3 domain containing [Source:MGI Symbol;Acc:MGI:1931556]	protein_coding	3.13559	2.08088	2.30814	4.59131	2.8322	3.04353	4.1744	6.03549	5.45502	1.92432	2.66947	0.962932
ENSMUSG00000017754	Pltp	2	-	164839518	164857711	phospholipid transfer protein [Source:MGI Symbol;Acc:MGI:103151]	protein_coding	0.641702	0.829737	0.323573	4.24523	0.033299	4.59783	0.152977	0.289798	0.412759	0	0	0
ENSMUSG00000017756	Slc12a7	13	+	73733094	73816754	solute carrier family 12, member 7 [Source:MGI Symbol;Acc:MGI:1342283]	protein_coding	1.32831	1.4981	0.919231	1.98256	1.02001	0.920641	0.82709	1.62059	0.476181	0.870855	2.62882	0
ENSMUSG00000017760	Ctsa	2	+	164832873	164841032	cathepsin A [Source:MGI Symbol;Acc:MGI:97748]	protein_coding	58.1916	53.7058	52.9837	47.561	49.7871	41.5841	29.3833	29.4214	27.5476	17.3289	18.7348	19.5982
ENSMUSG00000017764	Zswim1	2	+	164822686	164826871	zinc finger SWIM-type containing 1 [Source:MGI Symbol;Acc:MGI:1919221]	protein_coding	2.38849	1.17987	1.28224	2.1805	2.93744	0.613665	1.3422	1.85068	0.550056	0.373362	0	0.148158
ENSMUSG00000017765	Slc12a4	8	-	105943590	105966097	solute carrier family 12, member 4 [Source:MGI Symbol;Acc:MGI:1309465]	protein_coding	0.302636	0.294034	0.177775	0.418313	0.139939	3.43066	1.53061	2.76267	2.38984	2.77951	4.45899	0.975092
ENSMUSG00000017767	Spata25	2	-	164826389	164828537	spermatogenesis associated 25 [Source:MGI Symbol;Acc:MGI:1922892]	protein_coding	0.018554	0.076832	0.087005	0	0	0	0	0.383176	0	0	0	0
ENSMUSG00000017774	Myo1c	11	+	75650504	75673910	myosin IC [Source:MGI Symbol;Acc:MGI:106612]	protein_coding	5.27489	4.20161	4.58543	3.17088	1.73269	4.97743	5.1634	3.38362	4.70535	4.52387	5.64899	1.64973
[truncated: 53,549 more rows]
