# Supplementary material for: Partial differentiation induction of leukemia cells co-opts NK cells to erode leukemic stemness
Source: Research Square preprint supplement (doi:10.21203/rs.3.rs-8399393/v1), 2026-01-16
Supplement: Supplementary file 3 [file 3b91c99cd0aa93cf100d84b6.xlsx]

## Sheet: Kit and Itgam module
Table S2: Kit relates genes and Itgam related genes
Kit related genes	Itgam related genes
Sgk3	Gm13748
4930568A12Rik	Arpc2
Cnnm3	Inpp5d
Myo1b	D1Ertd622e
Cyp27a1	Cxcr4
Gm29539	Adipor1
Acsl3	Arpc5
A530040E14Rik	Rcsd1
A630001G21Rik	Fcgr3
Slc35f5	Arhgap30
BC003331	G0s2
Coq8a	Celf2
Fbxo18	Il1f9
Thnsl1	Ntng2
Nacc2	Rbms1
Slc2a8	Cers6
Gm43128	Gm38377
Gm13626	Aplnr
Grb14	Spi1
Cerkl	Chp1
Gm13752	Map1lc3a
Lmo2	4930405A21Rik
Tcp11l1	Msn
Paupar	Tbl1xr1
Lgr4	Atp11b
Ccdc34os	Arl14
A430105I19Rik	Sema4a
Ganc	Rit1
Gm22865	S100a6
Gm24893	Prune1
Gm29797	Mindy1
Porcn	Cers2
Gm15034	Ccdc180
1700080O16Rik	Cap1
Gm14659	Laptm5
Gm4989	Pgd
Gm15209	Srpk2
Zfp704	Gm43143
Zfand1	Maea
Gm9733	Cdkl2
Gm20089	Ccni
Gm20657	Clip1
Ift80	Pilrb1
Sh3d19	Pilrb2
Lrba	Ubl3
Cd1d1	Kdm7a
Fam189b	Gsdme
Cgn	Alox5
A530041M06Rik	Kras
4930509H03Rik	Atp1a3
Gclm	Tyrobp
1110002E22Rik	Mag
Gbp7	Ush1c
Prkacb	Zfand6
Wls	Rab6a
Slc26a7	Rhog
Shb	Rnf141
Zfp189	Lyve1
Svep1	Cln3
Gm12694	Itgam
Sgip1	Ipcef1
Gm12709	Rab32
Dhcr24	Platr6
Gm24045	Itgb2
E330017L17Rik	Gm30122
Mir7227	Tcp11l2
Napepld	Dusp6
Fam53a	Rap1b
Pi4k2b	Mcemp1
Gm37720	Gm45267
Grxcr1	Gsr
Usp46os1	Gm16193
Kit	Fam32a
Tmem165	Gm45431
Fras1	Amfr
1700028K03Rik	Arl2bp
2610524H06Rik	Map1lc3b
4930477O15Rik	Banp
Gm3970	Lgals3
Hvcn1	Pdlim2
9030607J07Rik	Lcp1
Gm7284	CT009539.1
Gm6433	Rap2a
Rbakdn	Gramd1b
4930448H16Rik	Pstpip1
Gm34248	Tle3
Gm20005	Anxa2
Tfec	Gm29123
Rpl31-ps7	Gm10030
Elmod3	Msl1
Retsat	Zmynd11
Itpr1	Fgd3
Gm15492	F12
Efcab12	Selenok-ps4
P3h3	Glrx
Bcl2l14	Gm21959
Eps8l1	Pygl
Cox6b2	Plekhg3
Zfp446	Actn1
Six5	4930423D22Rik
Megf8	Gm7142
Cyp2b10	Gm7019
Gm29920	Fam136b-ps
Gm45124	Ywhaz
Kcnc3	Myh9
Gm45441	Nfam1
Gm36696	Dazap2
Zscan2	Bin2
Nmb	Krt81
Gm37829	Cebpd
Tmem135	Hcls1
Fchsd2	Dynlt1c
Olfr635	Tmem181c-ps
Gm45819	Msrb1
2200002A13Rik	Mapk14
Gm4275	Pi16
Gm45597	Myo1f
Gm45280	Lst1
Fuom	Flot1
Esr1	Plin4
Epm2a	Svil
Arfgef3	Riok3
Il22ra2	Mocos
Aldh8a1	4933408B17Rik
Wasf1	Arap3
Dip2a	Smim3
Hcn2	Mbd2
Smim24	Zfp516
Tle2	Ehd1
Gm16235	Flrt1
Gm10744	Gda
March9	Ifit1bl1
Olfr787
Erich1
Gpat4
2810404M03Rik
Cep44
Sap30
Slc25a42
Nr2f6
Jak3
Calr3
Nlrc5
Ces2b
Nrn1l
Gm16209
Wwox
C130012C08Rik
Nt5dc2
AC157572.2
Homez
Efs
Gm4032
Spata13
Gm15735
Gm17545
Bbs9
Tmem218
Map2k5
Lactb
Ick
Gm27248
Gm48832
Slc9a9
Dag1
Pik3ip1
Timd2
Scgb3a1
BC049762
Kif3a
Hes7
Sox15
Fgf11
Gm12311
Glod4
Tmem98
Ypel2
Pdk2
Hexim2
Srp68
4930558J22Rik
Mylk4
A830005F24Rik
Hk3
Txndc15
Ptch1
AC163667.3
4933425L06Rik
Gm15488
Parp8
Six1
Pnma1
Gm5655
Dglucy
Wdr60
AC102291.2
Cpq
Gm10373
Gm29394
Gm7083
Kcnq3
Trappc9
Chrac1
Zfp647
Kctd17
Miox
AC107757.2
AC107757.3
Slc48a1
Mettl7a1
AC140982.1
A930003A15Rik
Dirc2
1520401A03Rik
Lmf1
Rsph1
Cbs
Slc44a4
Klc4
Cntnap5c
Gm5815
Tgif1
Abcg8
Rpl36-ps4
Ttc39c
Pcdhgc3
Commd10
Pdgfrb
Ablim3
Tcf4
Pold4
Gng3
Fads1
Vps37c
Gm23061
Abhd17b
Trpm3
Asah2
