# Supplementary material for: Partial differentiation induction of leukemia cells co-opts NK cells to erode leukemic stemness
Source: Research Square preprint supplement (doi:10.21203/rs.3.rs-8399393/v1), 2026-01-16
Supplement: Supplementary file 4 [file 802ad39e39f2dbc6a9b32880.xlsx]

## Sheet: gene.ClusterMean
Table S1: Mean gene expression of 17 distinct clusters of normal and leukemic cells
Gene	Cluster_0	Cluster_1	Cluster_2	Cluster_3	Cluster_4	Cluster_5	Cluster_6	Cluster_7	Cluster_8	Cluster_9	Cluster_10	Cluster_11	Cluster_12	Cluster_13	Cluster_14	Cluster_15	Cluster_16
Gm7357	0	0	0.000299988	0	0	0	0	0	0.0115803	0	0.0137806	0	0	0	0	0.00175125	0
Gm6085	0.0760671	0.0732838	0.0600962	0.0539617	0.0945695	0.0495769	0.0544632	0.0784655	0.0663009	0.100813	0.0277087	0.0669642	0.0512222	0.0375448	0.0805717	0.128127	0.119237
Gm6123	0.0348307	0.0325439	0.03508	0.035237	0.0540595	0.0288853	0.0222519	0.0265831	0.0278971	0.0334998	0.0226081	0.0288319	0.0362563	0.0274679	0.036341	0.0306861	0.10136
Mrpl15	0.689338	0.629253	0.709048	0.629745	0.659177	0.756356	0.398408	0.530752	0.0689152	0.538264	0.0947732	0.474927	0.476315	0.313932	0.596644	0.665334	0.502762
Gm37144	0.00488991	0.00538114	0.00737836	0.00200681	0.0161538	0.00593671	0.00518232	0.00228453	0	0.00302201	0	0.00512184	0.00283884	0.00234454	0.00183563	0.0042785	0
Lypla1	0.625767	0.610139	0.644159	0.604627	0.683877	0.611104	0.624195	0.653701	0.632981	0.621591	0.373122	0.520031	0.769465	0.871011	0.615666	0.525983	0.546812
Tcea1	0.505194	0.471085	0.550067	0.509202	0.434197	0.510384	0.477612	0.482535	0.301252	0.476336	0.207881	0.407953	0.536514	0.500954	0.524416	0.594941	0.374773
Gm6104	0.100711	0.0714688	0.094531	0.0816181	0.077428	0.0711545	0.065247	0.143672	0	0.0278921	0	0.0274681	0.205398	0.00291134	0.121775	0.172974	0
Gm37277	0.00224153	0.00152388	0.00330608	0.000709045	0	0.00279012	0.00255036	0.00400975	0.00654544	0.000381423	0	0	0.00424834	0.00844885	0.00213186	0.00184013	0
Rgs20	0.00078144	0.00300011	0.00177762	0.00142424	0	0.00150372	0.000869142	0.00242737	0	0.00120567	0	0.00108162	0.000889198	0	0.00298939	0	0
Atp6v1h	0.480374	0.492668	0.561909	0.498519	0.46061	0.504579	0.433081	0.452551	0.359188	0.561003	0.189664	0.48527	0.371413	0.562415	0.497518	0.34772	0.569366
Npbwr1	0	0	0.000938252	0.000409204	0	0	0	0	0	0	0	0	0	0	0	0	0
Rb1cc1	0.835537	0.860275	0.91812	0.891612	0.873981	0.718944	1.03884	0.837268	1.53331	0.844618	1.61413	1.01102	0.682328	1.05097	0.810849	0.903831	1.02952
4732440D04Rik	0.0119016	0.0142044	0.015934	0.00963898	0.0272237	0.00496995	0.0379633	0.0137457	0.186426	0.0214528	0.111616	0.019633	0.0328258	0.0671515	0.00402508	0.0461454	0
Gm2147	0.00406898	0.00459583	0.00400419	0.0105208	0	0.00230875	0.00572572	0.00502371	0.0063575	0.00243764	0.0280537	0.0112544	0.00727226	0.00658347	0.00233149	0.0077625	0
Gm19026	0.000707763	0.00202304	0.00219468	0.00254705	0	0.000584998	0.00290686	0.00118802	0	0	0	0	0	0	0.0012146	0	0
St18	0.00150044	0.000935372	0	0.000577056	0.0168774	0.000503786	0.010408	0.00620228	0	0.00692068	0	0	0.00683014	0	0	0.00166399	0
Gm37108	0.0167111	0.0196842	0.0226493	0.019461	0.0330953	0.0137853	0.00747607	0.0196814	0	0.0219413	0	0.020779	0.0129402	0.00344848	0.0106442	0.0134818	0
Pcmtd1	0.260295	0.297262	0.243953	0.283324	0.185645	0.250468	0.345132	0.271488	0.460428	0.26045	0.69909	0.347459	0.289147	0.426016	0.291301	0.383058	0.299717
Gm26983	0	0.000507426	0.000672679	0.000527478	0	0	0	0	0	0	0	0.000945426	0	0	0	0	0
Gm38372	0.00389558	0.00455881	0.00476566	0.0039427	0.00571725	0.00325085	0.00299815	0.00150619	0	0.0019564	0.0138629	0.0059314	0.000776164	0.0204273	0.00413504	0	0
Gm9826	0.000117183	0.000371945	0	0	0	0	0.00103078	0	0	0.000498397	0	0.00140306	0	0	0	0	0
Gm26901	0.015479	0.0176155	0.0264832	0.0167142	0.0227253	0.0194271	0.00380833	0.00656095	0	0.0204269	0	0.00749729	0.00208958	0	0.00825209	0.0239073	0
Rps2-ps2	0.000160651	0	0	0	0	0.000441925	0	0.000697534	0	0.00107841	0	0	0	0	0	0	0
Gm38216	0.0139755	0.0273646	0.00987232	0.0395296	0.00808401	0.0112715	0.0289086	0.0152665	0	0.00136131	0	0.0162891	0.00252682	0.00392627	0.00495727	0	0
Gm16284	0.000454944	0.0013146	0.000328175	0	0.00353778	0.000387674	0.0015364	0	0.013148	0.00104255	0	0.00623346	0	0	0.00219835	0.00122433	0
Gm15452	0.0757754	0.0258226	0.0435043	0.0332099	0.0460109	0.0364688	0.0218184	0.089895	0.0365692	0.0303513	0.0156492	0.0127338	0.102503	0.0172006	0.0625754	0.0796746	0
Gm36964	0.000183263	0	0.00158079	0.00029678	0	0.00146644	0	0	0	0	0	0.00237751	0	0	0.00198815	0	0
Gm24276	0.00426007	0.0045377	0.00144151	0.00319674	0	0.00552241	0.00334457	0.00456803	0	0.00693201	0.0106491	0.000735066	0.00361626	0	0.00628982	0.00159362	0.0378408
Gm6187	0.000142247	0.000627989	0.000218935	0	0	0.000620493	0.000641156	0	0	0	0	0	0	0	0	0.0119821	0
Gm7512	0.00109094	0.00129215	0.000950325	0.000844703	0.0010792	0.000383612	0	0.000715833	0	0	0	0	0	0	0.00096618	0	0
Rrs1	0.793972	0.752433	0.866759	0.818873	0.760687	0.867326	0.482187	0.586047	0.0541331	0.446286	0.0368731	0.523974	0.295172	0.132605	0.642399	0.497139	0.340076
Adhfe1	0.100579	0.129045	0.0789206	0.116553	0.128475	0.100729	0.14014	0.114845	0	0.0352237	0	0.12397	0.146981	0.0495767	0.126828	0.0030394	0
2610203C22Rik	0.00235349	0.00429577	0.00366567	0.00423159	0.00300777	0.00119945	0.00221056	0.000994984	0	0.00224214	0	0.0039108	0	0	0.00337865	0	0
Gm6161	0.00311931	0.00171914	0.00328726	0.00122627	0	0.00205169	0.00317486	0.00187124	0	0.00377782	0	0.00282241	0.00524647	0	0.00074964	0	0
Mybl1	0.107565	0.0681714	0.0297976	0.0817001	0.13177	0.146312	0.0588837	0.149843	0.00636554	0.0638475	0	0.0414818	0.151185	0.0111123	0.1657	0.0952605	0
Vcpip1	0.71972	0.74814	0.832771	0.798571	0.729414	0.637155	0.928746	0.764254	0.58212	0.676376	0.755511	0.742128	0.503442	0.599896	0.701151	0.625303	0.767949
1700034P13Rik	0.00136833	0.000287343	0.00180467	0.000655072	0	0.00157091	0.000923452	0	0	0.00102794	0	0.00201147	0.000793837	0	0.0043325	0	0
Sgk3	0.573124	0.590371	0.535845	0.496908	0.696087	0.580734	0.373674	0.466986	0.700039	0.795276	0.71925	0.503155	0.576395	0.726176	0.585579	0.442564	1.08495
Gm6195	0.0126156	0.00940613	0.0120227	0.0123751	0.0240368	0.0162483	0.012908	0.0173877	0.00601459	0.0130301	0	0.00512551	0.0516726	0.0224024	0.0115483	0.0296624	0
Mcmdc2	0.00146921	0.00107098	0.00162569	0.000736484	0.00311664	0.000966715	0	0.00113128	0.00653553	0.00304567	0	0.00303784	0	0	0.00321669	0	0
Snhg6	0.768582	0.70919	0.764281	0.689534	0.70777	0.70465	0.505834	0.644133	0.0668615	0.491787	0.0748043	0.646327	0.383633	0.180507	0.757108	0.530068	0.266612
Snord87	0.00431294	0.00339484	0.00241396	0.00167564	0.00416375	0.00118118	0.00578941	0.000336858	0	0.00187334	0	0.00143424	0.0157507	0	0.00184383	0	0
Tcf24	0.000427584	0	0.00154835	0.00085602	0.00159854	0	0.0245411	0.00368615	0.0434972	0.000700578	0.0495614	0.00122281	0.0208942	0.115053	0.00481752	0	0.0289462
Ppp1r42	0.003162	0.00367392	0.00432927	0.0104152	0.00210947	0.00115104	0.124943	0.0229938	0.453261	0.0042901	0.250699	0.00988832	0.167574	0.483649	0.00114473	0.00715987	0
Gm15818	0.000304138	0.000469144	0.00050601	0.00122893	0	0	0.00440009	0.0017418	0.0671172	0	0.0139333	0.001092	0.0515948	0.0591198	0	0	0
Cops5	0.651816	0.572901	0.640735	0.586098	0.620518	0.592743	0.47341	0.635015	0.383526	0.561789	0.275926	0.523285	0.585878	0.508996	0.616059	0.529538	0.611268
Cspp1	0.529483	0.40803	0.465913	0.426632	0.603342	0.422898	0.425104	0.586624	0.594235	0.347224	0.773443	0.378364	0.660992	0.602192	0.501722	0.48613	0.46689
1700047N06Rik	0.00020956	0.000302973	0	0.000410675	0	0	0	0	0	0.000567921	0	0	0	0	0	0	0
Arfgef1	1.01508	1.13351	1.02575	1.17783	1.01417	1.03361	1.7116	1.23441	1.14627	0.983428	1.02001	1.27595	1.44134	1.59193	1.0122	0.69129	0.832918
Gm26348	0.000144723	0.000373601	0.000608804	0	0	0	0	0	0	0	0	0	0.0016739	0	0	0	0
Gm37569	0.00256817	0.00229819	0.00319693	0.00363325	0.00277024	0.00201355	0.00647353	0.00439014	0.00723771	0.000886828	0	0.002554	0.000614436	0	0.00283794	0.00109503	0
Cpa6	0.00488955	0.00562098	0.004427	0.0132873	0.00132324	0.00562935	0.00541186	0.00663486	0.014041	0.000650141	0.0215198	0.00554579	0.00947434	0.00967038	0.00677055	0.00541324	0
Gm28659	0.000422718	0.000224269	0	0	0	0	0	0	0	0	0	0	0	0	0	0	0
Prex2	0.000122361	0.000774144	0	0.000700693	0	0	0	0	0	0	0	0	0	0	0	0.00556978	0
Gm22633	0	0	0.000435163	0	0	0	0	0	0	0.00109479	0	0	0.00147119	0	0	0	0
Gm2383	0.000754717	0.00107595	0.000937875	0.0012994	0	0.000766229	0.00192869	0.00066514	0.0040156	0	0	0	0	0	0.00175175	0.00131685	0
Ncoa2	0.27191	0.29542	0.218546	0.25402	0.215013	0.245807	0.349701	0.292537	0.477287	0.279997	0.596151	0.283306	0.300197	0.442559	0.297102	0.379836	0.721162
Gm38376	0.00304307	0.00249725	0.00306658	0.00385186	0	0.00178215	0.0126527	0.00565375	0	0.00163817	0.0126187	0.00382033	0.00410847	0.00874205	0.00197549	0.0316539	0
Gm37409	0.000267813	0.00033805	0	0.000674466	0.00218962	0.000617621	0	0.000495749	0	0.000690984	0.0116134	0	0	0	0.00273567	0	0
Gm27881	0.00022448	0	0	0	0	0	0	0	0	0	0	0	0	0	0	0	0
Gm38223	0.000111582	0	0	0.000300555	0.00265673	0	0	0	0	0	0	0.00122058	0	0	0.000938825	0	0
Gm37702	0.000724127	0.000266454	0	0	0	0	0	0.00160727	0	0.000822273	0	0.00115187	0	0	0.000988135	0.00402976	0
Gm38120	0.00285717	0.00160877	0.00515389	0.00453633	0.002311	0.00329744	0	0.0056498	0	0.002252	0	0	0.0321535	0	0	0.0118626	0
Gm38380	0.0045059	0.00362796	0.00454813	0.00426455	0.0128214	0.0064175	0.0039478	0.00539731	0.00592121	0.00677095	0	0.000532346	0.00852618	0.00472476	0.00294735	0	0
Gm29570	0.000392187	0.000346733	0	0	0	0	0	0	0	0	0	0.00171909	0.00252024	0	0	0	0
Gm7593	0.000398067	0.00178225	0	0.00203569	0	0.000447507	0	0.000444389	0	0	0.0113971	0	0	0	0.000759346	0	0
Tram1	1.42947	1.50131	1.51972	1.50117	1.42961	1.44147	1.47026	1.36738	0.932776	1.43573	0.808146	1.41338	1.03142	1.14873	1.35667	1.18081	1.23621
Lactb2	0.181396	0.225336	0.19574	0.21471	0.140434	0.215852	0.186815	0.166695	0.122009	0.245749	0.0537897	0.239827	0.191454	0.284438	0.226338	0.187366	0.290983
Gm38319	0.000588592	0.0012621	0.00169445	0.00205253	0	0.000356373	0.000634032	0.000723468	0	0.00282189	0	0.000709334	0	0	0.00244543	0	0
Gm5523	0.00462761	0.0060589	0.0029058	0.00448852	0.00111657	0.0046469	0.00311924	0.00365654	0.00581612	0.00478989	0.0115055	0.0055066	0.00597832	0.00426714	0.00200706	0.00227664	0
Eya1	0	0	0	0	0	0	0	0	0	0	0.00894982	0	0	0	0	0.0477426	0
Smt3h2-ps4	0.00298111	0.0031055	0.00393175	0.00265303	0.0123605	0.00264978	0.0043108	0.00356989	0	0.00253322	0	0.00214638	0.00446749	0	0.0041149	0	0
Rpl5-ps1	0.0547206	0.0566454	0.0554573	0.0480786	0.0657314	0.0422416	0.0344243	0.047803	0.0136534	0.0638211	0	0.0453576	0.0288633	0.00725106	0.0558691	0.09888	0.0561508
Gm10566	0.017054	0.0252804	0.019256	0.0234042	0.0130186	0.0212611	0.0235247	0.0149016	0.0554889	0.0237546	0.0406085	0.0163124	0.0274678	0.0428681	0.0193704	0.014514	0
Terf1	0.427691	0.238056	0.266708	0.262199	0.365731	0.28426	0.208277	0.412266	0.243492	0.254542	0.161364	0.19215	0.329976	0.2306	0.493353	0.483331	0.285388
Gm37509	0.00101788	0.000199517	0.00136364	0.000368611	0	0	0	0.000260274	0	0.00206887	0	0	0	0	0	0	0
Sbspon	0	0	0	0	0	0.000403157	0	0.00119482	0	0	0	0	0	0	0.0011837	0	0
Gm7634	0.000233801	0.00096889	0.000502906	0	0	0	0	0.000428278	0	0	0	0.00156307	0	0	0.00171684	0	0
Rpl7	2.19792	2.27809	2.29291	2.22943	2.28361	2.27154	2.03265	2.04179	0.994076	2.2001	0.682259	2.23817	1.53943	1.16785	2.18854	2.29894	1.83813
Rdh10	0.0993666	0.0818407	0.102848	0.0871552	0.102347	0.0811784	0.120339	0.0865026	0.22043	0.112218	0.130675	0.0803794	0.109843	0.199488	0.0910477	0.126089	0.224055
Stau2	0.155301	0.131097	0.104373	0.149464	0.0723839	0.180815	0.123612	0.192333	0.0103397	0.0547751	0	0.119228	0.046019	0.0108731	0.174256	0.120266	0.154582
Ube2w	0.465119	0.406937	0.359684	0.460519	0.424129	0.453777	0.399749	0.424398	0.475839	0.356045	0.458701	0.339328	0.375139	0.369361	0.372752	0.330447	0.369263
Gm38342	0.00443414	0.00341143	0.00310708	0.00560622	0.00145479	0.00283598	0.00384539	0.00133948	0.0320922	0.00329845	0.0189306	0.00544972	0.000896183	0.00611627	0.00729813	0.00709466	0.0787292
Eloc	0.824054	0.867706	0.864408	0.84185	0.806213	0.853055	0.788848	0.883422	0.886131	0.766488	0.86693	0.812267	0.819251	0.691735	0.922435	0.782258	0.404501
D030040B21Rik	0.000507557	0	0.000236907	0	0	0	0	0	0	0	0	0.00120211	0	0	0	0.0017317	0
Tmem70	0.288046	0.263609	0.290999	0.243503	0.254385	0.277899	0.15582	0.226656	0.123904	0.262866	0.142553	0.234784	0.143077	0.204736	0.260451	0.380391	0.142797
Ly96	0.0218228	0.038125	0.0328605	0.0110946	0.0359648	0.0219289	0.0484964	0.0144862	0.482784	0.192415	0.689079	0.098155	0.0199707	0.129057	0.0581692	0.0367821	0.232002
Gm29649	0.000119943	0.000282895	0	0	0	0.000348233	0	0	0	0.00115727	0	0	0	0	0	0	0
Gm5828	0.00653278	0.00717766	0.0101603	0.00800819	0.00595362	0.00773609	0.0139456	0.01054	0.0216819	0.0160425	0.0253353	0.00375258	0.0115364	0.013623	0.00766133	0.00398596	0
Gdap1	0.000488259	0.00141343	0	0.000610114	0	0.000737302	0.000546433	0.000284988	0	0.00179516	0	0	0.00371703	0	0	0.00544388	0
Gm5251	0.00276364	0.00329273	0.00471307	0.00738922	0.0133915	0.00832506	0.00456175	0.00285037	0	0	0	0.00128317	0.00187206	0	0.00194591	0	0
Rbm6-ps1	0.131505	0.116105	0.118559	0.114586	0.0810248	0.100469	0.107966	0.128425	0.126502	0.0991002	0.057352	0.109625	0.193537	0.109764	0.134867	0.174393	0.129119
Gm6075	0	0	0.00076898	0	0	0.000835462	0	0	0	0	0	0	0	0	0	0	0
Pi15	0.0170766	0.0407347	0.015094	0.00475927	0.00265386	0.018387	0.00309352	0.00618464	0	0.0126877	0	0.0925042	0	0.0126096	0.0905317	0.00201691	0
Crispld1	0	0	0	0	0	0	0	0	0	0	0	0	0	0	0	0.0308643	0
Gm7690	0.000573715	0.000771814	0.000679463	0	0	0.000816609	0.000607766	0.000379275	0	0.000885759	0	0.00272567	0	0.00692956	0.00146283	0	0
Gm17969	0.000487774	0	0	0	0	0	0	0	0	0	0	0	0.00570949	0	0	0.00141712	0
Gm17837	0.00430596	0.00312848	0.00479851	0.00289645	0.00578082	0.005294	0.00291906	0.00524274	0	0.00364796	0	0	0.00144479	0.00818018	0.00727862	0.00418381	0
Gm10075	0.00829387	0.0052705	0.00852175	0.00805347	0.0157448	0.00832332	0.00572272	0.015906	0.00496794	0.00533344	0	0.00179584	0.0285071	0	0.0087574	0.0186763	0
Gm4849	0.009387	0.00769771	0.00605762	0.00649994	0.0180283	0.00830351	0.00256017	0.00798196	0	0.00518041	0	0.00591705	0	0	0.0106506	0.00103813	0
Gm15795	0.00542021	0.00809774	0.00408744	0.00716857	0.00843792	0.00463233	0.00451537	0.00326703	0	0.00138831	0	0.00712047	0.00416818	0	0.00861047	0.00979233	0
Il17f	0.000204053	0	0.00087121	0	0	0.00162305	0	0	0	0	0	0	0.00211656	0	0	0	0
Mcm3	0.892033	1.03852	1.04572	1.19711	1.05914	1.40089	0.918995	0.908026	0.101461	0.883989	0.0668078	0.611083	1.00872	0.103377	0.869803	0.991876	0.199962
6720483E21Rik	0.000143692	0.000227871	0	0.00127759	0.00671619	0.000250045	0	0	0	0	0	0	0.000513555	0	0.00152592	0.00813	0
Paqr8	0.00448403	0.00302503	0.00695462	0.00295478	0.00880045	0.00446381	0	0.000970255	0.00691654	0.0197623	0	0.00123537	0.0104235	0	0.00443628	0.120088	0
Efhc1	0.00347232	0.00399352	0.00106598	0.00379916	0	0.00312534	0	0.00149163	0	0.00574833	0	0	0	0	0.00719391	0.00205024	0
Tram2	0.0750657	0.0858168	0.0735327	0.0816204	0.103636	0.0958823	0.0788174	0.0893599	0.230579	0.172174	0.284763	0.0962417	0.0946864	0.167184	0.0878489	0.24587	0.207586
Gm28287	0.000394174	0.000355627	0	0.000403976	0	0	0	0.00181337	0	0	0	0	0	0	0.000574994	0	0
Tmem14a	0.0154902	0.023321	0.0183532	0.0111932	0.0353813	0.0231217	0.00510871	0.0105629	0.0143328	0.0225511	0	0.0183519	0.0375023	0	0.0260575	0.0503801	0.131755
Gm38224	0.000565225	0.000448194	0	0.000935184	0.00245497	0.00607982	0.000638573	0	0	0	0	0.000774264	0	0	0	0	0
Gsta3	0.00065813	0.00184928	0	0.00154417	0	0.00385952	0	0.000943155	0	0.0174273	0	0.00445029	0	0	0.00320335	0	0
Gm7094	0	0.000656136	0	0	0	0.000561833	0	0	0	0	0	0	0	0	0.00122318	0	0
Kcnq5	0	0	0.000180367	0	0	0.000279329	0	0	0	0	0.0113971	0	0.00200783	0	0	0.126941	0
Gm7658	0.673895	0.649603	0.725683	0.612914	0.605365	0.648629	0.490893	0.55516	0.185345	0.612337	0.11596	0.561183	0.43977	0.241226	0.659245	0.813447	0.664178
Rims1	0.0912477	0.111355	0.0905097	0.137111	0.0672495	0.130397	0.337433	0.208955	0.0165453	0.0230499	0	0.11125	0.0338961	0.0213271	0.0842102	0	0
Gm6420	0	0.000594122	0	0.000632876	0	0	0.00102984	0	0	0	0	0	0	0	0	0	0
Gm29107	0.000338413	0.000713716	0.00092971	0.000724208	0	0.000912759	0.000985684	0	0	0.00209103	0	0	0	0	0.00175864	0	0
Ogfrl1	2.1928	2.07048	2.02923	2.13411	2.0991	2.19372	2.05673	2.10697	2.99519	1.5495	3.28333	1.93525	2.04581	2.31869	2.03421	1.15993	1.70588
Gm7784	0.000318625	0.000287513	0.00032921	0	0	0	0	0.000541074	0	0	0	0	0	0.0109155	0	0	0
B3gat2	0.0138892	0.015163	0.0140042	0.0169899	0.0249964	0.0131381	0.0461754	0.014317	0.0244314	0.0130448	0.0525362	0.0312078	0.00937924	0.0196878	0.0178974	0.0143199	0.0411559
Smap1	0.576776	0.555802	0.526721	0.569971	0.433998	0.49216	0.788407	0.726914	0.585496	0.41851	0.439356	0.600058	0.326347	0.452308	0.599345	0.612771	0.627906
Sdhaf4	0.311728	0.270169	0.211156	0.302591	0.28289	0.31082	0.233996	0.278879	0.108577	0.23708	0.0397651	0.255943	0.121722	0.107165	0.258162	0.355073	0.220921
Fam135a	0.000292855	0	0	0	0	0	0	0	0.0141203	0.0186796	0	0	0.0024092	0	0	0.0517503	0.0583743
Tubb4b-ps2	0.00202872	0.000508253	0	0.00152181	0	0.00104068	0	0.000513725	0	0	0	0.000481974	0	0	0.00169057	0	0
Gm28439	0.0153079	0.0216562	0.0182494	0.0121626	0.0205341	0.0146542	0.013468	0.0128995	0.00292763	0.024557	0	0.0125727	0.0105737	0.00761422	0.0116363	0.0131078	0
Gm10222	0.00359077	0.00668165	0.0040703	0.00169812	0.00347094	0.00777651	0.00235136	0.0027582	0	0.00259411	0	0.00164649	0.0116431	0	0.00276154	0.00571454	0
Gm28438	1.16046	1.19341	1.24122	1.18547	1.38776	1.22691	1.0436	1.07167	0.0904343	1.13346	0.074669	1.00061	0.465681	0.09822	0.927171	0.644666	0.704886
Gm28437	0.0134467	0.0120856	0.0152967	0.013851	0.0415258	0.0131684	0.0238962	0.0102437	0	0.0120897	0	0.0119677	0.0128269	0.0148525	0.00963152	0.00303458	0
Gm10925	0.1205	0.139402	0.128051	0.139461	0.226957	0.138938	0.123927	0.134742	0.00859167	0.121612	0	0.143929	0.0332977	0.014739	0.109899	0.0268572	0.0825622
Gm28661	0.208027	0.234918	0.21689	0.198591	0.329143	0.231061	0.193528	0.23694	0.0224103	0.213506	0	0.290478	0.135737	0.0488691	0.206657	0.116103	0.171839
Gm29216	0.0772097	0.0873636	0.0651049	0.0760357	0.118591	0.0747433	0.0708325	0.0730314	0.00745872	0.0812078	0	0.0907422	0.0594474	0.0439907	0.0809039	0.0429335	0
Lmbrd1	0.264813	0.334787	0.290649	0.31848	0.264795	0.263042	0.4329	0.281661	0.583467	0.416209	0.540862	0.454672	0.235083	0.466584	0.3028	0.37039	0.698408
4931408C20Rik	0.0349973	0.217911	0.0940989	0.0328808	0.179052	0.0699315	0.00633312	0.0440401	0.0051297	0.38596	0	0.444382	0.00369018	0	0.176202	0.08005	1.19567
Gm19028	0.00182022	0.00304614	0.00324304	0.00370044	0.00149504	0.00248562	0.00102529	0.00161188	0.0155472	0.000495198	0	0.002422	0.00210811	0.00654578	0.000642322	0.0190832	0
Gm7846	0.19361	0.134085	0.194571	0.160982	0.135307	0.153871	0.0971848	0.202035	0.0165103	0.152723	0	0.0840178	0.268007	0.0647379	0.167825	0.171784	0
Gm5697	0.0155584	0.0129317	0.00907271	0.0115176	0	0.0115592	0.00703164	0.0119306	0.00681673	0.00351291	0	0.00667813	0.0141032	0	0.00713775	0.0148015	0
Gm5525	0.0156017	0.0181007	0.0178811	0.0136896	0.0127475	0.0171145	0.00206044	0.0120312	0	0.0104333	0	0.00763448	0.00436577	0	0.0134398	0.026076	0
Gm9898	0.0015619	0.00564756	0.00337941	0.00524855	0.00816729	0.000369881	0.0032269	0.00155567	0.0241474	0.0117798	0.0209878	0.0013069	0.00298994	0	0.00115833	0	0
Gm6473	0.000578089	0.000544219	0.0018993	0.000845569	0.00550215	0.00115432	0.000550221	0.000361152	0	0.000984803	0	0	0	0	0	0	0
Phf3	0.794966	0.807169	0.883142	0.785741	0.824273	0.738993	0.852628	0.775553	1.07899	0.761283	1.30354	0.751024	0.784933	0.773385	0.739948	0.884108	0.859554
Gm37522	0.00191184	0.0016848	0.000428671	0.00191574	0	0.00204552	0.00182983	0.00117628	0	0.00264277	0	0.00246409	0.00118772	0	0.00148695	0	0
Gm37906	0.00614773	0.00750317	0.0102338	0.00734582	0.0154402	0.00735507	0.0223152	0.00922565	0.0227243	0.00658481	0	0.00697508	0.00493364	0.0160529	0.0111701	0.00281307	0
Ptp4a1	0.227314	0.200269	0.221804	0.187598	0.236636	0.220017	0.208556	0.213768	0.555875	0.297122	0.764094	0.210423	0.210769	0.229419	0.211885	0.173108	0.63526
Gm9458	0	0	0	0.000728888	0	0	0	0.00123648	0	0	0	0	0	0	0	0	0
4931428L18Rik	0.000115807	0	0	0.000360463	0	0	0	0	0.220828	0	0.228441	0	0.00241067	0.0223521	0	0.000937745	0
Gm29128	0	0	0	0	0	0	0	0	0.00604783	0	0.0119648	0	0	0.00865298	0	0	0
Gm19680	0.0846243	0.084445	0.0725008	0.0818119	0.0631087	0.0859112	0.0460504	0.0593643	0.0211956	0.0437114	0	0.073584	0.0368381	0.0365969	0.0548835	0.0391728	0.104718
Khdrbs2	0.000653642	0.000460103	0.00231364	0.00294382	0.00910918	0.000405616	0.00117542	0.000703292	0	0.000328486	0	0.000719773	0.00142672	0	0.000860265	0.00485646	0
Gm7114	0.0084389	0.00639741	0.00880326	0.0100944	0.0145094	0.00652376	0.00986696	0.00979997	0.0400052	0.00713068	0	0.00680001	0.0163798	0	0.0105023	0.00865189	0
Gm4785	0.000131498	0	0.00041717	0	0	0	0.000444456	0	0.00913675	0	0	0	0	0	0	0	0
Gm7933	0	0.000862862	0.000174668	0	0	0	0	0.00105487	0	0	0	0	0.00136077	0	0	0	0
Prim2	0.290965	0.200734	0.181046	0.233157	0.291748	0.398976	0.142615	0.27919	0.0789777	0.191112	0.0816056	0.103111	0.357142	0.0493348	0.252059	0.299982	0.199333
Gm29228	0.000848998	0.000688777	0.000958289	0.00285746	0	0.00097636	0.00102924	0.00273705	0.00283209	0.000682979	0	0.00314313	0.00419378	0	0	0.00797068	0
Gm37618	0.00311845	0.00267433	0.000930479	0.00202191	0.00649708	0.0039431	0.00314667	0.00509542	0	0.00122817	0	0.00113335	0.00177005	0	0.00319195	0	0
Gm17813	0.000400829	0	0	0.000315598	0	0.00142675	0.000456916	0	0	0	0	0	0	0	0	0	0
1700001G17Rik	0.00134727	0.000342807	0.0019007	0.000381957	0	0.00200407	0	0.000944994	0	0	0	0.00130802	0	0	0	0.00159362	0
Rab23	0.0122115	0.0127549	0.0189364	0.00926632	0.035198	0.0242517	0.0124069	0.0025491	0.49861	0.0232546	0.499191	0.0103571	0.0528272	0.117134	0.0148788	0.0633681	0
Bag2	0.0171662	0.0089896	0.0308021	0.0111892	0.0375139	0.0369592	0.00313369	0.00541755	0	0.00493294	0	0.0059559	0.010147	0	0.0047585	0.182574	0
Zfp451	0.329182	0.361621	0.385677	0.393668	0.360552	0.338948	0.340007	0.309529	0.298168	0.285187	0.0978982	0.282829	0.330851	0.257617	0.310218	0.346312	0.25146
Gm15455	0.021361	0.0214257	0.0233291	0.0206291	0.0375246	0.0203398	0.0107724	0.0170639	0.0279229	0.0215929	0	0.00642768	0.0221123	0.0146223	0.0285824	0.0308863	0
Bend6	0.000255279	0.000596822	0.00033948	0	0	0	0.00133099	0	0	0	0	0	0	0	0	0	0
Dst	0.0211999	0.0193809	0.0213007	0.0296502	0.00604376	0.013042	0.0204422	0.0179457	0.00545074	0.021001	0	0.0269744	0.00104534	0.00288471	0.0240725	0.142471	0.0789332
Gm38157	0	0	0.000212913	0	0	0.000258587	0	0	0	0.000575084	0	0	0	0	0	0	0
Gm26788	0.000170068	0	0	0	0	0	0.000937996	0.000458079	0	0.000428496	0	0	0	0	0	0	0
Gm37385	0.00137363	0.00343163	0.0024133	0.000857078	0	0.00030123	0.00181716	0.000704991	0	0.00131412	0	0.00310613	0	0	0.0040166	0	0
Gm3052	0.0568595	0.0869756	0.0572026	0.0804216	0.0742406	0.0504068	0.086482	0.0794166	0	0.0185136	0	0.149341	0.0408514	0.0330929	0.0650992	0.0761181	0
Gm37233	0.0698345	0.113074	0.0707818	0.110286	0.105488	0.0662762	0.0973863	0.0836206	0	0.0237898	0	0.14445	0.039967	0.00364292	0.106992	0.0695551	0
Ccdc115	0.785725	0.744774	0.752027	0.718664	0.770581	0.694741	0.625825	0.756364	0.224349	0.813295	0.0953582	0.78495	0.600114	0.4123	0.845328	0.567029	0.753851
Imp4	0.494942	0.444183	0.48693	0.439456	0.516172	0.486198	0.368045	0.416199	0.223751	0.374808	0.217432	0.386545	0.22936	0.269586	0.431525	0.460869	0.469159
Ptpn18	0.527685	0.592769	0.528468	0.598999	0.512162	0.52098	0.699417	0.632504	0.800251	0.656112	0.828201	0.740601	0.511203	0.72253	0.514851	0.669556	0.355114
Gm28417	0.0198259	0.0251523	0.0231546	0.0329325	0.0325749	0.0189386	0.0508362	0.0242886	0.229479	0.0271221	0.168592	0.0567147	0.0381672	0.0471381	0.0158919	0.0906913	0.0941898
4930568A12Rik	0.00752552	0.00995882	0.00975981	0.0083147	0.00429997	0.00872906	0.00265695	0.0102807	0.0181807	0.00937406	0	0.0109778	0.00723857	0	0.00549608	0	0.0799936
Prss39	0	0.00084795	0.00131645	0.00146017	0	0	0.00493143	0.00191581	0	0	0	0.0017936	0	0	0.00157145	0	0
Arhgef4	0.0412359	0.0780078	0.0580606	0.0713435	0.0652894	0.0535226	0.189994	0.0610302	0.346751	0.0399923	0.0642636	0.136456	0.0786027	0.248271	0.0421832	0.0461945	0
Gm38336	0.00180196	0.00112661	0.0017607	0.00056441	0	0.000241956	0.0012727	0.00128123	0	0	0	0.00234338	0.00343227	0.00998521	0.00292187	0.00673066	0.0390352
Fam168b	0.361568	0.375895	0.378766	0.365938	0.338363	0.357677	0.494822	0.405242	0.705476	0.456454	0.849997	0.37959	0.573945	0.670481	0.38029	0.561528	0.570168
Gm37127	0.00129962	0.00116407	0.00135829	0.00123262	0.00162535	0.00134272	0.00197298	0.00310277	0	0.00226061	0	0.00583033	0.00139046	0	0.000704781	0.00201691	0
Plekhb2	0.244058	0.337689	0.329068	0.273093	0.311126	0.312308	0.247081	0.214817	0.651698	0.535215	0.543794	0.428387	0.251076	0.28039	0.340685	0.412031	0.765803
Gm37670	0.00518372	0.00503527	0.00422655	0.00622916	0.00134618	0.00495468	0.0117399	0.00524233	0.0641742	0.0109459	0.0292117	0.0103779	0.0164696	0.036164	0.0112972	0.0220584	0
Gm8009	0	0	0.000645761	0.000326997	0	0.00040978	0	0	0	0.00156466	0	0.000942788	0.00220921	0	0.000942514	0	0
Hs6st1	0.0124451	0.0134525	0.0220986	0.0130365	0.0178349	0.0159167	0.00444495	0.00812255	0.00437191	0.0410655	0.031857	0.0167357	0.00584227	0.0110462	0.0170845	0.0219571	0.160298
Gm33280	0.00255799	0.00277036	0.00333468	0.00272236	0	0.000522638	0.00486916	0.00213959	0.0114512	0.0039435	0.0119622	0.000991031	0.00115767	0	0.00203453	0.0018473	0
Uggt1	0.80243	0.758379	0.840136	0.852351	0.830761	0.948183	0.654747	0.646863	0.499001	0.871236	0.350001	0.606709	0.662698	0.617664	0.66995	0.545474	0.76888
Neurl3	0.113645	0.352498	0.161131	0.273483	0.249407	0.124043	0.749983	0.196245	1.71792	0.67155	2.46563	0.747136	0.334535	0.90566	0.180362	0.854988	1.92872
Arid5a	0.158084	0.118094	0.162762	0.106855	0.208431	0.131955	0.0702603	0.0931054	0.388052	0.197045	0.97627	0.0569651	0.193058	0.245865	0.115623	0.203705	0.307697
4930403P22Rik	0.000300893	0	0.000382386	0.000389449	0	0.000538832	0.00113243	0	0.015197	0.00304625	0.0119595	0	0	0	0	0	0
Kansl3	0.259232	0.257709	0.265269	0.283339	0.325146	0.297147	0.255152	0.288668	0.169194	0.29182	0.162744	0.249957	0.300454	0.163715	0.276923	0.291155	0.293709
Fer1l5	0.0057593	0.00345651	0.00698313	0.00383635	0.00110964	0.0104645	0.00633321	0.00469897	0.00631582	0.00741044	0.0113147	0.00573185	0.0119727	0.00608026	0.00282446	0.00199852	0
Lman2l	0.133	0.128341	0.13531	0.156515	0.153508	0.117667	0.203159	0.139988	0.342127	0.126821	0.20231	0.096307	0.254138	0.330319	0.123254	0.108768	0.0860367
Cnnm4	0.0855993	0.0673801	0.0671781	0.0794355	0.0672498	0.0799362	0.0821812	0.10878	0.473092	0.167925	0.583102	0.0794096	0.247483	0.306854	0.0954771	0.128599	0.189028
Gm37909	0.000932016	0.000799985	0.000928719	0.000840423	0	0.00187202	0.00517237	0.00196574	0.00785379	0.00894012	0.0113935	0	0.00272503	0.0494889	0.00504112	0.00531807	0
Cnnm3	0.31614	0.340711	0.321312	0.39578	0.364215	0.367879	0.403473	0.354126	0.366604	0.268424	0.462201	0.250064	0.331857	0.307178	0.274915	0.349211	0.25898
Ankrd23	0.00293695	0.00422234	0.00537056	0.00468628	0.00175635	0.00325516	0.00647597	0.000779712	0	0.00700626	0	0.00402541	0	0	0.00340324	0.00627482	0
Ankrd39	0.0666465	0.0620608	0.0607723	0.0619794	0.0762762	0.0577786	0.050914	0.0460548	0.0202534	0.0531904	0.0235583	0.0488662	0.121086	0.0565441	0.0511222	0.0437005	0.0361843
Sema4c	0.00107439	0.00161018	0.000450371	0.000625373	0	0.0010612	0.00959078	0.000507101	0.0187451	0.0235268	0	0.00472523	0.0147274	0.0140306	0	0.162304	0
Fam178b	0.000550119	0	0.000303603	0.00041141	0	0.00022937	0.00494015	0	0	0.000514076	0	0	0.00635374	0.0104762	0	0.00418507	0
Gm6428	0.000358512	0	0.00122865	0.000207614	0.00159604	0	0	0	0	0	0	0	0	0	0.00151248	0	0
Cox5b	0.693766	0.655034	0.687265	0.649964	0.612638	0.646768	0.559294	0.657947	0.645773	0.64497	0.666518	0.58767	0.655759	0.580299	0.666709	0.482474	0.391599
Actr1b	0.299912	0.259819	0.31362	0.271846	0.248551	0.2907	0.279065	0.271687	0.508771	0.355702	0.785739	0.310959	0.443599	0.495278	0.288072	0.54595	0.637125
4933424G06Rik	0.000629378	0	0.0012435	0	0	0.000917129	0.000760404	0	0	0	0	0	0	0	0	0.00641065	0
Gm33533	9.88e-05	0.000394726	0.00172469	0	0.00654918	0.00059941	0.000866832	0.00137276	0	0	0	0	0.00114257	0	0	0	0
Zap70	0	0	0	0.000444413	0.0066809	0.000235333	0.00156518	0	0.00321778	0	0	0	0	0	0	0.193975	0
Tmem131	0.421135	0.451971	0.405755	0.410774	0.48109	0.417766	0.593378	0.435892	1.0131	0.541647	0.65358	0.50979	0.457479	0.843942	0.379633	0.478883	0.634479
Gm38115	0.00465478	0.00318781	0.00224775	0.00431662	0.00823338	0.00316334	0.00743595	0.00372543	0	0.00201514	0	0.00950922	0	0.0113678	0.00514035	0.00491665	0
F830112A20Rik	0	0	0.000664228	0	0	0.000850183	0.000776241	0.000489815	0	0	0	0	0	0	0	0	0
Rpl12-ps1	0.00696562	0.0092526	0.01044	0.00523536	0	0.00890683	0.00736139	0.00497331	0.0149613	0.0056946	0	0.0139985	0.00362664	0	0.0111831	0.0182948	0
Cnga3	0.00360512	0.0127735	0.00646866	0.0048185	0.0212377	0.0047588	0.0384754	0.0104198	0	0.00746437	0.00635865	0.0373285	0	0	0.0258421	0	0
Inpp4a	0.195003	0.327331	0.186874	0.268254	0.227252	0.158592	0.679989	0.346527	1.16159	0.394476	1.09755	0.53997	0.676081	1.15367	0.33351	0.187186	0.370801
Coa5	0.685249	0.673138	0.73938	0.714206	0.638519	0.686593	0.642879	0.614686	0.633882	0.655303	0.5753	0.599685	0.445209	0.566341	0.598324	0.782784	0.864606
Unc50	0.648763	0.593211	0.59869	0.589816	0.575134	0.563404	0.568727	0.588986	0.755139	0.621845	0.666944	0.544964	0.60172	0.688107	0.602036	0.598689	0.734856
Mgat4a	0.141957	0.145517	0.126823	0.158832	0.179806	0.141569	0.196025	0.158585	0.476883	0.105131	0.64293	0.233083	0.106652	0.0549638	0.19523	0.181864	0.0690237
4930594C11Rik	0.00127875	0.00326809	0.00174275	0.00188265	0	0.00176276	0.00444231	0.00281564	0.0169165	0	0.0884905	0.00730315	0.00609811	0	0.0127754	0	0
Gm43213	0.00055011	0.000387468	0.000347432	0.000657491	0	0.000777883	0.000352619	0.00037687	0	0.00101934	0	0	0	0	0	0	0
2010300C02Rik	0.00203362	0.00198431	0.00268119	0.0013806	0	0.00285643	0.00204093	0.00139865	0	0.00142161	0	0	0.00716728	0	0.00266342	0.0420829	0
Tsga10	0.0991296	0.0811059	0.0462568	0.0444048	0.126139	0.0580941	0.0822052	0.0886897	0.148554	0.139053	0.20351	0.123812	0.0507756	0.120444	0.13777	0.130293	0.184923
Gm26805	0.00104018	0.000739995	0.000160871	0	0	0.000998911	0	0	0	0	0	0	0	0.00651918	0	0.00351057	0
Lipt1	0.0166534	0.0149752	0.0130169	0.0137728	0.0127173	0.0225555	0.00351418	0.00957708	0	0.00503596	0.0142915	0.00848238	0.00906209	0.00570119	0.00977285	0.0271784	0
Mitd1	0.337999	0.376511	0.327393	0.395069	0.339958	0.347993	0.340692	0.39529	0.237518	0.238825	0.086999	0.33652	0.329716	0.217041	0.344538	0.451821	0.119854
Mrpl30	0.514113	0.452667	0.53749	0.444408	0.457071	0.46334	0.369631	0.428069	0.182524	0.468588	0.11939	0.392236	0.400857	0.320304	0.502042	0.564404	0.421614
Txndc9	0.819826	0.800763	0.673508	0.785436	0.693754	0.720242	0.733417	0.812235	0.669799	0.835559	0.660941	0.813464	0.854632	0.933305	0.77806	0.824815	0.587925
Eif5b	1.253	1.30695	1.38861	1.31434	1.32885	1.34023	1.1216	1.17075	0.352811	1.08018	0.236594	1.13878	0.936763	0.887762	1.20423	1.24109	1.22621
Rev1	0.135451	0.135886	0.14974	0.223732	0.216076	0.172002	0.211005	0.185723	0.0328632	0.0721142	0.0524022	0.0614909	0.2022	0.101661	0.085755	0.0798778	0
Gm37062	0.000939846	0.000258251	0.000255376	0.00132236	0	0.00171005	0.000524832	0.00107713	0	0.00111605	0	0	0	0	0.000833748	0	0
Aff3	0	0	0.000912145	0	0	0	0	0	0	0	0	0	0.00113659	0.00700994	0	0.235085	0.0654327
Gm16150	0	0	0	0	0	0	0	0	0	0	0	0	0.0254632	0.00313837	0	0.00152261	0
Chst10	0.000106331	0	0	0	0.00137908	0	0	0	0	0.0155167	0	0	0.000952726	0.00883212	0.00269795	0.116126	0
Gm6621	0	0.000279753	0.000304837	0	0	0	0	0	0	0	0	0	0	0	0.00122187	0	0
Pdcl3	0.263077	0.291856	0.26549	0.274566	0.226151	0.232974	0.381656	0.25837	0.543397	0.289318	0.328595	0.327422	0.34334	0.618366	0.282811	0.319673	0.148812
Gm37309	0.00308848	0.00681076	0.00247629	0.00260105	0.00084863	0.00345541	0.00642004	0.00291718	0.00266703	0.00746956	0.0125761	0.00206991	0	0	0.00209465	0	0
Npas2	0.00129591	0.0019765	0.00226001	0.00195099	0.00775105	0.00272561	0.00197435	0.00381977	0	0	0	0.00705619	0	0.0160284	0	0	0
Gm3617	0.001082	0.00287319	0.00295556	0.00210265	0.00445558	0.00284838	0.00537981	0.00516386	0	0.000708437	0	0.000967781	0.00217493	0	0.0020501	0.00478818	0.0295213
Rpl31	0.464748	0.492305	0.494111	0.482383	0.539067	0.478785	0.414863	0.409524	0.287542	0.504874	0.0715345	0.478361	0.460088	0.407654	0.455153	0.704259	0.373464
Tbc1d8	0.160361	0.258139	0.139333	0.289706	0.206299	0.175126	0.636021	0.329236	0.706221	0.136155	0.286418	0.38015	0.731763	0.976346	0.164565	0.232578	0.542359
Cnot11	0.363039	0.272394	0.323597	0.281643	0.368147	0.30496	0.290077	0.336583	0.299398	0.275502	0.215643	0.304008	0.268358	0.224945	0.357349	0.317056	0.259167
Gm15832	0.0217519	0.0310242	0.0286553	0.0232316	0.0206947	0.0124634	0.0259147	0.0219789	0.368612	0.0917633	0.909104	0.0378037	0.0193437	0.0521213	0.0287093	0.030647	0.14412
Snord89	0.000362882	0.0010148	0.001001	0.000345505	0	0	0	0	0	0.00315861	0	0	0	0.00619867	0	0	0
Rnf149	0.0395352	0.0597919	0.0490472	0.031838	0.0624586	0.0354275	0.0848552	0.0320686	0.443879	0.184652	1.29236	0.0870833	0.0354178	0.180403	0.0610006	0.033611	0.466632
Gm23722	0.00656728	0.0156707	0.00987185	0.0123573	0.0112211	0.0125557	0.0240821	0.00374563	0.0490152	0.0363194	0.404192	0.0280478	0.0053759	0	0.0118802	0.00131685	0
Gm5100	0.000722027	0.00102313	0.00147467	0	0	0.000928522	0	0.000904579	0	0.00113215	0.0739464	0	0.00300606	0.0084296	0	0.00109503	0
Creg2	0.00201419	0.00245571	0.00139085	0.00219858	0.0018032	0.000227053	0.000792772	0.00257588	0	0.0405268	0	0.0186548	0	0	0.0164792	0.00133017	0
D930019O06Rik	0.0609236	0.0609514	0.0538252	0.0522955	0.103609	0.0558659	0.0546956	0.042796	0	0.0407359	0.00502019	0.0719465	0.00664802	0	0.058823	0	0.0446524
Rfx8	0.0025763	0.00292563	0.00719639	0.00526266	0.00846478	0.00847293	0.00554815	0.00224698	0	0.00404479	0	0.0060464	0	0	0.00376807	0	0
Map4k4	0.459215	0.598095	0.412736	0.465566	0.463633	0.405196	0.38013	0.481776	2.02103	0.85388	1.31698	0.644019	0.235752	1.25831	0.556039	1.17845	1.16214
4930456G14Rik	0	0.000873942	0	0	0	0	0.00144553	0	0	0	0	0	0	0	0	0	0
Il1r2	0.416489	0.896608	0.397184	0.760999	0.548187	0.415518	1.0588	0.927983	1.4121	0.246347	1.95812	1.19465	0.237317	0.468913	0.87056	0.0222897	0.0799936
Gm16894	0.0349157	0.0409932	0.0381742	0.0463606	0.0301641	0.0327844	0.0425364	0.0416584	0.091865	0.0390154	0.261015	0.0455122	0.00919076	0.0621255	0.0207006	0.00603841	0
Gm37347	0.00184851	0.00410289	0.000665098	0.0014647	0.00507539	0.00168523	0.00074278	0.0012441	0.0455405	0.00239493	0.151338	0.00188147	0.0036015	0	0	0	0
Il1r1	0.0827115	0.1111	0.0940965	0.0933964	0.118734	0.0681858	0.153834	0.076593	0.0114713	0.109096	0	0.137942	0.0132241	0.0410411	0.110734	0.12067	0
Gm38070	0.0016022	0.00222771	0.00188094	0.000931841	0	0	0.00290887	0.00057982	0	0.00108406	0	0.00161396	0	0	0.00108268	0	0
Il1rl2	0.503965	0.524307	0.447059	0.521701	0.386258	0.454077	0.44384	0.45834	0.0050674	0.322661	0.0137118	0.449507	0.0945695	0.0420377	0.426802	0.051359	0
Gm17970	0	0	0	0.00158572	0	0	0.000670332	0	0	0	0	0	0	0	0	0	0
Il1rl1	0.00050543	0.00216695	0	0.00138863	0	0	0.000443456	0.00107075	0.110043	0.00512481	0.0734574	0.00148849	0.0190901	0.106753	0	0.631961	0.117475
Il18r1	0.000579888	0.00494142	0	0.00365026	0.00978348	0.000372901	0.289213	0.0443892	0.601736	0.00662046	0.364783	0.0149298	0.176501	0.570673	0.00152372	0.841607	0
Il18rap	0.249524	0.371848	0.195932	0.328694	0.313097	0.192266	0.978816	0.589085	1.69796	0.138259	1.83372	0.546198	0.81108	1.28128	0.385838	1.28649	0
Slc9a4	0.00155011	0.00456304	0.00200047	0	0.0111982	0.00188172	0	0	0	0.126907	0.0184427	0.0172969	0	0	0.00417133	0	0.0844349
Gm37915	0.000217207	0	0.000276851	0.000497659	0	0.0011844	0	0.00145404	0	0.00347917	0	0	0.00440072	0.0025351	0.00144824	0	0
Mfsd9	0.0014958	0.00432326	0.00376528	0.0021499	0.00110176	0.00109988	0.00212746	0.00349515	0.00346651	0.00320484	0.0102828	0	0	0	0	0	0
Mrps9	0.345112	0.321767	0.3668	0.317193	0.352833	0.339984	0.265593	0.287755	0.176437	0.337849	0.13175	0.271341	0.296769	0.254771	0.292416	0.384509	0.499934
Gpr45	0	0	0	0	0.00874567	0	0	0	0	0	0	0	0	0	0	0.0168147	0
Tgfbrap1	0.151617	0.186822	0.178362	0.186121	0.173065	0.165019	0.211244	0.178969	0.168421	0.238215	0.0631926	0.16183	0.198039	0.234	0.150443	0.238138	0.230309
8430432A02Rik	0.00153735	0.00255253	0.00479785	0.00237049	0.00197215	0.000299651	0.00349626	0.00402481	0.00387173	0.00383321	0.0120917	0.00856534	0.000896491	0	0.000872206	0	0
AI597479	0.177047	0.154808	0.175699	0.16447	0.188777	0.158068	0.145461	0.157759	0.13018	0.122178	0.0121991	0.136473	0.121216	0.157148	0.17029	0.174802	0.145688
Fhl2	8.73e-05	0.00031344	0.000465615	0	0	0	0.00156518	0	0	0	0	0	0	0	0	0.176972	0
Gm8210	0.48397	0.507279	0.513454	0.494103	0.463285	0.494618	0.406661	0.455178	0.208089	0.453305	0.136209	0.493658	0.386387	0.299329	0.434612	0.675325	0.227772
Nck2	0.072682	0.0857107	0.0713638	0.0703876	0.0591914	0.0925456	0.0713104	0.0665496	0.0150484	0.0402591	0.00915687	0.0815153	0.047071	0.0392701	0.0549288	0.243079	0
Gm37536	0	0	0.000536805	0	0	0.000348233	0	0.000627015	0	0	0	0.000855046	0	0	0	0	0
Gm38228	0.00658159	0.00670126	0.00972001	0.0105268	0.00897958	0.0099542	0.00630894	0.00820054	0	0.00698709	0.0158629	0.0131306	0.0233123	0.00655335	0.00692851	0.0155858	0
1500015O10Rik	0.000286801	0	0	0.00116259	0	0.000332708	0.00220106	0	0	0	0	0	0	0	0	0	0
Gm29155	0.00203391	0.00288592	0.00140578	0.00221915	0.00295273	0.000403106	0.000423922	0.00389958	0	0.00249045	0.0130344	0	0.00439898	0	0.001225	0.00495037	0
Gm29157	0.000313772	0	0	0.000860768	0	0	0	0	0	0.00046713	0	0	0	0	0	0	0
Gm29156	0.00292005	0.00193677	0.00170751	0.00164782	0.00666658	0.0047465	0.00124572	0.00070358	0	0.00377984	0	0.00113416	0.00131351	0.00697548	0.00321533	0	0
Uxs1	0.293705	0.265352	0.283116	0.286541	0.272784	0.335165	0.173934	0.223146	0.119947	0.23925	0.158094	0.209553	0.13857	0.0859583	0.236275	0.273544	0.193939
Gm16103	0.000545957	0.00234229	0.00274616	0.00159086	0.00174902	0.00149482	0	0.000468086	0	0.00198636	0	0.000994035	0	0	0	0	0
Gm19587	0.00297977	0.00423353	0.00349505	0.00222259	0.00451288	0.00236702	0.00510249	0.000913959	0	0.00237051	0	0.00319753	0.00144516	0.0103476	0.00171138	0.00338241	0.0323662
Tpp2	0.807978	0.797592	0.813284	0.802543	0.885703	0.82264	0.743144	0.807119	0.518652	0.81767	0.616266	0.714234	0.57772	0.455484	0.812304	0.959139	1.03087
Mettl21c	0.00241177	0.00174435	0.000789567	0.00157401	0.00729703	0.00157829	0.00213736	0.000863663	0	0	0	0.00129747	0.00225616	0	0.000677107	0	0
Gm8251	0.000404274	0.00167808	0.00734021	0.00404099	0.000809928	0.000594248	0	0.00174708	0	0.000742085	0	0	0.0146866	0.00602598	0	0	0
Tex30	0.348269	0.234685	0.296745	0.272581	0.359243	0.397543	0.15743	0.293785	0.0250643	0.218318	0.0719668	0.143635	0.207874	0.0817659	0.324478	0.269874	0.0897696
Kdelc1	0.176672	0.164258	0.195906	0.160619	0.229596	0.223481	0.111141	0.101884	0	0.111615	0.0261825	0.0787537	0.0379183	0.00570563	0.115498	0.110928	0.0456813
Bivm	0.234852	0.220989	0.221562	0.246975	0.217843	0.207073	0.216377	0.22231	0.0217686	0.162011	0	0.228751	0.0832993	0.0399725	0.203487	0.157442	0.278388
Ercc5	0.150258	0.133985	0.153138	0.134963	0.245701	0.138491	0.110802	0.116637	0.0512918	0.154926	0.104825	0.146484	0.0629054	0.0852689	0.161731	0.213115	0.296503
Txn-ps1	0.225624	0.248639	0.228967	0.238941	0.184058	0.244121	0.250162	0.254439	1.01198	0.2242	1.18423	0.243236	0.492499	0.662543	0.24138	0.167312	0.174633
Gulp1	0	0	0	0	0	0	0	0	0	0	0	0	0	0	0	0.0195958	0
Gm3489	0	0.000660314	0.00022238	0	0	0	0	0.000914993	0	0	0	0	0	0	0	0	0
Col5a2	0.000540457	0	0.000634736	0	0	0	0	0.000511937	0	0	0	0	0	0	0.00154779	0	0
Gm7063	0.000235332	0	0	0	0	0	0	0	0	0	0	0	0	0	0	0	0
Wdr75	0.707074	0.592373	0.68643	0.616697	0.545979	0.694512	0.303465	0.531761	0.0269072	0.418104	0.0411711	0.397641	0.163196	0.0121827	0.579662	0.473865	0.184335
Gm5526	0.208234	0.252183	0.209897	0.236487	0.226101	0.198596	0.440803	0.306695	0.839862	0.287918	0.58739	0.325055	0.509446	0.863941	0.234891	0.339464	0.328789
Gm5269	0.000121343	0	0	0.000441665	0	0.00122166	0	0.00119059	0	0	0.011649	0	0	0	0	0	0
Slc40a1	0.796954	0.676393	0.612857	1.11391	0.693868	0.810362	1.55085	1.22589	1.72819	0.15797	2.54754	0.596454	0.993076	1.3264	0.405521	0.194411	0.115059
Rpl23a-ps1	0	0.000214202	0.000310832	0	0	0	0	0	0	0.00055338	0	0	0	0	0	0	0
Gm18849	0.000342494	0	0	0	0	0	0	0.000963883	0	0.00087625	0	0	0	0	0	0	0
Dnah7b	0	0.000663659	0	0	0	0	0	0	0	0	0	0.00113335	0	0	0	0	0
Gm8326	0.00132308	0.00123626	0.0014617	0.00188042	0	0.00312173	0.00037037	0	0	0.00200509	0	0	0	0	0.00117048	0	0
Dnah7c	0.000241251	0	0.000222928	0.000350881	0	0	0.00264489	0	0	0	0	0	0	0	0	0	0
Slc39a10	0.0870447	0.131181	0.111658	0.10175	0.0894369	0.149798	0.0538583	0.0540407	0.00765606	0.0870167	0.0166237	0.0904293	0.0157641	0	0.080063	0.187063	0.167148
Gm28151	0.0042459	0.00741593	0.00905671	0.00397555	0.00947141	0.00175033	0.00158847	0.00102326	0	0.00181771	0	0.0117695	0	0	0.00292634	0.00992039	0
Gm4852	0.000178648	0.000524811	0.000742391	0.00136324	0	0.00122215	0	0.000409988	0.0030731	0.00199449	0	0.00149968	0.00481913	0	0	0	0
Gm8337	0.00188361	0.00189888	0.00358406	0.00290615	0.0013254	0.00358523	0.000923452	0.00157136	0.00461226	0.00109162	0	0	0	0	0.00246607	0	0
Gm5974	0.000119352	0	0	0	0	0.000507068	0	0	0	0	0	0	0	0.00309564	0	0	0
Gm8357	0.000546142	0.00179454	0	0.00101308	0	0	0	0.00117478	0.00426534	0.00106545	0	0	0.00248997	0.00671395	0.00223474	0	0
Gm28321	0.00215909	0.000168337	0.00291841	0	0.00144735	0.00371829	0	0	0	0.00340123	0	0	0	0	0	0	0
Tmeff2	0.000323155	0.00046782	0.000366194	0.00110847	0	0	0.000918816	0	0	0	0	0.00234368	0	0	0	0	0
Gm28322	0.000108941	0.000589712	0	0.000316506	0	0	0	0.000739525	0	0	0	0	0	0	0	0	0
Cavin2	0	0	0	0	0	0	0	0	0	0	0.0264406	0	0	0	0	0.193963	0
1700072G22Rik	0.000163444	0	0.000240312	0	0	0.000653396	0	0	0	0	0	0	0	0	0	0	0
Nabp1	0.0660236	0.113551	0.082582	0.0741154	0.143827	0.0693947	0.249832	0.0860432	0.981048	0.282986	0.831475	0.406683	0.132626	0.38867	0.159877	0.344775	1.0023
Gm17767	0.000330299	0.00238023	0.000638487	0.000703238	0	0.000476911	0	0	0.00691027	0.0295225	0	0	0	0	0.00101553	0.00538936	0.0671161
Myo1b	0.0991869	0.11357	0.124918	0.0812661	0.0982513	0.189808	0.007075	0.0269385	0.0168318	0.0500505	0.0121176	0.0537732	0.123301	0.161988	0.0640372	0.00693332	0
Gm8420	0.000114683	0.000290448	0.0014298	0.000379553	0	0.000735311	0	0	0	0	0	0.00210046	0.00252854	0	0	0	0
Stat4	0.387507	0.50945	0.351934	0.439293	0.365807	0.388556	0.474062	0.397111	0.399209	0.155004	0.488648	0.549155	0.313414	0.371188	0.434283	0.552051	0.113162
Gm28177	0.000232256	0.000396799	0	0	0	0.000402564	0.00271663	0.000860887	0	0.00109358	0	0	0	0	0.00198855	0	0
Gm3940	0.00132179	0.00184317	0.00140186	0.00196969	0.00543373	0.000948499	0	0.00195145	0	0.00142371	0	0.00452208	0.00282531	0	0	0.0016103	0
Gm31812	0.00582998	0.00395406	0.00491825	0.00718691	0.00782671	0.0020383	0.00292923	0.00489918	0	0.00114407	0.00948312	0.00507262	0.00643952	0.00726746	0.0111702	0.0169629	0
Stat1	0.336297	0.342278	0.287883	0.345499	0.281306	0.327848	0.504423	0.441821	1.0356	0.360182	0.922827	0.367013	0.590774	0.759025	0.332814	0.357688	0.429139
Gls	0.848665	0.834036	0.888054	0.801562	0.86987	0.895773	0.686673	0.782373	0.625158	0.912029	0.923543	0.767755	0.571429	0.452428	0.828239	0.917017	0.89049
Nab1	0.524498	0.543522	0.539096	0.53315	0.420773	0.511015	0.552882	0.554898	0.581697	0.62508	0.500526	0.63649	0.534888	0.522566	0.65673	0.58692	0.628718
Gm5976	0.000164736	0	0	0	0	0.00051676	0	0	0	0	0	0	0	0	0	0	0
Rps27a-ps1	0.00405098	0.00293022	0.00235475	0.00286069	0	0.00351027	0.00335646	0.00258126	0	0.00119761	0	0.000532346	0.00139295	0	0.00167552	0.00642068	0
Gm553	0	0.000268566	0	0	0	0.00168467	0	0	0.00681215	0	0	0	0.0015981	0	0	0	0
Gm5527	0.00458764	0.00153341	0.00329054	0.00390531	0	0.00120183	0.000565984	0.00343751	0	0.00475047	0	0.00204499	0	0	0	0.001305	0
Nemp2	0.0616298	0.0641435	0.0393804	0.0637889	0.105765	0.0915066	0.0759094	0.103812	0.105877	0.112615	0.450153	0.0483052	0.159198	0.0418821	0.102965	0.160736	0.375314
Gm37242	0.000293141	0.00111973	0.00119173	0.000383732	0.000954929	0.0019732	0	0	0.00597307	0.00311891	0.0277756	0.00110365	0.0109686	0.0205061	0.00267118	0.0101614	0.148461
Mfsd6	0.00446022	0.0131534	0.00506979	0.00499959	0.0156089	0.00111554	0.26294	0.024825	1.41194	0.238064	1.79514	0.101894	0.216112	0.579425	0.0122356	0.340826	0.492321
Inpp1	0.365458	0.364338	0.290187	0.47355	0.432176	0.290343	0.778328	0.691685	1.14756	0.20654	1.30676	0.422224	0.660745	0.822414	0.276221	0.357085	0.113591
Hibch	0.163319	0.17667	0.150678	0.188991	0.132291	0.164037	0.248214	0.166948	0.250107	0.121664	0.0694172	0.18067	0.132045	0.198602	0.150399	0.132054	0.129677
1700019D03Rik	0.00269047	0.00302437	0.00243464	0.00213692	0	0.00149357	0.00152707	0.00072136	0	0.00139567	0.0122908	0.00099951	0.00259504	0	0.00734732	0.0485924	0
1700019A02Rik	0.000790201	0.00074046	0.00017958	0	0	0.00043355	0	0.000444867	0	0.000820695	0	0	0	0	0	0	0
Pms1	0.143226	0.136344	0.0971186	0.139242	0.156757	0.152201	0.0886514	0.158804	0	0.0721945	0	0.0877221	0.0856099	0.0206633	0.132086	0.078244	0.0725675
Gm28777	0.000167814	0.000492029	0	0.000180756	0	0.00306097	0	0	0	0	0	0	0	0	0	0	0
Ormdl1	0.264741	0.281019	0.242655	0.285684	0.221603	0.274122	0.328289	0.351198	0.270805	0.203216	0.150813	0.270631	0.302336	0.164277	0.31156	0.322658	0
Osgepl1	0.0984758	0.163023	0.108773	0.133934	0.101113	0.117045	0.199321	0.159599	0.0937032	0.0770225	0.0343537	0.185648	0.0822207	0.0679492	0.151094	0.152869	0
Gm28551	0.000708405	0.000230581	0.000792751	0.00059256	0	0.000749605	0	0.00170644	0	0	0	0.00289422	0	0	0	0.0017317	0
Asnsd1	1.1008	1.12758	0.993891	1.12735	1.02142	1.02263	1.31683	1.27474	1.28371	0.841828	0.713149	1.25748	1.17327	1.16012	1.1612	0.695989	0.916623
Dnah7a	0.00035117	0	0.000189664	0.000654202	0	0	0	0	0	0	0	0	0	0	0	0	0
Stk17b	0.777092	1.06609	0.722739	0.686452	0.873286	0.659168	1.66146	1.00411	3.32063	1.43665	4.08977	1.73825	1.09123	1.87173	1.21436	1.62032	2.46192
Gm37863	0	0.000699963	0	0	0	0	0.00364338	0.000360593	0	0	0	0	0	0.0122154	0	0	0
Hecw2	0.000890801	0.0017969	0.000718003	0.000419779	0	0.000406791	0.0130934	0.000856825	0.239272	0.00389806	0.477783	0.010718	0.00288892	0.0819528	0.00262942	0.020018	0.0545812
Ccdc150	0.00291923	0.0011372	0.000706394	0	0	0.000762217	0.000363202	0	0	0.00179379	0	0	0.001275	0	0.00229561	0	0
Gtf3c3	0.211435	0.214122	0.194451	0.213237	0.182666	0.190959	0.156296	0.161379	0.0817307	0.192022	0.0102792	0.223244	0.0596865	0.0678044	0.202565	0.182668	0.166542
Pgap1	0.000164758	0	0	0	0	0	0	0	0.00830618	0.11968	0.0658715	0	0.00144799	0.00771551	0	0	0.0555675
Gm36955	0	0	0	0	0	0	0	0	0.00852802	0.00254813	0	0	0	0	0	0	0
Gm19637	0.000672618	0.000520381	0.000506401	0.000700102	0	0.000682572	0	0.00109412	0	0	0	0	0	0	0	0	0
Ankrd44	0.729999	0.726412	0.57313	0.76001	0.72542	0.662491	0.972752	0.813089	1.55523	0.722511	1.63215	0.777307	0.806566	0.977091	0.683014	0.801948	1.30887
4930444A19Rik	0.00231261	0.00220245	0.00156411	0.0014908	0	0.00192257	0.00379544	0.00151717	0	0.00438564	0.0276805	0.00379511	0.00178831	0	0.00124015	0	0
Gm37370	0.00679999	0.0151917	0.00825614	0.00707412	0.0106191	0.00891578	0.0144098	0.0118391	0.0475755	0.00390985	0.185695	0.0113248	0.0046937	0.00352249	0.0132154	0.00315456	0.0537363
A130048G24Rik	0.00156828	0.00358412	0.00315413	0.0031857	0.00966177	0.00166023	0.00541315	0.00103417	0.00970391	0.00141328	0.0486836	0	0.000487382	0	0.00278868	0	0
Sf3b1	1.57111	1.52288	1.58565	1.53339	1.57406	1.51188	1.66545	1.60064	2.16364	1.62325	2.61501	1.54515	1.69827	1.92458	1.55925	1.87413	2.26912
E330011M16Rik	0.00108942	0.00273265	0.000717443	0.00153375	0	0.00212803	0.001041	0	0.00338929	0.00382025	0	0.00206026	0	0	0.000970592	0	0.0733642
Coq10b	0.122827	0.150212	0.13564	0.124827	0.232186	0.129058	0.132618	0.120537	0.247478	0.271277	0.439682	0.17167	0.207645	0.219559	0.1269	0.260787	0.411663
Gm17971	0.00453278	0.00444567	0.0062803	0.00482606	0.0207714	0.00384672	0.000692766	0.000942063	0.0200466	0.0175611	0.0451662	0.00753657	0.00183196	0.0105322	0.00411767	0	0
Hspd1	1.30243	1.28951	1.4875	1.25456	1.27643	1.5771	0.716718	0.95088	0.16742	0.998566	0.158002	1.21558	0.46181	0.294778	1.52846	1.23616	0.74392
Hspe1	0.659143	0.647975	0.720165	0.593971	0.579945	0.77534	0.289641	0.424358	0.0547073	0.568935	0.0438892	0.556816	0.171508	0.0732632	0.799397	0.621087	0.13912
Gm16581	0.0144182	0.00982546	0.0113124	0.0112376	0.0103117	0.00882188	0.00642482	0.0181011	0.0079787	0.0152891	0	0.00919167	0.0260284	0.0113266	0.0163936	0.00703648	0.0505448
Mob4	0.404122	0.382402	0.355824	0.359465	0.393425	0.360687	0.437908	0.494159	0.811749	0.457228	0.875757	0.430159	0.571914	0.715421	0.478755	0.438988	0.619663
Gm6822	0.000636361	0	0.000643267	0.00222329	0	0	0	0	0.00417492	0	0	0	0	0	0	0	0
Rftn2	0.0106916	0.0191855	0.00746903	0.00805451	0.00244727	0.0116732	0.0159664	0.0118464	0.0963694	0.00677639	0.0811851	0.0080167	0.0183858	0.0266881	0.0137978	0.102697	0
Mars2	0.201871	0.167236	0.175162	0.203685	0.20143	0.182106	0.139792	0.218555	0.0443456	0.107991	0.087861	0.125726	0.100646	0.0718662	0.19328	0.181543	0
Boll	0.000155389	0	0.000799546	0	0	0.000973047	0	0	0	0	0	0	0.00208525	0	0	0.0195567	0
Gm8292	0.0436003	0.0691275	0.048229	0.0552396	0.0957405	0.0345278	0.0390089	0.0463364	0.0727601	0.0589742	0.100297	0.0860235	0.0556754	0.040477	0.0763099	0.98146	0.0373925
Plcl1	0.000116924	0	0	0	0.00500623	0.0010192	0	0.000737241	0	0.00465816	0	0	0	0	0.00110982	0	0
Gm38056	0.000529929	0.00050171	0	0.00123172	0	0	0	0	0	0	0	0	0	0	0	0	0.091283
Gm28900	0.0013946	0.000394531	0.00127365	0.00183599	0.00247015	0.000730663	0.00154524	0.00152184	0	0	0	0.000835153	0.000897035	0.00734454	0.00401814	0.00345116	0
Satb2	0.0570793	0.0657336	0.0556633	0.0673798	0.038673	0.0830419	0.0536043	0.0542209	0	0.0425231	0	0.0556912	0.0174643	0.0108274	0.0339122	0.00533494	0.120124
9130024F11Rik	0.00257121	0.00815022	0.00612125	0.00335364	0.0138044	0.00317853	0.00417279	0.000476716	0.00307616	0.00787117	0	0.00167876	0	0	0.00251	0	0
4930558J18Rik	0.0356125	0.00545652	0.00896955	0.0134747	0.0229371	0.0221158	0.00745556	0.0286575	0.013658	0.00770413	0	0	0.0158272	0	0.0289517	0.00333001	0
1700066M21Rik	0.135342	0.0702448	0.080679	0.0769984	0.094039	0.0892813	0.0521998	0.146487	0.0569617	0.128549	0.0642529	0.0386575	0.172188	0.0291802	0.149508	0.0734881	0.152683
Tyw5	0.117129	0.105081	0.11185	0.105259	0.0998189	0.0993719	0.0845446	0.114207	0.0306569	0.0899269	0.0663355	0.0859701	0.0624476	0.119017	0.102343	0.0766629	0.15053
Maip1	0.355821	0.345254	0.387903	0.346385	0.34453	0.358997	0.275296	0.313872	0.261489	0.350687	0.0649564	0.339481	0.290098	0.314578	0.343074	0.332265	0.48498
Spats2l	0	0	0	0	0	0	0	0.000442211	0	0.000695825	0.0149261	0	0	0	0	0.0735306	0
Kctd18	0.117235	0.129192	0.118423	0.0989094	0.117666	0.0964136	0.114203	0.124183	0.175682	0.115344	0.268629	0.13941	0.0807486	0.17823	0.139077	0.191663	0.197879
Sgol2a	0.44349	0.0807111	0.076289	0.122998	0.270129	0.265471	0.0690404	0.537151	0.0394092	0.193812	0.0260053	0.0518038	0.558801	0.0171483	0.59528	0.236458	0
Aox1	0.0144402	0.0450683	0.0179951	0.0328787	0.0576055	0.0222656	0.0940849	0.0164634	0.00477222	0.0368244	0	0.0895408	0	0	0.0150382	0	0
Aox3	0.000116047	0.000138373	0	0.000828278	0.00258424	0	0	0	0	0.0198862	0	0.00130638	0.0015157	0.00872243	0.000709493	0	0.0576735
Aox2	0.000484929	0.000526379	0.000337245	0.000273512	0	0	0.00107316	0.000225468	0	0.00463788	0	0.00298935	0	0	0	0	0
Gm37607	0.0214034	0.0341916	0.0304426	0.0355923	0.0215731	0.017239	0.0622615	0.0257727	0.0358869	0.018688	0.0768558	0.0719509	0.0176759	0.0533268	0.0423751	0.0225829	0
Bzw1	1.534	1.56633	1.708	1.57467	1.60375	1.57753	1.45093	1.51918	1.11227	1.69932	1.11443	1.53762	1.42645	1.35758	1.62191	1.60956	1.33171
Clk1	0.901508	0.944224	1.00404	0.907434	1.22772	0.894783	1.16492	0.947638	1.92541	1.14322	2.42017	1.05053	1.12991	1.60439	0.843363	1.38786	1.76846
Ppil3	0.158785	0.132219	0.154576	0.123511	0.157278	0.122235	0.0846759	0.101556	0.0799154	0.136059	0.0841879	0.106094	0.0791869	0.0842033	0.150204	0.20204	0.115731
Nif3l1	0.231667	0.222821	0.228242	0.194441	0.195515	0.204902	0.176249	0.184916	0.170654	0.150546	0.0834186	0.17504	0.200439	0.27711	0.22316	0.2317	0.297195
Orc2	0.378988	0.320795	0.349122	0.334426	0.382115	0.445654	0.200202	0.336866	0	0.270506	0.0148697	0.221945	0.18906	0.0426	0.362873	0.372846	0.339736
Gm23966	0.00126048	0.00066679	0.00204529	0.00207188	0.00765734	0.00275723	0.00158551	0.000916227	0	0	0	0.00164642	0.000776164	0	0.00215517	0.00527678	0
Gm15834	0.00266431	0.00296627	0.00404489	0.00256429	0.00535064	0.0027658	0.00173687	0.00414094	0	0.0017626	0	0.00133687	0	0	0.00381441	0	0
Fam126b	0.567315	0.623267	0.660725	0.987257	0.583029	0.762789	0.686353	0.552436	0.0705613	0.336406	0.0246157	0.396584	0.412411	0.189338	0.422026	0.271888	0.452193
Ndufb3	1.2534	1.23488	1.25504	1.40859	1.17689	1.3119	1.21131	1.20503	0.845982	1.11464	0.597226	1.04821	1.39684	1.28705	1.10995	1.02331	0.744111
Gm29389	0.000448045	0	0	0	0	0	0	0.000393741	0	0	0	0	0	0	0	0	0
Cbx3-ps7	0.0755579	0.0553848	0.0705088	0.0692316	0.0544912	0.0855513	0.0618973	0.0814078	0.00594885	0.0679841	0.0167685	0.0386718	0.202067	0.0725451	0.0796551	0.141891	0.0655147
Als2cr12	0.00479484	0.00875701	0.00630214	0.00925042	0	0.00396927	0.00489131	0.00543203	0	0.0053208	0	0.00664681	0	0	0.00839797	0	0
Gm20257	0.0479342	0.0768317	0.0621678	0.091598	0.0600596	0.0499566	0.065407	0.0329872	0.013952	0.0722125	0.0340008	0.084736	0.0719539	0.0431489	0.0379974	0.0959982	0
Cflar	0.634171	0.691288	0.689934	0.729769	0.630865	0.606365	0.931665	0.695956	1.33184	0.656071	1.14774	0.813446	0.893083	1.37332	0.620755	0.7055	0.895084
Casp8	0.695397	0.74267	0.638881	0.680284	0.737084	0.756782	0.678104	0.741155	0.637378	0.849293	0.451082	0.717821	0.848228	0.653732	0.832985	0.862672	0.809764
Gm37760	0.0310265	0.0306605	0.023644	0.0242927	0.0228308	0.034558	0.0245175	0.0298771	0.0346742	0.025929	0.00873128	0.0343149	0.0328127	0.0403658	0.0502057	0.0185967	0
Gm28802	0.000102332	0.000558217	0.000710423	0.000642156	0	0	0	0	0	0	0	0	0	0	0	0	0
Trak2	0.386635	0.373711	0.386135	0.382907	0.423423	0.342411	0.488439	0.466479	0.525913	0.372306	0.302753	0.347993	0.671148	0.972508	0.431304	0.908825	0.237019
Stradb	0.182875	0.171955	0.171566	0.196276	0.175958	0.16465	0.270412	0.221004	0.36238	0.155049	0.134022	0.181881	0.426974	0.640319	0.174557	0.419502	0.181416
C2cd6	0	0	0.00120903	0.000501815	0	0.00108667	0	0	0	0	0	0	0	0	0	0	0
Tmem237	0.356261	0.296854	0.303055	0.283119	0.350922	0.351624	0.166631	0.315849	0	0.276456	0	0.208699	0.0708668	0.027488	0.377972	0.191897	0
G730003C15Rik	0.0254027	0.0277824	0.0179817	0.0232436	0.0104474	0.0153015	0.0239022	0.0173547	0	0.0057479	0	0.0360726	0.011232	0.00637873	0.0191807	0.0166407	0
Mpp4	0.000588822	0	0	0.000697993	0	0.00155073	0	0.000379491	0	0	0.0133166	0.00109792	0.00285726	0	0.000801017	0.0057988	0
Gm29017	0.000460947	0.000407136	0	0.00055469	0	0.000498961	0	0.000776448	0	0.00111948	0	0	0	0	0.00118797	0	0
Als2	0.0678077	0.0646004	0.0616125	0.0771666	0.113118	0.0769068	0.052412	0.086111	0.0504579	0.0706595	0.0724314	0.05065	0.0530289	0.0284898	0.0716553	0.0553691	0.0662436
Fzd7	0.137989	0.143719	0.142688	0.134142	0.121204	0.127266	0.123122	0.119798	0.0231721	0.14263	0.0876784	0.193056	0.0148891	0.0131395	0.111377	0.0408295	0.494944
Gm26813	0.0152222	0.0195541	0.0193022	0.0236979	0.0196095	0.0144713	0.0171952	0.0110494	0	0.0218077	0.00502019	0.0174658	0.00273742	0.0321185	0.0162409	0.015766	0.181647
Gm973	0.000670167	0.00217301	0.000969833	0	0	0.000923616	0	0	0	0.00507311	0	0.000911217	0	0.00413204	0	0.0454009	0
Sumo1	0.586583	0.610162	0.683043	0.586799	0.554924	0.632557	0.615641	0.575827	0.754266	0.655562	0.67411	0.588303	0.740381	0.635243	0.597585	0.644064	0.664607
D430013B06Rik	0.0104083	0.0145664	0.0127998	0.0119817	0.0301924	0.011938	0.0116695	0.0155707	0.00452405	0.0166429	0.00974105	0.00777042	0.00467712	0.0348887	0.0108795	0.0591777	0
Gm29596	0.000166169	0.000339115	0	0.000517724	0	0.000525247	0	0	0	0	0	0	0	0	0	0	0
Nop58	1.43125	1.28605	1.52238	1.34075	1.43001	1.54894	0.791157	1.20156	0.148585	0.958069	0.0551434	0.847036	0.674081	0.100569	1.27034	1.47092	0.371667
Snord70	0.00037105	0.000724394	0.000256253	0	0	0.00123833	0	0.000527558	0	0	0	0	0	0	0	0	0
Snord11	0.000109667	0	0	0.000532826	0	0.000243053	0	0	0	0	0	0.00138869	0	0	0	0	0
Bmpr2	0.253231	0.362252	0.302711	0.221304	0.28876	0.27002	0.302169	0.207138	0.467096	0.607157	0.56586	0.491704	0.136078	0.259918	0.297696	0.232173	0.705636
Gm38125	0.000266645	0.000805947	0	0	0	0	0	0.00104292	0	0.00163076	0	0	0	0	0.00165928	0.00141712	0
Fam117b	0.513934	0.612437	0.533906	0.566689	0.555807	0.535534	0.782876	0.550304	1.59294	0.731868	1.21548	0.739556	0.566348	0.97135	0.556347	0.602526	0.976331
Gm37531	0.00969602	0.0135984	0.0101906	0.011948	0.0108365	0.00704931	0.00935691	0.0091448	0.0287078	0.0329705	0.0112605	0.00661769	0.021595	0.0079202	0.00603675	0.0086678	0
Gm18829	0.000417477	0.000374856	0	0	0	0	0	0.000489815	0	0.00165143	0	0.003841	0.000591503	0	0	0	0
Ica1l	0.00158028	0.00463302	0.00256163	0.00294542	0	0.000912175	0.00416364	0.000863004	0.00825836	0.00110188	0.013173	0.00270182	0.00100161	0	0.00193093	0.0525566	0
Wdr12	0.823795	0.655561	0.808245	0.741959	0.755832	0.847093	0.466785	0.494428	0.0535693	0.406515	0.0526558	0.330819	0.221618	0.0523173	0.532784	0.768706	0.256564
Carf	0.104163	0.0953905	0.0749699	0.0995009	0.09536	0.0995268	0.107883	0.0933659	0.0543172	0.0756375	0.0655207	0.106075	0.0542729	0.0487038	0.0955187	0.107947	0.134439
Gm15464	0.0101076	0.00571243	0.00598707	0.00766632	0.00606147	0.00962242	0.00254869	0.00600808	0	0.00226207	0	0.00525524	0.00168664	0	0.00575948	0.0072905	0
Nbeal1	0.270421	0.315681	0.294174	0.301472	0.300972	0.291814	0.287474	0.255071	0.313156	0.340338	0.522038	0.34867	0.159667	0.194799	0.29469	0.282267	0.351157
Cyp20a1	0.372743	0.376748	0.364154	0.336347	0.304558	0.354395	0.189735	0.276719	0.00436419	0.351337	0.0289524	0.32832	0.0720991	0.0393788	0.383721	0.266402	0.54735
6030460B20Rik	0.00219785	0.00253953	0.00275278	0.00274088	0.00152498	0.00119075	0.000504114	0.000810412	0	0.00142702	0	0	0	0	0.00122412	0	0
Abi2	0.208855	0.216475	0.186335	0.219824	0.188508	0.280188	0.112949	0.188645	0.0147588	0.185555	0.025807	0.159644	0.0363062	0.0319953	0.203552	0.250632	0.240611
Raph1	0.116229	0.19101	0.126869	0.136292	0.208141	0.181325	0.100629	0.148078	0.00764383	0.424834	0	0.365379	0.197224	0.0327791	0.263951	0.26309	0.517669
Gm11575	0.00156154	0.00293105	0.00210443	0.00079008	0	0.00376323	0.00172087	0.00130825	0	0.00696405	0	0.00229422	0.00439405	0	0.00184436	0	0
Eif4a-ps4	0.826286	0.771857	0.86481	0.808276	0.841281	0.82953	0.531719	0.765059	0.0935841	0.616126	0.0879478	0.659601	0.242626	0.140219	0.804393	0.475736	0.104354
Cd28	0.00774346	0.051211	0.0101155	0.0375999	0.0253439	0.0222949	0.110108	0.0329738	0.0124038	0.0352404	0	0.212028	0.00246158	0	0.0356999	0.346228	0
Gm11579	0.0515824	0.0420134	0.0583053	0.0645077	0.0215448	0.0581923	0.0227983	0.0289376	0	0.00253743	0	0.00527437	0	0	0.0166181	0.0108265	0
2310016D23Rik	0	0.00038527	0	0.000541415	0	0	0	0	0	0	0	0	0	0	0.000970592	0	0
Gm37198	0.00106209	0.00129231	0.000310535	0.000904671	0	0.00183609	0	0	0	0.000697177	0	0	0	0	0	0	0
Ctla4	0	0	0	0	0.0066809	0.000398266	0	0	0	0	0	0	0	0.00603117	0	0.101006	0
Rpl18-ps1	0.0365977	0.0413297	0.0451609	0.0450142	0.0699187	0.036395	0.0245124	0.0246552	0	0.0319782	0.014688	0.02771	0.0505269	0.00595463	0.0334837	0.040561	0
Icos	0	0	0	0	0	0	0	0	0	0	0	0	0.00178831	0	0	0.234838	0
Rpl17-ps1	0.0013933	0.00178534	0.000296344	0.00208991	0	0.00154788	0.000854434	0.00101785	0	0	0	0	0.00296302	0	0.00125775	0.0241818	0
Pard3b	0.000434422	0	0	0	0	0	0	0	0.00326437	0.00796645	0	0	0.00559511	0	0	0.0560064	0
Gm29084	0.0193203	0.0293109	0.0311305	0.0379696	0.0268725	0.0252452	0.0399287	0.0224797	0	0.0108236	0	0.024189	0	0.0032047	0.0225549	0.0140358	0
Gm11599	0.00637414	0.0105979	0.00866191	0.00569406	0.00767698	0.00994184	0.0037294	0.00943583	0	0.0107118	0	0.00110112	0.00662502	0.00344975	0.00836383	0.0129568	0
Nrp2	0.0400688	0.0549011	0.0243541	0.0301658	0.0265233	0.0526101	0.0158967	0.024718	0.00434494	0.131475	0.0241247	0.138483	0	0	0.0384771	0.0300678	0.0913522
Gm37121	0.00011364	0.000525423	0.00029125	0	0	0.000913616	0.000554434	0	0	0	0	0.00142663	0	0	0	0	0
Ino80d	0.829268	0.877492	0.80227	1.004	0.696459	0.757675	1.04001	1.02844	0.650616	0.44899	0.660732	0.640261	0.678655	0.76057	0.74644	0.54944	0.456534
Rps27-ps1	0.00222581	0.00109654	0.00220496	0.00213954	0	0.00255366	0.00426148	0.00249932	0	0	0	0.000967781	0.0120439	0.0131029	0.00324751	0.00965429	0
Ino80dos	0.0785358	0.0907798	0.0880589	0.13421	0.0920137	0.0700252	0.174457	0.117154	0.0980405	0.0240238	0.107785	0.0855197	0.0942487	0.155725	0.0685304	0.0671352	0.123352
Gm20342	0.285664	0.249785	0.273602	0.414006	0.361808	0.257963	0.421439	0.392695	0.336238	0.0613079	0.215542	0.13639	0.321788	0.318075	0.213113	0.317803	0.26525
Ndufs1	0.492325	0.501167	0.560908	0.500171	0.534223	0.49698	0.395005	0.428478	0.449112	0.519109	0.514908	0.4179	0.522958	0.567646	0.475462	0.630096	0.540922
Gm24557	0.00021418	0	0	0.000510558	0	0.000471887	0	0	0	0	0	0	0	0	0	0	0
Eef1b2	2.89832	2.92811	2.93907	2.88612	2.93869	2.99916	2.53105	2.64713	1.36518	2.76447	1.58128	2.84307	1.95607	1.34162	2.86452	3.06667	2.32933
Gm26457	0.000222061	0.00223598	0.000674551	0.00110557	0.00110176	0.00201227	0.000771007	0.00126079	0	0	0	0	0.000818934	0	0	0	0
Snora41	0.00246748	0.00347813	0.0083841	0.00308468	0.00975216	0.00613312	0.0040036	0.00179852	0.00976469	0.00305416	0	0.00228002	0.000607508	0.00797684	0.00532178	0	0
Gm11605	0.0126369	0.00850424	0.0100556	0.0125773	0.0022127	0.0105603	0.0161872	0.0129215	0.0384348	0.0188141	0.0261728	0.0128507	0.0463342	0.042343	0.0132959	0.0145825	0
Mdh1b	0.000134372	0	0	0.000439449	0	0.00123825	0	0	0	0	0	0	0	0	0	0	0
Fastkd2	0.179937	0.152007	0.194381	0.159515	0.205452	0.176045	0.0656222	0.113244	0.0116396	0.150224	0.0158047	0.0859616	0.0223344	0.00672445	0.146021	0.157996	0.0390352
Klf7	0.393727	0.646965	0.386699	0.545842	0.385371	0.420409	0.906537	0.513485	1.48652	0.376582	1.12036	0.82557	0.738459	1.3997	0.496137	0.533094	0.415036
Gm13748	0	0.000321646	0.000270512	0	0	0.000460815	0.00504392	0	0.00595258	0	0	0	0	0.0078411	0	0	0
Gm28981	0.000868236	0.00029585	0	0.000556675	0	0.000332708	0	0.000467881	0	0	0	0.00113741	0	0	0	0	0
Creb1	0.538791	0.441031	0.466481	0.440827	0.501933	0.434521	0.515313	0.538907	1.04048	0.66183	1.11308	0.434266	0.68953	0.886631	0.489783	0.72204	0.754575
Mettl21a	0.0991721	0.135054	0.0926839	0.11158	0.108795	0.114328	0.0763918	0.0859673	0.00502614	0.128707	0	0.113762	0.0305466	0.00436069	0.123372	0.097975	0.326401
Gm28982	0.000443874	0.000699447	0	0	0	0	0	0	0	0	0	0.00149149	0	0	0.00108089	0	0
2810408I11Rik	0.20378	0.142556	0.117947	0.175983	0.172707	0.290969	0.147732	0.219592	0.0418894	0.174068	0.067905	0.0806564	0.643815	0.148342	0.191183	0.160885	0.100174
Ccnyl1	0.0707135	0.0718971	0.0800352	0.0832575	0.058711	0.0946798	0.0890323	0.0948598	0.212765	0.0896862	0.111066	0.037328	0.178597	0.206145	0.0922645	0.0745281	0
Fzd5	0.0421892	0.0600386	0.0536102	0.0482514	0.0455954	0.0446161	0.0378658	0.0484612	0.0926481	0.0617675	0.105924	0.0740995	0.0273108	0.0235383	0.0728648	0.0548313	0
Gm38058	0.000233075	0	0	0.000332218	0	0.00081772	0	0	0	0	0	0	0	0	0	0	0
Plekhm3	0.0573829	0.0744549	0.0432872	0.0469446	0.1101	0.0525076	0.0399624	0.0477349	0.318141	0.330884	0.71521	0.0752674	0.0442253	0.057825	0.0702075	0.18551	0.672674
Rpl10a-ps1	0.924113	0.924063	0.970731	0.883856	1.05299	0.956631	0.645931	0.733543	0.0723926	0.944733	0.13562	0.857958	0.516626	0.13936	0.8582	1.28428	0.865373
Cryge	0.00239158	0.00327644	0.00241143	0.00216175	0	0.00514881	0	0.00112274	0	0.00184253	0	0	0	0	0.00128721	0	0
Gm7329	0	0.00148661	0	0.000327392	0	0.000924152	0	0	0	0.00153333	0	0	0	0	0	0	0
Cryga	0.00504892	0.00493399	0.00329028	0.0064456	0.00798464	0.00324197	0.00581751	0.00723822	0	0.00458757	0	0.016293	0	0	0.00190332	0	0
D630023F18Rik	0.145656	0.186771	0.139092	0.170218	0.114013	0.104384	0.204149	0.155825	0.0430696	0.0776119	0	0.228889	0.0647459	0	0.152311	0.0121954	0
Idh1	1.24464	1.36559	1.23119	1.18043	1.25015	1.16045	1.03124	1.01818	0.99595	1.61728	0.774569	1.43868	0.606022	0.835046	1.15699	0.486718	0.955214
Pikfyve	0.264481	0.280705	0.28678	0.285527	0.316548	0.261382	0.304791	0.23639	0.408654	0.352841	0.464121	0.282195	0.310456	0.343757	0.248184	0.183442	0.378092
Gm8805	0.00181763	0.000935692	0.00123737	0.00167925	0.000278138	0.00148574	0.00028084	0.000867683	0	0.000437688	0	0.00137916	0.00330496	0	0.00428697	0.0103007	0
Gm15659	0.000910737	0.000476632	0.00120937	0.000581233	0	0.00151439	0	0.000510364	0	0.000430831	0	0.00164325	0.000920303	0	0	0	0
Gm8812	0.000421474	0	0	0	0	0	0	0	0.0102093	0	0.0187661	0	0.0106904	0	0.00133632	0	0
Unc80	0.00961825	0.0270999	0.0194747	0.0263099	0.0201072	0.0258394	0.0113119	0.00424334	0	0.00303324	0	0.0336316	0.00104601	0	0.0149625	0	0
Gm37181	0	0.000568691	0	0	0	0.000250045	0	0	0	0.00087169	0	0	0	0	0.000766061	0	0
Rpe	0.358351	0.440366	0.388753	0.514763	0.385527	0.441931	0.604368	0.460141	0.224735	0.281371	0.0928126	0.402995	0.495653	0.586742	0.284968	0.193905	0.223763
Kansl1l	0.157463	0.138944	0.134767	0.120621	0.119762	0.112853	0.111955	0.171795	0.165309	0.0883999	0.13258	0.0923351	0.158677	0.14323	0.158741	0.242368	0.115308
Gm37570	0.00913427	0.0136398	0.0121466	0.0103964	0.0121169	0.00812058	0.0227333	0.017201	0.026685	0.00379874	0.029964	0.0210319	0.0230912	0.0424127	0.00670995	0.00429289	0
Gm38387	0.00572667	0.00676174	0.00598347	0.00815827	0.0145841	0.00397297	0.009236	0.00610148	0	0.00614288	0	0.00896887	0.00407884	0.014139	0	0	0.063629
Gm38162	0.00307636	0.00485163	0.00608896	0.00299323	0.0143791	0.00567366	0.0176015	0.00222348	0	0.0149189	0	0.00956161	0.0114283	0.0579838	0.0025675	0.00327871	0
Gm15789	0.00329932	0.00213588	0.00409103	0.00197633	0.00112048	0.00346595	0.00182105	0.00274665	0.00520759	0.00179291	0	0.000884657	0.0159305	0	0.00106825	0	0
Gm37285	0.000690668	0.00117237	0.00078737	0.000550729	0	0.00118236	0.000470008	0	0	0	0	0	0.031488	0	0.000671576	0	0
Gm37755	0.00472362	0.00563715	0.00512075	0.00369447	0.0205146	0.00468488	0.00714188	0.00549733	0.0141203	0.00141326	0.0139058	0.00285764	0.0165424	0.0045073	0.00449746	0.0142259	0
Gm38218	0.000293994	0.000182175	0.000292137	0	0.00477519	0.00204077	0	0.00100131	0	0	0	0.00089348	0.00190575	0	0.0027807	0	0
Acadl	0.576791	0.598286	0.57845	0.535335	0.655924	0.702676	0.399023	0.557095	0.46154	0.671716	0.329065	0.541254	0.678497	0.597302	0.686115	0.73154	0.390935
Gm15793	0.0172089	0.0197229	0.0205652	0.0214764	0.0248597	0.0172261	0.0152619	0.0149497	0	0.0139119	0	0.0205072	0.0226498	0	0.0143453	0.0424172	0
Rpl31-ps14	0.0179422	0.0132087	0.012872	0.0124494	0.0117076	0.0175286	0.0218907	0.0213199	0.00197892	0.026394	0	0.0164541	0.0147886	0.0125296	0.0102215	0.0352834	0.0761561
Lancl1	0.369497	0.294194	0.324751	0.291225	0.396287	0.336823	0.154946	0.304387	0.0218625	0.251581	0.0198086	0.188408	0.19097	0.0304147	0.305725	0.364649	0.214636
Ikzf2	0.0111266	0.0207168	0.0177576	0.00244723	0.0305768	0.0118791	0	0.000578679	0.00711743	0.0291805	0	0.00313822	0.0171596	0.031041	0.00117606	0.827641	0
Gm28580	0.000227137	0.00027271	0	0.0010188	0	0.00080972	0	0	0	0	0	0.00219846	0	0	0	0.005332	0
Bard1	0.31268	0.173868	0.0863783	0.219563	0.333931	0.409578	0.166765	0.466304	0.0132513	0.233058	0.0561902	0.0931133	0.42942	0.0377848	0.404384	0.127072	0.148394
Atic	1.08153	1.11817	1.17349	1.06662	1.07683	1.24644	0.610738	0.851813	0.0763724	0.942624	0.0524121	0.949401	0.338149	0.0511898	0.996927	0.968824	0.356193
Fn1	0.248569	0.416229	0.200694	0.0762476	1.27385	0.443854	0.0166871	0.214299	0.255468	3.2661	0.240789	1.29206	0.338288	0.214732	0.615928	0.152769	2.72786
Apol7d	0.000757541	0.00304371	0.000442417	0.000643079	0.00511674	0.00114383	0	0.000598031	0	0.00638129	0	0.00997631	0	0	0.000941512	0	0
Gm5829	0.00015377	0.000531318	0	0	0	0	0	0	0	0	0	0.00128594	0.000579255	0	0	0	0
Gm5256	0.00084371	0.000618589	0.000806408	0.00144551	0	0.00129044	0	0	0	0	0	0.00306631	0	0	0.00104406	0.000972153	0
Gm5528	0.000537124	0.000236561	0.00137521	0	0	0	0	0.00042104	0.00345973	0	0	0	0	0	0.000842625	0	0
Gm8885	0.000508653	0.000451386	0.000792076	0.000609888	0	0.000286168	0.000650834	0.000460954	0	0.000965625	0	0	0	0	0.000742652	0	0
Gm4319	0	0.000416621	0	0	0	0.000378775	0.000803653	0	0	0.00189589	0	0.00164882	0.0315939	0	0.00187774	0	0
Mreg	0.258805	0.374778	0.20486	0.320765	0.209567	0.311661	0.367137	0.336388	0.111709	0.166074	0.0941087	0.617834	0.10926	0.00844464	0.323174	0.0212763	0.173414
Gm25360	0.201685	0.0766266	0.0892878	0.0999227	0.130847	0.0916776	0.0554483	0.120041	0.010357	0.0309249	0.0125744	0.0627403	0.141753	0.0261662	0.165195	0.0913339	0
D230017M19Rik	0.0120366	0.0161282	0.00719478	0.0207016	0.00884107	0.0192747	0.0287212	0.0134976	0	0.000943101	0	0.0121855	0.0176567	0.00906192	0.00235691	0	0
Gm23472	0.000634841	0.000154587	0.000315495	0	0	0	0	0.000492453	0	0	0	0.00209291	0	0	0	0	0
Gm24497	0.0144871	0.00586922	0.0050889	0.00778774	0.00106679	0.00289154	0.000745815	0.0108337	0.003829	0.00216986	0	0.00551042	0.00971536	0.00586913	0.0080545	0.011707	0
Gm25939	0.00419395	0.00171568	0.00428803	0.00170817	0.001989	0.00303745	0.00112761	0.0010889	0	0.000387977	0	0	0	0	0.00128198	0	0
Pecr	0.195006	0.173322	0.200794	0.261507	0.186321	0.27097	0.158075	0.117875	0	0.0923268	0	0.0901116	0.0521831	0.0127144	0.128371	0.103805	0
Tmem169	0.000443391	0.000597679	0	0.000488632	0	0.00119646	0	0.000810847	0	0	0	0	0	0	0	0	0
Xrcc5	0.130136	0.116914	0.0829253	0.199556	0.0959643	0.149266	0.166283	0.128825	0.00175901	0.0254023	0.0110881	0.0516327	0.060381	0.0403832	0.0504202	0.183002	0
2025-03-04	0.0022542	0.00209011	0.000578301	0.000910265	0.00668076	0.000309828	0.00327889	0.000910206	0	0	0	0.00222788	0	0	0.00195595	0	0
Gm15843	0.0263355	0.0308682	0.0247899	0.0456083	0.0284692	0.0338068	0.0350117	0.0202798	0	0.0340612	0	0.0402266	0.00381017	0.0105637	0.0183714	0.0380665	0.0356553
Smarcal1	0.378205	0.323057	0.307837	0.362703	0.283581	0.317003	0.317022	0.377347	0.140711	0.235871	0.097409	0.240279	0.421365	0.27761	0.331908	0.23694	0.304006
Rpl37a	0.597038	0.54624	0.594874	0.579891	0.626755	0.600191	0.418256	0.47995	0.173225	0.469018	0.201524	0.499503	0.350609	0.179774	0.537934	0.5083	0.605622
Igfbp2	0.000264475	0.000596247	0.000254949	0.000509858	0	0.000407482	0	0	0	0.00033922	0	0	0	0	0	0	0
Igfbp5	0.000357029	0	0	0	0	0.000615331	0	0	0	0.0011694	0	0.00141096	0	0	0	0.00248367	0
Tns1	0.00068479	0.00279167	0.00131321	0.00190204	0.00868247	0.00172551	0.0414153	0.00428878	0.092101	0.0213166	0.720097	0.0146905	0.0123229	0.0341899	0.0216137	0.405054	0
Rufy4	0.00392357	0.025718	0.00517327	0.0115295	0.030346	0.00509954	0.0898081	0.0173347	0.486328	0.0130797	1.26627	0.0591335	0.0462013	0.0578562	0.0130022	0.0629528	0
Cxcr2	0.0516107	0.365159	0.044232	0.0766517	0.122098	0.0391758	2.02321	0.322373	4.15927	0.139221	4.78072	1.37218	1.16888	2.46021	0.31275	0.983553	0.180024
Cxcr1	0	0	0	0	0	0	0.020311	0	0.0545184	0.000684538	0.514655	0.0096223	0	0	0.000710248	0.00640083	0
Arpc2	2.41044	2.63447	2.52342	2.58267	2.39048	2.4097	3.05363	2.68386	4.08229	3.02251	3.97079	2.83599	3.25797	3.74634	2.52557	2.76537	3.36927
Gpbar1	8.5e-05	0.000386358	0	0	0	0.000343141	0	0	0	0.000384666	0	0	0	0	0	0	0
Aamp	1.0134	0.989765	1.11829	0.972551	1.1577	0.966494	0.895461	0.864753	1.14299	0.978853	1.11355	0.879534	0.799424	1.00803	0.913614	1.08829	1.18414
Pnkd	0.112656	0.120385	0.108739	0.0958772	0.0767485	0.120036	0.0794385	0.0831077	0.0736061	0.100299	0.0225841	0.0957231	0.0875531	0.187024	0.099497	0.163293	0.0295213
Gm37503	0.00713916	0.0105969	0.0110442	0.00786564	0.0080912	0.00770153	0.00351153	0.00414782	0.00842805	0.0181428	0.00988453	0.00850372	0.00237403	0.0215874	0.0121459	0.0438934	0.0268162
Tmbim1	0.243574	0.218643	0.243785	0.205362	0.239626	0.209691	0.112234	0.1557	0.0351049	0.34681	0.0336786	0.236455	0.0287098	0.0309628	0.248307	0.200468	0.61184
Gm37931	0.00157449	0.00205264	0.000716554	0	0	0.000763244	0	0.000422675	0	0	0	0	0	0	0.00148989	0	0
Catip	0.00347965	0.00951577	0.00659607	0.00185784	0.0101436	0.00222034	0	0	0.0175912	0.00598645	0	0.0189985	0.0228911	0	0.00313091	0	0
Slc11a1	0.00460031	0.0109205	0.00445251	0.00503783	0.0600655	0.0112353	0.0888886	0.00501253	1.51489	0.616316	1.7434	0.213949	0.0534757	0.401183	0.023955	0.0185493	1.50709
Ctdsp1	0.85299	0.81406	0.712166	0.787161	0.743436	0.734774	1.05242	0.996075	1.86347	0.864779	1.66513	0.823842	1.28976	1.50968	0.83438	0.820514	1.06768
Mir26b	0.000264828	0	0.000234416	0.000399885	0.0110333	0.000834026	0	0.000714604	0.00490639	0	0	0	0.00107259	0	0	0	0
Vil1	0.000844099	0.00184407	0.000531986	0.000338956	0	0.000753162	0	0.00056088	0.0442624	0.00265951	0.0150937	0.00099856	0.00183152	0.00465531	0.00212623	0	0
Usp37	0.315591	0.414309	0.339307	0.435402	0.391048	0.474391	0.376122	0.358331	0.0573211	0.290615	0.105004	0.268731	0.399662	0.201559	0.402523	0.280687	0.0586555
Gm37733	0.0085589	0.00756571	0.00745257	0.00593512	0.00498954	0.0118464	0.00684223	0.0088755	0	0.00457607	0	0.00354501	0.00217402	0.00569573	0.00856984	0.0189894	0
Cnot9	0.536568	0.506535	0.50658	0.538018	0.575656	0.652384	0.432183	0.546669	0.24252	0.448384	0.117577	0.388416	0.570629	0.277863	0.565354	0.505094	0.476334
Plcd4	0.00438241	0.00421327	0.00420817	0.00203327	0.000770982	0.00294301	0.00538069	0.00353692	0	0.00260359	0	0.00172296	0.0226445	0.00748675	0.00125775	0.00134015	0
Zfp142	0.0270937	0.0269786	0.0307607	0.0265273	0.0301255	0.0276489	0.0457602	0.027522	0.0747798	0.0337935	0.0654114	0.0210748	0.0390152	0.0563489	0.0379303	0.0319653	0
Bcs1l	0.138033	0.121223	0.108924	0.121214	0.13657	0.154519	0.116936	0.117108	0.172328	0.101331	0.0522909	0.100565	0.134607	0.189673	0.104952	0.135041	0.0998212
Rnf25	0.124905	0.136534	0.128628	0.126034	0.117558	0.107165	0.202476	0.165606	0.693839	0.136804	0.490663	0.162092	0.190974	0.495274	0.128202	0.165047	0.071963
Stk36	0.00367573	0.00582897	0.00451648	0.00451464	0.00922292	0.00544414	0.00609832	0.000733413	0.0599265	0.00371816	0.0104846	0.00850934	0.00325224	0	0.00999602	0	0
Ttll4	0.160599	0.123597	0.17063	0.151552	0.221619	0.190216	0.0916216	0.140724	0.026171	0.158448	0.0859365	0.0850143	0.11664	0.0490358	0.110776	0.18017	0.151875
Cyp27a1	0.183961	0.177193	0.181443	0.186016	0.255387	0.193072	0.0638425	0.0975513	0.00470247	0.377363	0.0323091	0.102585	0.00648794	0	0.149127	0.068014	0.937057
Prkag3	0.001445	0.00143301	0.00118607	0.00356479	0	0.00372743	0	0.00167279	0	0.000529847	0	0.000518457	0	0	0.00113033	0	0
Wnt6	0.00587093	0.00629863	0.00457782	0.00227006	0.000787029	0.00216099	0	0.00104882	0	0.0177403	0	0.0121341	0	0	0.00890499	0	0.0770615
Gm29539	0.00047482	0.00169724	0.000333137	0	0	0	0.000671648	0	0	0.00268344	0	0.00170458	0	0	0	0	0
Wnt10a	8.41e-05	0	0.000287334	0	0	0.000343588	0	0	0	0	0	0	0	0	0	0.0122555	0
Cdk5r2	0.000300697	0	0	0.000390676	0	0	0	0	0	0	0	0	0	0	0	0	0
Ihh	0.00133457	0.000888896	0.00160395	0.00158204	0	0.00149805	0.000616019	0.00141464	0.0154111	0	0	0.00110162	0.00494451	0.0104932	0.00259828	0	0
Gm37744	0	0.000730477	0.000233448	0.00069306	0.000843743	0.000952302	0	0.000383851	0	0	0.013966	0	0	0.00802669	0	0	0
Nhej1	0.0869548	0.0649663	0.0608488	0.0518084	0.0591503	0.0619393	0.0820476	0.0989195	0.0878403	0.0627135	0.0945128	0.0619665	0.0971461	0.147961	0.0722436	0.111644	0.0604265
Slc23a3	0.00554125	0.0106358	0.0415788	0.0154836	0.0185363	0.00306463	0.0101902	0.00452626	0.00949099	0.00507012	0.0617533	0.00935688	0.00339217	0.0305563	0.0103724	0.00707666	0
Cnppd1	0.650487	0.67808	0.619007	0.625178	0.783639	0.565616	0.889587	0.7102	1.63386	0.822644	1.73418	0.794922	0.864865	1.39372	0.695184	0.859756	1.11718
Retreg2	0.853438	0.735029	0.640738	0.730372	0.717313	0.791928	0.755278	0.86573	0.879763	0.691578	1.07593	0.693433	0.803332	0.707178	0.809332	0.578061	0.677582
Zfand2b	0.163844	0.163071	0.139774	0.15145	0.194352	0.127519	0.281691	0.200547	0.849756	0.202561	0.593601	0.215748	0.490179	0.733848	0.183911	0.238822	0.236908
Abcb6	0.00568183	0.00726443	0.00786953	0.00562675	0.00385187	0.00565508	0.00667076	0.0118285	0	0.00560607	0	0.00536257	0.00283831	0.0225152	0.0133892	0.0365225	0
Atg9a	0.0368882	0.0619197	0.0345582	0.0492475	0.0635546	0.0388653	0.0913324	0.0716667	0.122645	0.0278374	0.132043	0.0841584	0.107365	0.169868	0.035109	0.0476417	0.12444
Ankzf1	0.208407	0.240744	0.198492	0.232647	0.266357	0.216425	0.238386	0.208838	0.181877	0.169234	0.191153	0.264576	0.246904	0.280537	0.211348	0.197987	0.269996
Glb1l	0.0468666	0.060461	0.0605006	0.0633985	0.091685	0.0595755	0.0702246	0.0476674	0.0244742	0.0341806	0.0132151	0.0525021	0.0329378	0.0410008	0.0514539	0.0535512	0
Stk16	0.865477	0.75348	0.799969	0.830779	0.860753	0.823687	0.770589	0.8648	0.748891	0.506285	0.50349	0.66211	0.891286	0.745718	0.770614	0.577226	0.130493
Tuba4a	1.10064	0.67369	0.790419	0.785885	1.0195	0.9631	0.721576	1.17482	1.27809	0.709433	0.780199	0.564337	1.76584	1.36453	0.912178	0.723908	0.256877
A630095N17Rik	0.00013843	0	0	0.00119534	0	0	0.00301529	0	0.00593123	0.000328486	0	0	0	0.0032024	0	0.00239875	0
Dnajb2	0.0695074	0.0979907	0.0768123	0.0765862	0.0807572	0.0660187	0.0852653	0.0582524	0.0677954	0.0386766	0.0380845	0.112751	0.0204555	0.0438065	0.0787172	0.280751	0
Ptprn	0.00173068	0.000775421	0.00113147	0.00126256	0	0.000668897	0.00889729	0.000382427	0	0.0012088	0	0.000788888	0	0	0.000685935	0	0
Dnpep	0.260769	0.278181	0.256125	0.230995	0.279833	0.262329	0.225667	0.196742	0.118936	0.273415	0.070857	0.256474	0.180365	0.206655	0.244076	0.276393	0.182118
Des	0.000474482	0	0	0	0	0	0	0	0	0.00152429	0	0	0	0	0	0	0
Gmppa	0.705833	0.639241	0.648556	0.559372	0.717606	0.62712	0.470503	0.464755	0.230633	0.685537	0.0563777	0.623432	0.314549	0.433436	0.65208	0.504261	0.527826
Chpf	0.00918138	0.00679215	0.013111	0.00889756	0.024848	0.0121178	0.000775764	0.000948729	0	0.00375923	0	0.00882943	0.00227574	0	0.00386819	0.0892375	0.0410745
Obsl1	0	0	0	0	0.0131832	0	0	0	0	0	0	0	0	0	0	0.0163551	0
Tmem198	0.00100128	0	0.000638254	0.000642413	0.00645798	0.000738198	0.000600781	0.000379303	0	0.0029841	0	0	0.000776164	0	0.00147163	0.0663235	0.140133
Inha	0	0.000542179	0	0	0	0	0	0	0	0	0	0	0	0	0	0.0279435	0
Stk11ip	0.269086	0.261221	0.231387	0.249626	0.335971	0.22212	0.279762	0.214456	0.428939	0.357271	0.769133	0.361403	0.196065	0.333869	0.296569	0.409856	0.264855
Slc4a3	0	0	0.000281177	0	0	0	0.00181775	0	0	0	0	0	0	0	0	0.0287041	0
Epha4	0	0	0	0	0	0	0	0	0	0.0118093	0	0	0	0	0	0.0196597	0
Sgpp2	0.000887086	0.000384667	0.000886937	0.000303824	0	0.00182941	0.00137958	0.000837827	0	0.000915161	0	0.000855739	0	0	0.001276	0	0
Farsb	0.687716	0.634306	0.679615	0.646214	0.613346	0.736716	0.312954	0.503266	0.0642518	0.536352	0.0437474	0.437265	0.194645	0.0791546	0.601537	0.551651	0.268708
Gm28995	0.00175103	0.00112707	0.00270872	0.000733077	0.00458426	0.00110877	0.00410884	0.00164854	0	0	0	0.00248651	0	0	0.00283659	0	0
4833412K13Rik	0.00476205	0.00464458	0.00711574	0.00311398	0	0.00963815	0.000543857	0.00266243	0	0.00229266	0	0.00414517	0.00156926	0	0.00559524	0.00131685	0
Mogat1	0.00018933	0	0	0	0	0.000243448	0	0	0	0.00411873	0	0	0	0	0	0	0
Acsl3	0.147136	0.162663	0.116013	0.118183	0.127777	0.15735	0.0755392	0.152302	0.00801213	0.106288	0.011875	0.133471	0.0648206	0.0110002	0.175262	0.149685	0.07449
Utp14b	0.140658	0.207899	0.143306	0.163874	0.150752	0.15432	0.148073	0.151157	0.0105924	0.124146	0.00869918	0.193421	0.0582812	0.0565831	0.134765	0.0692016	0.103912
Gm6159	0.0745829	0.0646639	0.0678934	0.0629077	0.0649351	0.0781508	0.0694745	0.0611518	0.0161156	0.0533814	0.0143999	0.0513747	0.0660102	0.0102954	0.0620904	0.0951076	0
Gm5830	0.000513414	0.000555115	0.000600149	0.00029	0	0.00229084	0	0.00222524	0	0.00302589	0	0	0.0018663	0	0.00144824	0.00176036	0
Ap1s3	0.115244	0.097453	0.106266	0.125182	0.0683428	0.113953	0.135366	0.138916	0.153923	0.145787	0.0614567	0.0879544	0.24477	0.409994	0.118685	0.267513	0.033253
Gm37886	0	0.000744326	0.000640719	0	0	0.00113111	0	0	0	0	0	0	0	0	0	0	0
Wdfy1	0.582669	0.639456	0.586394	0.699454	0.652428	0.598146	0.754153	0.646812	0.619019	0.490321	0.269915	0.609282	0.689513	0.849048	0.535934	0.532171	0.386922
Mrpl44	0.323985	0.301355	0.300613	0.274163	0.308289	0.294455	0.218633	0.297766	0.124225	0.19457	0.0338067	0.245569	0.202327	0.267044	0.291138	0.265857	0.180698
Serpine2	1.47955	1.21832	1.35281	1.55528	1.28154	1.39116	1.23797	1.41122	0.239454	0.178844	0.111513	0.932996	0.857813	0.599807	1.3011	0.492568	0.0230548
Gm5529	0.00427816	0.00545532	0.00587037	0.00670858	0.00747612	0.0070883	0.00816501	0.00678638	0.0115822	0.00441394	0	0.00639173	0	0	0.00645412	0.0119039	0.0898225
Gm28071	0.00117511	0.0019329	0.00323076	0.00266476	0.00790951	0.00323327	0.000562351	0	0.00731684	0.0035122	0.0517265	0.00494365	0	0.016564	0.00290002	0.00588169	0
Gm38339	0.000150148	0	0	0.00146879	0	0	0.00269498	0.000346467	0	0	0.00915687	0	0.000666387	0	0	0	0
Gm37932	0	0.000151738	0	0	0	0	0	0	0	0	0	0.001455	0	0	0.00145499	0	0
Cul3	1.15532	1.16306	1.16673	1.15405	1.07339	1.08653	1.40169	1.27886	1.65111	1.21862	1.50608	1.25847	1.37359	1.53409	1.18015	1.14648	1.2638
Gm37902	0.00917052	0.00947832	0.0151212	0.0110354	0.0104658	0.00885162	0.0190065	0.014647	0.0447939	0.0135369	0.0127761	0.0277823	0.0372254	0.0372096	0.007018	0.0449897	0
Gm37262	0.00155475	0.0019337	0.00229197	0.00158408	0	0	0.00120292	0.00146982	0	0.000997376	0	0.00556434	0.00464119	0	0.000902497	0	0
Gm29125	0.00119885	0.00102131	0.00163872	0.00102596	0.00411671	0.00275258	0.00113655	0	0	0.00049341	0	0.0047813	0	0	0.00294543	0	0
Dock10	0.530851	0.541369	0.458798	0.511948	0.622322	0.598869	0.275685	0.385346	0.0684248	0.68432	0.0950852	0.580956	0.536153	0.289037	0.53274	0.874196	0.689878
Gm37645	0.00746618	0.00983066	0.00440988	0.0110201	0.0264713	0.0113628	0.00687884	0.00483055	0.0084552	0.0160006	0	0.0210224	0.01049	0	0.00851855	0	0.0364819
Gm38062	0.0110211	0.00737035	0.00639022	0.00644662	0.00992587	0.00987498	0.00459852	0.00436073	0.00478442	0.00974	0	0.0101265	0.00985181	0	0.00761358	0.00416253	0
A630081D01Rik	0.0156691	0.0151374	0.012579	0.0186543	0.0231452	0.0111987	0.00796831	0.00950737	0	0.00973613	0	0.0217858	0.0373671	0	0.00931635	0.0020319	0
Gm6198	0.00110207	0.000354006	0.000947242	0.000480688	0.00781075	0.000388553	0	0.000799733	0	0.00136556	0	0.00238744	0	0	0	0	0
Gm5530	0.00890164	0.00904255	0.0115154	0.0146858	0.00173774	0.0119602	0.0468305	0.0158083	0.126871	0.00707707	0.0440949	0.00749727	0.0998752	0.230513	0.0142638	0.0364938	0.0586555
Gm7516	0.000385403	0	0	0	0	0.00237436	0	0.000738315	0	0	0	0	0.000818934	0	0	0	0
Irs1	0.000201429	0	0	0	0	0	0	0	0	0	0	0	0	0	0.00206113	0	0
Rhbdd1	0.295158	0.27948	0.211631	0.300744	0.257911	0.247446	0.323216	0.346785	0.308178	0.217129	0.225272	0.290382	0.217774	0.246048	0.328771	0.213307	0.403439
Gm19552	0.0037985	0.00336422	0.00514504	0.00325972	0.0346578	0.00150769	0.0070999	0.00401918	0	0.0054465	0	0.00189888	0.0074302	0	0.00511506	0.00201691	0
Gm28940	0.00170081	0.00043781	0.000514297	0.00169114	0.0009133	0.000761728	0.00295685	0.000830077	0	0	0	0.00391908	0	0.00860443	0.0034714	0	0
Col4a4	0.00740202	0.00475464	0.0057933	0.00433318	0.00208716	0.00497298	0.0102422	0.0100515	0.00589157	0.00814744	0	0.00122221	0.00658926	0.0093602	0.0129509	0.0163186	0
Col4a3	0.000494252	0.000541992	0.00130673	0.000393683	0	0	0.000310767	0.000693263	0	0.000529847	0	0	0	0	0.00233817	0	0
C430014B12Rik	0.00100842	0.00259293	0.0038803	0.00121903	0.00247788	0.00264344	0.00240478	0.0032994	0	0.00180661	0	0.00115398	0.00236111	0	0	0	0
Mff	0.409592	0.397581	0.382498	0.381358	0.362894	0.327081	0.484993	0.442937	1.09157	0.462269	0.838305	0.418896	0.593289	0.910317	0.384808	0.419681	0.661021
Gm28941	0.00613767	0.0101245	0.0120771	0.00927056	0.00497374	0.0100474	0.0156909	0.00891587	0.00857575	0.0106308	0	0.0125009	0.0033507	0.017446	0.00786111	0.00356213	0
Tm4sf20	0.000735473	0.000502927	0.000757019	0.000744804	0	0	0	0	0.0099393	0	0	0.00112541	0	0	0	0	0
Gm17764	0.0011395	0.00158567	0.000353356	0.0010625	0.00491512	0	0	0.000914993	0	0.00126377	0	0.00245993	0.00160895	0	0.000742652	0	0
Agfg1	0.412839	0.434108	0.391013	0.420598	0.399817	0.393654	0.522717	0.4405	0.833842	0.495953	0.73048	0.444173	0.497684	0.580726	0.422765	0.560235	0.633876
A030005L19Rik	0.000699888	0.000446387	0.000251373	0.000739156	0	0.00129029	0.00446605	0.00227561	0.0149252	0.00355576	0	0.00436831	0.00558484	0	0.00152357	0.00529039	0
Gm7553	0.00022589	0	0	0	0	0.000393622	0.000489345	0.00038765	0	0.00195617	0	0	0	0	0	0	0
Gm7539	0.00147619	0.00232202	0.00102344	0.00057726	0	0	0.000634988	0.00160148	0	0.0011811	0	0	0	0	0.003727	0.001307	0
Gm6374	0.00568249	0.00455313	0.00618453	0.00511982	0.00644993	0.00313539	0.00244128	0.00513766	0	0.0031308	0	0.00240039	0.00210902	0	0.00430081	0.00576635	0
Pid1	0.000535267	0.00497696	0.00209095	0.00162514	0.0404236	0.000808018	0.00850661	0.000572412	0.046184	0.672851	0.12712	0.027668	0.00505616	0.0280214	0.00942346	0.145833	1.03053
Dner	0.000280917	0.000821358	0	0.000625118	0	0.000562065	0.000946483	0	0.017802	0.00274237	0	0.000949594	0	0	0.00453892	0	0
Trip12	0.939241	0.944118	1.01011	1.00616	0.931711	0.899109	1.01994	0.978302	1.12313	0.919976	1.13659	0.921527	0.864357	1.05046	0.883325	1.07841	0.912698
Gm38374	0.00241631	0.00221198	0.000814938	0.00182149	0	0.00336264	0.000650475	0.00144935	0	0	0	0.00160385	0	0	0	0	0
Gm37738	0.00235539	0.003146	0.00546554	0.00395744	0.000825155	0.00303008	0.000446158	0.00358796	0.0135791	0.00524447	0.0545667	0.00221639	0	0	0.00521232	0.00295503	0
Fbxo36	0.0955727	0.0804608	0.0997316	0.0789327	0.111661	0.100832	0.0425105	0.0526279	0	0.0807917	0	0.063217	0.0205444	0	0.0469931	0.0379008	0.0732319
Slc16a14	0.00156987	0.00917499	0.00129152	0.000891065	0.00725662	0.00333314	0.00117185	0.00256551	0.137828	0.010516	0.267628	0.0521213	0	0.00990056	0.0196105	0.0141393	0
Gm15433	0.00539288	0.00650737	0.00284525	0.00778371	0	0.00271525	0.0153703	0.014193	0.044766	0.00123411	0.0341501	0.0184249	0.00238629	0	0.0106006	0	0
Gm29284	0.145833	0.175278	0.0721012	0.192192	0.120525	0.140408	0.430587	0.276184	0.00442955	0.0843551	0.0129696	0.320327	0.0083013	0.00471541	0.191838	0	0.253667
C130026I21Rik	1.03646	1.27915	0.908407	1.40293	0.95454	1.0103	2.16229	1.54001	1.17005	0.858273	0.467604	1.69635	0.598552	0.986847	1.17922	0.0947094	0.446165
Rpl19-ps1	0.00459259	0.00413183	0.00633274	0.00664143	0.00234255	0.0049958	0.00570297	0.00428388	0.0308385	0.00630199	0.0386732	0.00461467	0.00579121	0.0115698	0.00148034	0.0111289	0
Gm7582	0.00243666	0.00354782	0.00156747	0.00118641	0.00179431	0.00124123	0.00548067	0.00240151	0.0114614	0.00125495	0.0104264	0.00474864	0.00458136	0.00787504	0.0012562	0.00512007	0
Gm2389	0.000463095	0	0.000443833	0.000374055	0	0.000530037	0.00158289	0	0	0	0	0.00364464	0.00618212	0.00745196	0	0	0
Gm18342	0.00354988	0.0041542	0.00377488	0.00598074	0.0156482	0.0025374	0.0161712	0.0121054	0.0187086	0.000801337	0.0114573	0.00945222	0.00694571	0.0279648	0	0	0
A530032D15Rik	0.135894	0.167879	0.129246	0.267561	0.146283	0.144555	0.703025	0.319699	0.282322	0.108479	0.0691405	0.271255	0.137346	0.258634	0.110488	0.0221838	0.138194
A530040E14Rik	0.0603177	0.0840341	0.0565239	0.0674493	0.0722405	0.051555	0.124317	0.0838343	0	0.0505655	0	0.137262	0	0.00765227	0.0964326	0	0
Gm16038	0.000342348	0	0.00107425	0.00029678	0.000771928	0.000648748	0	0	0	0	0	0	0	0	0.00183046	0	0
Gm6264	0.00235711	0.00653368	0.00387453	0.00595442	0.00590173	0.0040221	0.00691715	0.00683204	0	0.000511044	0.00974774	0.00571597	0	0	0.00350342	0	0
Gm7609	0.000434812	0.000388893	0	0.000564959	0	0	0.000940175	0	0.00838712	0	0	0	0	0	0	0	0
Gm16028	0.0177434	0.0337229	0.020043	0.0381851	0.0245727	0.0187416	0.089349	0.0317607	0.0182884	0.0276378	0.00873128	0.0487211	0.0127025	0.0922866	0.0224184	0.00570916	0
Gm16026	0.00349509	0.00571426	0.00221146	0.00822252	0.0052366	0.000958475	0.0121118	0.00757794	0.00543074	0.00479416	0	0.00784097	0	0	0.00708692	0	0
Gm2666	0.000476326	0	0	0.00060866	0	0	0	0	0	0	0	0	0	0	0.00100569	0	0
Gm2427	0.000138043	0	0	0.00192312	0.002934	0.000628375	0.00124101	0.000565463	0	0	0	0	0.00259897	0	0	0	0
Sp110	0.324077	0.402349	0.250173	0.461526	0.30574	0.354137	0.695416	0.431374	0.843981	0.291857	0.424096	0.427185	0.496258	0.844918	0.301224	0.565433	0.366137
Gm16094	0.000764062	0.0014271	0.00132826	0.00114277	0.00214353	0	0.00121956	0.00135369	0	0	0	0	0	0.00330041	0.00246313	0	0
Sp140	0.602406	0.641426	0.441254	0.843279	0.540591	0.541574	1.50298	0.986908	1.62756	0.46674	0.903155	0.80064	1.20346	1.69117	0.586056	0.390293	0.527019
Gm10552	0.000278853	0	0	0	0	0	0	0.000515047	0.00982362	0.000658532	0	0	0	0.00481212	0	0	0
Gm17017	0.00137611	0.00537884	0.00201242	0.00277267	0.00250635	0.00262852	0.0051781	0.00324913	0.00833309	0.00115235	0	0.00382134	0.0170875	0.0134929	0	0	0
Sp100	1.166	1.24779	0.916348	1.50716	1.06203	1.16722	2.15118	1.60235	2.34616	1.21707	1.83301	1.28958	1.67303	2.31655	0.91888	1.43641	1.55791
A630001G21Rik	0.335117	0.418935	0.287038	0.404517	0.338834	0.310842	0.538427	0.368748	0.403105	0.425406	0.226451	0.468484	0.384012	0.705463	0.356807	0.416912	0.64635
Cab39	0.901657	0.909847	0.977738	1.05516	0.804091	0.919881	1.23069	1.05294	1.02989	0.861619	1.30354	0.923901	1.0791	1.31976	0.883643	0.920494	0.944796
Itm2c	0.666504	0.712026	0.763624	0.657507	0.823693	0.787707	0.388108	0.405235	0.217102	1.26619	0.293985	0.616439	0.208035	0.166082	0.582891	1.1623	1.41823
Gm28884	0	0	0	0	0	0	0.0383767	0	0	0.000530921	0	0	0	0	0	0	0
Gpr55	0.00109948	0.00238457	0.00162518	0.0034581	0	0.00129908	0.0934249	0.00265884	0	0.0126195	0.02032	0.0238285	0	0	0.00122334	0.056866	0
Gm18180	0.00504089	0.00602236	0.00793427	0.00869302	0.00247788	0.0054524	0.0010383	0.00984962	0.00601544	0.00641719	0.021401	0.00288104	0.0148012	0	0.00595032	0	0
Psmd1	0.747893	0.696949	0.819324	0.690874	0.80198	0.747844	0.592497	0.680141	0.305218	0.75912	0.128194	0.660883	0.582459	0.407022	0.772365	0.717865	0.254071
Gm22786	0.00221491	0.000823806	0.00280539	0.00085137	0.00543513	0.00198275	0.00248651	0	0	0.00106171	0	0.00135808	0	0.00385515	0.00177859	0	0
Htr2b	0.00270501	0.00083031	0.00115656	0.00193519	0.00260358	0.00258355	0.000987203	0.00284635	0	0.00128422	0	0.00283031	0	0	0.00308887	0.00936795	0
Gm37914	0.00431525	0.00682274	0.00857749	0.0031349	0.00810674	0.00309236	0.00217192	0.00433092	0	0.00226917	0	0.00996934	0.00153987	0	0.00279512	0.00235427	0
Armc9	0.0235088	0.0216411	0.0232413	0.0192795	0.00875401	0.0225113	0.011269	0.0167882	0	0.0237769	0.014328	0.0106453	0.00502164	0	0.0319479	0.112605	0
B3gnt7	0.00234839	0.00424624	0.00135439	0.00179819	0.00390818	0	0.00188278	0.000507101	0.0130244	0.0192503	0	0.00598335	0.00293392	0	0.00473649	0.184109	0
Ncl	2.9043	2.70992	2.93392	2.80565	2.89184	2.9752	2.28892	2.66792	1.27091	2.26385	1.41207	2.27371	1.93252	1.30648	2.72274	2.79116	1.78021
Snord82	0.000198193	0.00019113	0.000518998	0.000720321	0	0	0	0.00030296	0	0.000602172	0	0	0	0	0	0	0
C130036L24Rik	0.0296141	0.0305982	0.0443673	0.0370892	0.0368122	0.0341055	0.03116	0.0186504	0	0.0144622	0	0.0220841	0.0148813	0.00577087	0.0271199	0.0995501	0
Rpl30-ps6	0.00109171	0.00242777	0.000713232	0.00261584	0	0.00113815	0.0041245	0.00155872	0	0	0.0113248	0	0	0	0.00312485	0	0
Ptma	3.38295	3.17269	3.24745	3.19011	3.22483	3.40944	2.61326	3.30992	1.20037	2.90158	1.42394	2.77888	2.99799	1.31287	3.40388	3.13722	2.60366
Pde6d	0.574932	0.452172	0.420173	0.423709	0.518825	0.537849	0.339223	0.490722	0.364891	0.406598	0.155808	0.318247	0.616333	0.615953	0.489938	0.515524	0.32625
Gm37152	0.00190953	0.000831	0.00316081	0.00123775	0.010826	0.00375497	0.000629901	0.00162397	0	0.000691347	0	0.0048945	0.00050419	0	0.00250581	0.00194574	0
Cops7b	0.356652	0.281	0.314943	0.296991	0.288421	0.316728	0.27869	0.315813	0.126842	0.288088	0.0714657	0.236641	0.285358	0.313382	0.36003	0.341691	0.222348
Nppc	0	0	0.000363823	0.000810804	0	0	0	0	0	0	0	0	0	0	0	0	0
Dis3l2	0.103601	0.0940497	0.0889227	0.0881823	0.095378	0.0899068	0.086419	0.0784269	0.0324498	0.0946513	0	0.0770395	0.0398188	0.113925	0.0957922	0.138766	0.084391
Gm29055	0.0038154	0.00216622	0.00414045	0.0059074	0	0.00219387	0	0.00330944	0	0.00337712	0	0.000884657	0.000641047	0	0.00311524	0.00361213	0
Gm37485	0.00193628	0.000624512	0.0024389	0.000790275	0	0.003382	0.00169345	0.00243194	0	0	0	0.00123659	0.0049005	0	0.0045509	0	0
Gm38142	0.00116184	0.0014514	0.00201712	0.00106611	0.0228588	0.000933943	0.00245009	0.00161683	0	0.00152182	0	0.00483937	0	0	0.00082166	0	0
Gm38010	0.00040486	0	0.000525626	0.000666993	0.00129631	0.000659219	0.000733578	0	0	0	0	0	0	0	0	0	0
Gm37541	0.000635235	0.000450633	0	0.000414547	0	0.000340595	0	0.000592754	0	0	0	0	0	0	0.00119581	0	0
Gm38021	0.00535789	0.00455445	0.00676722	0.0080226	0.0150715	0.00747843	0.00388436	0.00341523	0.00678276	0.00423996	0.0326663	0.00862334	0.0159296	0	0.00646856	0	0
Gm6136	0.847709	0.872165	0.911647	0.876144	1.01818	0.866246	0.703272	0.730554	0.311741	0.930078	0.261898	0.838137	0.906169	0.451618	0.834678	1.43559	1.03232
Gm37967	0.0019316	0.00110494	0	0.00191396	0.00192615	0.00255623	0.00522645	0.00169218	0	0.00481586	0	0.00236913	0	0	0	0	0
Gm37017	0.00117681	0.000918882	0.000843036	0.00147432	0	0.00114439	0	0.00151241	0	0.00213305	0	0	0	0	0.00351551	0	0
Gm37447	0.00358031	0.00276514	0.0027398	0.0046772	0.00618061	0.0030773	0.00395313	0.00123433	0.00850154	0.00177027	0	0	0.00275674	0	0.00181883	0.000771841	0
Ecel1	0.00324613	0.00326309	0.00396636	0.0028784	0.0178182	0.00512048	0	0	0	0.00593615	0	0	0	0	0	0	0
Chrnd	0	0.00161378	0.000266496	0	0	0	0	0	0	0	0	0	0	0	0	0	0
Chrng	0.000307426	0.000131645	0.000418259	0.000468555	0	0.000772658	0.00124987	0.000570987	0	0	0	0	0.0041182	0.00490145	0	0.0074201	0
Eif4e2	0.590486	0.541421	0.594662	0.531561	0.592115	0.565624	0.513353	0.530075	0.534302	0.638644	0.401702	0.546757	0.520696	0.615531	0.568809	0.700432	0.97915
Efhd1	0.00415403	0.00424205	0.0040774	0.00433408	0.00394482	0.00491924	0.000609469	0.00330002	0	0.00175284	0	0.000697037	0	0	0.00367151	0.00478531	0
Gigyf2	0.584256	0.522646	0.554639	0.526717	0.552922	0.489259	0.510193	0.543527	0.701465	0.484297	0.643019	0.505444	0.485764	0.621956	0.550419	0.583705	0.693343
Kcnj13	0.000115807	0	0.000769241	0.00115101	0	0	0	0.00126222	0	0	0	0	0	0	0	0	0
Gm23504	0.00034831	0	0.000635661	0	0	0.000271556	0.00186245	0	0	0	0	0	0	0	0	0	0
Gm6153	0.00186371	0.00254073	0.00218146	0.00176443	0	0.000825194	0.000750364	0.000810421	0	0.00328192	0	0	0	0	0.000864843	0.00393899	0
Inpp5d	0.456239	0.50282	0.44278	0.464883	0.513325	0.42368	0.514377	0.490982	1.10638	0.680808	1.28815	0.626248	0.646486	0.837034	0.492675	0.669847	1.20186
Atg16l1	0.112658	0.118022	0.131492	0.127602	0.200164	0.131751	0.133434	0.119168	0.141695	0.155106	0.239563	0.165742	0.193957	0.250301	0.122129	0.152371	0.26761
Gm25395	0.00077804	0	0.00146992	0.00144989	0	0.00095986	0.000598384	0.00125307	0.00614475	0.00149754	0	0	0	0.00465531	0	0	0
Scarna6	0.0007745	0.000253464	0.000695064	0	0	0.000404201	0	0	0	0.000881499	0	0	0	0	0	0	0
Sag	0.0125064	0.0207982	0.0177517	0.0179235	0.0213064	0.0106244	0.02236	0.010879	0.0409613	0.00870209	0.169367	0.0215732	0.0167735	0.0341409	0.0388653	0.0260045	0
Dgkd	0.274806	0.351375	0.271335	0.275217	0.264182	0.309531	0.31712	0.275122	0.499498	0.353971	0.577205	0.496859	0.482007	0.584833	0.404726	0.537207	0.373245
Gm19582	0.000525805	0.00327761	0.000373689	0.00179672	0	0.000342644	0.000556647	0.00126568	0	0	0	0.00421932	0	0	0.000980232	0	0
4833421G17Rik	0.00700198	0.00267836	0.00426373	0.00468449	0.00376275	0.00488677	0.00636241	0.00488215	0	0.00354309	0	0.0049986	0.000793837	0	0.00325647	0.00588169	0
Gm38365	0.00988028	0.00954904	0.0114426	0.0100441	0.0134243	0.00957412	0.00929834	0.0104439	0.0326959	0.00874493	0.0293562	0.0166514	0.0127067	0.0112373	0.0224086	0.0065467	0
Usp40	0.0329282	0.0472038	0.0372912	0.0261984	0.0195177	0.0256721	0.0404262	0.010216	0.0120642	0.0413955	0.160023	0.0644566	0.0185972	0.0252548	0.0464689	0.0944977	0.104391
Ugt1a7c	0.0166562	0.0309139	0.0228461	0.00295007	0.033611	0.0234234	0.00825431	0.00486579	0.0761942	0.11321	0.164667	0.086978	0.039688	0.0349019	0.0381848	0.0161137	0
Ugt1a6b	0	0.00176728	0	0	0	0.000279767	0	0	0.00480977	0.00377745	0	0.00131263	0	0	0	0	0
Ugt1a6a	0.00537469	0.0136446	0.00825572	0.00207446	0.0124327	0.0112211	0.00907463	0.000829158	0.0617855	0.0364468	0.08854	0.0405589	0.00854041	0.0258362	0.0158911	0	0.0519749
Ugt1a5	0.000250286	0	0.00034426	0	0.00345471	0	0	0	0	0.00383169	0	0	0	0	0	0	0
Gm15368	0	0.000801777	0.000342897	0	0.00736722	0	0	0	0	0.00177726	0	0.00511259	0	0.00899437	0.00110276	0	0
Dnajb3	9.83e-05	0	0.000333926	0.000543029	0	0	0	0	0	0.00148208	0	0	0.00123086	0.0084296	0	0.032704	0
Mroh2a	0.195776	0.119768	0.108214	0.150538	0.217835	0.225719	0.163963	0.211586	0.278254	0.0843003	0.167873	0.0733671	0.306019	0.207697	0.213113	0.0922818	0.061758
Hjurp	0.995324	0.680801	0.504495	0.791321	1.10118	1.04657	0.718856	1.06079	0.613111	0.569848	0.36445	0.391191	0.984003	0.546036	1.02215	0.457264	0.0489255
Gm29336	9.6e-05	0	0.000585188	0.000302597	0	0.000392921	0.00377529	0.000563596	0.00502482	0.00379784	0.0104384	0.00112235	0	0	0.00274043	0.0035068	0
Arl4c	0.33663	0.682577	0.221324	0.304634	0.38476	0.243998	1.21758	0.640717	1.99005	1.01486	2.37066	1.38111	0.337951	0.536911	0.896678	1.33513	1.8512
1700067G17Rik	0.000181236	0.00116555	0	0	0	0	0	0.000816493	0	0.00047689	0	0.00101536	0	0	0	0	0
Sh3bp4	0.000195573	0.00203184	0.0010213	0	0	0	0.0012482	0.000531981	0.00321778	0.0216884	0	0.00132457	0	0	0.00618383	0	0
Gm38312	0.00445121	0.00391661	0.00597244	0.00623827	0.0036132	0.0111917	0.00301343	0.00222938	0	0	0	0	0	0	0.00455041	0.00209241	0
Agap1	0.244529	0.185992	0.127219	0.255053	0.197366	0.19783	0.637973	0.538311	1.6843	0.142745	1.36869	0.266775	1.15656	1.29744	0.241862	0.205833	0.200056
Gm37297	0.00140374	0	0	0.000324051	0	0.00040327	0	0	0	0	0	0	0	0	0.0008432	0	0
Gm25180	0	0.000341923	0	0	0	0	0.00340374	0.00252101	0.0582545	0	0.0776967	0	0.00578485	0.0824848	0	0.00175125	0
Gm28499	0.000997544	0.000205714	0	0.00179457	0	0	0.0245295	0.00145465	0.166522	0.00135517	0.344053	0.00373462	0.00921365	0.0665094	0	0.00135019	0
4933400F21Rik	0.00229639	0.00229064	0.000249	0.00188693	0.00633984	0.00064274	0.00697983	0.00572881	0.00471275	0	0	0.00375312	0.00744155	0.0145468	0.00568612	0	0
Gm37521	0	0.000355172	0	0	0	0.00211132	0.0010405	0.000972287	0	0	0	0	0.000761837	0	0	0	0
Gbx2	0	0	0	0	0	0	0	0	0	0	0	0	0	0	0	0.0210713	0
D130058E05Rik	0	0	0.000197856	0.000182266	0	0	0	0	0	0.00343412	0	0	0.0030712	0.00391278	0	0.0915858	0
Asb18	0.000140521	0	0.000419685	0	0	0.000282706	0	0	0	0	0	0	0	0	0	0	0
Iqca	1.54984	2.03888	1.63792	1.57525	1.63442	1.72334	1.33108	1.50218	0	1.43503	0	2.27374	0.0748624	0.00393604	1.87032	0.00835067	0.817577
4930434B07Rik	0	0.000108922	0	0	0	0.000478145	0	0	0	0.00129637	0	0.00295036	0	0	0.00158464	0	0
Ackr3	0.00121992	0.00140123	0.00104927	0.000389239	0.0204393	0.000471894	0	0	0	0.223842	0	0.0137046	0	0	0.00923754	0	1.42473
Cops8	0.717784	0.687154	0.732116	0.756823	0.652809	0.732249	0.918311	0.773556	0.616771	0.568131	0.319906	0.730476	0.845445	0.755342	0.628194	0.514222	0.491148
Col6a3	0.102047	0.143874	0.113743	0.113432	0.304832	0.124813	0.219637	0.0816429	0.250295	0.110921	0.628031	0.240914	0.0537946	0.0846764	0.105202	0.25619	0.403227
Gm36970	0.00168915	0.00131583	0.00223312	0.000267361	0.00800389	0.00207703	0.00213019	0.000686579	0.00439768	0.00244015	0	0.00129384	0	0	0.000771592	0	0
4930474B08Rik	0.000156157	0.000759804	0	0	0	0.000552087	0	0	0	0	0	0	0	0	0	0	0
Mlph	0.119417	0.212194	0.144686	0.143843	0.154114	0.148342	0.0657031	0.0626402	0	0.17477	0	0.262844	0.00104534	0	0.172774	0	0.0984796
Prlh	0.000686734	0	0.000962909	0	0	0	0	0.00035377	0	0	0	0	0	0	0	0	0
Rab17	0.000951065	0.00140507	0.00203201	0.00181288	0	0.000377186	0	0.000619544	0.0121172	0.00413176	0	0.00119859	0.0217559	0.00145673	0	0.0426304	0
Lrrfip1	0.699389	0.863636	0.740569	0.831823	0.796366	0.687022	1.20356	0.800921	2.20949	0.957383	2.00421	1.11196	1.37428	1.95488	0.886096	1.12912	1.60978
Rbm44	0.00196404	0.00369863	0.000752993	0.00429862	0.000921624	0.00366832	0.00387623	0.00100203	0	0	0	0.00103787	0	0	0.00131687	0.0112596	0
Gm7776	0.0173725	0.0210658	0.0242337	0.0239876	0.0633952	0.0226039	0.0168447	0.0221115	0.0864152	0.0419932	0.13981	0.0231013	0.078562	0.102551	0.0112584	0.113874	0.0817818
Ramp1	0.91908	0.784045	0.960915	0.850826	0.970917	1.06344	0.426182	0.485783	0.0966309	0.568123	0.0733131	0.3761	0.557998	0.220536	0.551947	1.00812	0.087043
Ube2f	0.405215	0.438653	0.485388	0.39858	0.457479	0.360999	0.498463	0.421608	0.542564	0.502679	0.281789	0.465102	0.615963	0.668722	0.397456	0.548962	0.794866
Gm7785	0.181151	0.176585	0.191138	0.180785	0.14608	0.177511	0.119081	0.178837	0.0469226	0.155598	0.0324675	0.157545	0.0429167	0.0759689	0.160419	0.132871	0.186719
Gm26683	0.00174298	0.00291912	0.00136191	0.00165354	0	0.00168128	0.00406006	0.000590296	0	0.00632655	0	0.00350553	0.00189566	0.00466118	0	0	0
Scly	0.429375	0.467154	0.405666	0.437348	0.436012	0.478055	0.276169	0.389185	0.0738403	0.338422	0.118746	0.384511	0.239983	0.203055	0.474619	0.344477	0.0576372
Gm17090	0.00166325	0.00127719	0.00380385	0.00176684	0	0.00354032	0.00196776	0.00124393	0	0.00181675	0	0	0	0	0	0	0
Espnl	0.0750775	0.0873364	0.0886344	0.0851082	0.112549	0.0810102	0.0517041	0.0620815	0	0.0339007	0	0.0604615	0	0	0.0499713	0.00255163	0.133602
Klhl30	0.000268846	0	0.00132634	0	0	0	0	0.00326515	0	0	0	0.00115204	0	0	0	0.0255943	0
Erfe	0.000314244	0	0	0.000365132	0	0	0	0	0	0	0	0	0.0219022	0	0	0	0
Ilkap	0.416615	0.411354	0.419403	0.408086	0.495648	0.438243	0.374057	0.40503	0.471483	0.351201	0.623786	0.34127	0.482118	0.475462	0.386364	0.446235	0.20125
Hes6	0.416427	0.402626	0.516935	0.39203	0.388241	0.490236	0.356948	0.272975	0.346243	0.382082	0.365492	0.296475	0.344963	0.520828	0.298517	0.607207	0.59656
Per2	0.0524841	0.0432596	0.0480598	0.0673178	0.0298832	0.058242	0.190087	0.0570711	0.247903	0.0310437	0.195914	0.0712231	0.32987	0.451941	0.0673823	0.128975	0
Traf3ip1	0.107104	0.0926422	0.0925871	0.0976384	0.0831725	0.0934449	0.0650064	0.0779441	0	0.0876927	0.0460448	0.0669182	0.0410477	0.00744744	0.0834498	0.10976	0.0671161
Asb1	0.153315	0.116833	0.136324	0.153032	0.220955	0.109374	0.145872	0.178783	0.039184	0.0639237	0.0526882	0.114009	0.144442	0.0842495	0.131538	0.25528	0
Hdac4	0.259309	0.302382	0.15203	0.295622	0.295105	0.220698	0.605076	0.366528	1.19133	0.226687	1.2957	0.424796	0.398433	0.67381	0.300924	0.235083	0.389382
Gm37048	0	0	0	0	0	0.000327789	0	0.0010345	0	0	0	0	0.000571449	0	0	0	0
Gm37036	0	0	0.000189664	0	0	0	0.000577358	0	0	0.000691347	0	0	0.00144657	0	0	0.0193186	0
Ndufa10	0.951376	0.917784	1.00402	0.890366	0.946773	0.981905	0.61098	0.753469	0.456285	0.961351	0.171468	0.785431	0.712399	0.745519	0.90443	1.0274	0.474546
Olfr12	0.000146996	0.00177783	0.00256048	0.000945236	0.00312384	0.00201245	0.00428749	0.0048603	0	0.00190641	0	0.0079375	0	0	0.00106302	0	0
Cops9	1.01261	1.03884	1.03376	1.0469	0.976183	1.02234	1.1333	0.997459	0.94238	1.07578	0.639129	1.0274	1.16324	1.4091	0.967319	1.06403	1.17877
Otos	0.0231416	0.0130711	0.0210088	0.0190141	0.0247448	0.00988141	0.00656077	0.0269137	0	0.0123882	0.00995333	0.00388686	0.00164433	0.0141856	0.011374	0.0558258	0
Gm29483	0.00165288	0.0021538	0.00188556	0.00190034	0.00221106	0.00362969	0.000569082	0.000612977	0	0	0	0	0.00214414	0	0	0	0
Gpc1	0.109172	0.148005	0.0844894	0.082463	0.129922	0.114205	0.113568	0.0833378	0.138104	0.0725795	0.0255204	0.128251	0.247187	0.151886	0.134011	0.0528151	0
Gm29480	6.67e-05	0	0	0	0.00344235	0.000726603	0	0	0	0.00471985	0	0.00144869	0.00101014	0	0	0	0
Dusp28	0.0922681	0.101578	0.0935052	0.102606	0.106485	0.0924783	0.116283	0.103548	0.0344388	0.0807909	0.0425741	0.0703016	0.0849475	0.0548813	0.0916402	0.059905	0
5033417F24Rik	0.00291313	0.00402867	0.00107697	0.00455892	0.00413053	0.00147664	0.0038756	0.00199881	0.00604403	0.000909568	0.0139755	0.0105422	0.00322577	0.0223164	0.00200773	0.00134015	0
Rnpepl1	0.279483	0.322675	0.292152	0.329473	0.349704	0.277941	0.41417	0.304433	0.728383	0.386006	0.618329	0.351103	0.522189	0.595917	0.242959	0.401067	0.521998
9430060I03Rik	0.0105645	0.00749594	0.0078835	0.00982178	0.0090138	0.0107429	0.0106157	0.0114654	0.0480455	0.0067297	0.0791276	0.0113633	0.00437117	0.0488248	0.00527511	0.00477578	0
Capn10	0.0895778	0.0862388	0.0691296	0.0779966	0.0871794	0.0852081	0.0719594	0.0731226	0.0303757	0.0926566	0.0169012	0.073594	0.0740362	0.14415	0.0938648	0.0604456	0.0411559
Gpr35	0.000910895	0.00149307	0.000253566	0.00113374	0.0492512	0.000638023	0.00220127	0.00107008	0.0230323	0.539444	0.539592	0.024381	0.00745747	0.00386757	0.00187468	0.0678599	1.12241
Kif1a	0.00118392	0.00106533	0.00369396	0.0044283	0	0.000357184	0.00422033	0.00287175	0	0.0138046	0	0.0028098	0	0	0.00161235	0	0
Gm28086	0.00916548	0.00835106	0.0095696	0.0146688	0.00397722	0.00929577	0.00220023	0.00381633	0	0.00129538	0	0.00349858	0.00977159	0	0.00255597	0	0
2310007B03Rik	0.00127252	0.00228044	0.00549061	0.00118059	0.00681065	0.00653249	0	0	0	0.00416013	0	0.00280102	0.000662105	0	0	0	0
Sned1	0.0110513	0.0216863	0.0116424	0.0258906	0.0226217	0.0177154	0.0474399	0.0306779	0.139402	0.00320448	0.0357147	0.0165332	0.0483989	0.0967652	0.0121523	0.00737472	0
Mterf4	0.115507	0.116409	0.111346	0.111848	0.124415	0.0823299	0.14392	0.107326	0.194371	0.0775133	0.117407	0.0790776	0.189345	0.277627	0.100055	0.096262	0
Gm28535	0.000494976	0.000277393	0.000569267	0.00108576	0.00598902	0	0.000718025	0	0	0	0	0	0	0	0	0	0
Gm7867	0.00177751	0.000744572	0.000208624	0.00303565	0.0124009	0.00265575	0.0013993	0.00144948	0	0.000458832	0	0	0	0	0.000641602	0	0
Pask	0.156306	0.129549	0.073272	0.158286	0.213696	0.266205	0.145173	0.231915	0.0237064	0.0869839	0	0.0586687	0.213868	0.0237388	0.157873	0.0780113	0
Ppp1r7	0.556076	0.460299	0.475817	0.486332	0.472931	0.557523	0.392604	0.567188	0.238521	0.467834	0.173692	0.389772	0.453423	0.248633	0.561323	0.579617	0.378687
Gm26446	0.00031032	0	0.000316037	0.000335008	0	0	0	0.000837861	0	0	0	0	0	0	0	0	0
Ano7	0.00772993	0.0187486	0.0197994	0.029293	0.0263397	0.0167408	0.0277153	0.00850583	0	0.00915866	0	0.011157	0.00390803	0	0.00379168	0.0103	0
Hdlbp	1.65844	1.6572	1.75308	1.65786	1.69601	1.73457	1.39298	1.37191	0.91959	1.57877	0.626669	1.5068	1.06101	0.796997	1.60182	1.21789	1.0175
Gm17415	0.000499103	0.00104685	0	0.00136922	0	0	0.00425176	0	0	0	0	0.00142663	0	0	0.00106302	0	0
2025-09-02	1.27702	1.33199	1.26152	1.22803	1.25036	1.30473	1.10078	1.20529	0.851555	1.28501	0.754863	1.27589	0.898417	0.776609	1.29079	1.00617	1.15315
Farp2	0.0108018	0.00955969	0.00990092	0.0120536	0	0.0157871	0.00914654	0.00740967	0	0.00578628	0	0.00420615	0	0	0.00877217	0.0171633	0
Gm37250	0.000382896	0	0.00021585	0.000485499	0	0.00107928	0	0	0	0	0	0	0	0	0	0	0
Stk25	0.11885	0.115616	0.106809	0.105031	0.163403	0.106812	0.109209	0.123085	0.0686184	0.109607	0.0632209	0.101384	0.127057	0.072465	0.109391	0.139283	0.0340699
Gm28536	0.000143074	0.000475161	0.00131443	0.000720878	0	0	0	0.000399047	0	0	0	0	0	0	0	0	0
Bok	0.000156209	0	0	0	0	0	0	0	0	0	0	0.0035106	0	0	0	0.012462	0
Thap4	0.314481	0.303314	0.330664	0.303873	0.235596	0.328258	0.400624	0.257356	0.547072	0.246714	0.244904	0.34865	0.321862	0.441413	0.267475	0.333068	0.380555
Gm10550	0.00169917	0.000399438	0.00070312	0.000610846	0	0.000300524	0	0.000716408	0	0.000411183	0	0	0.00153041	0	0	0	0
Atg4b	0.239458	0.207411	0.218716	0.196434	0.251277	0.21179	0.248648	0.213048	0.392398	0.253641	0.294261	0.214865	0.288336	0.389638	0.213545	0.306789	0.506058
Dtymk	1.1259	0.950121	0.929267	1.11604	1.08505	1.27847	0.861401	1.15846	0.162925	0.665803	0.0889607	0.59732	1.06619	0.345899	1.04208	0.879498	0.225803
Ing5	0.351727	0.283561	0.294632	0.325138	0.355871	0.345045	0.326515	0.339192	0.521471	0.278503	0.246347	0.187701	0.358885	0.222743	0.281444	0.373686	0.414196
D2hgdh	0.0237554	0.0221312	0.0157886	0.0214925	0.0175281	0.0234064	0.0311506	0.0205241	0.0738232	0.0178032	0.0586473	0.0198816	0.0261512	0.0422203	0.0192048	0.0169267	0.0805283
Gal3st2	0	0.00078701	0.00095309	0.000425601	0	0.000259365	0	0.000525233	0	0	0	0	0	0	0.00131513	0	0
Gal3st2b	0.000500855	0.000757822	0.00107359	0.000922085	0.00318545	0	0	0	0	0	0	0	0	0	0.00111166	0.00688637	0
Gm7889	0.00181594	0.00158363	0.00501283	0.00208641	0.010637	0.00287239	0.00314343	0.00255027	0.0082329	0.00242807	0	0.0028782	0	0	0.0123967	0	0
Gm7895	0.0144403	0.0129022	0.0164064	0.0154869	0.0255985	0.00864813	0.0164282	0.0139129	0.0267053	0.010255	0.0152741	0.0138032	0.0184675	0.00792819	0.0130092	0.0198546	0
Gm5264	0.00116773	0.000441482	0.00146371	0.00216226	0	0.00159411	0	0.0011844	0	0.00160668	0	0.00067306	0.000897035	0	0	0	0
Fam174a	0.62883	0.771556	0.58921	0.649265	0.587308	0.661758	0.655624	0.633741	0.231479	0.896712	0.638638	0.937318	0.311137	0.238294	0.657541	0.392572	1.13482
BC055308	0.00901892	0.0178047	0.0110543	0.0117787	0.0200065	0.0113397	0.0232087	0.0176785	0	0.0153868	0.00987237	0.0270834	0	0	0.0106288	0.0186111	0.18918
Gm15427	0.853408	0.89711	0.907256	0.867846	0.866819	0.867979	0.741509	0.764045	0.322928	0.867082	0.326161	0.883163	0.510895	0.28506	0.845378	0.976988	0.694575
St8sia4	0.84441	1.03406	0.82275	0.641468	0.931201	0.91001	0.42327	0.51245	0.432983	1.22589	1.46809	1.213	0.0909771	0.0502736	0.974267	0.780316	1.54263
Gm37642	0.00581136	0.00965431	0.00906658	0.00253462	0.00688242	0.00528001	0.00398845	0.00363995	0.00885805	0.00550871	0.0138077	0.0118252	0	0	0.00777823	0.03444	0
Gm1833	0.00020964	0.000388434	0.000640863	0	0	0.00208004	0	0.000416806	0	0.000842906	0	0	0	0	0.00218711	0	0
Slco4c1	0.135231	0.201962	0.145697	0.370331	0.141027	0.140909	0.848942	0.424671	1.02285	0.0295206	0.692768	0.175179	0.81703	1.25311	0.11266	0.0209451	0.10782
Panct2	0.125308	0.15416	0.122571	0.239134	0.145505	0.123456	0.485604	0.212547	0.368782	0.0181189	0.208447	0.196392	0.337898	0.515526	0.117892	0.0406173	0
Gm28901	0.00327203	0.00125305	0.00127712	0.00116348	0	0.00143276	0.00142016	0.00133012	0	0.00047689	0	0.00404494	0.0143565	0	0.0043701	0	0
Gm6430	0.184134	0.181578	0.195841	0.173108	0.221168	0.200379	0.18001	0.189106	0.0272432	0.169864	0.0807285	0.15932	0.0917378	0.0684187	0.211441	0.0964665	0.123556
Gm7135	0	0.000272203	0	0.000260623	0	0	0	0	0.0161658	0.000580181	0.0145935	0	0	0	0	0	0
D1Ertd622e	0.346511	0.598538	0.351823	0.517012	0.381739	0.44956	0.905514	0.544909	1.51184	0.728346	1.73842	0.758669	0.486596	0.746187	0.494447	0.243149	0.9512
Ppip5k2	0.507735	0.420343	0.494854	0.474795	0.532018	0.510103	0.315035	0.432972	0.198441	0.420844	0.118535	0.349992	0.387626	0.215408	0.405417	0.357356	0.478188
Gin1	0.193252	0.151143	0.14357	0.152025	0.253824	0.156745	0.12249	0.16668	0.0617878	0.141154	0.025412	0.15265	0.204192	0.1045	0.186999	0.177943	0.0295213
Pam	0.295758	0.236486	0.193491	0.273473	0.218022	0.314913	0.265216	0.280686	0.354465	0.149072	0.125774	0.184136	0.403612	0.513743	0.18683	0.313262	0.0708915
Gm37140	0.00239941	0.000582311	0.00183238	0.00155984	0.00304433	0.000384502	0.000690644	0.000467881	0	0.00112259	0	0.000726982	0.00361145	0.0139676	0.00819572	0.00244716	0
Gm3531	0.434113	0.444309	0.479389	0.441736	0.485527	0.440756	0.344837	0.368498	0.207231	0.390117	0.16402	0.409104	0.357466	0.233027	0.425166	0.479037	0.179419
B230216N24Rik	0.0334918	0.0437475	0.0379943	0.0514896	0.0251383	0.0397658	0.0847749	0.0368986	0.105286	0.0109284	0.0344062	0.0315377	0.0620342	0.113252	0.0314158	0.00907338	0.0363453
1810006J02Rik	0.230947	0.241669	0.144343	0.32703	0.0950001	0.186446	0.564743	0.389102	0.0328302	0.00512779	0.0166475	0.216359	0.0345568	0.106165	0.203806	0.00527678	0
Gm29462	0.0195234	0.0120274	0.0160297	0.0202902	0.027483	0.0204973	0.0187764	0.016951	0.0367365	0.0184536	0.03333	0.0174844	0.020097	0.0197469	0.0276829	0.0357361	0
Gm3555	0.0015745	0.0017825	0.00164545	0.000754247	0	0.00369229	0.00739028	0.00278751	0.00871059	0.00348723	0.0114534	0.00331437	0.00125636	0	0.00194498	0	0
Gm7967	0.108896	0.194252	0.236782	0.172378	0.138697	0.125488	0.174271	0.0733867	0	0.0805743	0	0.253653	0	0.00145673	0.109668	0.0593011	0.0936494
Gm29460	0.000193162	0	0.000932306	0.00193547	0	0	0.00108743	0	0	0	0	0	0	0	0	0	0
Tdpx-ps1	0.159603	0.166044	0.184644	0.146912	0.195158	0.166734	0.0930961	0.0954648	0.0105683	0.181163	0	0.144533	0.0225846	0.0196412	0.115711	0.503689	0.175962
Gm29668	0.00335691	0.00544588	0.00320155	0.00224858	0.00303768	0.00276747	0.00819488	0.00262473	0.0251633	0.00148676	0	0.00414615	0.00947788	0	0.00207355	0	0
Gm29667	0.000159578	0.000900863	0.000393999	0.000725149	0	0.0007555	0.00111525	0	0	0.00194114	0	0	0.00090936	0	0	0	0
Psmb6-ps2	0.0258897	0.0183783	0.0195455	0.0191865	0.0153523	0.0153187	0.00540499	0.0173009	0.0423541	0.0236348	0.0159929	0.0138472	0.0181939	0.0150716	0.0282491	0.0245189	0.115107
Gm28188	0.00099395	0.00623063	0.00769633	0.0049071	0.0133275	0.00585249	0.0123144	0.0024037	0	0.000679473	0	0.00124196	0.00081618	0	0.002168	0.0833889	0
Gm28187	0.00862779	0.0472416	0.048572	0.0474157	0.0670114	0.0186855	0.0782415	0.0135983	0.0236194	0.012682	0	0.0475	0.0316282	0	0.0181073	0.115377	0
Gm20281	0.00057601	0.00109438	0.000769229	0.00095964	0	0.000319511	0.00120813	0	0	0	0.0124594	0	0.00616857	0.0121611	0.000964078	0	0
Gm5260	0.000265192	0	0	0	0	0	0	0	0	0	0	0.00149157	0	0	0	0	0
Rnf152	0.0210041	0.0196656	0.00884581	0.0312383	0.0300577	0.0217557	0.0732096	0.0425402	0.00402938	0.0108237	0	0.0181278	0.028605	0.0157198	0.0189784	0.00856018	0
Gm28403	0.0277916	0.0124197	0.0154349	0.00858652	0.0334632	0.0220617	0.00154611	0.00535022	0	0.00918123	0	0	0	0	0.0094442	0	0
Gm3608	0.629573	0.615552	0.563757	0.640032	0.586234	0.58864	0.878337	0.72779	1.64731	0.648358	1.41223	0.675622	0.865416	1.13067	0.604404	0.543415	0.64395
Pign	0.40794	0.340849	0.347276	0.345956	0.321516	0.410796	0.322186	0.360407	0.248161	0.27484	0.185072	0.277648	0.24681	0.34668	0.373559	0.360195	0.173853
Gm28404	0.027389	0.0200961	0.0271263	0.028094	0.0135589	0.0228992	0.0178958	0.0226378	0.0248483	0.0242183	0	0.0296446	0.022345	0.00872431	0.0243404	0.00338446	0
2310035C23Rik	0.261691	0.27984	0.296447	0.299616	0.291497	0.240405	0.301318	0.275663	0.344947	0.320752	0.425586	0.297229	0.308572	0.319756	0.269055	0.314092	0.583649
Gm37566	0.00376035	0.00641365	0.00546929	0.00684836	0.00121969	0.00488657	0.00219423	0.00649353	0.00675466	0.00206319	0	0.00282878	0.00182246	0.00505975	0.0104145	0.00475803	0
Gm10193	0.0169831	0.0176802	0.0281981	0.0197803	0.0199547	0.0196107	0.0139217	0.0247341	0	0.0109697	0	0.0137326	0.0180549	0.011438	0.0165816	0.0126636	0
Tnfrsf11a	0.00129578	0.000675604	0.0010951	0.00060989	0.0098265	0.0023143	0	0.000703934	0.00472912	0.0462706	0.0147309	0.00531053	0	0	0.00344012	0.0115915	0.0616542
Gm7160	0.0201336	0.0430679	0.0320257	0.0275289	0.0464175	0.0168934	0.0681167	0.0197744	0.23373	0.0363689	0.359706	0.0683846	0.0527865	0.0710273	0.0261121	0.0711241	0
Zcchc2	0.191685	0.222769	0.211098	0.223431	0.205051	0.228423	0.289519	0.21226	0.68464	0.214504	0.6527	0.27142	0.233958	0.304873	0.201461	0.262342	0.527606
Gm37372	9.46e-05	0	0.000376166	0	0	0	0	0	0	0	0	0	0.00210919	0	0	0	0
Gm20753	0	0.000350864	0.000433768	0.00118819	0	0.000358515	0	0	0	0	0	0.00345593	0	0	0	0	0
Phlpp1	0.0605583	0.0648798	0.0528328	0.0673925	0.0748739	0.0624646	0.0650883	0.0632312	0.0174642	0.0521629	0.0579295	0.0793586	0.0776248	0.00788921	0.0688172	0.165942	0.0847702
Gm38235	0.000203585	0	0.00048732	0.000432626	0.00453878	0	0	0.000748945	0	0	0	0	0	0	0	0	0
Gm6651	0.00151597	0.00118094	0.00047829	0.0025448	0	0.00185614	0.00146029	0.00290545	0	0	0	0.00158258	0.00950819	0.00613326	0.000671576	0	0
Bcl2	0.0805625	0.0457493	0.0583915	0.0316928	0.136531	0.0667592	0.0158411	0.0211816	0.0491337	0.0811469	0.0112395	0.0340443	0.0586888	0.0294586	0.0519478	0.992808	0.690927
D630008O14Rik	0.000441938	0.000463721	0	0	0.000689938	0	0	0	0	0	0	0	0	0	0	0.00368948	0
Kdsr	0.562525	0.437353	0.54715	0.480874	0.50462	0.519722	0.340163	0.427649	0.0412702	0.301586	0.0374222	0.303303	0.209374	0.242813	0.457791	0.54395	0.537757
Vps4b	0.843085	0.817577	0.826865	0.815473	0.797224	0.751558	0.955446	0.883749	1.11071	0.794261	1.19196	0.833299	0.726297	0.949748	0.857958	0.81937	0.870188
Serpinb5	0.000103001	0	0.000346258	0.000489256	0	0.000388668	0	0	0	0	0	0	0	0	0	0	0
Serpinb12	0.000839683	0.00274641	0.000631764	0	0	0.000736488	0	0	0	0.00293407	0	0.004019	0.00174275	0	0	0	0
Gm15388	0.000103108	0	0.00111594	0	0	0	0	0	0	0	0	0	0	0	0	0	0
Serpinb2	0.00068383	0.0103027	0.000360234	0.00506792	0.00108284	0.00079214	0.0383738	0.0114563	0.00596352	0.000535961	0	0.0303804	0.00664802	0.00627952	0.0116314	0.069014	0
Serpinb10	0.0742785	0.118254	0.0176877	0.218913	0.114542	0.057326	1.27777	0.51792	1.47324	0.341562	0.192082	0.381066	1.2685	1.81728	0.0840583	0.374512	0.677636
Serpinb8	0.00711668	0.019614	0.00332636	0.00659734	0.0258047	0.00960444	0.0116991	0.00504543	0.00898427	0.196787	0.00987237	0.193841	0	0	0.113806	0	0.239802
Gm8141	0.000103745	0.000282256	0.000491987	0.000176746	0	0.000411433	0	0.000599368	0	0	0	0	0	0	0.000677107	0	0
Cdh7	0.000880668	0.002582	0.00134246	0.00142648	0.000375627	0.00529729	0.00143284	0.000884733	0	0.00140291	0	0.00378363	0	0	0.00242876	0	0
Gm8173	0.000953365	0.00100679	0	0.000850463	0	0.000462814	0	0.00230568	0	0	0	0	0	0	0.00115601	0	0
Dsel	0.0281995	0.0409046	0.0486843	0.0537003	0.0602288	0.0412454	0.024449	0.0245689	0	0.0363073	0	0.0441189	0.00679964	0	0.0344673	0.0382278	0.043109
Gm6028	0.000174115	0	0.000381554	0	0	0	0.000453566	0	0	0.00104905	0	0	0.00170612	0	0.000999275	0	0
Gm17752	0.000569504	0	0	0.000410493	0	0	0	0	0	0.000283129	0	0.000740731	0	0	0.00164529	0	0
Gm19086	0	0	0.00039753	0.000397901	0	0	0	0	0	0	0	0	0	0.0020391	0	0	0
Gm4854	0.0114467	0.00882578	0.0113261	0.0184547	0.0315595	0.0166362	0.0166978	0.0153826	0.0147406	0.00399879	0	0.000970784	0.051655	0.0764279	0.004239	0.0018077	0
Gm29106	0.00131009	0.000473177	0	0.000366186	0	0.000274231	0.00100328	0.00116801	0	0	0	0	0	0	0	0	0
Gm7200	0.00104202	0.000300661	0	0	0	0.000279145	0	0.000426559	0	0	0	0	0	0	0	0	0
Tsn	1.22617	1.16036	1.20674	1.15242	1.19593	1.21963	0.978507	1.15945	0.488112	1.11212	0.309312	1.07735	0.974228	0.884453	1.2392	1.36811	1.02827
Nifk	0.560361	0.5004	0.547951	0.529788	0.539078	0.578917	0.290388	0.432096	0.0743629	0.414907	0.0904365	0.33574	0.232411	0.270183	0.371145	0.621256	0.347765
Clasp1	0.335081	0.30828	0.253007	0.360324	0.292541	0.353593	0.424652	0.413189	0.629697	0.297302	0.321058	0.297409	0.540444	0.471759	0.336807	0.477613	0.30775
2900060B14Rik	0.0220988	0.0157246	0.0248851	0.0164129	0.0631313	0.0210193	0.0102212	0.0103956	0.0223102	0.0171601	0.0205359	0.011384	0.0617446	0.024668	0.00934366	0.0404092	0
Tfcp2l1	0.00256715	0.00384228	0.00174578	0.00231388	0.00630344	0.000635129	0.00277868	0.00144127	0	0	0	0.0024809	0	0	0.00982477	0	0
Gm3508	0	0.000286661	0.000324213	0	0	0	0	0	0	0.00047689	0	0	0	0	0	0	0
Ralb	0.627573	0.713187	0.695186	0.669134	0.654999	0.593049	0.946197	0.733273	1.73593	1.02748	1.63192	0.881745	1.03378	1.53476	0.706838	0.199069	0.848506
Gm27184	0.0117451	0.0135857	0.0147171	0.0172898	0.00762237	0.00894806	0.0241029	0.0100058	0	0.0117299	0	0.0100498	0.0040476	0.0194386	0.00573478	0.0356635	0
Tmem185b	0.396478	0.419802	0.370799	0.388053	0.432779	0.346267	0.427668	0.378545	0.595774	0.433016	0.784803	0.488524	0.288026	0.558575	0.390024	0.347005	0.462355
Epb41l5	0.0351407	0.0217309	0.0274069	0.0354099	0.0174309	0.0370129	0.0980802	0.0376178	0	0.00284521	0	0.00723595	0	0	0.0143974	0.0241413	0
Gm37219	0.000136393	0	0.00130614	0.000386294	0	0.000703806	0	0.00309998	0	0	0	0	0	0	0.000641602	0	0
Ptpn4	0.134987	0.13467	0.120776	0.147233	0.126528	0.13929	0.134944	0.148366	0.00859199	0.106908	0	0.11425	0.0646158	0.0152551	0.14	0.113174	0.11406
Gm3851	0.000755311	0.000568656	0.000702588	0	0	0.0019645	0	0.000585046	0	0	0	0	0.00267905	0	0.00178962	0	0
Gm37745	0.000541862	0.000148478	0.000501429	0.000586772	0	0.000640802	0	0	0	0	0	0.00124756	0	0	0	0	0
Gm28209	0.000352956	0	0.000503858	0.000526326	0	0	0	0	0	0	0	0	0	0	0	0	0
Tmem177	0.0706652	0.0522582	0.0508411	0.0535904	0.0688492	0.0560451	0.0380432	0.0507866	0	0.0421695	0	0.0349904	0.0348519	0	0.0521061	0.0468388	0
Cfap221	0.00028913	0	0.00229192	0	0	0	0.000506795	0	0	0	0	0	0	0	0	0	0
Tmem37	0.133911	0.140611	0.119239	0.164223	0.101656	0.150561	0.143496	0.136225	0	0.0624274	0	0.129111	0.0201005	0	0.129561	0.142777	0.0340699
Dbi	1.81998	1.80257	1.9495	1.8631	1.81834	1.92077	1.6082	1.59096	0.88154	1.81904	0.775079	1.60643	1.32834	0.871138	1.67353	1.16707	1.30762
3110009E18Rik	0.0840719	0.0725485	0.0544833	0.0610252	0.0602944	0.0625922	0.06194	0.0729401	0.0799618	0.107517	0.0587426	0.0910357	0.0519235	0.0794164	0.0674606	0.0780344	0.136759
Steap3	0.151555	0.134386	0.128609	0.11932	0.139773	0.155841	0.0447442	0.0884231	0.040072	0.172016	0.0512705	0.0876978	0.0509626	0.0328392	0.123906	0.391803	0.121291
Insig2	0.324498	0.372132	0.32806	0.387615	0.294863	0.299184	0.433598	0.385145	0.36686	0.306128	0.243863	0.384571	0.325838	0.437082	0.352341	0.365848	0.35072
Gm37174	0.00345103	0.00534553	0.00387102	0.00379036	0.00495338	0.000704431	0.0101916	0.00150986	0	0.0093621	0	0.00107777	0.0245958	0.00965611	0.00427987	0.00423004	0
Ccdc93	0.261629	0.287285	0.267789	0.31202	0.270939	0.274727	0.281909	0.234361	0.113206	0.245061	0.225713	0.269273	0.241377	0.170005	0.226464	0.171205	0.329931
Gm15392	0.000484529	0.0003408	0.0010931	0.000715308	0.00138924	0	0	0.000298488	0	0	0	0	0.00139145	0	0	0	0
Gm15393	0	0	0.000320565	0.00080458	0	0	0	0	0	0	0	0	0	0	0	0	0
Htr5b	0.000138261	0.000889324	0.000736104	0.000383418	0	0.000533531	0.0019693	0.000278093	0	0	0	0.00367676	0	0	0	0	0
Ddx18	0.75193	0.680462	0.822451	0.754734	0.687347	0.782736	0.445379	0.607067	0.0338169	0.464233	0.0307576	0.50883	0.230478	0.0694988	0.653233	0.743696	0.50287
Gm8392	0.00110494	0.00171878	0.00152224	0.000918325	0.00641304	0.000813814	0	0.000686579	0	0.00318309	0.0253889	0.00170058	0.0018248	0.0120964	0	0	0
Dpp10	0.000298384	0.000509869	0	0	0	0.000447303	0	0	0	0.00183036	0	0	0	0	0	0	0
Gm25578	0	0.00021501	0	0	0	0	0	0	0	0	0	0	0.000657314	0	0	0	0.0295213
Actr3	2.37402	2.40222	2.31279	2.50199	2.29176	2.36013	3.06534	2.70997	3.56813	2.61434	3.20744	2.55422	2.81447	3.26389	2.29402	2.14627	2.80447
Slc35f5	0.206325	0.250902	0.253767	0.227315	0.202405	0.227276	0.195278	0.165917	0.172253	0.232807	0.360088	0.285419	0.0682665	0.174865	0.233776	0.132331	0.043109
Mgat5	0.705481	0.485471	0.522904	0.706522	0.546331	0.724663	0.418339	0.484689	0.334804	0.285663	0.297194	0.337091	0.341314	0.295312	0.50463	0.522333	0.271444
Gm37772	0.00287775	0.00136301	0.00041489	0.00381826	0.00423811	0	0.00134455	0.00344995	0	0	0	0.00141386	0	0	0.00400013	0	0
Gm37510	0.00657158	0.00785984	0.0106355	0.0097435	0.0422586	0.0103126	0.0161061	0.00752593	0	0.00298988	0	0.00395126	0	0.0171513	0.0113491	0.00959024	0
Gm8451	0.0332466	0.0343391	0.0381818	0.0398441	0.0328559	0.0275472	0.0203894	0.0269527	0.0364091	0.0484948	0.024517	0.0356541	0.036795	0.0395324	0.0462977	0.130796	0
Gm23370	0.00425282	0.0020713	0.00197955	0.00213193	0.0109346	0.00191942	0	0.00384461	0	0	0	0	0	0	0.00117216	0	0
Gm23734	0.000116643	0	0	0.000317451	0	0.000810012	0	0	0	0	0	0	0	0	0	0	0
Gm38301	0.000291738	0.000378305	0	0.000278946	0	0	0	0	0	0	0	0.00098507	0	0	0	0	0
Tmem163	0.00129357	0.000729588	0.00120965	0.00153484	0.00407682	0.000996639	0.000728411	0	0	0	0	0	0	0	0	0.0922141	0
Acmsd	0.000461273	0	0	0.000865461	0.00353409	0.000267728	0	0	0	0	0	0	0	0	0	0.00504587	0
2900009J06Rik	0.000859127	0	0.000249078	0.00231925	0	0.000502343	0	0	0	0.0017876	0	0	0.00151475	0	0.00186225	0.00207255	0
Ccnt2	0.310933	0.337356	0.336539	0.354886	0.447302	0.307096	0.362168	0.32004	0.390057	0.379885	0.503179	0.352218	0.433433	0.488236	0.319159	0.582952	0.531169
Map3k19	0.000106331	0	0	0	0.00126408	0	0	0	0	0.000746884	0	0	0	0	0	0	0
Rab3gap1	0.564451	0.528073	0.510797	0.542364	0.500924	0.47575	0.535429	0.545359	0.44436	0.45147	0.162061	0.486244	0.468906	0.55881	0.505804	0.55327	0.525436
Zranb3	0.102691	0.0530846	0.0407513	0.0641308	0.0861808	0.137623	0.039841	0.0863782	0.00436031	0.03639	0.013175	0.0318295	0.0490621	0.0181437	0.107826	0.0687493	0.0529818
Gm28800	0.00201377	0.000809229	0.000788746	0.00145729	0.00557626	0.00193482	0.000986768	0.00143469	0	0.000896039	0	0	0.00114942	0	0.000920322	0.00405242	0
Gm38248	0.0234005	0.0130794	0.0105286	0.0208459	0.0247196	0.0405891	0.0104226	0.0222482	0	0.00558497	0	0.0159364	0.0259781	0	0.017701	0.00639912	0
Rpl28-ps1	1.12517	1.17281	1.17374	1.16707	1.15048	1.15277	0.95087	1.02314	0.326257	1.06781	0.417724	1.12031	0.880847	0.623581	1.0993	1.35577	0.802864
Gm37625	0.000324988	0	0	0.00135559	0	0.000507133	0.000837063	0	0	0	0	0	0	0	0	0	0
Gm38026	0.000809262	0.000632695	0	0.00040269	0	0.000276081	0	0	0	0	0	0	0	0	0.00148825	0	0
R3hdm1	0.65403	0.589621	0.632419	0.584977	0.62162	0.633329	0.465565	0.601325	0.114534	0.507968	0.0889443	0.537319	0.419662	0.350546	0.584298	0.590667	0.383012
Gm37588	0.000481292	0.000577327	0	0.00123237	0	0	0	0	0	0.00289659	0	0	0	0	0	0	0
Gm37868	0.0011534	0.00056189	0.00067327	0.000914728	0.00331618	0	0.00320388	0	0	0.000272743	0	0.000698388	0.00161687	0	0	0	0
Gm37407	0.00897501	0.0101387	0.0156589	0.0121353	0.00942913	0.0113462	0.0077651	0.0103927	0	0.00772872	0	0.00640559	0.00308723	0	0.0169309	0	0
Ubxn4	1.14938	1.23638	1.21308	1.13965	1.0914	1.06341	1.21267	1.09275	1.56509	1.18268	1.83167	1.30963	1.10698	1.2533	1.17915	1.31782	1.1278
Lct	0.000340629	0.00246839	0.000861528	0.00277214	0.0108519	0.00175929	0.020439	0.000646268	0.177796	0.00126516	0	0.0146283	0.0816262	0.170521	0.00727318	0	0
Mcm6	1.37327	1.8346	1.46175	1.82183	1.57466	2.08615	1.43085	1.41424	0.0742739	1.13926	0.0992443	1.34608	1.09302	0.156662	1.59811	1.20331	0.0390352
Dars	0.973524	0.97147	0.852612	0.966633	0.782564	0.911518	0.929732	1.03828	0.744256	0.60003	0.317947	0.939006	0.816299	0.650664	0.932273	0.576673	0.258808
Gm6170	0.0513361	0.0498976	0.0491639	0.0457232	0.0519542	0.046732	0.0432015	0.0435261	0.00704778	0.0697382	0.014688	0.0706248	0.0178611	0.0032024	0.0514164	0.0584543	0.0484116
Cxcr4	1.48827	1.62128	1.24447	1.67794	1.34656	1.35439	2.17552	1.9144	2.84948	1.42366	2.98109	1.66601	1.80199	2.19673	1.58808	1.34434	2.19085
Gm29599	0.000127705	0	0.000277445	0.000467141	0	0	0	0	0	0	0	0.00155594	0	0	0	0	0
Gm26686	0.00644042	0.0236981	0.00665394	0.0115569	0.00264431	0.00905532	0.00917334	0.00874889	0	0.00497299	0	0.0382095	0	0	0.00275991	0	0
Thsd7b	0.000226709	0.000328673	0	0	0	0	0	0	0	0.00320306	0	0	0	0	0	0.0356362	0
Gm15790	0.144007	0.116591	0.125364	0.118195	0.1007	0.140392	0.099634	0.146965	0.00417031	0.10436	0.0413508	0.0793259	0.0646534	0.102125	0.142618	0.0563031	0.0911844
Rpl31-ps9	0.146353	0.13014	0.136269	0.144865	0.179616	0.161743	0.145747	0.117243	0.0663352	0.151621	0.0315337	0.142798	0.095585	0.0727963	0.130534	0.218174	0
Gm15674	0.000223193	0	0	0	0	0	0.000963943	0	0.0326613	0	0	0	0.00535093	0.034625	0	0.00295783	0
Gm15675	0.000594278	0.000256808	0	0.000669117	0	0.000591907	0.0218716	0.00219011	0.289413	0.0012111	0.0669183	0	0.0322055	0.161375	0	0.0416972	0
Cd55	0.0230564	0.0301336	0.0138572	0.0378294	0.0122816	0.00813482	0.145369	0.0688829	1.29005	0.00692834	0.215996	0.0639273	0.0588726	0.802557	0.0597597	0.42604	0
Gm16083	0.00021945	0	0.000333024	0.00123608	0	0	0	0	0.00464078	0	0.0130206	0	0	0.0145184	0	0	0
Gm37109	0	0	0	0.000540453	0	0	0	0.000432967	0.00971106	0	0	0.001165	0	0.00431947	0	0	0
Gm37283	0	0	0	0.00108061	0	0	0	0.0004428	0	0	0	0	0	0	0	0.00828396	0
Pfkfb2	0.0476151	0.0470188	0.0381676	0.0454794	0.0573161	0.0473064	0.041505	0.033871	0.0449097	0.04295	0.0532568	0.0635016	0.0133516	0.054191	0.0533745	0.0341331	0.0767484
Yod1	0.291756	0.30838	0.341146	0.35088	0.370372	0.237703	0.417278	0.342375	0.275438	0.245809	0.168443	0.309761	0.343223	0.299939	0.298931	0.385495	0.178554
Gm37163	0.00112744	0.000443293	0.00139045	0.000881454	0.0108363	0.000642015	0.00233579	0.00169964	0	0.000954563	0	0.00344901	0	0.00246836	0	0	0
AA986860	0.00284352	0.0041151	0.00429042	0.00115996	0.00682408	0.000286122	0.00591052	0.00315677	0	0.00501108	0	0.00427914	0.00150662	0.0111024	0.00214593	0.0552105	0
Gm28857	0.000416217	0.00266024	0.00106627	0.00103434	0.00104868	0.0015031	0	0	0	0.00141502	0	0.006175	0	0.00145673	0.00116977	0.0231295	0
Pigr	0.000596234	0.0011365	0	0.000763455	0	0.00145314	0.00112039	0.00192783	0	0	0	0	0	0	0	0	0
Il19	0.000320373	0	0.000395555	0.000404079	0	0	0.000520344	0	0	0.00049341	0	0	0	0	0.00216365	0	0
Il10	0.00011349	0	0	0	0.0018032	0.00120709	0	0	0	0.00310667	0	0	0	0	0	0	0
Mapkapk2	1.6563	1.53865	1.54198	1.49102	1.56934	1.56798	1.41849	1.58315	1.00047	1.41897	0.949622	1.7285	0.886494	0.921892	1.95917	0.799436	1.32218
Gm37084	0.0330869	0.0367741	0.0347042	0.0393459	0.0851422	0.0363652	0.0363104	0.0372477	0.0448926	0.0335115	0.130685	0.0280895	0.0580269	0.0352693	0.018297	0.0297507	0.0497646
Gm25717	0	0	0	0	0	0	0.000600534	0	0	0.00505806	0	0	0	0	0	0.013696	0
Dyrk3	0.0779762	0.065248	0.0932277	0.0668135	0.0682709	0.0748025	0.0333126	0.0409463	0	0.117923	0	0.065284	0.0166907	0.00397811	0.114578	0.214588	0.0578614
Eif2d	0.207883	0.208139	0.206191	0.212796	0.255862	0.241196	0.196921	0.231718	0.148855	0.20008	0.0546042	0.212615	0.179126	0.249545	0.226434	0.298537	0.0867962
Rassf5	0.213566	0.290177	0.210246	0.284409	0.278517	0.211514	0.647442	0.288256	1.88453	0.603399	2.02339	0.512045	0.700749	1.40167	0.302051	0.894669	1.39697
Ikbke	0.168729	0.374337	0.226185	0.311732	0.342926	0.200312	0.38083	0.242365	0.0378232	0.4194	0.0555617	0.694267	0.48964	0.348236	0.276627	0.284151	0.154149
Gm28913	0	0.000254706	0.00025187	0.000484316	0.00128508	0	0.000916208	0	0	0.000538777	0	0.00349173	0.00161049	0	0.000794847	0	0
Srgap2	0.453433	0.415795	0.321787	0.39656	0.595855	0.382495	0.426087	0.497929	0.457712	0.501925	0.305319	0.453418	0.55422	0.408681	0.472778	0.234234	0.813375
Gm38262	0.00201628	0.00220158	0.00151126	0.00108407	0	0.00217374	0.00164683	0.00230432	0	0.00069989	0	0	0	0	0	0.00209297	0
Gm37954	0.00844551	0.00837445	0.00513648	0.0048536	0.0222432	0.00849537	0.00459355	0.00882793	0.00332667	0.00455847	0	0.0181942	0.0131164	0	0.00291769	0.00691854	0
Gm29488	0.00541575	0.00562624	0.00519362	0.00529148	0.00656082	0.00852603	0.0083783	0.00399364	0.00779837	0.0109496	0	0.0100307	0.00733424	0.0149961	0.00422936	0.00523748	0
Gm29487	0.000156797	0	0.000239606	0	0	0	0	0.000482991	0	0	0	0	0	0	0	0	0
Gm24273	0	0.000213885	0.000475868	0	0	0	0.00100865	0	0	0.000444424	0	0	0	0	0.00201893	0	0
Fam72a	0.118816	0.0264044	0.0450408	0.0353157	0.0646838	0.0690603	0.0195522	0.116882	0.00706878	0.0784433	0	0.0147652	0.123314	0	0.121362	0.045787	0
Gm8532	0.000981715	0.00107642	0.00197361	0.00163521	0	0.00100196	0	0	0	0.00449642	0	0.00184784	0.00317548	0	0.00202357	0	0
Ctse	0.33448	0.419254	0.396296	0.397016	0.491566	0.348399	0.870648	0.329483	2.63329	0.8786	2.09164	0.394286	1.21673	2.10302	0.284285	1.85256	1.05836
Rab7b	0.111118	0.0964788	0.0964549	0.0599079	0.151046	0.134177	0.00989131	0.0261951	0.0299879	0.225092	0.0416545	0.113161	0.060023	0.0459397	0.0842178	0.125777	0.0537363
Slc26a9	0.00034945	0.000991315	0	0.00132162	0	0	0	0	0	0.000876952	0	0.00395883	0	0	0	0	0
Pm20d1	0.00261545	0.000949327	0.00175751	0.00273874	0.00233533	0.00331572	0	0.000509118	0	0.00105688	0	0	0.0034194	0	0.00117606	0.0142928	0
Slc41a1	0.117477	0.134458	0.14147	0.131452	0.208469	0.12273	0.0726244	0.0864609	0	0.130891	0.0665144	0.0995803	0.0397894	0	0.106635	0.170919	0.335763
Rab29	0.191076	0.175289	0.140075	0.173479	0.26054	0.181688	0.197851	0.194198	0.227635	0.305791	0.154048	0.218256	0.29459	0.328708	0.178832	0.126335	0.818063
Nucks1	1.7256	1.0613	1.41819	1.18382	1.4707	1.36167	0.764157	1.6883	0.154818	1.21305	0.19931	0.754142	1.4711	0.256288	1.68822	1.42267	0.494784
Gm38067	0.00623188	0.00469757	0.00228337	0.00413218	0.0164049	0.00699947	0.00405901	0.0110111	0.011623	0.0034358	0	0.00320917	0.00255996	0	0.00908764	0.00383131	0
Slc45a3	0	0.00270796	0	0.000481002	0	0	0	0	0.0126613	0.00229836	0.00948096	0	0.00154382	0	0	0.201265	0
Elk4	0.347846	0.389669	0.404445	0.395083	0.435572	0.332942	0.407866	0.388884	0.393326	0.383659	0.378257	0.422211	0.273762	0.308292	0.344803	0.604568	0.396234
Mfsd4a	0.0395749	0.0427571	0.0404889	0.0390662	0.0428167	0.0357001	0.0529434	0.0433887	0.00755289	0.0296429	0.0434027	0.0500944	0.0350618	0.00377024	0.0284689	0.0803115	0.212195
Gm37120	0.00245996	0.00414256	0.00980406	0.00623659	0.00395934	0.00249282	0.00957631	0.00225418	0	0.00236274	0	0.0265387	0	0	0.00737463	0	0
Cdk18	0.114828	0.201228	0.141585	0.164955	0.139037	0.151766	0.226165	0.162839	0	0.089472	0.00786312	0.432966	0.00731633	0	0.276643	0.0462872	0
Gm7241	0.000571032	0.00221793	0.000287735	0.000819751	0	0.000841455	0.00118838	0.000361294	0.0107017	0.0015037	0.0148839	0	0.0015601	0	0.00096618	0.00367044	0
Nuak2	0.221601	0.237132	0.279125	0.234309	0.200377	0.220826	0.178921	0.191756	0.610256	0.259438	0.817426	0.195069	0.208327	0.255372	0.191878	0.19313	0.867916
F730311O21Rik	0	0	0	0	0	0	0	0	0.0579022	0	0	0	0.00200668	0	0	0	0
Tmcc2	0.00022104	0.0010787	0.000812465	0.000881471	0.0102486	0	0	0	0.0156956	0.0313007	0	0	0.00625806	0	0	0.781675	0.0413047
Dstyk	0.057819	0.0669713	0.0610389	0.0553307	0.0638408	0.0556661	0.0992267	0.0559132	0.221259	0.0666711	0.193138	0.0610465	0.167229	0.231951	0.0552065	0.107722	0.223196
6030442K20Rik	0.00556995	0.00400864	0.00293154	0.00476564	0	0.00595925	0.00262954	0.00345416	0	0.000508488	0	0.00550461	0.00331421	0	0	0.0127175	0
Rbbp5	0.352236	0.293347	0.319514	0.312586	0.38175	0.327452	0.267956	0.377861	0.324323	0.340874	0.268827	0.323307	0.471131	0.329928	0.37386	0.384733	0.366559
Tmem81	0.0410234	0.0292649	0.0377304	0.0288003	0.034979	0.0319006	0.0254084	0.0369476	0.0474522	0.0319545	0.0375507	0.0167878	0.0742136	0.0719536	0.0350543	0.0692636	0.174926
Mdm4	0.659966	0.618776	0.554399	0.601028	0.649167	0.548955	0.708844	0.677199	1.19947	0.541855	1.20119	0.645712	0.834132	0.904451	0.63509	0.884872	0.708598
Gm29257	0.0201763	0.0258252	0.02047	0.0313106	0.0201138	0.0204055	0.0262881	0.0217419	0.0931944	0.0188266	0.0378325	0.0255311	0.0401912	0.0575303	0.0212273	0.0616805	0
Pik3c2b	0.0789588	0.127268	0.0808327	0.211555	0.0724645	0.074021	0.586273	0.244656	0.699071	0.0250168	0.239601	0.203349	0.185553	0.403165	0.0633956	0.0542707	0
Gm26616	0.0103318	0.0197847	0.0132705	0.0130101	0.0289437	0.0110077	0.0439435	0.0107803	0.0520839	0.01794	0.0346378	0.0340519	0.0323814	0.0831637	0.00769053	0.019173	0
Ppp1r15b	0.977564	1.08275	1.06233	1.14606	1.02511	0.984118	1.42218	1.20138	1.74785	1.03323	1.3414	1.20269	1.22202	1.63869	1.03902	0.911017	1.02449
Plekha6	0.079462	0.0917623	0.0479869	0.0931453	0.0422438	0.0483221	0.0773595	0.0908434	0.0517067	0.0160874	0.109255	0.0886695	0.109747	0.0924445	0.0896756	0.0515194	0.0382268
Etnk2	0.000366076	0.00111732	0.000217994	0.000202898	0.0215119	0.00047129	0.000588807	0	0	0	0	0.00173305	0	0	0.000922024	0	0
Sox13	0.298954	0.373492	0.282097	0.460052	0.282266	0.280349	0.816364	0.556739	1.32652	0.160234	1.06474	0.436187	1.04566	1.58872	0.25954	0.203973	0.0825622
Snrpe	1.3674	1.20846	1.24193	1.22632	1.18472	1.29464	0.9974	1.36032	0.438533	1.15216	0.355782	1.09651	1.22664	0.739579	1.36476	1.32119	1.03179
Gm26706	0.000867592	0.000551124	0.00104449	0	0	0.00140277	0	0.00168946	0.00327733	0.000698955	0	0	0.00123086	0	0	0	0
Zc3h11a	0.0315283	0.0365674	0.0368783	0.0281719	0.051068	0.0278031	0.0462945	0.0342039	0	0.0302747	0	0.0200792	0.00995125	0.0727131	0.0184516	0.106727	0
Gm38394	0.0141432	0.0118771	0.0188028	0.0120187	0.0410694	0.0128718	0.00952678	0.00725473	0	0.0218525	0.0106138	0.0119538	0	0.0217981	0.0113207	0.0041108	0
Lax1	0.000689574	0.00228363	0.00162102	0.00428328	0.0130077	0.00122529	0.00433492	0.00410292	0.00711397	0	0.0392677	0	0.0123866	0.0157445	0.00438645	0.447255	0
Atp2b4	0.347161	0.325536	0.271249	0.32746	0.378147	0.20419	0.199995	0.370885	0.0273525	0.186082	0.0716814	0.369638	0.149711	0.063945	0.397218	1.04489	0.161199
Gm37368	0.00321919	0.00279871	0.00258993	0.00332262	0.0178749	0.00237062	0.000467393	0.00299707	0	0.00530545	0	0	0.000650504	0	0.00506134	0.00351763	0
Btg2	0.305249	0.35818	0.315094	0.286686	0.483928	0.247904	0.680405	0.376487	2.61991	0.960169	3.17133	0.540494	0.744704	1.56582	0.319009	1.51194	2.09334
Gm38140	0.00164707	0.0034172	0.00306591	0.0038359	0	0.000275688	0.00374225	0.00150065	0	0.0023373	0.0259647	0.000790459	0	0	0.00563377	0.00835067	0
Gm8618	0.00186778	0.00142739	0.00209031	0.0014123	0.00161709	0.00202075	0.000679269	0.00276825	0	0.00305883	0	0	0	0	0.00593932	0	0
Chit1	0.00450855	0.00264176	0.00313945	0.0113451	0.00758166	0.00388824	0.0169905	0.0231665	0.0227764	0.00522257	0.0154284	0.0110457	0.393284	0.063608	0.0115686	0.0182045	0
Chil1	0.661526	0.886066	0.681931	0.915786	1.00922	0.889439	1.89974	1.05948	3.58387	1.1895	3.06669	1.18879	2.76008	3.29969	0.605525	0.395532	0.564772
Adora1	0	0	0	0.000354556	0	0	0	0	0.0146112	0	0	0	0	0.00481398	0	0	0
Ppfia4	0.00289139	0.00563575	0.00706712	0.00460484	0.0543565	0.00261462	0	0.00126939	0.021517	0.350613	0.0535676	0.002492	0.0194832	0.0133163	0.00250764	0.15057	0.75187
Tmem183a	0.634778	0.625131	0.677373	0.579916	0.592169	0.636223	0.558725	0.603899	0.445487	0.621355	0.455998	0.671448	0.51633	0.539113	0.731	0.487117	0.522632
Cyb5r1	0.726664	0.823114	0.610405	0.733767	0.712125	0.728395	0.919344	0.841568	1.43131	0.75984	1.90098	0.972233	0.626861	1.111	0.914585	0.6069	1.26941
Adipor1	1.08116	1.16897	1.05977	1.1304	1.1763	1.0203	1.72501	1.36102	2.79038	1.1862	3.29718	1.504	1.43436	2.03513	1.21884	1.02588	1.74489
Platr1	0.00281242	0.00318578	0.00196143	0.00107511	0.000957831	0.0030762	0.00529112	0.00482744	0	0.000358804	0.0234864	0.00284761	0.0171574	0.00471122	0	0	0
Gm37935	0.00150642	0.00171643	0.00193058	0.00281266	0.0110998	0.00170699	0.00141037	0.00308546	0.00450348	0.00215864	0	0	0.00214649	0.0182844	0.00420978	0	0
Klhl12	0.14522	0.133673	0.130684	0.113014	0.210591	0.110981	0.221811	0.123537	0.564351	0.24131	0.58041	0.231199	0.172049	0.305509	0.159103	0.320618	0.412788
Rabif	0.222815	0.249856	0.236225	0.238775	0.261366	0.214429	0.353251	0.219668	0.746432	0.292764	0.913543	0.27521	0.325552	0.57801	0.200156	0.276296	0.338423
Gm25612	0.00195959	0.00127549	0.00197732	0.0037746	0	0.00113	0.00185917	0	0	0.00819893	0.0123516	0.00782921	0.00067926	0	0.00099457	0	0
Gm15454	0.00629723	0.00501332	0.00239799	0.00640791	0.00295699	0.00538152	0.00523301	0.00381742	0.0764067	0.00578753	0.0128429	0.00537182	0.0209035	0.105028	0.00386347	0.0150932	0.0356553
Gm29376	0	0.000409399	0	0	0	0	0	0.000345038	0.0156326	0	0	0	0.0232712	0.00744744	0	0	0
Kdm5b	0.158689	0.245823	0.2867	0.225715	0.192577	0.116046	0.418981	0.102847	1.1932	0.220344	1.30443	0.358287	0.21115	0.815781	0.101649	0.624966	0.248311
Syt2	0.000110187	0	0.000699893	0.000279174	0	0	0	0.00107465	0	0	0	0	0	0	0	0.00337099	0
Ppp1r12b	0.128226	0.108576	0.0928683	0.119839	0.105375	0.0910254	0.179	0.136045	0.0442495	0.0845056	0.0126508	0.131012	0.0582436	0.122901	0.125499	0.0393152	0
Gm37949	0.00023697	0.000321248	0.000629601	0.000430974	0	0	0.000736705	0	0	0	0	0	0	0	0	0	0
Gm37677	0.0111729	0.0119034	0.0121747	0.0152874	0.034947	0.0140278	0.0213092	0.0120487	0.0128603	0.00569355	0	0.0157853	0.0173587	0.0153448	0.0176255	0.00801005	0
Ube2t	0.227296	0.0981306	0.10234	0.123778	0.160529	0.179269	0.0569445	0.228223	0.00644537	0.111065	0.0101057	0.0264274	0.205355	0.00366808	0.239833	0.141226	0.102922
Lgr6	0.120937	0.125175	0.0812832	0.141205	0.137867	0.122365	0.137483	0.144678	0	0.0630718	0	0.129862	0.00299117	0	0.0950259	0	0
Ptprv	0.0396176	0.0436277	0.0279095	0.0524011	0.0427928	0.0366642	0.0807899	0.0657289	0.158845	0.0436907	0.0797571	0.0394748	0.204668	0.224147	0.0393991	0.143262	0.0344627
Gm10535	0.00040783	0.000358899	0	0	0	0	0.000660504	0	0	0.000608945	0	0.000873275	0	0	0	0	0
Ptpn7	1.17174	1.16381	1.23565	1.31553	1.14936	1.21846	1.14203	1.31503	0.691013	0.781013	0.54902	0.868112	1.3763	0.983114	1.10034	1.30325	0.337462
Arl8a	0.308912	0.393817	0.368137	0.318246	0.388178	0.270228	0.439801	0.364895	1.12886	0.625638	1.01125	0.520618	0.574169	0.970645	0.394182	0.471023	0.869815
Gm26280	0.000473269	0.000820132	0	0.00114393	0	0.000296713	0	0.000410996	0	0.000694514	0	0.000815133	0	0	0.00247061	0	0
Gm15445	0.00982829	0.0173022	0.016522	0.0101376	0	0.0100947	0.0163741	0.012772	0.0516474	0.0457707	0.0413935	0.0201478	0.00857787	0.088488	0.0153326	0.0496604	0.0712604
Gm4204	1.57396	1.51829	1.44446	1.54217	1.54934	1.7777	1.25703	1.58608	0.552873	1.51406	0.663175	1.28372	1.53496	0.705522	1.61421	1.88547	1.3996
Gm26642	0.0006493	0.00126833	0.000825918	0	0.0016039	0.00138255	0	0.000486178	0	0.00459513	0.0119595	0	0	0	0.00179844	0	0
Elf3	0.000534049	0.000154865	0.000611123	0	0	0	0	0	0	0.00192432	0	0	0	0	0	0	0
Rnpep	0.292693	0.371264	0.402981	0.261003	0.399389	0.36835	0.102839	0.125648	0.623255	0.546751	0.637689	0.276192	0.378563	0.632349	0.279669	0.206901	0.478862
Timm17a	0.370104	0.355693	0.410546	0.358401	0.301312	0.387443	0.237368	0.31626	0.0561397	0.341404	0	0.29243	0.162206	0.0691458	0.367775	0.328343	0.0792749
Shisa4	0.00211325	0.0017292	0.00159076	0.000976893	0	0.00110264	0.0020865	0.00229078	0	0.00713274	0	0.00311938	0	0	0.00931211	0.00607956	0
Ipo9	0.384701	0.331061	0.353249	0.356638	0.475375	0.438888	0.267297	0.353767	0.137691	0.409564	0.165995	0.217155	0.320337	0.0828428	0.380579	0.434487	0.165904
Gm28277	0.000168522	0.000281864	0	0.000720059	0	0.00128424	0	0.000323032	0	0.000365097	0	0.00125303	0	0	0	0	0
Nav1	0.207404	0.259887	0.18678	0.247945	0.258454	0.249264	0.33416	0.200201	0.0271856	0.573662	0.0205527	0.361772	0.0611308	0.0306557	0.206776	0.187907	1.0151
2610012C04Rik	0	0	0	0	0.00253078	0	0	0.000420742	0	0	0	0	0	0	0	0	0
Gm37333	0.00314548	0.00654059	0.00337363	0.00488628	0.0258861	0.00421974	0.000783069	0.00238063	0	0.0114284	0	0.0136974	0.0032727	0	0.00393175	0	0.0537363
Gm4793	0	0	0.00129678	0.000395653	0	0	0	0	0	0.000895627	0	0	0	0	0	0	0
Gm38399	0.00258774	0.000492848	0.0014064	0.0019534	0.00233412	0.00336755	0.00051888	0.00072041	0.00643965	0.00468795	0	0	0	0	0.000771263	0	0
Csrp1	0.22794	0.189795	0.16493	0.201455	0.243788	0.266075	0.148323	0.318115	0.0122977	0.196431	0.0165547	0.163818	0.137423	0.0143475	0.282444	0.246471	0.033253
Phlda3	0.00905861	0.010686	0.00859141	0.00391744	0.00813255	0.0113447	0.00715928	0.0115216	0	0.00948378	0	0.0123621	0	0	0.0135937	0.0263941	0
Tnni1	0	0	0	0	0	0	0	0	0	0	0.0120707	0	0	0	0	0.0137376	0
Gm28883	0.0249576	0.0328985	0.0242977	0.0462933	0.014896	0.0368018	0.0289677	0.0323514	0.0968527	0.0153239	0.0106042	0.0229927	0.0708094	0.0166128	0.0209686	0.0383433	0
Tmem9	0.00832967	0.00318319	0.0132259	0.00189929	0.0458939	0.0157574	0	0.00119482	0	0.0340383	0.0180091	0	0.0112014	0.0149961	0.000687428	0.370211	0
Gm15850	0.00228936	0.00260893	0.00198279	0.00482149	0	0.000394672	0.016831	0.00266481	0.00714982	0.00230666	0.0566937	0.00359084	0	0	0.0030952	0	0
Kif21b	0.176277	0.196709	0.136821	0.18384	0.206929	0.10459	0.537841	0.281012	1.73287	0.251173	1.5923	0.280164	0.929799	1.42347	0.156351	0.990866	1.12681
Gm26781	0.00041405	0	0	0.000429921	0	0.000503465	0	0	0	0	0	0.00125626	0	0	0.00132679	0	0
Camsap2	0.109148	0.12567	0.115125	0.093068	0.162086	0.133381	0.0923747	0.0777189	0.0527712	0.262256	0.0908896	0.166194	0.0431645	0.0545195	0.146601	0.238632	0.316468
9230116N13Rik	0.0190801	0.0214168	0.0204188	0.0182679	0.0564155	0.0192295	0.0107197	0.0120331	0	0.0350295	0	0.0167267	0.0191673	0	0.0197973	0.0571297	0
Ddx59	0.0646936	0.0493416	0.0457978	0.0370305	0.0714209	0.0529542	0.0271295	0.0449947	0	0.0711718	0	0.0633445	0.039379	0.0222519	0.0797162	0.047529	0.17789
Kif14	0.406257	0.0287506	0.0753371	0.0707671	0.286858	0.163097	0.0303609	0.505783	0.0329358	0.178963	0.0559586	0.00829488	0.490606	0.0228036	0.460812	0.292993	0
Gm29486	0.00312154	0	0	0.000295566	0.00317484	0.00178852	0	0.0019506	0	0	0	0	0.0165636	0	0.00296962	0	0
Platr23	0.000151772	0.000286661	0.0002901	0	0	0	0	0	0	0	0	0	0	0	0	0	0
Zfp281	0.333469	0.392335	0.363224	0.420055	0.349843	0.253319	0.79292	0.423363	0.931879	0.283191	1.19948	0.47952	0.521021	0.755873	0.354966	0.399183	0.41483
Gm19705	0.00518932	0.00935058	0.0112132	0.0312406	0.016431	0.00766773	0.295949	0.0664682	0.816215	0.0136574	0.475555	0.0430722	0.374881	0.739782	0.00185226	0.0997715	0.0971226
Platr22	0.000219205	0.00143256	0	0.000673096	0	0	0.00343072	0.00294931	0	0.00241782	0	0.00128812	0	0.0101422	0.0011325	0	0
Gm8762	0.00182196	0.000713837	0.00194568	0.00232199	0.00496047	0.00158187	0.0018033	0.00319197	0	0.000410432	0	0.00156307	0	0	0.00206542	0	0
Gm29718	0.00310537	0.00154546	0.00111691	0.00193902	0	0.00494432	0.00306892	0.00413616	0	0.00375449	0	0.00179566	0.00215567	0	0.00431716	0.0255501	0
Gm37903	0	0.000169985	0.000738434	0	0	0	0	0	0	0	0	0	0	0	0	0	0
Gm22727	0.00105537	0	0.000304241	0	0	0.000508173	0	0	0	0.000776148	0	0.00228362	0	0	0	0	0
Gm4258	0.0608085	0.0826248	0.0801376	0.0739677	0.08173	0.0475253	0.0533517	0.0474945	0.00469452	0.0234377	0	0.0525032	0.00374771	0	0.0527131	0.0732395	0.0699306
Gm37298	0.0245291	0.0339405	0.0322891	0.0479057	0.0302761	0.0289206	0.0282819	0.0232037	0	0.0129965	0	0.0180849	0.00140134	0	0.0194407	0.00646569	0
Gm26979	0.00136495	0.000819703	0.000903953	0	0	0.000812716	0.00234141	0.00098476	0	0	0	0.00265126	0	0	0	0	0
Gm37124	0.0295266	0.0419572	0.0286719	0.0364721	0.0484565	0.0340496	0.019504	0.0321313	0	0.0150611	0	0.0249473	0.0106878	0	0.0224898	0.00909627	0.110558
A130050O07Rik	0.0250501	0.0348254	0.0362504	0.0334312	0.0702313	0.0226653	0.014894	0.0179706	0	0.0162412	0	0.028471	0.0182895	0	0.0289023	0.0043985	0
Gm26936	0.00113616	0.000689913	0.00130238	0.00123474	0.00139778	0.00143469	0	0.000981485	0	0.00111566	0	0	0	0	0.00173128	0.00327871	0
Gm26930	0.0156931	0.0266069	0.0181343	0.0200988	0.0181474	0.0186336	0.004935	0.0143101	0	0.0104734	0	0.0117915	0.00790964	0.00475156	0.0098517	0.00201691	0
D130019J16Rik	0.0620955	0.0873804	0.0686383	0.0684424	0.0985298	0.0559395	0.0441563	0.0540031	0	0.031941	0	0.0568859	0.00903959	0	0.076937	0.0431951	0
Gm37534	0.0206071	0.0299679	0.0240734	0.0238258	0.0397553	0.0218532	0.012905	0.0134505	0	0.00968674	0	0.0208003	0	0	0.0254712	0.00601793	0
Mir181a-1	0.000539499	0	0	0.000383387	0	0	0	0	0	0	0	0	0	0	0	0	0
A430106G13Rik	0.0322921	0.0595768	0.0417257	0.0367797	0.0928582	0.0336423	0.0254102	0.0280485	0	0.0299625	0	0.0330826	0.00708051	0	0.0319818	0.00832152	0
Gm37632	0.00196783	0.000517028	0.000616143	0	0	0.000683804	0.0044076	0.000609659	0	0	0	0	0	0	0.00239054	0	0
Ptprc	1.21153	1.51751	1.2155	1.29196	1.35531	1.17691	2.23993	1.49305	3.51995	2.01925	3.93249	2.11113	1.75737	2.68253	1.64287	2.13228	3.16182
A130071D04Rik	0.0219993	0.0282112	0.0233569	0.0306136	0.0814184	0.022044	0.0548377	0.023572	0.193996	0.050267	0.214508	0.0386872	0.039445	0.14508	0.0198974	0.0433251	0.0340699
Gm28556	0.000157671	0	0	0.000430743	0	0	0.00203945	0.00119918	0	0.00163477	0	0	0.00343303	0	0.0027595	0	0
Nek7	0.879638	0.826734	0.771447	0.821318	0.775065	0.760867	1.00186	0.988906	0.934549	1.03383	0.799499	0.873881	0.714724	0.862977	0.875061	0.974181	1.17107
Gm37080	0.000381814	0.000475677	0.00117332	0.00132658	0	0.00130448	0.00424343	0.00164532	0	0	0	0.001303	0	0.00666185	0.00353227	0	0
Gm37101	0.0042139	0.00555636	0.00212587	0.00299622	0.0175634	0.00179882	0.00103058	0.00302428	0.00745877	0.000484779	0	0.00619044	0.0010869	0.0139676	0.00133673	0.00264106	0
Gm5833	0.0205448	0.0328483	0.0455581	0.0329909	0.0704696	0.0669076	0.0154596	0.0170766	0	0.0143353	0	0.0193759	0.00313273	0	0.00554243	0	0.0537363
Lhx9	0	0	0.000661069	0.000586088	0	0	0	0.00248484	0	0	0	0	0	0	0	0	0
2310009B15Rik	0.111812	0.0934233	0.139698	0.126593	0.150155	0.105796	0.108131	0.106579	0.0453676	0.13432	0.0351217	0.0742023	0.150098	0.17655	0.0900652	0.103519	0.10098
Gm37045	0.000663511	0.00084997	0.00122532	0.00133713	0.00339274	0.000922796	0.00479281	0.00113624	0	0.00477607	0	0.00591196	0.00635341	0.011131	0	0	0
Dennd1b	0.250047	0.232775	0.238441	0.307893	0.256783	0.239563	0.435249	0.327736	0.852852	0.359245	0.713607	0.23433	0.558613	0.701222	0.190624	0.427401	0.416296
Gm37423	0.00502646	0.0043611	0.00374706	0.00846052	0.00941864	0.00617109	0.00523449	0.00679169	0.00603011	0.00422983	0	0.00301705	0.00864837	0.0456359	0.00326281	0	0
4930596I21Rik	0.000635591	0	0	0.000300647	0	0	0	0	0	0	0.0127891	0	0	0	0	0	0
Gm16305	0	0.000331042	0.000262483	0	0.00122722	0	0.00137998	0	0	0	0	0.00186028	0	0	0	0	0
Gm37470	0.00206347	0.00204872	0.00320124	0.00261639	0.00119451	0.00197815	0.000935967	0.00451836	0.00931011	0.00255729	0	0	0.00818052	0.00876525	0.0012565	0	0.0356553
Gm43544	0.00225717	0.000521495	0.00115583	0.000229451	0	0.00206959	0.00359588	0.000929544	0	0.00246151	0	0.0023011	0.00252154	0.00529005	0	0	0
Gm37655	0.000934214	0.00133599	0.000724124	0.000342566	0	0.000769108	0	0	0	0.000675934	0.013825	0	0	0	0	0	0
Gm37718	0.00478684	0.00593358	0.00996233	0.00645217	0.0121505	0.00645936	0.0101415	0.00694233	0.017467	0.00430937	0	0.000591736	0.021656	0.00521196	0.00190477	0.00696734	0
Zbtb41	0.168242	0.172337	0.178745	0.174602	0.196563	0.158735	0.221965	0.203464	0.0836447	0.110584	0.037298	0.144003	0.127846	0.0523777	0.168726	0.255851	0
Aspm	0.870073	0.0615974	0.259621	0.165328	0.566377	0.221812	0.0860368	0.973532	0.0631676	0.370677	0.0917488	0.0414672	0.761097	0.0144627	1.03163	0.568141	0
Cfhr1	0.000214117	0.00123428	0.000388399	0.00210287	0	0	0.00189969	0.00108116	0	0	0	0.00139503	0	0	0	0	0
Gm5837	0.144677	0.110608	0.166006	0.117403	0.113928	0.121449	0.0459221	0.110143	0	0.0673119	0.0123169	0.0791484	0.0662869	0.0073031	0.118983	0.216397	0
Cfh	0.000186407	0	0	0	0	0.000302564	0	0.000653118	0.00901671	0.208053	0.0158859	0	0	0	0	0.0109212	0.759741
Gm37371	0.00716451	0.00713901	0.0080963	0.00861942	0	0.00610195	0.0115177	0.00808465	0	0.0022729	0	0.0065351	0	0	0.00659652	0	0
Gm37599	0.0545509	0.0461508	0.0779219	0.0531013	0.0621429	0.0808667	0.033323	0.0487507	0.00509827	0.0339945	0	0.0376529	0.0198221	0.00655337	0.0470454	0.0498729	0
Gm5835	0.966857	1.01259	0.99882	0.96689	0.964711	0.97204	0.778092	0.837003	0.13214	0.862039	0.130542	0.967333	0.55943	0.341606	1.00744	1.1052	0.735873
Cdc73	0.693419	0.650983	0.698932	0.637802	0.664498	0.657554	0.619927	0.650137	0.694619	0.571898	0.663266	0.61321	0.513601	0.604642	0.686537	0.67731	0.386506
B3galt2	0.003823	0.00444472	0.00233141	0.00401564	0.00122122	0.00235418	0.00163965	0.00577838	0	0.0136705	0	0.00756661	0.00199676	0	0.00279981	0	0
Gm6397	0.00758082	0.00420603	0.0052108	0.00202841	0	0.0058557	0.00531508	0.00920743	0	0.00290563	0	0.00596329	0.0104022	0	0.00647606	0.00984771	0
Glrx2	0.542272	0.607907	0.547492	0.614617	0.495208	0.550802	0.536319	0.516376	0.319664	0.466793	0.309863	0.553944	0.420734	0.377239	0.509224	0.413303	0.599066
Trove2	0.197344	0.182178	0.179851	0.148996	0.166689	0.159254	0.14778	0.164429	0.0871975	0.14771	0.281753	0.191823	0.0389104	0.085532	0.244113	0.109554	0.13357
Uchl5	0.951021	0.812952	1.01154	0.895899	0.953026	1.03912	0.690384	0.899575	0.614357	0.700136	0.821809	0.573689	0.917868	0.640156	0.912545	0.796081	0.444754
Gm29170	0.0569195	0.0686778	0.0629506	0.0707509	0.0327703	0.0682252	0.0472959	0.0589511	0.036624	0.0326773	0.0702358	0.0711483	0.0441032	0.0834543	0.0596854	0.0657248	0
Rgs2	1.80986	2.28268	1.88237	1.77539	1.93099	1.84406	2.42237	1.82017	4.01734	2.49373	4.71438	2.81914	2.0235	2.90417	2.20198	2.52885	3.52492
Rbm6-ps2	0.000117944	0	0	0.000278946	0	0.000235333	0	0	0	0	0	0	0	0	0	0	0
Rgs1	0.00696964	0.0303987	0.0118286	0.00556935	0.0203786	0.00904915	0.0481045	0.00476817	0.0837715	0.207075	0.21479	0.220414	0.0202503	0.0380728	0.0757652	1.33126	1.50386
Gm7266	0.111224	0.11933	0.122444	0.115916	0.137447	0.116652	0.0869858	0.0990495	0.00923282	0.126168	0.0127791	0.127985	0.112171	0.0436069	0.105783	0.164666	0.110391
Rgs18	0.394779	0.460826	0.403314	0.363296	0.365716	0.377697	0.562672	0.44042	1.59149	0.524954	1.21018	0.562869	0.855017	1.24011	0.488774	0.761384	0.486188
Gm8856	0.000625255	0.00116729	0.000914332	0.00167174	0.0014991	0.000454263	0.00264235	0.000452725	0.00958711	0.00121098	0	0.00106148	0.00530549	0.00376616	0.00114884	0	0
Gm5262	0.00112486	0.000932538	0.00175703	0.00115717	0.00303768	0.00088856	0.00146189	0.00118307	0	0.00178643	0	0.00303387	0	0	0.000915647	0	0
Gm5263	0.00403307	0.000881054	0.00170338	0.00133041	0.00253269	0.00242127	0.00103658	0.00469915	0	0.00220899	0	0.00144186	0.00154535	0	0.00135782	0	0
Gm15583	0.00081347	0.00106711	0.000365881	0.00056385	0	0.000668998	0	0.000401709	0	0	0	0	0.00125636	0	0.00208141	0	0
A230059L01Rik	0.000978539	0.00126351	0.0010373	0.00143417	0.00359224	0.000331282	0.00171775	0	0	0	0	0.00362535	0	0	0.000754883	0	0
Gm5703	0.000266812	0	0.000305872	0	0	0	0	0	0	0	0	0	0	0	0	0	0
Gm15443	0.0124239	0.0116149	0.0106556	0.00833101	0.00117684	0.00807861	0.00982281	0.00776824	0.00940171	0.00434117	0.0426835	0.0164917	0.019088	0.0126061	0.0202858	0.00582806	0
Pla2g4a	0.345245	0.425354	0.3369	0.41367	0.36213	0.406844	0.452168	0.409748	0.469062	0.358872	0.217095	0.425568	0.44	0.41172	0.393032	0.337017	0.121495
n-R5s219	0.000232733	0.000440802	0	0.000438843	0.00160075	0	0.00203065	0	0	0	0	0	0	0.00658133	0.000630852	0	0
Ptgs2	0.0693925	0.151241	0.0946754	0.0416569	0.0537966	0.0856272	0.036416	0.0445423	0.384894	0.23002	1.70525	0.276718	0.0495212	0.0662007	0.210766	0.266761	0.0583743
Gm9687	0.010606	0.0094898	0.00934381	0.00805665	0.0089707	0.00670256	0.00290858	0.0121288	0	0.0106111	0.0166168	0.016422	0.0164489	0	0.00882306	0.0163591	0.0504516
Ptgs2os2	0.00176732	0.00402787	0.00118757	0.00164103	0	0.000785549	0.000495249	0.00129893	0.232179	0.00835412	0.433315	0.0208298	0.0116296	0.00207562	0.00728744	0.0189574	0
Rbm3-ps	0.181577	0.146946	0.157273	0.138717	0.183594	0.17328	0.124883	0.179193	0.13658	0.27737	0.109711	0.141343	0.375261	0.20046	0.147923	0.277731	0.166519
2310030A07Rik	0.000133615	0	0	0	0	0	0	0.000532026	0	0.000650141	0	0	0	0	0	0	0
BC003331	0.494013	0.48243	0.529889	0.478917	0.482076	0.499114	0.327336	0.39522	0.176012	0.461436	0.199446	0.490914	0.319373	0.302413	0.487439	0.452354	0.709754
Tpr	1.68613	1.70962	1.72193	1.70309	1.56448	1.65163	1.67592	1.75845	1.13564	1.58169	1.03681	1.71163	1.65966	1.45709	1.71511	1.81994	2.01652
Prg4	0.00555013	0.00614686	0.00842642	0.00711935	0.0227216	0.0159822	0.00784393	0.00977288	0.00562958	0.0201294	0	0.00476142	0.0107936	0.0183851	0.0110976	0.0837112	0
Ska2l-ps	0.0139137	0.00225792	0.00472572	0.00518839	0.00405836	0.00784059	0.00320245	0.0201387	0	0.00492402	0	0.00283496	0.0236153	0	0.0152959	0.00386745	0
Hmcn1	0.000222631	0	0.000244519	0.00141256	0	0	0	0.000448303	0	0.000667064	0	0	0	0	0	0	0
Gm10138	0.0501636	0.0830204	0.046259	0.0614618	0.0451761	0.0663802	0.0445066	0.0492118	0.0148876	0.036875	0.11401	0.0483649	0.0482515	0.0159568	0.0425563	0.0709548	0.0883422
Ivns1abp	1.24682	1.21113	1.176	1.10962	1.39817	1.3757	0.797191	1.05523	0.296527	1.16152	0.586541	1.01496	0.643762	0.187505	1.24075	1.32128	0.992961
Swt1	0.284697	0.254411	0.279031	0.262193	0.212741	0.246306	0.254376	0.291128	0.435133	0.25675	0.768487	0.266107	0.257966	0.330964	0.286108	0.517413	0.436416
Trmt1l	0.16379	0.167159	0.174719	0.178936	0.184379	0.142872	0.236982	0.20223	0.299491	0.140079	0.447087	0.148523	0.1703	0.297106	0.168649	0.230291	0.25377
Mir7682	0.000329486	0	0.000298915	0	0	0	0	0.000444837	0	0	0	0	0	0	0	0	0
Gm37893	0.013668	0.0129929	0.0132225	0.0126627	0.0223105	0.0122545	0.0160732	0.0185634	0.034715	0.00905859	0.0495348	0.00668094	0.0126788	0.0244139	0.0153612	0.0327682	0
Rnf2	0.328259	0.292197	0.354922	0.319445	0.281057	0.322997	0.29792	0.34174	0.335469	0.257363	0.390502	0.243268	0.344945	0.2541	0.272842	0.525261	0.523602
Gm36527	0.00314765	0.00328653	0.00248189	0.00302211	0.00448501	0.000925212	0.00630297	0.00414797	0.0152918	0.00134494	0	0.00141151	0	0.00757857	0	0	0
Gm19503	0.0136056	0.0154764	0.0157271	0.0115057	0.025941	0.00985546	0.00501636	0.0126446	0.0278189	0.0252015	0.0149635	0.0130554	0.017581	0.00983066	0.00725161	0.0539902	0
Fam129a	0.124093	0.260895	0.131496	0.24307	0.234597	0.13072	1.00839	0.456099	2.11543	0.836115	2.35624	0.530877	0.627579	1.40548	0.195865	0.942162	1.54058
2810414N06Rik	0.00498486	0.00825521	0.00506574	0.00531909	0.00799183	0.00289215	0.00682241	0.00362494	0	0.00568942	0	0.00222574	0.00501924	0	0.00376912	0	0
Edem3	0.231873	0.240613	0.275768	0.245173	0.174699	0.230434	0.220069	0.225307	0.0957474	0.258057	0.0636233	0.226239	0.185303	0.184622	0.189198	0.535053	0.247135
1700025G04Rik	0.276411	0.295877	0.256651	0.280451	0.362702	0.357246	0.250655	0.310707	0.0154114	0.416197	0.0249073	0.26024	0.239307	0.0513675	0.324897	0.527193	0.139811
Tsen15	0.128693	0.0810382	0.0959345	0.102823	0.106317	0.120747	0.078785	0.102977	0.00824316	0.0804431	0	0.0728256	0.106965	0.013629	0.106904	0.233869	0.0913272
Rgl1	0.00210698	0.00258726	0.00303346	0.00128447	0.00817899	0.00090422	0.00352037	0.000798177	0.00492943	0.0573461	0	0.00284455	0.00268309	0.00479449	0.00114322	0.182413	0.186143
Gm7278	0.00212925	0.00160713	0.000329111	0.00170682	0	0.00113046	0.000520344	0	0	0	0	0.000897296	0	0	0	0	0
Arpc5	2.01863	2.22831	2.02963	2.19989	1.95559	1.95464	3.09806	2.45349	4.01117	2.46684	3.70438	2.60914	2.68228	3.51838	2.12942	2.30205	2.74338
Ncf2	0.845166	1.08551	0.968965	1.01419	0.946619	0.8491	1.51469	1.02351	2.91616	1.31095	3.12916	1.34643	1.43559	2.31185	0.992063	0.787606	1.76939
Smg7	0.452752	0.430898	0.456193	0.459224	0.493555	0.424761	0.553229	0.504247	0.747263	0.494379	0.868297	0.496094	0.647144	0.69768	0.471241	0.652149	0.812574
Gm28791	0.00935848	0.0111379	0.0173747	0.0150061	0.0151412	0.0138638	0.0127294	0.0211933	0.00436031	0.0170053	0.0236474	0.00594855	0.0188867	0.0107738	0.0130587	0.0239375	0
Nmnat2	0.0011532	0.00109687	0.000905663	0	0	0.00134671	0.00333459	0.00170872	0.00723771	0.000989343	0	0.00427381	0	0.00486748	0.00122211	0.0175989	0
Gm28960	0.00014025	0.000210977	0	0	0	0	0.000513843	0	0	0	0	0	0	0	0.00109406	0.00398143	0
Lamc2	0	0	0.000387254	0.000528203	0	0	0	0	0	0	0	0.00130006	0	0	0.00123402	0	0
Lamc1	0.188233	0.189006	0.216238	0.17584	0.208725	0.246676	0.0883807	0.08981	0.00593061	0.259506	0.0156215	0.155275	0.00323922	0.00324738	0.178511	0.186283	0
Gm38009	0.000129715	0	0.000308626	0.000962882	0	0.000420299	0	0.0011083	0	0	0	0.000970784	0	0	0	0	0
Gm8818	0.00176443	0.00113156	0.00129478	0.000832539	0	0.000847288	0	0.0028833	0	0.000606635	0	0.00522955	0	0	0.0076595	0.0109712	0
E330020D12Rik	0.0217009	0.0432793	0.0710059	0.0258449	0.0445142	0.027702	0.00850388	0.00732665	0	0.0473796	0	0.0238034	0	0	0.0251808	0.0316972	0
Shcbp1l	0.00296081	0.00191217	0.00204355	0.000798086	0.00327482	0.00257945	0	0.000653104	0	0.000420022	0	0.00108993	0	0	0.0012565	0	0
Gm25588	0	0	0.00204983	0	0	0	0	0.00124282	0	0	0	0	0	0	0	0	0
Gm37669	0.000465627	0.000299241	0.000656214	0.00033269	0	0.000748412	0	0	0	0.000580412	0	0	0	0	0	0	0
Dhx9	1.16975	1.27853	1.41332	1.29414	1.18892	1.3461	1.1627	1.18544	0.561372	1.07379	0.494649	1.0037	1.11415	0.70192	1.14369	1.26121	1.19277
Npl	0.285352	0.252144	0.295552	0.280077	0.283674	0.315934	0.195777	0.26599	0.0306631	0.251225	0.330681	0.177424	0.264635	0.0650112	0.254835	0.12285	0.129869
Gm6652	0.0107203	0.0111132	0.0111603	0.00919611	0.00356669	0.0113874	0.00277327	0.00363061	0.00402999	0.008172	0	0.00304692	0.005184	0	0.0153222	0.0186498	0
Rgs16	0.00189375	0.00412465	0.0045361	0.00140788	0.00904927	0.000264523	0	0.00102726	0	0.00730105	0	0.11683	0	0	0.0577739	0.0388803	0
Gm28513	0.000503432	0	0	0.000409042	0	0	0.00049001	0	0	0	0	0.00154202	0	0	0	0	0
Rnasel	0.349643	0.45987	0.374212	0.440862	0.338869	0.306291	0.693707	0.377972	1.30719	0.327029	1.76009	0.535926	0.19143	0.375585	0.394633	0.471027	0.236199
Gm28512	0	0.000976583	0.000192967	0.00241771	0.00551743	0.000753744	0.00804918	0.00199179	0.0203379	0.000924638	0	0.010108	0	0	0.00465913	0	0
Rgsl1	0.000593806	0.000467078	0.00266883	0	0	0.00226404	0.000890034	0	0	0.000877199	0	0	0.00432381	0	0	0	0
Teddm2	0.00192031	0.00301572	0.00256031	0.000423394	0	0.00242201	0.00381782	0.000701369	0.00364199	0.00208643	0	0.00399202	0	0.00246875	0	0.00488707	0
Gm38352	0	0	0	0	0.00161709	0	0	0.000728777	0	0.00112542	0	0.0015407	0	0	0	0	0.0618646
Glul	1.00948	1.25662	1.08963	1.09412	1.08189	1.14102	1.07808	1.00877	1.05686	1.24798	1.07904	1.50284	0.660269	0.616094	1.21852	1.10608	1.09519
Gm29290	0	0	0	0.000354724	0	0	0	0.000333408	0	0	0	0.00104892	0	0	0	0	0
Gm29291	0.000289002	0.000164564	0.000422234	0	0	0.000222954	0	0	0	0	0	0.0043335	0	0	0	0.0132977	0
A830008E24Rik	0.000324723	0.000481942	0.000960546	0	0.00166398	0.0010954	0	0.000436707	0	0.000350006	0	0.00128594	0	0.00369317	0.0018398	0	0
Zfp648	0	0.000864688	0	0	0	0	0.00165766	0	0	0	0	0	0	0	0	0	0
4930452N14Rik	0	0.00062355	0	0.000530705	0	0	0	0.00142627	0.00464921	0	0	0.00401622	0	0	0.00159715	0	0
4930532M18Rik	0.000136212	0.00164585	0.000522666	0.000298841	0	0.0022748	0.00106491	0.000911352	0	0	0	0	0	0	0	0	0
Cacna1e	0.00255294	0.00490114	0.00322973	0.0112827	0.0197893	0.000562065	0.30172	0.0733242	0.00291162	0	0.0220981	0.0341177	0.0213399	0.0188294	0.0014747	0.0296785	0
Gm9530	0.00233556	0.00317601	0.00190314	0.00238729	0	0.0015899	0.00178021	0.00454502	0	0.00087625	0.165595	0.00499535	0.00431837	0.0102037	0.00204626	0.00438869	0
Ier5	0.388142	0.406034	0.358583	0.378309	0.475006	0.272206	0.709852	0.565773	2.21824	0.726712	3.1393	0.695227	0.959799	1.38623	0.499054	1.15757	1.88335
Mr1	0.0585793	0.0557232	0.0641245	0.0553865	0.0475222	0.0488841	0.0353392	0.0309955	0.00706589	0.0593684	0.0124051	0.053965	0.0117155	0.00864013	0.0462079	0.113021	0.0455901
Stx6	0.274219	0.276812	0.268746	0.277416	0.232162	0.257309	0.247818	0.263026	0.317774	0.303655	0.549278	0.315043	0.226132	0.292616	0.284412	0.298253	0.181978
Gm8850	0.000739801	0.000648997	0.00176766	0.00196559	0.00270207	0.000713438	0	0	0.00414318	0.00164358	0	0.00215133	0	0	0.00128721	0.00204375	0
BC034090	0.00560587	0.00912318	0.00657118	0.0121129	0.0148946	0.00723398	0.0108783	0.00734167	0	0.000382762	0	0.00238744	0	0	0.0035248	0	0
Gm37622	0	0	0	0.000319996	0	0	0.00242592	0.000907111	0	0	0	0.00156916	0	0	0	0	0
Xpr1	0.540283	0.546194	0.534232	0.537135	0.479894	0.492899	0.652458	0.567952	0.900544	0.679529	1.16883	0.585679	0.354011	0.618543	0.568919	0.448911	0.964748
Gm5532	0.000236047	0	0.000676423	0	0	0.00109516	0	0.000381078	0	0	0	0	0	0	0	0	0
Acbd6	0.395114	0.355231	0.377323	0.361823	0.343376	0.349876	0.31182	0.367344	0.266456	0.269046	0.16031	0.335241	0.431898	0.610593	0.37139	0.424426	0.139206
Qsox1	0.69984	0.766027	0.705047	0.773798	0.742225	0.690904	1.07782	0.80806	1.75655	0.7034	1.26106	0.917977	1.00314	1.6554	0.721059	0.53622	1.21515
Gm37571	0.000260072	0.000798717	0	0	0	0.000341769	0	0	0	0.00040779	0	0	0	0	0.00101816	0	0
Cep350	0.572295	0.55246	0.608833	0.592319	0.606275	0.491193	0.676473	0.582799	0.971513	0.597697	1.09183	0.553385	0.822559	0.692206	0.583556	0.754167	0.540682
Gm36934	0.000441677	0.000431633	0	0.000248861	0	0.0004997	0	0	0	0	0.0169636	0	0	0	0	0	0
Gm37383	0.0016814	0.00085319	0.00201687	0.000623062	0	0.00136017	0.00103913	0.000488117	0.0073692	0.00125425	0	0.00285815	0.00052314	0.0134691	0.00306936	0.00927672	0
Gm9694	0.00133311	0.0021518	0.000344417	0.000911345	0.00452786	0.000302564	0.000621437	0.00102301	0.00435671	0.000554477	0.0108014	0.000899837	0.0114642	0	0.00208044	0.0035068	0
Tor1aip1	0.427417	0.445794	0.454052	0.423037	0.510563	0.422667	0.547557	0.469498	1.35473	0.83029	1.36073	0.468637	0.709096	1.01947	0.39404	0.725591	1.0291
9430034N14Rik	0.0335068	0.0280635	0.0289592	0.037469	0.0436611	0.0274347	0.042896	0.0350613	0.12327	0.0529257	0.175329	0.0537695	0.0537435	0.115423	0.023259	0.0325343	0.0654358
Tor1aip2	0.540403	0.50334	0.564796	0.523898	0.415236	0.506476	0.495206	0.510551	0.508727	0.477268	0.544936	0.508195	0.554382	0.446072	0.550351	0.518764	0.405079
Tdrd5	0	0	0	0	0	0	0	0	0	0	0	0	0	0	0	0.0159663	0
Nphs2	0.000339636	0	0.000377809	0	0.00255547	0	0	0	0	0	0	0	0	0	0	0	0
Axdnd1	0.00271378	0.00232648	0.000585747	0.00132126	0.00922801	0.00178261	0.00172617	0.000897231	0.00852802	0.00291336	0	0	0.00203707	0	0	0	0
Gm2000	1.65103	1.709	1.71506	1.67821	1.84088	1.72651	1.36378	1.4889	0.372179	1.60039	0.306471	1.65409	1.09927	0.723669	1.6546	1.76893	1.07244
Soat1	1.16003	1.27006	1.14864	1.00495	1.29109	1.21007	1.10399	0.963558	1.67819	1.69996	1.68411	1.4988	0.833642	1.24431	1.3197	0.43808	1.26279
Gm37648	0.00278627	0.00296408	0.00365415	0.00356945	0.00707238	0.00257029	0.00559947	0.00235333	0.00974709	0.00445966	0.0173063	0.00273987	0	0.00677129	0.0081882	0	0
Gm10031	0.562982	0.56537	0.555413	0.584569	0.453723	0.499593	0.628042	0.6403	0.325396	0.4325	0.220519	0.575936	0.611922	0.647852	0.584263	0.634697	0.625643
Abl2	0.157109	0.165404	0.214272	0.183195	0.181362	0.131118	0.135929	0.114861	0.0401857	0.158299	0.0607586	0.201848	0.0748131	0.0543403	0.180753	0.246735	0.200366
Gm38043	0.00913059	0.00704637	0.0105376	0.0143913	0.00939792	0.00943451	0.00915318	0.0132104	0	0.0051076	0	0.0105422	0.00251483	0.0321296	0.00768608	0	0
Tor3a	0.181293	0.223816	0.229274	0.226016	0.226727	0.21892	0.102061	0.130187	0.0477667	0.352836	0.0671984	0.284277	0.0498002	0.0460344	0.215737	0.147982	0.371048
Fam20b	0.215234	0.243114	0.240296	0.253078	0.165157	0.245738	0.263009	0.249009	0.196479	0.220505	0.210469	0.200819	0.221571	0.162637	0.201064	0.319978	0.0669047
Gm15428	0.168494	0.0341728	0.0452181	0.0484517	0.208843	0.183851	0.0269473	0.224774	0.0111994	0.239166	0	0.00749083	0.716352	0.0260448	0.154099	0.27369	0
Ralgps2	0.017592	0.0153815	0.0205453	0.0185801	0.0324029	0.0262616	0.00875565	0.00432253	0	0.00857502	0	0.0209374	0.0199845	0.00206763	0.0210458	0.325083	0.0658455
Gm28693	0	0.000410375	0	0.000382628	0	0	0	0	0	0	0	0	0	0	0.00120625	0	0
Angptl1	0	0	0.000232835	0	0	0.000468005	0	0	0	0	0	0	0	0	0.000833748	0.00265933	0
Gm37802	0.000315043	0.000595634	0	0	0	0	0	0	0	0.00244312	0	0	0	0	0	0.00265933	0
Gm37943	0.00025684	0.000542179	0.000232835	0.000316137	0	0	0	0	0	0	0	0	0.00433819	0	0	0	0
Tex35	0.00014978	0	0	0	0	0.000302882	0	0	0	0	0	0.00152594	0	0	0	0	0
Rasal2	0.0886576	0.0745957	0.0538823	0.0793483	0.0720094	0.106755	0.047638	0.0852557	0	0.102888	0.015373	0.0491629	0.0333845	0.00545729	0.0737065	0.317759	0.212932
Gm37788	0.00163191	0	0.00147931	0.00246811	0	0.00360434	0.000537877	0.000387916	0	0.00129976	0	0	0	0	0.000859788	0	0
Gm37578	0.000173404	0	0.000342404	0	0	0.000969914	0	0	0	0	0	0	0	0	0	0	0
Gm37060	0.00586339	0.0036599	0.00289275	0.00292629	0	0.00287353	0.000526705	0.000986594	0	0.00140886	0	0.0042602	0.00330496	0.00850516	0.00760501	0	0
2810025M15Rik	0.350736	0.208712	0.304189	0.196651	0.330107	0.301647	0.0684125	0.213675	0.035198	0.359078	0.0239443	0.0971933	0.126918	0.00439775	0.302331	0.281828	0.676719
Cryzl2	0.1795	0.173956	0.185172	0.177579	0.278082	0.201796	0.134635	0.124271	0.102593	0.175663	0.0215111	0.130918	0.1452	0.11878	0.137347	0.191618	0.162452
Gm15486	0.000478598	0	0	0	0	0.000337676	0	0	0	0	0	0	0	0	0	0	0
Sec16b	0.356072	0.208388	0.24887	0.453325	0.294557	0.347192	0.410562	0.503738	0.0920475	0.0851209	0	0.215955	0.107949	0.0933411	0.306356	0.0721547	0
Gm37682	0	0.000169935	0.000266898	0.000715159	0	0	0	0	0	0	0	0	0	0	0	0	0
Astn1	0	0.000622954	0.000252181	0	0	0.000960846	0	0.000600697	0	0.003895	0	0	0	0	0	0	0
Gm4953	0.00200649	0.000475797	0.00356242	0.00253898	0	0.0012446	0.00279344	0.000606587	0	0.00130284	0	0.00373546	0.00493813	0	0.00235989	0.000968147	0
Cop1	0.214535	0.21239	0.227348	0.212219	0.183802	0.209118	0.245712	0.197649	0.882641	0.356468	0.782823	0.272035	0.412935	0.60008	0.233157	0.253479	0.287148
Gm37115	0.00156291	0.00212897	0.00156032	0.00139891	0.00170413	0.00140512	0.00167083	0.00371662	0	0.00223977	0.0334441	0.002801	0	0.0104313	0.00129149	0	0
Gm37088	0.000798985	0.00150336	0.00209465	0.000894558	0.008862	0.000484864	0.00419918	0	0	0.00286996	0	0	0.00771497	0.00523075	0.00515859	0	0
Scarna3a	0.000336764	0	0	0	0	0	0	0	0.00857575	0.00113087	0	0.00142663	0	0	0	0	0
Tnr	0.0101313	0.0121429	0.0109441	0.0202447	0.016634	0.0160537	0.018088	0.00958542	0.00758588	0.0110104	0.0468569	0.0150606	0.0049663	0	0.00837114	0	0.0317187
Gm37294	0.000652662	0.000365523	0	0	0.00206089	0.000790391	0.000893093	0.000444837	0	0	0	0	0	0	0.000959281	0	0
4930523C07Rik	0.439497	0.379708	0.352722	0.461167	0.327377	0.413505	0.620125	0.620531	1.17566	0.280191	1.01831	0.446154	0.711512	0.736344	0.429795	0.449138	0.26191
4930562F07Rik	0.0309926	0.0212267	0.0218942	0.0208224	0.0166676	0.0296743	0.000726272	0.00930614	0	0.00497488	0	0.00199938	0.000769767	0.00535296	0.00799705	0	0
Tnn	0.000918693	0.00126427	0.00127413	0.000379734	0.00108553	0.00371769	0.00397769	0.000800725	0	0	0.0381629	0.00235242	0.00290224	0.00839889	0.00147746	0.0161807	0
Mrps14	0.856387	0.802971	0.861211	0.832443	0.809378	0.817734	0.625731	0.722521	0.25653	0.690218	0.131971	0.691872	0.735712	0.649495	0.782627	0.76236	0.698683
Cacybp	1.07189	1.01455	1.29091	1.07399	1.05557	1.21834	0.725405	0.893517	0.351249	0.972843	0.297299	0.783509	0.785961	0.458978	0.998605	0.992956	0.706843
4933417C20Rik	0.00588302	0.00458215	0.00557687	0.00363742	0.00866271	0.00620957	0.00222148	0.00635751	0.010894	0.00526481	0.0115364	0.00344264	0.000929719	0.00316367	0.00321322	0.0112221	0
Rabgap1l	0.132988	0.0888321	0.0824464	0.128883	0.142476	0.106194	0.191248	0.1822	0.449458	0.212555	0.495373	0.0881406	0.434378	0.373521	0.0688793	0.86663	0.335883
Gm36975	0.000174331	0	0	0.000451856	0	0	0	0	0	0.00114212	0	0	0.00138838	0	0	0.0199821	0
9430087J23Rik	0.00157332	0.00151205	0.000540062	0.00112405	0	0.000329665	0.0025075	0.00248181	0	0.000372305	0	0.00195362	0	0	0	0	0
Gm37529	0.00113355	0.00204137	0.000375542	0.00228613	0	0.00330404	0.00308362	0.000520837	0.00564006	0	0	0.00119338	0.00248997	0.00708346	0.00252054	0.001307	0
Gm37212	0.000106148	0.000552564	0.000864057	0.000142938	0	0	0	0.00194804	0	0.00461401	0	0	0	0	0	0	0
Gm37215	0.00236265	0.00344736	0.00360454	0.00266797	0.0155598	0.00201353	0.00233407	0.00110165	0.00669127	0.00177136	0	0.00139139	0.00307651	0	0.000642742	0	0
Gm38302	0.00052951	0	0	0	0	0.000479206	0.00319098	0.000342981	0	0.00180358	0	0.000894569	0	0	0	0	0
6720464F23Rik	0.00390758	0.00299777	0.00216152	0.00523069	0	0.00417032	0.0127746	0.00244929	0.0247544	0.0050613	0.0104114	0	0.00156793	0.00244883	0.000980232	0.0417488	0
Gm37873	0.000193993	0	0	0	0.00510474	0	0.00165302	0	0	0	0	0	0	0	0	0	0
Gm37328	0.000675281	0.00159405	0.000620832	0.00174034	0.00130898	0.000542726	0	0.00112535	0.0156436	0.000398351	0	0	0.00198842	0	0.00239642	0.00747662	0
Gm38329	0.0368646	0.023803	0.0350233	0.0471984	0.0285283	0.0405803	0.0908495	0.0492331	0.0820555	0.0216719	0.0137219	0.0412562	0.0725273	0.0776436	0.0578301	0.079175	0
Gm38126	0.00172198	0.00151317	0.00148834	0.00190638	0.00441068	0.00246385	0.00613766	0.000787395	0.00370134	0.00119085	0	0.000941126	0.00191242	0	0.000965929	0	0
Gm37083	0.000224247	0	0.000948591	0	0	0	0.00100143	0.000617231	0	0.000965625	0	0	0	0	0	0	0
Gm6177	0.000208099	0.00022747	0.000394182	0	0	0	0	0.000743252	0	0	0	0.00189964	0	0	0.00127771	0	0
Rc3h1	0.472214	0.485679	0.608933	0.503348	0.54206	0.448393	0.49651	0.462462	0.711813	0.530297	0.797297	0.49379	0.477825	0.59687	0.436096	0.498137	0.57734
Gm37052	0.0185105	0.0163907	0.0151831	0.0184222	0.0209984	0.0179166	0.0161552	0.0189961	0.0444318	0.0136999	0.0902729	0.0114268	0.01034	0.0572606	0.022078	0.0243289	0.0418037
Gm37809	0.00370314	0.00509029	0.00509555	0.00680795	0.00742045	0.00334501	0.00588444	0.00362346	0.00779447	0.00376059	0	0.00222803	0.00187206	0.0146373	0.00674749	0.00152261	0
Gm37653	0.0110507	0.012329	0.00693746	0.0102435	0.0190144	0.00705417	0.0138232	0.012421	0.0114238	0.0157009	0.0731295	0.010846	0.000896491	0.0338242	0.00809717	0.0467759	0
Serpinc1	0.00283091	0.00220072	0.00496194	0.00366772	0.0128407	0.00314568	0.00578937	0.00393766	0.00648272	0	0	0	0.00648328	0	0.00242769	0	0
Gm37729	0.00041969	0.000314173	0.000586637	0.000447061	0	0.000380688	0.00170242	0	0	0.000667811	0	0	0	0	0	0	0
Gm37072	0.000365256	0.000312111	0.000820321	0.000884718	0	0	0.000552049	0	0	0.000773582	0	0	0	0	0	0	0
Zbtb37	0.0649601	0.110808	0.0730767	0.0950297	0.136816	0.0741104	0.145741	0.0955435	0.102018	0.0496325	0.272417	0.0880742	0.0505489	0.0564213	0.0630608	0.0796213	0
Gm37362	0.00075151	0.00331965	0.00123363	0.00189945	0	0.000713031	0.00207339	0.000692815	0	0.00166152	0	0.00109792	0	0	0.00181423	0	0
Gas5	1.67483	1.68111	1.7988	1.54225	1.89099	1.72674	1.12469	1.29813	0.692034	1.57359	0.823502	1.54529	0.846675	0.637887	1.66365	1.96834	1.19916
Dars2	0.302335	0.189275	0.203392	0.173106	0.245622	0.224462	0.129373	0.259318	0.0636807	0.133704	0.105186	0.137146	0.180522	0.0743612	0.295791	0.173836	0.0289462
Cenpl	0.410269	0.0800535	0.0862153	0.111107	0.226987	0.178201	0.0856847	0.521845	0.242626	0.226257	0.308609	0.0775037	0.504217	0.139401	0.513237	0.291937	0.078448
Klhl20	0.278076	0.259183	0.227063	0.24747	0.260497	0.230947	0.304067	0.293719	0.258148	0.257047	0.14546	0.263797	0.265061	0.265586	0.302426	0.466895	0.0391319
Ankrd45	0.00241688	0.00236742	0.00180938	0.00208972	0.00564987	0.0052449	0	0.000779962	0	0	0	0.0027984	0	0	0.0040599	0	0
Gm6185	0.0164026	0.0211414	0.0191429	0.00891878	0.027766	0.027102	0.00470175	0.00349999	0.0137764	0.00962959	0	0.00868414	0.00116423	0.00797684	0.0155929	0.00581253	0.0418216
Prdx6	2.31047	2.39727	2.31988	2.40897	2.27792	2.51077	2.38725	2.32007	1.77035	2.02249	1.40568	2.41359	1.85294	2.10909	2.42552	1.72425	1.04536
Tnfsf4	0.00027487	0	0	0	0	0	0	0	0	0	0	0	0	0.00145673	0	0.00664928	0
Gm15429	0.00526519	0.00743501	0.00266656	0.00673125	0.00490211	0.00291126	0.0027433	0.00698366	0	0.00564176	0	0.00296791	0.000510981	0	0.00520798	0.00688637	0
Gm5049	0.000126884	0	0.000927295	0	0	0	0	0	0	0	0	0	0	0	0	0	0
Fasl	0	0	0	0	0	0	0.00156518	0	0	0.000417437	0	0	0	0	0	0.236153	0
Gm37357	0.00130456	0.000842486	0.000361158	0.00115163	0	0.000549233	0.00706807	0.000261354	0.0350591	0	0	0	0	0	0	0	0
Suco	0.505582	0.467455	0.454145	0.519491	0.533995	0.528689	0.512818	0.48436	0.771819	0.384336	0.918259	0.463495	0.601836	0.614485	0.469355	0.816442	0.420044
Gm7496	0.000155869	0.000885321	0	0	0	0.000706331	0	0.00110679	0	0.00154495	0	0	0	0	0.00107376	0	0
Gm31925	0.000378954	0.00242172	0.000637526	0.00383977	0	0.00103065	0.000776532	0	0	0	0	0	0.00206221	0	0	0	0
4930558K02Rik	0.000551203	0	0	0	0	0	0	0	0	0	0	0	0	0.0187383	0	0	0
Pigc	0.229151	0.229576	0.206322	0.233711	0.205359	0.188991	0.237962	0.198367	0.245902	0.232065	0.250635	0.224399	0.188178	0.255545	0.259428	0.305209	0.474629
Dnm3	0.000878541	0.000868959	0.000925343	0	0	0	0	0.000660002	0	0	0	0	0	0	0	0.0117531	0
2810442N19Rik	0.000358792	0.00126376	0.000315582	0.000364955	0	0	0.000917155	0	0	0.00230051	0	0.00105977	0.00050419	0.00612637	0.00138089	0	0
Mettl13	0.169181	0.118113	0.162986	0.151959	0.179593	0.175618	0.077736	0.0903089	0	0.0860173	0	0.0528463	0.0310862	0.0150754	0.111601	0.122161	0.406954
Vamp4	0.173892	0.111659	0.170058	0.14677	0.10866	0.117025	0.203172	0.167991	0.405237	0.34115	0.439569	0.0879493	0.267446	0.376673	0.115159	0.33677	0.648866
Prrc2c	1.58712	1.68647	1.73145	1.70123	1.6052	1.6134	1.63088	1.55616	1.24282	1.47539	1.45071	1.58863	1.4141	1.31101	1.51489	1.95458	1.7017
Fmo4	0.0130514	0.00767805	0.00619857	0.0106427	0.0114873	0.0164552	0.00813002	0.00483456	0	0.000890401	0	0.00555399	0	0	0.00726163	0	0
Fmo1	0.106858	0.175881	0.171668	0.169335	0.127847	0.117804	0.240146	0.114106	0.0275361	0.0599334	0.0504074	0.200668	0.0129664	0.00537497	0.110283	0.0116668	0
Fmo2	0.00232683	0.00246432	0.00182839	0.00375428	0	0.000854674	0.000204542	0	0	0	0	0	0	0	0	0	0
Gorab	0.0930036	0.0879154	0.0759668	0.102633	0.0873386	0.0849371	0.0803086	0.0851125	0.0360387	0.0706359	0.0778729	0.0954479	0.107575	0.0869426	0.082097	0.0824316	0.216085
Gm24940	0.000153603	0	0	0	0	0.000480142	0	0.000518534	0	0.000683624	0	0	0	0	0	0	0
Rpsa-ps1	0.0101122	0.00737312	0.0075211	0.00993796	0.0195733	0.0120421	0.00598565	0.0113814	0	0.0113703	0	0.00645497	0.0151425	0	0.008278	0.00234741	0
Kifap3	0.245391	0.202039	0.179032	0.131857	0.267306	0.207764	0.0570063	0.125878	0	0.207889	0	0.196828	0.031758	0.0080656	0.223578	0.211022	0
Scyl3	0.15808	0.126392	0.146947	0.148941	0.190197	0.136588	0.159079	0.15646	0.16773	0.15107	0.287013	0.142963	0.149023	0.196432	0.136992	0.262789	0.119742
BC055324	0.0487382	0.0215569	0.0222135	0.0260465	0.0285326	0.040265	0.0133579	0.0412223	0	0.0229759	0.0158359	0.0110317	0.0498499	0.0239897	0.0533793	0.0204352	0
Mettl18	0.122743	0.0805819	0.0872087	0.087813	0.0840007	0.0779784	0.0509697	0.0947625	0.0421893	0.0468629	0.0130424	0.0623487	0.0591817	0.0231977	0.110958	0.0978696	0.14412
Sele	0.00400835	0.0106225	0.00631877	0.00333926	0.00533798	0.00507219	0.0201694	0.00269119	0.013275	0.0193195	0.0407376	0.0580436	0.00268731	0	0.0109603	0.0149033	0
Sell	1.80031	2.25851	1.86933	1.66762	1.92637	1.82372	1.91412	1.52504	3.60425	2.61794	4.32909	2.74614	1.54688	2.25439	2.31831	1.8292	1.10307
Selp	0.0166492	0.0413441	0.0158999	0.0232032	0.0143076	0.0134519	0.083741	0.0305162	0.251554	0.0734468	0.428281	0.156646	0.0128712	0.0618834	0.0823433	0.11342	0
Gm16587	0.0331958	0.0748845	0.0207523	0.0432299	0.0175177	0.0353848	0.0630534	0.0347466	0.0200743	0.0341214	0.0400168	0.246206	0.0247036	0.0466502	0.166262	0.00659626	0
Gm16548	0.0215798	0.031625	0.0172857	0.0445171	0.0206609	0.0245461	0.104005	0.0489314	0.113066	0.0145066	0.0218822	0.0472294	0.0741547	0.151264	0.0501641	0	0
F5	0.682369	0.982647	0.761071	0.984133	0.846962	0.769882	1.49412	0.916534	1.59004	1.13155	0.953463	1.52026	1.21473	1.70269	0.992377	0.0847258	0.551697
Gm16588	0.000358173	0.000198353	0.000697538	0.000706314	0	0	0	0.000701709	0.00597274	0.00451638	0.0140931	0.00190336	0	0.00864013	0.00116212	0	0
Slc19a2	0.157092	0.121639	0.14206	0.120336	0.130105	0.154173	0.103603	0.132085	0.0256113	0.114931	0.0441904	0.0938336	0.0443685	0.0420651	0.153297	0.0756962	0.0626163
Ccdc181	0.175437	0.167563	0.142469	0.153044	0.162162	0.144214	0.140987	0.168611	0.034247	0.102136	0.110843	0.175502	0.127901	0.0533423	0.186128	0.232279	0.061758
Blzf1	0.303914	0.310801	0.304946	0.271734	0.297455	0.269894	0.250538	0.293007	0.0983247	0.270779	0.0893308	0.279167	0.167195	0.250006	0.283316	0.317959	0.522753
Nme7	0.0651461	0.0568293	0.0558043	0.0593458	0.075446	0.0618656	0.0212233	0.0569839	0	0.0496579	0	0.0404242	0.0319344	0.00279649	0.0670558	0.0313942	0.0653688
Gm37411	0	0.000277403	0.000353368	0	0	0.000604962	0	0	0	0	0	0	0	0	0	0	0
Atp1b1	0.0889466	0.058489	0.0539806	0.167885	0.0689397	0.079765	0.127627	0.141413	0.00175125	0.00218083	0	0.0178914	0.0885201	0	0.0363642	0.711123	0
Gm32391	0.000742924	0	0.000279544	0	0	0.000360228	0	0.00133782	0	0	0	0	0	0	0	0	0
Gm20743	0	0	0	0	0	0	0	0	0	0	0	0	0	0	0	0.0362667	0
Xcl1	0.000339369	0.000280408	0	0.000395095	0	0	0	0	0	0.000757423	0	0	0	0	0	0.474081	0
Tbx19	0.00143988	0	0.00101279	0.00100558	0.002371	0.00071701	0.000479265	0	0	0	0	0	0	0	0	0	0
Gm16550	0.00195607	0.00174606	0.000550686	0.000769438	0	0.00111215	0.000779008	0	0	0.00157429	0	0.00238893	0.0145637	0	0.00155815	0.00844883	0
Sft2d2	0.598138	0.787444	0.638823	0.685195	0.684492	0.592073	0.779055	0.64168	1.13174	0.665317	1.37409	0.961431	0.439817	0.758968	0.714659	0.513913	0.723674
Tiprl	0.856099	0.710961	0.732593	0.702637	0.753191	0.702704	0.712215	0.897431	0.719139	0.61334	0.560536	0.707412	0.714491	0.723704	0.867172	0.768623	0.563251
Gm38190	0.0350529	0.0229219	0.0332364	0.0338301	0.0420001	0.0320011	0.0315225	0.0260205	0.0291207	0.0175948	0	0.016254	0.00863875	0.0281093	0.0325211	0.0536622	0.0529321
Gpr161	0.0325324	0.0227128	0.01912	0.0459526	0.0119564	0.0313375	0.0182995	0.0181064	0	0.00800866	0	0.00500371	0.00235734	0	0.0141486	0.00745318	0
Dcaf6	0.319467	0.371657	0.344497	0.327606	0.452646	0.313302	0.490832	0.358396	0.81781	0.333647	0.411264	0.378084	0.348998	0.708205	0.325184	0.588817	0.252258
Gm37864	0.0013732	0.000615344	0.00144712	0.00191022	0	0.000540465	0.00278446	0.000974554	0.0120241	0.00189329	0.0257891	0	0.0013104	0.00871055	0.000769328	0	0
Mpc2	1.22697	1.42248	1.32058	1.41249	1.30971	1.43105	1.71241	1.40865	1.84568	1.24296	0.940252	1.35868	1.38497	1.89267	1.2484	1.06467	0.677181
Gm37860	0.00573404	0.00724056	0.00948541	0.00831892	0.005192	0.00886542	0.00863691	0.00398469	0	0.00650559	0	0.00830556	0.0117749	0.00382209	0.00303583	0	0
Adcy10	0.001327	0.00127833	0.00193448	0.00104188	0.00903149	0.00174916	0.00636446	0.00406117	0.011679	0	0	0.00207237	0	0	0	0	0
Mpzl1	0.0548534	0.0495915	0.0437379	0.0806344	0.049356	0.0734403	0.134536	0.106169	0.0125368	0.0392359	0.00894982	0.0262014	0.144277	0.0929847	0.049588	0.00856897	0
Gm18407	0.00215557	0.00105929	0.00143444	0.00136183	0	0.00223081	0.00426964	0.00245513	0.0300125	0.00307649	0.0127479	0.00196681	0.00228731	0.0103445	0.00349097	0	0
Rcsd1	0.697036	0.746717	0.678584	0.791767	0.793926	0.593442	1.44558	0.994759	2.23921	0.767873	2.07414	0.923835	1.38925	1.78597	0.739861	1.01745	0.531843
Gm44458	0.00064829	0.00021459	0.000490061	0.000338216	0	0	0	0	0	0	0	0	0	0	0	0	0
Gm37073	0	0.000218731	0	0	0	0	0	0	0	0	0	0.00188147	0	0.00310636	0	0	0
Gm34767	0.000301086	0	0.000261146	0.000501161	0	0	0	0	0.0113705	0	0.00869918	0.00239562	0	0	0	0	0
Creg1	1.21518	1.35422	1.37417	1.31373	1.2188	1.34228	1.05227	1.05299	1.37787	1.5532	2.02884	1.33995	0.611361	0.596427	1.26547	1.38465	1.87979
Gm36972	0.000156944	0.00109417	0.000613416	0.000281735	0	0	0	0.000584665	0	0.000386499	0	0	0	0	0	0	0
Gm16565	0.00170673	0.00264743	0.00463576	0.00144621	0.0109443	0.00188188	0.00214184	0.00377214	0	0.00270887	0	0.00110093	0.00580496	0.00822417	0.00471086	0.0523456	0
Cd247	0	0.000189552	0	0.000429894	0	0.000387358	0	0	0	0	0	0.00107159	0	0	0	0.179622	0
Gm23402	0.00025464	0	0	0.00130537	0	0.000377186	0	0	0	0.000820777	0	0	0	0	0	0	0
Pou2f1	0.214811	0.134567	0.149548	0.148608	0.13138	0.16415	0.136247	0.255582	0.186066	0.168392	0.18003	0.137138	0.290133	0.131536	0.237235	0.322229	0.201578
Gm15853	0.00436372	0.00540261	0.00476682	0.00216319	0	0.0059461	0.00124319	0.00282802	0.027875	0.0118575	0.0386828	0.00523019	0.00757615	0	0.00287647	0.0232315	0
Tada1	0.0258566	0.0249365	0.0252459	0.0272384	0.0380188	0.0210085	0.0249866	0.0133606	0.0243799	0.0287037	0.0107027	0.0308148	0.0265934	0.0434666	0.0169603	0.0586151	0
Pogk	0.0510035	0.0559495	0.0378345	0.0375518	0.028098	0.0525612	0.0206991	0.0460713	0.0149815	0.0404072	0.0106303	0.0946903	0.0230711	0.0117875	0.0817091	0.320062	0.0456813
Gm16418	0.108245	0.120956	0.135542	0.10671	0.12712	0.127516	0.0812569	0.0824058	0.132803	0.114735	0.141728	0.0983307	0.146615	0.127711	0.0855726	0.16367	0.23951
Gm4954	0.000192771	0	0.00042182	0.00146081	0	0.000376334	0	0.000652388	0	0.00108173	0	0.0037651	0.00136077	0	0.00133633	0	0
Gm6286	0.00434513	0.00345941	0.00296343	0.0053902	0	0.00157521	0.00122351	0.00223937	0	0.00155401	0	0.00668652	0.00191354	0.00832419	0.00475651	0.00443559	0.0529818
Gm16701	0.000156618	0	0	0	0	0	0	0	0	0.00577847	0	0	0	0	0	0.08005	0.0413047
Fam78b	0	0	0	0	0	0.00036783	0	0	0	0.0397178	0	0	0	0	0	0.0559479	0.0932841
Uck2	0.77443	0.723245	0.811741	0.527333	0.805911	0.90391	0.193278	0.351982	0.0947168	0.75503	0.0641091	0.490669	0.229774	0.0607914	0.790288	0.75784	0
Gm37982	0.000101599	0.000565505	0.000570607	0	0.00110964	0.00066653	0	0.000491332	0	0	0	0	0	0	0	0	0
Gm2453	0.000609372	0.00124905	0.00121758	0	0.00450647	0	0	0	0	0.00359932	0	0	0	0	0	0	0
Tmco1	0.847941	0.820176	0.812924	0.805614	0.782543	0.841505	0.668029	0.813205	0.505115	0.940636	0.245278	0.739001	0.824766	0.72208	0.84249	1.06453	1.43557
Aldh9a1	0.925834	0.950568	1.02309	0.972934	0.928229	1.01442	0.656536	0.780199	0.134702	0.941414	0.0632602	0.757539	0.609706	0.276584	0.819929	0.719246	0.819555
Mgst3	0.249659	0.304955	0.260895	0.208733	0.248295	0.216853	0.119024	0.174467	0.0369284	0.335914	0.0409588	0.460362	0.119094	0.0911585	0.503006	0.437176	0.105543
Pbx1	0.0046374	0.00281584	0.00917197	0.00284993	0.0175981	0.0062118	0.00296091	0.00668694	0.822849	0.0549945	0.521878	0.00254353	0.396941	0.973683	0.0012562	0.564989	0.0992214
Gm38381	9.99e-05	0	0	0	0	0	0	0	0	0	0	0	0	0.00482091	0	0	0.0787292
Nuf2	0.861313	0.12914	0.244334	0.228423	0.625113	0.532883	0.110726	0.989969	0.0568411	0.450366	0.0660649	0.058348	1.10175	0.111471	0.890676	0.528502	0.0378408
Gm36980	0.000106062	0.000339411	0.00028529	0	0	0	0	0	0	0	0	0	0	0	0	0	0
Rgs5	0	0	0	0.000231514	0	0	0	0	0.00565674	0	0	0	0	0.00571556	0	0.0307349	0
Hsd17b7	0.521159	0.599956	0.432501	0.581114	0.444214	0.568474	0.958896	0.628174	0.0810508	0.320914	0	0.557786	0.275332	0.248163	0.501866	0.194306	0.15943
3110045C21Rik	0.0034816	0.00379028	0.00383452	0.00477662	0.00490158	0.00525655	0.0103748	0.00868013	0	0.000608826	0	0.00514781	0.00672359	0	0.00220459	0	0
Ddr2	0.0680703	0.0675263	0.0517701	0.0847143	0.0454937	0.0788654	0.22662	0.0902179	0.00507935	0.00656426	0	0.0329095	0.0188775	0.0104336	0.0333407	0.00326792	0
Uap1	0.393133	0.370406	0.377392	0.36573	0.308835	0.449178	0.321593	0.343643	0.128385	0.352998	0.10741	0.332369	0.40259	0.165414	0.338983	0.30993	0.330792
Gm37748	0.00010827	0.000765995	0.000506413	0	0	0	0	0	0	0	0	0	0	0	0	0	0
Uhmk1	0.47657	0.479885	0.469861	0.491915	0.410031	0.416463	0.60754	0.536281	0.492737	0.482571	0.379494	0.475383	0.449391	0.589614	0.436934	0.770809	0.47594
4930500M09Rik	0.00100573	0.000961772	0.00146841	0.00107454	0	0.00234056	0.00365153	0	0	0	0	0	0.00107259	0	0	0	0
Sh2d1b2	0	0	0.00049656	0	0	0	0.000611626	0	0	0.00114212	0	0	0	0	0	0	0
Gm6345	0.00220437	0.00237892	0.00405514	0.00298052	0.00567801	0.000926405	0.00121606	0.00113584	0.0357315	0.0048227	0.0152325	0.00369083	0.00278509	0.0262625	0.00251138	0.0240415	0
Sh2d1b1	9.42e-05	0.000788562	0	0	0	0	0.00195711	0	0	0.000746884	0	0	0.00101284	0	0	0.080237	0
Gm7694	0.0432666	0.0440455	0.0159228	0.0464745	0.0340272	0.0332759	0.134917	0.0944146	0.172467	0.0437113	0.0398881	0.0764111	0.208277	0.357582	0.0505281	0.136285	0
Nos1ap	0.012278	0.016366	0.0074837	0.0210343	0.0165891	0.0116322	0.0481994	0.0303601	0.065061	0.0063916	0.0242538	0.0252128	0.117671	0.160207	0.0175515	0.017678	0
Spata46	0	0	0	0.00101914	0	0.00099571	0	0	0	0	0	0	0.00955772	0	0	0	0
Gm7299	0.00862829	0.00847903	0.0134214	0.0119772	0.00302721	0.0114927	0.00876005	0.00856597	0.00342109	0.0226002	0	0.00493885	0.00579073	0.00457415	0.0143054	0.0319314	0.043109
Olfml2b	0.227391	0.119628	0.173928	0.194536	0.247815	0.203739	0.172424	0.163419	0	0.166749	0	0.0478129	0	0	0.0924032	0	0.0411559
Atf6	0.551629	0.561106	0.514145	0.462832	0.472005	0.500607	0.468823	0.448662	0.333382	0.717866	0.682824	0.679929	0.343497	0.419326	0.558227	0.608062	1.21006
Gm9929	0.010012	0.0112134	0.0103749	0.00645266	0.0206602	0.00394585	0.00507304	0.00533392	0	0.0091289	0	0.00422212	0	0.0111416	0.0108355	0.00488952	0
Dusp12	0.245747	0.150113	0.226064	0.137613	0.239655	0.193778	0.0558211	0.132242	0.00504617	0.176252	0	0.0825147	0.0158585	0.0109386	0.165805	0.190236	0.213728
Gm26620	0.0109421	0.0143086	0.019865	0.0124239	0.0010444	0.00929287	0.00509251	0.00315106	0	0.00718057	0	0.00665193	0.00267732	0	0.0075095	0.0105482	0
Fcrlb	0.000418178	0.00328717	0.00160733	0.00147342	0.00142513	0.00120086	0	0.000423871	0	0.00978459	0	0.0356703	0	0	0.0109498	0.00369842	0
Fcrla	0.00368588	0.00541385	0.00421443	0.00209378	0.00557626	0.00246638	0.00147112	0.00433468	0	0.0324762	0	0.0438455	0	0	0.0127827	0.338543	0
Gm2962	0.406353	0.418923	0.466918	0.455407	0.338943	0.453716	0.387556	0.351915	0.237826	0.414932	0.0877726	0.345219	0.601105	0.401225	0.322494	0.446783	0.173078
Fcgr2b	1.26559	1.57093	1.17398	1.37972	1.20676	1.14168	1.4165	1.39067	1.30651	1.81668	1.0516	2.25216	1.1811	1.11772	1.81739	0.610259	0.616968
Gm38204	0.000471818	0	0.000289374	0	0	0.000348245	0	0.001328	0	0.000677412	0	0.00474582	0	0.015856	0.00152001	0.00273412	0
Gm10522	0.00237572	0.00746147	0.0024956	0.00300512	0.00358779	0.00112162	0.0312153	0.00794913	0.00721502	0.0114123	0.00502019	0.138125	0.0397896	0	0.0157132	0	0
Fcgr4	0.00428642	0.015498	0.00282153	0.0111871	0.0277715	0.00510601	0.11462	0.0282381	1.57123	0.167391	1.82025	0.0836118	0.216849	0.614725	0.00274114	0.142732	2.46274
Fcgr3	1.08738	1.71765	1.28216	1.33524	1.21457	1.02802	2.0138	1.40089	3.00397	1.91613	3.18302	2.30542	1.41062	2.20764	1.73251	0.980835	2.05421
Mir6546	0.00012907	0.000273513	0	0.00039933	0	0	0	0	0	0	0	0	0	0	0	0	0
Cfap126	0.00117303	0.00394887	0.00316669	0.00154395	0.00326797	0.00350524	0.000569082	0	0.00631582	0.00328826	0.0257429	0.00422342	0	0	0.00144481	0.0139407	0
Sdhc	0.738256	0.676603	0.793233	0.670857	0.692809	0.679561	0.545364	0.592305	0.318814	0.800256	0.220457	0.581396	0.632579	0.551319	0.682306	0.777183	0.644543
Mpz	0.00564415	0.00717037	0.0104463	0.00765238	0.0189881	0.00740413	0.00644648	0.00417153	0	0.00455661	0	0.0117074	0	0	0.0023801	0	0
Pcp4l1	0.00193539	0.000930681	0.000587798	0.00226204	0	0.000927522	0.00177378	0.000574992	0.0188674	0.00841766	0.0205708	0.00187364	0.00694882	0.00382209	0.00116213	0.141532	0
Tomm40l	0.00601512	0.00411802	0.00517937	0.00480773	0	0.00512973	0	0.00291487	0.00589157	0.00166413	0	0.00290268	0.00243652	0	0.00218676	0.00175027	0
Apoa2	0.00113592	0.000904286	0.00163436	0.00104469	0	0	0.00664852	0.00150107	0.0354568	0.000530641	0.0137665	0.00130802	0.00662967	0.0262174	0.00499193	0.00534507	0
Fcer1g	1.43036	1.96309	1.32801	1.43226	1.64647	1.43977	2.40073	1.83748	3.89478	2.48294	3.79049	2.46549	2.82459	3.68006	1.9885	2.09889	3.39206
Ndufs2	0.668452	0.574089	0.664178	0.560985	0.701231	0.594675	0.491599	0.529791	0.493682	0.759849	0.371653	0.538081	0.717789	0.718088	0.640827	0.704129	0.886752
B4galt3	0.00791264	0.00442885	0.00525303	0.00820972	0.0111099	0.00965557	0.0206212	0.0188923	0.0895503	0.00477394	0.0754483	0.00684275	0.0209692	0.058664	0.00158656	0.00373321	0
Ppox	0.102096	0.0845686	0.0577524	0.0904536	0.182347	0.0803239	0.182785	0.132015	0.361706	0.0972795	0.492835	0.0998461	0.285952	0.298046	0.103218	0.172278	0.156346
Usp21	0.257237	0.219198	0.222813	0.221223	0.210792	0.198927	0.274841	0.260956	0.282777	0.252785	0.495383	0.221585	0.389819	0.343638	0.23629	0.354747	0.429237
Ufc1	0.851252	0.832596	0.907926	0.77804	0.933567	0.816147	0.593802	0.654127	0.37936	0.871486	0.290887	0.790202	0.513405	0.405013	0.770053	0.54362	0.494139
Rpl27-ps1	0.0034697	0.00239855	0.00279975	0.00140872	0	0.00302755	0.00313864	0.00119879	0	0.00398979	0	0.00458121	0.00699282	0	0.000417108	0.00473335	0
Gm20045	0.0173848	0.0138357	0.0146414	0.013302	0.0406435	0.0124252	0.0241822	0.0196044	0.0174315	0.025883	0.0210162	0.0173853	0.0159534	0.0695338	0.00404076	0.0074204	0
Dedd	0.0112635	0.0121541	0.0117719	0.00792332	0.0279561	0.00971648	0.0121147	0.0135669	0.0337331	0.0133228	0	0.0107548	0.0424147	0.026371	0.0225371	0.00364215	0
Nit1	0.1239	0.121292	0.0940344	0.122879	0.147112	0.113208	0.130921	0.117929	0.160638	0.103095	0.262854	0.122846	0.129257	0.121347	0.116743	0.185197	0.300308
Pfdn2	0.583165	0.509728	0.58496	0.514834	0.545265	0.577902	0.445045	0.5405	0.412247	0.520803	0.389439	0.441947	0.58352	0.537147	0.505282	0.64835	0.821562
Gm37154	0.00444272	0.00520967	0.00481769	0.00412657	0.0169045	0.00394974	0.000988192	0.00313621	0.00354974	0.00786469	0	0.00516247	0	0	0.00468699	0.00951201	0
Nectin4	0.00583882	0.0246173	0.01164	0.0112231	0.0106023	0.0137925	0.00304029	0.00247195	0.0672855	0.0450853	0.162079	0.0276417	0.0247211	0.0483589	0.0118036	0.0535367	0
Arhgap30	0.757932	1.00712	0.854828	0.812465	0.804186	0.677871	1.33957	0.888334	2.44117	1.4226	2.60573	1.29253	1.55035	2.10155	1.04261	1.25654	1.67479
Usf1	0.257369	0.233787	0.26929	0.220162	0.276052	0.219908	0.273033	0.254721	0.393202	0.332835	0.427839	0.270063	0.24313	0.268555	0.282975	0.220205	0.136455
Tstd1	0.012429	0.00714288	0.0117016	0.00579716	0.0178473	0.00813548	0.0102782	0.0102557	0.0838768	0.0159942	0.0713351	0.00770695	0.0172298	0.00599146	0.00480036	0.00994548	0.166709
Gm26641	0	0	0.00160216	0.000988166	0	0	0	0	0	0	0	0	0	0	0	0	0
F11r	0.0399608	0.0500122	0.0400208	0.0605581	0.0264981	0.0338858	0.0946915	0.0942988	0.0125239	0.0231349	0	0.0835118	0.0156677	0.00210869	0.0802365	0.0435387	0
B930036N10Rik	0.0345154	0.0226623	0.0376807	0.0354448	0.0513935	0.0256004	0.0228193	0.0248234	0.0448415	0.0344143	0.0110302	0.0252746	0.0919778	0.141292	0.0355599	0.0512658	0
Alyref2	0.0691317	0.0984748	0.0569508	0.0604959	0.0649505	0.0577174	0.0700961	0.0653029	0.106864	0.0847246	0.0896723	0.123551	0.0854539	0.0893037	0.0944575	0.0866192	0.575334
Itln1	0.000178648	0	0	0	0.00126408	0	0	0.000479707	0	0	0	0.000861967	0	0	0	0.0961428	0.0890977
Cd244	0.00291906	0.00844296	0.00163583	0.000292453	0.00751492	0.00223196	0	0.00249889	0.0329797	0.0514321	0.732395	0.0301653	0.00383524	0	0.0135736	0.555056	0.977199
Ly9	0.00486041	0.00273516	0.00557391	0.00156103	0.0229301	0.00727967	0.0013191	0.00056088	0.00759644	0.17075	0.17882	0.00340064	0.0446863	0.0214593	0.0123727	0.492565	0.281995
Slamf7	0	0	0	0	0.00487314	0	0	0	0.0147587	0.0133952	0	0	0	0	0	0.403545	0.0332514
A630035G10Rik	0.00011751	0	0	0	0	0	0	0	0	0.00181027	0	0	0.00377673	0	0	0.0332551	0
Gm37981	0.000562998	0.000258241	0.00032075	0.000406436	0	0.00133265	0	0	0	0.00138119	0	0	0.0005897	0	0	0.0368519	0
Cd48	0.002714	0.00248634	0.00662101	0.00692595	0.0296359	0.0026535	0.00104547	0.000426705	0.131907	0.558799	0.117077	0.00905129	0.139185	0.0823885	0.000847729	1.03051	1.32469
Gm37010	0	0	0	0	0.00189392	0	0	0	0.00631241	0.00181562	0	0	0.00364561	0	0	0.179843	0.0418037
Tma7-ps	0.0900789	0.0881025	0.102502	0.108163	0.0873982	0.0956311	0.095989	0.0877544	0.19837	0.125863	0.114421	0.123057	0.330271	0.332621	0.077904	0.215246	0.141682
Slamf1	0.00135328	0.000558686	0.0020282	0.000218253	0.00954809	0.000975875	0.00106537	0	0	0.00251628	0.0198566	0	0.00136778	0.0100263	0.00128167	0.107466	0
Cd84	0.770427	1.03784	0.687344	0.87681	0.806153	0.777538	1.50453	0.970213	2.30891	1.11142	2.62311	1.56226	0.453498	0.762327	0.855756	1.10137	0.831071
Gm10521	0.00932469	0.0139928	0.00825653	0.0128325	0.0103699	0.0107472	0.0382732	0.0070828	0.0536541	0.0132994	0.0884196	0.0468907	0.00325118	0.008571	0.0177209	0	0
Gm37065	0.00284683	0.00121202	0.00226443	0.00103596	0.00220208	0.00381785	0.00211827	0.00138567	0.00430681	0.000649936	0	0.00217179	0.00748903	0	0.00279952	0	0
Slamf6	0.000133955	0	0	0.000586111	0	0.000354149	0	0	0	0.0101065	0	0	0	0	0.00100148	0.339741	0
Vangl2	0.0359686	0.0371091	0.0370924	0.0231583	0.0639966	0.0488888	0.0112995	0.0180581	0	0.0509267	0.0341666	0.0285086	0.00139261	0	0.0400739	0.0766821	0.0332514
Nhlh1	0.000181778	0	0.0020086	0.000354383	0	0	0	0.00109183	0	0	0	0	0	0	0	0	0
Ncstn	0.706006	0.763227	0.678935	0.774526	0.679611	0.683879	0.922368	0.779953	1.14771	0.840775	1.08244	0.888835	0.926172	1.19583	0.707305	0.724386	1.31074
Copa	1.30649	1.32291	1.37141	1.27834	1.28508	1.29677	1.18609	1.14015	1.12857	1.2411	1.10216	1.29639	1.09288	1.19118	1.22606	1.2493	1.32173
Gm38164	0.000742674	0.000856168	0.00331969	0.00334231	0	0.000538938	0	0.00262999	0	0.000860363	0	0.0012753	0.00386948	0	0.00422333	0	0
Gm37756	0.000602544	0.00219557	0.00147926	0.00163335	0	0.00106877	0.000611707	0.00190774	0	0.00535111	0	0.000675716	0	0	0.000670527	0	0
Pex19	0.343753	0.302741	0.291579	0.3141	0.28947	0.316582	0.271247	0.308046	0.47619	0.336369	0.480567	0.273445	0.337461	0.403995	0.314106	0.41057	0.516968
Gm10171	0.00123124	0.000196013	0.0014632	0.000657758	0.00774444	0.0047712	0	0.00111929	0	0.000830186	0	0.00147612	0	0	0.00114695	0.00313844	0
Dcaf8	0.589347	0.581527	0.613412	0.588965	0.67008	0.575659	0.517424	0.510275	0.469308	0.543886	0.738225	0.548713	0.481571	0.453814	0.510343	0.814714	0.72328
Pea15a	0.120565	0.146067	0.116476	0.0908202	0.17711	0.12115	0.0974288	0.142804	0.0356354	0.237022	0.0530025	0.21237	0.0217381	0.0378328	0.233657	0.356421	0.329431
Casq1	9.81e-05	0.000656275	0.000463242	0	0.00260942	0.000317541	0	0	0	0.00168013	0	0	0	0	0	0	0
Igsf8	0.143646	0.168752	0.154911	0.135687	0.20289	0.214072	0.0882404	0.134717	0.0677276	0.45322	0.180993	0.134477	0.426317	0.198289	0.167373	0.302145	0.322279
Atp1a2	0.000226067	0.00435264	0	0	0	0	0	0	0.00504965	0	0.0124708	0	0	0.00250417	0	0.00263196	0
Kcnj9	0	0.000357633	0.000186872	0	0	0	0.000446392	0	0	0	0	0	0	0	0	0	0
Kcnj10	0.013498	0.0268783	0.0133477	0.0252743	0.0167319	0.00999673	0.0119252	0.0153127	0	0.00334401	0	0.0198454	0.011161	0	0.0140735	0	0.0819641
Pigm	0.289745	0.374522	0.319238	0.376445	0.356035	0.334347	0.419704	0.356604	0.332811	0.289881	0.501826	0.391059	0.331106	0.241818	0.354949	0.41708	0.351442
Gm37145	0.00160815	0.00286767	0.000828224	0.00145532	0	0.00297568	0	0.000709359	0	0.00597738	0	0.00336889	0	0	0.00231793	0.00239875	0
Slamf9	0.0520508	0.0460441	0.0299513	0.0469745	0.0428912	0.0662991	0.0117902	0.0330629	0	0.0377915	0	0.023685	0.00853317	0	0.0376453	0.075483	0.118739
Igsf9	0.000375219	0.000510339	0.000487034	0.000339953	0	0.00147632	0.000843425	0	0	0.00426739	0	0	0.000778653	0.00489284	0.00120662	0.00915241	0
Tagln2	2.0738	2.11039	1.94058	2.15604	2.05998	2.12456	2.31586	2.47033	1.24616	2.15006	1.79113	2.42689	2.92518	2.09651	2.56022	2.63847	1.6473
Gm37125	0.00420364	0.00437802	0.00199488	0.00619759	0.00499546	0.0027258	0.00744497	0.00531782	0.00483769	0.00287291	0	0.0100631	0.0449254	0.0704182	0.00511384	0.0765409	0
Cfap45	0.00104057	0.00308675	0.000587556	0.000395095	0	0.00226637	0.00122983	0.00215217	0.00501644	0.00225674	0.106389	0.0123613	0.0151299	0.0185183	0.00341138	0.00405969	0
4933439K11Rik	0.00225444	0.00405571	0.00151665	0.00410424	0	0.000339425	0.0105272	0.00478136	0.108378	0.00360705	0.0952086	0.0045303	0.0299826	0.0582345	0	0.0242965	0.0608427
Slamf8	0	0	0	0	0	0	0	0	0	0.00314343	0	0.001109	0	0	0	0.00175125	0
Dusp23	0.127498	0.116758	0.132449	0.115113	0.119447	0.130352	0.0668777	0.0649622	0.0399569	0.130813	0.02709	0.0941846	0.0804671	0.0392909	0.0783946	0.336315	0
Gm2710	0.0034447	0.00446456	0.00392378	0.0013268	0.0139842	0.00256263	0.00117838	0.00612955	0	0.00315555	0	0	0.0178759	0.00801879	0.00332988	0.00342912	0
Fcer1a	0.00101639	0.000240392	0.000372553	0.000359195	0.0123984	0.000309627	0.00330544	0	0.0556754	0.00924317	0.0466661	0	0.0761031	0.00931601	0	1.93827	0
Ackr1	0	0	0	0	0.00464427	0	0	0	0	0	0	0	0.000953327	0	0	0.138204	0
Cadm3	0	0	0	0	0	0	0	0	0	0.000780537	0	0	0	0	0	0.0147523	0.0378408
Aim2	0.419521	0.479705	0.406419	0.251603	0.663137	0.444221	0.179011	0.214745	0.147472	0.685243	0.656356	0.660065	0.106153	0.0896516	0.58997	0.702562	1.13424
Ifi206	0.00018974	0	0	0	0	0.000288881	0	0.000974053	0	0.0104685	0	0.00123283	0	0	0	0.0326564	0
Ifi214	0.00524722	0.0165488	0.00647393	0.00289302	0.0306696	0.0115547	0.00170808	0.00437703	0	0.174565	0.0128388	0.023554	0.00541207	0	0.00871441	0.105988	0.202493
Ifi213	0.000131587	0	0	0.000359316	0	0	0	0	0	0.0126952	0	0	0	0	0	0.0101614	0
Ifi209	0.0319244	0.0661319	0.0500167	0.0115628	0.141396	0.0671671	0.00847824	0.0190953	0.0419568	0.569018	0.0256356	0.101891	0.0131452	0.00387373	0.0325622	0.49437	0.396707
Pydc3	0.000369871	0.000406084	0	0	0	0	0	0	0	0.029769	0	0.00155865	0.00175229	0	0	0.231806	0.103203
Gm18752	0.000492077	0	0.000371323	0	0	0	0	0	0	0.000484682	0	0	0	0	0.000555275	0	0
Gm7871	0.000168875	0	0	0	0	0	0	0	0	0.0013629	0	0.00297477	0	0	0	0	0
Ifi207	0.000245532	0.000868435	0	0.000839805	0.00537656	0.000297531	0	0.00176194	0.00875572	0.195592	0	0.0266785	0.00224469	0	0.00208432	0.00151798	0.117112
Ifi204	0.00357302	0.00466735	0.00443347	0	0.0383484	0.00391795	0	0.000244072	0.00488361	0.232262	0	0.0106035	0.057261	0.00145673	0.000875954	0.197301	0.167145
Ifi203-ps	0	0	0	0	0	0	0	0	0	0.0235634	0	0	0.00106099	0	0	0.0238359	0.30462
Mndal	0.00566866	0.00920099	0.00791301	0.00169541	0.0416959	0.00782576	0	0.000367107	0	0.152655	0	0.00504061	0.00402634	0	0.00911773	0.271173	0.258887
Mnda	0.000499384	0.000787382	0.000749147	0	0.00221195	0.000577593	0	0.00125284	0.0189132	0.187546	0	0.00125333	0.00144799	0.00470868	0	0.073252	0.218506
Ifi203	0.02117	0.0333202	0.0224973	0.00209139	0.0829624	0.0216215	0.00644005	0.000959382	0.0103399	0.393643	0.0311781	0.0185672	0.0130008	0.0133212	0.0155968	0.564416	0.73074
Ifi202b	0.00410282	0.00659435	0.00670689	0.00170144	0.105729	0.0038267	0	0.00162225	0.0821519	1.08703	0.0344722	0.0326459	0.0139015	0.0370709	0.00106302	0.334743	1.03652
Ifi205	0.000137002	0.000330007	0	0	0	0	0	0	0	0.0106931	0	0	0	0	0	0.049923	0.0391319
Olfr433	0.000240326	0.000793871	0.000753363	0	0.0108039	0.00113535	0	0	0.0135298	0.02316	0.00915687	0.00220729	0	0.00956531	0.00235978	0.0152612	0
Olfr432	0.000214515	0.000403625	0	0	0	0	0	0	0	0.0144312	0	0	0	0	0	0	0
Spta1	0.000113979	0	0	0	0.0981034	0	0	0	0.00783029	0.00173748	0	0	0.0121803	0.011422	0	0.81492	0
Olfr417	0	0	0	0	0	0	0	0	0	0	0	0	0	0	0	0.0105104	0
Fh1	0.491128	0.431503	0.512588	0.431283	0.567039	0.53683	0.260292	0.348256	0.0357318	0.459104	0	0.318122	0.290418	0.0748415	0.444655	0.519858	0.27516
Kmo	0.00156565	0.00741871	0.00342617	0.000229311	0.00442713	0.00386877	0	0.000974554	0	0.0669714	0	0.0078096	0.00288543	0	0	0.138527	0.0797978
Opn3	0.00323937	0.00414261	0.00896674	0.00108995	0.00865477	0.00270692	0.0056808	0.00431954	0	0.0209908	0	0.00215313	0.00639312	0	0.00587319	0.0125098	0.0456813
Chml	0.143177	0.221565	0.194199	0.208623	0.220162	0.206948	0.15881	0.173262	0.0140728	0.159877	0.0237771	0.175433	0.0987076	0.0135441	0.15278	0.102814	0.0352307
Exo1	0.324484	0.215036	0.142223	0.295589	0.294379	0.525608	0.20456	0.310656	0.0342207	0.141799	0.0144066	0.0831114	0.213477	0.0124331	0.28989	0.241865	0
Gm38100	0.000374757	0.000211787	0	0.000273921	0	0.000954719	0	0.000714268	0	0	0	0	0	0	0	0	0
Rbm8a2	0.186647	0.142452	0.145044	0.146608	0.17411	0.173559	0.0906339	0.16867	0.071399	0.159704	0.0859378	0.133786	0.199253	0.133403	0.192748	0.152253	0.0657714
Cep170	0.267951	0.318049	0.29286	0.282695	0.312171	0.272123	0.372079	0.290608	0.67955	0.414125	0.670552	0.399132	0.294258	0.409011	0.338937	0.217114	0.755051
3110062G12Rik	0.000374883	0.000288257	0	0.000692499	0	0	0	0.000383851	0	0.00251381	0	0.000907445	0	0	0.00153944	0	0
Gm38104	0.00360484	0.00707128	0.00567942	0.00271862	0.00128104	0.00299172	0.00256786	0.00242222	0	0.00498606	0.0134645	0.00461935	0.00418934	0	0.00258552	0	0
Gm36992	0	0	0	0	0	0.000227053	0.000421611	0	0.00954818	0	0	0	0	0	0	0	0
Sdccag8	0.108282	0.106808	0.0926196	0.0956531	0.177403	0.113957	0.139487	0.124793	0.209787	0.2259	0.15933	0.155303	0.138264	0.249172	0.102779	0.161181	0.587157
Gm38158	0.00420005	0.00502862	0.00693798	0.00970403	0.00793471	0.00276078	0.00776931	0.00868812	0.0110877	0.00545113	0	0.00782031	0.00337502	0	0.00589309	0	0
Gm37246	0.000170599	0.000887212	0	0	0	0	0	0	0	0.00224387	0	0.00067306	0	0	0	0	0
Gm37490	0.00278228	0.00101433	0.00176882	0.0012289	0.0130795	0.00240337	0.00412927	0.00174431	0.0160194	0.005535	0	0.00896654	0.0139487	0.0147406	0.00375119	0	0
Gm15423	0.000138833	0.000299617	0.000863178	0	0.000621628	0.000623466	0	0	0	0.00155747	0	0	0	0	0.00110056	0	0
Gm37519	0.0018408	0.00140729	0.00214344	0.00343226	0	0.000463158	0.00223609	0	0	0.00459887	0.0127001	0.00294769	0	0.00883212	0.00152281	0	0
Akt3	0.134816	0.122855	0.114686	0.129254	0.17564	0.169202	0.0799775	0.14132	0.0717209	0.183188	0.0251969	0.128918	0.116948	0.0143869	0.1915	0.319861	0.452058
Gm37960	0.0017461	0.000862688	0.00109807	0.00155844	0.00201323	0.00378554	0.00184267	0.00126909	0	0.00339676	0	0	0.00794008	0	0.00226625	0	0
Gm37106	0.000466743	0.000985384	0.00033674	0.000729836	0	0.00048377	0	0	0	0.000561154	0	0	0	0	0	0	0
Gm37598	0.00208927	0.000886782	0.00102834	0.000507159	0	0.00182704	0.00136672	0.00176653	0	0.00283875	0	0	0	0.00812372	0	0.00970597	0
Gm38146	0.000177804	0	0	0.000319286	0.00124178	0	0	0.000432152	0	0	0	0.0013112	0	0	0.00131407	0	0
Gm37706	0.00106846	0.00204134	0.00159949	0.00147817	0.000800696	0.00114996	0.000839903	0.0016423	0	0	0	0.00164707	0.00483758	0	0	0.00175125	0
Gm37463	0.000554779	0.0010696	0	0	0	0.000705294	0.00048634	0	0	0	0	0.00113741	0	0	0	0	0
Gm26801	0.00329873	0.00382024	0.00441998	0.00199418	0.011533	0.00577583	0.000507285	0	0	0.0109903	0	0.00615745	0	0	0.00429675	0	0
Zbtb18	0.589599	0.601611	0.545693	0.535136	0.661186	0.553441	0.483187	0.559086	0.463369	0.674095	0.410197	0.532385	0.562878	0.346408	0.622646	0.390502	0.532928
Gm37306	0	0.00203697	0.000607083	0.00226959	0	0	0.000272739	0	0	0.000670125	0	0.00101157	0.000581628	0	0.00292668	0	0
2310043L19Rik	0.000163813	0	0.000435745	0	0	0	0	0.000469941	0	0	0	0	0	0	0	0	0
1700016C15Rik	0.000546499	0	0.000870778	0.00316976	0.00419598	0.001003	0	0.00067615	0	0	0	0.00133507	0.00252958	0	0	0	0
Adss	0.912298	0.914161	0.884685	0.900535	0.977515	0.994538	0.976906	0.874884	0.910432	0.991659	0.212734	0.958974	0.793805	1.12283	1.01574	0.945052	0.9404
Gm16585	0.0014335	0.00141365	0.00316403	0.00337966	0.0101778	0.00143173	0.000583537	0.0033793	0	0.00316199	0	0.00329814	0.00231799	0.00246836	0	0	0
Gm16432	0.000163921	0	0	0	0	0	0.000833847	0	0	0.000919767	0	0	0	0	0	0.0077527	0
Gm37313	0.000260122	0.000851455	0.00121649	0.00130851	0	0	0	0	0	0	0	0.00243685	0	0	0	0.00151644	0
Gm8010	0.000544882	0.000615238	0.000411861	0.000611448	0	0	0	0.000323883	0	0	0	0	0	0	0.000634591	0.00101548	0
Desi2	0.315244	0.282314	0.323158	0.292795	0.256454	0.289703	0.281125	0.273969	0.101986	0.270203	0.0740976	0.253539	0.162629	0.10414	0.280884	0.363834	0.493376
Gm37486	0.135486	0.0891362	0.0722666	0.0874787	0.0986072	0.101417	0.0764719	0.173766	0.367323	0.0973749	0.463107	0.0846161	0.285969	0.319513	0.16854	0.174273	0.342976
B230369F24Rik	0.0132968	0.0167602	0.00972918	0.0175726	0.0180308	0.0152126	0.0281932	0.0150321	0.0104844	0.00693477	0.0146777	0.0209448	0.01907	0.0350305	0.0166873	0.0153926	0.0391319
Cox20	0.00788196	0.00687456	0.00548447	0.00498433	0.0139591	0.00390467	0.00778753	0.0067536	0	0.0101857	0	0.0070489	0.00253158	0	0.00914814	0.00667837	0
Hnrnpu	2.27107	2.28461	2.41943	2.32366	2.19642	2.33393	2.07622	2.19938	1.89028	2.14647	2.15802	2.0163	2.29669	1.91919	2.23959	2.37744	2.05535
Gm38300	0.00616293	0.00908275	0.00552198	0.00959269	0.0105423	0.00611632	0.00771377	0.00699801	0	0.0104641	0.0117486	0.0132728	0.00423353	0.00692761	0.00285192	0	0
Efcab2	0.0438749	0.0193013	0.0204241	0.020018	0.0098134	0.0125856	0.056808	0.0444085	0.0947191	0.0196567	0.0723277	0.0178913	0.0887113	0.0815232	0.0307459	0.0548626	0.204611
Kif26b	0.0171961	0.0321047	0.0148495	0.00808479	0.0398505	0.0381575	0.00394847	0.0037039	0.00842602	0.0222686	0	0.0417068	0.00144303	0	0.0253432	0.0160484	0
Gm34176	0	0	0.000284371	0	0	0.000275133	0	0.000755051	0	0	0	0	0	0	0	0	0
Smyd3	0.232372	0.17949	0.145309	0.189232	0.235927	0.228195	0.110034	0.173709	0.0265621	0.118116	0.0420143	0.100437	0.083879	0.0158479	0.139834	0.274514	0.124033
Gm5561	0.000697566	0.0020123	0.00105494	0.00121039	0.00195699	0.00279253	0.00145114	0.00143259	0	0	0	0.00173135	0.000716456	0.00993539	0.00154642	0.00133017	0
Tfb2m	0.258027	0.216749	0.317195	0.229751	0.234728	0.241763	0.159959	0.208064	0.0219303	0.192529	0.0239369	0.157908	0.0872124	0.0966804	0.216661	0.246834	0.286098
Gm15480	0.000141447	0	0.000642631	0.00055344	0	0	0	0.000550301	0	0	0	0	0	0	0	0	0
Cnst	0.167264	0.160724	0.166089	0.181328	0.193393	0.173401	0.201036	0.18089	0.384103	0.153824	0.384663	0.152992	0.196089	0.249049	0.130355	0.263912	0.354058
Sccpdh	0.123078	0.12721	0.129632	0.11146	0.135809	0.158156	0.0521548	0.0788185	0	0.086795	0	0.0826428	0.00904914	0	0.11977	0.148486	0.0484116
Ahctf1	0.31741	0.253128	0.31052	0.282816	0.387031	0.306358	0.259846	0.328197	0.21677	0.223671	0.13405	0.202887	0.168143	0.178623	0.322607	0.489259	0.262526
Gm37070	0.0032624	0.00393044	0.00240413	0.00431329	0	0.00619382	0.00187444	0.0013605	0	0.00751419	0	0.00663227	0.00299193	0	0.000980232	0.00336111	0
Cdc42bpa	0.0487046	0.0392055	0.0671983	0.0309904	0.0870939	0.0703296	0.0164248	0.0342182	0.013978	0.0725097	0	0.0195092	0.0128448	0	0.0244881	0.109114	0
Gm38169	0.000258145	0	0.000358827	0	0	0	0	0	0	0.00189743	0	0	0	0	0	0	0
Gm38331	0.000724888	0	0	0	0	0.000945662	0	0	0	0	0	0	0	0	0	0	0
Coq8a	0.0255796	0.0273488	0.0281251	0.0219342	0.0251869	0.0287696	0.0081011	0.012853	0	0.0434966	0	0.0170803	0.0023079	0	0.0110204	0.0443003	0
Gm37336	0.000496703	0.000703316	0	0	0	0	0	0.00112748	0	0	0	0	0	0	0	0.00544388	0
Psen2	0.279766	0.418292	0.333764	0.374382	0.338166	0.329472	0.435499	0.230099	0.415571	0.458137	0.585628	0.478147	0.391933	0.530201	0.274641	0.569424	0.511586
Gm5069	0.00520412	0.00469021	0.0093118	0.0100017	0.00445126	0.00361849	0.0112154	0.00818871	0.0288045	0.00451659	0.0387581	0.0153078	0.0158327	0.062058	0.00643088	0.0144347	0
Itpkb	0.26817	0.319051	0.254044	0.304346	0.262944	0.253214	0.379073	0.283789	0.696126	0.228276	0.739137	0.366045	0.441296	0.698029	0.304763	0.49738	0.588201
Gm37033	0.00617894	0.00539219	0.00534085	0.0119081	0.0147746	0.00735333	0.00733834	0.00487663	0.0284786	0.015538	0.0562359	0.00461675	0.00167892	0.0318551	0.00909071	0.0133461	0
Gm37390	0.00166171	0.00394585	0.00196719	0.00309561	0.0122576	0.00120703	0.00316973	0.000507457	0.00751707	0.000786346	0.0178318	0.00154452	0.00658863	0.0133291	0.00317859	0.00532556	0
Gm36933	0.00106184	0.00197352	0.0022816	0.00178271	0.00384279	0.000541905	0.00383063	0.00302963	0.00565619	0.000670125	0.0284696	0	0.00502335	0	0.0014747	0	0
Stum	0.00942976	0.0126928	0.00506509	0.00906121	0.0131835	0.00747173	0.0137468	0.0140386	0.0256299	0.0029701	0	0.0162601	0.00129201	0	0.0108012	0.00378128	0
Parp1	0.627993	0.602056	0.664808	0.596127	0.599218	0.784911	0.287378	0.363645	0.0692963	0.664959	0.0943892	0.379273	0.209235	0.0427179	0.507183	0.909625	0.66037
Lin9	0.250488	0.120543	0.121208	0.162708	0.202765	0.192368	0.126384	0.333188	0.0275884	0.155616	0.0125744	0.0706796	0.350914	0.0533371	0.268456	0.177572	0.164882
Mixl1	0.000260856	0	0	0	0	0.000349263	0	0.00140685	0	0	0	0	0	0	0	0	0
Gm8101	0.00285096	0.00528386	0.00538044	0.00499296	0.0154717	0.00445893	0.000779526	0	0	0.0043918	0.0116156	0	0.0126197	0.00391054	0.00349946	0.00299273	0
Acbd3	0.624221	0.653575	0.66131	0.631618	0.609379	0.56302	0.674937	0.64513	0.669677	0.615802	0.949875	0.725061	0.429291	0.641269	0.635752	0.536066	0.675395
Gm37768	0.0249106	0.0301906	0.0436797	0.0280707	0.00696711	0.0267648	0.0278075	0.0232741	0.0266299	0.0461386	0.0526415	0.0303778	0.0402888	0.0529787	0.0259141	0.0206795	0.127
Gm38293	0.000827174	0.00175336	0.000241671	0.00121675	0.00731797	0.000375555	0.00684026	0.000557609	0	0	0	0.00514203	0.00418921	0	0.00248298	0	0
H3f3a	0.25953	0.292982	0.232406	0.238287	0.339066	0.242176	0.398375	0.351027	0.739729	0.373491	0.893361	0.365422	0.469679	0.557802	0.248031	0.358892	0.670134
Gm17275	0.0647354	0.0617401	0.0607466	0.0637739	0.0926031	0.0730222	0.0964144	0.0688397	0.216631	0.101291	0.289159	0.0644036	0.168519	0.126398	0.0485554	0.118712	0.0896663
H3f3aos	0.00251972	0.00445139	0.00293052	0.00228391	0	0.00243735	0.00832698	0.00100923	0.0289841	0.00134043	0.0117436	0.00611433	0.00843151	0.0175863	0.0046061	0.0163488	0
Gm24836	0	0.000391988	0	0	0	0	0.00219934	0	0	0	0	0	0	0	0	0	0
Sde2	0.359283	0.397445	0.406515	0.371127	0.434161	0.369669	0.430911	0.370237	0.835048	0.402509	0.899928	0.370203	0.507401	0.603457	0.351829	0.434203	0.511518
Gm20305	0.000535493	0.00211213	0.000233036	0.00243527	0	0.000798356	0.000831061	0.000898332	0.00533701	0.00123905	0.0748198	0.00568961	0.000696715	0.00467943	0	0.00133017	0
Gm18036	0	0	0.000366604	0.000945899	0	0	0.00212372	0.000978553	0	0	0	0	0	0	0.000999494	0	0
Pycr2	0.498708	0.507568	0.561468	0.490001	0.496157	0.537263	0.30662	0.364292	0.0996189	0.457387	0.0664193	0.418025	0.391027	0.290239	0.468634	0.461376	0.322614
Lefty1	0.0172509	0.0260898	0.0317877	0.015368	0.0290773	0.0136355	0.0662842	0.00893795	0.0275251	0.0212803	0	0.0456661	0.00973407	0.0358933	0.0113962	0.0237489	0
Tmem63a	0.338696	0.418672	0.329585	0.404388	0.493234	0.336999	0.742868	0.476108	0.652632	0.487735	0.410316	0.597866	0.863273	0.965496	0.392848	0.254288	0.33665
2210411M09Rik	0	0	0.000630756	0	0	0	0	0	0	0	0	0.00363877	0	0	0	0	0
Ephx1	0.00294832	0.0057586	0.00185756	0.000945082	0.00802694	0.00531897	0	0.00118703	0.00488361	0.0374382	0	0.0149038	0.00250868	0	0.0256869	0.055107	0.0657529
Nvl	0.371669	0.308543	0.351268	0.325309	0.441045	0.332373	0.245108	0.297805	0.101592	0.295918	0.129368	0.240878	0.252717	0.211928	0.340021	0.369094	0.362599
Cnih4	0.611838	0.527875	0.579742	0.517367	0.561181	0.624579	0.488335	0.548273	0.717695	0.672372	0.768123	0.478207	0.672682	0.754294	0.709028	0.60128	0.661817
Wdr26	0.908515	1.03699	1.06998	1.01058	0.953218	0.836055	1.40435	0.990001	2.28875	1.52994	2.1618	1.29071	1.37608	2.09845	1.04895	1.50647	2.00288
A430110L20Rik	0.00114985	0.000329044	0.000538441	0.000794223	0.00667792	0.000992081	0.00108378	0.00218247	0	0.00451417	0	0	0	0	0.00129154	0.00454209	0
Rpl35a-ps2	0.0139654	0.0151791	0.0142004	0.0206051	0.0155584	0.0124089	0.0117971	0.0126356	0.00850154	0.0182801	0.0179693	0.0130559	0.0155295	0.0130728	0.00881287	0.0206748	0
Gm8146	0.0153775	0.00636004	0.00833522	0.0109818	0.0135564	0.0155204	0.00704332	0.015898	0	0.00648348	0	0.00292544	0.01535	0.0138375	0.0151046	0.0197292	0
Dnah14	0.00309848	0.0032219	0.00244599	0.00170836	0.0133843	0.00424179	0.00705411	0.00284805	0.0359375	0.0110235	0.073188	0.0101866	0.00854843	0.029825	0.00550667	0.00835067	0
Lbr	0.88072	0.820197	0.753533	0.827243	0.737027	0.758533	1.03705	1.14377	1.90438	0.807795	1.79052	0.861912	1.21827	1.21476	1.01267	0.836122	0.634076
Gm26004	0	0	0	0	0	0	0	0.000415259	0.00726606	0	0	0	0	0.00368249	0	0	0
Gm5533	0.00118154	0.00214719	0.00112907	0.00101829	0	0.000868865	0.000667324	0	0.0156699	0	0.0249462	0.00103664	0	0.0209337	0.00104406	0	0
Enah	0.0434365	0.0679068	0.0632338	0.0688582	0.0478887	0.0702808	0.0399976	0.0176712	0.0338681	0.0424162	0.163274	0.0750661	0.0176286	0.0279688	0.0246623	0.0254313	0
Gm37258	0.00124341	0.0033599	0.00322054	0.00186425	0.000974733	0.00146976	0.000517882	0.000442532	0	0	0	0.000495638	0	0	0.00128507	0	0
Srp9	0.417342	0.376124	0.428536	0.355823	0.332677	0.352485	0.324952	0.314242	0.194339	0.377973	0.195645	0.37715	0.39808	0.332915	0.378786	0.416238	0.134146
Degs1	0.901381	1.27537	1.03945	0.926724	1.0549	0.97579	1.60328	1.02965	2.14795	1.61909	1.48377	1.65317	1.35145	1.98379	1.2651	0.664194	1.59571
1700047M11Rik	0.00261559	0.00630568	0.00358347	0.00430948	0.0221436	0.00379309	0.576234	0.0202172	1.7948	0.0232606	0.711345	0.0941258	0.702151	1.68371	0.00360676	0.031633	0.250318
Fbxo28	0.369115	0.358108	0.358743	0.282106	0.328001	0.2993	0.430263	0.367448	0.624616	0.492277	0.456284	0.438859	0.455296	0.635522	0.432899	0.59081	0.506607
Gm10517	0.000230728	0	0	0.000415696	0	0	0	0	0	0	0	0.000961154	0	0	0	0	0
Trp53bp2	0.0391947	0.049618	0.0431378	0.0282273	0.0489862	0.0418552	0.0584559	0.0397284	0.299127	0.121249	0.289659	0.0533984	0.0734936	0.241984	0.0541685	0.168606	0.0963561
Capn2	0.0383699	0.133627	0.050671	0.0166237	0.164691	0.0692534	0.0185669	0.0245599	0.0110445	0.889675	0.0264671	0.540412	0.0211581	0	0.368047	0.476676	0.77069
Gm37069	0	0	0	0	0.00935156	0	0	0	0	0.00246903	0	0.00133651	0	0	0.00183466	0	0
Susd4	0.43324	0.461152	0.458017	0.482134	0.520851	0.309258	0.534504	0.373686	0.0169588	0.260139	0.0253531	0.474616	0.0421395	0.00441659	0.384988	0	0.0999021
Gm37542	0	0.000437256	0.000465001	0	0	0	0	0	0	0.000809935	0	0	0	0	0	0	0
Tlr5	0.000281331	0.00166873	0.000326128	0	0.0118522	0.00200539	0.0144713	0	0.305249	0.0226607	0.318861	0.0100358	0.00565816	0.0425792	0.00113421	0	0
Gm38079	0.000153979	0.000249148	0.0004165	0	0	0	0	0	0.00736769	0.00216201	0.0479	0	0	0.00436069	0.00118299	0	0
Disp1	0.0955112	0.103508	0.0814015	0.0632392	0.103114	0.0683131	0.0983567	0.0772819	0.0322178	0.115397	0.130377	0.091909	0.0345781	0.0382435	0.160683	0.172455	0.0739027
BC085271	0.00396575	0.00619048	0.00592055	0.00615588	0	0.00523884	0.00187906	0.00555663	0	0.00863624	0	0.00521274	0.00391956	0	0.00293153	0.00489684	0
Brox	0.321663	0.316061	0.315817	0.281021	0.34035	0.273434	0.306401	0.335631	0.196247	0.377405	0.225724	0.361427	0.222979	0.229957	0.363708	0.25602	0.325286
Aida	0.438504	0.439744	0.395514	0.410802	0.445143	0.494317	0.367551	0.453481	0.144125	0.540293	0.130105	0.404643	0.348991	0.21855	0.565586	0.611436	0.535105
Mia3	0.750195	0.734745	0.791152	0.746773	0.721912	0.685451	0.818665	0.676759	1.07377	0.795842	1.10302	0.741389	0.77637	0.889723	0.759572	0.949502	1.17576
Gm37339	0.0022672	0.00113013	0.000656862	0.00109513	0	0.00143858	0	0	0	0.00138109	0	0.00555818	0	0	0.00192923	0	0
Taf1a	0.090636	0.077553	0.0904575	0.0762117	0.0687418	0.0820635	0.0417522	0.0735291	0.00182963	0.0807265	0.0455064	0.0608212	0.0273754	0.0332698	0.0722563	0.151092	0.181345
Gm37986	0.00290692	0.00187944	0.00704237	0.00355842	0.00688855	0.00095993	0.00202805	0.000936735	0.00768281	0.00324222	0	0.00150679	0.0333386	0	0.00396719	0.00522082	0
Hhipl2	0.000183845	0	0.00269948	0	0	0	0	0	0	0.000413399	0	0	0	0	0	0	0
Gm37214	0.000155869	0	0.000497271	0	0	0	0	0.000877971	0	0	0	0	0	0	0	0.0035068	0
Gm33973	0.0109997	0.0133359	0.0170332	0.0122142	0.0148619	0.0100755	0.00612176	0.0075784	0.00630142	0.0280578	0	0.0215397	0.000961304	0	0.00836038	0	0
Gm34068	0.00059882	0	0	0.000727379	0.0053264	0	0	0	0	0.000451654	0	0	0	0	0	0	0
Dusp10	0.0364167	0.0282741	0.0345092	0.0284389	0.0380371	0.0397184	0.0160381	0.0299382	0	0.110011	0	0.0377692	0.0283694	0.0069396	0.0549471	0.0675936	0.0966742
1700056E22Rik	0.00797871	0.0112574	0.00494834	0.00808837	0.00651586	0.0115682	0.00152961	0.00665899	0	0.00888824	0	0.0053381	0.00493857	0	0.0142938	0.0312317	0
1700112H15Rik	0	0	0	0	0	0	0.00173059	0	0	0	0	0.002645	0.00620431	0.00946117	0	0	0
Gm37800	0.000135022	0.00185256	0.000416343	0	0	0	0.00760818	0.00173596	0.00501608	0.00212229	0.0747171	0.00584201	0.00564969	0.0226495	0.00127024	0	0
Hlx	0.193605	0.253358	0.228034	0.230685	0.269679	0.167039	0.496685	0.293972	0.584075	0.259188	1.08488	0.318323	0.651991	0.927306	0.22522	0.0760654	0.120508
Gm34342	0.00738993	0.0134404	0.00822585	0.0121287	0	0.00459335	0.0343948	0.0103036	0.0288481	0.00427799	0.0375643	0.00762852	0.0172183	0.0548492	0.00724847	0.00885574	0
2025-03-01	0.00278572	0.0018768	0.00427364	0.00169379	0	0.00217146	0	0.00195571	0	0.00414807	0	0.000518457	0	0	0.00148864	0	0
2025-03-02	0.482679	0.44165	0.580226	0.462177	0.501691	0.468081	0.326106	0.359721	0.0735079	0.484528	0.122327	0.316517	0.36302	0.124542	0.369025	0.614905	0.306375
C130074G19Rik	0.0333183	0.0332864	0.0467219	0.0486766	0.0316454	0.0904231	0.00962972	0.0143761	0	0.00557613	0	0.0111343	0	0	0.0212125	0.00122433	0
Mark1	0.0054104	0.00440069	0.00370403	0.00519212	0	0.00883246	0.00360166	0.00604595	0.00724832	0	0	0.00151745	0	0	0.00455088	0	0
Rab3gap2	0.400808	0.39679	0.401663	0.387857	0.410168	0.413825	0.387279	0.354203	0.205345	0.284902	0.20049	0.394553	0.200178	0.182682	0.36548	0.291061	0.163768
Snora36b	0.000229076	0.000427295	0	0.000325966	0	0.000343141	0	0.000798732	0	0	0	0	0	0	0	0	0
Gm34882	0.000662922	0.0013995	0.000542883	0.000281735	0	0.000541468	0	0.000984572	0	0	0	0.00114459	0	0	0	0.001305	0
Iars2	0.29623	0.295015	0.304225	0.287691	0.322291	0.300011	0.240389	0.236403	0.0557466	0.258576	0.0319472	0.252321	0.14673	0.1662	0.272693	0.320357	0.429003
Gm37785	0.0011567	0.004058	0.00336835	0.00485808	0.00438342	0.00143081	0.00119096	0.00102848	0	0	0	0.000995204	0	0	0.0034066	0	0
Bpnt1	0.064551	0.0761841	0.0829542	0.0735539	0.0763922	0.0896169	0.0189102	0.0393591	0.0295838	0.142108	0.0337392	0.0585141	0.0322749	0.0100184	0.0439359	0.183318	0.154104
4930532G15Rik	0.00501389	0.00336868	0.00314937	0.00389639	0	0.00466765	0.00834131	0.000516376	0	0.000427676	0	0.00218599	0.00939715	0	0.00218526	0.00828434	0
Eprs	1.60065	1.44774	1.53301	1.50055	1.38608	1.53632	1.00033	1.41899	0.0872572	1.05416	0.11764	1.17852	0.685099	0.246935	1.51911	1.30629	0.679447
9630028B13Rik	0.000671534	0.000709585	0	0.00036724	0	0.000591164	0.000408145	0.000696527	0	0	0	0	0	0	0	0	0
Gm9722	0.0014081	0.00127067	0.00134212	0.00113679	0	0.000432476	0.000608682	0.000261354	0.00721695	0.00188828	0	0.00251203	0	0	0.000878751	0.00327414	0.0529818
Lyplal1	0.130767	0.136961	0.0997205	0.109981	0.12675	0.142462	0.0539257	0.0893891	0.00855361	0.131323	0	0.125219	0.0291547	0.00536578	0.11945	0.0877846	0.0876224
Tgfb2	0.000536919	0.00104674	0.000269225	0.000206712	0	0.00028027	0	0.000508937	0	0.00395249	0	0	0	0	0	0.0202545	0.0361843
Rrp15	0.527278	0.449025	0.550862	0.527905	0.453987	0.581127	0.252511	0.368337	0.0281745	0.284933	0.0156538	0.198403	0.10775	0.0153533	0.344081	0.303522	0
A430105J06Rik	0.00880767	0.00799538	0.0114374	0.0134087	0.00809041	0.00585071	0.040073	0.00911815	0.0175117	0.00155618	0.0139053	0.0218816	0.04141	0.0390401	0.00737412	0.00681295	0
Gm3809	0.0101885	0.0133377	0.00934658	0.0136632	0.0122883	0.0123331	0.0175615	0.0161943	0.0380879	0.00960418	0.0475275	0.00980578	0.0221349	0.0342198	0.00955796	0	0.0332514
D1Pas1	0.000145258	0	0	0.000648451	0	0	0	0	0	0	0	0	0.00118095	0	0	0	0
Spata17	0	0	0.00066142	0.000692152	0	0	0	0.000652388	0	0	0	0	0	0	0	0	0
Gpatch2	0.147989	0.162921	0.163168	0.15777	0.12471	0.153117	0.143091	0.140561	0.0811161	0.185919	0.0473631	0.145129	0.143174	0.135349	0.134709	0.20823	0.197396
Gm37254	0.068906	0.0877991	0.0792805	0.0863076	0.0650215	0.0653898	0.0857632	0.0567039	0.0762977	0.084367	0.0654571	0.0614806	0.130851	0.014739	0.0605814	0.0661435	0.220984
Gm38155	0.00139612	0.00126639	0.00388197	0.00186224	0	0.00109793	0	0.00066991	0	0	0	0.000388111	0.000571449	0	0	0	0
Esrrg	0.000823816	0	0.000303603	0	0	0	0	0	0	0	0	0	0	0	0.00233101	0	0
Kctd3	0.152444	0.147857	0.181776	0.162991	0.148344	0.151175	0.125613	0.148028	0.0316699	0.146697	0.014392	0.125775	0.0917959	0.100368	0.143535	0.154726	0.0806848
Pdcd5-ps	0.214324	0.223154	0.231798	0.235718	0.21655	0.248028	0.180719	0.190195	0.175107	0.205315	0.0758233	0.142938	0.276481	0.190738	0.213344	0.272177	0.150098
Gm38122	0.000348631	0	0	0	0	0	0	0.000750588	0	0	0	0	0	0	0.00100285	0	0
Cenpf	1.42062	0.26486	0.736709	0.36734	0.9894	0.353193	0.173496	1.55147	0.063623	0.735747	0.0432203	0.0933379	1.47403	0.182944	1.61109	1.08127	0.0879536
Ptpn14	0.004774	0.00101955	0.000866727	0.00445217	0.0104645	0.00332441	0.010457	0.0052637	0	0.00120245	0	0	0	0	0.00390524	0.0403052	0.0404228
Gm37422	0.00189803	0.00242942	0.00173873	0.00238181	0.0014681	0.0048732	0.00227903	0.00233993	0	0.00189829	0	0	0	0	0.00143869	0	0
Smyd2	0.0403907	0.0452456	0.0484517	0.0478035	0.0457464	0.0456468	0.0273817	0.0238045	0	0.0147684	0	0.0314063	0.00620097	0.00344193	0.0325243	0.0511044	0
Gm38245	0.000293918	0.00112711	0.000819945	0	0	0	0	0	0	0	0	0	0	0	0	0	0
Prox1	0.0117821	0.0133828	0.00849323	0.0250228	0.00506523	0.00993077	0.0421121	0.0318188	0	0.000607314	0	0.00673706	0.00450045	0	0.00950294	0	0
Rps6kc1	0.140546	0.114973	0.10041	0.0905236	0.167069	0.105202	0.181855	0.116733	0.309419	0.187675	0.213928	0.117875	0.458648	0.715144	0.13986	0.134876	0.203751
Angel2	0.475106	0.431547	0.39269	0.421459	0.433777	0.42287	0.374355	0.470678	0.567067	0.427955	0.676014	0.442428	0.549001	0.591553	0.48206	0.617483	0.532437
Vash2	0.000289438	0.00018545	0.000280945	0	0	0.000337355	0	0	0	0.00361866	0.0210162	0.00150599	0.00357441	0	0.00133648	0.00877026	0
Gm37095	0.000179258	0.000548411	0	0	0	0	0.00218971	0	0	0	0	0	0	0	0	0	0
Gm8407	0.000344836	0.000736129	0	0.000422777	0.00140487	0.000366582	0.00208653	0	0	0	0	0	0.00732018	0	0	0.0017317	0
Flvcr1	0.179172	0.195939	0.199869	0.167116	0.203536	0.194858	0.107107	0.0951403	0.557711	0.263053	0.515902	0.17686	0.314239	0.506014	0.163348	0.198105	0.370851
A230020J21Rik	0.00131831	0.00046985	0.00029125	0	0	0	0	0	0	0	0	0.00170587	0	0	0.000753461	0	0
Spata45	0.000147098	0.000278274	0	0	0	0	0	0.000499792	0	0	0	0	0	0	0	0	0
Tatdn3	0.0458526	0.0367186	0.0247866	0.0250426	0.0331044	0.0381069	0.0268084	0.0193521	0.0571752	0.0447584	0.0138145	0.0440114	0.0700018	0.0862374	0.0299936	0.0456118	0.0898225
Nsl1	0.383558	0.115599	0.0896662	0.158319	0.300601	0.309234	0.0788375	0.428532	0.0326334	0.184019	0.0263935	0.0487071	0.441249	0.0159766	0.433908	0.205845	0.10923
Gm38188	0.00152823	0.00033564	0	0.00165725	0	0.0020294	0	0.00834008	0	0.000508488	0	0	0.0028178	0	0.000605114	0	0.039993
Batf3	0.000129863	0.000373946	0.000208374	0.000238706	0	0.00106861	0	0	0.0115669	0.0465003	0.0193113	0	0	0	0	0.0422213	0.0391319
Fam71a	0	0	0	0	0	0	0	0	0	0.00516151	0	0	0	0	0	0	0.112201
Atf3	0.0129594	0.0295492	0.0218957	0.00494248	0.128015	0.0109955	0.00225387	0.00216434	0.0451781	0.694192	0.584717	0.13171	0.0168128	0.0175016	0.0504488	0.0879004	0.909496
D730003I15Rik	0.0236388	0.0422653	0.0263549	0.0240656	0.0496794	0.0185161	0.030393	0.0152981	0.122204	0.0299938	0.170391	0.0690907	0.014282	0.0773129	0.0347463	0.0374474	0.24426
Gm37168	0	0.000597062	0.000376166	0	0	0	0	0	0	0	0.0345952	0.000970784	0	0	0.00104911	0.00454354	0
Nenf	0.0384509	0.0470587	0.0438138	0.0247386	0.0579231	0.0523023	0.00292963	0.012707	0.00863504	0.0886242	0.015373	0.0437613	0.00922915	0.0145337	0.0465354	0.130831	0
Tmem206	0.0325925	0.0254743	0.0322566	0.0165952	0.0326113	0.0338499	0.00716155	0.0155162	0	0.0501346	0.0236434	0.0169674	0.014725	0.0164476	0.0274896	0.110575	0.0675362
Ppp2r5a	0.900819	0.963418	0.937905	0.98327	0.956676	0.814562	1.55214	1.09783	2.14596	1.31673	1.88941	1.24205	1.66353	2.13446	1.05238	1.21172	1.59464
Gm2272	0.0011596	0.00145297	0.000587713	0.00121765	0.0112038	0.000548561	0.00462473	0.00344804	0.00326437	0.00230852	0	0	0.0112343	0	0.00143869	0	0
Gm32200	0	0.000328029	0	0.000880958	0	0.000500146	0	0	0	0	0	0	0	0	0	0	0
9430037O13Rik	0.0215338	0.0267354	0.0220344	0.0339375	0.0501503	0.0561321	0.0186074	0.0228015	0	0.0146412	0	0.00629992	0.0334475	0	0.0117538	0.0114772	0
Dtl	0.407595	0.537636	0.441179	0.615005	0.655812	0.82998	0.449296	0.438535	0.0307371	0.325232	0.0228115	0.235303	0.563559	0.0440559	0.394814	0.391992	0
Ints7	0.442202	0.477168	0.459605	0.525052	0.551293	0.572814	0.338934	0.397733	0.0635896	0.35896	0.0409731	0.276765	0.38176	0.0947897	0.378194	0.477666	0.150163
Gm37349	0.012066	0.0195633	0.0174737	0.0157118	0.0422306	0.0178612	0.0118918	0.0115304	0.00346425	0.0132259	0	0.00770308	0.00861679	0	0.0165859	0.0248387	0
Lpgat1	0.726939	0.699973	0.746547	0.835083	0.58398	0.649859	1.25742	0.933786	1.10008	0.638425	0.585479	0.599702	1.18794	1.50435	0.606422	0.517885	0.524068
Gm26203	0.000356228	0.000347435	0	0	0	0	0.00254543	0	0	0	0	0	0	0	0	0	0
Gm38037	0.0236296	0.00251543	0.00622287	0.00269848	0.0248522	0.0132313	0.00338923	0.0221694	0.00790176	0.0182076	0.011494	0.000764797	0.0226873	0	0.0249107	0.0305895	0
Nek2	0.559839	0.0599582	0.129238	0.103201	0.371171	0.234278	0.0395964	0.513314	0.0157265	0.262302	0.0268802	0.0154577	0.354613	0.0350432	0.591561	0.290861	0
1700034H15Rik	0.00121425	0.00146251	0.000483504	0.000523692	0	0	0.00174859	0	0	0.00626409	0	0	0.000872923	0	0	0.00243682	0
Slc30a1	0.0687027	0.0525845	0.0654494	0.0584318	0.0578554	0.0429963	0.140147	0.0682281	0.412673	0.240491	0.332299	0.0672704	0.0848642	0.21658	0.0493338	0.124057	0.255231
Rd3	0	0	0	0	0	0	0	0	0.0517829	0.00134192	0.0112614	0	0	0.0751	0	0	0
Gm26670	0.00116872	0.000849924	0.00244226	0.00307968	0.0034469	0	0	0.000909565	0.010998	0.0016225	0.0128476	0	0.00872928	0.0152698	0.00285018	0.0111498	0.0608427
Gm32460	0.000934025	0.000507469	0.000342404	0	0.000673159	0.000654985	0	0.00140325	0	0	0	0	0	0	0.000907941	0.00211095	0
Traf5	0.00551152	0.00293012	0.00995225	0.00566299	0.0208355	0.00662245	0.00570744	0.00583556	0.167546	0.108449	0.216325	0.00368925	0.0385054	0.0982749	0.00370161	0.11353	0.105278
Gstp-ps	0.104237	0.127915	0.129989	0.112364	0.116615	0.123944	0.136595	0.0844981	0.0572315	0.161102	0.126139	0.136603	0.0754322	0.0448482	0.10165	0.226028	0.110924
Gm26879	7.65e-05	0	0	0.000224818	0	0.000483643	0	0	0	0	0	0	0	0	0	0	0
Rcor3	0.197018	0.239251	0.194475	0.203365	0.273769	0.188165	0.258668	0.239406	0.13287	0.223903	0.100069	0.216321	0.29146	0.180198	0.228946	0.275945	0.0936253
Gm10516	0	0.000639575	0.00116875	0.00205576	0	0.000569332	0	0.000336858	0	0	0	0.00174495	0.00174751	0	0	0	0
Hhat	0.0049883	0.00661936	0.00560044	0.00540525	0.005626	0.00390503	0.00139185	0.00236585	0	0.00988453	0	0.00495545	0.000824333	0	0.00134318	0.0675714	0
Gm22265	0.0184127	0.00848824	0.0130382	0.0126184	0.0340784	0.0122779	0.0040443	0.00937264	0	0.005415	0	0.00444975	0	0	0.0203834	0.0253042	0
Gm2367	0.00552719	0.00463536	0.00861731	0.00771259	0.00801955	0.00570799	0.00319831	0.00307223	0	0.00384594	0	0.00402507	0.0114002	0	0.00486434	0.0262622	0
Diexf	0.234093	0.183278	0.22034	0.21697	0.240414	0.220812	0.116193	0.152546	0	0.155604	0.00948096	0.115861	0.0570983	0.0227137	0.174358	0.26388	0.201268
Irf6	0.00103858	0.00395184	0.00260696	0.00305271	0	0.000768726	0.00566526	0.00300941	0	0.00134486	0	0.00591527	0	0	0.00423465	0.0324627	0
A130010J15Rik	0.173607	0.179358	0.156542	0.210101	0.113564	0.168452	0.125516	0.15599	0.0263666	0.149849	0.0360656	0.140244	0.0696522	0.0777181	0.178899	0.211628	0.127837
Traf3ip3	0.0926546	0.213594	0.143284	0.137801	0.121927	0.127818	0.259983	0.108832	0.739138	0.342775	0.625627	0.331517	0.497716	0.777004	0.140386	0.481577	0.681796
Gm15872	0	0.000582531	0.000906188	0	0	0	0	0	0	0.000473903	0.0311138	0	0	0.00560132	0	0	0
4930570N18Rik	0.0321617	0.0703877	0.0414527	0.0577501	0.0336414	0.0449112	0.0441074	0.0336181	0.0122892	0.0267579	0.00541474	0.0553757	0.0140074	0.0486821	0.0426421	0.046756	0
Lamb3	0.0313115	0.0523575	0.03162	0.0466325	0.0323159	0.0261129	0.0568204	0.0433604	0.130661	0.0133026	0.253435	0.0432339	0.0337166	0.0936821	0.0378044	0.0248775	0
Hsd11b1	0.314346	0.462904	0.209365	0.585581	0.326257	0.457824	1.08903	0.692472	1.47363	0.292684	0.814101	0.614443	1.2717	1.36188	0.379126	0.315949	0.725357
Gm38118	0.000605736	0.00613689	0.00140395	0.00222433	0.00775142	0.0012947	0.149003	0.0153913	0.147306	0.00288685	0.128138	0.0188325	0.0103274	0.0719393	0.00536427	0	0
G0s2	0.04731	0.103482	0.033309	0.0905706	0.0452795	0.0376383	0.396579	0.187616	1.39635	0.0330659	1.2223	0.268798	0.458857	0.890812	0.124256	0.0191311	0.0712604
Gm37691	0.0221666	0.0399994	0.0219226	0.0408159	0.0135994	0.0308402	0.231999	0.0627704	0.56141	0.0166116	0.715367	0.107893	0.158968	0.31853	0.0407161	0.0372822	0.043109
Camk1g	0.000133955	0	0	0	0	0	0	0	0	0	0	0	0.00281545	0	0	0.0143186	0
Plxna2	0	0	0	0.000154297	0.00126408	0	0	0	0	0.00127051	0	0	0.00298994	0	0	0.0163042	0
Gm19777	0	0.000439452	0.000363823	0	0	0.000742005	0	0.0021458	0	0	0	0	0	0	0	0	0
Cd34	0.00392515	0.00423091	0.0165352	0.00236608	0.0441774	0.00498457	0	0	0.0390681	0.0781233	0.0753727	0.000780048	0.0377374	0.0246918	0	1.27917	0
Gm16897	0	0	0	0	0	0	0	0	0	0	0.0593417	0	0	0	0	0.0119341	0
A330023F24Rik	0.00157913	0.000855231	0.000525023	0.000315978	0.00110631	0	0.00223575	0.00116272	0.0554182	0.00336582	0.0741874	0.00139249	0	0.0122553	0	0.0162771	0
Gm32250	0.000282169	0.000326609	0.000384021	0	0	0	0	0.000631004	0.0213503	0	0	0	0	0.00625109	0	0	0
Gm37334	0.000118859	0.000983671	0.000823564	0.00104907	0	0.00189375	0.000938131	0.00452331	0.0272302	0	0.0392322	0	0	0	0	0.00416253	0
9630010A21Rik	0.000713285	0.00217619	0.000297689	0.000564252	0.00139778	0.00143631	0	0.00294935	0.0447401	0.00457617	0.0650226	0.00541363	0.00203359	0.0199235	0	0.006009	0
Cd46	0.00360874	0.00621647	0.00853558	0.00730266	0	0.00299011	0.027587	0.0038191	0.0651779	0.00678452	0.22186	0.0118123	0.00986349	0.0408654	0.00165097	0.0348491	0.0955686
Gm37366	0.0014019	0.000404331	0.00146824	0.000535901	0	0.000756837	0	0.000454081	0.00851456	0.0025046	0.0295764	0.00118161	0.00201092	0.0134417	0.00104588	0	0
Gm37132	0.000610977	0.000492001	0.00154816	0.000947776	0	0.000989017	0.00434064	0.00134682	0.00568261	0.00390853	0.023304	0	0.00155102	0	0	0	0
Cr1l	0.600296	0.608663	0.635657	0.57444	0.595719	0.545514	0.634337	0.615325	1.24036	0.687074	1.35312	0.643616	0.570674	0.893771	0.61131	0.706643	0.752164
Cr2	0.00480025	0.00270632	0.0021653	0.00391719	0.000741751	0.00116725	0.00624425	0.00432379	0	0.000629741	0.0274796	0.00306037	0.0117689	0	0.00451566	0.0244007	0
Gm38194	0.00970259	0.0107196	0.0094978	0.0169458	0	0.00850411	0.0244425	0.00756885	0	0.000700578	0.0108014	0.0128197	0	0	0.0035207	0	0
Fam171a1	0	0	0.000936589	0	0	0	0	0	0	0	0	0	0.00264168	0.00559664	0	0.0927969	0
Nmt2	0.244983	0.262225	0.24319	0.258951	0.248345	0.308318	0.219144	0.260204	0.0383041	0.272229	0.0561816	0.216159	0.1257	0.00413281	0.293463	0.366118	0.0941073
Gm22005	0.000600637	0.00143953	0	0.000830141	0	0.00030151	0.000935967	0.000868242	0	0	0	0	0	0	0.000964182	0	0
Rpp38	0.0828982	0.110918	0.0825419	0.102662	0.0572105	0.0827144	0.0559977	0.0601792	0	0.0481919	0.0106278	0.0654914	0.0174294	0	0.0740566	0.0673797	0
Acbd7	0.000192548	0	0.000208374	0.00132949	0	0.000158951	0	0	0	0	0.00722262	0	0	0	0.000999093	0	0
Meig1	0.00011024	0.00188686	0.000725658	0	0	0.000408155	0.00204253	0	0	0	0.0262313	0.0035272	0	0	0.00102388	0	0
Dclre1c	0.0972818	0.10519	0.097155	0.0970278	0.148991	0.0725462	0.108076	0.120754	0.194864	0.171576	0.581845	0.167205	0.133502	0.143794	0.133941	0.15747	0.304132
Suv39h2	0.107651	0.0461946	0.0606791	0.068303	0.107457	0.110322	0.0336131	0.0871307	0	0.062747	0.0098499	0.0222067	0.100746	0.00145673	0.10305	0.0830499	0.144602
Gm13184	0.000445176	0.000718005	0.0008422	0.00128745	0	0.000677359	0.00272975	0.000851422	0	0	0	0	0.0018663	0	0	0	0
Hspa14	0.895321	0.811271	0.844256	0.884258	0.868753	0.984028	0.757076	0.975974	0.322997	0.686565	0.275092	0.665957	0.852898	0.484319	0.924328	0.699577	0.569767
Gm45902	0.0628432	0.0594132	0.0575667	0.0713671	0.0704176	0.0693689	0.0598334	0.0709565	0.0130556	0.0450427	0.0347132	0.0501695	0.0781554	0.0619336	0.066068	0.0913893	0
Cdnf	0.00912504	0.00738883	0.00894157	0.00666818	0	0.00558155	0.0300899	0.0077638	0.00790672	0.0105407	0	0.00527301	0.00217755	0.0045073	0.00695149	0.0239394	0.109316
Gm13186	0.00400546	0.00282093	0.00589737	0.00480583	0.00606572	0.00714707	0.000833847	0.00160052	0	0.00121935	0.01094	0.0043639	0.00423958	0	0.00239128	0.00199721	0
Gm13182	0.00136979	0.000492532	0.00316537	0.0023791	0	0.0037109	0	0.00114794	0	0.00165799	0	0	0	0	0.000842625	0.00375742	0
Fam107b	1.56554	1.85048	1.62184	1.87674	1.53216	1.62209	2.08663	1.86543	2.16827	1.37265	1.78838	1.84728	1.86278	1.85943	1.61294	1.60451	1.39314
Gm13181	0.106183	0.0914861	0.116109	0.089213	0.0699616	0.0961392	0.0707979	0.0773533	0.0157026	0.115473	0.0379469	0.0809171	0.0743999	0.0475342	0.104197	0.115344	0.0423673
Gm13185	0.000518748	0.000877283	0	0.000548631	0	0.000428057	0	0.000874849	0	0	0	0	0	0	0	0.00243682	0
Frmd4a	0.236329	0.198906	0.281708	0.223046	0.278208	0.257356	0.0701254	0.118739	0.00601544	0.165129	0.00928852	0.0796322	0.0787457	0.0211121	0.152289	0.360487	0.138869
Prpf18	0.37804	0.346591	0.313467	0.360283	0.315754	0.303732	0.438669	0.443511	0.64273	0.409106	0.717877	0.41307	0.352703	0.558901	0.434318	0.435642	0.690216
Gm13196	0.072045	0.0865787	0.0741844	0.0869389	0.0462687	0.0725782	0.0585267	0.0642998	0.00958732	0.084738	0	0.0794659	0.0343241	0.0103186	0.0649979	0.134167	0.039993
Gm13176	0.0255676	0.00175927	0.000638262	0.00185369	0.00694348	0.00866332	0.0014434	0.024606	0	0.0107836	0	0.00118161	0.0475493	0	0.0398824	0.0464893	0
Sephs1	0.492455	0.382518	0.408573	0.381883	0.415324	0.410795	0.279451	0.496145	0.0746488	0.387205	0.0438441	0.319175	0.504084	0.194697	0.482671	0.448273	0.280151
Phyh	0.896008	1.0952	0.866452	1.07387	0.828546	0.982513	1.11838	0.990166	1.77066	0.889652	1.84327	1.22528	0.718083	0.842734	0.8386	0.524002	1.0574
Gm13194	0.000655706	0.000899224	0.000987285	0.00202202	0.00396392	0.000764238	0.00126145	0.00313253	0.0076671	0.000895627	0	0.00921351	0	0	0	0	0
Gm13192	0.308298	0.311429	0.336612	0.325281	0.353251	0.330717	0.319838	0.271375	0.0475992	0.362973	0.0444037	0.300102	0.258378	0.156774	0.257908	0.407203	0.398153
Ucma	0.000297412	0.000263144	0.000205243	0	0.00661992	0.000778683	0	0	0	0	0	0	0	0	0	0	0
Mcm10	0.516394	0.364944	0.249778	0.475731	0.609932	0.791873	0.30009	0.5502	0.0469668	0.32931	0.0777241	0.170192	0.459476	0.0179985	0.591304	0.364216	0
Optn	0.0641883	0.0540394	0.0349287	0.0842228	0.054473	0.0635002	0.285635	0.243716	0.673636	0.0200512	0.449413	0.0753852	0.392471	0.303315	0.0956029	0.231673	0
4930551O13Rik	0.000303833	0	0.000581589	0.000505088	0	0.00027396	0	0.000651576	0	0	0	0	0	0	0	0	0
Camk1d	6.2e-05	0.000220104	0	0.000909039	0.0360245	0.00201586	0	0	0.64916	0.470616	0.95552	0.0225004	0.0201097	0.0521022	0	0.402398	1.29387
Gm13216	0.000178569	0.000639917	0	0.00106556	0	0.000693506	0.00028084	0	0	0	0	0	0	0	0	0.00276751	0
Cdc123	0.915423	0.84598	0.890585	0.879187	0.870665	1.01983	0.751203	0.842351	0.600874	0.856837	0.5919	0.690625	0.852376	0.688459	0.84842	0.844427	0.878341
Nudt5	0.306803	0.270147	0.293633	0.302333	0.310852	0.356046	0.220366	0.294482	0.0359989	0.206595	0.02533	0.192593	0.207578	0.0660507	0.293127	0.305626	0.0268162
Gm13199	0.0072098	0.005404	0.0105237	0.0072486	0.0158652	0.00882261	0.00443657	0.00705098	0	0.00398919	0	0.00799212	0.00128083	0	0.0041045	0.0103823	0
Sec61a2	0.0241172	0.0283674	0.0283136	0.03045	0.0525139	0.0337367	0.0184665	0.020745	0	0.0183372	0	0.0190454	0.00309032	0.016719	0.0330358	0.0135483	0
Dhtkd1	7.2e-05	0.000359711	0.00134495	0.00120409	0.0123419	0.000824959	0.00126378	0.00154893	0	0.000341168	0	0	0	0	0.0017476	0.0137781	0
Upf2	0.37918	0.35549	0.394441	0.40724	0.426753	0.327733	0.510788	0.446715	0.770158	0.3656	1.09954	0.362252	0.589565	0.754315	0.391891	0.516127	0.285098
Proser2	0	0	0	0.000480607	0	0	0	0	0	0.000575084	0	0	0	0	0	0.00774046	0
Gm13384	0.00226448	0	0	0.000645409	0	0.000784884	0.000603989	0.00213735	0	0.00194316	0	0	0.00351347	0	0.00305922	0	0
Echdc3	0.093827	0.207352	0.0649471	0.121186	0.195752	0.094841	0.173124	0.111743	0.0374122	0.0858196	0.428806	0.465542	0.0141447	0.00751819	0.168014	0.0715995	0.0293491
Usp6nl	0.177575	0.138913	0.187901	0.163581	0.188497	0.138746	0.117071	0.165679	0.0473525	0.19521	0.109494	0.117416	0.141285	0.115865	0.167758	0.381376	0.412923
Gm13391	0.000609456	0	0.000660859	0	0	0.000529918	0	0	0	0.0018964	0	0.00214248	0	0	0.00461279	0	0
Celf2	1.831	1.87056	1.72556	1.79056	1.74227	1.75348	1.76145	1.83038	2.59031	1.78175	2.94318	1.83139	1.86374	2.04485	1.81452	2.00974	2.18934
Gm13217	0.00316186	0.00464224	0.00274206	0.00466106	0.00108874	0.00447216	0.00530541	0.000525223	0	0.00119474	0	0.00254394	0.00338367	0	0.00856435	0	0
Gata3	0.000506327	0.000542179	0	0	0	0	0	0	0	0	0.0103387	0	0	0.0106783	0	0.64481	0
Gm13262	0.000597792	0	0	0	0	0.000376975	0	0.000937434	0	0	0	0	0	0	0	0	0
Taf3	0.445397	0.404129	0.436238	0.437278	0.506498	0.443977	0.366684	0.424411	0.182261	0.407974	0.155418	0.306882	0.48086	0.267972	0.391724	0.548977	0.672075
C630004M23Rik	0.00189142	0.00447943	0.00297701	0.00485798	0.00217456	0.00234894	0.00395662	0.00175871	0	0.00471896	0	0.00332603	0.00115079	0.0153105	0.00212876	0.00713336	0.0390352
Atp5c1	1.00743	1.06202	1.13731	1.00281	1.059	1.06911	0.89547	0.90993	0.830565	1.23655	0.693417	0.979326	1.01557	1.04152	0.991026	1.10985	1.04307
Kin	0.198776	0.209581	0.225099	0.217126	0.221526	0.203585	0.270756	0.24532	0.436422	0.255171	0.626186	0.196226	0.325741	0.482628	0.219473	0.283194	0.0940009
Itih5	0.0214555	0.0270263	0.0273331	0.0306564	0.0525963	0.0177899	0.15012	0.0476319	0.352898	0.0108897	0.122661	0.0528145	0.290118	0.371629	0.0206011	0.466552	0
Gm13261	0.0116705	0.0101833	0.0193835	0.00492158	0.0247388	0.0133875	0.00153977	0.00170723	0.0526867	0.0165205	0	0.00257149	0	0.00405536	0	0.0234257	0
Sfmbt2	0.0339436	0.0271342	0.0547231	0.0144223	0.0629746	0.0534981	0.00361182	0.00629863	0.50786	0.090522	0.414411	0.0210496	0.00849956	0.015698	0.022831	0.0169829	0
Prkcq	0.000327687	0	0.000704792	0.000509451	0	0	0.00509239	0	0.00354974	0	0.0448331	0	0	0.00888889	0	0.306481	0
Gm38171	0	0	0	0	0	0	0	0	0.0204888	0	0.014228	0.00167666	0	0	0	0	0
Gm37851	0.000711586	0.00197738	0.000418403	0	0	0.000613846	0	0	0.0228434	0.000709448	0.0560063	0	0.000920303	0	0.00255038	0	0
Gm13292	0.00838672	0.011343	0.00849219	0.0123598	0.0074598	0.0068705	0.0127441	0.0110694	0.0328344	0.0137108	0.0142232	0.00535515	0.00868996	0.0291333	0.00846676	0.00596639	0
Gm13296	0.000143418	0	0.000279081	0.000500631	0	0	0.000928824	0.0011957	0	0	0	0	0	0	0	0	0
Pfkfb3	0.387044	0.364136	0.361158	0.467491	0.357373	0.381571	0.489375	0.496207	0.666972	0.210711	0.786356	0.424344	0.628024	0.712431	0.279369	0.313616	0.527296
Gm10851	0.00143049	0	0.000626746	0.000341261	0.00881671	0.00145372	0.0013789	0.000475771	0.0130659	0.000690984	0	0.000837078	0	0	0.00385811	0	0
Gm37975	0.000765091	0.00052061	0.000816647	0.00103246	0	0.000314699	0.00108378	0.000461288	0	0.00202276	0	0.000800923	0	0	0	0	0
Rbm17	0.924479	0.88672	0.88679	0.871987	0.80676	0.895987	0.857545	0.929701	1.04493	0.772557	0.674355	0.828022	0.832436	0.845353	0.937141	0.912184	0.791308
Il2ra	0.000904028	0.00136444	0.000325204	0.000591044	0	0.00297079	0	0	0	0	0.0103387	0.00109792	0	0	0.00219703	0.281182	0
Il15ra	0.195846	0.191235	0.21167	0.205503	0.254753	0.239453	0.108917	0.113492	0.146625	0.154786	0.153073	0.112143	0.119297	0.0841648	0.140419	0.123712	0.395887
Fbxo18	0.504273	0.553233	0.48796	0.565258	0.498602	0.538924	0.588785	0.460081	0.535022	0.447057	0.658433	0.514401	0.383603	0.592513	0.439102	0.286279	0.338072
Ankrd16	0.330011	0.338575	0.339642	0.376129	0.445704	0.292277	0.403841	0.345308	0.686814	0.312492	0.686862	0.381308	0.314097	0.722752	0.347584	0.34052	0.478982
Itga8	0.0020098	0.00669756	0.00236423	0.00186379	0.0156498	0.00310049	0.0233492	0.0062418	0.0276304	0.0979138	0.0889407	0.0533403	0.00840674	0.0184624	0.00757424	0.0277653	0
E030013I19Rik	0	0	0	0	0	0	0	0	0	0.00116337	0	0.00287988	0	0	0	0	0
Mindy3	0.296845	0.267577	0.251423	0.237045	0.309235	0.23199	0.32023	0.333292	0.456691	0.396484	0.49579	0.338547	0.348129	0.330681	0.379549	0.23462	0.354194
Gm37289	0.00635766	0.00651029	0.00636369	0.00650474	0	0.00613754	0.00321754	0.00803011	0.0390456	0.0102205	0.0970316	0.0069693	0.00493634	0	0.0102238	0.00218886	0
Gm37255	0.00690605	0.00612347	0.0115312	0.00951937	0.0345351	0.00663569	0.0165645	0.0151333	0.0232699	0.00831495	0.14111	0.00983547	0.00960614	0.0198958	0.0134092	0	0
Gm38014	0.00348888	0.00497953	0.00297391	0.00343388	0.00848788	0.00397291	0.00532592	0.00617314	0.0299261	0.00997258	0.0121584	0.00459789	0	0	0.00378713	0	0
Pter	0.130595	0.133489	0.13997	0.105088	0.148065	0.149206	0.0482369	0.071071	0.0115762	0.084521	0.0116917	0.107837	0.0336728	0.0143293	0.10032	0.140539	0.0410745
C1ql3	0	0.000718841	0.000396166	0	0	0.000241956	0	0.000392511	0	0	0	0	0	0	0	0.00322497	0
Gm37824	0.000608078	0.000840085	0.000396166	0.00189761	0.00173157	0.000438437	0	0.000443769	0	0	0	0	0	0	0.00191252	0.00218768	0
Gm37811	0.000140782	0.00020589	0.00172379	0	0	0	0	0	0	0	0	0	0	0	0	0	0
Rsu1	1.4364	1.60036	1.47671	1.51612	1.43863	1.54865	1.62591	1.40023	1.62254	1.38056	1.05073	1.55032	1.20461	1.78111	1.24551	0.975008	1.21464
Gm38156	0.000637821	0.0010152	0.000417597	0	0.00132324	0.00116454	0.00180656	0.00133879	0	0	0	0	0	0	0	0	0
Gm37780	0.0557954	0.111452	0.0709973	0.0813659	0.0504041	0.0617932	0.116342	0.0578335	0.167918	0.0730019	0.149111	0.118641	0.0911106	0.175644	0.0862404	0.0501993	0.0446524
Gm37160	0.000126112	0.00117608	0.00069135	0.00131561	0	0	0	0.000493809	0	0.000608945	0	0	0	0	0	0	0
Gm13270	0.00271884	0.00195357	0.00488837	0.00140533	0.00385655	0.00211634	0.0114471	0.00646691	0.00726794	0.00381318	0.0128429	0.00778917	0.00573563	0	0.00136407	0	0
Cubn	0.000492712	0.00120914	0.000266496	0.00153859	0	0.00198902	0.00242475	0.000809267	0.00656818	0	0.0206663	0.000661286	0.00177186	0	0.00622594	0	0
Trdmt1	0.138174	0.0839857	0.0876404	0.0909096	0.107919	0.0775393	0.0877684	0.132002	0.16312	0.0921252	0.158264	0.0724294	0.0884571	0.116877	0.120928	0.176065	0.143542
Vim	2.5148	2.65647	2.58467	2.27598	2.6806	2.44123	2.71306	2.46528	3.19418	3.34288	2.46212	3.26805	2.80467	3.1994	3.32661	2.36692	2.50292
St8sia6	0	0	0	0.000121216	0	0	0	0	0.00907832	0.00805963	0	0	0	0.00513348	0	0.340116	0.115579
Hacd1	0.395136	0.405661	0.477816	0.46567	0.299703	0.494426	0.237173	0.303692	0.0254929	0.243302	0.0201816	0.235161	0.238803	0.0135018	0.31982	0.387123	0.0455901
D930036K23Rik	0.00101962	0.00321501	0.00404308	0.00153537	0	0.00252668	0.00275045	0.00264356	0	0.00115747	0	0.00235594	0	0.00586913	0.00673994	0.0087937	0
Gm37894	0.0013029	0.00139083	0.0022213	0.00253833	0	0.00191363	0.000684162	0.0027029	0	0.00155055	0	0.00179685	0	0	0.00103503	0	0
Stamos	0.00505816	0.00925709	0.0100128	0.00343242	0.00483985	0.00398247	0.00279162	0.00497644	0.0127485	0.00163461	0	0.00875622	0.0043227	0	0.00532003	0.0018473	0
Stam	0.232518	0.212947	0.229754	0.203536	0.241021	0.216913	0.197062	0.21969	0.262752	0.253554	0.324223	0.184027	0.154424	0.311826	0.250683	0.377368	0.176059
Gm37499	0.00167061	0.00180904	0.00544024	0.00320507	0	0.00420684	0.00174351	0.0031076	0	0.00214806	0	0	0.00124585	0.00701357	0.00482687	0.0384186	0
Gm13320	0	0.000474875	0.000758081	0	0	0	0	0	0	0	0	0	0	0.0045073	0.00122318	0.0018473	0
Mrc1	0.0369612	0.0545513	0.0408534	0.0487409	0.050711	0.0363641	0.0200022	0.0302437	0.0127485	0.119565	0	0.0766581	0.0105761	0	0.0683705	0	0.328258
Gm37697	0.0196577	0.0236394	0.043711	0.0395654	0.0314676	0.0411721	0.0192672	0.017805	0	0.00581278	0	0.00812548	0	0	0.0110554	0	0
Cacnb2	0.0173218	0.0101716	0.0112233	0.0101573	0.00934201	0.0274895	0	0.00652485	0.00600088	0.00960324	0	0.00865579	0.0209797	0	0.0180888	0.0280964	0
Gm38105	0.000391555	0	0	0	0	0	0	0	0	0	0	0	0	0	0	0	0
Gm13268	0.01644	0.0157962	0.0187025	0.0219071	0.00422785	0.0188565	0.0111777	0.0165462	0	0.0170266	0	0.0128468	0.00599689	0.0113409	0.0133778	0.0163025	0
2900092N22Rik	0.00045724	0.000586708	0.000541382	0.00101866	0.0062367	0.000312771	0	0.00330029	0	0	0	0.00195101	0.00830469	0.00385515	0	0.00243842	0
Gm13315	0	0	0	0	0	0	0	0.000624465	0	0.00078303	0	0	0	0	0.00104163	0	0
Gm38273	0.000133447	0.000304776	0.000455039	0	0.00183047	0.000579741	0	0	0	0.000802455	0	0	0	0	0	0	0
Gm37891	0.000257034	0.000738576	0.000393397	0	0	0.000425507	0	0.000473362	0	0	0	0	0	0	0	0	0
Nsun6	0.131459	0.113127	0.104807	0.124106	0.138276	0.118957	0.103009	0.116072	0.142015	0.0825246	0.056673	0.127313	0.036347	0.114225	0.171795	0.0798424	0.205274
Gm36930	0.00263852	0.00100514	0.00196262	0.000962703	0	0.00286786	0	0.000592348	0	0	0	0	0	0	0.00128942	0	0
Arl5b	0.130289	0.12911	0.144421	0.130658	0.147029	0.101807	0.132081	0.145257	0.25042	0.15272	0.325667	0.176633	0.120936	0.250902	0.138127	0.26496	0.109651
Gm38257	0.00405687	0.00424196	0.00471776	0.00273606	0	0.00327769	0.00539503	0.00417875	0.0162928	0.0061208	0.0106811	0.000849235	0.0053513	0.0122817	0.00598132	0.006009	0
Gm13313	0.013469	0.0141862	0.0163672	0.0155859	0.0283389	0.0163752	0.00582487	0.0125572	0.00442955	0.0100624	0	0.00883539	0.0245087	0.0240559	0.0154436	0.0302001	0
Gm13365	0	0.000498518	0	0	0	0.000565527	0	0	0	0.00290668	0	0	0.00752625	0.00977626	0	0	0
Gm13368	0.000936267	0.000424174	0.000242634	0.000823361	0	0	0	0.000568114	0	0	0	0.00161456	0	0	0	0	0
Plxdc2	0	0	0	0	0	0	0	0.000609659	0	0.00236697	0	0	0	0	0	0.151449	0.101738
Gm13326	0	0.000446198	0.000458034	0	0	0	0	0	0	0.000580181	0	0	0	0	0.00112664	0	0
Nebl	0.48895	0.645517	0.380208	0.611781	0.177648	0.318378	0.494634	0.564237	0	0.00901336	0.0114573	0.465352	0.00597472	0	0.495202	0.0850701	0
A930004D18Rik	0	0.000549512	0.000713896	0.00124434	0	0	0.00187713	0	0.0200647	0.00211704	0.0131943	0.000580374	0	0	0.00330409	0.0101469	0
Skida1	0.00012033	0	0	0	0.00730083	0	0	0.000775666	0	0	0	0	0	0	0	0	0
1810059C17Rik	0.000722739	0.000663467	0.000475461	0.00131207	0.000375627	0.000464306	0.000741934	0	0	0	0	0	0	0	0	0	0
Mllt10	0.710586	0.619748	0.6098	0.653404	0.646704	0.657034	0.671237	0.719058	1.06375	0.551319	0.971614	0.53241	0.771031	0.799596	0.614693	0.830489	0.62585
Gm23638	0.00315887	0.00214121	0.00415709	0.00504101	0.00313812	0.00206792	0.00595236	0.00214222	0.00804099	0.00432072	0	0.00343101	0.00236051	0	0.00562551	0	0.0824102
Gm25147	0.0010166	0.000350777	0.00128263	0.00202486	0	0.000639157	0	0	0	0	0	0	0.00354184	0	0	0	0
Gm13351	0.000868274	0.000996971	0	0	0	0	0.00193662	0.00140902	0	0	0	0	0	0	0.000670527	0	0
Dnajc1	0.56282	0.591902	0.510169	0.628923	0.576143	0.591545	0.591838	0.526791	0.104154	0.469862	0.07058	0.532284	0.419927	0.342108	0.531465	0.621535	0.481581
Gm13350	0.000769575	0.000404619	0.000297592	0.0007038	0	0.000462602	0	0.000624324	0	0	0	0	0	0	0	0	0
Gm13349	0.00313777	0.00228111	0.000930491	0.00661038	0.00251781	0.00316228	0.00432069	0.00415517	0	0	0	0.00369771	0	0	0.0018386	0	0
Gm13352	0.00106145	0.00136578	0.00329081	0.0024429	0.000627003	0.00109899	0.00135704	0.00171015	0.0214261	0.00115894	0	0.00223631	0.0132615	0	0.00148178	0.00441176	0
Commd3	0.726302	0.725561	0.691979	0.712999	0.695591	0.704574	0.640595	0.738388	0.267167	0.64684	0.147506	0.659528	0.551105	0.469312	0.77098	0.61489	0.4534
Bmi1	0.432228	0.459016	0.48317	0.439921	0.380451	0.451225	0.418607	0.438626	0.0474158	0.36587	0.0252573	0.441268	0.230219	0.0334494	0.456532	0.490053	0.18946
Spag6	0.0119839	0.00785199	0.00989316	0.00550364	0.00729813	0.0118783	0.00456291	0.00365408	0	0.00541262	0	0.0098786	0.00247716	0	0.0128764	0.0282327	0
Gm20539	0.000106443	0	0	0	0	0.00143162	0.000640719	0	0	0	0	0	0	0	0	0	0
Pip4k2a	0.562733	0.672765	0.498733	0.540079	0.663574	0.526705	0.744556	0.627172	1.47382	1.1287	1.93717	1.03263	0.608933	0.793886	0.823691	1.02576	2.03076
4930426L09Rik	0.00418866	0.00488393	0.00508292	0.00401989	0.00624699	0.00442262	0.00431545	0.00483394	0.0205608	0.00738383	0.0644851	0.0033944	0	0.00807298	0.0129383	0.00553168	0.0489255
Armc3	0.0480004	0.0581057	0.0660085	0.0752818	0.037835	0.0452536	0.12792	0.0697208	0.223849	0.0340052	0.18063	0.0639862	0.06427	0.178175	0.0502465	0.0460663	0
4930447M23Rik	0	0.000190027	0.000602461	0.000275445	0	0	0	0	0.0100992	0	0	0	0	0	0	0	0
Msrb2	0.109321	0.135686	0.135258	0.148641	0.0803455	0.116086	0.236851	0.111019	0.492515	0.0759355	0.170984	0.129457	0.319358	0.44656	0.0853312	0.153812	0.0537363
Gm33940	0.000100561	0.000342785	0.00021237	0.000614125	0	0	0	0.000834688	0	0	0	0	0	0	0	0	0
Otud1	0.143472	0.102055	0.102664	0.114613	0.119002	0.1262	0.125775	0.192074	0.174478	0.117224	0.406421	0.114223	0.0914515	0.159543	0.162201	0.376714	0.249831
Etl4	0.0331928	0.0383034	0.0427522	0.00545356	0.0914651	0.0564921	0.0151066	0.00191492	0.00791332	0.140641	0	0.0355837	0	0	0.0447173	0.0679632	0
Gm13361	0.000195927	0	0	0	0	0	0	0	0	0	0	0	0.00465496	0	0	0.0167228	0
Gm13360	0.000382306	0.000640787	0.000189664	0.000821605	0.00366631	0.00102871	0.00052643	0	0	0.00188475	0	0.00102106	0.00249459	0	0.00103892	0	0
Gm13328	0.0651934	0.054572	0.0626	0.0547956	0.0625264	0.0537969	0.026118	0.0405296	0.00500869	0.0411401	0	0.0318068	0.0224634	0.00483207	0.0441738	0.0541272	0
Arhgap21	0.322242	0.321236	0.327144	0.311975	0.361248	0.377049	0.276315	0.308921	0.021806	0.255855	0.0275415	0.279113	0.185707	0.0275174	0.331042	0.328883	0.0404228
Gm13380	0.000965171	0.000711324	0.000384176	0.000700102	0	0	0.000534109	0	0	0	0	0.00121204	0.00176238	0	0	0	0
Gm13375	0.0216545	0.0262838	0.0198773	0.0217761	0.0269422	0.0271913	0.0284366	0.0286712	0	0.0291814	0	0.0298816	0.0239798	0.0239118	0.0273434	0.0397306	0
Enkur	0.0186014	0.0307401	0.0195074	0.0201262	0.0194966	0.0189433	0.00912401	0.016279	0	0.00888319	0	0.049682	0.00101014	0	0.0629823	0.0234581	0
Thnsl1	0.0424352	0.0520073	0.0516998	0.0455302	0.0524472	0.0491272	0.0284967	0.0284281	0.00377696	0.0536438	0	0.0489666	0.00423151	0	0.0521119	0.0219491	0.0497646
Gm13378	0.0120605	0.0137755	0.0125814	0.014719	0.0193756	0.014531	0.0109406	0.00897335	0.0466929	0.0273176	0.0410423	0.00336746	0.0139677	0.0383267	0.0123454	0.0302619	0.0529818
Gm13379	0	0.000289594	0.000587147	0	0	0	0.00070178	0	0	0	0	0	0	0	0	0	0
Gm13342	0.00235327	0.00221029	0.00157405	0.0029045	0	0.00358376	0.00515854	0.00305593	0.00681215	0	0.016781	0.00258447	0.0118354	0.00961768	0.000634591	0.0186187	0
Gm13341	0.0504984	0.0523964	0.046557	0.0482827	0.0542298	0.0447992	0.0410595	0.0525455	0.0155662	0.05348	0	0.047612	0.0296172	0.0186567	0.0411106	0.0734627	0
Gm13340	0.373387	0.366864	0.356249	0.365039	0.551735	0.360491	0.346703	0.33564	0.146785	0.3944	0.0516026	0.387803	0.378682	0.284442	0.349231	0.397566	0.319861
Gm13339	0.00369654	0.00342771	0.00268264	0.00314499	0.00121969	0.00646867	0.00280561	0.00115983	0.00759644	0.00504063	0	0.00385801	0.000960135	0	0	0.00134015	0
Gm13338	0.000507405	0	0.000255376	0	0	0	0	0	0	0	0	0	0	0	0.000769328	0	0
Apbb1ip	1.06995	1.19813	0.997379	1.27386	1.07578	1.02109	1.87695	1.40491	2.90646	1.50671	3.35234	1.64035	1.83561	2.21495	1.1009	1.57375	2.72603
A130006I12Rik	0.000260682	0.000735789	0.000205504	0.000738304	0	0	0.000727484	0	0	0.00123604	0	0	0	0	0.00122211	0.00269578	0
Pdss1	0.0803514	0.0496055	0.0735816	0.0647829	0.0812991	0.0760749	0.0400506	0.0600522	0.0139013	0.0526878	0.0239295	0.0373298	0.0602602	0.0327284	0.0597939	0.0869277	0
Gm25544	0.000221169	0.000780807	0.000321279	0.000365374	0	0.0010271	0	0.000392269	0	0	0	0	0	0	0	0	0
Gm14441	0.000268438	0.00026372	0.00027081	0.00234036	0	0.00151511	0	0.000323928	0	0.000753952	0	0.00151386	0	0	0	0.00204726	0
Abi1	0.847874	0.871323	0.861683	0.84595	0.785403	0.724114	1.119	0.963029	1.60029	0.997618	1.57784	1.07309	0.969479	1.18078	0.958307	0.977539	1.27801
Gm13357	0	0.000350241	0	0	0.00244384	0.000459562	0	0.000555557	0	0.000701523	0	0	0	0	0	0	0
Acbd5	0.282477	0.351057	0.295359	0.271614	0.312385	0.24194	0.337805	0.253453	0.623289	0.462486	0.75291	0.463898	0.255616	0.449415	0.398488	0.340897	0.494933
Mastl	0.241929	0.0646815	0.0469681	0.0777829	0.155316	0.198743	0.0587747	0.310336	0.0364577	0.137369	0.0495047	0.0343031	0.24417	0.0358743	0.320931	0.078883	0
Yme1l1	0.854907	0.788804	0.785434	0.785385	0.72905	0.751592	0.779616	0.845892	1.09158	0.719094	1.25907	0.813826	0.693485	0.835209	0.829641	0.858144	0.816739
Gm13423	0.00232252	0.00476046	0.00296232	0.00179933	0.00563459	0.00183769	0.00384586	0.00148505	0.00602112	0.00581338	0.0296537	0.00209696	0.00566928	0	0	0.0217169	0
4931423N10Rik	0.000272182	0	0.000283081	0.00126922	0	0	0	0	0	0	0	0.000675716	0	0	0	0	0
Gm13422	0.0818597	0.0738472	0.0872196	0.0832795	0.0622529	0.0794773	0.0814091	0.0759118	0.190143	0.134246	0.222717	0.0455628	0.103474	0.129026	0.0712339	0.147037	0.199693
Gm38309	0.00356294	0.00214292	0.0024046	0.00418707	0.0034327	0.00398201	0.00707538	0.00187194	0	0.00226589	0	0.000899837	0.0248539	0.0108082	0.00213537	0	0.0418216
Spopl	0.181089	0.175811	0.165153	0.171838	0.224933	0.180488	0.192777	0.174003	0.120291	0.171145	0.0381019	0.201105	0.170728	0.19114	0.18891	0.134131	0.181873
Gm13392	0.00200822	0.00114015	0.000439425	0.000862261	0	0.00237037	0.00247108	0.000591381	0.00434323	0.00220102	0	0	0	0.00511485	0.00154779	0	0
Hnmt	0.671107	0.680262	0.703775	0.731968	0.642368	0.740711	0.631458	0.601802	0.912626	0.620476	1.07626	0.633656	0.377154	0.217103	0.605105	0.13666	0.410073
Gm13410	0.0139976	0.0111536	0.0117317	0.0078947	0.0274469	0.00653863	0.0112121	0.00871086	0.00587169	0.015624	0.0148697	0.00779591	0.00505075	0.00386757	0.0105313	0.0119338	0.0583743
Il1f9	0.738168	1.23302	0.515731	1.40809	0.666352	0.858772	2.24823	1.52977	2.88377	0.743418	3.23789	1.82221	0.376061	0.728978	1.01705	0.147866	0.221137
Il1f6	0	0.00188311	0	0.000373367	0	0	0	0	0	0.00227294	0.0164278	0.000811525	0	0	0	0	0
Il1rn	0.0743778	0.164617	0.0685269	0.135963	0.0768156	0.0647818	1.94498	0.455808	2.28519	0.415472	2.49166	0.834375	0.467875	1.23877	0.262598	0.132214	0.182528
Psd4	0.384401	0.501495	0.407544	0.455268	0.481602	0.380342	0.67307	0.471072	1.18161	0.382778	1.145	0.620482	0.671944	1.01407	0.477158	0.742988	0.264636
Pax8	1.01483	1.1786	0.876474	1.07777	0.843075	0.946428	1.40096	1.25737	0.218722	0.724459	0.154379	1.19439	0.553126	0.575548	1.07008	0.0849743	0.0484116
Gm13415	0.00230483	0.00341876	0.00125525	0.00201257	0.00513427	0.00304367	0.00278464	0.00167876	0	0.00412339	0	0.00498812	0	0	0	0	0
Gm13418	0.000798524	0	0	0.000317153	0	0	0	0	0	0	0	0	0	0	0	0	0
Gm13416	0.0216128	0.0312674	0.017698	0.0386875	0.0114944	0.0271102	0.0748065	0.0485475	0.00778387	0.0235019	0	0.0418973	0.017066	0.0262942	0.01989	0.0522817	0
Cacna1b	0.0026324	0.0148634	0.00213281	0.000796381	0.00132441	0.00227515	0.00185947	0.00294198	0	0.00104355	0	0.0213553	0	0	0.0310795	0	0
Ehmt1	0.45629	0.458088	0.411558	0.46855	0.440567	0.4585	0.433707	0.428262	0.262759	0.452707	0.274501	0.418736	0.486713	0.261203	0.429967	0.576179	0.53849
Gm38147	0	0	0	0.000862781	0	0	0	0	0	0	0	0	0.00555598	0	0	0	0
Gm37139	0.000544437	0.000296595	0.00170557	0.0025352	0	0.00090849	0.00647632	0	0	0.0027021	0	0.00124621	0	0	0.00220813	0	0
Arrdc1	0.280626	0.311371	0.241907	0.291582	0.36097	0.283228	0.370195	0.327739	0.84949	0.430208	0.739981	0.353129	0.582999	0.860473	0.27168	0.503287	0.573386
Zmynd19	0.189753	0.271136	0.307914	0.293469	0.262024	0.373612	0.15341	0.1502	0.0293995	0.16182	0	0.130112	0.125531	0.0429971	0.149525	0.282136	0.18898
Dph7	0.0578784	0.0472855	0.0630728	0.0633143	0.0765766	0.0493085	0.025281	0.038172	0.0119857	0.0384691	0	0.0317285	0.0371634	0.00533747	0.0535933	0.106576	0
Mrpl41	0.525826	0.444033	0.443257	0.505993	0.452359	0.556487	0.397703	0.505523	0.407822	0.383441	0.378708	0.340339	0.665056	0.567852	0.425419	0.579274	0.375119
Pnpla7	0.323023	0.394432	0.312546	0.434823	0.521983	0.319782	0.791902	0.430653	1.24394	0.403552	1.4894	0.503819	0.545745	1.08609	0.281194	0.458052	0.791165
Gm13370	0.00126077	0.00295583	0.00406499	0.00175146	0	0.00300061	0.000606115	0.000713147	0	0.00701007	0	0.00238796	0.00459353	0	0.000653472	0.000771841	0
Gm13369	0.00218814	0.00152967	0.0027817	0.00324231	0.000960143	0.00291981	0.00251427	0.0024096	0	0.00569563	0	0.00499943	0.0104955	0.00586913	0	0.00176036	0
Gm25518	0	0.000312111	0.00022769	0	0	0.000400747	0	0	0	0.000474613	0	0	0	0.00441659	0	0	0
Nsmf	0.0321498	0.0288084	0.0245275	0.0266773	0.0478523	0.0356094	0.0204239	0.0278744	0.0665962	0.0405211	0.0291545	0.0383429	0.0168812	0.0549804	0.0452867	0.0480852	0
Tor4a	0.200331	0.228595	0.16875	0.213472	0.158571	0.160392	0.325414	0.218613	0.623257	0.129521	0.803459	0.310888	0.29033	0.444206	0.230538	0.266792	0.277818
Nelfb	0.243936	0.242941	0.237256	0.252076	0.23278	0.232033	0.300177	0.239849	0.400032	0.243448	0.573992	0.244465	0.348935	0.331855	0.257984	0.482359	0.24052
Gm22572	0.00022778	0.000214295	0.000578652	0	0	0.000510121	0	0.00111464	0	0.000430831	0	0	0	0	0	0.00485646	0
Fam166a	0.00334448	0.0015011	0.000274252	0.000840763	0	0.00270256	0.00358392	0.00132815	0.0068907	0.00312484	0.0104811	0.000877213	0.00307205	0	0	0.00198735	0
Tubb4b	1.37303	0.44662	0.559086	0.521542	0.930387	0.771556	0.470588	1.46159	0.727703	0.726411	0.699349	0.385182	1.17733	0.668388	1.34206	0.873374	0.25198
Rnf208	0.00528308	0.0143587	0.00548044	0.00447924	0.0397173	0.00731481	0.00380216	0.00315192	0	0.00878593	0.0137306	0.00428461	0.00420549	0	0.0104059	0.00691328	0
Ndor1	0.0599748	0.0567996	0.0633371	0.0601098	0.0727445	0.0623552	0.0402419	0.0539142	0.0231536	0.0557355	0.0113785	0.0535733	0.0224315	0.0245184	0.0615698	0.0789606	0.0373925
Tmem203	0.0866435	0.0928341	0.0700546	0.0845547	0.0880002	0.0830321	0.105371	0.0799017	0.142026	0.0894884	0.283759	0.123067	0.123276	0.150293	0.0872543	0.0805004	0.145632
Tprn	0.154876	0.144886	0.1524	0.147297	0.141811	0.141415	0.133379	0.12122	0.118452	0.117846	0.0905157	0.120774	0.158846	0.122557	0.151268	0.136792	0.0404228
Ssna1	0.754134	0.599103	0.629194	0.650427	0.72124	0.6514	0.712874	0.877555	0.80539	0.723711	0.686422	0.554455	1.13157	0.904034	0.704952	0.690122	0.522692
Anapc2	0.307618	0.292091	0.269108	0.279119	0.303638	0.284536	0.338261	0.305847	0.621438	0.3056	0.427722	0.311499	0.394719	0.529959	0.32817	0.284487	0.3698
Grin1os	0.000615293	0.00050635	0.00137082	0.000711767	0	0.000688838	0	0.000436171	0	0	0	0	0	0	0	0	0
AA543186	0.00118129	0.00108584	0.00124483	0.00183997	0	0.0018466	0.000673631	0.000409433	0	0	0.0101057	0.0023887	0.000642138	0.00233321	0.0014232	0.0100169	0
Man1b1	0.35757	0.301181	0.363071	0.35434	0.348946	0.348306	0.344075	0.359922	0.402771	0.294396	0.455183	0.262153	0.383785	0.336548	0.305125	0.46983	0.252226
Gm25220	0.0015244	0.00142974	0.00159667	0.000774244	0.00206825	0.00216739	0.00219328	0.00206183	0	0	0	0.00112755	0.00711233	0.00850516	0	0	0
Dpp7	0.255349	0.209136	0.261987	0.216845	0.288311	0.239949	0.157108	0.193935	0.0556837	0.298339	0.0826636	0.194462	0.101113	0.13778	0.276453	0.117714	0.138927
Uap1l1	0.391166	0.395866	0.384883	0.348088	0.431834	0.375826	0.376648	0.345872	0.337435	0.373093	0.384671	0.42548	0.365618	0.414312	0.482679	0.176178	0.0813948
Sapcd2	0.188847	0.0119874	0.0267431	0.0262713	0.112078	0.0557605	0.00746293	0.171012	0.00229517	0.0447896	0	0.00208261	0.215032	0.0103253	0.210965	0.118722	0
Entpd2	0.000783557	0.00102205	0.00144309	0.0011467	0	0.000738428	0.000706629	0	0	0	0	0	0	0	0.00208878	0	0
Npdc1	0.0145534	0.0100179	0.0110808	0.0108146	0.00412668	0.0167296	0.0024472	0.00514933	0	0.000969323	0	0.00769509	0	0.00553614	0.010743	0.0115093	0
Fut7	0.0895248	0.146828	0.0624866	0.0713155	0.0855638	0.056857	0.0858213	0.0818261	0.392048	0.104595	0.250576	0.220688	0.141912	0.19722	0.165544	0.266722	0.198141
Abca2	0.340503	0.391634	0.367284	0.379888	0.493482	0.361758	0.391512	0.34383	0.423808	0.288734	0.401643	0.346978	0.306033	0.308554	0.33005	0.752203	0.469772
Paxx	0.176149	0.151833	0.133923	0.146255	0.137045	0.122533	0.193239	0.203815	0.620699	0.118769	0.642893	0.166835	0.302854	0.522746	0.171253	0.252277	0.379905
Clic3	0.000803059	0.000334789	0.000868851	0.00221188	0.00388625	0.00131185	0	0	0	0.000941893	0	0	0	0	0.00203536	0.00175027	0
Ptgds	0.00484549	0.00931179	0.00225102	0.00369315	0	0.00466727	0.000621381	0.00245792	0	0.00212441	0	0.000726982	0	0.00405536	0	0	0
Lcn12	0.00138826	0.00259333	0.0023976	0.00313604	0	0.00168033	0.00599642	0.00200214	0	0.00338686	0	0.00163723	0.00161214	0	0	0	0
C8g	0.0210551	0.0211002	0.0275427	0.0274127	0.0226897	0.021847	0.017832	0.0218836	0	0.0114477	0	0.0253474	0.0106266	0.0178822	0.0172908	0.00916147	0
Fbxw5	0.149849	0.131359	0.125398	0.122452	0.162031	0.137847	0.11581	0.103869	0.107566	0.158132	0.189607	0.107878	0.101509	0.179772	0.119136	0.234188	0.264278
Traf2	0.141098	0.102628	0.104564	0.122156	0.0846919	0.139333	0.11423	0.151463	0.139563	0.144247	0.104265	0.0878985	0.277201	0.258413	0.14171	0.194644	0.228716
Gm13433	0.000330461	0.000278892	0.000958044	0.00141289	0	0	0.00071926	0.000483711	0.00469452	0	0.0143433	0.00157218	0	0	0.000914052	0	0
Edf1	1.27798	1.25104	1.28603	1.2617	1.24511	1.28133	1.20026	1.28909	0.939156	1.17938	1.02143	1.1855	1.18487	1.1979	1.27502	1.01496	1.05731
Mamdc4	0.0266458	0.0257778	0.0187472	0.0254474	0.0230231	0.024738	0.016863	0.028608	0.00675126	0.010351	0.0113785	0.0242014	0.0222481	0.00948089	0.0165787	0.0175722	0
Phpt1	0.414444	0.410936	0.448069	0.414301	0.44806	0.382388	0.308875	0.322042	0.0868712	0.275269	0.035516	0.309775	0.185274	0.106445	0.331533	0.445352	0
Rabl6	0.583227	0.529877	0.623366	0.562658	0.593855	0.593153	0.444197	0.492721	0.159756	0.494596	0.104786	0.368823	0.458346	0.32445	0.512146	0.609791	0.723349
Fcnaos	0.000311431	0.000307687	0	0.000800535	0.0030929	0.00276115	0	0.000946409	0	0	0	0	0	0	0.000949642	0	0
Ccdc183	0.010043	0.0120673	0.0126683	0.0172464	0.00237836	0.0135827	0.00627954	0.00293555	0	0.00735461	0	0.0073955	0	0	0.00781358	0.0129262	0
Tmem141	0.287558	0.329644	0.380909	0.329472	0.375698	0.330908	0.245609	0.187247	0.102104	0.384754	0.0223173	0.358702	0.191291	0.18021	0.264978	0.210913	0.210253
Fcna	0.0029574	0.00181647	0.00649836	0.0105552	0	0.00284632	0.0130333	0.00579131	0	0.0138724	0	0.00305301	0	0	0.00338414	0	0
Bmyc	0.000727303	0.00117842	0.0035262	0.00211517	0.0246762	0.00264733	0	0	0.00882393	0.104881	0.0639476	0	0.0207912	0.00535359	0	0.294023	0.305356
Camsap1	0.162175	0.159955	0.17468	0.174882	0.11988	0.159208	0.101297	0.123241	0.0161304	0.125452	0.0381139	0.139844	0.0582544	0.016186	0.113424	0.287008	0.176618
Gm13542	0.00012591	0	0.000421357	0.00102937	0	0	0	0	0	0.00558626	0	0	0.000793837	0	0	0	0
Ubac1	0.405707	0.352977	0.3338	0.344094	0.435033	0.387669	0.245003	0.327369	0.065949	0.284174	0.127038	0.282002	0.216242	0.148506	0.405406	0.757662	0.164818
Nacc2	0.0467074	0.104136	0.0685006	0.0745796	0.140426	0.0846116	0.0774923	0.0471385	0	0.127071	0.0121718	0.106284	0.0139303	0	0.0668066	0.0551489	0.0913638
Tmem250-ps	0.252793	0.256515	0.269016	0.246275	0.201842	0.226807	0.206882	0.188594	0.0293658	0.205781	0.0678935	0.225108	0.142943	0.041523	0.202637	0.325701	0.215645
1810012K08Rik	0.000366004	0	0.00090442	0.000817742	0	0.000357297	0	0.000711946	0	0.000941008	0	0.00105765	0	0	0.00200763	0.00175027	0
Qsox2	0.0608578	0.0430061	0.0497079	0.0475141	0.0684487	0.0604692	0.0238123	0.0433797	0.00163809	0.0441368	0	0.0345663	0.0277571	0.0134167	0.0713497	0.0759146	0
Gpsm1	0.0164341	0.0145028	0.0153406	0.0106091	0.00549188	0.0186011	0.0126957	0.0207772	0	0.0161583	0.0669849	0.0172775	0.00368195	0.0116567	0.0102066	0.0932453	0
Dnlz	0.162755	0.143072	0.137014	0.131071	0.145587	0.138628	0.102635	0.123028	0.131647	0.104547	0.043851	0.110755	0.160504	0.151415	0.157542	0.179586	0.302138
Card9	0.195289	0.231634	0.169823	0.208172	0.266281	0.198333	0.224021	0.214969	0.276632	0.168628	0.36825	0.23127	0.209848	0.275916	0.173331	0.0470435	0.21994
Gm13562	0.0123633	0.0142294	0.0155604	0.0119201	0.0146976	0.0210837	0.00975277	0.00636524	0.0101882	0.00783277	0	0.0115005	0.00315557	0.0166967	0.00442616	0.0229957	0
Snapc4	0.179034	0.166432	0.207959	0.165507	0.292005	0.188327	0.118591	0.144089	0.00409678	0.129199	0.078044	0.10657	0.0561981	0.0684313	0.143123	0.301449	0.0561508
Gm13563	0.00290394	0.00438418	0.00321859	0.00601077	0.000800696	0.00632351	0.00657804	0.00197094	0	0.00107745	0	0.00601266	0.00367624	0.00601986	0.00523523	0.00336766	0
Sdccag3	0.22447	0.218167	0.220982	0.21109	0.322557	0.216917	0.279318	0.291606	0.613892	0.306461	0.642772	0.275385	0.442086	0.673502	0.23734	0.33111	0.479259
Pmpca	0.197496	0.162826	0.170712	0.170933	0.170643	0.190063	0.122301	0.184774	0.110235	0.150693	0.141927	0.149617	0.17295	0.208295	0.176839	0.216387	0.226022
Inpp5e	0.0540954	0.0529162	0.0502194	0.050515	0.0308136	0.0466648	0.0635266	0.058209	0.135115	0.0452796	0.175573	0.0600946	0.207964	0.0905964	0.0383667	0.154839	0.0628316
Sec16a	0.294646	0.31758	0.346046	0.299143	0.366948	0.282694	0.282166	0.234558	0.361307	0.33464	0.442532	0.31695	0.265551	0.338809	0.233193	0.394908	0.169998
0610009E02Rik	0.00136083	0.00556524	0.00312737	0.00329097	0	0.00364592	0.00917021	0.0029008	0.00257463	0.00293387	0	0.00274459	0.00182867	0	0.00472483	0	0
Notch1	0.107382	0.190346	0.127962	0.145047	0.168399	0.109253	0.343812	0.148186	1.00785	0.204308	1.08524	0.341092	0.389451	0.730864	0.158705	0.332793	0.188351
Egfl7	0.0558113	0.0492263	0.053853	0.0678194	0.0915621	0.0673332	0.0392625	0.0520992	0.0181024	0.021548	0	0.0175304	0.154362	0.0607539	0.045089	0.271398	0
Agpat2	0.301789	0.281463	0.260621	0.353382	0.333302	0.250558	0.676536	0.475429	1.01728	0.234158	0.618079	0.269596	1.23851	1.50777	0.239307	0.2423	0.0973966
Fam69b	0.114293	0.139622	0.0949205	0.154483	0.152724	0.155068	0.135362	0.129387	0.0126003	0.0146732	0.0150937	0.0600739	0.208497	0.0804971	0.0779377	0.239657	0.0295213
Snhg7	0.000368073	0.000545841	0.000685772	0	0	0	0	0.00166952	0	0	0	0	0	0	0	0	0
Snora17	0.0562038	0.0675256	0.0793881	0.0888628	0.120716	0.0735903	0.0469038	0.0564633	0	0.0338525	0.007364	0.0420251	0.000793837	0	0.0357787	0.0122402	0.0479206
Snhg7os	0.00285718	0.00697899	0.00156614	0.00588442	0.00143921	0.00243379	0.0104765	0.00797579	0	0	0	0.00390467	0	0	0.00216906	0	0
Lcn4	0.294092	0.4301	0.12687	0.628571	0.264215	0.158512	1.02173	0.733221	0.00257463	0.0058562	0	0.426832	0.10125	0.013936	0.254029	0.104681	0
Gm13359	0.00960694	0.010347	0.0153984	0.00977104	0.0125134	0.00762395	0.00949647	0.0141981	0	0.00672369	0	0.00317733	0.00208693	0.0117318	0.0084098	0.0175789	0
Abo	0.000785415	0.00168858	0.000980592	0.00421204	0	0.00129238	0.00190467	0.00432515	0	0	0	0.00241834	0	0	0.00199663	0	0
Surf6	0.403526	0.369571	0.365614	0.438109	0.355293	0.35587	0.375851	0.3715	0.0663657	0.256207	0.0128712	0.298024	0.203917	0.0782511	0.335315	0.363803	0.0731268
Med22	0.583604	0.583582	0.53723	0.64192	0.515846	0.495056	0.693156	0.67442	0.389177	0.426501	0.223568	0.545605	0.29576	0.292899	0.518145	0.235933	0.245343
Rpl7a	0.182863	0.187093	0.204853	0.197452	0.179716	0.18907	0.142362	0.169276	0.157273	0.197919	0.0873964	0.158734	0.257049	0.205931	0.164615	0.308125	0.0799614
Gm23969	0.00241788	0.00228234	0.00272858	0.000833037	0.00256043	0.00182617	0.00148845	0.00165377	0	0.00200953	0	0.00481825	0.00120895	0	0	0	0
Surf1	0.2265	0.235329	0.250643	0.250259	0.209541	0.205415	0.240858	0.233494	0.392399	0.274491	0.318536	0.206036	0.258372	0.393932	0.245768	0.324114	0.124078
Surf2	0.0946403	0.0924992	0.0961843	0.105078	0.0997685	0.0864722	0.0588209	0.0682198	0.0157435	0.107737	0.0177189	0.07014	0.0946218	0.0548976	0.096976	0.107069	0.145573
Surf4	0.800931	0.902207	0.899172	0.902309	0.838977	0.925674	0.839374	0.757437	0.72307	0.824943	0.67737	0.869134	0.725205	0.624805	0.760965	0.568174	0.535704
Stkld1	0.00210322	0.00628331	0.00128765	0.00156947	0	0.00395805	0.00413724	0.0026225	0.0157581	0.00367273	0	0.00655506	0.00351181	0	0	0.0074201	0
Rexo4	0.377607	0.309176	0.371487	0.312799	0.342222	0.314711	0.276094	0.313491	0.143252	0.29979	0.0582738	0.248544	0.2478	0.341012	0.324308	0.414842	0.409507
Adamts13	0.0011158	0.00207894	0.00129873	0.00327209	0	0.000312225	0.00612052	0	0	0	0	0	0	0	0.00283946	0	0
Cacfd1	0.242121	0.253519	0.229365	0.224711	0.209225	0.218026	0.21571	0.19642	0.143734	0.28113	0.208768	0.221931	0.126909	0.134732	0.235491	0.215448	0.394267
Slc2a6	0.00518902	0.0569251	0.00926404	0.00531151	0.062309	0.0166559	0.0461279	0.0106235	0.934391	0.353665	1.78357	0.341458	0.0139923	0.039964	0.096493	0.0635835	0.555854
Adamtsl2	0.000584837	0.00252538	0.000468582	0.000383907	0.007541	0.00104166	0	0	0	0	0	0.0011762	0	0	0	0.0256157	0
Fam163b	0.000103556	0.000796107	0	0	0	0	0	0	0	0	0	0	0	0	0	0	0
Sardh	0	0	0	0	0	0.000734424	0.00059916	0	0	0.000391163	0	0.000941126	0	0	0	0.00202242	0
Vav2	0.0326612	0.0308143	0.0283364	0.0256806	0.0571087	0.0371389	0.00870362	0.0242955	0	0.114031	0	0.0241638	0.00216756	0	0.0394036	0.0551969	0.26644
Gm24049	0	0	0.000702001	0	0	0.000300112	0.000789439	0	0	0	0	0	0.000581628	0	0	0	0
Brd3os	0.00980263	0.00856753	0.00870124	0.00613059	0	0.00458115	0.0067779	0.003805	0.0087251	0.00777936	0.0153194	0.00588341	0.00519353	0	0.00541791	0.00465531	0
Brd3	0.585312	0.565449	0.559399	0.61535	0.590937	0.603201	0.673941	0.667636	1.39879	0.525447	0.874935	0.483893	1.15768	1.44945	0.551947	0.728731	0.269857
Wdr5	0.646485	0.646392	0.633219	0.637072	0.646643	0.64624	0.638697	0.687483	0.649673	0.42159	0.525667	0.615576	0.550707	0.428479	0.671479	0.529492	0.246154
Gm25541	0.00154776	0.000612122	0.000998841	0.00233696	0	0.00179588	0	0.000718013	0.0064545	0	0.0220115	0.0018149	0.00483348	0	0.00217665	0.0057988	0
Gm13421	0.0262606	0.0393359	0.0303224	0.0469466	0.022755	0.0347974	0.0437848	0.0241694	0.0158601	0.0142586	0.0442296	0.0282384	0.0293434	0.0813945	0.0186006	0.00994837	0
Rxra	0.137825	0.189914	0.12261	0.134015	0.152722	0.130618	0.23882	0.191829	0.180029	0.262672	0.118065	0.329749	0.0725683	0.0429583	0.216285	0.0382386	0.088876
Col5a1	0.000796651	0.00244941	0.00259505	0.00207154	0.010468	0	0.0544768	0.00517388	0.0590068	0.00831609	0	0.0143623	0.0572278	0.172443	0.00580063	0.153821	0.116844
Fcnb	0.210142	0.181476	0.102787	0.692255	0.520628	0.143049	1.33226	0.931369	0.772697	0.275635	0.693227	0.258208	3.20282	2.03905	0.0647137	0.357693	0.242428
Gm13371	0	0.000566633	0.000435163	0.000411846	0.00598045	0.000572077	0.00376975	0	0.0208041	0	0	0.00252305	0.00150227	0.00679197	0	0	0
F730016J06Rik	0.0109673	0.034833	0.00502906	0.0658069	0.028081	0.0093907	0.376136	0.104187	0.484008	0.0227744	0.0483488	0.0958222	0.302431	0.982677	0.00614976	0.00760461	0
Olfm1	0.000295015	0	0.000756907	0.00023288	0.0655109	0.000721601	0	0.00118139	0.0439144	0.536535	0.0146787	0.00825615	0.0775626	0.0414016	0	0.356035	0.61669
Gm13373	0	0	0	0	0	0	0	0	0	0.025304	0	0	0	0	0	0.0589389	0.132764
Ppp1r26	0.000194454	0	0.000238275	0	0	0	0	0	0	0.00123203	0	0	0.00249016	0	0	0.0269637	0
1700007K13Rik	0	0	0.000362976	0	0	0	0.00354265	0	0	0	0	0	0	0	0.00152592	0	0
Mrps2	0.344732	0.286329	0.301196	0.282532	0.26478	0.337656	0.166836	0.255936	0.046117	0.270078	0.0153194	0.214025	0.1533	0.0264426	0.298355	0.300969	0.294648
Rpsa-ps9	0.033617	0.0422432	0.0367939	0.0435841	0.0355893	0.0369409	0.0302443	0.0373124	0.00697743	0.0385785	0	0.0431184	0.0341625	0.0198491	0.0362836	0.0786599	0
Gm10134	0	0	0	0	0	0.000362523	0	0.000236656	0	0.000262978	0	0	0	0	0	0	0
Ralgds	0.0104397	0.0298802	0.0103267	0.00567458	0.013464	0.0159416	0.00271314	0.00385176	0.00355736	0.065494	0.0343436	0.0542658	0.00143849	0	0.0508217	0.0551957	0.128387
Gm13381	0.000197903	0	0.000273194	0	0	0.000358515	0	0.000488785	0	0.000724116	0	0	0	0	0	0	0
Gtf3c5	0.21616	0.171985	0.159693	0.150821	0.229634	0.197901	0.120504	0.187516	0.0101342	0.172222	0	0.153084	0.112242	0.0626272	0.232414	0.193123	0
Gfi1b	0.000116455	0	0.000342897	0	0.0169332	0	0	0	0.0188805	0.00147694	0.0134357	0	0	0.0143195	0	0.497276	0
Tsc1	0.153553	0.133107	0.153867	0.124914	0.116076	0.11525	0.114809	0.134426	0.11836	0.155762	0.0727333	0.138843	0.150595	0.0963987	0.137142	0.136074	0.205605
Spaca9	0.00713379	0.0104347	0.00530837	0.00485903	0.0145825	0.0120666	0.0088615	0.011839	0.0122207	0.043129	0.0337565	0.0153848	0.0222135	0.0189854	0.0190033	0.0185087	0
Ak8	0.00098284	0	0.000666672	0.000699088	0.00580803	0.000318587	0.000512876	0.000614103	0	0.0186213	0	0.00309401	0	0.00833011	0.00196356	0.0151612	0
Gtf3c4	0.177494	0.157597	0.212987	0.185067	0.193631	0.177512	0.126446	0.16781	0.0719999	0.137512	0.073073	0.116446	0.101163	0.0666924	0.145588	0.141983	0.0701841
Ddx31	0.122977	0.107295	0.111232	0.100542	0.0885422	0.123669	0.0574523	0.0914085	0.0131907	0.110646	0	0.0639153	0.0746475	0.0595168	0.103741	0.123545	0.111688
Barhl1	0.00068448	0.00136459	0.000682786	0.000925662	0	0.00172698	0.000657261	0	0	0	0	0.00102467	0	0	0	0	0
Cfap77	0.00026583	0	0	0.000751934	0.00160075	0.000346984	0.000560252	0	0	0.00148795	0	0	0	0	0	0	0
Gm13394	0.224478	0.259985	0.236346	0.235905	0.276687	0.241691	0.304369	0.236815	0.580258	0.228257	0.350195	0.293452	0.258291	0.501183	0.264194	0.138383	0.127391
Ttf1	0.43761	0.427896	0.408839	0.418778	0.402426	0.375749	0.487154	0.456044	0.565384	0.383023	0.763698	0.406241	0.508882	0.44807	0.416467	0.501109	0.495085
Setx	1.00636	1.0538	1.05266	1.08389	1.00159	1.04108	0.953672	0.980516	1.03938	0.766465	1.52707	0.947306	0.663479	0.679961	0.99309	1.01903	0.995811
Ntng2	0.010596	0.0150213	0.0089759	0.0116087	0.00280793	0.0110751	0.0989329	0.0235949	0.262684	0.0172533	0.299501	0.0237738	0.0706318	0.231614	0.0147641	0.00980096	0.0413047
6530402F18Rik	0.105854	0.15024	0.142753	0.127274	0.100031	0.0997343	0.217962	0.122668	0.298596	0.120472	0.298525	0.144544	0.194026	0.460801	0.0788859	0.0552306	0.109319
Med27	0.147928	0.124833	0.11965	0.118275	0.193682	0.115729	0.101182	0.130302	0.043841	0.187792	0.0367454	0.12254	0.182133	0.0636822	0.152556	0.120171	0.128335
Gm24976	0.000176257	0	0.000383757	0	0	0	0	0	0	0	0	0	0	0	0	0	0
Rapgef1	0.31982	0.253071	0.312782	0.244479	0.313404	0.254692	0.244186	0.26062	0.483961	0.391005	0.590389	0.286243	0.378498	0.406756	0.309533	0.734994	0.456746
Gm13547	0.000228309	0	0.000244519	0	0	0	0	0	0	0	0	0.00335425	0	0	0	0	0
Trub2	0.235721	0.24451	0.200717	0.229169	0.223033	0.221565	0.269364	0.241265	0.412265	0.214278	0.325543	0.300351	0.191222	0.308121	0.231638	0.298416	0.16893
[truncated: 22,775 more rows]
