# Supplementary material for: Partial differentiation induction of leukemia cells co-opts NK cells to erode leukemic stemness
Source: Research Square preprint supplement (doi:10.21203/rs.3.rs-8399393/v1), 2026-01-16
Supplement: Supplementary file 5 [file 9a2496e97c6548509502a454.xlsx]

## Sheet: Gene
Table S5:Gene expression of RAC8_12_13L subsets
GeneID	GeneName	Chr	Strand	Start	End	Annotation	Class	RAC8_12_13L-1	RAC8_12_13L-2	RAC8_12_13L-3
ENSMUSG00000000001	Gnai3	3	-	108107280	108146146	guanine nucleotide binding protein (G protein), alpha inhibiting 3 [Source:MGI Symbol;Acc:MGI:95773]	protein_coding	35.2702	36.0149	36.7685
ENSMUSG00000000003	Pbsn	X	-	77837901	77853623	probasin [Source:MGI Symbol;Acc:MGI:1860484]	protein_coding	-0.0218442	0.00557232	0.0166669
ENSMUSG00000000028	Cdc45	16	-	18780447	18811987	cell division cycle 45 [Source:MGI Symbol;Acc:MGI:1338073]	protein_coding	2.09947	2.21427	2.20682
ENSMUSG00000000031	H19	7	-	142575529	142578143	H19, imprinted maternally expressed transcript [Source:MGI Symbol;Acc:MGI:95891]	lincRNA	0.389585	0.381665	0.378403
ENSMUSG00000000037	Scml2	X	+	161082525	161258213	Scm polycomb group protein like 2 [Source:MGI Symbol;Acc:MGI:1340042]	protein_coding	-0.0124899	0.00664707	0.0059612
ENSMUSG00000000049	Apoh	11	+	108343354	108414396	apolipoprotein H [Source:MGI Symbol;Acc:MGI:88058]	protein_coding	0.80974	0.769203	0.743281
ENSMUSG00000000056	Narf	11	+	121237253	121255856	nuclear prelamin A recognition factor [Source:MGI Symbol;Acc:MGI:1914858]	protein_coding	1.0822	1.24636	1.28932
ENSMUSG00000000058	Cav2	6	+	17281185	17289115	caveolin 2 [Source:MGI Symbol;Acc:MGI:107571]	protein_coding	0.290472	0.204876	0.172327
ENSMUSG00000000078	Klf6	13	+	5861482	5870394	Kruppel-like factor 6 [Source:MGI Symbol;Acc:MGI:1346318]	protein_coding	43.2839	42.3491	41.592
ENSMUSG00000000085	Scmh1	4	+	120405281	120530186	sex comb on midleg homolog 1 [Source:MGI Symbol;Acc:MGI:1352762]	protein_coding	0.225582	0.158194	0.111331
ENSMUSG00000000088	Cox5a	9	+	57521274	57532426	cytochrome c oxidase subunit 5A [Source:MGI Symbol;Acc:MGI:88474]	protein_coding	77.9244	81.8984	83.7651
ENSMUSG00000000093	Tbx2	11	+	85832551	85841948	T-box 2 [Source:MGI Symbol;Acc:MGI:98494]	protein_coding	0.00844269	0.038876	0.0511515
ENSMUSG00000000094	Tbx4	11	+	85886422	85916097	T-box 4 [Source:MGI Symbol;Acc:MGI:102556]	protein_coding	0.0959041	0.0821075	0.0732453
ENSMUSG00000000120	Ngfr	11	-	95568818	95587735	nerve growth factor receptor (TNFR superfamily, member 16) [Source:MGI Symbol;Acc:MGI:97323]	protein_coding	0.0350984	0.0127878	-0.000383568
ENSMUSG00000000125	Wnt3	11	+	103774150	103817957	wingless-type MMTV integration site family, member 3 [Source:MGI Symbol;Acc:MGI:98955]	protein_coding	0.116372	0.116168	0.110697
ENSMUSG00000000126	Wnt9a	11	+	59306928	59333552	wingless-type MMTV integration site family, member 9A [Source:MGI Symbol;Acc:MGI:2446084]	protein_coding	0.000983388	0.000203153	-0.00118533
ENSMUSG00000000127	Fer	17	+	63863062	64139496	fer (fms/fps related) protein kinase [Source:MGI Symbol;Acc:MGI:105917]	protein_coding	0.754768	0.776643	0.774384
ENSMUSG00000000131	Xpo6	7	-	126101715	126200501	exportin 6 [Source:MGI Symbol;Acc:MGI:2429950]	protein_coding	2.24622	2.63627	2.81732
ENSMUSG00000000134	Tfe3	X	+	7762560	7775202	transcription factor E3 [Source:MGI Symbol;Acc:MGI:98511]	protein_coding	9.31835	9.41822	9.39774
ENSMUSG00000000142	Axin2	11	+	108920349	108950783	axin 2 [Source:MGI Symbol;Acc:MGI:1270862]	protein_coding	0.238692	0.206557	0.188374
ENSMUSG00000000148	Brat1	5	+	140705011	140719379	BRCA1-associated ATM activator 1 [Source:MGI Symbol;Acc:MGI:1891679]	protein_coding	2.16625	2.43733	2.48546
ENSMUSG00000000149	Gna12	5	-	140758408	140830431	guanine nucleotide binding protein, alpha 12 [Source:MGI Symbol;Acc:MGI:95767]	protein_coding	4.34131	4.68149	4.85985
ENSMUSG00000000154	Slc22a18	7	+	143473736	143499334	solute carrier family 22 (organic cation transporter), member 18 [Source:MGI Symbol;Acc:MGI:1336884]	protein_coding	1.79638	1.82613	1.79489
ENSMUSG00000000157	Itgb2l	16	-	96422288	96443619	integrin beta 2-like [Source:MGI Symbol;Acc:MGI:1277979]	protein_coding	8.28469	8.08804	7.80716
ENSMUSG00000000159	Igsf5	16	+	96361668	96422121	immunoglobulin superfamily, member 5 [Source:MGI Symbol;Acc:MGI:1919308]	protein_coding	0.778553	0.781668	0.778777
ENSMUSG00000000167	Pih1d2	9	+	50617321	50625000	PIH1 domain containing 2 [Source:MGI Symbol;Acc:MGI:1919864]	protein_coding	0.0231389	0.0548518	0.0434688
ENSMUSG00000000168	Dlat	9	-	50634633	50659780	dihydrolipoamide S-acetyltransferase (E2 component of pyruvate dehydrogenase complex) [Source:MGI Symbol;Acc:MGI:2385311]	protein_coding	2.19083	2.50973	2.72575
ENSMUSG00000000171	Sdhd	9	-	50596357	50603812	succinate dehydrogenase complex, subunit D, integral membrane protein [Source:MGI Symbol;Acc:MGI:1914175]	protein_coding	182.692	175.768	171.248
ENSMUSG00000000182	Fgf23	6	+	127072902	127081408	fibroblast growth factor 23 [Source:MGI Symbol;Acc:MGI:1891427]	protein_coding	-0.00351894	0.00468749	-0.00115074
ENSMUSG00000000183	Fgf6	6	+	127015586	127028187	fibroblast growth factor 6 [Source:MGI Symbol;Acc:MGI:95520]	protein_coding	0.0481196	0.0418295	0.0347048
ENSMUSG00000000184	Ccnd2	6	-	127125162	127152193	cyclin D2 [Source:MGI Symbol;Acc:MGI:88314]	protein_coding	2.30565	2.36568	2.43454
ENSMUSG00000000194	Gpr107	2	+	31152316	31218775	G protein-coupled receptor 107 [Source:MGI Symbol;Acc:MGI:2139054]	protein_coding	2.91314	2.54273	2.30413
ENSMUSG00000000197	Nalcn	14	-	123276634	123627144	sodium leak channel, non-selective [Source:MGI Symbol;Acc:MGI:2444306]	protein_coding	0.244475	0.125934	0.119458
ENSMUSG00000000202	Btbd17	11	-	114791217	114795945	BTB (POZ) domain containing 17 [Source:MGI Symbol;Acc:MGI:1919264]	protein_coding	0.146187	0.107839	0.0857361
ENSMUSG00000000204	Slfn4	11	+	83175186	83190216	schlafen 4 [Source:MGI Symbol;Acc:MGI:1329010]	protein_coding	33.1752	33.0926	32.9963
ENSMUSG00000000214	Th	7	-	142892752	142931128	tyrosine hydroxylase [Source:MGI Symbol;Acc:MGI:98735]	protein_coding	0.0615472	0.0710987	0.071975
ENSMUSG00000000215	Ins2	7	-	142678656	142743381	insulin II [Source:MGI Symbol;Acc:MGI:96573]	protein_coding	18.0693	21.5156	22.997
ENSMUSG00000000216	Scnn1g	7	+	121734479	121768475	sodium channel, nonvoltage-gated 1 gamma [Source:MGI Symbol;Acc:MGI:104695]	protein_coding	0.0496573	0.00596237	-0.0167738
ENSMUSG00000000223	Drp2	X	+	134404551	134456573	dystrophin related protein 2 [Source:MGI Symbol;Acc:MGI:107432]	protein_coding	0.0726951	0.0742068	0.0702465
ENSMUSG00000000244	Tspan32	7	+	143005046	143019644	tetraspanin 32 [Source:MGI Symbol;Acc:MGI:1350360]	protein_coding	44.6778	48.5229	50.5186
ENSMUSG00000000247	Lhx2	2	+	38339281	38369733	LIM homeobox protein 2 [Source:MGI Symbol;Acc:MGI:96785]	protein_coding	0.17205	0.127967	0.146612
ENSMUSG00000000248	Clec2g	6	+	128934381	128984707	C-type lectin domain family 2, member g [Source:MGI Symbol;Acc:MGI:1918059]	protein_coding	0.0291455	-0.0110852	-0.0174281
ENSMUSG00000000253	Gmpr	13	+	45507444	45553800	guanosine monophosphate reductase [Source:MGI Symbol;Acc:MGI:1913605]	protein_coding	0.422045	0.428642	0.416086
ENSMUSG00000000263	Glra1	11	-	55514238	55608198	glycine receptor, alpha 1 subunit [Source:MGI Symbol;Acc:MGI:95747]	protein_coding	0.645602	0.594464	0.564333
ENSMUSG00000000266	Mid2	X	+	140664599	140767715	midline 2 [Source:MGI Symbol;Acc:MGI:1344333]	protein_coding	0.120084	0.0803547	0.0810817
ENSMUSG00000000275	Trim25	11	+	88999376	89020293	tripartite motif-containing 25 [Source:MGI Symbol;Acc:MGI:102749]	protein_coding	2.76032	2.69845	2.74991
ENSMUSG00000000276	Dgke	11	-	89035179	89066850	diacylglycerol kinase, epsilon [Source:MGI Symbol;Acc:MGI:1889276]	protein_coding	0.174538	0.179298	0.178446
ENSMUSG00000000278	Scpep1	11	-	88924020	88955465	serine carboxypeptidase 1 [Source:MGI Symbol;Acc:MGI:1921867]	protein_coding	0.73545	0.44784	0.33026
ENSMUSG00000000282	Mnt	11	+	74830920	74845725	max binding protein [Source:MGI Symbol;Acc:MGI:109150]	protein_coding	10.1291	8.76646	8.16606
ENSMUSG00000000290	Itgb2	10	+	77530252	77565708	integrin beta 2 [Source:MGI Symbol;Acc:MGI:96611]	protein_coding	132.195	102.172	89.5609
ENSMUSG00000000295	Hddc2	10	+	31313383	31328204	HD domain containing 2 [Source:MGI Symbol;Acc:MGI:1916942]	protein_coding	18.2895	18.8078	19.2333
ENSMUSG00000000296	Tpd52l1	10	-	31332376	31445958	tumor protein D52-like 1 [Source:MGI Symbol;Acc:MGI:1298386]	protein_coding	0.0988648	0.114087	0.142365
ENSMUSG00000000301	Pemt	11	-	59970614	60046489	phosphatidylethanolamine N-methyltransferase [Source:MGI Symbol;Acc:MGI:104535]	protein_coding	0.367894	0.302992	0.272061
ENSMUSG00000000303	Cdh1	8	+	106603351	106670246	cadherin 1 [Source:MGI Symbol;Acc:MGI:88354]	protein_coding	1.71025	1.73681	1.73116
ENSMUSG00000000305	Cdh4	2	+	179442431	179899373	cadherin 4 [Source:MGI Symbol;Acc:MGI:99218]	protein_coding	0.196491	0.214777	0.22049
ENSMUSG00000000308	Ckmt1	2	+	121357714	121363737	creatine kinase, mitochondrial 1, ubiquitous [Source:MGI Symbol;Acc:MGI:99441]	protein_coding	4.56475	4.71032	4.61699
ENSMUSG00000000317	Bcl6b	11	-	70224128	70229798	B cell CLL/lymphoma 6, member B [Source:MGI Symbol;Acc:MGI:1278332]	protein_coding	0.00748864	-8.29112e-06	-0.00742475
ENSMUSG00000000318	Clec10a	11	+	70156197	70170834	C-type lectin domain family 10, member A [Source:MGI Symbol;Acc:MGI:96975]	protein_coding	0.068425	0.0886903	0.0794576
ENSMUSG00000000320	Alox12	11	-	70241457	70255353	arachidonate 12-lipoxygenase [Source:MGI Symbol;Acc:MGI:87998]	protein_coding	-0.0435818	0.119209	0.207014
ENSMUSG00000000325	Arvcf	16	+	18348182	18407076	armadillo repeat gene deleted in velocardiofacial syndrome [Source:MGI Symbol;Acc:MGI:109620]	protein_coding	0.112472	0.159945	0.143825
ENSMUSG00000000326	Comt	16	-	18406886	18426852	catechol-O-methyltransferase [Source:MGI Symbol;Acc:MGI:88470]	protein_coding	7.5092	7.59874	7.67073
ENSMUSG00000000339	Rtca	3	-	116488963	116508208	RNA 3'-terminal phosphate cyclase [Source:MGI Symbol;Acc:MGI:1913618]	protein_coding	0.847308	1.03529	1.12247
ENSMUSG00000000340	Dbt	3	+	116513070	116549981	dihydrolipoamide branched chain transacylase E2 [Source:MGI Symbol;Acc:MGI:105386]	protein_coding	0.156097	0.16098	0.177829
ENSMUSG00000000346	Dazap2	15	+	100615349	100620761	DAZ associated protein 2 [Source:MGI Symbol;Acc:MGI:1344344]	protein_coding	275.607	292.145	301.728
ENSMUSG00000000355	Mcts1	X	+	38600578	38613426	malignant T cell amplified sequence 1 [Source:MGI Symbol;Acc:MGI:1916245]	protein_coding	5.4276	5.08066	4.80382
ENSMUSG00000000359	Rem1	2	+	152626951	152635198	rad and gem related GTP binding protein 1 [Source:MGI Symbol;Acc:MGI:1097696]	protein_coding	-0.0147641	0.00931163	0.00562142
ENSMUSG00000000365	Rnf17	14	+	56402581	56525032	ring finger protein 17 [Source:MGI Symbol;Acc:MGI:1353419]	protein_coding	0.0215469	0.0626271	0.0889669
ENSMUSG00000000374	Trappc10	10	-	78186725	78244641	trafficking protein particle complex 10 [Source:MGI Symbol;Acc:MGI:1336209]	protein_coding	2.18717	2.12298	2.03776
ENSMUSG00000000378	Ccm2	11	+	6546887	6596744	cerebral cavernous malformation 2 [Source:MGI Symbol;Acc:MGI:2384924]	protein_coding	19.9152	20.1348	20.1497
ENSMUSG00000000381	Wap	11	-	6635482	6638637	whey acidic protein [Source:MGI Symbol;Acc:MGI:98943]	protein_coding	0.113128	0.0838302	0.070842
ENSMUSG00000000384	Tbrg4	11	-	6615598	6626067	transforming growth factor beta regulated gene 4 [Source:MGI Symbol;Acc:MGI:1100868]	protein_coding	15.3608	15.4397	15.5423
ENSMUSG00000000385	Tmprss2	16	-	97564682	97611195	transmembrane protease, serine 2 [Source:MGI Symbol;Acc:MGI:1354381]	protein_coding	0.527031	0.604617	0.638069
ENSMUSG00000000386	Mx1	16	-	97447035	97462907	MX dynamin-like GTPase 1 [Source:MGI Symbol;Acc:MGI:97243]	polymorphic_pseudogene	0.0928079	0.0772318	0.0719803
ENSMUSG00000000392	Fap	2	-	62500943	62574075	fibroblast activation protein [Source:MGI Symbol;Acc:MGI:109608]	protein_coding	0.0218389	0.0103411	0.00721631
ENSMUSG00000000394	Gcg	2	-	62474530	62483650	glucagon [Source:MGI Symbol;Acc:MGI:95674]	protein_coding	2.89603	3.00244	3.00436
ENSMUSG00000000399	Ndufa9	6	-	126821721	126849136	NADH:ubiquinone oxidoreductase subunit A9 [Source:MGI Symbol;Acc:MGI:1913358]	protein_coding	17.2757	15.904	14.851
ENSMUSG00000000402	Egfl6	X	-	166523007	166585720	EGF-like-domain, multiple 6 [Source:MGI Symbol;Acc:MGI:1858599]	protein_coding	0.0201187	0.0360897	0.0396245
ENSMUSG00000000409	Lck	4	-	129548344	129573641	lymphocyte protein tyrosine kinase [Source:MGI Symbol;Acc:MGI:96756]	protein_coding	0.290423	0.09689	0.0246794
ENSMUSG00000000411	Tssk3	4	-	129489014	129491022	testis-specific serine kinase 3 [Source:MGI Symbol;Acc:MGI:1929914]	protein_coding	0.0591466	0.0348148	0.017709
ENSMUSG00000000416	Cttnbp2	6	-	18366478	18514843	cortactin binding protein 2 [Source:MGI Symbol;Acc:MGI:1353467]	protein_coding	0.188724	0.108673	0.0785433
ENSMUSG00000000420	Galnt1	18	+	24205344	24286818	polypeptide N-acetylgalactosaminyltransferase 1 [Source:MGI Symbol;Acc:MGI:894693]	protein_coding	2.39814	2.44101	2.43709
ENSMUSG00000000435	Myf5	10	-	107482908	107486134	myogenic factor 5 [Source:MGI Symbol;Acc:MGI:97252]	protein_coding	0.0365651	-0.00455748	0.0210692
ENSMUSG00000000439	Mkrn2	6	+	115601902	115622624	makorin, ring finger protein, 2 [Source:MGI Symbol;Acc:MGI:1914277]	protein_coding	4.03418	3.65768	3.50722
ENSMUSG00000000440	Pparg	6	+	115360951	115490399	peroxisome proliferator activated receptor gamma [Source:MGI Symbol;Acc:MGI:97747]	protein_coding	0.770182	0.771814	0.75869
ENSMUSG00000000441	Raf1	6	-	115618067	115676635	v-raf-leukemia viral oncogene 1 [Source:MGI Symbol;Acc:MGI:97847]	protein_coding	10.2714	11.3236	11.6104
ENSMUSG00000000486	Septin1	7	-	127214447	127233130	septin 1 [Source:MGI Symbol;Acc:MGI:1858916]	protein_coding	0.0960942	0.147787	0.180078
ENSMUSG00000000489	Pdgfb	15	-	79995874	80014977	platelet derived growth factor, B polypeptide [Source:MGI Symbol;Acc:MGI:97528]	protein_coding	0.153158	0.190308	0.21438
ENSMUSG00000000530	Acvrl1	15	+	101128522	101145336	activin A receptor, type II-like 1 [Source:MGI Symbol;Acc:MGI:1338946]	protein_coding	0.237347	0.293828	0.320826
ENSMUSG00000000531	Grasp	15	+	101224188	101232756	GRP1 (general receptor for phosphoinositides 1)-associated scaffold protein [Source:MGI Symbol;Acc:MGI:1860303]	protein_coding	0.270967	0.00777355	-0.0774766
ENSMUSG00000000532	Acvr1b	15	+	101174067	101213684	activin A receptor, type 1B [Source:MGI Symbol;Acc:MGI:1338944]	protein_coding	1.30504	1.18098	1.13177
ENSMUSG00000000538	Tom1l2	11	-	60226714	60352905	target of myb1-like 2 (chicken) [Source:MGI Symbol;Acc:MGI:2443306]	protein_coding	1.02487	0.9748	0.976638
ENSMUSG00000000544	Gpa33	1	+	166130238	166166510	glycoprotein A33 (transmembrane) [Source:MGI Symbol;Acc:MGI:1891703]	protein_coding	2.22557	2.24825	2.25704
ENSMUSG00000000552	Zfp385a	15	-	103313895	103340093	zinc finger protein 385A [Source:MGI Symbol;Acc:MGI:1352495]	protein_coding	0.311153	0.302223	0.311248
ENSMUSG00000000555	Itga5	15	-	103344286	103366763	integrin alpha 5 (fibronectin receptor alpha) [Source:MGI Symbol;Acc:MGI:96604]	protein_coding	19.6465	19.1886	19.0378
ENSMUSG00000000560	Gabra2	5	-	70957597	71095849	gamma-aminobutyric acid (GABA) A receptor, subunit alpha 2 [Source:MGI Symbol;Acc:MGI:95614]	protein_coding	0.0539694	0.085069	0.06835
ENSMUSG00000000561	Wdr77	3	+	105959369	105970037	WD repeat domain 77 [Source:MGI Symbol;Acc:MGI:1917715]	protein_coding	1.41902	1.36446	1.28575
ENSMUSG00000000562	Adora3	3	+	105870858	105908926	adenosine A3 receptor [Source:MGI Symbol;Acc:MGI:104847]	protein_coding	-0.138885	0.119349	0.275078
ENSMUSG00000000563	Atp5pb	3	-	105942698	105960099	ATP synthase peripheral stalk-membrane subunit b [Source:MGI Symbol;Acc:MGI:1100495]	protein_coding	77.5666	77.24	76.9235
ENSMUSG00000000567	Sox9	11	+	112782224	112787760	SRY (sex determining region Y)-box 9 [Source:MGI Symbol;Acc:MGI:98371]	protein_coding	0.41295	0.428554	0.421318
ENSMUSG00000000568	Hnrnpd	5	-	99955935	99978938	heterogeneous nuclear ribonucleoprotein D [Source:MGI Symbol;Acc:MGI:101947]	protein_coding	5.06705	5.54805	5.83238
ENSMUSG00000000579	Dynlt1c	17	+	6601671	6609774	dynein light chain Tctex-type 1C [Source:MGI Symbol;Acc:MGI:3807476]	protein_coding	38.093	37.3111	36.4768
ENSMUSG00000000581	C1d	11	+	17257579	17269176	C1D nuclear receptor co-repressor [Source:MGI Symbol;Acc:MGI:1927354]	protein_coding	8.04673	8.91662	9.34141
ENSMUSG00000000594	Gm2a	11	+	55098115	55113029	GM2 ganglioside activator protein [Source:MGI Symbol;Acc:MGI:95762]	protein_coding	37.6764	36.3867	36.002
ENSMUSG00000000600	Krit1	5	+	3803184	3845564	KRIT1, ankyrin repeat containing [Source:MGI Symbol;Acc:MGI:1930618]	protein_coding	2.71158	2.26075	2.06323
ENSMUSG00000000605	Clcn4	7	-	7282309	7300851	chloride channel, voltage-sensitive 4 [Source:MGI Symbol;Acc:MGI:104571]	protein_coding	1.26008	1.5193	1.62662
ENSMUSG00000000606	Vmn2r88	14	+	51410820	51420721	vomeronasal 2, receptor 88 [Source:MGI Symbol;Acc:MGI:1316662]	protein_coding	0.027231	0.023422	0.0225506
ENSMUSG00000000617	Grm6	11	+	50850685	50866208	glutamate receptor, metabotropic 6 [Source:MGI Symbol;Acc:MGI:1351343]	protein_coding	0.0525333	0.058604	0.0607517
ENSMUSG00000000627	Sema4f	6	-	82911885	82939769	sema domain, immunoglobulin domain (Ig), TM domain, and short cytoplasmic domain [Source:MGI Symbol;Acc:MGI:1340055]	protein_coding	0.0232517	0.014734	0.00517727
ENSMUSG00000000628	Hk2	6	-	82725025	82774454	hexokinase 2 [Source:MGI Symbol;Acc:MGI:1315197]	protein_coding	10.4843	10.762	10.8693
ENSMUSG00000000631	Myo18a	11	+	77763246	77865980	myosin XVIIIA [Source:MGI Symbol;Acc:MGI:2667185]	protein_coding	7.01546	6.87925	6.78046
ENSMUSG00000000632	Sez6	11	+	77930800	77979048	seizure related gene 6 [Source:MGI Symbol;Acc:MGI:104745]	protein_coding	0.210151	0.217015	0.20838
ENSMUSG00000000673	Haao	17	-	83831156	83847963	3-hydroxyanthranilate 3,4-dioxygenase [Source:MGI Symbol;Acc:MGI:1349444]	protein_coding	0.329564	0.339283	0.319331
ENSMUSG00000000682	Cd52	4	-	134082448	134095082	CD52 antigen [Source:MGI Symbol;Acc:MGI:1346088]	protein_coding	203.391	185.67	177.717
ENSMUSG00000000686	Abhd15	11	+	77515121	77538607	abhydrolase domain containing 15 [Source:MGI Symbol;Acc:MGI:1914727]	protein_coding	1.64263	1.71528	1.79482
ENSMUSG00000000690	Hoxb6	11	+	96292476	96301569	homeobox B6 [Source:MGI Symbol;Acc:MGI:96187]	protein_coding	0.0260347	0.0469952	0.0564751
ENSMUSG00000000693	Loxl3	6	+	83034173	83052562	lysyl oxidase-like 3 [Source:MGI Symbol;Acc:MGI:1337004]	protein_coding	1.75224	1.63947	1.64211
ENSMUSG00000000701	Tcl1b5	12	+	105176344	105181145	T cell leukemia/lymphoma 1B, 5 [Source:MGI Symbol;Acc:MGI:1351635]	protein_coding	0.158509	0.159487	0.159981
ENSMUSG00000000706	Btn1a1	13	-	23456992	23465901	butyrophilin, subfamily 1, member A1 [Source:MGI Symbol;Acc:MGI:103118]	protein_coding	1.58222	1.58422	1.58038
ENSMUSG00000000708	Kat2b	17	+	53566861	53672720	K(lysine) acetyltransferase 2B [Source:MGI Symbol;Acc:MGI:1343094]	protein_coding	6.17441	5.82156	5.60762
ENSMUSG00000000711	Rab5b	10	-	128677175	128696264	RAB5B, member RAS oncogene family [Source:MGI Symbol;Acc:MGI:105938]	protein_coding	5.84183	5.76574	5.71335
ENSMUSG00000000724	Cryba1	11	-	77718615	77725283	crystallin, beta A1 [Source:MGI Symbol;Acc:MGI:88518]	protein_coding	0.0171485	-0.00127342	-0.0156058
ENSMUSG00000000730	Dnmt3l	10	+	78041947	78063622	DNA (cytosine-5-)-methyltransferase 3-like [Source:MGI Symbol;Acc:MGI:1859287]	protein_coding	19.5528	20.434	20.3882
ENSMUSG00000000731	Aire	10	-	78030022	78043610	autoimmune regulator (autoimmune polyendocrinopathy candidiasis ectodermal dystrophy) [Source:MGI Symbol;Acc:MGI:1338803]	protein_coding	0.0308557	0.0416662	0.0437472
ENSMUSG00000000732	Icosl	10	+	78069302	78083913	icos ligand [Source:MGI Symbol;Acc:MGI:1354701]	protein_coding	0.414948	0.390113	0.389906
ENSMUSG00000000738	Spg7	8	+	123062942	123097760	SPG7, paraplegin matrix AAA peptidase subunit [Source:MGI Symbol;Acc:MGI:2385906]	protein_coding	8.59747	8.59471	8.38524
ENSMUSG00000000739	Sult5a1	8	-	123140192	123158315	sulfotransferase family 5A, member 1 [Source:MGI Symbol;Acc:MGI:1931463]	protein_coding	0.0783781	0.0804397	0.0896917
ENSMUSG00000000740	Rpl13	8	+	123102350	123105244	ribosomal protein L13 [Source:MGI Symbol;Acc:MGI:105922]	protein_coding	607.389	584.606	574.064
ENSMUSG00000000743	Chmp1a	8	-	123204264	123212763	charged multivesicular body protein 1A [Source:MGI Symbol;Acc:MGI:1920159]	protein_coding	12.1721	12.8638	13.379
ENSMUSG00000000751	Rpa1	11	-	75298166	75348324	replication protein A1 [Source:MGI Symbol;Acc:MGI:1915525]	protein_coding	1.29233	1.23026	1.19643
ENSMUSG00000000753	Serpinf1	11	-	75409769	75422701	serine (or cysteine) peptidase inhibitor, clade F, member 1 [Source:MGI Symbol;Acc:MGI:108080]	protein_coding	0.373083	0.444151	0.470702
ENSMUSG00000000759	Tubgcp3	8	-	12614277	12672248	tubulin, gamma complex associated protein 3 [Source:MGI Symbol;Acc:MGI:2183752]	protein_coding	1.18893	1.29549	1.35861
ENSMUSG00000000766	Oprm1	10	+	6758506	7038198	opioid receptor, mu 1 [Source:MGI Symbol;Acc:MGI:97441]	protein_coding	0.106293	0.0806129	0.0607272
ENSMUSG00000000776	Polr3d	14	-	70438757	70443447	polymerase (RNA) III (DNA directed) polypeptide D [Source:MGI Symbol;Acc:MGI:1914315]	protein_coding	0.29017	0.398749	0.411797
ENSMUSG00000000782	Tcf7	11	-	52252371	52283331	transcription factor 7, T cell specific [Source:MGI Symbol;Acc:MGI:98507]	protein_coding	0.154407	0.162042	0.169325
ENSMUSG00000000787	Ddx3x	X	+	13280970	13294052	DEAD/H (Asp-Glu-Ala-Asp/His) box polypeptide 3, X-linked [Source:MGI Symbol;Acc:MGI:103064]	protein_coding	28.154	24.0809	22.1388
ENSMUSG00000000791	Il12rb1	8	+	70808449	70821424	interleukin 12 receptor, beta 1 [Source:MGI Symbol;Acc:MGI:104579]	protein_coding	0.0017996	-0.0161166	0.0145548
ENSMUSG00000000792	Slc5a5	8	-	70882889	70892757	solute carrier family 5 (sodium iodide symporter), member 5 [Source:MGI Symbol;Acc:MGI:2149330]	protein_coding	0.09098	0.0766787	0.0640334
ENSMUSG00000000794	Kcnn3	3	+	89520164	89675132	potassium intermediate/small conductance calcium-activated channel, subfamily N, member 3 [Source:MGI Symbol;Acc:MGI:2153183]	protein_coding	1.38682	1.3468	1.32387
ENSMUSG00000000804	Usp32	11	-	84984442	85140161	ubiquitin specific peptidase 32 [Source:MGI Symbol;Acc:MGI:2144475]	protein_coding	1.49864	1.7079	1.79008
ENSMUSG00000000805	Car4	11	+	84957786	84966044	carbonic anhydrase 4 [Source:MGI Symbol;Acc:MGI:1096574]	protein_coding	53.12	53.1527	53.4546
ENSMUSG00000000811	Txnrd3	6	+	89643988	89675529	thioredoxin reductase 3 [Source:MGI Symbol;Acc:MGI:2386711]	protein_coding	0.190743	0.204827	0.214856
ENSMUSG00000000817	Fasl	1	-	161780689	161788495	Fas ligand (TNF superfamily, member 6) [Source:MGI Symbol;Acc:MGI:99255]	protein_coding	0.131378	0.0399482	-0.00589796
ENSMUSG00000000823	Zfp512b	2	-	181582103	181592803	zinc finger protein 512B [Source:MGI Symbol;Acc:MGI:2685478]	protein_coding	0.242593	0.274652	0.275523
ENSMUSG00000000826	Dnajc5	2	+	181520485	181555133	DnaJ heat shock protein family (Hsp40) member C5 [Source:MGI Symbol;Acc:MGI:892995]	protein_coding	5.78806	6.01395	6.13404
ENSMUSG00000000827	Tpd52l2	2	+	181497142	181517966	tumor protein D52-like 2 [Source:MGI Symbol;Acc:MGI:1913564]	protein_coding	31.9721	33.407	33.2247
ENSMUSG00000000838	Fmr1	X	+	68678541	68717963	fragile X mental retardation 1 [Source:MGI Symbol;Acc:MGI:95564]	protein_coding	3.08938	3.048	3.01411
ENSMUSG00000000861	Bcl11a	11	+	24078056	24174123	B cell CLL/lymphoma 11A (zinc finger protein) [Source:MGI Symbol;Acc:MGI:106190]	protein_coding	2.88361	2.96179	3.01379
ENSMUSG00000000869	Il4	11	-	53602982	53618669	interleukin 4 [Source:MGI Symbol;Acc:MGI:96556]	protein_coding	-0.0266882	-0.00786583	0.0355655
ENSMUSG00000000876	Pxmp4	2	-	154585758	154603708	peroxisomal membrane protein 4 [Source:MGI Symbol;Acc:MGI:1891701]	protein_coding	7.9742	7.67683	7.4037
ENSMUSG00000000881	Dlg3	X	+	100767722	100818410	discs large MAGUK scaffold protein 3 [Source:MGI Symbol;Acc:MGI:1888986]	protein_coding	0.180441	0.203527	0.204871
ENSMUSG00000000884	Gnb1l	16	+	18498713	18566679	guanine nucleotide binding protein (G protein), beta polypeptide 1-like [Source:MGI Symbol;Acc:MGI:1338057]	protein_coding	-0.0170009	0.06924	0.0828623
ENSMUSG00000000889	Dbh	2	+	27165233	27183200	dopamine beta hydroxylase [Source:MGI Symbol;Acc:MGI:94864]	protein_coding	0.0198461	0.0104592	0.00373617
ENSMUSG00000000901	Mmp11	10	-	75923222	75936496	matrix metallopeptidase 11 [Source:MGI Symbol;Acc:MGI:97008]	protein_coding	0.0869377	0.114746	0.129263
ENSMUSG00000000902	Smarcb1	10	-	75896769	75921617	SWI/SNF related, matrix associated, actin dependent regulator of chromatin, subfamily b, member 1 [Source:MGI Symbol;Acc:MGI:1328366]	protein_coding	2.57609	2.11953	1.90324
ENSMUSG00000000903	Vpreb3	10	+	75943057	75949657	pre-B lymphocyte gene 3 [Source:MGI Symbol;Acc:MGI:98938]	protein_coding	4.63736	4.66629	4.64359
ENSMUSG00000000915	Hip1r	5	+	123973628	124005558	huntingtin interacting protein 1 related [Source:MGI Symbol;Acc:MGI:1352504]	protein_coding	1.35687	1.24466	1.19201
ENSMUSG00000000916	Nsun5	5	+	135369953	135376805	NOL1/NOP2/Sun domain family, member 5 [Source:MGI Symbol;Acc:MGI:2140844]	protein_coding	1.33388	1.32945	1.41058
ENSMUSG00000000934	Top1mt	15	-	75657035	75678800	DNA topoisomerase 1, mitochondrial [Source:MGI Symbol;Acc:MGI:1920210]	protein_coding	0.0402807	0.0522289	0.0602812
ENSMUSG00000000938	Hoxa10	6	-	52231197	52240854	homeobox A10 [Source:MGI Symbol;Acc:MGI:96171]	protein_coding	0.100215	0.0960644	0.101075
ENSMUSG00000000942	Hoxa4	6	-	52189671	52191753	homeobox A4 [Source:MGI Symbol;Acc:MGI:96176]	protein_coding	0.0271122	0.0277286	0.0266168
ENSMUSG00000000948	Gm38393	7	-	59974149	60005064	predicted gene, 38393 [Source:MGI Symbol;Acc:MGI:5613898]	protein_coding	0.0479754	0.0371818	0.0229353
ENSMUSG00000000957	Mmp14	14	+	54431612	54445364	matrix metallopeptidase 14 (membrane-inserted) [Source:MGI Symbol;Acc:MGI:101900]	protein_coding	0.786303	0.836764	0.873524
ENSMUSG00000000958	Slc7a7	14	-	54369442	54417780	solute carrier family 7 (cationic amino acid transporter, y+ system), member 7 [Source:MGI Symbol;Acc:MGI:1337120]	protein_coding	10.5501	10.7968	10.6707
ENSMUSG00000000959	Oxa1l	14	+	54360834	54369673	oxidase assembly 1-like [Source:MGI Symbol;Acc:MGI:1916339]	protein_coding	2.94606	3.04065	3.1969
ENSMUSG00000000976	Heatr6	11	+	83753696	83783754	HEAT repeat containing 6 [Source:MGI Symbol;Acc:MGI:1919790]	protein_coding	0.848784	0.91191	0.963411
ENSMUSG00000000982	Ccl3	11	-	83647844	83649355	chemokine (C-C motif) ligand 3 [Source:MGI Symbol;Acc:MGI:98260]	protein_coding	45.5745	46.5206	46.9059
ENSMUSG00000000983	Wfdc18	11	+	83709015	83711348	WAP four-disulfide core domain 18 [Source:MGI Symbol;Acc:MGI:107506]	protein_coding	-0.00398932	0.00296573	0.0010365
ENSMUSG00000001014	Icam4	9	+	21029373	21030595	intercellular adhesion molecule 4, Landsteiner-Wiener blood group [Source:MGI Symbol;Acc:MGI:1925619]	protein_coding	-0.0533616	0.0104799	0.0454137
ENSMUSG00000001016	Ilf2	3	+	90476126	90488379	interleukin enhancer binding factor 2 [Source:MGI Symbol;Acc:MGI:1915031]	protein_coding	12.4188	12.2478	12.2066
ENSMUSG00000001017	Chtop	3	-	90498956	90509498	chromatin target of PRMT1 [Source:MGI Symbol;Acc:MGI:1913761]	protein_coding	4.65343	4.99443	5.24726
ENSMUSG00000001018	Snapin	3	-	90488026	90491033	SNAP-associated protein [Source:MGI Symbol;Acc:MGI:1333745]	protein_coding	2.09914	1.96863	1.88804
ENSMUSG00000001020	S100a4	3	+	90603771	90606045	S100 calcium binding protein A4 [Source:MGI Symbol;Acc:MGI:1330282]	protein_coding	340.951	386.699	413.502
ENSMUSG00000001021	S100a3	3	+	90584659	90602702	S100 calcium binding protein A3 [Source:MGI Symbol;Acc:MGI:1338849]	protein_coding	0.0677819	0.052868	0.0495416
ENSMUSG00000001023	S100a5	3	+	90608523	90611780	S100 calcium binding protein A5 [Source:MGI Symbol;Acc:MGI:1338915]	protein_coding	-0.040743	0.00751326	0.0346995
ENSMUSG00000001025	S100a6	3	+	90612882	90624181	S100 calcium binding protein A6 (calcyclin) [Source:MGI Symbol;Acc:MGI:1339467]	protein_coding	1493.98	1491.69	1488.86
ENSMUSG00000001027	Scn4a	11	-	106318592	106353288	sodium channel, voltage-gated, type IV, alpha [Source:MGI Symbol;Acc:MGI:98250]	protein_coding	0.172578	0.128317	0.104186
ENSMUSG00000001029	Icam2	11	-	106377656	106388075	intercellular adhesion molecule 2 [Source:MGI Symbol;Acc:MGI:96394]	protein_coding	0.194557	0.124127	0.0776879
ENSMUSG00000001034	Mapk7	11	-	61488812	61494406	mitogen-activated protein kinase 7 [Source:MGI Symbol;Acc:MGI:1346347]	protein_coding	0.112978	0.105636	0.100552
ENSMUSG00000001036	Epn2	11	-	61517249	61579687	epsin 2 [Source:MGI Symbol;Acc:MGI:1333766]	protein_coding	0.346249	0.331228	0.314947
ENSMUSG00000001039	B9d1	11	+	61505144	61512931	B9 protein domain 1 [Source:MGI Symbol;Acc:MGI:1351471]	protein_coding	0.518211	0.506695	0.489449
ENSMUSG00000001052	Sec24b	3	-	129982759	130061553	Sec24 related gene family, member B (S. cerevisiae) [Source:MGI Symbol;Acc:MGI:2139764]	protein_coding	5.54308	5.94012	5.97863
ENSMUSG00000001053	N4bp3	11	-	51643063	51650842	NEDD4 binding protein 3 [Source:MGI Symbol;Acc:MGI:2442218]	protein_coding	1.37821	1.60173	1.64468
ENSMUSG00000001054	Rmnd5b	11	-	51623671	51635896	required for meiotic nuclear division 5 homolog B [Source:MGI Symbol;Acc:MGI:1913339]	protein_coding	18.7158	18.514	18.2323
ENSMUSG00000001056	Nhp2	11	+	51619735	51623714	NHP2 ribonucleoprotein [Source:MGI Symbol;Acc:MGI:1098547]	protein_coding	240.56	215.374	200.292
ENSMUSG00000001062	Vps9d1	8	-	123242356	123254348	VPS9 domain containing 1 [Source:MGI Symbol;Acc:MGI:1914143]	protein_coding	0.313792	0.347927	0.353929
ENSMUSG00000001065	Zfp276	8	+	123254195	123269745	zinc finger protein (C2H2 type) 276 [Source:MGI Symbol;Acc:MGI:1888495]	protein_coding	0.922871	0.884841	0.85715
ENSMUSG00000001076	C1ql4	15	-	99084086	99087817	complement component 1, q subcomponent-like 4 [Source:MGI Symbol;Acc:MGI:3579909]	protein_coding	0.015315	-0.00285683	-0.0122622
ENSMUSG00000001082	Mfsd10	5	-	34633642	34637212	major facilitator superfamily domain containing 10 [Source:MGI Symbol;Acc:MGI:1915544]	protein_coding	1.79957	2.17595	2.35575
ENSMUSG00000001089	Luzp1	4	+	136469761	136554780	leucine zipper protein 1 [Source:MGI Symbol;Acc:MGI:107629]	protein_coding	0.564261	0.55132	0.539372
ENSMUSG00000001095	Slc13a2	11	-	78397087	78422217	solute carrier family 13 (sodium-dependent dicarboxylate transporter), member 2 [Source:MGI Symbol;Acc:MGI:1276558]	protein_coding	2.68563	2.68341	2.67505
ENSMUSG00000001098	Kctd10	5	-	114363567	114380508	potassium channel tetramerisation domain containing 10 [Source:MGI Symbol;Acc:MGI:2141207]	protein_coding	2.12787	2.40275	2.45111
ENSMUSG00000001100	Poldip2	11	+	78512193	78522736	polymerase (DNA-directed), delta interacting protein 2 [Source:MGI Symbol;Acc:MGI:1915061]	protein_coding	0.631571	0.733025	0.765484
ENSMUSG00000001103	Sebox	11	+	78503447	78505081	SEBOX homeobox [Source:MGI Symbol;Acc:MGI:108012]	protein_coding	0.167914	0.157121	0.143983
ENSMUSG00000001105	Ift20	11	+	78536361	78541737	intraflagellar transport 20 [Source:MGI Symbol;Acc:MGI:1915585]	protein_coding	14.9064	13.2255	12.3845
ENSMUSG00000001119	Col6a1	10	-	76708792	76726168	collagen, type VI, alpha 1 [Source:MGI Symbol;Acc:MGI:88459]	protein_coding	0.339261	0.378379	0.405684
ENSMUSG00000001120	Pcbp3	10	-	76761857	76961887	poly(rC) binding protein 3 [Source:MGI Symbol;Acc:MGI:1890470]	protein_coding	0.279129	0.301336	0.302031
ENSMUSG00000001123	Lgals9	11	-	78962974	78984946	lectin, galactose binding, soluble 9 [Source:MGI Symbol;Acc:MGI:109496]	protein_coding	8.77412	8.26294	8.18526
ENSMUSG00000001127	Araf	X	+	20797814	20860519	Araf proto-oncogene, serine/threonine kinase [Source:MGI Symbol;Acc:MGI:88065]	protein_coding	2.94222	3.16839	3.28614
ENSMUSG00000001128	Cfp	X	-	20925454	20931555	complement factor properdin [Source:MGI Symbol;Acc:MGI:97545]	protein_coding	25.9888	25.5264	25.222
ENSMUSG00000001131	Timp1	X	+	20870166	20874735	tissue inhibitor of metalloproteinase 1 [Source:MGI Symbol;Acc:MGI:98752]	protein_coding	0.0125297	-0.00226029	-0.0101373
ENSMUSG00000001134	Uxt	X	-	20941722	20962017	ubiquitously expressed prefoldin like chaperone [Source:MGI Symbol;Acc:MGI:1277988]	protein_coding	1.92388	1.87425	1.81357
ENSMUSG00000001138	Cnnm3	1	+	36511867	36528237	cyclin M3 [Source:MGI Symbol;Acc:MGI:2151055]	protein_coding	3.43891	3.53142	3.52431
ENSMUSG00000001143	Lman2l	1	-	36419871	36445271	lectin, mannose-binding 2-like [Source:MGI Symbol;Acc:MGI:2443010]	protein_coding	1.70577	1.62568	1.60804
ENSMUSG00000001150	Mcm3ap	10	+	76468927	76515857	minichromosome maintenance complex component 3 associated protein [Source:MGI Symbol;Acc:MGI:1930089]	protein_coding	23.7851	24.3441	24.2298
ENSMUSG00000001151	Pcnt	10	-	76351263	76442786	pericentrin (kendrin) [Source:MGI Symbol;Acc:MGI:102722]	protein_coding	2.9827	2.51779	2.32953
ENSMUSG00000001155	Ftcd	10	+	76575648	76590338	formiminotransferase cyclodeaminase [Source:MGI Symbol;Acc:MGI:1339962]	protein_coding	0.0780829	0.0556412	0.0420847
ENSMUSG00000001156	Mxd1	6	-	86647042	86669161	MAX dimerization protein 1 [Source:MGI Symbol;Acc:MGI:96908]	protein_coding	82.7917	81.6712	81.2915
ENSMUSG00000001157	Gmcl1	6	-	86691768	86733383	germ cell-less, spermatogenesis associated 1 [Source:MGI Symbol;Acc:MGI:1345156]	protein_coding	15.9334	15.3592	15.3992
ENSMUSG00000001158	Snrnp27	6	-	86675151	86684522	small nuclear ribonucleoprotein 27 (U4/U6.U5) [Source:MGI Symbol;Acc:MGI:1913868]	protein_coding	42.8967	38.9339	37.8189
ENSMUSG00000001166	Oas1c	5	-	120800194	120812514	2'-5' oligoadenylate synthetase 1C [Source:MGI Symbol;Acc:MGI:2149633]	protein_coding	1.94908	1.92171	1.93347
ENSMUSG00000001168	Oas1h	5	+	120861421	120873506	2'-5' oligoadenylate synthetase 1H [Source:MGI Symbol;Acc:MGI:2180853]	protein_coding	0.577662	0.521946	0.536002
ENSMUSG00000001173	Ocrl	X	+	47912387	47965868	OCRL, inositol polyphosphate-5-phosphatase [Source:MGI Symbol;Acc:MGI:109589]	protein_coding	1.33218	1.33911	1.3576
ENSMUSG00000001175	Calm1	12	+	100199435	100209814	calmodulin 1 [Source:MGI Symbol;Acc:MGI:88251]	protein_coding	268.148	231.517	215.364
ENSMUSG00000001211	Agpat3	10	-	78269178	78352489	1-acylglycerol-3-phosphate O-acyltransferase 3 [Source:MGI Symbol;Acc:MGI:1336186]	protein_coding	0.63496	0.687535	0.709334
ENSMUSG00000001225	Slc26a3	12	+	31390871	31473917	solute carrier family 26, member 3 [Source:MGI Symbol;Acc:MGI:107181]	protein_coding	0.719117	0.643948	0.62293
ENSMUSG00000001227	Sema6b	17	-	56123085	56140343	sema domain, transmembrane domain (TM), and cytoplasmic domain, (semaphorin) 6B [Source:MGI Symbol;Acc:MGI:1202889]	protein_coding	1.05881	1.04528	1.01926
ENSMUSG00000001228	Uhrf1	17	+	56303321	56323486	ubiquitin-like, containing PHD and RING finger domains, 1 [Source:MGI Symbol;Acc:MGI:1338889]	protein_coding	5.58928	5.13005	4.83139
ENSMUSG00000001229	Dpp9	17	-	56186807	56218905	dipeptidylpeptidase 9 [Source:MGI Symbol;Acc:MGI:2443967]	protein_coding	1.47087	1.35828	1.3057
ENSMUSG00000001240	Ramp2	11	+	101246028	101259546	receptor (calcitonin) activity modifying protein 2 [Source:MGI Symbol;Acc:MGI:1859650]	protein_coding	0.598808	0.599894	0.587826
ENSMUSG00000001247	Lsr	7	-	30957770	30973464	lipolysis stimulated lipoprotein receptor [Source:MGI Symbol;Acc:MGI:1927471]	protein_coding	1.65504	1.71853	1.75735
ENSMUSG00000001248	Gramd1a	7	-	31130127	31155896	GRAM domain containing 1A [Source:MGI Symbol;Acc:MGI:105490]	protein_coding	5.97727	6.3555	6.56298
ENSMUSG00000001249	Hpn	7	-	31098725	31115290	hepsin [Source:MGI Symbol;Acc:MGI:1196620]	protein_coding	3.19605	3.23878	3.28452
ENSMUSG00000001260	Gabrg1	5	-	70751047	70842617	gamma-aminobutyric acid (GABA) A receptor, subunit gamma 1 [Source:MGI Symbol;Acc:MGI:103156]	protein_coding	0.183886	0.169225	0.180097
ENSMUSG00000001270	Ckb	12	-	111669361	111672338	creatine kinase, brain [Source:MGI Symbol;Acc:MGI:88407]	protein_coding	3.40259	4.22943	4.66726
ENSMUSG00000001280	Sp1	15	+	102406143	102436404	trans-acting transcription factor 1 [Source:MGI Symbol;Acc:MGI:98372]	protein_coding	11.7249	11.5796	11.5913
ENSMUSG00000001281	Itgb7	15	-	102215995	102231944	integrin beta 7 [Source:MGI Symbol;Acc:MGI:96616]	protein_coding	6.4206	6.30975	6.35895
ENSMUSG00000001285	Myg1	15	+	102331709	102338139	melanocyte proliferating gene 1 [Source:MGI Symbol;Acc:MGI:1929864]	protein_coding	19.5828	19.0641	18.9266
ENSMUSG00000001288	Rarg	15	-	102234938	102257517	retinoic acid receptor, gamma [Source:MGI Symbol;Acc:MGI:97858]	protein_coding	0.956806	1.04144	1.07334
ENSMUSG00000001289	Pfdn5	15	+	102326116	102331873	prefoldin 5 [Source:MGI Symbol;Acc:MGI:1928753]	protein_coding	369.607	316.994	294.465
ENSMUSG00000001300	Efnb2	8	-	8617434	8661242	ephrin B2 [Source:MGI Symbol;Acc:MGI:105097]	protein_coding	0.20277	0.175326	0.162572
ENSMUSG00000001305	Rrp15	1	-	186720978	186749358	ribosomal RNA processing 15 homolog (S. cerevisiae) [Source:MGI Symbol;Acc:MGI:1914473]	protein_coding	0.542881	0.705808	0.813922
ENSMUSG00000001313	Rnd2	11	+	101464999	101471853	Rho family GTPase 2 [Source:MGI Symbol;Acc:MGI:1338755]	protein_coding	0.544554	0.567769	0.568206
ENSMUSG00000001323	Srr	11	-	74906359	74925948	serine racemase [Source:MGI Symbol;Acc:MGI:1351636]	protein_coding	0.442936	0.393217	0.376008
ENSMUSG00000001333	Sync	4	+	129287617	129308559	syncoilin [Source:MGI Symbol;Acc:MGI:1916078]	protein_coding	0.0746322	0.0625635	0.0504657
ENSMUSG00000001334	Fndc5	4	+	129136999	129144593	fibronectin type III domain containing 5 [Source:MGI Symbol;Acc:MGI:1917614]	protein_coding	0.165639	0.167114	0.151928
ENSMUSG00000001348	Acp5	9	-	22126727	22135711	acid phosphatase 5, tartrate resistant [Source:MGI Symbol;Acc:MGI:87883]	protein_coding	27.0334	26.7368	27.2141
ENSMUSG00000001349	Cnn1	9	+	22099216	22109630	calponin 1 [Source:MGI Symbol;Acc:MGI:104979]	protein_coding	0.2165	0.261215	0.282688
ENSMUSG00000001366	Fbxo9	9	-	78081499	78109065	f-box protein 9 [Source:MGI Symbol;Acc:MGI:1918788]	protein_coding	17.8697	19.2481	19.8029
ENSMUSG00000001376	Vps50	6	+	3498382	3603531	VPS50 EARP/GARPII complex subunit [Source:MGI Symbol;Acc:MGI:1920538]	protein_coding	1.8203	1.71811	1.66248
ENSMUSG00000001380	Hars	18	-	36766528	36783205	histidyl-tRNA synthetase [Source:MGI Symbol;Acc:MGI:108087]	protein_coding	3.75541	4.06015	4.09007
ENSMUSG00000001383	Zmat2	18	+	36793876	36799666	zinc finger, matrin type 2 [Source:MGI Symbol;Acc:MGI:1913742]	protein_coding	19.3647	22.0907	23.4173
ENSMUSG00000001403	Ube2c	2	+	164769898	164778822	ubiquitin-conjugating enzyme E2C [Source:MGI Symbol;Acc:MGI:1915862]	protein_coding	11.8206	12.8711	13.4844
ENSMUSG00000001415	Smg5	3	+	88336260	88362338	Smg-5 homolog, nonsense mediated mRNA decay factor (C. elegans) [Source:MGI Symbol;Acc:MGI:2447364]	protein_coding	2.02509	2.07876	2.05029
ENSMUSG00000001416	Cct3	3	+	88297116	88321767	chaperonin containing Tcp1, subunit 3 (gamma) [Source:MGI Symbol;Acc:MGI:104708]	protein_coding	11.3519	11.1633	11.1337
ENSMUSG00000001418	Glmp	3	+	88325023	88331313	glycosylated lysosomal membrane protein [Source:MGI Symbol;Acc:MGI:1913318]	protein_coding	20.8077	20.4522	20.5168
ENSMUSG00000001419	Mef2d	3	+	88142372	88172086	myocyte enhancer factor 2D [Source:MGI Symbol;Acc:MGI:99533]	protein_coding	1.7969	1.594	1.51119
ENSMUSG00000001420	Tmem79	3	-	88328655	88336148	transmembrane protein 79 [Source:MGI Symbol;Acc:MGI:1919163]	protein_coding	0.807334	0.74431	0.74834
ENSMUSG00000001424	Snd1	6	+	28475139	28935162	staphylococcal nuclease and tudor domain containing 1 [Source:MGI Symbol;Acc:MGI:1929266]	protein_coding	1.9228	2.03663	2.10443
ENSMUSG00000001435	Col18a1	10	-	77052178	77166548	collagen, type XVIII, alpha 1 [Source:MGI Symbol;Acc:MGI:88451]	protein_coding	0.207007	0.209114	0.208862
ENSMUSG00000001436	Slc19a1	10	+	77032241	77061002	solute carrier family 19 (folate transporter), member 1 [Source:MGI Symbol;Acc:MGI:103182]	protein_coding	0.285993	0.336129	0.357742
ENSMUSG00000001440	Kpnb1	11	-	97159714	97187881	karyopherin (importin) beta 1 [Source:MGI Symbol;Acc:MGI:107532]	protein_coding	20.0579	20.116	20.3366
ENSMUSG00000001441	Npepps	11	-	97205842	97280638	aminopeptidase puromycin sensitive [Source:MGI Symbol;Acc:MGI:1101358]	protein_coding	11.1025	11.2373	11.055
ENSMUSG00000001444	Tbx21	11	-	97098071	97115331	T-box 21 [Source:MGI Symbol;Acc:MGI:1888984]	protein_coding	0.0604569	0.0281209	0.0133976
ENSMUSG00000001445	Mrpl10	11	+	97041560	97049213	mitochondrial ribosomal protein L10 [Source:MGI Symbol;Acc:MGI:1333801]	protein_coding	5.43231	5.19991	5.17073
ENSMUSG00000001467	Cyp51	5	-	4081145	4104746	cytochrome P450, family 51 [Source:MGI Symbol;Acc:MGI:106040]	protein_coding	11.1227	10.6371	10.2591
ENSMUSG00000001472	Tcf25	8	+	123373753	123403835	transcription factor 25 (basic helix-loop-helix) [Source:MGI Symbol;Acc:MGI:1914105]	protein_coding	58.7153	49.4363	45.2137
ENSMUSG00000001473	Tubb6	18	+	67390717	67402749	tubulin, beta 6 class V [Source:MGI Symbol;Acc:MGI:1915201]	protein_coding	17.6599	17.3782	17.4432
ENSMUSG00000001482	Def8	8	+	123423527	123463270	differentially expressed in FDCP 8 [Source:MGI Symbol;Acc:MGI:1346331]	protein_coding	0.730703	0.840134	0.87142
ENSMUSG00000001493	Meox1	11	-	101877510	101894374	mesenchyme homeobox 1 [Source:MGI Symbol;Acc:MGI:103220]	protein_coding	0.0930354	0.107748	0.115115
ENSMUSG00000001494	Sost	11	-	101962458	101967015	sclerostin [Source:MGI Symbol;Acc:MGI:1921749]	protein_coding	0.0705042	0.043214	0.026342
ENSMUSG00000001496	Nkx2-1	12	-	56531958	56536908	NK2 homeobox 1 [Source:MGI Symbol;Acc:MGI:108067]	protein_coding	0.0112046	0.019114	0.0193932
ENSMUSG00000001497	Pax9	12	+	56691767	56712822	paired box 9 [Source:MGI Symbol;Acc:MGI:97493]	protein_coding	0.0187989	0.0289522	0.0327738
ENSMUSG00000001504	Irx2	13	+	72628820	72634198	Iroquois homeobox 2 [Source:MGI Symbol;Acc:MGI:1197526]	protein_coding	0.0610878	0.0416875	0.0267447
ENSMUSG00000001506	Col1a1	11	+	94936224	94953042	collagen, type I, alpha 1 [Source:MGI Symbol;Acc:MGI:88467]	protein_coding	0.229521	0.153028	0.15264
ENSMUSG00000001507	Itga3	11	-	95044474	95076801	integrin alpha 3 [Source:MGI Symbol;Acc:MGI:96602]	protein_coding	0.683739	0.704716	0.712565
ENSMUSG00000001508	Sgca	11	-	94962791	94976327	sarcoglycan, alpha (dystrophin-associated glycoprotein) [Source:MGI Symbol;Acc:MGI:894698]	protein_coding	0.178358	0.169562	0.158812
ENSMUSG00000001510	Dlx3	11	+	95120119	95125296	distal-less homeobox 3 [Source:MGI Symbol;Acc:MGI:94903]	protein_coding	0.0845836	0.0432027	0.0445549
ENSMUSG00000001517	Foxm1	6	+	128362967	128376146	forkhead box M1 [Source:MGI Symbol;Acc:MGI:1347487]	protein_coding	10.6434	10.5118	10.472
ENSMUSG00000001518	Itfg2	6	-	128409444	128424931	integrin alpha FG-GAP repeat containing 2 [Source:MGI Symbol;Acc:MGI:1915450]	protein_coding	0.104796	0.0797455	0.0808227
ENSMUSG00000001520	Nrip2	6	+	128399296	128416427	nuclear receptor interacting protein 2 [Source:MGI Symbol;Acc:MGI:1891884]	protein_coding	0.0630736	0.0544413	0.0424268
ENSMUSG00000001521	Tulp3	6	-	128321161	128355851	tubby-like protein 3 [Source:MGI Symbol;Acc:MGI:1329045]	protein_coding	0.280878	0.295645	0.284762
ENSMUSG00000001524	Gtf2h4	17	-	35667730	35673739	general transcription factor II H, polypeptide 4 [Source:MGI Symbol;Acc:MGI:1338799]	protein_coding	0.2362	0.267188	0.218403
ENSMUSG00000001525	Tubb5	17	-	35833921	35838306	tubulin, beta 5 class I [Source:MGI Symbol;Acc:MGI:107812]	protein_coding	423.759	410.889	403.427
ENSMUSG00000001542	Ell2	13	+	75706757	75772364	elongation factor RNA polymerase II 2 [Source:MGI Symbol;Acc:MGI:2183438]	protein_coding	1.49915	1.48693	1.51167
ENSMUSG00000001552	Jup	11	-	100368958	100397763	junction plakoglobin [Source:MGI Symbol;Acc:MGI:96650]	protein_coding	2.75604	2.76851	2.67613
ENSMUSG00000001555	Fkbp10	11	+	100415697	100424824	FK506 binding protein 10 [Source:MGI Symbol;Acc:MGI:104769]	protein_coding	0.26095	0.0626211	-0.0282177
ENSMUSG00000001558	Klhl10	11	+	100441917	100457022	kelch-like 10 [Source:MGI Symbol;Acc:MGI:2181067]	protein_coding	0.00554572	-0.000330178	-0.00518666
ENSMUSG00000001566	Mnx1	5	-	29473034	29478470	motor neuron and pancreas homeobox 1 [Source:MGI Symbol;Acc:MGI:109160]	protein_coding	0.0138273	-0.00255178	-0.0111153
ENSMUSG00000001569	Nom1	5	+	29434664	29457843	nucleolar protein with MIF4G domain 1 [Source:MGI Symbol;Acc:MGI:1861749]	protein_coding	1.91754	1.95557	1.98749
ENSMUSG00000001576	Ergic1	17	+	26561489	26656934	endoplasmic reticulum-golgi intermediate compartment (ERGIC) 1 [Source:MGI Symbol;Acc:MGI:1914708]	protein_coding	1.86101	1.97432	1.99184
ENSMUSG00000001583	Tnk1	11	-	69851005	69858730	tyrosine kinase, non-receptor, 1 [Source:MGI Symbol;Acc:MGI:1930958]	protein_coding	0.184484	0.183015	0.168575
ENSMUSG00000001588	Acap1	11	-	69881567	69895539	ArfGAP with coiled-coil, ankyrin repeat and PH domains 1 [Source:MGI Symbol;Acc:MGI:2388270]	protein_coding	14.5175	16.5353	17.6164
ENSMUSG00000001604	Tcea3	4	+	136247729	136274898	transcription elongation factor A (SII), 3 [Source:MGI Symbol;Acc:MGI:1196908]	protein_coding	1.03524	0.982148	0.952229
ENSMUSG00000001622	Csn3	5	+	87925579	87932665	casein kappa [Source:MGI Symbol;Acc:MGI:107461]	protein_coding	0.09081	0.130392	0.128336
ENSMUSG00000001627	Ifrd1	12	-	40201567	40248504	interferon-related developmental regulator 1 [Source:MGI Symbol;Acc:MGI:1316717]	protein_coding	9.42503	9.64278	9.72263
ENSMUSG00000001630	Stk38l	6	+	146724995	146778812	serine/threonine kinase 38 like [Source:MGI Symbol;Acc:MGI:1922250]	protein_coding	0.141847	0.162864	0.178956
ENSMUSG00000001632	Brpf1	6	+	113307137	113324860	bromodomain and PHD finger containing, 1 [Source:MGI Symbol;Acc:MGI:1926033]	protein_coding	3.30079	3.48291	3.61955
ENSMUSG00000001642	Akr1b3	6	-	34302434	34317478	aldo-keto reductase family 1, member B3 (aldose reductase) [Source:MGI Symbol;Acc:MGI:1353494]	protein_coding	4.52928	4.97465	5.36499
ENSMUSG00000001655	Hoxc13	15	+	102921103	102928814	homeobox C13 [Source:MGI Symbol;Acc:MGI:99560]	protein_coding	0.0237662	0.028176	0.0370081
ENSMUSG00000001656	Hoxc11	15	+	102954427	102957708	homeobox C11 [Source:MGI Symbol;Acc:MGI:96193]	protein_coding	0.0819947	0.081441	0.0781189
ENSMUSG00000001657	Hoxc8	15	+	102990607	102994111	homeobox C8 [Source:MGI Symbol;Acc:MGI:96198]	protein_coding	0.137485	0.124717	0.105692
ENSMUSG00000001661	Hoxc6	15	+	102998257	103011881	homeobox C6 [Source:MGI Symbol;Acc:MGI:96197]	protein_coding	0.0969586	0.0427526	0.0202699
ENSMUSG00000001663	Gstt1	10	-	75783813	75798584	glutathione S-transferase, theta 1 [Source:MGI Symbol;Acc:MGI:107379]	protein_coding	1.03652	1.02532	1.01635
ENSMUSG00000001665	Gstt3	10	-	75774115	75781414	glutathione S-transferase, theta 3 [Source:MGI Symbol;Acc:MGI:2143526]	protein_coding	0.586529	0.631127	0.629596
ENSMUSG00000001666	Ddt	10	-	75771230	75773414	D-dopachrome tautomerase [Source:MGI Symbol;Acc:MGI:1298381]	protein_coding	1.98997	1.99186	1.97232
ENSMUSG00000001670	Tat	8	+	109990437	109999803	tyrosine aminotransferase [Source:MGI Symbol;Acc:MGI:98487]	protein_coding	0.478599	0.403517	0.363694
ENSMUSG00000001672	Marveld3	8	-	109947914	109962203	MARVEL (membrane-associating) domain containing 3 [Source:MGI Symbol;Acc:MGI:1920858]	protein_coding	0.659048	0.697232	0.689716
ENSMUSG00000001674	Ddx18	1	-	121553835	121567989	DEAD (Asp-Glu-Ala-Asp) box polypeptide 18 [Source:MGI Symbol;Acc:MGI:1914192]	protein_coding	5.0002	5.06687	5.09137
ENSMUSG00000001687	Ubl3	5	-	148504635	148552789	ubiquitin-like 3 [Source:MGI Symbol;Acc:MGI:1344373]	protein_coding	67.0678	67.9918	67.2948
ENSMUSG00000001700	Gramd3	18	+	56400337	56503792	GRAM domain containing 3 [Source:MGI Symbol;Acc:MGI:1914815]	protein_coding	1.09285	1.26902	1.339
ENSMUSG00000001707	Eef1e1	13	-	38644207	38659058	eukaryotic translation elongation factor 1 epsilon 1 [Source:MGI Symbol;Acc:MGI:1913393]	protein_coding	2.40434	2.59624	2.73754
ENSMUSG00000001729	Akt1	12	-	112653821	112674884	thymoma viral proto-oncogene 1 [Source:MGI Symbol;Acc:MGI:87986]	protein_coding	14.5785	15.1932	15.4997
ENSMUSG00000001739	Cldn15	5	+	136966616	136975858	claudin 15 [Source:MGI Symbol;Acc:MGI:1913103]	protein_coding	18.2155	19.5787	20.0375
ENSMUSG00000001741	Il16	7	-	83642825	83745726	interleukin 16 [Source:MGI Symbol;Acc:MGI:1270855]	protein_coding	11.5796	12.7492	13.5118
ENSMUSG00000001750	Tcirg1	19	-	3896050	3907133	T cell, immune regulator 1, ATPase, H+ transporting, lysosomal V0 protein A3 [Source:MGI Symbol;Acc:MGI:1350931]	protein_coding	9.32855	8.8767	8.73919
ENSMUSG00000001751	Naglu	11	+	101070012	101077672	alpha-N-acetylglucosaminidase (Sanfilippo disease IIIB) [Source:MGI Symbol;Acc:MGI:1351641]	protein_coding	0.446235	0.9122	1.17522
ENSMUSG00000001755	Coasy	11	+	101082565	101086619	Coenzyme A synthase [Source:MGI Symbol;Acc:MGI:1918993]	protein_coding	7.95964	6.83632	6.41491
ENSMUSG00000001761	Smo	6	+	29735503	29761365	smoothened, frizzled class receptor [Source:MGI Symbol;Acc:MGI:108075]	protein_coding	0.137111	0.155516	0.158094
ENSMUSG00000001763	Tspan33	6	+	29694222	29718559	tetraspanin 33 [Source:MGI Symbol;Acc:MGI:1919012]	protein_coding	1.74804	1.41794	1.28385
ENSMUSG00000001767	Crnkl1	2	-	145917479	145935014	crooked neck pre-mRNA splicing factor 1 [Source:MGI Symbol;Acc:MGI:1914127]	protein_coding	6.93679	7.06885	7.09056
ENSMUSG00000001768	Rin2	2	+	145675215	145887616	Ras and Rab interactor 2 [Source:MGI Symbol;Acc:MGI:1921280]	protein_coding	5.04398	4.65696	4.4901
ENSMUSG00000001773	Folh1	7	-	86718977	86775943	folate hydrolase 1 [Source:MGI Symbol;Acc:MGI:1858193]	protein_coding	0.056817	0.0320956	0.0402919
ENSMUSG00000001774	Chordc1	9	+	18292125	18317442	cysteine and histidine-rich domain (CHORD)-containing, zinc-binding protein 1 [Source:MGI Symbol;Acc:MGI:1914167]	protein_coding	0.572487	0.458745	0.401144
ENSMUSG00000001783	Rtcb	10	-	85938637	85957823	RNA 2',3'-cyclic phosphate and 5'-OH ligase [Source:MGI Symbol;Acc:MGI:106379]	protein_coding	4.28968	4.19211	4.10578
ENSMUSG00000001785	Pwp1	10	+	85829494	85889096	PWP1 homolog, endonuclein [Source:MGI Symbol;Acc:MGI:1914735]	protein_coding	3.29051	4.2164	4.60505
ENSMUSG00000001786	Fbxo7	10	+	86021972	86051873	F-box protein 7 [Source:MGI Symbol;Acc:MGI:1917004]	protein_coding	0.765685	0.698954	0.700794
ENSMUSG00000001794	Capns1	7	-	30186936	30198811	calpain, small subunit 1 [Source:MGI Symbol;Acc:MGI:88266]	protein_coding	133.667	135.493	136.546
ENSMUSG00000001802	Lrp3	7	-	35200027	35215498	low density lipoprotein receptor-related protein 3 [Source:MGI Symbol;Acc:MGI:3584516]	protein_coding	0.190213	0.151791	0.132789
ENSMUSG00000001804	Dsg4	18	+	20436175	20471821	desmoglein 4 [Source:MGI Symbol;Acc:MGI:2661061]	protein_coding	0.0229933	0.0220881	0.0248683
ENSMUSG00000001815	Evx2	2	-	74652991	74659557	even-skipped homeobox 2 [Source:MGI Symbol;Acc:MGI:95462]	protein_coding	0.0370422	0.0321878	0.0190104
ENSMUSG00000001819	Hoxd13	2	+	74668310	74671599	homeobox D13 [Source:MGI Symbol;Acc:MGI:96205]	protein_coding	-0.019312	0.00484555	0.0147752
ENSMUSG00000001823	Hoxd12	2	+	74675013	74677705	homeobox D12 [Source:MGI Symbol;Acc:MGI:96204]	protein_coding	0.0361078	0.0300868	0.0196931
ENSMUSG00000001827	Folr1	7	-	101858331	101870788	folate receptor 1 (adult) [Source:MGI Symbol;Acc:MGI:95568]	protein_coding	0.117979	0.149498	0.161576
ENSMUSG00000001829	Clpb	7	+	101663633	101795506	ClpB caseinolytic peptidase B [Source:MGI Symbol;Acc:MGI:1100517]	protein_coding	0.389578	0.389624	0.394408
ENSMUSG00000001833	Septin7	9	+	25252439	25308571	septin 7 [Source:MGI Symbol;Acc:MGI:1335094]	protein_coding	27.9195	28.2196	28.4352
ENSMUSG00000001844	Zdhhc4	5	-	143316489	143329256	zinc finger, DHHC domain containing 4 [Source:MGI Symbol;Acc:MGI:1920131]	protein_coding	0.830534	0.754266	0.738032
ENSMUSG00000001847	Rac1	5	-	143503634	143528036	Rac family small GTPase 1 [Source:MGI Symbol;Acc:MGI:97845]	protein_coding	72.3952	66.1428	63.7365
ENSMUSG00000001855	Nup214	2	+	31974436	32053975	nucleoporin 214 [Source:MGI Symbol;Acc:MGI:1095411]	protein_coding	4.18845	4.26052	4.23149
ENSMUSG00000001864	Aif1l	2	+	31950139	31973442	allograft inflammatory factor 1-like [Source:MGI Symbol;Acc:MGI:1919598]	protein_coding	0.150848	0.145673	0.139586
ENSMUSG00000001865	Cpa3	3	-	20215620	20242181	carboxypeptidase A3, mast cell [Source:MGI Symbol;Acc:MGI:88479]	protein_coding	0.744514	0.707653	0.713954
ENSMUSG00000001870	Ltbp1	17	+	75005568	75392512	latent transforming growth factor beta binding protein 1 [Source:MGI Symbol;Acc:MGI:109151]	protein_coding	0.236616	0.278943	0.279393
ENSMUSG00000001891	Ugp2	11	-	21321138	21371201	UDP-glucose pyrophosphorylase 2 [Source:MGI Symbol;Acc:MGI:2183447]	protein_coding	6.45714	6.71375	6.81159
ENSMUSG00000001901	Kcnh6	11	+	106008124	106034549	potassium voltage-gated channel, subfamily H (eag-related), member 6 [Source:MGI Symbol;Acc:MGI:2684139]	protein_coding	0.0396387	0.0215467	0.00740692
ENSMUSG00000001909	Trmt1	8	+	84686307	84699808	tRNA methyltransferase 1 [Source:MGI Symbol;Acc:MGI:1289155]	protein_coding	57.9363	54.358	53.318
ENSMUSG00000001910	Nacc1	8	-	84670479	84687902	nucleus accumbens associated 1, BEN and BTB (POZ) domain containing [Source:MGI Symbol;Acc:MGI:1914080]	protein_coding	1.95028	1.79676	1.71909
ENSMUSG00000001911	Nfix	8	-	84699876	84800344	nuclear factor I/X [Source:MGI Symbol;Acc:MGI:97311]	protein_coding	4.06445	4.32426	4.52069
ENSMUSG00000001918	Slc1a5	7	+	16781340	16798274	solute carrier family 1 (neutral amino acid transporter), member 5 [Source:MGI Symbol;Acc:MGI:105305]	protein_coding	11.6105	12.0851	12.6047
ENSMUSG00000001924	Uba1	X	+	20658326	20683179	ubiquitin-like modifier activating enzyme 1 [Source:MGI Symbol;Acc:MGI:98890]	protein_coding	37.6126	43.6175	46.4585
ENSMUSG00000001930	Vwf	6	+	125546774	125686679	Von Willebrand factor [Source:MGI Symbol;Acc:MGI:98941]	protein_coding	0.308616	0.261311	0.264852
ENSMUSG00000001942	Siae	9	+	37555698	37649655	sialic acid acetylesterase [Source:MGI Symbol;Acc:MGI:104803]	protein_coding	3.79464	3.97598	4.06622
ENSMUSG00000001943	Vsig2	9	+	37539255	37544205	V-set and immunoglobulin domain containing 2 [Source:MGI Symbol;Acc:MGI:1928009]	protein_coding	0.0535938	0.0676008	0.0735652
ENSMUSG00000001946	Esam	9	+	37528078	37538319	endothelial cell-specific adhesion molecule [Source:MGI Symbol;Acc:MGI:1916774]	protein_coding	0.191014	0.106066	0.066857
ENSMUSG00000001948	Spa17	9	-	37603290	37613722	sperm autoantigenic protein 17 [Source:MGI Symbol;Acc:MGI:1333778]	protein_coding	0.698928	0.787133	0.785789
ENSMUSG00000001962	Fam50a	X	+	74313033	74320149	family with sequence similarity 50, member A [Source:MGI Symbol;Acc:MGI:1351626]	protein_coding	5.5046	5.21703	4.99606
ENSMUSG00000001964	Emd	X	+	74254687	74261548	emerin [Source:MGI Symbol;Acc:MGI:108117]	protein_coding	12.0662	13.2373	13.6902
ENSMUSG00000001983	Taco1	11	+	106066061	106073612	translational activator of mitochondrially encoded cytochrome c oxidase I [Source:MGI Symbol;Acc:MGI:1917457]	protein_coding	0.117145	0.181628	0.178248
ENSMUSG00000001985	Grik3	4	+	125490700	125714173	glutamate receptor, ionotropic, kainate 3 [Source:MGI Symbol;Acc:MGI:95816]	protein_coding	0.0555186	0.0581275	0.0545366
ENSMUSG00000001986	Gria3	X	+	41400854	41678601	glutamate receptor, ionotropic, AMPA3 (alpha 3) [Source:MGI Symbol;Acc:MGI:95810]	protein_coding	2.42465	2.48586	2.50813
ENSMUSG00000001988	Npas1	7	-	16455721	16477728	neuronal PAS domain protein 1 [Source:MGI Symbol;Acc:MGI:109205]	protein_coding	0.0471017	0.0494682	0.0716508
ENSMUSG00000001995	Sipa1l2	8	-	125418063	125569808	signal-induced proliferation-associated 1 like 2 [Source:MGI Symbol;Acc:MGI:2676970]	protein_coding	3.17321	3.16593	3.22481
ENSMUSG00000001998	Ap4e1	2	+	127008717	127067909	adaptor-related protein complex AP-4, epsilon 1 [Source:MGI Symbol;Acc:MGI:1336993]	protein_coding	0.25506	0.238856	0.236781
ENSMUSG00000001999	Blvra	2	+	127070665	127097084	biliverdin reductase A [Source:MGI Symbol;Acc:MGI:88170]	protein_coding	11.9057	12.5043	12.7082
ENSMUSG00000002006	Pdzd4	X	-	73793359	73824969	PDZ domain containing 4 [Source:MGI Symbol;Acc:MGI:2443483]	protein_coding	0.110809	0.112408	0.104839
ENSMUSG00000002007	Srpk3	X	+	73774405	73778925	serine/arginine-rich protein specific kinase 3 [Source:MGI Symbol;Acc:MGI:1891338]	protein_coding	0.58859	0.569902	0.538204
ENSMUSG00000002010	Idh3g	X	-	73778963	73786897	isocitrate dehydrogenase 3 (NAD+), gamma [Source:MGI Symbol;Acc:MGI:1099463]	protein_coding	11.1471	12.5258	13.0872
ENSMUSG00000002012	Pnck	X	-	73655994	73660117	pregnancy upregulated non-ubiquitously expressed CaM kinase [Source:MGI Symbol;Acc:MGI:1347357]	protein_coding	0.183335	0.188718	0.18841
ENSMUSG00000002014	Ssr4	X	+	73787028	73790830	signal sequence receptor, delta [Source:MGI Symbol;Acc:MGI:1099464]	protein_coding	47.3217	38.6462	35.0261
ENSMUSG00000002015	Bcap31	X	-	73686178	73716175	B cell receptor associated protein 31 [Source:MGI Symbol;Acc:MGI:1350933]	protein_coding	211.928	198.947	195.233
ENSMUSG00000002017	Fam98a	17	-	75537086	75551946	family with sequence similarity 98, member A [Source:MGI Symbol;Acc:MGI:1919972]	protein_coding	1.57469	1.61369	1.64596
ENSMUSG00000002020	Ltbp2	12	-	84783212	84876532	latent transforming growth factor beta binding protein 2 [Source:MGI Symbol;Acc:MGI:99502]	protein_coding	-0.105883	0.0801142	0.18852
ENSMUSG00000002028	Kmt2a	9	-	44803355	44881296	lysine (K)-specific methyltransferase 2A [Source:MGI Symbol;Acc:MGI:96995]	protein_coding	2.43347	2.77873	2.97239
ENSMUSG00000002031	Ift46	9	+	44767908	44793447	intraflagellar transport 46 [Source:MGI Symbol;Acc:MGI:1923818]	protein_coding	0.945822	0.910294	0.886933
ENSMUSG00000002032	Tmem25	9	-	44793769	44799307	transmembrane protein 25 [Source:MGI Symbol;Acc:MGI:1918937]	protein_coding	0.0675918	0.088563	0.0972663
ENSMUSG00000002033	Cd3g	9	-	44969572	44980431	CD3 antigen, gamma polypeptide [Source:MGI Symbol;Acc:MGI:88333]	protein_coding	0.220031	0.332982	0.405095
ENSMUSG00000002043	Trappc6a	7	+	19508395	19516145	trafficking protein particle complex 6A [Source:MGI Symbol;Acc:MGI:1914341]	protein_coding	36.7906	37.1218	37.4221
ENSMUSG00000002052	Supt6	11	-	78206746	78245987	SPT6, histone chaperone and transcription elongation factor [Source:MGI Symbol;Acc:MGI:107726]	protein_coding	0.316133	0.468666	0.566766
ENSMUSG00000002055	Spag5	11	+	78301529	78322457	sperm associated antigen 5 [Source:MGI Symbol;Acc:MGI:1927470]	protein_coding	4.12519	4.18201	4.19369
ENSMUSG00000002057	Foxn1	11	-	78357577	78386558	forkhead box N1 [Source:MGI Symbol;Acc:MGI:102949]	protein_coding	0.00340785	0.0142319	0.0190754
ENSMUSG00000002058	Unc119	11	+	78343482	78349164	unc-119 lipid binding chaperone [Source:MGI Symbol;Acc:MGI:1328357]	protein_coding	15.7232	16.38	16.4575
ENSMUSG00000002059	Rab34	11	+	78188430	78192193	RAB34, member RAS oncogene family [Source:MGI Symbol;Acc:MGI:104606]	protein_coding	9.37477	9.52478	9.49096
ENSMUSG00000002064	Sdf2	11	+	78245746	78255496	stromal cell derived factor 2 [Source:MGI Symbol;Acc:MGI:108019]	protein_coding	3.09908	3.14754	3.24577
ENSMUSG00000002068	Ccne1	7	-	38097984	38107534	cyclin E1 [Source:MGI Symbol;Acc:MGI:88316]	protein_coding	2.66577	2.93201	2.96256
ENSMUSG00000002076	Hsf2bp	17	-	31944769	32036349	heat shock transcription factor 2 binding protein [Source:MGI Symbol;Acc:MGI:1921627]	protein_coding	0.0443878	0.0389331	0.0313736
ENSMUSG00000002083	Bbc3	7	+	16308393	16318205	BCL2 binding component 3 [Source:MGI Symbol;Acc:MGI:2181667]	protein_coding	2.9088	2.81173	2.7082
ENSMUSG00000002100	Mybpc3	2	+	91118144	91136516	myosin binding protein C, cardiac [Source:MGI Symbol;Acc:MGI:102844]	protein_coding	0.042352	0.0545773	0.0611892
ENSMUSG00000002102	Psmc3	2	+	91054009	91066369	proteasome (prosome, macropain) 26S subunit, ATPase 3 [Source:MGI Symbol;Acc:MGI:1098754]	protein_coding	117.03	103.704	97.1863
ENSMUSG00000002103	Acp2	2	+	91202885	91214098	acid phosphatase 2, lysosomal [Source:MGI Symbol;Acc:MGI:87882]	protein_coding	1.66814	1.4615	1.36549
ENSMUSG00000002104	Rapsn	2	+	91035620	91045729	receptor-associated protein of the synapse [Source:MGI Symbol;Acc:MGI:99422]	protein_coding	8.73023	9.43356	9.53438
ENSMUSG00000002105	Slc39a13	2	-	91061791	91070417	solute carrier family 39 (metal ion transporter), member 13 [Source:MGI Symbol;Acc:MGI:1915677]	protein_coding	1.32844	1.16853	1.08974
ENSMUSG00000002107	Celf2	2	-	6539694	7509563	CUGBP, Elav-like family member 2 [Source:MGI Symbol;Acc:MGI:1338822]	protein_coding	35.3782	35.4446	35.7104
ENSMUSG00000002108	Nr1h3	2	-	91184061	91202834	nuclear receptor subfamily 1, group H, member 3 [Source:MGI Symbol;Acc:MGI:1352462]	protein_coding	1.44323	1.13315	0.943085
ENSMUSG00000002109	Ddb2	2	-	91211572	91236982	damage specific DNA binding protein 2 [Source:MGI Symbol;Acc:MGI:1355314]	protein_coding	0.851638	0.86303	0.841904
ENSMUSG00000002111	Spi1	2	+	91082390	91115756	spleen focus forming virus (SFFV) proviral integration oncogene [Source:MGI Symbol;Acc:MGI:98282]	protein_coding	95.9737	97.9989	99.1635
ENSMUSG00000002129	Sf3a1	11	+	4160350	4182541	splicing factor 3a, subunit 1 [Source:MGI Symbol;Acc:MGI:1914715]	protein_coding	2.00126	1.95672	1.91172
ENSMUSG00000002147	Stat6	10	+	127642986	127660957	signal transducer and activator of transcription 6 [Source:MGI Symbol;Acc:MGI:103034]	protein_coding	31.883	32.3937	32.5529
ENSMUSG00000002190	Clgn	8	+	83389867	83428552	calmegin [Source:MGI Symbol;Acc:MGI:107472]	protein_coding	0.0376153	0.0575182	0.0573322
ENSMUSG00000002204	Napsa	7	+	44572380	44586862	napsin A aspartic peptidase [Source:MGI Symbol;Acc:MGI:109365]	protein_coding	54.9071	43.812	38.5857
ENSMUSG00000002205	Vrk3	7	+	44748413	44777515	vaccinia related kinase 3 [Source:MGI Symbol;Acc:MGI:2182465]	protein_coding	1.62756	1.72219	1.79979
ENSMUSG00000002210	Smg9	7	+	24399619	24422778	smg-9 homolog, nonsense mediated mRNA decay factor (C. elegans) [Source:MGI Symbol;Acc:MGI:1919247]	protein_coding	33.9703	36.7465	37.2668
ENSMUSG00000002221	Paxip1	5	-	27740080	27791691	PAX interacting (with transcription-activation domain) protein 1 [Source:MGI Symbol;Acc:MGI:1890430]	protein_coding	0.813709	0.662855	0.583287
ENSMUSG00000002222	Rmnd5a	6	-	71388634	71440637	required for meiotic nuclear division 5 homolog A [Source:MGI Symbol;Acc:MGI:1915727]	protein_coding	1.3245	1.25595	1.23228
ENSMUSG00000002227	Mov10	3	-	104794836	104818563	Mov10 RISC complex RNA helicase [Source:MGI Symbol;Acc:MGI:97054]	protein_coding	2.94333	2.87726	2.86293
ENSMUSG00000002228	Ppm1j	3	+	104781056	104786018	protein phosphatase 1J [Source:MGI Symbol;Acc:MGI:1919137]	protein_coding	0.720755	0.713374	0.704611
ENSMUSG00000002233	Rhoc	3	+	104788375	104794459	ras homolog family member C [Source:MGI Symbol;Acc:MGI:106028]	protein_coding	3.55746	3.40431	3.34207
ENSMUSG00000002240	Prr27	5	+	87825686	87846387	proline rich 27 [Source:MGI Symbol;Acc:MGI:1921029]	protein_coding	0.0148267	0.0454464	0.0676972
ENSMUSG00000002249	Tead3	17	-	28331671	28350817	TEA domain family member 3 [Source:MGI Symbol;Acc:MGI:109241]	protein_coding	0.154166	0.155148	0.15287
ENSMUSG00000002250	Ppard	17	+	28232700	28301474	peroxisome proliferator activator receptor delta [Source:MGI Symbol;Acc:MGI:101884]	protein_coding	0.228976	0.23839	0.22823
ENSMUSG00000002257	Def6	17	+	28207778	28228608	differentially expressed in FDCP 6 [Source:MGI Symbol;Acc:MGI:1346328]	protein_coding	1.61006	1.78619	1.86652
ENSMUSG00000002265	Peg3	7	-	6703892	6730431	paternally expressed 3 [Source:MGI Symbol;Acc:MGI:104748]	protein_coding	0.372462	0.281652	0.253243
ENSMUSG00000002266	Zim1	7	-	6671269	6696450	zinc finger, imprinted 1 [Source:MGI Symbol;Acc:MGI:1341879]	protein_coding	0.0626775	0.0184774	-0.00715037
ENSMUSG00000002274	Metrn	17	-	25793221	25797136	meteorin, glial cell differentiation regulator [Source:MGI Symbol;Acc:MGI:1917333]	protein_coding	0.412424	0.438838	0.422208
ENSMUSG00000002279	Lmf1	17	+	25579085	25662826	lipase maturation factor 1 [Source:MGI Symbol;Acc:MGI:1923733]	protein_coding	1.04076	1.00916	0.993135
ENSMUSG00000002280	Ciao3	17	+	25773776	25783332	cytosolic iron-sulfur assembly component 3 [Source:MGI Symbol;Acc:MGI:1914813]	protein_coding	2.6298	2.93611	3.11835
ENSMUSG00000002289	Angptl4	17	-	33773750	33781830	angiopoietin-like 4 [Source:MGI Symbol;Acc:MGI:1888999]	protein_coding	0.445658	0.561875	0.592307
ENSMUSG00000002297	Dbf4	5	-	8396973	8422716	DBF4 zinc finger [Source:MGI Symbol;Acc:MGI:1351328]	protein_coding	3.42631	3.27077	3.25765
ENSMUSG00000002307	Daxx	17	+	33909414	33915590	Fas death domain-associated protein [Source:MGI Symbol;Acc:MGI:1197015]	protein_coding	2.00056	2.00528	1.94231
ENSMUSG00000002308	Cd320	17	+	33843091	33849774	CD320 antigen [Source:MGI Symbol;Acc:MGI:1860083]	protein_coding	1.18114	1.40049	1.50392
ENSMUSG00000002319	Ipo4	14	-	55625400	55635957	importin 4 [Source:MGI Symbol;Acc:MGI:1923001]	protein_coding	0.262738	0.206214	0.220307
ENSMUSG00000002320	Tm9sf1	14	-	55635965	55643806	transmembrane 9 superfamily member 1 [Source:MGI Symbol;Acc:MGI:1921390]	protein_coding	4.41767	4.10087	4.30504
ENSMUSG00000002324	Rec8	14	+	55618037	55625395	REC8 meiotic recombination protein [Source:MGI Symbol;Acc:MGI:1929645]	protein_coding	0.280775	0.265328	0.259192
ENSMUSG00000002325	Irf9	14	+	55603571	55610030	interferon regulatory factor 9 [Source:MGI Symbol;Acc:MGI:107587]	protein_coding	6.69326	6.72588	6.71645
ENSMUSG00000002326	Gmpr2	14	+	55671941	55679200	guanosine monophosphate reductase 2 [Source:MGI Symbol;Acc:MGI:1917903]	protein_coding	0.284736	0.279264	0.358414
ENSMUSG00000002329	Mdp1	14	-	55657879	55660508	magnesium-dependent phosphatase 1 [Source:MGI Symbol;Acc:MGI:1915131]	protein_coding	0.679789	0.683117	0.628964
ENSMUSG00000002332	Dhrs1	14	-	55739020	55745690	dehydrogenase/reductase (SDR family) member 1 [Source:MGI Symbol;Acc:MGI:1196314]	protein_coding	5.42256	5.23756	5.42265
ENSMUSG00000002341	Ncan	8	-	70093085	70120873	neurocan [Source:MGI Symbol;Acc:MGI:104694]	protein_coding	0.108719	0.0920972	0.0879224
ENSMUSG00000002342	Tmem161a	8	+	70172356	70183681	transmembrane protein 161A [Source:MGI Symbol;Acc:MGI:2384577]	protein_coding	1.80512	1.89907	1.91815
ENSMUSG00000002343	Armc6	8	-	70220172	70234466	armadillo repeat containing 6 [Source:MGI Symbol;Acc:MGI:1924063]	protein_coding	0.00503391	0.0421908	0.0356336
ENSMUSG00000002345	Borcs8	8	+	70139499	70147319	BLOC-1 related complex subunit 8 [Source:MGI Symbol;Acc:MGI:1919618]	protein_coding	8.00462	7.32634	6.9846
ENSMUSG00000002346	Slc25a42	8	-	70184340	70212305	solute carrier family 25, member 42 [Source:MGI Symbol;Acc:MGI:1920345]	protein_coding	0.105655	0.0763878	0.0769528
ENSMUSG00000002365	Snx9	17	+	5841329	5931954	sorting nexin 9 [Source:MGI Symbol;Acc:MGI:1913866]	protein_coding	10.282	10.329	10.3371
ENSMUSG00000002372	Ranbp3	17	+	56673294	56711764	RAN binding protein 3 [Source:MGI Symbol;Acc:MGI:1919060]	protein_coding	3.07369	3.18433	3.15361
ENSMUSG00000002379	Ndufa11	17	+	56717767	56722141	NADH:ubiquinone oxidoreductase subunit A11 [Source:MGI Symbol;Acc:MGI:1917125]	protein_coding	16.3015	14.4214	13.4687
ENSMUSG00000002384	Bmp8b	4	+	123105165	123132099	bone morphogenetic protein 8b [Source:MGI Symbol;Acc:MGI:107335]	protein_coding	0.353875	0.320824	0.300073
ENSMUSG00000002393	Nr2f6	8	-	71374123	71381960	nuclear receptor subfamily 2, group F, member 6 [Source:MGI Symbol;Acc:MGI:1352453]	protein_coding	0.590359	0.59877	0.592191
ENSMUSG00000002395	Use1	8	+	71366848	71369732	unconventional SNARE in the ER 1 homolog (S. cerevisiae) [Source:MGI Symbol;Acc:MGI:1914273]	protein_coding	28.9109	32.0436	33.8713
ENSMUSG00000002396	Ocel1	8	+	71371298	71379361	occludin/ELL domain containing 1 [Source:MGI Symbol;Acc:MGI:1924340]	protein_coding	5.38379	6.01095	6.25252
ENSMUSG00000002409	Dyrk1b	7	+	28179469	28187294	dual-specificity tyrosine-(Y)-phosphorylation regulated kinase 1b [Source:MGI Symbol;Acc:MGI:1330302]	protein_coding	1.30862	1.02565	0.973609
ENSMUSG00000002413	Braf	6	-	39603237	39725463	Braf transforming gene [Source:MGI Symbol;Acc:MGI:88190]	protein_coding	1.74224	1.97163	2.16852
ENSMUSG00000002416	Ndufb2	6	+	39592574	39603382	NADH:ubiquinone oxidoreductase subunit B2 [Source:MGI Symbol;Acc:MGI:1915448]	protein_coding	17.6078	17.2264	16.5879
ENSMUSG00000002428	Hltf	3	+	20057811	20118490	helicase-like transcription factor [Source:MGI Symbol;Acc:MGI:1196437]	protein_coding	2.78187	2.79726	2.81406
ENSMUSG00000002455	Prpf6	2	+	181591868	181655660	pre-mRNA splicing factor 6 [Source:MGI Symbol;Acc:MGI:1922946]	protein_coding	6.98068	7.26186	7.26346
ENSMUSG00000002458	Rgs19	2	-	181688419	181693977	regulator of G-protein signaling 19 [Source:MGI Symbol;Acc:MGI:1915153]	protein_coding	114.985	116.575	117.731
ENSMUSG00000002459	Rgs20	1	-	4909576	5070285	regulator of G-protein signaling 20 [Source:MGI Symbol;Acc:MGI:1929866]	protein_coding	0.0929323	0.0781984	0.0551613
ENSMUSG00000002475	Abhd3	18	-	10642092	10706771	abhydrolase domain containing 3 [Source:MGI Symbol;Acc:MGI:2147183]	protein_coding	1.12175	1.16866	1.17322
ENSMUSG00000002477	Snrpd1	18	+	10617775	10642079	small nuclear ribonucleoprotein D1 [Source:MGI Symbol;Acc:MGI:98344]	protein_coding	127.749	108.35	99.9324
ENSMUSG00000002486	Tchp	5	+	114707760	114722327	trichoplein, keratin filament binding [Source:MGI Symbol;Acc:MGI:1925082]	protein_coding	0.672241	0.442278	0.312041
ENSMUSG00000002489	Tiam1	16	-	89787111	90143769	T cell lymphoma invasion and metastasis 1 [Source:MGI Symbol;Acc:MGI:103306]	protein_coding	0.584642	0.647252	0.666565
ENSMUSG00000002496	Tsc2	17	-	24595816	24632630	TSC complex subunit 2 [Source:MGI Symbol;Acc:MGI:102548]	protein_coding	1.90328	1.94347	1.93708
ENSMUSG00000002500	Rpl3l	17	+	24727820	24736143	ribosomal protein L3-like [Source:MGI Symbol;Acc:MGI:1913461]	protein_coding	20.0002	19.4304	18.8435
ENSMUSG00000002504	Slc9a3r2	17	-	24639286	24650327	solute carrier family 9 (sodium/hydrogen exchanger), member 3 regulator 2 [Source:MGI Symbol;Acc:MGI:1890662]	protein_coding	0.298251	0.306141	0.283623
ENSMUSG00000002524	Puf60	15	-	76070182	76080924	poly-U binding splicing factor 60 [Source:MGI Symbol;Acc:MGI:1915209]	protein_coding	79.1015	72.9665	69.9123
ENSMUSG00000002546	Golga2	2	+	32287384	32307921	golgi autoantigen, golgin subfamily a, 2 [Source:MGI Symbol;Acc:MGI:2139395]	protein_coding	2.97471	3.00834	3.01431
ENSMUSG00000002550	Uck1	2	-	32255002	32260159	uridine-cytidine kinase 1 [Source:MGI Symbol;Acc:MGI:98904]	protein_coding	4.86589	5.40535	5.71742
ENSMUSG00000002565	Scin	12	-	40059769	40134228	scinderin [Source:MGI Symbol;Acc:MGI:1306794]	protein_coding	0.169298	0.167697	0.165556
ENSMUSG00000002578	Ikzf4	10	-	128630843	128669358	IKAROS family zinc finger 4 [Source:MGI Symbol;Acc:MGI:1343139]	protein_coding	0.0714503	0.0853756	0.0821517
ENSMUSG00000002580	Mien1	11	-	98437708	98438991	migration and invasion enhancer 1 [Source:MGI Symbol;Acc:MGI:1913678]	protein_coding	12.3337	9.57387	8.67931
ENSMUSG00000002588	Pon1	6	-	5168090	5193946	paraoxonase 1 [Source:MGI Symbol;Acc:MGI:103295]	protein_coding	0.410911	0.40508	0.421368
ENSMUSG00000002602	Axl	7	-	25757273	25788705	AXL receptor tyrosine kinase [Source:MGI Symbol;Acc:MGI:1347244]	protein_coding	0.398325	0.321635	0.289253
ENSMUSG00000002603	Tgfb1	7	+	25687002	25705077	transforming growth factor, beta 1 [Source:MGI Symbol;Acc:MGI:98725]	protein_coding	0.955035	1.02773	1.08085
ENSMUSG00000002608	Ccdc97	7	-	25711106	25719088	coiled-coil domain containing 97 [Source:MGI Symbol;Acc:MGI:1196455]	protein_coding	12.9773	13.8023	14.1018
ENSMUSG00000002617	Zfp40	17	-	23173869	23193252	zinc finger protein 40 [Source:MGI Symbol;Acc:MGI:99185]	protein_coding	0.0342949	0.0426545	0.0519288
ENSMUSG00000002625	Akap8l	17	-	32321424	32350607	A kinase (PRKA) anchor protein 8-like [Source:MGI Symbol;Acc:MGI:1860606]	protein_coding	4.20387	4.14029	4.14133
ENSMUSG00000002633	Shh	5	-	28456815	28467256	sonic hedgehog [Source:MGI Symbol;Acc:MGI:98297]	protein_coding	0.0374673	0.023118	0.0166869
ENSMUSG00000002635	Pdcd2l	7	-	34184499	34196661	programmed cell death 2-like [Source:MGI Symbol;Acc:MGI:1915329]	protein_coding	34.3384	39.8599	41.9343
ENSMUSG00000002658	Gtf2f1	17	-	57003405	57011288	general transcription factor IIF, polypeptide 1 [Source:MGI Symbol;Acc:MGI:1923848]	protein_coding	8.46277	8.12117	7.92946
ENSMUSG00000002660	Clpp	17	+	56990305	56996188	caseinolytic mitochondrial matrix peptidase proteolytic subunit [Source:MGI Symbol;Acc:MGI:1858213]	protein_coding	39.2741	36.7627	35.5507
ENSMUSG00000002661	Alkbh7	17	+	56997339	56999322	alkB homolog 7 [Source:MGI Symbol;Acc:MGI:1913650]	protein_coding	1.17076	1.15094	1.10337
ENSMUSG00000002664	Pspn	17	-	56999457	57000018	persephin [Source:MGI Symbol;Acc:MGI:1201684]	protein_coding	0.0371655	-0.00647078	-0.0295542
ENSMUSG00000002668	Dennd1c	17	-	57065905	57078514	DENN/MADD domain containing 1C [Source:MGI Symbol;Acc:MGI:1918035]	protein_coding	9.98035	10.5537	10.9674
ENSMUSG00000002679	Med6	12	-	81573557	81595008	mediator complex subunit 6 [Source:MGI Symbol;Acc:MGI:1917042]	protein_coding	5.43241	5.63693	5.6064
ENSMUSG00000002688	Prkd1	12	-	50341231	50649098	protein kinase D1 [Source:MGI Symbol;Acc:MGI:99879]	protein_coding	0.0409515	0.0329718	0.034587
ENSMUSG00000002699	Lcp2	11	+	34046920	34092295	lymphocyte cytosolic protein 2 [Source:MGI Symbol;Acc:MGI:1321402]	protein_coding	48.2004	52.5544	55.0242
ENSMUSG00000002718	Cse1l	2	+	166906040	166946389	chromosome segregation 1-like (S. cerevisiae) [Source:MGI Symbol;Acc:MGI:1339951]	protein_coding	0.637427	0.836532	0.896602
ENSMUSG00000002728	Naa20	2	+	145902099	145916425	N(alpha)-acetyltransferase 20, NatB catalytic subunit [Source:MGI Symbol;Acc:MGI:1915127]	protein_coding	6.14297	5.36529	5.06396
ENSMUSG00000002731	Prkra	2	-	76629898	76648015	protein kinase, interferon inducible double stranded RNA dependent activator [Source:MGI Symbol;Acc:MGI:1344375]	protein_coding	1.52757	1.47332	1.43156
ENSMUSG00000002732	Fkbp7	2	-	76663044	76673116	FK506 binding protein 7 [Source:MGI Symbol;Acc:MGI:1336879]	protein_coding	0.610514	0.713706	0.756993
ENSMUSG00000002733	Plekha3	2	+	76675281	76696828	pleckstrin homology domain-containing, family A (phosphoinositide binding specific) member 3 [Source:MGI Symbol;Acc:MGI:1932515]	protein_coding	2.64264	2.69274	2.74561
ENSMUSG00000002741	Ykt6	11	+	5955693	5967780	YKT6 v-SNARE homolog (S. cerevisiae) [Source:MGI Symbol;Acc:MGI:1927550]	protein_coding	28.981	30.1014	30.4862
ENSMUSG00000002748	Baz1b	5	+	135187264	135246129	bromodomain adjacent to zinc finger domain, 1B [Source:MGI Symbol;Acc:MGI:1353499]	protein_coding	3.26728	3.32606	3.33229
ENSMUSG00000002763	Pex6	17	+	46711463	46725541	peroxisomal biogenesis factor 6 [Source:MGI Symbol;Acc:MGI:2385054]	protein_coding	6.18699	5.80191	5.5134
ENSMUSG00000002767	Mrpl2	17	+	46646229	46650139	mitochondrial ribosomal protein L2 [Source:MGI Symbol;Acc:MGI:1351622]	protein_coding	4.10919	3.95562	3.82423
ENSMUSG00000002768	Mea1	17	+	46678793	46683111	male enhanced antigen 1 [Source:MGI Symbol;Acc:MGI:96957]	protein_coding	42.6983	37.2047	33.8141
ENSMUSG00000002769	Gnmt	17	-	46725664	46729168	glycine N-methyltransferase [Source:MGI Symbol;Acc:MGI:1202304]	protein_coding	0.67938	0.666857	0.64653
ENSMUSG00000002771	Grin2d	7	-	45831883	45878378	glutamate receptor, ionotropic, NMDA2D (epsilon 4) [Source:MGI Symbol;Acc:MGI:95823]	protein_coding	0.050005	0.0709988	0.0722235
ENSMUSG00000002778	Kdelr1	7	+	45872772	45883732	KDEL (Lys-Asp-Glu-Leu) endoplasmic reticulum protein retention receptor 1 [Source:MGI Symbol;Acc:MGI:1915387]	protein_coding	13.5802	10.0209	8.55192
ENSMUSG00000002781	Tmem143	7	+	45896941	45917413	transmembrane protein 143 [Source:MGI Symbol;Acc:MGI:1917459]	protein_coding	0.468548	0.424956	0.403925
ENSMUSG00000002791	Pdxk-ps	17	-	32076083	32107350	pyridoxal (pyridoxine, vitamin B6) kinase, pseudogene [Source:MGI Symbol;Acc:MGI:1933201]	transcribed_unprocessed_pseudogene	0.131374	0.0940094	0.0693491
ENSMUSG00000002797	Ggct	6	-	54982580	54992950	gamma-glutamyl cyclotransferase [Source:MGI Symbol;Acc:MGI:95700]	protein_coding	0.404365	0.416595	0.418772
ENSMUSG00000002799	Jag2	12	-	112907819	112929776	jagged 2 [Source:MGI Symbol;Acc:MGI:1098270]	protein_coding	0.268502	0.243827	0.226553
ENSMUSG00000002803	Btbd6	12	+	112976482	112978945	BTB (POZ) domain containing 6 [Source:MGI Symbol;Acc:MGI:3026623]	protein_coding	0.785506	0.759684	0.743554
ENSMUSG00000002804	Nudt14	12	-	112934291	112942124	nudix (nucleoside diphosphate linked moiety X)-type motif 14 [Source:MGI Symbol;Acc:MGI:1913424]	protein_coding	1.31615	1.48409	1.53134
ENSMUSG00000002808	Epdr1	13	-	19591706	19619927	ependymin related protein 1 (zebrafish) [Source:MGI Symbol;Acc:MGI:2145369]	protein_coding	0.182784	0.226834	0.251743
ENSMUSG00000002812	Flii	11	-	60714123	60727263	flightless I actin binding protein [Source:MGI Symbol;Acc:MGI:1342286]	protein_coding	29.1145	27.1039	26.1589
ENSMUSG00000002814	Top3a	11	-	60740058	60777365	topoisomerase (DNA) III alpha [Source:MGI Symbol;Acc:MGI:1197527]	protein_coding	1.4358	1.36451	1.30508
ENSMUSG00000002820	Atg4d	9	+	21265293	21277772	autophagy related 4D, cysteine peptidase [Source:MGI Symbol;Acc:MGI:2444308]	protein_coding	2.45972	2.2497	2.16618
ENSMUSG00000002825	Qtrt1	9	+	21411837	21420274	queuine tRNA-ribosyltransferase catalytic subunit 1 [Source:MGI Symbol;Acc:MGI:1931441]	protein_coding	2.07228	2.10317	2.14992
ENSMUSG00000002831	Plin4	17	-	56100591	56109803	perilipin 4 [Source:MGI Symbol;Acc:MGI:1929709]	protein_coding	0.571237	0.58005	0.580945
ENSMUSG00000002833	Hdgfl2	17	+	56079634	56100607	HDGF like 2 [Source:MGI Symbol;Acc:MGI:1194492]	protein_coding	3.97263	3.86411	3.8728
ENSMUSG00000002835	Chaf1a	17	+	56040439	56072289	chromatin assembly factor 1, subunit A (p150) [Source:MGI Symbol;Acc:MGI:1351331]	protein_coding	1.31061	1.38376	1.39092
ENSMUSG00000002844	Adprh	16	-	38444030	38452703	ADP-ribosylarginine hydrolase [Source:MGI Symbol;Acc:MGI:1098234]	protein_coding	3.50744	4.47301	4.9928
ENSMUSG00000002845	Tmem39a	16	+	38558698	38592162	transmembrane protein 39a [Source:MGI Symbol;Acc:MGI:1915096]	protein_coding	0.993135	1.0126	0.957826
ENSMUSG00000002846	Timmdc1	16	-	38498347	38522663	translocase of inner mitochondrial membrane domain containing 1 [Source:MGI Symbol;Acc:MGI:1922139]	protein_coding	1.56646	1.62485	1.59335
ENSMUSG00000002847	Pla1a	16	-	38396117	38433145	phospholipase A1 member A [Source:MGI Symbol;Acc:MGI:1934677]	protein_coding	0.384945	0.315125	0.296204
ENSMUSG00000002870	Mcm2	6	-	88883474	88898780	minichromosome maintenance complex component 2 [Source:MGI Symbol;Acc:MGI:105380]	protein_coding	0.991704	1.11472	1.17716
ENSMUSG00000002871	Tpra1	6	+	88902251	88912238	transmembrane protein, adipocyte asscociated 1 [Source:MGI Symbol;Acc:MGI:1345190]	protein_coding	8.81861	8.64976	8.61799
ENSMUSG00000002881	Nab1	1	-	52457294	52500679	Ngfi-A binding protein 1 [Source:MGI Symbol;Acc:MGI:107564]	protein_coding	0.39764	0.460556	0.485436
ENSMUSG00000002885	Adgre5	8	-	83723251	83741326	adhesion G protein-coupled receptor E5 [Source:MGI Symbol;Acc:MGI:1347095]	protein_coding	111.841	116.076	118.355
ENSMUSG00000002897	Il17ra	6	+	120463247	120487559	interleukin 17 receptor A [Source:MGI Symbol;Acc:MGI:107399]	protein_coding	102.986	110.318	116.053
ENSMUSG00000002900	Lamb1	12	+	31265234	31329644	laminin B1 [Source:MGI Symbol;Acc:MGI:96743]	protein_coding	0.346622	0.319219	0.317754
ENSMUSG00000002908	Kcnn1	8	-	70842049	70863258	potassium intermediate/small conductance calcium-activated channel, subfamily N, member 1 [Source:MGI Symbol;Acc:MGI:1933993]	protein_coding	0.069261	0.0670192	0.0640648
ENSMUSG00000002910	Arrdc2	8	-	70835129	70839720	arrestin domain containing 2 [Source:MGI Symbol;Acc:MGI:1918057]	protein_coding	3.76607	3.7928	3.73483
ENSMUSG00000002930	Ppp1r17	6	+	56017497	56032689	protein phosphatase 1, regulatory subunit 17 [Source:MGI Symbol;Acc:MGI:1333876]	protein_coding	0.0344286	0.0384556	0.039494
ENSMUSG00000002944	Cd36	5	-	17781690	17888801	CD36 molecule [Source:MGI Symbol;Acc:MGI:107899]	protein_coding	2.38022	2.35041	2.38244
ENSMUSG00000002948	Map2k7	8	+	4238740	4247897	mitogen-activated protein kinase kinase 7 [Source:MGI Symbol;Acc:MGI:1346871]	protein_coding	2.18764	2.3379	2.5151
ENSMUSG00000002949	Timm44	8	-	4259731	4275913	translocase of inner mitochondrial membrane 44 [Source:MGI Symbol;Acc:MGI:1343262]	protein_coding	9.50972	10.7366	11.2319
ENSMUSG00000002957	Ap2a2	7	+	141562173	141633011	adaptor-related protein complex 2, alpha 2 subunit [Source:MGI Symbol;Acc:MGI:101920]	protein_coding	7.82639	7.95851	7.99289
ENSMUSG00000002963	Pnkp	7	+	44857139	44862992	polynucleotide kinase 3'- phosphatase [Source:MGI Symbol;Acc:MGI:1891698]	protein_coding	31.3697	27.1026	24.9757
ENSMUSG00000002968	Med25	7	-	44876765	44892712	mediator complex subunit 25 [Source:MGI Symbol;Acc:MGI:1922863]	protein_coding	2.05146	2.0939	2.08414
ENSMUSG00000002980	Bcam	7	-	19756131	19771016	basal cell adhesion molecule [Source:MGI Symbol;Acc:MGI:1929940]	protein_coding	0.361596	0.336803	0.323526
ENSMUSG00000002981	Clptm1	7	-	19631571	19665033	cleft lip and palate associated transmembrane protein 1 [Source:MGI Symbol;Acc:MGI:1927155]	protein_coding	4.99643	4.27063	3.8957
ENSMUSG00000002983	Relb	7	-	19606217	19629438	avian reticuloendotheliosis viral (v-rel) oncogene related B [Source:MGI Symbol;Acc:MGI:103289]	protein_coding	1.41205	1.40514	1.36333
ENSMUSG00000002984	Tomm40	7	-	19701313	19715438	translocase of outer mitochondrial membrane 40 [Source:MGI Symbol;Acc:MGI:1858259]	protein_coding	7.70391	8.39254	8.62502
ENSMUSG00000002985	Apoe	7	-	19696109	19699188	apolipoprotein E [Source:MGI Symbol;Acc:MGI:88057]	protein_coding	58.3796	47.2995	42.5788
ENSMUSG00000002992	Apoc2	7	-	19671579	19677941	apolipoprotein C-II [Source:MGI Symbol;Acc:MGI:88054]	protein_coding	85.7705	85.8644	81.8415
ENSMUSG00000002996	Hbp1	12	-	31926254	31950535	high mobility group box transcription factor 1 [Source:MGI Symbol;Acc:MGI:894659]	protein_coding	1.27381	1.30475	1.29066
ENSMUSG00000002997	Prkar2b	12	-	31958476	32061296	protein kinase, cAMP dependent regulatory, type II beta [Source:MGI Symbol;Acc:MGI:97760]	protein_coding	1.57572	2.14209	2.51035
ENSMUSG00000003031	Cdkn1b	6	+	134920401	134925513	cyclin-dependent kinase inhibitor 1B [Source:MGI Symbol;Acc:MGI:104565]	protein_coding	5.66206	6.06195	6.11221
ENSMUSG00000003032	Klf4	4	-	55527143	55532466	Kruppel-like factor 4 (gut) [Source:MGI Symbol;Acc:MGI:1342287]	protein_coding	7.79737	8.17386	8.44338
ENSMUSG00000003033	Ap1m1	8	+	72240018	72257385	adaptor-related protein complex AP-1, mu subunit 1 [Source:MGI Symbol;Acc:MGI:102776]	protein_coding	76.3062	72.3018	68.1279
ENSMUSG00000003037	Rab8a	8	+	72161200	72183904	RAB8A, member RAS oncogene family [Source:MGI Symbol;Acc:MGI:96960]	protein_coding	63.3436	63.4482	62.3303
ENSMUSG00000003038	Hmgn2	4	-	133964738	133968650	high mobility group nucleosomal binding domain 2 [Source:MGI Symbol;Acc:MGI:96136]	protein_coding	633.76	608.543	597.072
ENSMUSG00000003039	Fam32a	8	+	72219730	72224418	family with sequence similarity 32, member A [Source:MGI Symbol;Acc:MGI:1915172]	protein_coding	133.566	133.361	133.176
ENSMUSG00000003051	Elf3	1	-	135253575	135258568	E74-like factor 3 [Source:MGI Symbol;Acc:MGI:1101781]	protein_coding	1.50105	1.55388	1.57514
ENSMUSG00000003053	Cyp2c29	19	+	39269405	39330713	cytochrome P450, family 2, subfamily c, polypeptide 29 [Source:MGI Symbol;Acc:MGI:103238]	protein_coding	3.33402	3.36172	3.34596
ENSMUSG00000003062	Stard3nl	13	-	19357676	19395795	STARD3 N-terminal like [Source:MGI Symbol;Acc:MGI:1923455]	protein_coding	14.3351	13.9909	13.2636
ENSMUSG00000003068	Stk11	10	+	80115803	80130682	serine/threonine kinase 11 [Source:MGI Symbol;Acc:MGI:1341870]	protein_coding	13.2809	13.108	13.076
ENSMUSG00000003070	Efna2	10	+	80179482	80190010	ephrin A2 [Source:MGI Symbol;Acc:MGI:102707]	protein_coding	-0.00456643	-0.0143546	0.0192179
ENSMUSG00000003072	Atp5d	10	+	80138632	80145818	ATP synthase, H+ transporting, mitochondrial F1 complex, delta subunit [Source:MGI Symbol;Acc:MGI:1913293]	protein_coding	45.1455	42.7741	42.3475
ENSMUSG00000003099	Ppp5c	7	-	17004640	17027924	protein phosphatase 5, catalytic subunit [Source:MGI Symbol;Acc:MGI:102666]	protein_coding	2.90834	2.6398	2.56985
ENSMUSG00000003119	Cdk12	11	+	98203059	98278504	cyclin-dependent kinase 12 [Source:MGI Symbol;Acc:MGI:1098802]	protein_coding	3.26128	2.95193	2.81768
ENSMUSG00000003123	Lipe	7	-	25379527	25398710	lipase, hormone sensitive [Source:MGI Symbol;Acc:MGI:96790]	protein_coding	4.61573	4.46586	4.49693
ENSMUSG00000003131	Pafah1b2	9	-	45962859	46012690	platelet-activating factor acetylhydrolase, isoform 1b, subunit 2 [Source:MGI Symbol;Acc:MGI:108415]	protein_coding	1.4185	1.60324	1.63122
ENSMUSG00000003134	Tbc1d8	1	-	39371492	39478755	TBC1 domain family, member 8 [Source:MGI Symbol;Acc:MGI:1927225]	protein_coding	9.30213	9.46014	9.68372
ENSMUSG00000003135	Cnot11	1	+	39534992	39546889	CCR4-NOT transcription complex, subunit 11 [Source:MGI Symbol;Acc:MGI:106580]	protein_coding	2.56726	2.59416	2.59148
ENSMUSG00000003153	Slc2a3	6	-	122727809	122801640	solute carrier family 2 (facilitated glucose transporter), member 3 [Source:MGI Symbol;Acc:MGI:95757]	protein_coding	3.51711	4.03207	4.40599
ENSMUSG00000003154	Foxj2	6	+	122819914	122845366	forkhead box J2 [Source:MGI Symbol;Acc:MGI:1926805]	protein_coding	1.18817	1.35494	1.39584
ENSMUSG00000003161	Sri	5	+	8046078	8069379	sorcin [Source:MGI Symbol;Acc:MGI:98419]	protein_coding	83.3186	76.9328	73.8917
ENSMUSG00000003166	Dgcr2	16	-	17839482	17898562	DiGeorge syndrome critical region gene 2 [Source:MGI Symbol;Acc:MGI:892866]	protein_coding	1.62042	1.64346	1.65028
ENSMUSG00000003184	Irf3	7	+	44997648	45002848	interferon regulatory factor 3 [Source:MGI Symbol;Acc:MGI:1859179]	protein_coding	4.19913	4.01667	3.86312
ENSMUSG00000003190	Bcl2l12	7	-	44991222	44998712	BCL2-like 12 (proline rich) [Source:MGI Symbol;Acc:MGI:1922986]	protein_coding	1.9721	2.162	2.18846
ENSMUSG00000003198	Zfp959	17	+	55892093	55898928	zinc finger protein 959 [Source:MGI Symbol;Acc:MGI:2385058]	protein_coding	0.157563	0.189535	0.189427
ENSMUSG00000003199	Mpnd	17	+	56005711	56016790	MPN domain containing [Source:MGI Symbol;Acc:MGI:1915297]	protein_coding	12.0283	10.7922	10.3368
ENSMUSG00000003200	Sh3gl1	17	-	56016750	56036635	SH3-domain GRB2-like 1 [Source:MGI Symbol;Acc:MGI:700010]	protein_coding	15.4225	14.9962	14.6126
ENSMUSG00000003206	Ebi3	17	+	55952640	55957022	Epstein-Barr virus induced gene 3 [Source:MGI Symbol;Acc:MGI:1354171]	protein_coding	1.16328	1.1247	1.20136
ENSMUSG00000003208	Yju2	17	+	55959099	55968285	YJU2 splicing factor [Source:MGI Symbol;Acc:MGI:1920136]	protein_coding	3.10858	3.09632	3.09827
ENSMUSG00000003226	Ranbp2	10	+	58446920	58494356	RAN binding protein 2 [Source:MGI Symbol;Acc:MGI:894323]	protein_coding	8.91554	9.72889	10.2342
ENSMUSG00000003227	Edar	10	-	58600789	58675654	ectodysplasin-A receptor [Source:MGI Symbol;Acc:MGI:1343498]	protein_coding	0.0225114	0.0287386	0.041795
ENSMUSG00000003228	Grk5	19	+	60889749	61095968	G protein-coupled receptor kinase 5 [Source:MGI Symbol;Acc:MGI:109161]	protein_coding	0.986239	1.11915	1.13248
ENSMUSG00000003233	Dvl3	16	+	20516982	20534010	dishevelled segment polarity protein 3 [Source:MGI Symbol;Acc:MGI:108100]	protein_coding	3.74354	2.8877	2.5949
ENSMUSG00000003234	Abcf3	16	+	20548577	20561379	ATP-binding cassette, sub-family F (GCN20), member 3 [Source:MGI Symbol;Acc:MGI:1351656]	protein_coding	1.30931	1.26511	1.22505
ENSMUSG00000003235	Eif2b5	16	+	20498817	20509323	eukaryotic translation initiation factor 2B, subunit 5 epsilon [Source:MGI Symbol;Acc:MGI:2446176]	protein_coding	6.67039	6.06094	5.8002
ENSMUSG00000003269	Cyth2	7	-	45806637	45814581	cytohesin 2 [Source:MGI Symbol;Acc:MGI:1334255]	protein_coding	15.9654	19.2413	21.4699
ENSMUSG00000003271	Sult2b1	7	-	45729983	45784669	sulfotransferase family, cytosolic, 2B, member 1 [Source:MGI Symbol;Acc:MGI:1926342]	protein_coding	2.34476	2.28467	2.26422
ENSMUSG00000003273	Car11	7	+	45699843	45704682	carbonic anhydrase 11 [Source:MGI Symbol;Acc:MGI:1336193]	protein_coding	0.27424	0.309932	0.320524
ENSMUSG00000003279	Dlgap1	17	+	69969073	70821413	DLG associated protein 1 [Source:MGI Symbol;Acc:MGI:1346065]	protein_coding	1.14803	0.997517	0.969313
ENSMUSG00000003282	Plag1	4	-	3900996	3938423	pleiomorphic adenoma gene 1 [Source:MGI Symbol;Acc:MGI:1891916]	protein_coding	0.1603	0.16336	0.164786
ENSMUSG00000003283	Hck	2	+	153108468	153151441	hemopoietic cell kinase [Source:MGI Symbol;Acc:MGI:96052]	protein_coding	9.24951	9.07788	8.90016
ENSMUSG00000003299	Mrpl4	9	+	21002738	21008839	mitochondrial ribosomal protein L4 [Source:MGI Symbol;Acc:MGI:2137210]	protein_coding	1.00173	1.07035	1.0879
ENSMUSG00000003308	Keap1	9	-	21229730	21239361	kelch-like ECH-associated protein 1 [Source:MGI Symbol;Acc:MGI:1858732]	protein_coding	2.43532	2.36134	2.39305
ENSMUSG00000003309	Ap1m2	9	-	21294275	21312337	adaptor protein complex AP-1, mu 2 subunit [Source:MGI Symbol;Acc:MGI:1336974]	protein_coding	1.15628	1.14244	1.09314
ENSMUSG00000003316	Glg1	8	-	111154421	111259216	golgi apparatus protein 1 [Source:MGI Symbol;Acc:MGI:104967]	protein_coding	7.34598	7.56761	7.65594
ENSMUSG00000003341	Atp8b3	10	-	80519584	80539124	ATPase, class I, type 8B, member 3 [Source:MGI Symbol;Acc:MGI:1914581]	protein_coding	0.0526228	0.041267	0.0377614
ENSMUSG00000003344	Btbd2	10	-	80642617	80657071	BTB (POZ) domain containing 2 [Source:MGI Symbol;Acc:MGI:1933831]	protein_coding	0.337951	0.308927	0.324193
ENSMUSG00000003345	Csnk1g2	10	+	80622838	80640749	casein kinase 1, gamma 2 [Source:MGI Symbol;Acc:MGI:1920014]	protein_coding	17.4028	17.8313	18.0783
ENSMUSG00000003346	Abhd17a	10	-	80583654	80590341	abhydrolase domain containing 17A [Source:MGI Symbol;Acc:MGI:106388]	protein_coding	7.29672	7.9295	8.13823
ENSMUSG00000003348	Mob3a	10	-	80685253	80701977	MOB kinase activator 3A [Source:MGI Symbol;Acc:MGI:3050117]	protein_coding	11.165	10.8913	10.8562
ENSMUSG00000003352	Cacnb3	15	+	98630840	98644529	calcium channel, voltage-dependent, beta 3 subunit [Source:MGI Symbol;Acc:MGI:103307]	protein_coding	0.376938	0.345726	0.322923
ENSMUSG00000003354	Ccdc65	15	+	98708207	98723336	coiled-coil domain containing 65 [Source:MGI Symbol;Acc:MGI:2146001]	protein_coding	0.0701618	0.0857103	0.0697309
ENSMUSG00000003355	Fkbp11	15	-	98724366	98728198	FK506 binding protein 11 [Source:MGI Symbol;Acc:MGI:1913370]	protein_coding	3.72746	3.98787	4.05493
ENSMUSG00000003360	Ddx23	15	-	98645134	98662894	DEAD (Asp-Glu-Ala-Asp) box polypeptide 23 [Source:MGI Symbol;Acc:MGI:1921601]	protein_coding	5.1251	5.32623	5.40191
ENSMUSG00000003363	Pld3	7	-	27532000	27553218	phospholipase D family, member 3 [Source:MGI Symbol;Acc:MGI:1333782]	protein_coding	1.12078	1.2404	1.33433
ENSMUSG00000003378	Grik5	7	-	25009849	25072346	glutamate receptor, ionotropic, kainate 5 (gamma 2) [Source:MGI Symbol;Acc:MGI:95818]	protein_coding	1.06322	0.957184	0.948176
ENSMUSG00000003379	Cd79a	7	+	24897381	24902197	CD79A antigen (immunoglobulin-associated alpha) [Source:MGI Symbol;Acc:MGI:101774]	protein_coding	-0.00631137	0.166835	0.260404
ENSMUSG00000003380	Rabac1	7	-	24969752	24972754	Rab acceptor 1 (prenylated) [Source:MGI Symbol;Acc:MGI:1201692]	protein_coding	22.3139	21.7146	21.3457
ENSMUSG00000003382	Etv3	3	+	87525407	87540156	ets variant 3 [Source:MGI Symbol;Acc:MGI:1350926]	protein_coding	0.595545	0.63348	0.644757
ENSMUSG00000003402	Prkcsh	9	+	22002806	22014222	protein kinase C substrate 80K-H [Source:MGI Symbol;Acc:MGI:107877]	protein_coding	9.05243	8.85542	8.71632
ENSMUSG00000003410	Elavl3	9	-	22015005	22052023	ELAV like RNA binding protein 3 [Source:MGI Symbol;Acc:MGI:109157]	protein_coding	0.358222	0.240527	0.209342
ENSMUSG00000003411	Rab3b	4	+	108879063	108943324	RAB3B, member RAS oncogene family [Source:MGI Symbol;Acc:MGI:1917158]	protein_coding	0.235861	0.222722	0.230133
ENSMUSG00000003418	St8sia6	2	-	13651021	13794064	ST8 alpha-N-acetyl-neuraminide alpha-2,8-sialyltransferase 6 [Source:MGI Symbol;Acc:MGI:2386797]	protein_coding	0.025051	0.0145077	0.0343332
ENSMUSG00000003420	Fcgrt	7	-	45092990	45103851	Fc receptor, IgG, alpha chain transporter [Source:MGI Symbol;Acc:MGI:103017]	protein_coding	1.48318	1.46176	1.47068
ENSMUSG00000003421	Nosip	7	+	45062429	45078210	nitric oxide synthase interacting protein [Source:MGI Symbol;Acc:MGI:1913644]	protein_coding	17.9528	22.9079	26.1577
ENSMUSG00000003423	Pih1d1	7	+	45154303	45160065	PIH1 domain containing 1 [Source:MGI Symbol;Acc:MGI:1916095]	protein_coding	3.94862	3.98501	3.98224
ENSMUSG00000003429	Rps11	7	-	45122379	45124439	ribosomal protein S11 [Source:MGI Symbol;Acc:MGI:1351329]	protein_coding	212.581	199.908	192.817
ENSMUSG00000003435	Supt5	7	-	28314891	28338746	suppressor of Ty 5, DSIF elongation factor subunit [Source:MGI Symbol;Acc:MGI:1202400]	protein_coding	16.6841	17.0425	17.3545
ENSMUSG00000003436	Dll3	7	-	28293553	28302238	delta like canonical Notch ligand 3 [Source:MGI Symbol;Acc:MGI:1096877]	protein_coding	0.0960336	0.0840549	0.0749037
ENSMUSG00000003437	Paf1	7	+	28392951	28399388	Paf1, RNA polymerase II complex component [Source:MGI Symbol;Acc:MGI:1923988]	protein_coding	21.2971	21.0606	20.8632
ENSMUSG00000003438	Timm50	7	-	28305516	28312072	translocase of inner mitochondrial membrane 50 [Source:MGI Symbol;Acc:MGI:1913775]	protein_coding	8.76675	8.78497	8.73562
ENSMUSG00000003444	Med29	7	-	28386146	28392708	mediator complex subunit 29 [Source:MGI Symbol;Acc:MGI:1914474]	protein_coding	57.8951	47.3052	43.0108
ENSMUSG00000003452	Bicd1	6	+	149408886	149563329	BICD cargo adaptor 1 [Source:MGI Symbol;Acc:MGI:1101760]	protein_coding	0.185599	0.144183	0.161819
ENSMUSG00000003458	Ncstn	1	-	172066013	172082795	nicastrin [Source:MGI Symbol;Acc:MGI:1891700]	protein_coding	15.3572	16.3638	16.9814
ENSMUSG00000003464	Pex19	1	+	172126755	172136493	peroxisomal biogenesis factor 19 [Source:MGI Symbol;Acc:MGI:1334458]	protein_coding	1.90266	2.12938	2.15698
ENSMUSG00000003469	Phyhip	14	+	70457476	70468832	phytanoyl-CoA hydroxylase interacting protein [Source:MGI Symbol;Acc:MGI:1860417]	protein_coding	1.09308	1.01859	0.982505
ENSMUSG00000003476	Crhr2	6	-	55090049	55133016	corticotropin releasing hormone receptor 2 [Source:MGI Symbol;Acc:MGI:894312]	protein_coding	0.0736501	0.0410221	0.0220568
ENSMUSG00000003477	Inmt	6	-	55170626	55175043	indolethylamine N-methyltransferase [Source:MGI Symbol;Acc:MGI:102963]	protein_coding	0.412135	0.414152	0.410304
ENSMUSG00000003484	Cyp4f18	8	-	71988482	72009626	cytochrome P450, family 4, subfamily f, polypeptide 18 [Source:MGI Symbol;Acc:MGI:1919304]	protein_coding	305.247	298.05	295.436
ENSMUSG00000003500	Impdh1	6	-	29200434	29216364	inosine monophosphate dehydrogenase 1 [Source:MGI Symbol;Acc:MGI:96567]	protein_coding	1.27168	1.11083	1.07467
ENSMUSG00000003505	Psg18	7	-	18345422	18355009	pregnancy specific glycoprotein 18 [Source:MGI Symbol;Acc:MGI:1347251]	protein_coding	-0.00908172	0.00328319	0.00586252
ENSMUSG00000003518	Dusp3	11	-	101971143	101987013	dual specificity phosphatase 3 (vaccinia virus phosphatase VH1-related) [Source:MGI Symbol;Acc:MGI:1919599]	protein_coding	0.385881	0.688993	0.894741
ENSMUSG00000003526	Prodh	16	-	18060357	18090203	proline dehydrogenase [Source:MGI Symbol;Acc:MGI:97770]	protein_coding	0.383162	0.372577	0.362501
ENSMUSG00000003527	Ess2	16	-	17900709	17911348	ess-2 splicing factor [Source:MGI Symbol;Acc:MGI:107854]	protein_coding	0.673428	0.652336	0.634715
ENSMUSG00000003528	Slc25a1	16	-	17925223	17928219	solute carrier family 25 (mitochondrial carrier, citrate transporter), member 1 [Source:MGI Symbol;Acc:MGI:1345283]	protein_coding	26.1422	27.4476	28.3339
ENSMUSG00000003531	Dgcr6	16	+	18052860	18071632	DiGeorge syndrome critical region gene 6 [Source:MGI Symbol;Acc:MGI:1202877]	protein_coding	5.81528	6.02933	5.94948
ENSMUSG00000003534	Ddr1	17	-	35681567	35704621	discoidin domain receptor family, member 1 [Source:MGI Symbol;Acc:MGI:99216]	protein_coding	0.802719	0.756206	0.736251
ENSMUSG00000003541	Ier3	17	+	35821684	35822923	immediate early response 3 [Source:MGI Symbol;Acc:MGI:104814]	protein_coding	170.014	191.597	203.103
ENSMUSG00000003545	Fosb	7	-	19302696	19310051	FBJ osteosarcoma oncogene B [Source:MGI Symbol;Acc:MGI:95575]	protein_coding	0.0349423	0.0804058	0.108766
ENSMUSG00000003546	Klc4	17	-	46630624	46646022	kinesin light chain 4 [Source:MGI Symbol;Acc:MGI:1922014]	protein_coding	2.14731	2.15848	2.1317
ENSMUSG00000003549	Ercc1	7	+	19344778	19356524	excision repair cross-complementing rodent repair deficiency, complementation group 1 [Source:MGI Symbol;Acc:MGI:95412]	protein_coding	2.82936	2.91152	2.89096
ENSMUSG00000003555	Cyp17a1	19	-	46667165	46673172	cytochrome P450, family 17, subfamily a, polypeptide 1 [Source:MGI Symbol;Acc:MGI:88586]	protein_coding	0.00689258	0.0432095	0.0629828
ENSMUSG00000003559	As3mt	19	+	46707458	46741099	arsenic (+3 oxidation state) methyltransferase [Source:MGI Symbol;Acc:MGI:1929882]	protein_coding	6.54992	6.64431	6.81751
ENSMUSG00000003573	Homer3	8	+	70282827	70294361	homer scaffolding protein 3 [Source:MGI Symbol;Acc:MGI:1347359]	protein_coding	4.43399	4.67214	4.71156
ENSMUSG00000003575	Crtc1	8	-	70382355	70439579	CREB regulated transcription coactivator 1 [Source:MGI Symbol;Acc:MGI:2142523]	protein_coding	0.16965	0.213959	0.243254
ENSMUSG00000003581	Rnf215	11	+	4135202	4141172	ring finger protein 215 [Source:MGI Symbol;Acc:MGI:1918923]	protein_coding	0.227736	0.226567	0.202651
ENSMUSG00000003585	Sec14l2	11	-	4097039	4123415	SEC14-like lipid binding 2 [Source:MGI Symbol;Acc:MGI:1915065]	protein_coding	3.98257	4.18757	4.33891
ENSMUSG00000003604	Aven	2	+	112492964	112634573	apoptosis, caspase activation inhibitor [Source:MGI Symbol;Acc:MGI:1921518]	protein_coding	0.478209	0.427287	0.371825
ENSMUSG00000003617	Cp	3	+	19957054	20009145	ceruloplasmin [Source:MGI Symbol;Acc:MGI:88476]	protein_coding	2.16383	2.19212	2.1237
ENSMUSG00000003623	Crot	5	-	8966033	8997324	carnitine O-octanoyltransferase [Source:MGI Symbol;Acc:MGI:1921364]	protein_coding	9.27512	9.90937	10.4833
ENSMUSG00000003644	Rps6ka1	4	-	133847290	133887797	ribosomal protein S6 kinase polypeptide 1 [Source:MGI Symbol;Acc:MGI:104558]	protein_coding	5.22034	5.35306	5.33887
ENSMUSG00000003657	Calb2	8	-	110137502	110168210	calbindin 2 [Source:MGI Symbol;Acc:MGI:101914]	protein_coding	0.393387	0.390219	0.388994
ENSMUSG00000003660	Snrnp200	2	+	127208386	127240451	small nuclear ribonucleoprotein 200 (U5) [Source:MGI Symbol;Acc:MGI:2444401]	protein_coding	11.4551	10.7775	10.3469
ENSMUSG00000003662	Ciao1	2	-	127240938	127247816	cytosolic iron-sulfur protein assembly 1 [Source:MGI Symbol;Acc:MGI:1346998]	protein_coding	0.839518	0.932491	0.966559
ENSMUSG00000003665	Has1	17	-	17843323	17855205	hyaluronan synthase 1 [Source:MGI Symbol;Acc:MGI:106590]	protein_coding	0.430649	0.351983	0.326839
ENSMUSG00000003680	Taf6l	19	-	8774487	8786417	TATA-box binding protein associated factor 6 like [Source:MGI Symbol;Acc:MGI:2444957]	protein_coding	1.97891	2.12369	2.16636
ENSMUSG00000003721	Insig2	1	-	121304353	121332589	insulin induced gene 2 [Source:MGI Symbol;Acc:MGI:1920249]	protein_coding	5.03499	4.7953	4.78276
ENSMUSG00000003731	Kpna6	4	-	129643980	129672767	karyopherin (importin) alpha 6 [Source:MGI Symbol;Acc:MGI:1100836]	protein_coding	1.93854	1.87189	1.92663
ENSMUSG00000003746	Man1a	10	-	53904785	54076609	mannosidase 1, alpha [Source:MGI Symbol;Acc:MGI:104677]	protein_coding	1.00915	0.949261	0.965563
ENSMUSG00000003752	Itpkc	7	-	27207172	27228661	inositol 1,4,5-trisphosphate 3-kinase C [Source:MGI Symbol;Acc:MGI:2442554]	protein_coding	0.21852	0.346366	0.409409
ENSMUSG00000003762	Coq8b	7	+	27233023	27257950	coenzyme Q8B [Source:MGI Symbol;Acc:MGI:1924139]	protein_coding	2.13555	1.9666	1.88007
ENSMUSG00000003778	Brd8	18	-	34598615	34624601	bromodomain containing 8 [Source:MGI Symbol;Acc:MGI:1925906]	protein_coding	25.4648	23.7957	22.4726
ENSMUSG00000003779	Kif20a	18	+	34624613	34633277	kinesin family member 20A [Source:MGI Symbol;Acc:MGI:1201682]	protein_coding	2.81985	3.31121	3.44991
ENSMUSG00000003808	Farsa	8	+	84856989	84869257	phenylalanyl-tRNA synthetase, alpha subunit [Source:MGI Symbol;Acc:MGI:1913840]	protein_coding	35.2702	36.2189	36.3687
ENSMUSG00000003809	Gcdh	8	-	84886393	84893921	glutaryl-Coenzyme A dehydrogenase [Source:MGI Symbol;Acc:MGI:104541]	protein_coding	0.772617	0.77734	0.754061
ENSMUSG00000003810	Mast2	4	-	116306762	116464183	microtubule associated serine/threonine kinase 2 [Source:MGI Symbol;Acc:MGI:894676]	protein_coding	1.83306	1.7323	1.65278
ENSMUSG00000003812	Dnase2a	8	+	84908560	84922915	deoxyribonuclease II alpha [Source:MGI Symbol;Acc:MGI:1329019]	protein_coding	3.99361	4.14139	4.20826
ENSMUSG00000003813	Rad23a	8	-	84834019	84840665	RAD23 homolog A, nucleotide excision repair protein [Source:MGI Symbol;Acc:MGI:105126]	protein_coding	2.29742	2.24427	2.17456
ENSMUSG00000003814	Calr	8	-	84841850	84846934	calreticulin [Source:MGI Symbol;Acc:MGI:88252]	protein_coding	113.29	118.955	122.506
ENSMUSG00000003824	Syce2	8	+	84872111	84888221	synaptonemal complex central element protein 2 [Source:MGI Symbol;Acc:MGI:1919096]	protein_coding	19.3109	20.1115	20.7011
ENSMUSG00000003847	Nfat5	8	+	107293470	107379517	nuclear factor of activated T cells 5 [Source:MGI Symbol;Acc:MGI:1859333]	protein_coding	2.97333	3.02494	3.07885
ENSMUSG00000003848	Nob1	8	-	107412486	107425051	NIN1/RPN12 binding protein 1 homolog [Source:MGI Symbol;Acc:MGI:1914869]	protein_coding	3.34655	3.71101	3.86688
ENSMUSG00000003849	Nqo1	8	-	107388225	107403206	NAD(P)H dehydrogenase, quinone 1 [Source:MGI Symbol;Acc:MGI:103187]	protein_coding	0.654402	0.619887	0.597718
ENSMUSG00000003863	Ppfia3	7	-	45339122	45367019	protein tyrosine phosphatase, receptor type, f polypeptide (PTPRF), interacting protein (liprin), alpha 3 [Source:MGI Symbol;Acc:MGI:1924037]	protein_coding	0.184449	0.199234	0.196108
ENSMUSG00000003865	Gys1	7	+	45434844	45456619	glycogen synthase 1, muscle [Source:MGI Symbol;Acc:MGI:101805]	protein_coding	6.02125	5.60771	5.36549
ENSMUSG00000003868	Ruvbl2	7	-	45421760	45438096	RuvB-like protein 2 [Source:MGI Symbol;Acc:MGI:1342299]	protein_coding	1.15402	0.912435	0.773742
ENSMUSG00000003872	Lin7b	7	-	45367891	45370583	lin-7 homolog B (C. elegans) [Source:MGI Symbol;Acc:MGI:1330858]	protein_coding	0.0560236	0.0272161	0.00858855
ENSMUSG00000003873	Bax	7	-	45461697	45466898	BCL2-associated X protein [Source:MGI Symbol;Acc:MGI:99702]	protein_coding	28.2881	27.0932	26.4324
ENSMUSG00000003882	Il7r	15	-	9505788	9530176	interleukin 7 receptor [Source:MGI Symbol;Acc:MGI:96562]	protein_coding	0.0310936	0.16026	0.21403
ENSMUSG00000003923	Tfam	10	-	71225464	71238280	transcription factor A, mitochondrial [Source:MGI Symbol;Acc:MGI:107810]	protein_coding	0.188936	0.216342	0.232239
ENSMUSG00000003929	Zfp81	17	-	33329342	33358878	zinc finger protein 81 [Source:MGI Symbol;Acc:MGI:1890752]	protein_coding	0.242756	0.28383	0.268365
ENSMUSG00000003934	Efnb3	11	-	69554092	69560205	ephrin B3 [Source:MGI Symbol;Acc:MGI:109196]	protein_coding	0.194615	0.185281	0.177968
ENSMUSG00000003948	Mmd	11	+	90249456	90278589	monocyte to macrophage differentiation-associated [Source:MGI Symbol;Acc:MGI:1914718]	protein_coding	3.86021	5.08865	6.00006
ENSMUSG00000003949	Hlf	11	-	90336536	90390895	hepatic leukemia factor [Source:MGI Symbol;Acc:MGI:96108]	protein_coding	0.0556383	0.225941	0.33205
ENSMUSG00000003955	Fam162a	16	-	36043761	36071594	family with sequence similarity 162, member A [Source:MGI Symbol;Acc:MGI:1917436]	protein_coding	7.06087	6.55729	6.33661
ENSMUSG00000003970	Rpl8	15	+	76904078	76906314	ribosomal protein L8 [Source:MGI Symbol;Acc:MGI:1350927]	protein_coding	793.591	803.746	812.154
ENSMUSG00000003974	Grm3	5	-	9485541	9725170	glutamate receptor, metabotropic 3 [Source:MGI Symbol;Acc:MGI:1351340]	protein_coding	0.0669779	0.082313	0.0817631
ENSMUSG00000003992	Ssbp2	13	+	91460283	91703429	single-stranded DNA binding protein 2 [Source:MGI Symbol;Acc:MGI:1914220]	protein_coding	6.6766	8.1379	9.1944
ENSMUSG00000004018	Fancl	11	+	26386135	26471876	Fanconi anemia, complementation group L [Source:MGI Symbol;Acc:MGI:1914280]	protein_coding	3.45278	3.47489	3.51896
ENSMUSG00000004031	Brinp2	1	-	158245269	158356326	bone morphogenic protein/retinoic acid inducible neural-specific 2 [Source:MGI Symbol;Acc:MGI:2443333]	protein_coding	0.133032	0.0783602	0.0574616
ENSMUSG00000004032	Gstm5	3	+	107895821	107898686	glutathione S-transferase, mu 5 [Source:MGI Symbol;Acc:MGI:1309466]	protein_coding	0.707756	0.733631	0.750544
ENSMUSG00000004035	Gstm7	3	-	107926334	107931817	glutathione S-transferase, mu 7 [Source:MGI Symbol;Acc:MGI:1915562]	protein_coding	0.640586	0.642	0.640085
ENSMUSG00000004038	Gstm3	3	-	107963696	107969283	glutathione S-transferase, mu 3 [Source:MGI Symbol;Acc:MGI:106026]	protein_coding	2.82238	2.74714	2.68863
ENSMUSG00000004040	Stat3	11	-	100885098	100939540	signal transducer and activator of transcription 3 [Source:MGI Symbol;Acc:MGI:103038]	protein_coding	43.4354	41.1478	39.6609
ENSMUSG00000004043	Stat5a	11	+	100859351	100885169	signal transducer and activator of transcription 5A [Source:MGI Symbol;Acc:MGI:103036]	protein_coding	4.02324	4.87891	5.29781
ENSMUSG00000004044	Cavin1	11	-	100956733	100970887	caveolae associated 1 [Source:MGI Symbol;Acc:MGI:1277968]	protein_coding	0.544952	0.729489	0.832217
ENSMUSG00000004054	Map3k11	19	+	5688742	5702865	mitogen-activated protein kinase kinase kinase 11 [Source:MGI Symbol;Acc:MGI:1346880]	protein_coding	0.433929	0.45416	0.442879
ENSMUSG00000004056	Akt2	7	+	27591552	27640826	thymoma viral proto-oncogene 2 [Source:MGI Symbol;Acc:MGI:104874]	protein_coding	2.7654	2.95663	3.05342
ENSMUSG00000004069	Dnaja3	16	+	4639989	4707695	DnaJ heat shock protein family (Hsp40) member A3 [Source:MGI Symbol;Acc:MGI:1933786]	protein_coding	0.76518	0.971212	1.05526
ENSMUSG00000004070	Hmox2	16	+	4726361	4766742	heme oxygenase 2 [Source:MGI Symbol;Acc:MGI:109373]	protein_coding	72.1601	62.3945	57.8644
ENSMUSG00000004071	Cdip1	16	-	4750348	4790292	cell death inducing Trp53 target 1 [Source:MGI Symbol;Acc:MGI:1913876]	protein_coding	2.49578	2.57812	2.58135
ENSMUSG00000004085	Map3k20	2	+	72285637	72442610	mitogen-activated protein kinase kinase kinase 20 [Source:MGI Symbol;Acc:MGI:2443258]	protein_coding	0.195984	0.118748	0.0967468
ENSMUSG00000004096	Cwc15	9	+	14500617	14510577	CWC15 spliceosome-associated protein [Source:MGI Symbol;Acc:MGI:1913320]	protein_coding	10.1171	8.57261	7.90248
ENSMUSG00000004098	Col5a3	9	-	20770050	20815067	collagen, type V, alpha 3 [Source:MGI Symbol;Acc:MGI:1858212]	protein_coding	0.0804341	0.0804556	0.0800357
ENSMUSG00000004099	Dnmt1	9	-	20907209	20959888	DNA methyltransferase (cytosine-5) 1 [Source:MGI Symbol;Acc:MGI:94912]	protein_coding	3.62803	3.74465	3.79238
ENSMUSG00000004100	Ppan	9	+	20888175	20892178	peter pan homolog [Source:MGI Symbol;Acc:MGI:2178445]	protein_coding	1.57778	1.57292	1.57049
ENSMUSG00000004105	Angptl2	2	+	33216069	33247717	angiopoietin-like 2 [Source:MGI Symbol;Acc:MGI:1347002]	protein_coding	0.201513	0.246308	0.250985
ENSMUSG00000004110	Cacna1e	1	-	154390731	154884501	calcium channel, voltage-dependent, R type, alpha 1E subunit [Source:MGI Symbol;Acc:MGI:106217]	protein_coding	0.488335	0.427968	0.421306
ENSMUSG00000004113	Cacna1b	2	-	24603887	24763152	calcium channel, voltage-dependent, N type, alpha 1B subunit [Source:MGI Symbol;Acc:MGI:88296]	protein_coding	0.0633285	0.0458779	0.0461462
ENSMUSG00000004127	Trmt10a	3	+	138143448	138159821	tRNA methyltransferase 10A [Source:MGI Symbol;Acc:MGI:1920421]	protein_coding	0.0220726	0.0523254	0.0755325
ENSMUSG00000004151	Etv1	12	+	38779380	38870484	ets variant 1 [Source:MGI Symbol;Acc:MGI:99254]	protein_coding	0.128049	0.0958347	0.0900238
ENSMUSG00000004187	Kifc2	15	+	76659858	76668196	kinesin family member C2 [Source:MGI Symbol;Acc:MGI:109187]	protein_coding	0.359376	0.298328	0.27967
ENSMUSG00000004207	Psap	10	+	60277627	60302597	prosaposin [Source:MGI Symbol;Acc:MGI:97783]	protein_coding	47.5075	46.7031	46.2474
ENSMUSG00000004221	Ikbkg	X	+	74393290	74453854	inhibitor of kappaB kinase gamma [Source:MGI Symbol;Acc:MGI:1338074]	protein_coding	1.9426	1.90024	1.81537
ENSMUSG00000004231	Pax2	19	+	44756045	44837871	paired box 2 [Source:MGI Symbol;Acc:MGI:97486]	protein_coding	0.123255	0.109456	0.0997408
ENSMUSG00000004233	Wars2	3	+	99141068	99239186	tryptophanyl tRNA synthetase 2 (mitochondrial) [Source:MGI Symbol;Acc:MGI:1917810]	protein_coding	0.304721	0.325108	0.319884
ENSMUSG00000004263	Atn1	6	-	124742544	124756524	atrophin 1 [Source:MGI Symbol;Acc:MGI:104725]	protein_coding	1.05932	1.02914	1.01038
ENSMUSG00000004264	Phb2	6	+	124712336	124716950	prohibitin 2 [Source:MGI Symbol;Acc:MGI:102520]	protein_coding	28.8494	32.2864	33.7635
ENSMUSG00000004266	Ptpn6	6	-	124720707	124738714	protein tyrosine phosphatase, non-receptor type 6 [Source:MGI Symbol;Acc:MGI:96055]	protein_coding	196.987	196.635	194.948
ENSMUSG00000004267	Eno2	6	-	124760053	124769673	enolase 2, gamma neuronal [Source:MGI Symbol;Acc:MGI:95394]	protein_coding	0.805226	0.713616	0.667968
ENSMUSG00000004268	Emg1	6	-	124704085	124712178	EMG1 N1-specific pseudouridine methyltransferase [Source:MGI Symbol;Acc:MGI:1315195]	protein_coding	27.9311	28.0549	28.3974
ENSMUSG00000004270	Lpcat3	6	+	124663027	124704418	lysophosphatidylcholine acyltransferase 3 [Source:MGI Symbol;Acc:MGI:1315211]	protein_coding	12.3756	12.4294	12.615
ENSMUSG00000004285	Atp6v1f	6	+	29467718	29470512	ATPase, H+ transporting, lysosomal V1 subunit F [Source:MGI Symbol;Acc:MGI:1913394]	protein_coding	277.79	279.719	288.293
ENSMUSG00000004296	Il12b	11	+	44400063	44414033	interleukin 12b [Source:MGI Symbol;Acc:MGI:96540]	protein_coding	0.0234024	-0.0191126	-0.00382776
ENSMUSG00000004317	Clcn5	X	-	7153810	7319358	chloride channel, voltage-sensitive 5 [Source:MGI Symbol;Acc:MGI:99486]	protein_coding	0.584915	0.555736	0.560758
ENSMUSG00000004319	Clcn3	8	-	60910389	60983300	chloride channel, voltage-sensitive 3 [Source:MGI Symbol;Acc:MGI:103555]	protein_coding	3.69839	3.67907	3.65238
ENSMUSG00000004328	Hif3a	7	-	17031507	17062427	hypoxia inducible factor 3, alpha subunit [Source:MGI Symbol;Acc:MGI:1859778]	protein_coding	0.049217	0.0259244	0.0175458
ENSMUSG00000004341	Gpx6	13	+	21312125	21319624	glutathione peroxidase 6 [Source:MGI Symbol;Acc:MGI:1922762]	protein_coding	0.0361604	0.100824	0.133708
ENSMUSG00000004344	Gpx5	13	-	21286429	21292731	glutathione peroxidase 5 [Source:MGI Symbol;Acc:MGI:104886]	protein_coding	0.00714839	0.000884751	-0.00797535
ENSMUSG00000004347	Pde1c	6	-	56069804	56652487	phosphodiesterase 1C [Source:MGI Symbol;Acc:MGI:108413]	protein_coding	0.31613	0.289556	0.307851
ENSMUSG00000004356	Utp20	10	-	88746607	88826804	UTP20 small subunit processome component [Source:MGI Symbol;Acc:MGI:1917933]	protein_coding	0.398462	0.418688	0.396098
ENSMUSG00000004359	Spic	10	-	88674772	88685015	Spi-C transcription factor (Spi-1/PU.1 related) [Source:MGI Symbol;Acc:MGI:1341168]	protein_coding	0.126519	0.172462	0.187598
ENSMUSG00000004360	9330159F19Rik	10	+	29211606	29230779	RIKEN cDNA 9330159F19 gene [Source:MGI Symbol;Acc:MGI:3036239]	protein_coding	0.0779319	0.089849	0.0963793
ENSMUSG00000004364	Cul3	1	-	80264923	80340480	cullin 3 [Source:MGI Symbol;Acc:MGI:1347360]	protein_coding	20.9236	21.8815	21.9948
ENSMUSG00000004366	Sst	16	-	23889573	23890958	somatostatin [Source:MGI Symbol;Acc:MGI:98326]	protein_coding	1.91484	1.75441	1.64442
ENSMUSG00000004371	Il11	7	-	4772373	4782859	interleukin 11 [Source:MGI Symbol;Acc:MGI:107613]	protein_coding	-0.0174335	0.00691582	0.0107526
ENSMUSG00000004383	Large1	8	-	72814599	73353540	LARGE xylosyl- and glucuronyltransferase 1 [Source:MGI Symbol;Acc:MGI:1342270]	protein_coding	0.11672	0.114784	0.111056
ENSMUSG00000004393	Ddx56	11	-	6258919	6267772	DEAD (Asp-Glu-Ala-Asp) box polypeptide 56 [Source:MGI Symbol;Acc:MGI:1277172]	protein_coding	0.699796	0.716892	0.739442
ENSMUSG00000004394	Tmed4	11	-	6270369	6274870	transmembrane p24 trafficking protein 4 [Source:MGI Symbol;Acc:MGI:1915070]	protein_coding	3.44583	3.84098	3.94029
ENSMUSG00000004415	Col26a1	5	-	136741759	136883209	collagen, type XXVI, alpha 1 [Source:MGI Symbol;Acc:MGI:2155345]	protein_coding	0.205659	0.198092	0.178528
ENSMUSG00000004446	Bid	6	-	120891930	120916853	BH3 interacting domain death agonist [Source:MGI Symbol;Acc:MGI:108093]	protein_coding	8.47304	8.98924	9.32132
ENSMUSG00000004451	Ralb	1	-	119470305	119504794	v-ral simian leukemia viral oncogene B [Source:MGI Symbol;Acc:MGI:1927244]	protein_coding	12.4197	12.9011	13.2047
ENSMUSG00000004455	Ppp1cc	5	+	122158278	122175273	protein phosphatase 1 catalytic subunit gamma [Source:MGI Symbol;Acc:MGI:104872]	protein_coding	3.57189	3.21204	2.98281
ENSMUSG00000004460	Dnajb11	16	+	22857845	22879634	DnaJ heat shock protein family (Hsp40) member B11 [Source:MGI Symbol;Acc:MGI:1915088]	protein_coding	30.9059	32.3329	33.8675
ENSMUSG00000004462	Tbccd1	16	-	22813214	22857669	TBCC domain containing 1 [Source:MGI Symbol;Acc:MGI:1917823]	protein_coding	1.37575	1.34496	1.36649
ENSMUSG00000004473	Clec11a	7	-	44302687	44306902	C-type lectin domain family 11, member a [Source:MGI Symbol;Acc:MGI:1298219]	protein_coding	0.154716	0.143085	0.139711
ENSMUSG00000004500	Zfp324	7	+	12965838	12974236	zinc finger protein 324 [Source:MGI Symbol;Acc:MGI:2444641]	protein_coding	0.0597754	0.0821509	0.0821976
ENSMUSG00000004508	Gab2	7	+	97081586	97308946	growth factor receptor bound protein 2-associated protein 2 [Source:MGI Symbol;Acc:MGI:1333854]	protein_coding	1.11904	1.11368	1.1205
ENSMUSG00000004530	Coro1c	5	-	113842436	113908758	coronin, actin binding protein 1C [Source:MGI Symbol;Acc:MGI:1345964]	protein_coding	15.1083	17.7183	19.3553
ENSMUSG00000004535	Tax1bp1	6	+	52713729	52766780	Tax1 (human T cell leukemia virus type I) binding protein 1 [Source:MGI Symbol;Acc:MGI:1289308]	protein_coding	52.2122	49.4017	47.7786
ENSMUSG00000004540	Psg17	7	-	18813937	18821607	pregnancy specific glycoprotein 17 [Source:MGI Symbol;Acc:MGI:1347250]	protein_coding	0.0446445	0.0531543	0.0488771
ENSMUSG00000004542	Psg19	7	-	18789567	18798520	pregnancy specific glycoprotein 19 [Source:MGI Symbol;Acc:MGI:1347252]	protein_coding	0.00404646	0.0213504	0.0264516
ENSMUSG00000004552	Ctse	1	+	131638306	131675505	cathepsin E [Source:MGI Symbol;Acc:MGI:107361]	protein_coding	2.50456	2.17989	1.98499
ENSMUSG00000004558	Ndrg2	14	-	51905271	51914158	N-myc downstream regulated gene 2 [Source:MGI Symbol;Acc:MGI:1352498]	protein_coding	5.54317	5.31269	5.27195
ENSMUSG00000004561	Mettl17	14	+	51884842	51893039	methyltransferase like 17 [Source:MGI Symbol;Acc:MGI:1098577]	protein_coding	0.39384	0.431993	0.419549
ENSMUSG00000004562	Arhgef40	14	+	51984719	52006251	Rho guanine nucleotide exchange factor (GEF) 40 [Source:MGI Symbol;Acc:MGI:2685515]	protein_coding	0.117844	0.162416	0.171595
ENSMUSG00000004565	Pnpla6	8	+	3515384	3544267	patatin-like phospholipase domain containing 6 [Source:MGI Symbol;Acc:MGI:1354723]	protein_coding	8.38051	7.88664	7.70982
ENSMUSG00000004567	Mcoln1	8	+	3500457	3515232	mucolipin 1 [Source:MGI Symbol;Acc:MGI:1890498]	protein_coding	19.8095	19.8478	19.8269
ENSMUSG00000004568	Arhgef18	8	+	3353415	3456601	rho/rac guanine nucleotide exchange factor (GEF) 18 [Source:MGI Symbol;Acc:MGI:2142567]	protein_coding	3.17812	3.36349	3.39166
ENSMUSG00000004591	Pkn2	3	-	142790902	142882004	protein kinase N2 [Source:MGI Symbol;Acc:MGI:109211]	protein_coding	20.7017	18.8679	18.054
ENSMUSG00000004609	Cd33	7	-	43524216	43544428	CD33 antigen [Source:MGI Symbol;Acc:MGI:99440]	protein_coding	35.513	37.1932	37.3655
ENSMUSG00000004610	Etfb	7	+	43444083	43457800	electron transferring flavoprotein, beta polypeptide [Source:MGI Symbol;Acc:MGI:106098]	protein_coding	172.002	168.259	167.671
ENSMUSG00000004612	Nkg7	7	+	43437073	43438249	natural killer cell group 7 sequence [Source:MGI Symbol;Acc:MGI:1931250]	protein_coding	4.53702	3.44552	2.8966
ENSMUSG00000004626	Stxbp2	8	+	3630955	3643644	syntaxin binding protein 2 [Source:MGI Symbol;Acc:MGI:107370]	protein_coding	497.87	493.979	502.203
ENSMUSG00000004630	Pcp2	8	-	3623371	3625545	Purkinje cell protein 2 (L7) [Source:MGI Symbol;Acc:MGI:97508]	protein_coding	-0.0118045	0.00313032	0.00878763
ENSMUSG00000004631	Sgce	6	-	4674350	4747207	sarcoglycan, epsilon [Source:MGI Symbol;Acc:MGI:1329042]	protein_coding	0.256149	0.293508	0.299403
ENSMUSG00000004633	Chn2	6	+	54039554	54301810	chimerin 2 [Source:MGI Symbol;Acc:MGI:1917243]	protein_coding	0.831266	0.72611	0.690056
ENSMUSG00000004637	Wwox	8	+	114439655	115352708	WW domain-containing oxidoreductase [Source:MGI Symbol;Acc:MGI:1931237]	protein_coding	2.70229	2.64433	2.5804
ENSMUSG00000004642	Slbp	5	-	33634952	33652574	stem-loop binding protein [Source:MGI Symbol;Acc:MGI:108402]	protein_coding	8.23017	8.69111	9.04351
ENSMUSG00000004651	Tyr	7	-	87424771	87493512	tyrosinase [Source:MGI Symbol;Acc:MGI:98880]	protein_coding	0.0628185	0.000332507	0.000465732
ENSMUSG00000004654	Ghrhr	6	+	55376295	55388530	growth hormone releasing hormone receptor [Source:MGI Symbol;Acc:MGI:95710]	protein_coding	0.0638198	0.0607292	0.0554652
ENSMUSG00000004655	Aqp1	6	+	55336432	55348555	aquaporin 1 [Source:MGI Symbol;Acc:MGI:103201]	protein_coding	2.62486	2.79251	2.88011
ENSMUSG00000004661	Arid3b	9	-	57790353	57836793	AT rich interactive domain 3B (BRIGHT-like) [Source:MGI Symbol;Acc:MGI:1930768]	protein_coding	2.29464	2.29106	2.29372
ENSMUSG00000004665	Cnn2	10	+	79988584	79996062	calponin 2 [Source:MGI Symbol;Acc:MGI:105093]	protein_coding	193.097	155.532	140.404
ENSMUSG00000004667	Polr2e	10	-	80035949	80039795	polymerase (RNA) II (DNA directed) polypeptide E [Source:MGI Symbol;Acc:MGI:1913670]	protein_coding	4.57962	4.37478	4.26556
ENSMUSG00000004668	Abca13	11	+	9191942	9684259	ATP-binding cassette, sub-family A (ABC1), member 13 [Source:MGI Symbol;Acc:MGI:2388707]	protein_coding	1.16917	1.14392	1.13268
ENSMUSG00000004677	Myo9b	8	+	71272714	71360713	myosin IXb [Source:MGI Symbol;Acc:MGI:106624]	protein_coding	3.30146	3.17592	3.09895
ENSMUSG00000004698	Hdac9	12	-	34047580	34917095	histone deacetylase 9 [Source:MGI Symbol;Acc:MGI:1931221]	protein_coding	0.208093	0.157069	0.156671
ENSMUSG00000004707	Ly9	1	-	171588624	171607410	lymphocyte antigen 9 [Source:MGI Symbol;Acc:MGI:96885]	protein_coding	-0.022927	0.0331903	0.0621095
ENSMUSG00000004709	Cd244a	1	+	171559193	171609746	CD244 molecule A [Source:MGI Symbol;Acc:MGI:109294]	protein_coding	0.358315	0.298604	0.226137
ENSMUSG00000004730	Adgre1	17	+	57358691	57483527	adhesion G protein-coupled receptor E1 [Source:MGI Symbol;Acc:MGI:106912]	protein_coding	0.163362	0.191539	0.208777
ENSMUSG00000004748	Mtfp1	11	-	4091480	4095445	mitochondrial fission process 1 [Source:MGI Symbol;Acc:MGI:1916686]	protein_coding	0.514248	0.635615	0.70109
ENSMUSG00000004768	Rab23	1	+	33719887	33742564	RAB23, member RAS oncogene family [Source:MGI Symbol;Acc:MGI:99833]	protein_coding	0.207945	0.1816	0.15857
ENSMUSG00000004771	Rab11a	9	-	64715299	64737758	RAB11A, member RAS oncogene family [Source:MGI Symbol;Acc:MGI:1858202]	protein_coding	81.3475	89.9594	94.3678
ENSMUSG00000004788	Eif2b2	12	+	85219481	85226628	eukaryotic translation initiation factor 2B, subunit 2 beta [Source:MGI Symbol;Acc:MGI:2145118]	protein_coding	1.35992	0.95474	0.743481
ENSMUSG00000004789	Dlst	12	+	85110833	85134845	dihydrolipoamide S-succinyltransferase (E2 component of 2-oxo-glutarate complex) [Source:MGI Symbol;Acc:MGI:1926170]	protein_coding	13.1158	11.7213	11.2298
ENSMUSG00000004791	Pgf	12	-	85166635	85177790	placental growth factor [Source:MGI Symbol;Acc:MGI:105095]	protein_coding	0.20351	0.1678	0.148269
ENSMUSG00000004798	Ulk2	11	-	61775649	61855073	unc-51 like kinase 2 [Source:MGI Symbol;Acc:MGI:1352758]	protein_coding	0.695863	0.718985	0.759283
ENSMUSG00000004814	Ccl24	5	-	135569937	135573049	chemokine (C-C motif) ligand 24 [Source:MGI Symbol;Acc:MGI:1928953]	protein_coding	16.4307	16.9779	17.329
ENSMUSG00000004815	Dgkq	5	-	108646693	108669672	diacylglycerol kinase, theta [Source:MGI Symbol;Acc:MGI:102918]	protein_coding	0.704041	0.723951	0.736928
ENSMUSG00000004821	Tmed11	5	-	108777235	108795363	transmembrane p24 trafficking protein 11 [Source:MGI Symbol;Acc:MGI:1914616]	protein_coding	0.00250237	0.00254766	-0.00503096
ENSMUSG00000004837	Grap	11	+	61653265	61672784	GRB2-related adaptor protein [Source:MGI Symbol;Acc:MGI:1918770]	protein_coding	0.597269	0.66295	0.703103
ENSMUSG00000004842	Pou1f1	16	+	65520511	65535005	POU domain, class 1, transcription factor 1 [Source:MGI Symbol;Acc:MGI:97588]	protein_coding	0.171959	0.113621	0.0990478
ENSMUSG00000004843	Chmp2b	16	-	65539128	65562726	charged multivesicular body protein 2B [Source:MGI Symbol;Acc:MGI:1916192]	protein_coding	19.9866	20.1412	20.1346
ENSMUSG00000004846	Plod3	5	+	136987019	136996648	procollagen-lysine, 2-oxoglutarate 5-dioxygenase 3 [Source:MGI Symbol;Acc:MGI:1347008]	protein_coding	6.99722	7.2338	7.29318
ENSMUSG00000004849	Ap1s1	5	-	137034993	137046135	adaptor protein complex AP-1, sigma 1 [Source:MGI Symbol;Acc:MGI:1098244]	protein_coding	8.23633	8.30475	8.4162
ENSMUSG00000004864	Mapk13	17	+	28769297	28780233	mitogen-activated protein kinase 13 [Source:MGI Symbol;Acc:MGI:1346864]	protein_coding	12.6913	11.4448	10.9982
ENSMUSG00000004865	Srpk1	17	-	28587648	28622709	serine/arginine-rich protein specific kinase 1 [Source:MGI Symbol;Acc:MGI:106908]	protein_coding	12.0411	12.0024	11.9542
ENSMUSG00000004872	Pax3	1	-	78101267	78197134	paired box 3 [Source:MGI Symbol;Acc:MGI:97487]	protein_coding	-0.0116394	0.00748134	0.00426326
ENSMUSG00000004880	Lbr	1	-	181815335	181843046	lamin B receptor [Source:MGI Symbol;Acc:MGI:2138281]	protein_coding	75.873	76.833	77.0446
ENSMUSG00000004885	Crabp2	3	+	87948666	87953376	cellular retinoic acid binding protein II [Source:MGI Symbol;Acc:MGI:88491]	protein_coding	0.491321	0.386295	0.376723
ENSMUSG00000004891	Nes	3	+	87971078	87980451	nestin [Source:MGI Symbol;Acc:MGI:101784]	protein_coding	0.0645388	0.0768562	0.0781756
ENSMUSG00000004892	Bcan	3	-	87987531	88000230	brevican [Source:MGI Symbol;Acc:MGI:1096385]	protein_coding	0.313493	0.367056	0.388895
ENSMUSG00000004894	Hapln2	3	-	88021750	88027583	hyaluronan and proteoglycan link protein 2 [Source:MGI Symbol;Acc:MGI:2137300]	protein_coding	0.175466	0.163599	0.154436
ENSMUSG00000004895	Prcc	3	-	87858903	87885608	papillary renal cell carcinoma (translocation-associated) [Source:MGI Symbol;Acc:MGI:2137738]	protein_coding	0.399271	0.478369	0.494229
ENSMUSG00000004896	Rrnad1	3	-	87922601	87930717	ribosomal RNA adenine dimethylase domain containing 1 [Source:MGI Symbol;Acc:MGI:2387197]	protein_coding	0.339499	0.304323	0.300029
ENSMUSG00000004897	Hdgf	3	+	87906321	87916132	heparin binding growth factor [Source:MGI Symbol;Acc:MGI:1194494]	protein_coding	47.3817	42.9685	41.1447
ENSMUSG00000004902	Slc25a18	6	+	120773578	120794336	solute carrier family 25 (mitochondrial carrier), member 18 [Source:MGI Symbol;Acc:MGI:1919053]	protein_coding	0.173416	0.19402	0.201652
ENSMUSG00000004929	Thop1	10	+	81070035	81082559	thimet oligopeptidase 1 [Source:MGI Symbol;Acc:MGI:1354165]	protein_coding	0.108079	0.167638	0.187664
ENSMUSG00000004931	Apba3	10	+	81266960	81273246	amyloid beta (A4) precursor protein-binding, family A, member 3 [Source:MGI Symbol;Acc:MGI:1888527]	protein_coding	3.45065	3.69468	3.63122
ENSMUSG00000004933	Matk	10	+	81252935	81263365	megakaryocyte-associated tyrosine kinase [Source:MGI Symbol;Acc:MGI:99259]	protein_coding	0.166066	0.264805	0.26935
ENSMUSG00000004934	Pias4	10	-	81153266	81167923	protein inhibitor of activated STAT 4 [Source:MGI Symbol;Acc:MGI:2136940]	protein_coding	4.73366	4.49013	4.37679
ENSMUSG00000004936	Map2k1	9	-	64185770	64253631	mitogen-activated protein kinase kinase 1 [Source:MGI Symbol;Acc:MGI:1346866]	protein_coding	14.0012	12.5857	11.9928
ENSMUSG00000004937	Sgta	10	-	81044075	81060181	small glutamine-rich tetratricopeptide repeat (TPR)-containing, alpha [Source:MGI Symbol;Acc:MGI:1098703]	protein_coding	15.9884	15.6346	15.204
ENSMUSG00000004939	Nmrk2	10	-	81198170	81202051	nicotinamide riboside kinase 2 [Source:MGI Symbol;Acc:MGI:1916814]	protein_coding	0.0905335	0.0450174	0.0183644
ENSMUSG00000004945	Tmem242	17	-	5410870	5440259	transmembrane protein 242 [Source:MGI Symbol;Acc:MGI:1917794]	protein_coding	35.2022	32.1142	31.4844
ENSMUSG00000004947	Dtx2	5	+	135994800	136032872	deltex 2, E3 ubiquitin ligase [Source:MGI Symbol;Acc:MGI:1921448]	protein_coding	0.277275	0.223872	0.19939
ENSMUSG00000004948	Zp3	5	+	135980099	135988624	zona pellucida glycoprotein 3 [Source:MGI Symbol;Acc:MGI:99215]	protein_coding	1.32535	1.18462	1.22072
ENSMUSG00000004951	Hspb1	5	+	135887919	135889563	heat shock protein 1 [Source:MGI Symbol;Acc:MGI:96240]	protein_coding	0.789705	0.862325	0.879879
ENSMUSG00000004952	Rasa4	5	+	136083916	136111860	RAS p21 protein activator 4 [Source:MGI Symbol;Acc:MGI:1858600]	protein_coding	0.579753	0.486098	0.453058
ENSMUSG00000004961	Syt5	7	-	4539765	4547541	synaptotagmin V [Source:MGI Symbol;Acc:MGI:1926368]	protein_coding	0.285999	0.260781	0.252995
ENSMUSG00000004980	Hnrnpa2b1	6	-	51460932	51469894	heterogeneous nuclear ribonucleoprotein A2/B1 [Source:MGI Symbol;Acc:MGI:104819]	protein_coding	590.729	537.346	514.731
ENSMUSG00000004988	Fxyd4	6	-	117933559	117937692	FXYD domain-containing ion transport regulator 4 [Source:MGI Symbol;Acc:MGI:1889005]	protein_coding	0.339245	0.0986463	-0.0159431
ENSMUSG00000004994	Ccdc130	8	-	84257795	84270380	coiled-coil domain containing 130 [Source:MGI Symbol;Acc:MGI:1914986]	protein_coding	0.259015	0.327534	0.334454
ENSMUSG00000004996	Mri1	8	-	84249906	84257326	methylthioribose-1-phosphate isomerase 1 [Source:MGI Symbol;Acc:MGI:1915123]	protein_coding	4.15457	4.34472	4.37809
ENSMUSG00000005034	Prkacb	3	-	146729574	146812990	protein kinase, cAMP dependent, catalytic, beta [Source:MGI Symbol;Acc:MGI:97594]	protein_coding	1.50039	1.58466	1.59395
ENSMUSG00000005043	Sgsh	11	-	119343425	119355536	N-sulfoglucosamine sulfohydrolase (sulfamidase) [Source:MGI Symbol;Acc:MGI:1350341]	protein_coding	-0.126535	0.0638068	0.173419
ENSMUSG00000005045	Chd5	4	+	152338651	152390194	chromodomain helicase DNA binding protein 5 [Source:MGI Symbol;Acc:MGI:3036258]	protein_coding	0.116673	0.116771	0.0956332
ENSMUSG00000005054	Cstb	10	+	78425669	78427622	cystatin B [Source:MGI Symbol;Acc:MGI:109514]	protein_coding	112.713	111.346	109.119
ENSMUSG00000005057	Sh2b2	5	-	136218147	136246556	SH2B adaptor protein 2 [Source:MGI Symbol;Acc:MGI:1345171]	protein_coding	0.308513	0.275082	0.271226
ENSMUSG00000005069	Pex5	6	-	124396816	124415067	peroxisomal biogenesis factor 5 [Source:MGI Symbol;Acc:MGI:1098808]	protein_coding	6.02226	6.176	6.10225
ENSMUSG00000005078	Jkamp	12	+	72085589	72101461	JNK1/MAPK8-associated membrane protein [Source:MGI Symbol;Acc:MGI:1915057]	protein_coding	1.33982	1.31474	1.31576
ENSMUSG00000005087	Cd44	2	-	102811141	102901665	CD44 antigen [Source:MGI Symbol;Acc:MGI:88338]	protein_coding	93.0041	79.7167	73.9466
ENSMUSG00000005089	Slc1a2	2	+	102658659	102790784	solute carrier family 1 (glial high affinity glutamate transporter), member 2 [Source:MGI Symbol;Acc:MGI:101931]	protein_coding	0.515513	0.466812	0.434852
ENSMUSG00000005102	Eif2ak4	2	+	118388618	118475234	eukaryotic translation initiation factor 2 alpha kinase 4 [Source:MGI Symbol;Acc:MGI:1353427]	protein_coding	0.399254	0.360689	0.332852
ENSMUSG00000005103	Wdr1	5	-	38526813	38563221	WD repeat domain 1 [Source:MGI Symbol;Acc:MGI:1337100]	protein_coding	54.9559	57.3148	58.935
ENSMUSG00000005107	Slc2a9	5	-	38349273	38503143	solute carrier family 2 (facilitated glucose transporter), member 9 [Source:MGI Symbol;Acc:MGI:2152844]	protein_coding	8.03197	8.5543	8.56407
ENSMUSG00000005124	Ccn4	15	+	66891320	66923201	cellular communication network factor 4 [Source:MGI Symbol;Acc:MGI:1197008]	protein_coding	0.0915669	0.0177615	0.0112838
ENSMUSG00000005125	Ndrg1	15	-	66929318	66969640	N-myc downstream regulated gene 1 [Source:MGI Symbol;Acc:MGI:1341799]	protein_coding	37.3921	36.8753	36.2504
ENSMUSG00000005131	4930550C14Rik	9	+	53402325	53434402	RIKEN cDNA 4930550C14 gene [Source:MGI Symbol;Acc:MGI:1922561]	protein_coding	0.0916968	0.0639382	0.0464613
ENSMUSG00000005142	Man2b1	8	+	85083270	85098282	mannosidase 2, alpha B1 [Source:MGI Symbol;Acc:MGI:107286]	protein_coding	88.2802	81.7954	77.8396
ENSMUSG00000005148	Klf5	14	+	99298691	99315036	Kruppel-like factor 5 [Source:MGI Symbol;Acc:MGI:1338056]	protein_coding	7.50579	7.31379	7.34318
ENSMUSG00000005150	Wdr83	8	-	85075035	85081306	WD repeat domain containing 83 [Source:MGI Symbol;Acc:MGI:1915086]	protein_coding	1.66335	1.59742	1.60905
ENSMUSG00000005161	Prdx2	8	+	84969587	84974834	peroxiredoxin 2 [Source:MGI Symbol;Acc:MGI:109486]	protein_coding	31.2065	27.5201	26.0981
ENSMUSG00000005198	Polr2a	11	-	69733997	69758637	polymerase (RNA) II (DNA directed) polypeptide A [Source:MGI Symbol;Acc:MGI:98086]	protein_coding	5.77431	5.68336	5.49954
ENSMUSG00000005202	Shbg	11	-	69614804	69617905	sex hormone binding globulin [Source:MGI Symbol;Acc:MGI:98295]	protein_coding	-0.0365247	0.00737438	0.0303114
ENSMUSG00000005204	Senp3	11	-	69673115	69682084	SUMO/sentrin specific peptidase 3 [Source:MGI Symbol;Acc:MGI:2158736]	protein_coding	3.72871	4.23423	4.56271
ENSMUSG00000005220	Corin	5	-	72300025	72504473	corin, serine peptidase [Source:MGI Symbol;Acc:MGI:1349451]	protein_coding	0.0643597	0.0697738	0.0625438
ENSMUSG00000005225	Plekha8	6	+	54595111	54645839	pleckstrin homology domain containing, family A (phosphoinositide binding specific) member 8 [Source:MGI Symbol;Acc:MGI:2681164]	protein_coding	0.123221	0.112277	0.112128
ENSMUSG00000005232	G6pc2	2	+	69211073	69227841	glucose-6-phosphatase, catalytic, 2 [Source:MGI Symbol;Acc:MGI:1277193]	protein_coding	0.544585	0.447291	0.395066
ENSMUSG00000005233	Spc25	2	-	69193895	69206194	SPC25, NDC80 kinetochore complex component, homolog (S. cerevisiae) [Source:MGI Symbol;Acc:MGI:1913692]	protein_coding	3.20373	3.35199	3.36986
ENSMUSG00000005237	Dnah2	11	-	69420809	69549110	dynein, axonemal, heavy chain 2 [Source:MGI Symbol;Acc:MGI:107731]	protein_coding	0.10629	0.12042	0.131362
ENSMUSG00000005251	Ripk4	16	-	97741933	97763787	receptor-interacting serine-threonine kinase 4 [Source:MGI Symbol;Acc:MGI:1919638]	protein_coding	0.198681	0.214289	0.220725
ENSMUSG00000005262	Ufd1	16	+	18811779	18835261	ubiquitin recognition factor in ER-associated degradation 1 [Source:MGI Symbol;Acc:MGI:109353]	protein_coding	5.88405	7.72615	8.95328
ENSMUSG00000005267	Zfp287	11	-	62700356	62731905	zinc finger protein 287 [Source:MGI Symbol;Acc:MGI:2176561]	protein_coding	0.409187	0.376574	0.403682
ENSMUSG00000005268	Prlr	15	+	10177238	10349180	prolactin receptor [Source:MGI Symbol;Acc:MGI:97763]	protein_coding	0.898311	0.761613	0.705488
ENSMUSG00000005299	Letm1	5	-	33739673	33782817	leucine zipper-EF-hand containing transmembrane protein 1 [Source:MGI Symbol;Acc:MGI:1932557]	protein_coding	3.14588	3.2967	3.39954
ENSMUSG00000005312	Ubqln1	13	-	58176156	58215653	ubiquilin 1 [Source:MGI Symbol;Acc:MGI:1860276]	protein_coding	8.89201	7.88753	7.43451
ENSMUSG00000005320	Fgfr4	13	+	55152640	55168759	fibroblast growth factor receptor 4 [Source:MGI Symbol;Acc:MGI:95525]	protein_coding	0.0405992	0.0431107	0.0429383
ENSMUSG00000005338	Cadm3	1	-	173333258	173367695	cell adhesion molecule 3 [Source:MGI Symbol;Acc:MGI:2137858]	protein_coding	0.236541	0.277228	0.2724
ENSMUSG00000005339	Fcer1a	1	-	173221284	173227214	Fc receptor, IgE, high affinity I, alpha polypeptide [Source:MGI Symbol;Acc:MGI:95494]	protein_coding	0.961058	1.00519	1.05414
ENSMUSG00000005354	Txn2	15	-	77915047	77929006	thioredoxin 2 [Source:MGI Symbol;Acc:MGI:1929468]	protein_coding	11.1665	11.4133	11.8762
ENSMUSG00000005355	Casp14	10	-	78711991	78718294	caspase 14 [Source:MGI Symbol;Acc:MGI:1335092]	protein_coding	-0.00499016	0.00242155	0.00258737
ENSMUSG00000005357	Slc1a6	10	+	78780496	78814765	solute carrier family 1 (high affinity aspartate/glutamate transporter), member 6 [Source:MGI Symbol;Acc:MGI:1096331]	protein_coding	0.0205853	-0.00304512	-0.0171773
ENSMUSG00000005360	Slc1a3	15	-	8634124	8710764	solute carrier family 1 (glial high affinity glutamate transporter), member 3 [Source:MGI Symbol;Acc:MGI:99917]	protein_coding	0.548244	0.497905	0.482619
ENSMUSG00000005362	Crbn	6	-	106780201	106800077	cereblon [Source:MGI Symbol;Acc:MGI:1913277]	protein_coding	4.81291	4.9321	5.03321
ENSMUSG00000005364	Il5ra	6	-	106710357	106749037	interleukin 5 receptor, alpha [Source:MGI Symbol;Acc:MGI:96558]	protein_coding	0.0473334	0.0735256	0.0819174
ENSMUSG00000005370	Msh6	17	+	87975062	87990892	mutS homolog 6 [Source:MGI Symbol;Acc:MGI:1343961]	protein_coding	2.15329	2.45973	2.5854
ENSMUSG00000005371	Fbxo11	17	-	87990859	88065291	F-box protein 11 [Source:MGI Symbol;Acc:MGI:2147134]	protein_coding	1.35977	1.37457	1.3544
ENSMUSG00000005373	Mlxipl	5	+	135089890	135138382	MLX interacting protein-like [Source:MGI Symbol;Acc:MGI:1927999]	protein_coding	4.24631	4.0835	3.91593
ENSMUSG00000005374	Tbl2	5	+	135149657	135165760	transducin (beta)-like 2 [Source:MGI Symbol;Acc:MGI:1351652]	protein_coding	0.437684	0.534993	0.547429
ENSMUSG00000005378	Bud23	5	-	135052957	135064959	BUD23, rRNA methyltransferase and ribosome maturation factor [Source:MGI Symbol;Acc:MGI:1913388]	protein_coding	2.08895	2.18098	2.16816
ENSMUSG00000005397	Nid1	13	+	13437551	13512269	nidogen 1 [Source:MGI Symbol;Acc:MGI:97342]	protein_coding	0.233788	0.248592	0.24968
ENSMUSG00000005410	Mcm5	8	+	75109569	75128439	minichromosome maintenance complex component 5 [Source:MGI Symbol;Acc:MGI:103197]	protein_coding	1.9139	2.0994	2.20556
ENSMUSG00000005413	Hmox1	8	+	75093621	75100589	heme oxygenase 1 [Source:MGI Symbol;Acc:MGI:96163]	protein_coding	1.75048	1.65755	1.58753
ENSMUSG00000005417	Mprip	11	+	59661305	59780860	myosin phosphatase Rho interacting protein [Source:MGI Symbol;Acc:MGI:1349438]	protein_coding	5.7202	5.81271	5.73098
ENSMUSG00000005442	Cic	7	+	25267704	25294159	capicua transcriptional repressor [Source:MGI Symbol;Acc:MGI:1918972]	protein_coding	1.34965	1.5585	1.72171
ENSMUSG00000005447	Pafah1b3	7	-	25295049	25297986	platelet-activating factor acetylhydrolase, isoform 1b, subunit 3 [Source:MGI Symbol;Acc:MGI:108414]	protein_coding	0.740553	0.820101	0.860444
ENSMUSG00000005465	Il27ra	8	-	84030294	84042589	interleukin 27 receptor, alpha [Source:MGI Symbol;Acc:MGI:1355318]	protein_coding	-0.0192405	0.0213718	0.0466147
ENSMUSG00000005469	Prkaca	8	+	83972993	83996443	protein kinase, cAMP dependent, catalytic, alpha [Source:MGI Symbol;Acc:MGI:97592]	protein_coding	3.61145	3.7329	3.83468
ENSMUSG00000005470	Asf1b	8	+	83955507	83970197	anti-silencing function 1B histone chaperone [Source:MGI Symbol;Acc:MGI:1914179]	protein_coding	8.84772	7.50669	6.95385
ENSMUSG00000005474	Myl10	5	+	136693146	136701094	myosin, light chain 10, regulatory [Source:MGI Symbol;Acc:MGI:1891705]	protein_coding	-0.0562433	0.0123261	0.0466934
ENSMUSG00000005481	Ddx39	8	+	83715177	83726892	DEAD (Asp-Glu-Ala-Asp) box polypeptide 39 [Source:MGI Symbol;Acc:MGI:1915528]	protein_coding	3.7467	3.73308	3.67413
ENSMUSG00000005483	Dnajb1	8	+	83608193	83612653	DnaJ heat shock protein family (Hsp40) member B1 [Source:MGI Symbol;Acc:MGI:1931874]	protein_coding	18.6388	19.8394	20.6156
ENSMUSG00000005493	Msh4	3	-	153857149	153906138	mutS homolog 4 [Source:MGI Symbol;Acc:MGI:1860077]	protein_coding	0.19922	0.131477	0.133933
ENSMUSG00000005501	Usp40	1	-	87945119	88008551	ubiquitin specific peptidase 40 [Source:MGI Symbol;Acc:MGI:2443184]	protein_coding	0.611685	0.545742	0.564831
ENSMUSG00000005503	Evx1	6	+	52313498	52318378	even-skipped homeobox 1 [Source:MGI Symbol;Acc:MGI:95461]	protein_coding	0.117528	0.107708	0.103238
ENSMUSG00000005505	Kbtbd4	2	+	90904740	90911626	kelch repeat and BTB (POZ) domain containing 4 [Source:MGI Symbol;Acc:MGI:1914386]	protein_coding	0.205043	0.28823	0.340921
ENSMUSG00000005506	Celf1	2	+	90940382	91019497	CUGBP, Elav-like family member 1 [Source:MGI Symbol;Acc:MGI:1342295]	protein_coding	7.49241	7.76058	7.8513
ENSMUSG00000005510	Ndufs3	2	-	90894634	90904827	NADH:ubiquinone oxidoreductase core subunit S3 [Source:MGI Symbol;Acc:MGI:1915599]	protein_coding	28.6593	30.5021	30.7682
ENSMUSG00000005514	Por	5	+	135670033	135735326	P450 (cytochrome) oxidoreductase [Source:MGI Symbol;Acc:MGI:97744]	protein_coding	37.2455	36.1722	35.7126
ENSMUSG00000005533	Igf1r	7	+	67952827	68233668	insulin-like growth factor I receptor [Source:MGI Symbol;Acc:MGI:96433]	protein_coding	14.9363	15.9488	16.4141
ENSMUSG00000005534	Insr	8	-	3122061	3279617	insulin receptor [Source:MGI Symbol;Acc:MGI:96575]	protein_coding	5.10286	5.15893	5.18582
ENSMUSG00000005540	Fcer2a	8	-	3681737	3694175	Fc receptor, IgE, low affinity II, alpha polypeptide [Source:MGI Symbol;Acc:MGI:95497]	protein_coding	0.0681586	0.0893931	0.0980145
ENSMUSG00000005547	Cyp2a5	7	+	26835305	26843548	cytochrome P450, family 2, subfamily a, polypeptide 5 [Source:MGI Symbol;Acc:MGI:88597]	protein_coding	0.123921	0.13813	0.13302
ENSMUSG00000005553	Atp4a	7	+	30712209	30725534	ATPase, H+/K+ exchanging, gastric, alpha polypeptide [Source:MGI Symbol;Acc:MGI:88113]	protein_coding	0.00931602	0.0147902	0.0169129
ENSMUSG00000005566	Trim28	7	+	12999114	13031035	tripartite motif-containing 28 [Source:MGI Symbol;Acc:MGI:109274]	protein_coding	14.4881	13.3403	12.9903
ENSMUSG00000005575	Ube2m	7	-	13035120	13038275	ubiquitin-conjugating enzyme E2M [Source:MGI Symbol;Acc:MGI:108278]	protein_coding	2.68796	2.63774	2.6023
ENSMUSG00000005580	Adcy9	16	-	4287529	4420498	adenylate cyclase 9 [Source:MGI Symbol;Acc:MGI:108450]	protein_coding	0.258922	0.208928	0.177298
ENSMUSG00000005583	Mef2c	13	+	83504034	83667080	myocyte enhancer factor 2C [Source:MGI Symbol;Acc:MGI:99458]	protein_coding	1.30448	1.40786	1.49804
ENSMUSG00000005609	Ctr9	7	+	111028951	111056377	CTR9 homolog, Paf1/RNA polymerase II complex component [Source:MGI Symbol;Acc:MGI:109345]	protein_coding	5.02344	5.06614	5.14329
ENSMUSG00000005610	Eif4g2	7	-	111067750	111083030	eukaryotic translation initiation factor 4, gamma 2 [Source:MGI Symbol;Acc:MGI:109207]	protein_coding	24.667	27.2507	28.738
ENSMUSG00000005611	Mrvi1	7	-	110868266	110982461	MRV integration site 1 [Source:MGI Symbol;Acc:MGI:1338023]	protein_coding	0.693192	0.829001	0.914271
ENSMUSG00000005615	Pcyt1a	16	+	32430921	32475070	phosphate cytidylyltransferase 1, choline, alpha isoform [Source:MGI Symbol;Acc:MGI:88557]	protein_coding	5.16913	5.24135	5.32138
ENSMUSG00000005621	Zfp592	7	+	80993681	81045164	zinc finger protein 592 [Source:MGI Symbol;Acc:MGI:2443541]	protein_coding	0.494913	0.477537	0.473124
ENSMUSG00000005625	Psmd4	3	-	95032694	95042614	proteasome (prosome, macropain) 26S subunit, non-ATPase, 4 [Source:MGI Symbol;Acc:MGI:1201670]	protein_coding	171.122	182.705	189.189
ENSMUSG00000005628	Tmod4	3	+	95124476	95129209	tropomodulin 4 [Source:MGI Symbol;Acc:MGI:1355285]	protein_coding	1.702	1.75263	1.80369
ENSMUSG00000005640	Insrr	3	+	87796951	87816101	insulin receptor-related receptor [Source:MGI Symbol;Acc:MGI:1346037]	protein_coding	0.217034	0.179319	0.157504
ENSMUSG00000005649	Cabp5	7	+	13398132	13408887	calcium binding protein 5 [Source:MGI Symbol;Acc:MGI:1352746]	protein_coding	0.077353	0.0500631	0.0336999
ENSMUSG00000005656	Snx6	12	-	54746349	54795703	sorting nexin 6 [Source:MGI Symbol;Acc:MGI:1919433]	protein_coding	45.3577	41.3311	39.7337
ENSMUSG00000005667	Mthfd2	6	-	83305691	83325908	methylenetetrahydrofolate dehydrogenase (NAD+ dependent), methenyltetrahydrofolate cyclohydrolase [Source:MGI Symbol;Acc:MGI:1338850]	protein_coding	1.06814	1.12304	1.14059
ENSMUSG00000005672	Kit	5	+	75574916	75656722	KIT proto-oncogene receptor tyrosine kinase [Source:MGI Symbol;Acc:MGI:96677]	protein_coding	12.3667	12.4609	12.494
ENSMUSG00000005674	Tomm40l	1	-	171216011	171222514	translocase of outer mitochondrial membrane 40-like [Source:MGI Symbol;Acc:MGI:3589112]	protein_coding	0.268228	0.270315	0.234647
ENSMUSG00000005677	Nr1i3	1	+	171213970	171220701	nuclear receptor subfamily 1, group I, member 3 [Source:MGI Symbol;Acc:MGI:1346307]	protein_coding	0.653724	0.678825	0.682843
ENSMUSG00000005681	Apoa2	1	+	171225054	171226379	apolipoprotein A-II [Source:MGI Symbol;Acc:MGI:88050]	protein_coding	2.34818	2.35255	2.33096
ENSMUSG00000005682	Pan2	10	+	128303335	128321358	PAN2 poly(A) specific ribonuclease subunit [Source:MGI Symbol;Acc:MGI:1918984]	protein_coding	1.22321	1.15114	1.1479
ENSMUSG00000005683	Cs	10	+	128337734	128362479	citrate synthase [Source:MGI Symbol;Acc:MGI:88529]	protein_coding	15.0999	16.8842	17.4223
ENSMUSG00000005686	Ampd3	7	+	110768206	110812405	adenosine monophosphate deaminase 3 [Source:MGI Symbol;Acc:MGI:1096344]	protein_coding	1.12651	1.27892	1.30397
ENSMUSG00000005687	Bcas2	3	+	103171655	103179166	breast carcinoma amplified sequence 2 [Source:MGI Symbol;Acc:MGI:1915433]	protein_coding	63.5893	68.574	70.856
ENSMUSG00000005696	Sh2d1a	X	+	42502453	42529330	SH2 domain containing 1A [Source:MGI Symbol;Acc:MGI:1328352]	protein_coding	0.270029	0.0736369	-0.00982304
ENSMUSG00000005698	Ctcf	8	+	105636568	105682922	CCCTC-binding factor [Source:MGI Symbol;Acc:MGI:109447]	protein_coding	5.62682	5.01342	4.74362
ENSMUSG00000005699	Pard6a	8	+	105701148	105703496	par-6 family cell polarity regulator alpha [Source:MGI Symbol;Acc:MGI:1927223]	protein_coding	0.0491478	0.141351	0.157867
ENSMUSG00000005705	Agrp	8	-	105566698	105637393	agouti related neuropeptide [Source:MGI Symbol;Acc:MGI:892013]	protein_coding	0.0849085	0.0413257	0.0203921
ENSMUSG00000005716	Pvalb	15	-	78191114	78206400	parvalbumin [Source:MGI Symbol;Acc:MGI:97821]	protein_coding	2.87959	2.64126	2.50631
ENSMUSG00000005718	Tfap4	16	-	4544661	4559854	transcription factor AP4 [Source:MGI Symbol;Acc:MGI:103239]	protein_coding	0.210491	0.072708	0.0184286
ENSMUSG00000005732	Ranbp1	16	-	18239784	18248732	RAN binding protein 1 [Source:MGI Symbol;Acc:MGI:96269]	protein_coding	119.309	127.253	132.433
ENSMUSG00000005763	Cd247	1	+	165788681	165877277	CD247 antigen [Source:MGI Symbol;Acc:MGI:88334]	protein_coding	-0.12141	0.0242505	0.111239
ENSMUSG00000005774	Rfx5	3	+	94954075	94961561	regulatory factor X, 5 (influences HLA class II expression) [Source:MGI Symbol;Acc:MGI:1858421]	protein_coding	0.186816	0.199161	0.227991
ENSMUSG00000005779	Psmb4	3	-	94884093	94886961	proteasome (prosome, macropain) subunit, beta type 4 [Source:MGI Symbol;Acc:MGI:1098257]	protein_coding	36.2306	29.8432	27.0049
ENSMUSG00000005800	Mmp8	9	+	7558456	7568485	matrix metallopeptidase 8 [Source:MGI Symbol;Acc:MGI:1202395]	protein_coding	95.0692	90.1432	88.7978
ENSMUSG00000005802	Slc30a4	2	-	122681233	122702663	solute carrier family 30 (zinc transporter), member 4 [Source:MGI Symbol;Acc:MGI:1345282]	protein_coding	0.377863	0.345487	0.333356
ENSMUSG00000005803	Sqor	2	+	122765237	122809569	sulfide quinone oxidoreductase [Source:MGI Symbol;Acc:MGI:1929899]	protein_coding	61.2763	53.9675	50.3797
ENSMUSG00000005804	Bloc1s6	2	+	122738503	122749475	biogenesis of lysosomal organelles complex-1, subunit 6, pallidin [Source:MGI Symbol;Acc:MGI:1927580]	protein_coding	7.99525	8.91859	9.2142
ENSMUSG00000005813	Metap1	3	-	138458956	138489515	methionyl aminopeptidase 1 [Source:MGI Symbol;Acc:MGI:1922874]	protein_coding	1.83295	1.88324	1.91948
ENSMUSG00000005823	Gpr108	17	-	57234635	57248446	G protein-coupled receptor 108 [Source:MGI Symbol;Acc:MGI:1925558]	protein_coding	4.75531	4.03101	3.68867
ENSMUSG00000005824	Tnfsf14	17	-	57189492	57194177	tumor necrosis factor (ligand) superfamily, member 14 [Source:MGI Symbol;Acc:MGI:1355317]	protein_coding	1.89854	1.89183	1.83032
ENSMUSG00000005836	Gata6	18	+	11052064	11085635	GATA binding protein 6 [Source:MGI Symbol;Acc:MGI:107516]	protein_coding	0.481269	0.332461	0.354027
ENSMUSG00000005846	Rsl1d1	16	-	11192970	11203331	ribosomal L1 domain containing 1 [Source:MGI Symbol;Acc:MGI:1913659]	protein_coding	25.6617	29.3769	31.1525
ENSMUSG00000005864	Cnga2	X	+	71991849	72010218	cyclic nucleotide gated channel alpha 2 [Source:MGI Symbol;Acc:MGI:108040]	protein_coding	0.00727297	0.0024468	-0.00964367
ENSMUSG00000005871	Apc	18	+	34220924	34322552	APC, WNT signaling pathway regulator [Source:MGI Symbol;Acc:MGI:88039]	protein_coding	0.396474	0.442144	0.471924
ENSMUSG00000005873	Reep5	18	-	34344885	34374070	receptor accessory protein 5 [Source:MGI Symbol;Acc:MGI:1270152]	protein_coding	4.68174	4.9841	5.09838
ENSMUSG00000005881	Ergic3	2	+	156008045	156018279	ERGIC and golgi 3 [Source:MGI Symbol;Acc:MGI:1913616]	protein_coding	12.4287	11.6771	11.6571
ENSMUSG00000005882	Uqcc1	2	-	155846894	155930310	ubiquinol-cytochrome c reductase complex assembly factor 1 [Source:MGI Symbol;Acc:MGI:1929472]	protein_coding	0.365869	0.417697	0.460897
ENSMUSG00000005883	Spo11	2	+	172977700	172993576	SPO11 meiotic protein covalently bound to DSB [Source:MGI Symbol;Acc:MGI:1349669]	protein_coding	0.118972	0.130065	0.130167
ENSMUSG00000005886	Ncoa2	1	-	13139105	13374083	nuclear receptor coactivator 2 [Source:MGI Symbol;Acc:MGI:1276533]	protein_coding	10.8541	10.2819	9.83892
ENSMUSG00000005891	Prl4a1	13	+	28016212	28023559	prolactin family 4, subfamily a, member 1 [Source:MGI Symbol;Acc:MGI:1206587]	protein_coding	0.0387608	0.0300885	0.026915
ENSMUSG00000005892	Trh	6	-	92242061	92244650	thyrotropin releasing hormone [Source:MGI Symbol;Acc:MGI:98823]	protein_coding	0.00034617	0.00188906	-0.0022309
ENSMUSG00000005893	Nr2c2	6	+	92091390	92174294	nuclear receptor subfamily 2, group C, member 2 [Source:MGI Symbol;Acc:MGI:1352466]	protein_coding	4.72551	5.4851	5.80751
ENSMUSG00000005897	Nr2c1	10	+	94148023	94197211	nuclear receptor subfamily 2, group C, member 1 [Source:MGI Symbol;Acc:MGI:1352465]	protein_coding	0.265042	0.105728	0.0275969
ENSMUSG00000005899	Smpd4	16	+	17619354	17644828	sphingomyelin phosphodiesterase 4 [Source:MGI Symbol;Acc:MGI:1924876]	protein_coding	0.210895	0.212961	0.215228
ENSMUSG00000005907	Pex1	5	+	3596066	3637232	peroxisomal biogenesis factor 1 [Source:MGI Symbol;Acc:MGI:1918632]	protein_coding	2.02984	2.08613	2.11483
ENSMUSG00000005917	Otx1	11	-	21994764	22002897	orthodenticle homeobox 1 [Source:MGI Symbol;Acc:MGI:97450]	protein_coding	-0.00157637	0.0219457	0.0301433
ENSMUSG00000005936	Kctd20	17	+	28951950	28969549	potassium channel tetramerisation domain containing 20 [Source:MGI Symbol;Acc:MGI:1914239]	protein_coding	30.704	30.8533	30.9715
ENSMUSG00000005947	Itgae	11	+	73090583	73147446	integrin alpha E, epithelial-associated [Source:MGI Symbol;Acc:MGI:1298377]	protein_coding	0.0488848	0.0482648	0.0485551
ENSMUSG00000005949	Ctns	11	-	73183596	73199042	cystinosis, nephropathic [Source:MGI Symbol;Acc:MGI:1932872]	protein_coding	2.46933	2.47772	2.43504
ENSMUSG00000005950	P2rx5	11	+	73160421	73172685	purinergic receptor P2X, ligand-gated ion channel, 5 [Source:MGI Symbol;Acc:MGI:2137026]	protein_coding	0.0171073	-0.00240431	-0.01445
ENSMUSG00000005951	Shpk	11	+	73199460	73224511	sedoheptulokinase [Source:MGI Symbol;Acc:MGI:1921887]	protein_coding	0.665587	0.651127	0.656637
ENSMUSG00000005952	Trpv1	11	+	73234292	73261242	transient receptor potential cation channel, subfamily V, member 1 [Source:MGI Symbol;Acc:MGI:1341787]	protein_coding	0.0480628	0.0268554	0.023371
ENSMUSG00000005958	Ephb3	16	+	21204755	21223305	Eph receptor B3 [Source:MGI Symbol;Acc:MGI:104770]	protein_coding	0.0889037	0.0824853	0.0767849
ENSMUSG00000005968	Tuft1	3	-	94612757	94658872	tuftelin 1 [Source:MGI Symbol;Acc:MGI:109572]	protein_coding	0.50894	0.541525	0.560502
ENSMUSG00000005973	Rcn1	2	-	105386291	105399319	reticulocalbin 1 [Source:MGI Symbol;Acc:MGI:104559]	protein_coding	2.66575	2.3811	2.29974
ENSMUSG00000005980	Dnase1	16	+	4036942	4040024	deoxyribonuclease I [Source:MGI Symbol;Acc:MGI:103157]	protein_coding	1.70909	1.75146	1.75919
ENSMUSG00000005981	Trap1	16	-	4039971	4077827	TNF receptor-associated protein 1 [Source:MGI Symbol;Acc:MGI:1915265]	protein_coding	3.46289	3.21483	3.05451
ENSMUSG00000005982	Naa60	16	+	3872375	3904770	N(alpha)-acetyltransferase 60, NatF catalytic subunit [Source:MGI Symbol;Acc:MGI:1922013]	protein_coding	3.6687	3.73251	3.75811
ENSMUSG00000005983	1700037C18Rik	16	-	3895179	3908689	RIKEN cDNA 1700037C18 gene [Source:MGI Symbol;Acc:MGI:1920511]	protein_coding	2.14234	2.22002	2.21689
ENSMUSG00000005986	Ankrd13d	19	-	4270180	4283137	ankyrin repeat domain 13 family, member D [Source:MGI Symbol;Acc:MGI:1915673]	protein_coding	1.5652	1.42242	1.36713
ENSMUSG00000005994	Tyrp1	4	+	80834123	80851719	tyrosinase-related protein 1 [Source:MGI Symbol;Acc:MGI:98881]	protein_coding	0.0591371	0.0475557	0.0327911
ENSMUSG00000006005	Tpr	1	+	150392838	150449935	translocated promoter region, nuclear basket protein [Source:MGI Symbol;Acc:MGI:1922066]	protein_coding	9.91492	10.2941	10.4756
ENSMUSG00000006007	Pdc	1	+	150319417	150333906	phosducin [Source:MGI Symbol;Acc:MGI:98090]	protein_coding	0.324166	0.328999	0.325736
ENSMUSG00000006010	Odr4	1	-	150361305	150393080	odr4 GPCR localization factor homolog [Source:MGI Symbol;Acc:MGI:2385108]	protein_coding	3.02494	3.22567	3.32573
ENSMUSG00000006014	Prg4	1	-	150449412	150466165	proteoglycan 4 (megakaryocyte stimulating factor, articular superficial zone protein) [Source:MGI Symbol;Acc:MGI:1891344]	protein_coding	0.150748	0.165851	0.170708
ENSMUSG00000006019	Dhx34	7	-	16197147	16222037	DEAH (Asp-Glu-Ala-His) box polypeptide 34 [Source:MGI Symbol;Acc:MGI:1918973]	protein_coding	0.765711	0.668775	0.624846
ENSMUSG00000006021	Kptn	7	+	16119895	16127516	kaptin [Source:MGI Symbol;Acc:MGI:1890380]	protein_coding	0.264316	0.290609	0.312377
ENSMUSG00000006024	Napa	7	+	16098458	16117975	N-ethylmaleimide sensitive fusion protein attachment protein alpha [Source:MGI Symbol;Acc:MGI:104563]	protein_coding	5.30272	4.96758	4.83357
ENSMUSG00000006050	Sra1	18	-	36666681	36670815	steroid receptor RNA activator 1 [Source:MGI Symbol;Acc:MGI:1344414]	protein_coding	105.52	100.159	98.1298
ENSMUSG00000006056	Calcoco2	11	-	96099326	96111964	calcium binding and coiled-coil domain 2 [Source:MGI Symbol;Acc:MGI:1343177]	protein_coding	0.008798	-0.00137645	-0.00735494
ENSMUSG00000006057	Atp5g1	11	-	96068852	96075670	ATP synthase, H+ transporting, mitochondrial F0 complex, subunit C1 (subunit 9) [Source:MGI Symbol;Acc:MGI:107653]	protein_coding	22.9283	23.8915	24.4129
ENSMUSG00000006058	Snf8	11	+	96034885	96047430	SNF8, ESCRT-II complex subunit, homolog (S. cerevisiae) [Source:MGI Symbol;Acc:MGI:1343161]	protein_coding	50.3015	47.1923	45.0615
ENSMUSG00000006095	Tbcb	7	-	30224131	30232272	tubulin folding cofactor B [Source:MGI Symbol;Acc:MGI:1913661]	protein_coding	38.9504	30.313	26.4899
ENSMUSG00000006127	Inpp5k	11	+	75630988	75648871	inositol polyphosphate 5-phosphatase K [Source:MGI Symbol;Acc:MGI:1194899]	protein_coding	4.57367	4.82027	4.89187
ENSMUSG00000006134	Crkl	16	+	17451987	17487434	v-crk avian sarcoma virus CT10 oncogene homolog-like [Source:MGI Symbol;Acc:MGI:104686]	protein_coding	2.29083	2.6094	2.80754
ENSMUSG00000006143	Upk3bl	5	+	136054492	136064326	uroplakin 3B-like [Source:MGI Symbol;Acc:MGI:1916915]	protein_coding	0.0501352	0.0530503	0.0518054
ENSMUSG00000006154	Eps8l1	7	+	4460674	4480487	EPS8-like 1 [Source:MGI Symbol;Acc:MGI:1914675]	protein_coding	-0.000786035	0.0385454	0.0551849
ENSMUSG00000006169	Clint1	11	+	45851964	45910625	clathrin interactor 1 [Source:MGI Symbol;Acc:MGI:2144243]	protein_coding	16.5627	16.979	17.0342
ENSMUSG00000006179	Prss16	13	-	22002173	22009742	protease, serine 16 (thymus) [Source:MGI Symbol;Acc:MGI:1859181]	protein_coding	1.26043	1.3492	1.35347
ENSMUSG00000006191	Cdkal1	13	-	29191746	29855674	CDK5 regulatory subunit associated protein 1-like 1 [Source:MGI Symbol;Acc:MGI:1921765]	protein_coding	0.245041	0.217869	0.227086
ENSMUSG00000006200	Rhox6	X	+	37826910	37829857	reproductive homeobox 6 [Source:MGI Symbol;Acc:MGI:1202888]	protein_coding	0.00282001	-0.000400247	-0.0024128
ENSMUSG00000006204	Cdcp3	7	+	131174402	131306451	CUB domain containing protein 3 [Source:MGI Symbol;Acc:MGI:1918645]	protein_coding	0.0375374	0.0172344	0.0204857
ENSMUSG00000006205	Htra1	7	+	130936111	130985660	HtrA serine peptidase 1 [Source:MGI Symbol;Acc:MGI:1929076]	protein_coding	0.762282	0.860243	0.940138
ENSMUSG00000006215	Zbtb17	4	+	141444654	141467930	zinc finger and BTB domain containing 17 [Source:MGI Symbol;Acc:MGI:107410]	protein_coding	1.39217	1.33966	1.29837
ENSMUSG00000006216	Clcnkb	4	-	141404353	141416014	chloride channel, voltage-sensitive Kb [Source:MGI Symbol;Acc:MGI:1930643]	protein_coding	0.00712527	0.00996554	0.0164922
ENSMUSG00000006218	Fam131c	4	+	141368220	141384175	family with sequence similarity 131, member C [Source:MGI Symbol;Acc:MGI:2685539]	protein_coding	0.041692	0.0682581	0.0819827
ENSMUSG00000006219	Fblim1	4	-	141576062	141606096	filamin binding LIM protein 1 [Source:MGI Symbol;Acc:MGI:1921452]	protein_coding	0.762208	0.730851	0.717617
ENSMUSG00000006221	Hspb7	4	+	141420779	141425311	heat shock protein family, member 7 (cardiovascular) [Source:MGI Symbol;Acc:MGI:1352494]	protein_coding	0.428518	0.440656	0.447747
ENSMUSG00000006235	Epor	9	-	21958897	21963506	erythropoietin receptor [Source:MGI Symbol;Acc:MGI:95408]	protein_coding	0.396406	0.551365	0.636939
ENSMUSG00000006241	Ccdc159	9	+	21927471	21935872	coiled-coil domain containing 159 [Source:MGI Symbol;Acc:MGI:1914369]	protein_coding	0.0263349	-0.0180488	-0.00775031
ENSMUSG00000006262	Mob1b	5	+	88720855	88764220	MOB kinase activator 1B [Source:MGI Symbol;Acc:MGI:1915723]	protein_coding	1.82356	2.05481	2.17514
ENSMUSG00000006269	Atp6v1b1	6	+	83742990	83758855	ATPase, H+ transporting, lysosomal V1 subunit B1 [Source:MGI Symbol;Acc:MGI:103285]	protein_coding	0.0518877	0.0869484	0.107979
ENSMUSG00000006270	Vax1	19	-	59166187	59170056	ventral anterior homeobox 1 [Source:MGI Symbol;Acc:MGI:1277163]	protein_coding	0.00620238	-0.000627729	-0.0055399
ENSMUSG00000006273	Atp6v1b2	8	+	69088646	69113711	ATPase, H+ transporting, lysosomal V1 subunit B2 [Source:MGI Symbol;Acc:MGI:109618]	protein_coding	89.7256	82.5473	78.9714
ENSMUSG00000006276	Eps15l1	8	-	72340999	72421460	epidermal growth factor receptor pathway substrate 15-like 1 [Source:MGI Symbol;Acc:MGI:104582]	protein_coding	1.77679	1.86982	1.88259
ENSMUSG00000006281	Tep1	14	-	50824059	50870560	telomerase associated protein 1 [Source:MGI Symbol;Acc:MGI:109573]	protein_coding	0.88763	0.875941	0.850998
ENSMUSG00000006288	Ttc5	14	-	50765415	50785519	tetratricopeptide repeat domain 5 [Source:MGI Symbol;Acc:MGI:2683584]	protein_coding	3.48762	3.538	3.6728
ENSMUSG00000006289	Osgep	14	-	50906478	50924893	O-sialoglycoprotein endopeptidase [Source:MGI Symbol;Acc:MGI:1913496]	protein_coding	10.0361	9.29438	9.19681
ENSMUSG00000006299	Aamp	1	-	74279840	74284738	angio-associated migratory protein [Source:MGI Symbol;Acc:MGI:107809]	protein_coding	21.7584	20.7094	20.2332
ENSMUSG00000006301	Tmbim1	1	-	74288247	74305622	transmembrane BAX inhibitor motif containing 1 [Source:MGI Symbol;Acc:MGI:1916910]	protein_coding	2.6917	2.52067	2.53612
ENSMUSG00000006304	Arpc2	1	+	74236084	74268209	actin related protein 2/3 complex, subunit 2 [Source:MGI Symbol;Acc:MGI:1923959]	protein_coding	408.296	411.726	414.845
ENSMUSG00000006307	Kmt2b	7	-	30568858	30588726	lysine (K)-specific methyltransferase 2B [Source:MGI Symbol;Acc:MGI:109565]	protein_coding	4.167	4.13521	4.12238
ENSMUSG00000006310	Zbtb32	7	-	30589681	30598909	zinc finger and BTB domain containing 32 [Source:MGI Symbol;Acc:MGI:1891838]	protein_coding	0.0407353	0.0811508	0.103315
ENSMUSG00000006311	Etv2	7	-	30633616	30635852	ets variant 2 [Source:MGI Symbol;Acc:MGI:99253]	protein_coding	-0.0113401	0.00269763	0.00874898
ENSMUSG00000006313	Upk1a	7	-	30603092	30612847	uroplakin 1A [Source:MGI Symbol;Acc:MGI:98911]	protein_coding	2.33077	2.45802	2.44492
ENSMUSG00000006315	Tmem147	7	-	30727701	30729540	transmembrane protein 147 [Source:MGI Symbol;Acc:MGI:1915011]	protein_coding	25.8481	23.2003	21.956
ENSMUSG00000006333	Rps9	7	+	3703993	3706897	ribosomal protein S9 [Source:MGI Symbol;Acc:MGI:1924096]	protein_coding	1035.48	961.505	928.927
ENSMUSG00000006335	Tfpt	7	-	3620324	3629929	TCF3 (E2A) fusion partner [Source:MGI Symbol;Acc:MGI:1916964]	protein_coding	0.436612	0.488554	0.504676
ENSMUSG00000006342	Susd2	10	-	75636706	75644008	sushi domain containing 2 [Source:MGI Symbol;Acc:MGI:1918983]	protein_coding	1.41608	1.45218	1.43964
ENSMUSG00000006344	Ggt5	10	+	75589340	75617200	gamma-glutamyltransferase 5 [Source:MGI Symbol;Acc:MGI:1346063]	protein_coding	0.745319	0.757982	0.733082
ENSMUSG00000006345	Ggt1	10	+	75561604	75586200	gamma-glutamyltransferase 1 [Source:MGI Symbol;Acc:MGI:95706]	protein_coding	7.60345	7.81231	7.96525
ENSMUSG00000006356	Crip2	12	+	113140236	113145506	cysteine rich protein 2 [Source:MGI Symbol;Acc:MGI:1915587]	protein_coding	0.961639	1.07825	1.13963
ENSMUSG00000006360	Crip1	12	+	113146316	113153879	cysteine-rich protein 1 (intestinal) [Source:MGI Symbol;Acc:MGI:88501]	protein_coding	24.5058	28.6449	30.9334
ENSMUSG00000006362	Cbfa2t3	8	-	122625141	122699109	CBFA2/RUNX1 translocation partner 3 [Source:MGI Symbol;Acc:MGI:1338013]	protein_coding	0.406069	0.423708	0.429159
ENSMUSG00000006369	Fbln1	15	+	85205949	85286535	fibulin 1 [Source:MGI Symbol;Acc:MGI:95487]	protein_coding	1.3184	1.38245	1.41183
ENSMUSG00000006373	Pgrmc1	X	+	36598206	36606079	progesterone receptor membrane component 1 [Source:MGI Symbol;Acc:MGI:1858305]	protein_coding	10.9457	11.7771	12.4925
ENSMUSG00000006378	Gcat	15	+	79030874	79038353	glycine C-acetyltransferase (2-amino-3-ketobutyrate-coenzyme A ligase) [Source:MGI Symbol;Acc:MGI:1349389]	protein_coding	1.28508	0.84407	0.66205
ENSMUSG00000006386	Tek	4	+	94739289	94874976	TEK receptor tyrosine kinase [Source:MGI Symbol;Acc:MGI:98664]	protein_coding	0.0766549	0.07521	0.0726215
ENSMUSG00000006389	Mpl	4	-	118442415	118457513	myeloproliferative leukemia virus oncogene [Source:MGI Symbol;Acc:MGI:97076]	protein_coding	0.0280906	0.155177	0.22079
ENSMUSG00000006390	Elovl1	4	+	118428093	118432953	elongation of very long chain fatty acids (FEN1/Elo2, SUR4/Elo3, yeast)-like 1 [Source:MGI Symbol;Acc:MGI:1858959]	protein_coding	10.1874	9.08853	8.67379
ENSMUSG00000006392	Med8	4	+	118409337	118415782	mediator complex subunit 8 [Source:MGI Symbol;Acc:MGI:1915269]	protein_coding	42.7748	45.3375	46.2269
ENSMUSG00000006395	Hyi	4	+	118359990	118362744	hydroxypyruvate isomerase (putative) [Source:MGI Symbol;Acc:MGI:1915430]	polymorphic_pseudogene	3.68728	3.65464	3.62341
ENSMUSG00000006398	Cdc20	4	-	118432901	118437352	cell division cycle 20 [Source:MGI Symbol;Acc:MGI:1859866]	protein_coding	7.61143	8.09236	8.32383
ENSMUSG00000006403	Adamts4	1	+	171250421	171260637	a disintegrin-like and metallopeptidase (reprolysin type) with thrombospondin type 1 motif, 4 [Source:MGI Symbol;Acc:MGI:1339949]	protein_coding	0.154222	0.0609296	0.0687965
ENSMUSG00000006411	Nectin4	1	+	171370099	171388598	nectin cell adhesion molecule 4 [Source:MGI Symbol;Acc:MGI:1918990]	protein_coding	0.0300745	0.010689	0.00251658
ENSMUSG00000006412	Pfdn2	1	+	171345670	171359254	prefoldin 2 [Source:MGI Symbol;Acc:MGI:1276111]	protein_coding	37.7204	41.9564	43.8078
ENSMUSG00000006418	Rnf114	2	+	167492645	167516173	ring finger protein 114 [Source:MGI Symbol;Acc:MGI:1933159]	protein_coding	4.13327	4.23541	4.29194
ENSMUSG00000006423	C330007P06Rik	X	-	36823737	36874111	RIKEN cDNA C330007P06 gene [Source:MGI Symbol;Acc:MGI:1924894]	protein_coding	1.62185	1.5761	1.64881
ENSMUSG00000006435	Neurl1a	19	+	47178820	47259441	neuralized E3 ubiquitin protein ligase 1A [Source:MGI Symbol;Acc:MGI:1334263]	protein_coding	0.212835	0.188699	0.169537
ENSMUSG00000006442	Srm	4	+	148591503	148594993	spermidine synthase [Source:MGI Symbol;Acc:MGI:102690]	protein_coding	2.84648	2.89406	2.89751
ENSMUSG00000006445	Epha2	4	+	141301240	141329384	Eph receptor A2 [Source:MGI Symbol;Acc:MGI:95278]	protein_coding	0.426638	0.392902	0.379475
ENSMUSG00000006456	Rbm14	19	-	4800569	4811634	RNA binding motif protein 14 [Source:MGI Symbol;Acc:MGI:1929092]	protein_coding	5.23867	5.17876	5.16589
ENSMUSG00000006457	Actn3	19	-	4861216	4877909	actinin alpha 3 [Source:MGI Symbol;Acc:MGI:99678]	protein_coding	1.61763	1.50532	1.45315
ENSMUSG00000006462	A530013C23Rik	2	+	167691177	167729172	RIKEN cDNA A530013C23 gene [Source:MGI Symbol;Acc:MGI:3041178]	lincRNA	0.120347	0.117269	0.112739
ENSMUSG00000006463	Zdhhc24	19	+	4878668	4885397	zinc finger, DHHC domain containing 24 [Source:MGI Symbol;Acc:MGI:1917855]	protein_coding	0.633922	0.599838	0.572739
ENSMUSG00000006464	Bbs1	19	-	4886878	4906628	Bardet-Biedl syndrome 1 (human) [Source:MGI Symbol;Acc:MGI:1277215]	protein_coding	0.103084	0.0691283	0.049981
ENSMUSG00000006469	Slc34a3	2	-	25228898	25234364	solute carrier family 34 (sodium phosphate), member 3 [Source:MGI Symbol;Acc:MGI:2159410]	protein_coding	0.0808178	0.0682089	0.052199
ENSMUSG00000006471	Ndor1	2	-	25244821	25256022	NADPH dependent diflavin oxidoreductase 1 [Source:MGI Symbol;Acc:MGI:1926047]	protein_coding	0.116845	0.143771	0.148402
ENSMUSG00000006476	Nsmf	2	+	25054355	25062881	NMDA receptor synaptonuclear signaling and neuronal migration factor [Source:MGI Symbol;Acc:MGI:1861755]	protein_coding	3.64272	3.81246	3.79732
ENSMUSG00000006488	Prl7a1	13	-	27633366	27642493	prolactin family 7, subfamily a, member 1 [Source:MGI Symbol;Acc:MGI:1206572]	protein_coding	0.148211	0.100038	0.0940569
ENSMUSG00000006490	Prl8a9	13	-	27557995	27564606	prolactin family8, subfamily a, member 9 [Source:MGI Symbol;Acc:MGI:1914560]	protein_coding	-0.0131674	0.00464258	0.00866026
ENSMUSG00000006494	Pdk1	2	+	71873224	71903858	pyruvate dehydrogenase kinase, isoenzyme 1 [Source:MGI Symbol;Acc:MGI:1926119]	protein_coding	0.21091	0.238655	0.268468
ENSMUSG00000006498	Ptbp1	10	+	79854427	79864771	polypyrimidine tract binding protein 1 [Source:MGI Symbol;Acc:MGI:97791]	protein_coding	9.34079	8.8854	8.62915
ENSMUSG00000006517	Mvd	8	-	122433601	122443422	mevalonate (diphospho) decarboxylase [Source:MGI Symbol;Acc:MGI:2179327]	protein_coding	1.48857	1.43521	1.40002
ENSMUSG00000006519	Cyba	8	-	122424776	122432930	cytochrome b-245, alpha polypeptide [Source:MGI Symbol;Acc:MGI:1316658]	protein_coding	809.255	739.293	703.846
ENSMUSG00000006522	Itih3	14	-	30908572	30923760	inter-alpha trypsin inhibitor, heavy chain 3 [Source:MGI Symbol;Acc:MGI:96620]	protein_coding	0.310842	0.276154	0.272624
ENSMUSG00000006526	Stimate	14	+	30825590	30877210	STIM activating enhancer [Source:MGI Symbol;Acc:MGI:1921500]	protein_coding	0.105493	0.184902	0.197053
ENSMUSG00000006527	Sfmbt1	14	+	30714849	30822721	Scm-like with four mbt domains 1 [Source:MGI Symbol;Acc:MGI:1859609]	protein_coding	0.381171	0.369144	0.379456
ENSMUSG00000006529	Itih1	14	-	30929180	30943289	inter-alpha trypsin inhibitor, heavy chain 1 [Source:MGI Symbol;Acc:MGI:96618]	protein_coding	0.136533	0.110582	0.0936002
ENSMUSG00000006538	Ihh	1	-	74945315	74951672	Indian hedgehog [Source:MGI Symbol;Acc:MGI:96533]	protein_coding	-0.00185745	0.0019497	-8.86248e-05
ENSMUSG00000006542	Prkag3	1	-	74738922	74749221	protein kinase, AMP-activated, gamma 3 non-catalytic subunit [Source:MGI Symbol;Acc:MGI:1891343]	protein_coding	0.0849853	0.0763807	0.0671184
ENSMUSG00000006546	Cryba2	1	-	74889934	74893143	crystallin, beta A2 [Source:MGI Symbol;Acc:MGI:104336]	protein_coding	0.0840947	0.0181139	-0.0188586
ENSMUSG00000006567	Atp7b	8	-	21992785	22060305	ATPase, Cu++ transporting, beta polypeptide [Source:MGI Symbol;Acc:MGI:103297]	protein_coding	0.0398561	0.0891851	0.110638
ENSMUSG00000006570	Defb2	8	+	21839926	21843482	defensin beta 2 [Source:MGI Symbol;Acc:MGI:1338754]	protein_coding	0.0262118	0.180017	0.230156
ENSMUSG00000006574	Slc4a1	11	-	102348824	102366203	solute carrier family 4 (anion exchanger), member 1 [Source:MGI Symbol;Acc:MGI:109393]	protein_coding	3.78832	3.94368	4.01408
ENSMUSG00000006575	Rundc3a	11	+	102393403	102402555	RUN domain containing 3A [Source:MGI Symbol;Acc:MGI:1858752]	protein_coding	0.636038	0.520913	0.451243
ENSMUSG00000006576	Slc4a3	1	+	75546266	75562172	solute carrier family 4 (anion exchanger), member 3 [Source:MGI Symbol;Acc:MGI:109350]	protein_coding	0.156761	0.155684	0.142553
ENSMUSG00000006585	Cdt1	8	+	122568015	122573554	chromatin licensing and DNA replication factor 1 [Source:MGI Symbol;Acc:MGI:1914427]	protein_coding	11.7351	12.8749	13.4305
ENSMUSG00000006586	Runx1t1	4	+	13743436	13893649	RUNX1 translocation partner 1 [Source:MGI Symbol;Acc:MGI:104793]	protein_coding	0.294211	0.24234	0.232993
ENSMUSG00000006587	Snai3	8	-	122454208	122460733	snail family zinc finger 3 [Source:MGI Symbol;Acc:MGI:1353563]	protein_coding	0.0354548	0.0346807	0.0403428
ENSMUSG00000006589	Aprt	8	-	122574635	122576909	adenine phosphoribosyl transferase [Source:MGI Symbol;Acc:MGI:88061]	protein_coding	374.536	401.808	411.2
ENSMUSG00000006599	Gtf2h1	7	+	46796103	46823800	general transcription factor II H, polypeptide 1 [Source:MGI Symbol;Acc:MGI:1277216]	protein_coding	6.88897	7.13391	7.31889
ENSMUSG00000006611	Hfe	13	-	23702034	23710854	homeostatic iron regulator [Source:MGI Symbol;Acc:MGI:109191]	protein_coding	0.119995	0.152296	0.171813
ENSMUSG00000006638	Abhd1	5	+	30950066	30955091	abhydrolase domain containing 1 [Source:MGI Symbol;Acc:MGI:1931013]	polymorphic_pseudogene	0.372755	0.441157	0.42407
ENSMUSG00000006641	Slc5a6	5	-	31036036	31048924	solute carrier family 5 (sodium-dependent vitamin transporter), member 6 [Source:MGI Symbol;Acc:MGI:2660847]	protein_coding	1.58852	1.657	1.68606
ENSMUSG00000006642	Tcf23	5	+	30968662	30977018	transcription factor 23 [Source:MGI Symbol;Acc:MGI:1934960]	protein_coding	0.0471854	0.0629423	0.0690312
ENSMUSG00000006649	Nphs1	7	+	30458315	30487223	nephrosis 1, nephrin [Source:MGI Symbol;Acc:MGI:1859637]	protein_coding	0.0455953	0.0430584	0.0373219
ENSMUSG00000006651	Aplp1	7	-	30434982	30445535	amyloid beta (A4) precursor-like protein 1 [Source:MGI Symbol;Acc:MGI:88046]	protein_coding	2.60093	2.59263	2.569
ENSMUSG00000006673	Qrich1	9	+	108516806	108560163	glutamine-rich 1 [Source:MGI Symbol;Acc:MGI:1916482]	protein_coding	20.1584	20.8325	20.8922
ENSMUSG00000006675	P4htm	9	-	108578862	108597667	prolyl 4-hydroxylase, transmembrane (endoplasmic reticulum) [Source:MGI Symbol;Acc:MGI:1921693]	protein_coding	0.370464	0.266859	0.238284
ENSMUSG00000006676	Usp19	9	+	108490602	108502337	ubiquitin specific peptidase 19 [Source:MGI Symbol;Acc:MGI:1918722]	protein_coding	8.60531	9.17141	9.13751
ENSMUSG00000006678	Pola1	X	-	93304767	93632155	polymerase (DNA directed), alpha 1 [Source:MGI Symbol;Acc:MGI:99660]	protein_coding	1.84558	1.71948	1.66235
ENSMUSG00000006699	Cdc42	4	-	137319696	137357720	cell division cycle 42 [Source:MGI Symbol;Acc:MGI:106211]	protein_coding	120.726	139.738	151.257
ENSMUSG00000006705	Pknox1	17	+	31564734	31607693	Pbx/knotted 1 homeobox [Source:MGI Symbol;Acc:MGI:1201409]	protein_coding	0.582551	0.615739	0.657317
ENSMUSG00000006711	D130043K22Rik	13	+	24845135	24901270	RIKEN cDNA D130043K22 gene [Source:MGI Symbol;Acc:MGI:3036268]	protein_coding	0.179186	0.127536	0.116665
ENSMUSG00000006715	Gmnn	13	-	24751845	24761923	geminin [Source:MGI Symbol;Acc:MGI:1927344]	protein_coding	57.2053	65.4224	68.1332
ENSMUSG00000006717	Acot13	13	-	24817948	24831540	acyl-CoA thioesterase 13 [Source:MGI Symbol;Acc:MGI:1914084]	protein_coding	2.80539	2.81473	2.83705
ENSMUSG00000006720	Zfp184	13	+	21945094	21960779	zinc finger protein 184 (Kruppel-like) [Source:MGI Symbol;Acc:MGI:1922244]	protein_coding	0.11264	0.0242749	0.0311632
ENSMUSG00000006724	Cyp27b1	10	+	127048250	127053006	cytochrome P450, family 27, subfamily b, polypeptide 1 [Source:MGI Symbol;Acc:MGI:1098274]	protein_coding	0.0251116	0.0439993	0.0512749
ENSMUSG00000006728	Cdk4	10	+	127063534	127067920	cyclin-dependent kinase 4 [Source:MGI Symbol;Acc:MGI:88357]	protein_coding	7.94344	9.2239	9.90912
ENSMUSG00000006731	B4galnt1	10	+	127165225	127172330	beta-1,4-N-acetyl-galactosaminyl transferase 1 [Source:MGI Symbol;Acc:MGI:1342057]	protein_coding	95.3441	112.948	119.476
ENSMUSG00000006732	Mettl1	10	+	127041414	127046365	methyltransferase like 1 [Source:MGI Symbol;Acc:MGI:1339986]	protein_coding	3.11218	2.5665	2.39504
ENSMUSG00000006736	Tspan31	10	-	127067280	127070264	tetraspanin 31 [Source:MGI Symbol;Acc:MGI:1914375]	protein_coding	3.04563	3.22545	3.55897
ENSMUSG00000006740	Kif5b	18	-	6201002	6242174	kinesin family member 5B [Source:MGI Symbol;Acc:MGI:1098268]	protein_coding	20.4399	21.1493	21.7027
ENSMUSG00000006763	Saal1	7	-	46686108	46710680	serum amyloid A-like 1 [Source:MGI Symbol;Acc:MGI:1926185]	protein_coding	0.0562776	0.0324557	0.0253734
ENSMUSG00000006764	Tph2	10	-	115078641	115185022	tryptophan hydroxylase 2 [Source:MGI Symbol;Acc:MGI:2651811]	protein_coding	0.0676754	0.0700795	0.0660159
ENSMUSG00000006777	Krt23	11	-	99477974	99493137	keratin 23 [Source:MGI Symbol;Acc:MGI:2148866]	protein_coding	0.186953	0.171152	0.15712
ENSMUSG00000006782	Cnp	11	+	100574904	100591729	2',3'-cyclic nucleotide 3' phosphodiesterase [Source:MGI Symbol;Acc:MGI:88437]	protein_coding	3.00313	2.22255	1.87051
ENSMUSG00000006784	Ttc25	11	+	100545607	100572568	tetratricopeptide repeat domain 25 [Source:MGI Symbol;Acc:MGI:1921657]	protein_coding	0.553891	0.535801	0.514112
ENSMUSG00000006800	Sulf2	2	-	166073089	166155663	sulfatase 2 [Source:MGI Symbol;Acc:MGI:1919293]	protein_coding	3.58335	3.47112	3.46684
ENSMUSG00000006818	Sod2	17	+	13006846	13040063	superoxide dismutase 2, mitochondrial [Source:MGI Symbol;Acc:MGI:98352]	protein_coding	17.381	17.7973	17.8442
ENSMUSG00000006850	Tmco6	18	+	36735039	36742397	transmembrane and coiled-coil domains 6 [Source:MGI Symbol;Acc:MGI:1919233]	protein_coding	5.77494	5.94664	6.07431
ENSMUSG00000006906	Stambp	6	-	83543211	83572729	STAM binding protein [Source:MGI Symbol;Acc:MGI:1917777]	protein_coding	1.26524	1.2301	1.21589
ENSMUSG00000006920	Ezh1	11	-	101191115	101226463	enhancer of zeste 1 polycomb repressive complex 2 subunit [Source:MGI Symbol;Acc:MGI:1097695]	protein_coding	1.51124	1.46171	1.39968
ENSMUSG00000006930	Hap1	11	-	100347327	100356128	huntingtin-associated protein 1 [Source:MGI Symbol;Acc:MGI:1261831]	protein_coding	0.314439	0.285173	0.264521
ENSMUSG00000006931	P3h4	11	-	100408456	100414836	prolyl 3-hydroxylase family member 4 (non-enzymatic) [Source:MGI Symbol;Acc:MGI:1913430]	protein_coding	0.044714	0.0577319	0.0608589
ENSMUSG00000006932	Ctnnb1	9	+	120929216	120960507	catenin (cadherin associated protein), beta 1 [Source:MGI Symbol;Acc:MGI:88276]	protein_coding	51.5712	54.25	54.5058
ENSMUSG00000006941	Eif1b	9	+	120492232	120495330	eukaryotic translation initiation factor 1B [Source:MGI Symbol;Acc:MGI:1916219]	protein_coding	3.87118	4.19077	4.25643
ENSMUSG00000006948	Klk4	7	+	43881160	43885804	kallikrein related-peptidase 4 (prostase, enamel matrix, prostate) [Source:MGI Symbol;Acc:MGI:1861379]	protein_coding	-0.0202816	0.01143	0.00916669
ENSMUSG00000006958	Chrd	16	+	20733127	20742384	chordin [Source:MGI Symbol;Acc:MGI:1313268]	protein_coding	0.0568666	0.0570704	0.0558145
ENSMUSG00000006998	Psmd2	16	+	20651652	20663414	proteasome (prosome, macropain) 26S subunit, non-ATPase, 2 [Source:MGI Symbol;Acc:MGI:1096584]	protein_coding	19.9154	18.3126	17.2343
ENSMUSG00000007021	Syngr3	17	-	24685092	24689955	synaptogyrin 3 [Source:MGI Symbol;Acc:MGI:1341881]	protein_coding	0.293299	0.235493	0.205276
ENSMUSG00000007029	Vars	17	+	35000987	35016322	valyl-tRNA synthetase [Source:MGI Symbol;Acc:MGI:90675]	protein_coding	0.367029	0.390799	0.396629
ENSMUSG00000007030	Vwa7	17	+	35016579	35026741	von Willebrand factor A domain containing 7 [Source:MGI Symbol;Acc:MGI:1306798]	protein_coding	0.139297	0.139795	0.137652
ENSMUSG00000007033	Hspa1l	17	+	34972703	34979285	heat shock protein 1-like [Source:MGI Symbol;Acc:MGI:96231]	protein_coding	0.125011	0.143651	0.152149
ENSMUSG00000007034	Slc44a4	17	+	34914466	34930436	solute carrier family 44, member 4 [Source:MGI Symbol;Acc:MGI:1917379]	protein_coding	1.39431	1.42319	1.42535
ENSMUSG00000007035	Msh5	17	-	35028605	35046745	mutS homolog 5 [Source:MGI Symbol;Acc:MGI:1329021]	protein_coding	0.10736	0.0775599	0.0670158
ENSMUSG00000007036	Abhd16a	17	+	35089263	35102987	abhydrolase domain containing 16A [Source:MGI Symbol;Acc:MGI:99476]	protein_coding	6.07894	5.77704	5.58806
ENSMUSG00000007038	Neu1	17	+	34931253	34935953	neuraminidase 1 [Source:MGI Symbol;Acc:MGI:97305]	protein_coding	30.2831	28.7005	27.7457
ENSMUSG00000007039	Ddah2	17	+	35059035	35062095	dimethylarginine dimethylaminohydrolase 2 [Source:MGI Symbol;Acc:MGI:1859016]	protein_coding	0.0690604	0.107787	0.108474
ENSMUSG00000007041	Clic1	17	+	35049966	35058749	chloride intracellular channel 1 [Source:MGI Symbol;Acc:MGI:2148924]	protein_coding	204.869	220.398	227.083
ENSMUSG00000007050	Lsm2	17	+	34981862	34985891	LSM2 homolog, U6 small nuclear RNA and mRNA degradation associated [Source:MGI Symbol;Acc:MGI:90676]	protein_coding	3.20513	3.02977	2.99317
ENSMUSG00000007080	Pole	5	+	110286306	110337474	polymerase (DNA directed), epsilon [Source:MGI Symbol;Acc:MGI:1196391]	protein_coding	2.0727	1.97139	1.89802
ENSMUSG00000007097	Atp1a2	1	-	172271709	172298064	ATPase, Na+/K+ transporting, alpha 2 polypeptide [Source:MGI Symbol;Acc:MGI:88106]	protein_coding	0.730309	0.669831	0.635062
ENSMUSG00000007107	Atp1a4	1	-	172223513	172258414	ATPase, Na+/K+ transporting, alpha 4 polypeptide [Source:MGI Symbol;Acc:MGI:1351335]	protein_coding	0.0225957	0.0137604	0.0145987
ENSMUSG00000007122	Casq1	1	-	172209894	172219868	calsequestrin 1 [Source:MGI Symbol;Acc:MGI:1309468]	protein_coding	0.808711	0.792756	0.784932
ENSMUSG00000007207	Stx1a	5	+	135023482	135051100	syntaxin 1A (brain) [Source:MGI Symbol;Acc:MGI:109355]	protein_coding	0.148793	0.107028	0.0875418
ENSMUSG00000007209	Ceacam9	7	+	16721929	16726132	carcinoembryonic antigen-related cell adhesion molecule 9 [Source:MGI Symbol;Acc:MGI:1347247]	protein_coding	0.100478	0.101635	0.0988666
ENSMUSG00000007216	Zfp775	6	+	48602063	48623227	zinc finger protein 775 [Source:MGI Symbol;Acc:MGI:2683557]	protein_coding	0.0541041	0.0706986	0.0585504
ENSMUSG00000007279	Scube2	7	-	109798676	109865679	signal peptide, CUB domain, EGF-like 2 [Source:MGI Symbol;Acc:MGI:1928765]	protein_coding	0.0376448	0.0331152	0.0287007
ENSMUSG00000007338	Mrpl49	19	-	6053622	6057785	mitochondrial ribosomal protein L49 [Source:MGI Symbol;Acc:MGI:108180]	protein_coding	3.62816	3.46458	3.50729
ENSMUSG00000007379	Dennd2c	3	+	103102604	103169769	DENN/MADD domain containing 2C [Source:MGI Symbol;Acc:MGI:3036254]	protein_coding	0.164805	0.12651	0.126899
ENSMUSG00000007411	Mark3	12	+	111574523	111656221	MAP/microtubule affinity regulating kinase 3 [Source:MGI Symbol;Acc:MGI:1341865]	protein_coding	11.7174	12.4176	12.7264
ENSMUSG00000007415	Gatad1	5	-	3632932	3657185	GATA zinc finger domain containing 1 [Source:MGI Symbol;Acc:MGI:1914460]	protein_coding	12.0414	11.3702	11.0455
ENSMUSG00000007440	Pcdha11	18	+	37005203	37187657	protocadherin alpha 11 [Source:MGI Symbol;Acc:MGI:1298372]	protein_coding	0.025395	0.0236478	0.0229132
ENSMUSG00000007457	2310003L06Rik	5	+	87969459	87972870	RIKEN cDNA 2310003L06 gene [Source:MGI Symbol;Acc:MGI:1921498]	protein_coding	0.0856798	0.0597082	0.0734443
ENSMUSG00000007458	M6pr	6	+	122308720	122317680	mannose-6-phosphate receptor, cation dependent [Source:MGI Symbol;Acc:MGI:96904]	protein_coding	8.82335	8.50126	8.40161
ENSMUSG00000007476	Lrrc8a	2	+	30237715	30263790	leucine rich repeat containing 8A VRAC subunit A [Source:MGI Symbol;Acc:MGI:2652847]	protein_coding	18.5946	18.6074	18.4574
ENSMUSG00000007480	Mc5r	18	+	68337596	68342446	melanocortin 5 receptor [Source:MGI Symbol;Acc:MGI:99420]	protein_coding	0.0298362	0.0385402	0.0485333
ENSMUSG00000007564	Ppp2r1a	17	+	20945311	20965916	protein phosphatase 2, regulatory subunit A, alpha [Source:MGI Symbol;Acc:MGI:1926334]	protein_coding	9.14876	8.65466	8.31608
ENSMUSG00000007570	Fance	17	+	28313519	28326572	Fanconi anemia, complementation group E [Source:MGI Symbol;Acc:MGI:1920025]	protein_coding	1.15856	1.14292	1.11434
ENSMUSG00000007589	Tinf2	14	-	55674689	55681820	Terf1 (TRF1)-interacting nuclear factor 2 [Source:MGI Symbol;Acc:MGI:107246]	protein_coding	1.61797	1.83453	1.8757
ENSMUSG00000007591	Tssk4	14	+	55650184	55652539	testis-specific serine kinase 4 [Source:MGI Symbol;Acc:MGI:1918349]	protein_coding	-0.0229424	0.00523361	0.0181525
ENSMUSG00000007594	Hapln4	8	+	70083457	70090862	hyaluronan and proteoglycan link protein 4 [Source:MGI Symbol;Acc:MGI:2679531]	protein_coding	0.109663	0.0899529	0.0672608
ENSMUSG00000007603	Dus3l	17	+	56764757	56770093	dihydrouridine synthase 3-like (S. cerevisiae) [Source:MGI Symbol;Acc:MGI:2147092]	protein_coding	0.289888	0.255528	0.237271
ENSMUSG00000007610	Gtpbp3	8	+	71488103	71499583	GTP binding protein 3 [Source:MGI Symbol;Acc:MGI:1917609]	protein_coding	1.18754	1.16362	1.15031
ENSMUSG00000007613	Tgfbr1	4	+	47353222	47414931	transforming growth factor, beta receptor I [Source:MGI Symbol;Acc:MGI:98728]	protein_coding	0.995471	1.05723	1.08028
ENSMUSG00000007617	Homer1	13	+	93299635	93405129	homer scaffolding protein 1 [Source:MGI Symbol;Acc:MGI:1347345]	protein_coding	0.3564	0.362381	0.376845
ENSMUSG00000007646	Rad51c	11	-	87376645	87404954	RAD51 paralog C [Source:MGI Symbol;Acc:MGI:2150020]	protein_coding	2.4881	2.48267	2.56586
ENSMUSG00000007653	Gabrb2	11	+	42419757	42629028	gamma-aminobutyric acid (GABA) A receptor, subunit beta 2 [Source:MGI Symbol;Acc:MGI:95620]	protein_coding	0.144166	0.161903	0.175127
ENSMUSG00000007655	Cav1	6	+	17306335	17341452	caveolin 1, caveolae protein [Source:MGI Symbol;Acc:MGI:102709]	protein_coding	1.10018	1.04382	1.02166
ENSMUSG00000007656	Arpp19	9	+	75037614	75060313	cAMP-regulated phosphoprotein 19 [Source:MGI Symbol;Acc:MGI:1891691]	protein_coding	81.1115	81.9175	81.6507
ENSMUSG00000007659	Bcl2l1	2	-	152780668	152831728	BCL2-like 1 [Source:MGI Symbol;Acc:MGI:88139]	protein_coding	55.3775	52.9998	51.0576
ENSMUSG00000007670	Khsrp	17	-	57021051	57031522	KH-type splicing regulatory protein [Source:MGI Symbol;Acc:MGI:1336214]	protein_coding	12.7339	12.2692	12.0081
ENSMUSG00000007682	Dio2	12	-	90724552	90738438	deiodinase, iodothyronine, type II [Source:MGI Symbol;Acc:MGI:1338833]	protein_coding	0.550311	0.558147	0.552305
ENSMUSG00000007721	Ccdc124	8	-	70868227	70873935	coiled-coil domain containing 124 [Source:MGI Symbol;Acc:MGI:1916403]	protein_coding	17.8406	17.8819	17.8683
ENSMUSG00000007739	Cct4	11	+	22990519	23003780	chaperonin containing Tcp1, subunit 4 (delta) [Source:MGI Symbol;Acc:MGI:104689]	protein_coding	15.6035	14.583	14.0918
ENSMUSG00000007777	0610009B22Rik	11	-	51685386	51688874	RIKEN cDNA 0610009B22 gene [Source:MGI Symbol;Acc:MGI:1913300]	protein_coding	106.261	88.36	82.1918
ENSMUSG00000007783	Cpt1c	7	-	44959372	44974851	carnitine palmitoyltransferase 1c [Source:MGI Symbol;Acc:MGI:2446526]	protein_coding	0.169663	0.150169	0.137358
ENSMUSG00000007805	Twist2	1	+	91801461	91848028	twist basic helix-loop-helix transcription factor 2 [Source:MGI Symbol;Acc:MGI:104685]	protein_coding	0.114848	0.0889995	0.10232
ENSMUSG00000007812	Zfp655	5	+	145231715	145247302	zinc finger protein 655 [Source:MGI Symbol;Acc:MGI:1919861]	protein_coding	1.93986	1.97533	1.93618
ENSMUSG00000007815	Rhoa	9	+	108306129	108337934	ras homolog family member A [Source:MGI Symbol;Acc:MGI:1096342]	protein_coding	68.5267	60.164	56.4355
ENSMUSG00000007817	Zmiz1	14	+	25459185	25666743	zinc finger, MIZ-type containing 1 [Source:MGI Symbol;Acc:MGI:3040693]	protein_coding	4.84467	4.18244	3.88413
ENSMUSG00000007827	Ankrd26	6	-	118501308	118562226	ankyrin repeat domain 26 [Source:MGI Symbol;Acc:MGI:1917887]	protein_coding	4.91933	5.02578	5.0779
ENSMUSG00000007833	Aldh16a1	7	-	45140684	45154584	aldehyde dehydrogenase 16 family, member A1 [Source:MGI Symbol;Acc:MGI:1916998]	protein_coding	3.99377	4.03798	4.07521
ENSMUSG00000007836	Hnrnpa0	13	-	58125879	58128556	heterogeneous nuclear ribonucleoprotein A0 [Source:MGI Symbol;Acc:MGI:1924384]	protein_coding	12.5416	13.2827	13.693
ENSMUSG00000007837	Prrg2	7	-	45053584	45062677	proline-rich Gla (G-carboxyglutamic acid) polypeptide 2 [Source:MGI Symbol;Acc:MGI:1929596]	protein_coding	1.62636	1.69836	1.65898
ENSMUSG00000007850	Hnrnph1	11	+	50376990	50386528	heterogeneous nuclear ribonucleoprotein H1 [Source:MGI Symbol;Acc:MGI:1891925]	protein_coding	98.8721	102.003	103.176
ENSMUSG00000007867	Ift43	12	+	86082541	86162459	intraflagellar transport 43 [Source:MGI Symbol;Acc:MGI:1923661]	protein_coding	7.93436	7.48893	7.53793
ENSMUSG00000007872	Id3	4	+	136143497	136145755	inhibitor of DNA binding 3 [Source:MGI Symbol;Acc:MGI:96398]	protein_coding	1.73456	1.83013	1.88292
ENSMUSG00000007877	Tcap	11	+	98383811	98384953	titin-cap [Source:MGI Symbol;Acc:MGI:1330233]	protein_coding	1.39393	1.30923	1.26023
ENSMUSG00000007880	Arid1a	4	-	133679008	133756769	AT rich interactive domain 1A (SWI-like) [Source:MGI Symbol;Acc:MGI:1935147]	protein_coding	21.624	22.2147	22.6125
ENSMUSG00000007888	Crlf1	8	+	70493158	70504081	cytokine receptor-like factor 1 [Source:MGI Symbol;Acc:MGI:1340030]	protein_coding	0.0279403	0.0576201	0.0715386
ENSMUSG00000007891	Ctsd	7	-	142375911	142388038	cathepsin D [Source:MGI Symbol;Acc:MGI:88562]	protein_coding	214.869	197.647	187.624
ENSMUSG00000007892	Rplp1	9	-	61913284	61914542	ribosomal protein, large, P1 [Source:MGI Symbol;Acc:MGI:1927099]	protein_coding	1068.87	1059.34	1050.45
ENSMUSG00000007907	Cabs1	5	+	87979439	87981544	calcium binding protein, spermatid specific 1 [Source:MGI Symbol;Acc:MGI:1918227]	protein_coding	0.0103458	0.0104595	0.00969569
ENSMUSG00000007908	Hmgcll1	9	+	76014855	76136350	3-hydroxymethyl-3-methylglutaryl-Coenzyme A lyase-like 1 [Source:MGI Symbol;Acc:MGI:2446108]	protein_coding	0.0586086	0.0947348	0.0784452
ENSMUSG00000007944	Ttc9b	7	+	27653915	27657346	tetratricopeptide repeat domain 9B [Source:MGI Symbol;Acc:MGI:1920282]	protein_coding	0.0499474	0.0669836	0.0752674
ENSMUSG00000007946	Phox2a	7	+	101818313	101822726	paired-like homeobox 2a [Source:MGI Symbol;Acc:MGI:106633]	protein_coding	0.120627	0.0985099	0.0853116
ENSMUSG00000007950	Abhd8	8	-	71456705	71463655	abhydrolase domain containing 8 [Source:MGI Symbol;Acc:MGI:1918946]	protein_coding	0.227794	0.290026	0.308843
ENSMUSG00000007987	Ift22	5	+	136908150	136915404	intraflagellar transport 22 [Source:MGI Symbol;Acc:MGI:1914536]	protein_coding	0.285343	0.323385	0.333307
ENSMUSG00000007989	Fzd3	14	-	65192449	65262463	frizzled class receptor 3 [Source:MGI Symbol;Acc:MGI:108476]	protein_coding	0.721434	0.626691	0.62187
ENSMUSG00000008028	1700008O03Rik	7	-	44360043	44385820	RIKEN cDNA 1700008O03 gene [Source:MGI Symbol;Acc:MGI:1916599]	protein_coding	0.0870021	0.0757529	0.088001
ENSMUSG00000008035	Mid1ip1	X	+	10715013	10719690	Mid1 interacting protein 1 (gastrulation specific G12-like (zebrafish)) [Source:MGI Symbol;Acc:MGI:1915291]	protein_coding	21.5424	22.1442	22.7089
ENSMUSG00000008036	Ap2s1	7	+	16738410	16749294	adaptor-related protein complex 2, sigma 1 subunit [Source:MGI Symbol;Acc:MGI:2141861]	protein_coding	46.0909	42.1752	40.69
ENSMUSG00000008090	Fgfrl1	5	+	108692382	108706924	fibroblast growth factor receptor-like 1 [Source:MGI Symbol;Acc:MGI:2150920]	protein_coding	0.155606	0.178424	0.185741
ENSMUSG00000008129	4930432K21Rik	8	+	84148025	84172590	RIKEN cDNA 4930432K21 gene [Source:MGI Symbol;Acc:MGI:1921916]	protein_coding	0.0248585	0.0505277	0.0663673
ENSMUSG00000008136	Fhl2	1	-	43123074	43196984	four and a half LIM domains 2 [Source:MGI Symbol;Acc:MGI:1338762]	protein_coding	0.757514	0.510277	0.39621
ENSMUSG00000008140	Emc10	7	-	44489937	44496529	ER membrane protein complex subunit 10 [Source:MGI Symbol;Acc:MGI:1916933]	protein_coding	8.56231	8.43634	8.33696
ENSMUSG00000008153	Clstn3	6	-	124430581	124464794	calsyntenin 3 [Source:MGI Symbol;Acc:MGI:2178323]	protein_coding	1.37776	1.57886	1.62054
ENSMUSG00000008167	Fbxw9	8	+	85060055	85067124	F-box and WD-40 domain protein 9 [Source:MGI Symbol;Acc:MGI:1915878]	protein_coding	0.508006	0.467656	0.444959
ENSMUSG00000008193	Spib	7	-	44525993	44532071	Spi-B transcription factor (Spi-1/PU.1 related) [Source:MGI Symbol;Acc:MGI:892986]	protein_coding	0.0885708	0.106005	0.117683
ENSMUSG00000008200	Fnbp4	2	+	90745370	90781021	formin binding protein 4 [Source:MGI Symbol;Acc:MGI:1860513]	protein_coding	11.3913	12.5569	13.1806
ENSMUSG00000008206	Cers4	8	+	4493026	4531680	ceramide synthase 4 [Source:MGI Symbol;Acc:MGI:1914510]	protein_coding	0.231279	0.23483	0.229484
ENSMUSG00000008226	Scrn3	2	+	73312601	73337818	secernin 3 [Source:MGI Symbol;Acc:MGI:1921866]	protein_coding	0.341344	0.244153	0.21015
ENSMUSG00000008301	Phax	18	+	56562443	56587712	phosphorylated adaptor for RNA export [Source:MGI Symbol;Acc:MGI:1891839]	protein_coding	3.2112	3.15178	3.1622
ENSMUSG00000008305	Tle1	4	-	72117142	72200919	transducin-like enhancer of split 1 [Source:MGI Symbol;Acc:MGI:104636]	protein_coding	0.73518	0.705898	0.673366
ENSMUSG00000008307	1700109H08Rik	5	+	3571566	3584356	RIKEN cDNA 1700109H08 gene [Source:MGI Symbol;Acc:MGI:1924286]	protein_coding	3.47489	3.91085	3.99748
ENSMUSG00000008318	Relt	7	-	100845847	100863446	RELT tumor necrosis factor receptor [Source:MGI Symbol;Acc:MGI:2443373]	protein_coding	1.92617	2.01883	2.01563
ENSMUSG00000008333	Snrpb2	2	+	143063039	143072853	U2 small nuclear ribonucleoprotein B [Source:MGI Symbol;Acc:MGI:104805]	protein_coding	87.731	74.997	69.4021
ENSMUSG00000008348	Ubc	5	-	125385965	125390202	ubiquitin C [Source:MGI Symbol;Acc:MGI:98889]	protein_coding	34.6599	36.2102	37.2226
ENSMUSG00000008373	Prpf31	7	+	3629985	3642486	pre-mRNA processing factor 31 [Source:MGI Symbol;Acc:MGI:1916238]	protein_coding	3.35381	2.86926	2.77394
ENSMUSG00000008384	Sertad1	7	+	27486910	27490316	SERTA domain containing 1 [Source:MGI Symbol;Acc:MGI:1913438]	protein_coding	5.95662	5.53697	5.44273
ENSMUSG00000008393	Carhsp1	16	-	8658580	8672155	calcium regulated heat stable protein 1 [Source:MGI Symbol;Acc:MGI:1196368]	protein_coding	5.71205	5.89435	5.90761
ENSMUSG00000008398	Elk3	10	-	93247414	93311135	ELK3, member of ETS oncogene family [Source:MGI Symbol;Acc:MGI:101762]	protein_coding	6.18048	6.31968	6.34664
ENSMUSG00000008429	Herpud2	9	-	25108132	25151820	HERPUD family member 2 [Source:MGI Symbol;Acc:MGI:1915393]	protein_coding	15.1615	15.7917	16.1093
ENSMUSG00000008435	Rdh13	7	-	4424770	4445649	retinol dehydrogenase 13 (all-trans and 9-cis) [Source:MGI Symbol;Acc:MGI:1918732]	protein_coding	0.467341	0.397915	0.393373
ENSMUSG00000008438	Adam21	12	-	81558584	81568474	a disintegrin and metallopeptidase domain 21 [Source:MGI Symbol;Acc:MGI:1861229]	protein_coding	0.0973246	0.087864	0.081578
ENSMUSG00000008450	Nutf2	8	+	105860580	105879330	nuclear transport factor 2 [Source:MGI Symbol;Acc:MGI:1915301]	protein_coding	28.1632	34.0662	37.315
ENSMUSG00000008461	Fut1	7	+	45617289	45621059	fucosyltransferase 1 [Source:MGI Symbol;Acc:MGI:109375]	protein_coding	0.0202314	0.0165172	0.0137609
ENSMUSG00000008475	Arpc5	1	+	152766542	152775597	actin related protein 2/3 complex, subunit 5 [Source:MGI Symbol;Acc:MGI:1915021]	protein_coding	741.378	736.134	735.424
ENSMUSG00000008482	Rnf151	17	-	24715839	24718063	ring finger protein 151 [Source:MGI Symbol;Acc:MGI:1914754]	protein_coding	0.0634834	0.0686201	0.0691817
ENSMUSG00000008489	Elavl2	4	-	91250763	91400785	ELAV like RNA binding protein 1 [Source:MGI Symbol;Acc:MGI:1100887]	protein_coding	0.407928	0.380986	0.36685
ENSMUSG00000008496	Pou2f2	7	-	25087344	25179726	POU domain, class 2, transcription factor 2 [Source:MGI Symbol;Acc:MGI:101897]	protein_coding	0.512551	0.598887	0.664964
ENSMUSG00000008540	Mgst1	6	+	138140316	138156755	microsomal glutathione S-transferase 1 [Source:MGI Symbol;Acc:MGI:1913850]	protein_coding	690.113	672.411	654.216
ENSMUSG00000008575	Nfib	4	-	82290173	82705750	nuclear factor I/B [Source:MGI Symbol;Acc:MGI:103188]	protein_coding	0.237651	0.216168	0.224366
ENSMUSG00000008590	Htr3b	9	-	48935008	48964990	5-hydroxytryptamine (serotonin) receptor 3B [Source:MGI Symbol;Acc:MGI:1861899]	protein_coding	0.0631417	0.0785098	0.0861784
ENSMUSG00000008601	Rab25	3	-	88542029	88548300	RAB25, member RAS oncogene family [Source:MGI Symbol;Acc:MGI:1858203]	protein_coding	0.592457	0.645726	0.621987
ENSMUSG00000008604	Ubqln4	3	+	88553758	88569725	ubiquilin 4 [Source:MGI Symbol;Acc:MGI:2150152]	protein_coding	1.39803	1.31453	1.27577
ENSMUSG00000008658	Rbfox1	16	+	5885355	7411526	RNA binding protein, fox-1 homolog (C. elegans) 1 [Source:MGI Symbol;Acc:MGI:1926224]	protein_coding	0.286887	0.321258	0.344995
ENSMUSG00000008668	Rps18	17	-	33951999	33956001	ribosomal protein S18 [Source:MGI Symbol;Acc:MGI:98146]	protein_coding	201.476	200.247	198.132
ENSMUSG00000008682	Rpl10	X	+	74270812	74273135	ribosomal protein L10 [Source:MGI Symbol;Acc:MGI:105943]	protein_coding	261.391	266.368	266.98
ENSMUSG00000008683	Rps15a	7	-	118104372	118116188	ribosomal protein S15A [Source:MGI Symbol;Acc:MGI:2389091]	protein_coding	60.0467	59.3606	59.1802
ENSMUSG00000008690	Ncaph2	15	+	89355719	89372826	non-SMC condensin II complex, subunit H2 [Source:MGI Symbol;Acc:MGI:1289164]	protein_coding	28.9393	25.887	24.6298
ENSMUSG00000008730	Hipk1	3	-	103739815	103791563	homeodomain interacting protein kinase 1 [Source:MGI Symbol;Acc:MGI:1314873]	protein_coding	60.7968	66.3197	69.1711
ENSMUSG00000008734	Gprc5b	7	-	118972047	118995211	G protein-coupled receptor, family C, group 5, member B [Source:MGI Symbol;Acc:MGI:1927596]	protein_coding	0.269562	0.240404	0.241462
ENSMUSG00000008763	Man1a2	3	-	100562208	100685503	mannosidase, alpha, class 1A, member 2 [Source:MGI Symbol;Acc:MGI:104676]	protein_coding	1.72896	1.85019	1.90183
ENSMUSG00000008789	Ceacam5	7	+	17713238	17761132	carcinoembryonic antigen-related cell adhesion molecule 5 [Source:MGI Symbol;Acc:MGI:1920500]	protein_coding	0.00173252	0.0135245	0.0172568
ENSMUSG00000008813	Tppp2	14	+	51918425	51920700	tubulin polymerization-promoting protein family member 2 [Source:MGI Symbol;Acc:MGI:2684923]	protein_coding	-0.00905767	0.00311477	0.00600697
ENSMUSG00000008822	Acyp1	12	-	85272398	85288438	acylphosphatase 1, erythrocyte (common) type [Source:MGI Symbol;Acc:MGI:1913454]	protein_coding	1.37459	1.77534	1.92677
ENSMUSG00000008843	Cldn13	5	-	134914249	134915526	claudin 13 [Source:MGI Symbol;Acc:MGI:1913102]	protein_coding	-0.0179889	0.0392443	0.0694974
ENSMUSG00000008845	Cd163	6	+	124304656	124330527	CD163 antigen [Source:MGI Symbol;Acc:MGI:2135946]	protein_coding	0.0737028	0.0702397	0.0766135
ENSMUSG00000008855	Hdac5	11	-	102194432	102230166	histone deacetylase 5 [Source:MGI Symbol;Acc:MGI:1333784]	protein_coding	1.40823	1.33965	1.26359
ENSMUSG00000008859	Rala	13	-	17880571	17944239	v-ral simian leukemia viral oncogene A (ras related) [Source:MGI Symbol;Acc:MGI:1927243]	protein_coding	7.58969	7.35258	7.38655
ENSMUSG00000008874	Clec3a	8	+	114418086	114425846	C-type lectin domain family 3, member a [Source:MGI Symbol;Acc:MGI:2685642]	protein_coding	-0.0165775	0.00843075	0.00835573
ENSMUSG00000008892	Vdac3	8	-	22577075	22593813	voltage-dependent anion channel 3 [Source:MGI Symbol;Acc:MGI:106922]	protein_coding	14.8173	15.4223	15.6265
ENSMUSG00000008932	Slc1a7	4	+	107968332	108013532	solute carrier family 1 (glutamate transporter), member 7 [Source:MGI Symbol;Acc:MGI:2444087]	protein_coding	0.0228565	0.061441	0.0797873
ENSMUSG00000008958	Vps72	3	+	95111022	95123051	vacuolar protein sorting 72 [Source:MGI Symbol;Acc:MGI:1202305]	protein_coding	7.59671	7.76976	8.17284
ENSMUSG00000008976	Gabpa	16	+	84834925	84863779	GA repeat binding protein, alpha [Source:MGI Symbol;Acc:MGI:95610]	protein_coding	0.943567	1.00329	1.04349
ENSMUSG00000008999	Bmp7	2	-	172868012	172940321	bone morphogenetic protein 7 [Source:MGI Symbol;Acc:MGI:103302]	protein_coding	0.08552	0.0822819	0.0785702
ENSMUSG00000009013	Dynll1	5	-	115297110	115300999	dynein light chain LC8-type 1 [Source:MGI Symbol;Acc:MGI:1861457]	protein_coding	12.3497	10.6195	9.80377
ENSMUSG00000009030	Pdcl	2	-	37350074	37359332	phosducin-like [Source:MGI Symbol;Acc:MGI:1914716]	protein_coding	3.26299	3.47653	3.60612
ENSMUSG00000009035	Tmem184b	15	-	79360684	79403569	transmembrane protein 184b [Source:MGI Symbol;Acc:MGI:2445179]	protein_coding	9.71857	9.6397	9.53826
ENSMUSG00000009047	Gm5965	16	+	88777896	88778728	predicted gene 5965 [Source:MGI Symbol;Acc:MGI:3645197]	protein_coding	0.0350082	0.0654577	0.0769185
ENSMUSG00000009070	Rsph14	10	-	74957477	75032586	radial spoke head homolog 14 (Chlamydomonas) [Source:MGI Symbol;Acc:MGI:1918486]	protein_coding	0.0714237	0.0431834	0.0291213
ENSMUSG00000009073	Nf2	11	-	4765845	4849536	neurofibromin 2 [Source:MGI Symbol;Acc:MGI:97307]	protein_coding	0.239066	0.228254	0.229365
ENSMUSG00000009075	Cabp7	11	-	4736892	4746778	calcium binding protein 7 [Source:MGI Symbol;Acc:MGI:2183437]	protein_coding	0.194758	0.144449	0.111489
ENSMUSG00000009076	Zmat5	11	+	4704678	4737669	zinc finger, matrin type 5 [Source:MGI Symbol;Acc:MGI:1914428]	protein_coding	25.9726	26.2428	26.3595
ENSMUSG00000009079	Ewsr1	11	-	5069689	5099266	Ewing sarcoma breakpoint region 1 [Source:MGI Symbol;Acc:MGI:99960]	protein_coding	61.1227	63.5548	63.7045
ENSMUSG00000009090	Ap1b1	11	+	4986824	5042791	adaptor protein complex AP-1, beta 1 subunit [Source:MGI Symbol;Acc:MGI:1096368]	protein_coding	1.08693	0.979945	0.915545
ENSMUSG00000009092	Derl3	10	+	75893413	75895941	Der1-like domain family, member 3 [Source:MGI Symbol;Acc:MGI:1917627]	protein_coding	0.778131	0.771466	0.761968
ENSMUSG00000009093	Gstt4	10	-	75814943	75822543	glutathione S-transferase, theta 4 [Source:MGI Symbol;Acc:MGI:1923136]	protein_coding	-0.00639498	0.0120011	-0.00549895
ENSMUSG00000009097	Tbx1	16	-	18580979	18590671	T-box 1 [Source:MGI Symbol;Acc:MGI:98493]	protein_coding	0.0411167	0.0579419	0.0608963
ENSMUSG00000009108	Gnat2	3	+	108092789	108101432	guanine nucleotide binding protein, alpha transducing 2 [Source:MGI Symbol;Acc:MGI:95779]	protein_coding	0.186427	0.131135	0.100748
ENSMUSG00000009112	Bcl2l13	6	+	120836212	120892842	BCL2-like 13 (apoptosis facilitator) [Source:MGI Symbol;Acc:MGI:2136959]	protein_coding	2.87135	2.87814	2.87161
ENSMUSG00000009114	2610028H24Rik	10	+	76449081	76461110	RIKEN cDNA 2610028H24 gene [Source:MGI Symbol;Acc:MGI:1924214]	protein_coding	0.0240819	-0.0114177	-0.0122376
ENSMUSG00000009115	Spatc1l	10	+	76562272	76570201	spermatogenesis and centriole associated 1 like [Source:MGI Symbol;Acc:MGI:1923823]	protein_coding	-0.00788886	0.00320179	0.00473464
ENSMUSG00000009145	Dqx1	6	+	83057844	83067318	DEAQ RNA-dependent ATPase [Source:MGI Symbol;Acc:MGI:2136388]	protein_coding	0.318189	0.356371	0.366049
ENSMUSG00000009185	Ccl8	11	+	82115185	82116799	chemokine (C-C motif) ligand 8 [Source:MGI Symbol;Acc:MGI:101878]	protein_coding	-0.0882453	0.162898	0.339274
ENSMUSG00000009207	Lnpk	2	-	74520291	74579435	lunapark, ER junction formation factor [Source:MGI Symbol;Acc:MGI:1918115]	protein_coding	5.19393	4.92276	4.90412
ENSMUSG00000009210	Prr29	11	+	106365472	106377558	proline rich 29 [Source:MGI Symbol;Acc:MGI:1922823]	protein_coding	-0.0233957	0.0043224	0.0195493
ENSMUSG00000009214	Mymk	2	-	27061636	27072179	myomaker, myoblast fusion factor [Source:MGI Symbol;Acc:MGI:1913389]	protein_coding	0.0284925	0.0134579	0.00455826
ENSMUSG00000009216	Fam163b	2	-	27110380	27142491	family with sequence similarity 163, member B [Source:MGI Symbol;Acc:MGI:1926106]	protein_coding	0.172051	0.165068	0.160499
ENSMUSG00000009246	Trpm5	7	-	143069153	143094642	transient receptor potential cation channel, subfamily M, member 5 [Source:MGI Symbol;Acc:MGI:1861718]	protein_coding	0.134889	0.153753	0.158402
ENSMUSG00000009248	Ascl2	7	-	142966829	142969264	achaete-scute family bHLH transcription factor 2 [Source:MGI Symbol;Acc:MGI:96920]	protein_coding	0.0240257	0.063145	0.0680454
ENSMUSG00000009281	Rarres2	6	-	48569696	48572789	retinoic acid receptor responder (tazarotene induced) 2 [Source:MGI Symbol;Acc:MGI:1918910]	protein_coding	0.493723	0.534826	0.560727
ENSMUSG00000009291	Pttg1ip	10	+	77581720	77598732	pituitary tumor-transforming 1 interacting protein [Source:MGI Symbol;Acc:MGI:2652132]	protein_coding	15.8849	16.933	17.603
ENSMUSG00000009292	Trpm2	10	-	77907722	77970563	transient receptor potential cation channel, subfamily M, member 2 [Source:MGI Symbol;Acc:MGI:1351901]	protein_coding	2.84012	2.99933	3.02162
ENSMUSG00000009293	Ube2g2	10	+	77622275	77645993	ubiquitin-conjugating enzyme E2G 2 [Source:MGI Symbol;Acc:MGI:1343188]	protein_coding	1.95018	2.1947	2.27912
ENSMUSG00000009350	Mpo	11	+	87793581	87804413	myeloperoxidase [Source:MGI Symbol;Acc:MGI:97137]	protein_coding	26.0526	25.4922	25.3881
ENSMUSG00000009356	Lpo	11	-	87806428	87828289	lactoperoxidase [Source:MGI Symbol;Acc:MGI:1923363]	protein_coding	0.0257809	-0.00159403	-0.0235765
ENSMUSG00000009376	Met	6	+	17463800	17573980	met proto-oncogene [Source:MGI Symbol;Acc:MGI:96969]	protein_coding	0.176877	0.20688	0.211769
ENSMUSG00000009378	Slc16a12	19	-	34668403	34747289	solute carrier family 16 (monocarboxylic acid transporters), member 12 [Source:MGI Symbol;Acc:MGI:2147716]	protein_coding	0.088613	0.0648605	0.0383283
ENSMUSG00000009394	Syn2	6	+	115134902	115282006	synapsin II [Source:MGI Symbol;Acc:MGI:103020]	protein_coding	0.48115	0.444028	0.399544
ENSMUSG00000009406	Elk1	X	-	20933395	20950608	ELK1, member of ETS oncogene family [Source:MGI Symbol;Acc:MGI:101833]	protein_coding	2.5615	2.44419	2.29235
ENSMUSG00000009418	Nav1	1	-	135434580	135688105	neuron navigator 1 [Source:MGI Symbol;Acc:MGI:2183683]	protein_coding	1.71705	1.66124	1.64182
ENSMUSG00000009470	Tnpo1	13	-	98839019	98926384	transportin 1 [Source:MGI Symbol;Acc:MGI:2681523]	protein_coding	8.76134	8.84981	8.73056
ENSMUSG00000009471	Myod1	7	+	46376474	46379099	myogenic differentiation 1 [Source:MGI Symbol;Acc:MGI:97275]	protein_coding	0.0249588	0.0305835	0.0322932
ENSMUSG00000009487	Otog	7	+	46240987	46311434	otogelin [Source:MGI Symbol;Acc:MGI:1202064]	protein_coding	0.0108656	0.0200873	0.0193143
ENSMUSG00000009535	Rnmt	18	+	68300355	68324852	RNA (guanine-7-) methyltransferase [Source:MGI Symbol;Acc:MGI:1915147]	protein_coding	4.88817	6.12205	6.73311
ENSMUSG00000009545	Kcnq1	7	+	143106362	143427042	potassium voltage-gated channel, subfamily Q, member 1 [Source:MGI Symbol;Acc:MGI:108083]	protein_coding	0.278459	0.223255	0.20128
ENSMUSG00000009549	Srp14	2	-	118475850	118479711	signal recognition particle 14 [Source:MGI Symbol;Acc:MGI:107169]	protein_coding	46.2556	50.3669	51.4937
ENSMUSG00000009551	6330409D20Rik	2	-	32732620	32741016	RIKEN cDNA 6330409D20 gene [Source:MGI Symbol;Acc:MGI:1917980]	protein_coding	0.0705581	0.0200924	-0.0116643
ENSMUSG00000009555	Cdk9	2	-	32705784	32713076	cyclin-dependent kinase 9 (CDC2-related kinase) [Source:MGI Symbol;Acc:MGI:1328368]	protein_coding	4.73401	4.90877	4.98226
ENSMUSG00000009563	Tor2a	2	+	32757234	32762244	torsin family 2, member A [Source:MGI Symbol;Acc:MGI:1353596]	protein_coding	9.12262	8.05044	7.72503
ENSMUSG00000009566	Fpgs	2	-	32682609	32704145	folylpolyglutamyl synthetase [Source:MGI Symbol;Acc:MGI:95576]	protein_coding	0.239539	0.253276	0.249348
ENSMUSG00000009569	Mrtfb	16	+	13256481	13417529	myocardin related transcription factor B [Source:MGI Symbol;Acc:MGI:3050795]	protein_coding	1.8303	2.0252	2.09159
ENSMUSG00000009575	Cbx5	15	-	103191544	103239816	chromobox 5 [Source:MGI Symbol;Acc:MGI:109372]	protein_coding	6.42903	6.82448	7.12696
ENSMUSG00000009580	Odam	5	+	87885029	87894174	odontogenic, ameloblast asssociated [Source:MGI Symbol;Acc:MGI:1916842]	protein_coding	-0.0178188	0.0037593	0.0143289
ENSMUSG00000009585	Apobec3	15	+	79891659	79915906	apolipoprotein B mRNA editing enzyme, catalytic polypeptide 3 [Source:MGI Symbol;Acc:MGI:1933111]	protein_coding	9.1115	9.00805	9.0724
ENSMUSG00000009588	St6galnac1	11	-	116765025	116775507	ST6 (alpha-N-acetyl-neuraminyl-2,3-beta-galactosyl-1,3)-N-acetylgalactosaminide alpha-2,6-sialyltransferase 1 [Source:MGI Symbol;Acc:MGI:1341826]	protein_coding	0.0367947	-0.0257782	-0.00996769
ENSMUSG00000009596	Taf7l	X	-	134460118	134476490	TATA-box binding protein associated factor 7 like [Source:MGI Symbol;Acc:MGI:1921719]	protein_coding	0.0032629	0.00398992	-0.00721343
ENSMUSG00000009614	Sardh	2	-	27188393	27248337	sarcosine dehydrogenase [Source:MGI Symbol;Acc:MGI:2183102]	protein_coding	0.321969	0.321884	0.320909
ENSMUSG00000009621	Vav2	2	-	27262104	27427033	vav 2 oncogene [Source:MGI Symbol;Acc:MGI:102718]	protein_coding	0.46072	0.487304	0.479657
ENSMUSG00000009628	Tex15	8	+	33516738	33585582	testis expressed gene 15 [Source:MGI Symbol;Acc:MGI:1934816]	protein_coding	1.4763	1.54781	1.58382
ENSMUSG00000009630	Ppp2cb	8	+	33599625	33619441	protein phosphatase 2 (formerly 2A), catalytic subunit, beta isoform [Source:MGI Symbol;Acc:MGI:1321161]	protein_coding	155.599	170.935	176.958
ENSMUSG00000009633	G0s2	1	-	193272161	193273217	G0/G1 switch gene 2 [Source:MGI Symbol;Acc:MGI:1316737]	protein_coding	265.526	291.247	304.157
ENSMUSG00000009640	Dmap1	4	-	117674681	117682273	DNA methyltransferase 1-associated protein 1 [Source:MGI Symbol;Acc:MGI:1913483]	protein_coding	0.526657	0.53927	0.551922
ENSMUSG00000009646	Pla2g12b	10	+	59403660	59421976	phospholipase A2, group XIIB [Source:MGI Symbol;Acc:MGI:1917086]	protein_coding	1.53651	1.48203	1.4513
ENSMUSG00000009647	Mcu	10	-	59446984	59616692	mitochondrial calcium uniporter [Source:MGI Symbol;Acc:MGI:3026965]	protein_coding	17.6482	16.6595	16.3125
ENSMUSG00000009654	Oit3	10	-	59422958	59441778	oncoprotein induced transcript 3 [Source:MGI Symbol;Acc:MGI:1201782]	protein_coding	0.00716142	0.0219331	0.0242238
ENSMUSG00000009670	Tex11	X	-	100838648	101059667	testis expressed gene 11 [Source:MGI Symbol;Acc:MGI:1933237]	protein_coding	0.0380269	0.023378	0.012941
ENSMUSG00000009681	Bcr	10	+	75060592	75184921	BCR activator of RhoGEF and GTPase [Source:MGI Symbol;Acc:MGI:88141]	protein_coding	0.893071	0.773837	0.767955
ENSMUSG00000009687	Fxyd5	7	-	31032722	31042481	FXYD domain-containing ion transport regulator 5 [Source:MGI Symbol;Acc:MGI:1201785]	protein_coding	283.011	324.866	351.366
ENSMUSG00000009731	Kcnd1	X	+	7822289	7838280	potassium voltage-gated channel, Shal-related family, member 1 [Source:MGI Symbol;Acc:MGI:96671]	protein_coding	0.0470908	0.0698735	0.0761432
ENSMUSG00000009733	Tfcp2	15	-	100498012	100552008	transcription factor CP2 [Source:MGI Symbol;Acc:MGI:98509]	protein_coding	0.286319	0.278927	0.266934
ENSMUSG00000009734	Pou6f2	13	-	18121098	18397686	POU domain, class 6, transcription factor 2 [Source:MGI Symbol;Acc:MGI:2443631]	protein_coding	1.47313	1.47352	1.45296
ENSMUSG00000009739	Pou6f1	15	-	100575318	100599984	POU domain, class 6, transcription factor 1 [Source:MGI Symbol;Acc:MGI:102935]	protein_coding	0.218743	0.145585	0.104671
ENSMUSG00000009741	Ubp1	9	+	113930934	113977202	upstream binding protein 1 [Source:MGI Symbol;Acc:MGI:104889]	protein_coding	3.26201	2.57477	2.32874
ENSMUSG00000009772	Nuak2	1	+	132316126	132333488	NUAK family, SNF1-like kinase, 2 [Source:MGI Symbol;Acc:MGI:1921387]	protein_coding	1.29351	1.38403	1.38173
ENSMUSG00000009828	Cilk1	9	+	78109192	78172107	ciliogenesis associated kinase 1 [Source:MGI Symbol;Acc:MGI:1934157]	protein_coding	0.302081	0.324756	0.340156
ENSMUSG00000009863	Sdhb	4	+	140961203	140979193	succinate dehydrogenase complex, subunit B, iron sulfur (Ip) [Source:MGI Symbol;Acc:MGI:1914930]	protein_coding	48.9781	50.0012	51.7889
ENSMUSG00000009876	Cox4i2	2	+	152754173	152765037	cytochrome c oxidase subunit 4I2 [Source:MGI Symbol;Acc:MGI:2135755]	protein_coding	-0.0173597	0.00273502	0.0148906
ENSMUSG00000009894	Snap47	11	-	59407134	59451186	synaptosomal-associated protein, 47 [Source:MGI Symbol;Acc:MGI:1915076]	protein_coding	0.538611	0.594922	0.615524
ENSMUSG00000009900	Wnt3a	11	-	59248033	59290752	wingless-type MMTV integration site family, member 3A [Source:MGI Symbol;Acc:MGI:98956]	protein_coding	0.0235058	0.0264429	0.0246435
ENSMUSG00000009905	Kdsr	1	-	106720459	106759727	3-ketodihydrosphingosine reductase [Source:MGI Symbol;Acc:MGI:1918000]	protein_coding	1.1796	1.01448	0.911525
ENSMUSG00000009907	Vps4b	1	-	106764071	106796728	vacuolar protein sorting 4B [Source:MGI Symbol;Acc:MGI:1100499]	protein_coding	10.112	11.171	11.7939
ENSMUSG00000009927	Rps25	9	+	44407139	44410427	ribosomal protein S25 [Source:MGI Symbol;Acc:MGI:1922867]	protein_coding	185.963	190.914	194.155
ENSMUSG00000009941	Nxf2	X	-	134944526	134964754	nuclear RNA export factor 2 [Source:MGI Symbol;Acc:MGI:1933192]	protein_coding	0.0351284	0.0633406	0.0702973
ENSMUSG00000009995	Taz	X	+	74281912	74290151	tafazzin [Source:MGI Symbol;Acc:MGI:109626]	protein_coding	11.0834	11.356	11.5635
ENSMUSG00000010021	Kif19a	11	+	114765388	114790739	kinesin family member 19A [Source:MGI Symbol;Acc:MGI:2447024]	protein_coding	0.119479	0.126654	0.125359
ENSMUSG00000010025	Aldh3a2	11	-	61223417	61267464	aldehyde dehydrogenase family 3, subfamily A2 [Source:MGI Symbol;Acc:MGI:1353452]	protein_coding	3.56807	3.35545	3.28015
ENSMUSG00000010044	Zmynd10	9	+	107547298	107551319	zinc finger, MYND domain containing 10 [Source:MGI Symbol;Acc:MGI:2387863]	protein_coding	-0.00571671	-0.00236912	0.00813798
ENSMUSG00000010045	Tmem115	9	+	107533945	107538673	transmembrane protein 115 [Source:MGI Symbol;Acc:MGI:1930765]	protein_coding	1.11337	1.26759	1.26171
ENSMUSG00000010047	Hyal2	9	+	107567945	107572779	hyaluronoglucosaminidase 2 [Source:MGI Symbol;Acc:MGI:1196334]	protein_coding	0.780845	0.798308	0.802477
ENSMUSG00000010048	Ifrd2	9	+	107587642	107593385	interferon-related developmental regulator 2 [Source:MGI Symbol;Acc:MGI:1316708]	protein_coding	0.220348	0.29926	0.3501
ENSMUSG00000010051	Hyal1	9	+	107576927	107581710	hyaluronoglucosaminidase 1 [Source:MGI Symbol;Acc:MGI:96298]	protein_coding	2.15218	2.06793	2.07222
ENSMUSG00000010054	Tusc2	9	+	107563255	107566112	tumor suppressor 2, mitochondrial calcium regulator [Source:MGI Symbol;Acc:MGI:1931086]	protein_coding	3.54619	4.16295	4.61997
ENSMUSG00000010057	Nprl2	9	+	107542226	107545706	NPR2 like, GATOR1 complex subunit [Source:MGI Symbol;Acc:MGI:1914482]	protein_coding	0.924029	0.956346	0.990191
ENSMUSG00000010064	Slc38a3	9	-	107650634	107669530	solute carrier family 38, member 3 [Source:MGI Symbol;Acc:MGI:1923507]	protein_coding	0.289246	0.259386	0.238899
ENSMUSG00000010066	Cacna2d2	9	+	107399612	107529343	calcium channel, voltage-dependent, alpha 2/delta subunit 2 [Source:MGI Symbol;Acc:MGI:1929813]	protein_coding	0.233192	0.252007	0.248284
ENSMUSG00000010067	Rassf1	9	+	107551555	107562267	Ras association (RalGDS/AF-6) domain family member 1 [Source:MGI Symbol;Acc:MGI:1928386]	protein_coding	1.49301	1.89729	2.07102
ENSMUSG00000010080	Epn3	11	-	94489599	94499974	epsin 3 [Source:MGI Symbol;Acc:MGI:1919139]	protein_coding	0.0516335	0.0724116	0.0815979
ENSMUSG00000010086	Rnf112	11	-	61448442	61454131	ring finger protein 112 [Source:MGI Symbol;Acc:MGI:106611]	protein_coding	0.165174	0.157888	0.153913
ENSMUSG00000010095	Slc3a2	19	-	8706882	8723369	solute carrier family 3 (activators of dibasic and neutral amino acid transport), member 2 [Source:MGI Symbol;Acc:MGI:96955]	protein_coding	11.8697	13.2029	14.1106
ENSMUSG00000010097	Nxf1	19	+	8757073	8770922	nuclear RNA export factor 1 [Source:MGI Symbol;Acc:MGI:1858330]	protein_coding	3.4869	3.7972	4.06404
ENSMUSG00000010110	Stx5a	19	+	8741413	8756069	syntaxin 5A [Source:MGI Symbol;Acc:MGI:1928483]	protein_coding	4.27675	4.45562	4.32861
ENSMUSG00000010122	Slc47a1	11	-	61343401	61378345	solute carrier family 47, member 1 [Source:MGI Symbol;Acc:MGI:1914723]	protein_coding	0.570532	0.548376	0.548422
ENSMUSG00000010136	Pifo	3	-	105996957	106014646	primary cilia formation [Source:MGI Symbol;Acc:MGI:1923670]	protein_coding	-0.0252031	0.00715908	0.0185628
ENSMUSG00000010142	Tnfrsf13b	11	+	61126755	61149372	tumor necrosis factor receptor superfamily, member 13b [Source:MGI Symbol;Acc:MGI:1889411]	protein_coding	-0.040821	0.058527	0.0890649
ENSMUSG00000010154	Spire2	8	+	123332713	123369515	spire type actin nucleation factor 2 [Source:MGI Symbol;Acc:MGI:2446256]	protein_coding	0.234904	0.220909	0.23282
ENSMUSG00000010175	Prox1	1	-	190118035	190170714	prospero homeobox 1 [Source:MGI Symbol;Acc:MGI:97772]	protein_coding	0.0967166	0.0924606	0.0899993
ENSMUSG00000010205	Raver1	9	-	21074158	21092008	ribonucleoprotein, PTB-binding 1 [Source:MGI Symbol;Acc:MGI:1919016]	protein_coding	0.896641	0.915484	0.941395
ENSMUSG00000010277	2610507B11Rik	11	+	78261752	78290623	RIKEN cDNA 2610507B11 gene [Source:MGI Symbol;Acc:MGI:1919753]	protein_coding	4.28002	4.80885	5.15611
ENSMUSG00000010290	AI597479	1	+	43098710	43115947	expressed sequence AI597479 [Source:MGI Symbol;Acc:MGI:2138299]	protein_coding	1.38081	1.33217	1.36315
ENSMUSG00000010307	Tmem86a	7	+	47050601	47054777	transmembrane protein 86A [Source:MGI Symbol;Acc:MGI:1915143]	protein_coding	2.77293	2.867	2.97139
ENSMUSG00000010311	Optc	1	-	133897199	133907999	opticin [Source:MGI Symbol;Acc:MGI:2151113]	protein_coding	0.0617768	-0.00249321	-0.0119727
ENSMUSG00000010342	Tex14	11	+	87405065	87555823	testis expressed gene 14 [Source:MGI Symbol;Acc:MGI:1933227]	protein_coding	0.349815	0.381847	0.400027
ENSMUSG00000010358	Ifi35	11	+	101448407	101458698	interferon-induced protein 35 [Source:MGI Symbol;Acc:MGI:1917360]	protein_coding	4.42644	4.45662	4.4727
ENSMUSG00000010362	Rdm1	11	+	101627195	101636100	RAD52 motif 1 [Source:MGI Symbol;Acc:MGI:1913849]	protein_coding	0.546871	0.555445	0.535665
ENSMUSG00000010376	Nedd8	14	-	55662263	55672124	neural precursor cell expressed, developmentally down-regulated gene 8 [Source:MGI Symbol;Acc:MGI:97301]	protein_coding	66.2123	59.562	56.2932
ENSMUSG00000010392	Gosr1	11	-	76726602	76763579	golgi SNAP receptor complex member 1 [Source:MGI Symbol;Acc:MGI:1858260]	protein_coding	7.19217	6.97704	6.76871
ENSMUSG00000010406	Mrpl52	14	+	54426909	54429756	mitochondrial ribosomal protein L52 [Source:MGI Symbol;Acc:MGI:1916086]	protein_coding	0.596645	0.399856	0.344446
ENSMUSG00000010435	Spaca7	8	+	12573029	12600744	sperm acrosome associated 7 [Source:MGI Symbol;Acc:MGI:1925884]	protein_coding	-0.00752154	0.00280375	0.00476144
ENSMUSG00000010453	Kansl3	1	-	36335730	36369181	KAT8 regulatory NSL complex subunit 3 [Source:MGI Symbol;Acc:MGI:1918055]	protein_coding	3.14342	3.22091	3.15003
ENSMUSG00000010461	Eya4	10	-	23102963	23350786	EYA transcriptional coactivator and phosphatase 4 [Source:MGI Symbol;Acc:MGI:1337104]	protein_coding	0.155642	0.154345	0.147169
ENSMUSG00000010476	Ebf3	7	-	137193673	137314445	early B cell factor 3 [Source:MGI Symbol;Acc:MGI:894289]	protein_coding	0.129253	0.121159	0.116686
ENSMUSG00000010492	Uckl1os	2	+	181578480	181585170	uridine-cytidine kinase 1-like 1, opposite strand [Source:MGI Symbol;Acc:MGI:3801877]	antisense	0.0380116	0.0404541	0.0419104
ENSMUSG00000010505	Myt1	2	+	181763332	181827797	myelin transcription factor 1 [Source:MGI Symbol;Acc:MGI:1100535]	protein_coding	0.110926	0.0528362	0.0282661
ENSMUSG00000010517	Faf1	4	+	109676588	109963960	Fas-associated factor 1 [Source:MGI Symbol;Acc:MGI:109419]	protein_coding	1.64314	1.77846	1.77522
ENSMUSG00000010529	Gm266	12	-	111484609	111485823	predicted gene 266 [Source:MGI Symbol;Acc:MGI:2685112]	protein_coding	0.0503112	0.0451469	0.039485
ENSMUSG00000010538	Tsacc	3	-	88282757	88296999	TSSK6 activating co-chaperone [Source:MGI Symbol;Acc:MGI:1924177]	protein_coding	-0.012272	0.0100302	0.00237046
ENSMUSG00000010554	Mettl16	11	+	74770830	74828525	methyltransferase like 16 [Source:MGI Symbol;Acc:MGI:1914743]	protein_coding	0.565769	0.628106	0.640729
ENSMUSG00000010592	Dazl	17	-	50279395	50293636	deleted in azoospermia-like [Source:MGI Symbol;Acc:MGI:1342328]	protein_coding	0.338233	0.415419	0.436224
ENSMUSG00000010601	Apol7a	15	-	77388219	77399110	apolipoprotein L 7a [Source:MGI Symbol;Acc:MGI:1923011]	protein_coding	1.10057	1.0003	0.948676
ENSMUSG00000010607	Pigyl	9	+	22156846	22158358	phosphatidylinositol glycan anchor biosynthesis, class Y-like [Source:MGI Symbol;Acc:MGI:1913518]	protein_coding	2.33068	2.81692	3.11256
ENSMUSG00000010608	Rbm25	12	+	83631236	83683123	RNA binding motif protein 25 [Source:MGI Symbol;Acc:MGI:1914289]	protein_coding	92.8492	102.385	107.871
ENSMUSG00000010609	Psen2	1	-	180227004	180263438	presenilin 2 [Source:MGI Symbol;Acc:MGI:109284]	protein_coding	5.89387	6.02433	6.11855
ENSMUSG00000010651	Acaa1b	9	-	119148023	119157093	acetyl-Coenzyme A acyltransferase 1B [Source:MGI Symbol;Acc:MGI:3605455]	protein_coding	6.44299	6.37384	6.30859
ENSMUSG00000010660	Plcd1	9	-	119071527	119093502	phospholipase C, delta 1 [Source:MGI Symbol;Acc:MGI:97614]	protein_coding	0.408748	0.389984	0.374852
ENSMUSG00000010663	Fads1	19	+	10182888	10196877	fatty acid desaturase 1 [Source:MGI Symbol;Acc:MGI:1923517]	protein_coding	1.6287	1.49381	1.42277
ENSMUSG00000010721	Lmbr1	5	-	29229802	29378390	limb region 1 [Source:MGI Symbol;Acc:MGI:1861746]	protein_coding	0.229116	0.211738	0.187714
ENSMUSG00000010751	Tnfrsf22	7	-	143634806	143649661	tumor necrosis factor receptor superfamily, member 22 [Source:MGI Symbol;Acc:MGI:1930270]	protein_coding	1.0166	0.997255	1.02523
ENSMUSG00000010755	Cars	7	-	143557230	143600090	cysteinyl-tRNA synthetase [Source:MGI Symbol;Acc:MGI:1351477]	protein_coding	1.86386	1.94837	1.9661
ENSMUSG00000010760	Phlda2	7	-	143501545	143503150	pleckstrin homology like domain, family A, member 2 [Source:MGI Symbol;Acc:MGI:1202307]	protein_coding	0.0369414	0.118442	0.164076
ENSMUSG00000010796	Asz1	6	-	18050964	18109061	ankyrin repeat, SAM and basic leucine zipper domain containing 1 [Source:MGI Symbol;Acc:MGI:1921318]	protein_coding	0.144029	0.120288	0.12996
ENSMUSG00000010797	Wnt2	6	-	17988940	18030585	wingless-type MMTV integration site family, member 2 [Source:MGI Symbol;Acc:MGI:98954]	protein_coding	0.0311865	0.0502394	0.0427236
ENSMUSG00000010803	Gabra1	11	-	42130939	42182930	gamma-aminobutyric acid (GABA) A receptor, subunit alpha 1 [Source:MGI Symbol;Acc:MGI:95613]	protein_coding	0.292709	0.229093	0.239006
ENSMUSG00000010825	Grid2ip	5	+	143357338	143392152	glutamate receptor, ionotropic, delta 2 (Grid2) interacting protein 1 [Source:MGI Symbol;Acc:MGI:2176213]	protein_coding	0.145851	0.0755774	0.0569332
ENSMUSG00000010830	Kdelr3	15	+	79516411	79527739	KDEL (Lys-Asp-Glu-Leu) endoplasmic reticulum protein retention receptor 3 [Source:MGI Symbol;Acc:MGI:2145953]	protein_coding	0.276051	0.24664	0.222226
ENSMUSG00000010841	Cfap97d1	11	+	101984279	101992264	CFAP97 domain containing 1 [Source:MGI Symbol;Acc:MGI:1922687]	protein_coding	0.0349777	0.0516853	0.0547448
ENSMUSG00000010911	Apip	2	+	103073675	103092644	APAF1 interacting protein [Source:MGI Symbol;Acc:MGI:1926788]	protein_coding	4.16932	3.49077	3.04807
ENSMUSG00000010914	Pdhx	2	-	103021075	103073513	pyruvate dehydrogenase complex, component X [Source:MGI Symbol;Acc:MGI:1351627]	protein_coding	0.669994	0.700623	0.704001
ENSMUSG00000010936	Vac14	8	+	110618585	110720398	Vac14 homolog (S. cerevisiae) [Source:MGI Symbol;Acc:MGI:2157980]	protein_coding	7.61848	8.13912	8.29707
ENSMUSG00000011008	Mcoln2	3	+	146149833	146195513	mucolipin 2 [Source:MGI Symbol;Acc:MGI:1915529]	protein_coding	0.284269	0.203688	0.181696
ENSMUSG00000011034	Slc5a1	5	+	33104219	33162870	solute carrier family 5 (sodium/glucose cotransporter), member 1 [Source:MGI Symbol;Acc:MGI:107678]	protein_coding	3.10603	3.16326	3.19709
ENSMUSG00000011096	Akt1s1	7	+	44848991	44855421	AKT1 substrate 1 (proline-rich) [Source:MGI Symbol;Acc:MGI:1914855]	protein_coding	3.19536	2.92366	2.83726
ENSMUSG00000011114	Tbrg1	9	-	37648763	37657312	transforming growth factor beta regulated gene 1 [Source:MGI Symbol;Acc:MGI:1100877]	protein_coding	4.63539	4.98379	5.17471
ENSMUSG00000011118	Panx3	9	-	37659902	37669235	pannexin 3 [Source:MGI Symbol;Acc:MGI:1918881]	protein_coding	0.0617508	0.0177454	0.00298084
ENSMUSG00000011148	Adssl1	12	+	112620045	112641360	adenylosuccinate synthetase like 1 [Source:MGI Symbol;Acc:MGI:87947]	protein_coding	5.40835	5.38456	5.44197
ENSMUSG00000011154	Cfap161	7	-	83774101	83794880	cilia and flagella associated protein 161 [Source:MGI Symbol;Acc:MGI:1922806]	protein_coding	0.0185247	0.032956	0.0380145
ENSMUSG00000011158	Brf1	12	-	112960085	113000704	BRF1, RNA polymerase III transcription initiation factor 90 kDa subunit [Source:MGI Symbol;Acc:MGI:1919558]	protein_coding	5.19695	5.50754	5.53937
ENSMUSG00000011171	Vipr2	12	+	116077726	116146261	vasoactive intestinal peptide receptor 2 [Source:MGI Symbol;Acc:MGI:107166]	protein_coding	0.0518677	0.0556912	0.0554996
ENSMUSG00000011179	Odc1	12	+	17544794	17551505	ornithine decarboxylase, structural 1 [Source:MGI Symbol;Acc:MGI:97402]	protein_coding	2.95953	2.94409	2.91644
ENSMUSG00000011254	Thg1l	11	-	45946843	45955494	tRNA-histidine guanylyltransferase 1-like (S. cerevisiae) [Source:MGI Symbol;Acc:MGI:1913878]	protein_coding	0.167765	0.180608	0.229025
ENSMUSG00000011256	Adam19	11	+	46055992	46147343	a disintegrin and metallopeptidase domain 19 (meltrin beta) [Source:MGI Symbol;Acc:MGI:105377]	protein_coding	3.14735	2.76708	2.52099
ENSMUSG00000011257	Pabpc4	4	+	123262351	123298925	poly(A) binding protein, cytoplasmic 4 [Source:MGI Symbol;Acc:MGI:2385206]	protein_coding	10.5125	9.65135	9.39182
ENSMUSG00000011263	Exoc3l2	7	+	19463331	19496762	exocyst complex component 3-like 2 [Source:MGI Symbol;Acc:MGI:1921713]	protein_coding	0.0724274	0.070957	0.081662
ENSMUSG00000011267	Zfp296	7	+	19577287	19580656	zinc finger protein 296 [Source:MGI Symbol;Acc:MGI:1926956]	protein_coding	1.0093	0.968186	0.96537
ENSMUSG00000011305	Plin5	17	-	56111601	56117596	perilipin 5 [Source:MGI Symbol;Acc:MGI:1914218]	protein_coding	0.144644	0.142656	0.140274
ENSMUSG00000011306	Sugp1	8	+	70042813	70072347	SURP and G patch domain containing 1 [Source:MGI Symbol;Acc:MGI:1917866]	protein_coding	10.5278	11.4369	11.7504
ENSMUSG00000011349	Dmrtc2	7	+	24870057	24877651	doublesex and mab-3 related transcription factor like family C2 [Source:MGI Symbol;Acc:MGI:1918491]	protein_coding	6.89417	7.07053	6.95972
ENSMUSG00000011350	Gm5893	7	+	24818795	24840275	predicted gene 5893 [Source:MGI Symbol;Acc:MGI:3645761]	processed_transcript	0.0148425	0.0304989	0.0370369
ENSMUSG00000011382	Dhdh	7	-	45470987	45488805	dihydrodiol dehydrogenase (dimeric) [Source:MGI Symbol;Acc:MGI:1919005]	protein_coding	0.911237	0.884719	0.88171
ENSMUSG00000011427	Zfp790	7	+	29816114	29831005	zinc finger protein 790 [Source:MGI Symbol;Acc:MGI:1923431]	protein_coding	0.676172	0.751303	0.776127
ENSMUSG00000011463	Cpb1	3	-	20248264	20275733	carboxypeptidase B1 (tissue) [Source:MGI Symbol;Acc:MGI:1923953]	protein_coding	0.0625287	-0.0241665	-0.0355414
ENSMUSG00000011486	Slc25a41	17	-	57032773	57041654	solute carrier family 25, member 41 [Source:MGI Symbol;Acc:MGI:2144215]	protein_coding	-0.0265306	0.00532328	0.0218142
ENSMUSG00000011589	Fsd1	17	+	55986509	55996881	fibronectin type 3 and SPRY domain-containing protein [Source:MGI Symbol;Acc:MGI:1934858]	protein_coding	0.401849	0.309802	0.270997
ENSMUSG00000011632	Pinlyp	7	-	24541658	24546118	phospholipase A2 inhibitor and LY6/PLAUR domain containing [Source:MGI Symbol;Acc:MGI:3615324]	protein_coding	0.254495	0.27187	0.25777
ENSMUSG00000011658	Fuz	7	+	44896079	44902631	fuzzy planar cell polarity protein [Source:MGI Symbol;Acc:MGI:1917550]	protein_coding	0.36254	0.372754	0.377678
ENSMUSG00000011751	Sptbn4	7	-	27356383	27447686	spectrin beta, non-erythrocytic 4 [Source:MGI Symbol;Acc:MGI:1890574]	protein_coding	0.101324	0.068587	0.0566114
ENSMUSG00000011752	Pgam1	19	+	41911923	41918660	phosphoglycerate mutase 1 [Source:MGI Symbol;Acc:MGI:97552]	protein_coding	50.6317	50.1721	50.1879
ENSMUSG00000011831	Evi5	5	-	107744795	107875107	ecotropic viral integration site 5 [Source:MGI Symbol;Acc:MGI:104736]	protein_coding	1.24185	1.20569	1.18154
ENSMUSG00000011832	Evi5l	8	+	4166567	4211257	ecotropic viral integration site 5 like [Source:MGI Symbol;Acc:MGI:2442167]	protein_coding	1.21341	1.35353	1.34421
ENSMUSG00000011837	Snapc2	8	+	4253080	4256220	small nuclear RNA activating complex, polypeptide 2 [Source:MGI Symbol;Acc:MGI:1914861]	protein_coding	3.12004	3.62827	3.87628
ENSMUSG00000011877	Git1	11	+	77493562	77507786	GIT ArfGAP 1 [Source:MGI Symbol;Acc:MGI:1927140]	protein_coding	0.712761	0.657633	0.655907
ENSMUSG00000011884	Gltp	5	-	114669398	114690984	glycolipid transfer protein [Source:MGI Symbol;Acc:MGI:1929253]	protein_coding	12.6972	12.153	12.1957
ENSMUSG00000011958	Bnip2	9	+	69989466	70008317	BCL2/adenovirus E1B interacting protein 2 [Source:MGI Symbol;Acc:MGI:109327]	protein_coding	23.5818	20.6169	19.4754
ENSMUSG00000011960	Ccnt1	15	-	98538689	98570923	cyclin T1 [Source:MGI Symbol;Acc:MGI:1328363]	protein_coding	2.86983	2.87052	2.94477
ENSMUSG00000012017	Scarf2	16	+	17797282	17808293	scavenger receptor class F, member 2 [Source:MGI Symbol;Acc:MGI:1858430]	protein_coding	-0.00988559	0.0238801	0.031082
ENSMUSG00000012042	4930579F01Rik	3	-	138164078	138239663	RIKEN cDNA 4930579F01 gene [Source:MGI Symbol;Acc:MGI:1914991]	protein_coding	0.0507196	0.0149177	0.0169525
ENSMUSG00000012076	Brms1l	12	+	55836324	55869736	breast cancer metastasis-suppressor 1-like [Source:MGI Symbol;Acc:MGI:1196337]	protein_coding	0.424012	0.42984	0.420343
ENSMUSG00000012114	Med15	16	-	17651208	17732891	mediator complex subunit 15 [Source:MGI Symbol;Acc:MGI:2137379]	protein_coding	13.8532	13.2031	12.7345
ENSMUSG00000012117	Dhdds	4	-	133969028	134000918	dehydrodolichyl diphosphate synthase [Source:MGI Symbol;Acc:MGI:1914672]	protein_coding	8.23398	8.13715	8.12755
ENSMUSG00000012123	Crybg2	4	+	134060815	134092504	crystallin beta-gamma domain containing 2 [Source:MGI Symbol;Acc:MGI:1334463]	protein_coding	1.49149	1.50185	1.50792
ENSMUSG00000012126	Ubxn11	4	+	134102570	134127593	UBX domain protein 11 [Source:MGI Symbol;Acc:MGI:1914836]	protein_coding	0.557856	0.409227	0.332026
ENSMUSG00000012187	Mogat1	1	+	78510991	78538173	monoacylglycerol O-acyltransferase 1 [Source:MGI Symbol;Acc:MGI:1915643]	protein_coding	0.00629543	-0.00105449	-0.00520705
ENSMUSG00000012211	Tex22	12	+	113074502	113088917	testis expressed gene 22 [Source:MGI Symbol;Acc:MGI:1922921]	protein_coding	0.0189982	-0.0024106	-0.0162726
ENSMUSG00000012282	Wnt8a	18	+	34542313	34548273	wingless-type MMTV integration site family, member 8A [Source:MGI Symbol;Acc:MGI:107924]	protein_coding	0.0188877	-0.0065856	-0.0120312
ENSMUSG00000012296	Tjap1	17	-	46257851	46283026	tight junction associated protein 1 [Source:MGI Symbol;Acc:MGI:1921344]	protein_coding	0.903368	0.88678	0.94214
ENSMUSG00000012350	Ehf	2	-	103263433	103303278	ets homologous factor [Source:MGI Symbol;Acc:MGI:1270840]	protein_coding	1.95641	1.70859	1.70285
ENSMUSG00000012396	Nanog	6	+	122707489	122714633	Nanog homeobox [Source:MGI Symbol;Acc:MGI:1919200]	protein_coding	0.108154	0.0716019	0.0630143
ENSMUSG00000012405	Rpl15	14	-	18267823	18271391	ribosomal protein L15 [Source:MGI Symbol;Acc:MGI:1913730]	protein_coding	30.3126	32.673	33.8422
ENSMUSG00000012422	Tmem167	13	+	90089123	90143907	transmembrane protein 167 [Source:MGI Symbol;Acc:MGI:1913324]	protein_coding	7.06614	7.51914	7.68192
ENSMUSG00000012428	Steap4	5	+	7960457	7982213	STEAP family member 4 [Source:MGI Symbol;Acc:MGI:1923560]	protein_coding	0.175547	0.160202	0.148286
ENSMUSG00000012429	Mplkip	13	+	17695192	17699748	M-phase specific PLK1 intereacting protein [Source:MGI Symbol;Acc:MGI:1913558]	protein_coding	1.9184	2.12136	2.13562
ENSMUSG00000012443	Kif11	19	+	37376403	37421859	kinesin family member 11 [Source:MGI Symbol;Acc:MGI:1098231]	protein_coding	2.81505	2.86431	2.89005
ENSMUSG00000012483	Rpa3	6	-	8255936	8259173	replication protein A3 [Source:MGI Symbol;Acc:MGI:1915490]	protein_coding	29.3013	22.6348	20.2768
ENSMUSG00000012519	Mlkl	8	-	111311797	111338177	mixed lineage kinase domain-like [Source:MGI Symbol;Acc:MGI:1921818]	protein_coding	0.089196	0.10816	0.139123
ENSMUSG00000012520	Phox2b	5	-	67094399	67099301	paired-like homeobox 2b [Source:MGI Symbol;Acc:MGI:1100882]	protein_coding	0.123762	0.142833	0.146371
ENSMUSG00000012535	Tnpo3	6	-	29540827	29609887	transportin 3 [Source:MGI Symbol;Acc:MGI:1196412]	protein_coding	18.6332	18.7551	18.9947
ENSMUSG00000012609	Ttll5	12	+	85824659	86061893	tubulin tyrosine ligase-like family, member 5 [Source:MGI Symbol;Acc:MGI:2443657]	protein_coding	0.186971	0.161475	0.138475
ENSMUSG00000012640	Zfp715	7	-	43296197	43313294	zinc finger protein 715 [Source:MGI Symbol;Acc:MGI:1917180]	protein_coding	1.28859	1.09109	1.06268
ENSMUSG00000012705	Retn	8	+	3655770	3660110	resistin [Source:MGI Symbol;Acc:MGI:1888506]	protein_coding	6.61348	6.49398	6.42593
ENSMUSG00000012777	Acp4	7	-	44252148	44257378	acid phosphatase 4 [Source:MGI Symbol;Acc:MGI:3644563]	protein_coding	0.0269226	-0.0117623	-0.0146265
ENSMUSG00000012819	Cdh23	10	-	60302748	60696490	cadherin 23 (otocadherin) [Source:MGI Symbol;Acc:MGI:1890219]	protein_coding	6.7738	6.81912	6.7974
ENSMUSG00000012848	Rps5	7	+	12922290	12926686	ribosomal protein S5 [Source:MGI Symbol;Acc:MGI:1097682]	protein_coding	1337.96	1200.09	1130.88
ENSMUSG00000012889	Podnl1	8	+	84125989	84132527	podocan-like 1 [Source:MGI Symbol;Acc:MGI:2685352]	protein_coding	0.423929	0.387927	0.377148
ENSMUSG00000013033	Adgrl1	8	+	83900105	83941954	adhesion G protein-coupled receptor L1 [Source:MGI Symbol;Acc:MGI:1929461]	protein_coding	0.269552	0.247766	0.259007
ENSMUSG00000013076	Amotl1	9	-	14541966	14645056	angiomotin-like 1 [Source:MGI Symbol;Acc:MGI:1922973]	protein_coding	0.208823	0.197813	0.189387
ENSMUSG00000013083	2200002J24Rik	7	+	30698926	30700536	RIKEN cDNA 2200002J24 gene [Source:MGI Symbol;Acc:MGI:1916397]	protein_coding	0.0143007	-0.00287119	-0.0112602
ENSMUSG00000013089	Etv5	16	-	22381309	22439719	ets variant 5 [Source:MGI Symbol;Acc:MGI:1096867]	protein_coding	0.322939	0.304347	0.295206
ENSMUSG00000013091	Tmem190	7	+	4782937	4784341	transmembrane protein 190 [Source:MGI Symbol;Acc:MGI:1925302]	protein_coding	0.130618	0.120073	0.110157
ENSMUSG00000013150	Gfod2	8	-	105713854	105758664	glucose-fructose oxidoreductase domain containing 2 [Source:MGI Symbol;Acc:MGI:1917825]	protein_coding	0.102616	0.103075	0.0946312
ENSMUSG00000013155	Enkd1	8	-	105703651	105708210	enkurin domain containing 1 [Source:MGI Symbol;Acc:MGI:2142593]	protein_coding	2.49431	2.29238	2.25095
ENSMUSG00000013158	4933405L10Rik	8	+	105707655	105710246	RIKEN cDNA 4933405L10 gene [Source:MGI Symbol;Acc:MGI:1918296]	protein_coding	0.0170889	-0.004201	-0.012654
ENSMUSG00000013160	Atp6v0d1	8	-	105524465	105566047	ATPase, H+ transporting, lysosomal V0 subunit D1 [Source:MGI Symbol;Acc:MGI:1201778]	protein_coding	9.53045	8.93758	8.66064
ENSMUSG00000013236	Ptprs	17	-	56412426	56476483	protein tyrosine phosphatase, receptor type, S [Source:MGI Symbol;Acc:MGI:97815]	protein_coding	2.79673	2.66368	2.62618
ENSMUSG00000013275	Slc41a1	1	+	131827493	131848865	solute carrier family 41, member 1 [Source:MGI Symbol;Acc:MGI:2444823]	protein_coding	0.356195	0.389034	0.392864
ENSMUSG00000013338	Fer1l4	2	-	156019139	156052947	fer-1-like 4 (C. elegans) [Source:MGI Symbol;Acc:MGI:1921812]	protein_coding	0.0251186	0.0326025	0.0350891
ENSMUSG00000013353	4931406B18Rik	7	-	43492044	43505940	RIKEN cDNA 4931406B18 gene [Source:MGI Symbol;Acc:MGI:1921304]	protein_coding	0.152523	0.15019	0.1432
ENSMUSG00000013367	Iglon5	7	-	43472904	43490075	IgLON family member 5 [Source:MGI Symbol;Acc:MGI:2686277]	protein_coding	0.0885987	0.0815209	0.0752526
ENSMUSG00000013415	Igf2bp1	11	-	95957163	96005940	insulin-like growth factor 2 mRNA binding protein 1 [Source:MGI Symbol;Acc:MGI:1890357]	protein_coding	0.0970469	0.0856111	0.0857386
ENSMUSG00000013418	B4galnt2	11	-	95865943	95914891	beta-1,4-N-acetyl-galactosaminyl transferase 2 [Source:MGI Symbol;Acc:MGI:1342058]	protein_coding	1.47199	1.44082	1.42372
ENSMUSG00000013419	Zfp651	9	+	121759330	121771742	zinc finger protein 651 [Source:MGI Symbol;Acc:MGI:2670992]	protein_coding	0.204248	0.157713	0.132564
ENSMUSG00000013465	Nelfb	2	-	25199712	25211489	negative elongation factor complex member B [Source:MGI Symbol;Acc:MGI:1931035]	protein_coding	2.23317	2.0858	2.00349
ENSMUSG00000013483	Card14	11	+	119307768	119345375	caspase recruitment domain family, member 14 [Source:MGI Symbol;Acc:MGI:2386258]	protein_coding	0.149419	0.132036	0.121462
ENSMUSG00000013495	Tmem175	5	+	108629770	108648782	transmembrane protein 175 [Source:MGI Symbol;Acc:MGI:1919642]	protein_coding	7.25943	7.12494	7.07096
ENSMUSG00000013523	Bcas1	2	-	170346991	170427845	breast carcinoma amplified sequence 1 [Source:MGI Symbol;Acc:MGI:1924210]	protein_coding	0.589024	0.581998	0.586715
ENSMUSG00000013539	Tango2	16	-	18300825	18348103	transport and golgi organization 2 [Source:MGI Symbol;Acc:MGI:101825]	protein_coding	4.0601	4.31857	4.64492
ENSMUSG00000013562	4833413E03Rik	17	+	31557126	31559113	RIKEN cDNA 4833413E03 gene [Source:MGI Symbol;Acc:MGI:1925354]	lincRNA	0.0249749	-0.00293465	-0.0214947
ENSMUSG00000013584	Aldh1a2	9	+	71215789	71296243	aldehyde dehydrogenase family 1, subfamily A2 [Source:MGI Symbol;Acc:MGI:107928]	protein_coding	0.179206	0.171227	0.159214
ENSMUSG00000013593	Ndufs2	1	-	171234853	171251388	NADH:ubiquinone oxidoreductase core subunit S2 [Source:MGI Symbol;Acc:MGI:2385112]	protein_coding	58.967	54.4597	53.1852
ENSMUSG00000013611	Snx31	15	-	36504062	36555573	sorting nexin 31 [Source:MGI Symbol;Acc:MGI:1913946]	protein_coding	0.184229	0.214709	0.20529
ENSMUSG00000013622	Atraid	5	+	31048312	31054623	all-trans retinoic acid induced differentiation factor [Source:MGI Symbol;Acc:MGI:1918918]	protein_coding	17.7132	17.0672	16.3643
ENSMUSG00000013629	Cad	5	+	31054780	31078479	carbamoyl-phosphate synthetase 2, aspartate transcarbamylase, and dihydroorotase [Source:MGI Symbol;Acc:MGI:1916969]	protein_coding	0.888371	0.930281	0.965798
ENSMUSG00000013643	Lypd8	11	+	58379043	58390728	LY6/PLAUR domain containing 8 [Source:MGI Symbol;Acc:MGI:1917413]	protein_coding	1.54893	1.72449	1.81456
ENSMUSG00000013646	Sh3bp5l	11	+	58330724	58347728	SH3 binding domain protein 5 like [Source:MGI Symbol;Acc:MGI:1933124]	protein_coding	0.947482	0.990959	0.992545
ENSMUSG00000013653	1810065E05Rik	11	+	58421111	58426024	RIKEN cDNA 1810065E05 gene [Source:MGI Symbol;Acc:MGI:1917114]	protein_coding	0.150382	0.166883	0.171247
ENSMUSG00000013662	Atad1	19	-	32671638	32739786	ATPase family, AAA domain containing 1 [Source:MGI Symbol;Acc:MGI:1915229]	protein_coding	2.63658	2.93982	3.11777
ENSMUSG00000013663	Pten	19	+	32757497	32826160	phosphatase and tensin homolog [Source:MGI Symbol;Acc:MGI:109583]	protein_coding	9.2781	9.1355	8.88464
ENSMUSG00000013668	4933402N03Rik	7	-	131137713	131146314	RIKEN cDNA 4933402N03 gene [Source:MGI Symbol;Acc:MGI:1914681]	protein_coding	0.0641075	0.114464	0.133854
ENSMUSG00000013698	Pea15a	1	-	172196728	172206804	phosphoprotein enriched in astrocytes 15A [Source:MGI Symbol;Acc:MGI:104799]	protein_coding	0.966342	1.08083	1.17036
ENSMUSG00000013701	Timm23	14	-	32180162	32201898	translocase of inner mitochondrial membrane 23 [Source:MGI Symbol;Acc:MGI:1858317]	protein_coding	3.54592	3.66912	3.77481
ENSMUSG00000013707	Tnfaip8l2	3	-	95139521	95142360	tumor necrosis factor, alpha-induced protein 8-like 2 [Source:MGI Symbol;Acc:MGI:1917019]	protein_coding	1.78151	1.92518	2.02233
ENSMUSG00000013736	Trnt1	6	+	106769120	106782474	tRNA nucleotidyl transferase, CCA-adding, 1 [Source:MGI Symbol;Acc:MGI:1917297]	protein_coding	12.2262	13.8618	14.4553
ENSMUSG00000013766	Ly6g6e	17	+	35076902	35078804	lymphocyte antigen 6 complex, locus G6E [Source:MGI Symbol;Acc:MGI:1917524]	protein_coding	0.00794339	-0.0206648	0.0130537
ENSMUSG00000013787	Ehmt2	17	+	34898469	34914052	euchromatic histone lysine N-methyltransferase 2 [Source:MGI Symbol;Acc:MGI:2148922]	protein_coding	43.3641	41.3322	42.0816
ENSMUSG00000013822	Elof1	9	-	22112989	22117172	ELF1 homolog, elongation factor 1 [Source:MGI Symbol;Acc:MGI:1913376]	protein_coding	3.9809	3.98265	3.8797
ENSMUSG00000013833	Med16	10	-	79894708	79908923	mediator complex subunit 16 [Source:MGI Symbol;Acc:MGI:2158394]	protein_coding	5.21765	5.48068	5.46805
ENSMUSG00000013846	St3gal1	15	-	67102875	67176830	ST3 beta-galactoside alpha-2,3-sialyltransferase 1 [Source:MGI Symbol;Acc:MGI:98304]	protein_coding	0.785258	0.601717	0.514738
ENSMUSG00000013858	Tmem259	10	-	79974948	79984330	transmembrane protein 259 [Source:MGI Symbol;Acc:MGI:2177957]	protein_coding	5.47347	7.28603	8.38149
ENSMUSG00000013878	Rnf170	8	+	26119368	26151790	ring finger protein 170 [Source:MGI Symbol;Acc:MGI:1924983]	protein_coding	2.68929	2.83492	2.80512
ENSMUSG00000013921	Clip3	7	+	30291728	30308367	CAP-GLY domain containing linker protein 3 [Source:MGI Symbol;Acc:MGI:1923936]	protein_coding	0.505416	0.466204	0.445906
ENSMUSG00000013928	Thap8	7	+	30280094	30290237	THAP domain containing 8 [Source:MGI Symbol;Acc:MGI:1922879]	protein_coding	0.0169936	0.0315658	0.0212338
ENSMUSG00000013936	Myl2	5	+	122100951	122113472	myosin, light polypeptide 2, regulatory, cardiac, slow [Source:MGI Symbol;Acc:MGI:97272]	protein_coding	0.341209	0.335267	0.330206
ENSMUSG00000013973	Dedd	1	+	171329145	171342331	death effector domain-containing [Source:MGI Symbol;Acc:MGI:1333874]	protein_coding	0.310257	0.33384	0.361283
ENSMUSG00000013974	Mcemp1	8	+	3665754	3669259	mast cell expressed membrane protein 1 [Source:MGI Symbol;Acc:MGI:1916439]	protein_coding	416.974	432.764	438.396
ENSMUSG00000013997	Nit1	1	-	171338008	171345646	nitrilase 1 [Source:MGI Symbol;Acc:MGI:1350916]	protein_coding	3.33347	2.86262	2.65592
ENSMUSG00000014030	Pax5	4	-	44524757	44710487	paired box 5 [Source:MGI Symbol;Acc:MGI:97489]	protein_coding	0.0794997	0.0369925	0.0197791
ENSMUSG00000014039	Prdm15	16	-	97791467	97851850	PR domain containing 15 [Source:MGI Symbol;Acc:MGI:1930121]	protein_coding	0.162142	0.179903	0.190437
ENSMUSG00000014074	Rnf168	16	+	32277459	32301434	ring finger protein 168 [Source:MGI Symbol;Acc:MGI:1917488]	protein_coding	2.5683	2.43843	2.40445
ENSMUSG00000014075	Tctex1d2	16	+	32419702	32429099	Tctex1 domain containing 2 [Source:MGI Symbol;Acc:MGI:1913311]	protein_coding	1.40558	1.41102	1.44138
ENSMUSG00000014077	Chp1	2	+	119547697	119587027	calcineurin-like EF hand protein 1 [Source:MGI Symbol;Acc:MGI:1927185]	protein_coding	33.5574	36.506	37.8091
ENSMUSG00000014104	Sval2	6	+	41852989	41864413	seminal vesicle antigen-like 2 [Source:MGI Symbol;Acc:MGI:1934254]	protein_coding	-0.0255634	0.0152774	0.0107917
ENSMUSG00000014158	Trpv4	5	-	114622152	114658421	transient receptor potential cation channel, subfamily V, member 4 [Source:MGI Symbol;Acc:MGI:1926945]	protein_coding	0.0542961	0.04179	0.0310449
ENSMUSG00000014164	Klhl3	13	-	58000228	58113592	kelch-like 3 [Source:MGI Symbol;Acc:MGI:2445185]	protein_coding	0.0945234	0.0985254	0.0916867
ENSMUSG00000014177	Tvp23b	11	+	62879455	62916780	trans-golgi network vesicle protein 23B [Source:MGI Symbol;Acc:MGI:1914760]	protein_coding	2.69656	2.66219	2.73071
ENSMUSG00000014195	Dnajc7	11	-	100582818	100620188	DnaJ heat shock protein family (Hsp40) member C7 [Source:MGI Symbol;Acc:MGI:1928373]	protein_coding	10.1322	10.8895	11.2404
ENSMUSG00000014198	Zfp385c	11	-	100627543	100692455	zinc finger protein 385C [Source:MGI Symbol;Acc:MGI:3608347]	protein_coding	0.03435	0.0261474	0.0366541
ENSMUSG00000014226	Cacybp	1	-	160202367	160212875	calcyclin binding protein [Source:MGI Symbol;Acc:MGI:1270839]	protein_coding	4.19916	3.8769	3.82792
ENSMUSG00000014232	Cluap1	16	+	3908801	3941147	clusterin associated protein 1 [Source:MGI Symbol;Acc:MGI:1924029]	protein_coding	1.15774	1.26306	1.30386
ENSMUSG00000014243	Zswim7	11	-	62267224	62281375	zinc finger SWIM-type containing 7 [Source:MGI Symbol;Acc:MGI:1916997]	protein_coding	0.183569	0.159644	0.173009
ENSMUSG00000014245	Pigl	11	+	62458460	62514417	phosphatidylinositol glycan anchor biosynthesis, class L [Source:MGI Symbol;Acc:MGI:2681271]	protein_coding	0.134452	0.148786	0.144331
ENSMUSG00000014294	Ndufa2	18	-	36742332	36744557	NADH:ubiquinone oxidoreductase subunit A2 [Source:MGI Symbol;Acc:MGI:1343103]	protein_coding	151.677	180.795	196.888
ENSMUSG00000014301	Pam16	16	-	4616464	4624988	presequence translocase-asssociated motor 16 homolog (S. cerevisiae) [Source:MGI Symbol;Acc:MGI:1913699]	protein_coding	9.28715	8.70628	8.55017
ENSMUSG00000014303	Glis2	16	+	4594713	4624924	GLIS family zinc finger 2 [Source:MGI Symbol;Acc:MGI:1932535]	protein_coding	0.103561	0.106127	0.105135
ENSMUSG00000014313	Cox6c	15	-	35925886	35938246	cytochrome c oxidase subunit 6C [Source:MGI Symbol;Acc:MGI:104614]	protein_coding	638.303	567.483	535.906
ENSMUSG00000014329	Bicc1	10	-	70922832	71159700	BicC family RNA binding protein 1 [Source:MGI Symbol;Acc:MGI:1933388]	protein_coding	0.128395	0.108891	0.099452
ENSMUSG00000014349	Ube2z	11	-	96047432	96065388	ubiquitin-conjugating enzyme E2Z [Source:MGI Symbol;Acc:MGI:1343160]	protein_coding	7.32207	7.76511	8.09553
ENSMUSG00000014351	Gip	11	+	96024545	96030831	gastric inhibitory polypeptide [Source:MGI Symbol;Acc:MGI:107504]	protein_coding	0.283987	0.296419	0.302648
ENSMUSG00000014353	Tmem87b	2	+	128818118	128854261	transmembrane protein 87B [Source:MGI Symbol;Acc:MGI:1919727]	protein_coding	1.9878	2.03892	2.01937
ENSMUSG00000014355	Anapc1	2	-	128610104	128687391	anaphase promoting complex subunit 1 [Source:MGI Symbol;Acc:MGI:103097]	protein_coding	1.23075	1.21271	1.20609
ENSMUSG00000014361	Mertk	2	+	128698956	128802894	MER proto-oncogene tyrosine kinase [Source:MGI Symbol;Acc:MGI:96965]	protein_coding	1.08287	1.01521	0.978606
ENSMUSG00000014402	Tsg101	7	-	46888949	46919969	tumor susceptibility gene 101 [Source:MGI Symbol;Acc:MGI:106581]	protein_coding	5.03179	5.19005	5.28779
ENSMUSG00000014418	Hps5	7	-	46760466	46796064	HPS5, biogenesis of lysosomal organelles complex 2 subunit 2 [Source:MGI Symbol;Acc:MGI:2180307]	protein_coding	0.302081	0.447645	0.533463
ENSMUSG00000014426	Map3k4	17	-	12227621	12318796	mitogen-activated protein kinase kinase kinase 4 [Source:MGI Symbol;Acc:MGI:1346875]	protein_coding	3.90706	4.27038	4.52718
ENSMUSG00000014444	Piezo1	8	-	122481698	122551329	piezo-type mechanosensitive ion channel component 1 [Source:MGI Symbol;Acc:MGI:3603204]	protein_coding	0.404985	0.450851	0.440712
ENSMUSG00000014453	Blk	14	-	63372836	63417037	B lymphoid kinase [Source:MGI Symbol;Acc:MGI:88169]	protein_coding	0.299132	0.240306	0.222288
ENSMUSG00000014470	Rnf166	8	-	122466147	122476064	ring finger protein 166 [Source:MGI Symbol;Acc:MGI:1915968]	protein_coding	7.50616	8.5214	9.06192
ENSMUSG00000014496	Ankrd28	14	-	31698768	31830651	ankyrin repeat domain 28 [Source:MGI Symbol;Acc:MGI:2145661]	protein_coding	15.3106	15.6341	15.8916
ENSMUSG00000014498	Ankrd52	10	+	128377115	128408704	ankyrin repeat domain 52 [Source:MGI Symbol;Acc:MGI:2444029]	protein_coding	4.57003	4.44416	4.34254
ENSMUSG00000014503	Pkd2l2	18	+	34408489	34444116	polycystic kidney disease 2-like 2 [Source:MGI Symbol;Acc:MGI:1858231]	protein_coding	2.02276	1.79964	1.8178
ENSMUSG00000014504	Srp19	18	+	34330847	34336599	signal recognition particle 19 [Source:MGI Symbol;Acc:MGI:1913634]	protein_coding	63.5028	70.1423	72.2962
ENSMUSG00000014529	Tmbim7	5	+	3651181	3680325	transmembrane BAX inhibitor motif containing 7 [Source:MGI Symbol;Acc:MGI:1922305]	protein_coding	0.0679108	0.0534915	0.0616272
ENSMUSG00000014542	Clec4f	6	-	83644542	83656187	C-type lectin domain family 4, member f [Source:MGI Symbol;Acc:MGI:1859834]	protein_coding	0.0115625	0.0178928	0.0243087
ENSMUSG00000014543	Klra17	6	-	129831154	129876672	killer cell lectin-like receptor, subfamily A, member 17 [Source:MGI Symbol;Acc:MGI:2180674]	protein_coding	0.0643814	0.0120496	0.0196696
ENSMUSG00000014547	Wdfy2	14	+	62837678	62961509	WD repeat and FYVE domain containing 2 [Source:MGI Symbol;Acc:MGI:2442811]	protein_coding	5.99918	5.54624	5.44762
ENSMUSG00000014550	Rbsn	6	-	92186712	92214925	rabenosyn, RAB effector [Source:MGI Symbol;Acc:MGI:1925537]	protein_coding	1.43368	1.37947	1.37884
ENSMUSG00000014551	Mrps25	6	-	92169525	92184033	mitochondrial ribosomal protein S25 [Source:MGI Symbol;Acc:MGI:1928140]	protein_coding	4.48447	4.70355	4.70115
ENSMUSG00000014554	Dguok	6	-	83480217	83506969	deoxyguanosine kinase [Source:MGI Symbol;Acc:MGI:1351602]	protein_coding	21.3322	23.8755	25.2024
ENSMUSG00000014592	Camta1	4	-	150917322	151861876	calmodulin binding transcription activator 1 [Source:MGI Symbol;Acc:MGI:2140230]	protein_coding	0.226987	0.314305	0.371809
ENSMUSG00000014599	Csf1	3	-	107741048	107760469	colony stimulating factor 1 (macrophage) [Source:MGI Symbol;Acc:MGI:1339753]	protein_coding	0.842741	0.755687	0.741329
ENSMUSG00000014601	Strip1	3	-	107612532	107631694	striatin interacting protein 1 [Source:MGI Symbol;Acc:MGI:2443884]	protein_coding	3.04863	3.24719	3.28119
ENSMUSG00000014602	Kif1a	1	-	93015464	93101951	kinesin family member 1A [Source:MGI Symbol;Acc:MGI:108391]	protein_coding	0.50421	0.461647	0.43355
ENSMUSG00000014603	Alx3	3	+	107595031	107605776	aristaless-like homeobox 3 [Source:MGI Symbol;Acc:MGI:1277097]	protein_coding	0.00234823	-5.54665e-05	-0.00228739
ENSMUSG00000014606	Slc25a11	11	-	70644196	70647479	solute carrier family 25 (mitochondrial carrier oxoglutarate carrier), member 11 [Source:MGI Symbol;Acc:MGI:1915113]	protein_coding	13.7186	14.5668	15.1667
ENSMUSG00000014609	Chrne	11	-	70614883	70619216	cholinergic receptor, nicotinic, epsilon polypeptide [Source:MGI Symbol;Acc:MGI:87894]	protein_coding	0.0176608	0.0357937	0.0441011
ENSMUSG00000014633	Cmc2	8	-	116888685	116921455	COX assembly mitochondrial protein 2 [Source:MGI Symbol;Acc:MGI:1913781]	protein_coding	232.854	271.654	291.921
ENSMUSG00000014668	Chfr	5	+	110135842	110171972	checkpoint with forkhead and ring finger domains [Source:MGI Symbol;Acc:MGI:2444898]	protein_coding	11.3984	11.2262	11.0261
ENSMUSG00000014686	Ceacam16	7	-	19852097	19861299	carcinoembryonic antigen-related cell adhesion molecule 16 [Source:MGI Symbol;Acc:MGI:2685615]	protein_coding	0.460493	0.464552	0.464141
ENSMUSG00000014704	Hoxa2	6	-	52162417	52164831	homeobox A2 [Source:MGI Symbol;Acc:MGI:96174]	protein_coding	0.0810808	0.0688136	0.0591276
ENSMUSG00000014725	Adam28	14	-	68606027	68655842	a disintegrin and metallopeptidase domain 28 [Source:MGI Symbol;Acc:MGI:105988]	protein_coding	0.103313	0.0908074	0.11036
ENSMUSG00000014747	Ankrd53	6	+	83762644	83768326	ankyrin repeat domain 53 [Source:MGI Symbol;Acc:MGI:1922555]	protein_coding	0.0834155	0.0784533	0.0742725
ENSMUSG00000014748	Tex261	6	-	83768885	83775813	testis expressed gene 261 [Source:MGI Symbol;Acc:MGI:1096575]	protein_coding	6.11151	6.31713	6.32876
ENSMUSG00000014763	Fam120b	17	+	15396202	15433583	family with sequence similarity 120, member B [Source:MGI Symbol;Acc:MGI:1914794]	protein_coding	2.09123	2.13636	2.08275
ENSMUSG00000014767	Tbp	17	+	15499888	15528379	TATA box binding protein [Source:MGI Symbol;Acc:MGI:101838]	protein_coding	1.01334	1.13695	1.16344
ENSMUSG00000014769	Psmb1	17	-	15475021	15499751	proteasome (prosome, macropain) subunit, beta type 1 [Source:MGI Symbol;Acc:MGI:104884]	protein_coding	133.029	138.818	143.385
ENSMUSG00000014771	Pdcd2	17	-	15519208	15527301	programmed cell death 2 [Source:MGI Symbol;Acc:MGI:104643]	protein_coding	56.1538	54.3503	56.3098
ENSMUSG00000014773	Dll1	17	-	15367354	15376872	delta like canonical Notch ligand 1 [Source:MGI Symbol;Acc:MGI:104659]	protein_coding	0.353426	0.304537	0.271443
ENSMUSG00000014776	Nol3	8	+	105276140	105281939	nucleolar protein 3 (apoptosis repressor with CARD domain) [Source:MGI Symbol;Acc:MGI:1925938]	protein_coding	0.0716848	0.0950792	0.101914
ENSMUSG00000014778	Fhod1	8	-	105329163	105347953	formin homology 2 domain containing 1 [Source:MGI Symbol;Acc:MGI:2679008]	protein_coding	7.76461	6.92094	6.59287
ENSMUSG00000014782	Plekhg4	8	+	105373274	105382862	pleckstrin homology domain containing, family G (with RhoGef domain) member 4 [Source:MGI Symbol;Acc:MGI:2142544]	protein_coding	0.196959	0.193637	0.19938
ENSMUSG00000014786	Slc9a5	8	+	105348843	105369881	solute carrier family 9 (sodium/hydrogen exchanger), member 5 [Source:MGI Symbol;Acc:MGI:2685542]	protein_coding	0.0368408	0.0576821	0.0549717
ENSMUSG00000014791	Elmo3	8	+	105305601	105310760	engulfment and cell motility 3 [Source:MGI Symbol;Acc:MGI:2679007]	protein_coding	0.377631	0.320735	0.333568
ENSMUSG00000014813	Stc1	14	+	69029238	69041804	stanniocalcin 1 [Source:MGI Symbol;Acc:MGI:109131]	protein_coding	0.0264468	0.0242006	0.0315913
ENSMUSG00000014837	4931428F04Rik	8	-	105280409	105289864	RIKEN cDNA 4931428F04 gene [Source:MGI Symbol;Acc:MGI:1921606]	protein_coding	0.0155559	0.0471745	0.0623902
ENSMUSG00000014846	Tppp3	8	-	105467493	105471526	tubulin polymerization-promoting protein family member 3 [Source:MGI Symbol;Acc:MGI:1915221]	protein_coding	0.965689	1.1265	1.11675
ENSMUSG00000014850	Msh3	13	-	92211872	92355003	mutS homolog 3 [Source:MGI Symbol;Acc:MGI:109519]	protein_coding	0.969208	0.786671	0.682971
ENSMUSG00000014852	Adamts13	2	+	26973416	27009628	a disintegrin-like and metallopeptidase (reprolysin type) with thrombospondin type 1 motif, 13 [Source:MGI Symbol;Acc:MGI:2685556]	protein_coding	0.0329695	0.0324776	0.0314689
ENSMUSG00000014856	Tmem208	8	+	105326354	105335219	transmembrane protein 208 [Source:MGI Symbol;Acc:MGI:1913570]	protein_coding	2.62275	2.12865	1.91501
ENSMUSG00000014859	E2f4	8	+	105297663	105305370	E2F transcription factor 4 [Source:MGI Symbol;Acc:MGI:103012]	protein_coding	21.3363	20.4246	19.8761
ENSMUSG00000014867	Surf4	2	-	26920040	26933928	surfeit gene 4 [Source:MGI Symbol;Acc:MGI:98445]	protein_coding	122.836	109.074	102.59
ENSMUSG00000014873	Surf2	2	+	26916367	26920183	surfeit gene 2 [Source:MGI Symbol;Acc:MGI:98444]	protein_coding	1.63411	1.46385	1.44248
ENSMUSG00000014905	Dnajb9	12	-	44205559	44210326	DnaJ heat shock protein family (Hsp40) member B9 [Source:MGI Symbol;Acc:MGI:1351618]	protein_coding	8.84973	8.96671	9.0097
ENSMUSG00000014907	Naf1	8	+	66860217	66890564	nuclear assembly factor 1 ribonucleoprotein [Source:MGI Symbol;Acc:MGI:2682306]	protein_coding	0.1413	0.159552	0.157576
ENSMUSG00000014932	Yes1	5	+	32611171	32687057	YES proto-oncogene 1, Src family tyrosine kinase [Source:MGI Symbol;Acc:MGI:99147]	protein_coding	0.339866	0.306549	0.331494
ENSMUSG00000014956	Ppp1cb	5	+	32458843	32517433	protein phosphatase 1 catalytic subunit beta [Source:MGI Symbol;Acc:MGI:104871]	protein_coding	9.68604	9.70864	9.91812
ENSMUSG00000014959	Gorasp2	2	+	70661576	70712636	golgi reassembly stacking protein 2 [Source:MGI Symbol;Acc:MGI:2135962]	protein_coding	30.1899	31.8525	32.7001
ENSMUSG00000014980	Tsen15	1	-	152370735	152386688	tRNA splicing endonuclease subunit 15 [Source:MGI Symbol;Acc:MGI:1913887]	protein_coding	4.67209	5.0922	5.20164
ENSMUSG00000015001	Oc90	15	-	65876053	65912397	otoconin 90 [Source:MGI Symbol;Acc:MGI:1313269]	protein_coding	0.0407048	0.0207023	0.0154495
ENSMUSG00000015002	Efr3a	15	+	65787034	65873816	EFR3 homolog A [Source:MGI Symbol;Acc:MGI:1923990]	protein_coding	14.2248	15.8457	16.6412
ENSMUSG00000015013	Trappc2l	8	+	122611640	122616660	trafficking protein particle complex 2-like [Source:MGI Symbol;Acc:MGI:1916295]	protein_coding	24.0928	23.4109	22.628
ENSMUSG00000015016	Acsf3	8	+	122775486	122817880	acyl-CoA synthetase family member 3 [Source:MGI Symbol;Acc:MGI:2182591]	protein_coding	0.178421	0.17428	0.165771
ENSMUSG00000015023	Ddx19a	8	-	110974996	110997800	DEAD (Asp-Glu-Ala-Asp) box polypeptide 19a [Source:MGI Symbol;Acc:MGI:99526]	protein_coding	0.488227	0.529591	0.528756
ENSMUSG00000015027	Galns	8	-	122578242	122611463	galactosamine (N-acetyl)-6-sulfate sulfatase [Source:MGI Symbol;Acc:MGI:1355303]	protein_coding	27.5764	27.8789	28.3669
ENSMUSG00000015053	Gata2	6	+	88193891	88207032	GATA binding protein 2 [Source:MGI Symbol;Acc:MGI:95662]	protein_coding	1.89198	1.7671	1.72319
ENSMUSG00000015083	C8g	2	-	25498651	25501719	complement component 8, gamma polypeptide [Source:MGI Symbol;Acc:MGI:88237]	protein_coding	0.175386	0.226454	0.210809
ENSMUSG00000015085	Entpd2	2	+	25395874	25401321	ectonucleoside triphosphate diphosphohydrolase 2 [Source:MGI Symbol;Acc:MGI:1096863]	protein_coding	0.474624	0.449157	0.435445
ENSMUSG00000015087	Rabl6	2	-	25583018	25608521	RAB, member RAS oncogene family-like 6 [Source:MGI Symbol;Acc:MGI:2442633]	protein_coding	3.95624	3.58935	3.41387
ENSMUSG00000015090	Ptgds	2	-	25466709	25470046	prostaglandin D2 synthase (brain) [Source:MGI Symbol;Acc:MGI:99261]	protein_coding	1.23803	1.19099	1.16326
ENSMUSG00000015092	Edf1	2	+	25557847	25562082	endothelial differentiation-related factor 1 [Source:MGI Symbol;Acc:MGI:1891227]	protein_coding	125.649	108.212	100.688
ENSMUSG00000015093	Clic3	2	+	25456838	25458776	chloride intracellular channel 3 [Source:MGI Symbol;Acc:MGI:1916704]	protein_coding	0.0955347	0.124184	0.136358
ENSMUSG00000015094	Npdc1	2	+	25399351	25409494	neural proliferation, differentiation and control 1 [Source:MGI Symbol;Acc:MGI:1099802]	protein_coding	1.83167	1.5067	1.3773
ENSMUSG00000015095	Fbxw5	2	+	25500750	25505471	F-box and WD-40 domain protein 5 [Source:MGI Symbol;Acc:MGI:1354731]	protein_coding	0.799069	0.753998	0.712325
ENSMUSG00000015112	Slc25a13	6	-	6041218	6217173	solute carrier family 25 (mitochondrial carrier, adenine nucleotide translocator), member 13 [Source:MGI Symbol;Acc:MGI:1354721]	protein_coding	0.957713	1.02343	1.03861
ENSMUSG00000015120	Ube2i	17	-	25261916	25274622	ubiquitin-conjugating enzyme E2I [Source:MGI Symbol;Acc:MGI:107365]	protein_coding	54.0451	61.9164	65.3258
ENSMUSG00000015126	Tsr3	17	+	25240170	25242798	TSR3 20S rRNA accumulation [Source:MGI Symbol;Acc:MGI:1915577]	protein_coding	0.183297	0.267937	0.318145
ENSMUSG00000015127	Unkl	17	+	25188397	25234443	unkempt family like zinc finger [Source:MGI Symbol;Acc:MGI:1921404]	protein_coding	0.17193	0.165971	0.146117
ENSMUSG00000015133	Lrrk1	7	-	66226912	66388350	leucine-rich repeat kinase 1 [Source:MGI Symbol;Acc:MGI:2142227]	protein_coding	3.54264	3.74272	3.69163
ENSMUSG00000015134	Aldh1a3	7	-	66390890	66427517	aldehyde dehydrogenase family 1, subfamily A3 [Source:MGI Symbol;Acc:MGI:1861722]	protein_coding	0.0785738	0.0765973	0.0619395
ENSMUSG00000015143	Actn1	12	-	80167547	80260371	actinin, alpha 1 [Source:MGI Symbol;Acc:MGI:2137706]	protein_coding	12.3977	12.5845	12.7074
ENSMUSG00000015149	Sirt2	7	+	28766735	28788661	sirtuin 2 [Source:MGI Symbol;Acc:MGI:1927664]	protein_coding	1.06842	1.13722	1.15531
ENSMUSG00000015165	Hnrnpl	7	+	28808541	28822266	heterogeneous nuclear ribonucleoprotein L [Source:MGI Symbol;Acc:MGI:104816]	protein_coding	52.0006	49.521	49.7394
ENSMUSG00000015176	Nolc1	19	+	46075863	46085530	nucleolar and coiled-body phosphoprotein 1 [Source:MGI Symbol;Acc:MGI:1918019]	protein_coding	5.63845	5.6147	5.59101
ENSMUSG00000015189	Casd1	6	+	4600839	4643355	CAS1 domain containing 1 [Source:MGI Symbol;Acc:MGI:2384865]	protein_coding	1.07469	1.09766	1.08054
ENSMUSG00000015202	Cnksr3	10	-	7119063	7212237	Cnksr family member 3 [Source:MGI Symbol;Acc:MGI:2674130]	protein_coding	0.258735	0.227996	0.215399
ENSMUSG00000015214	Mtmr1	X	+	71364760	71419196	myotubularin related protein 1 [Source:MGI Symbol;Acc:MGI:1858271]	protein_coding	1.34679	1.16507	1.02453
ENSMUSG00000015217	Hmgb3	X	+	71555918	71560676	high mobility group box 3 [Source:MGI Symbol;Acc:MGI:1098219]	protein_coding	7.16957	6.43364	5.98821
ENSMUSG00000015222	Map2	1	+	66175273	66442583	microtubule-associated protein 2 [Source:MGI Symbol;Acc:MGI:97175]	protein_coding	0.689404	0.630013	0.603671
ENSMUSG00000015224	Cyp2j9	4	-	96568429	96591578	cytochrome P450, family 2, subfamily j, polypeptide 9 [Source:MGI Symbol;Acc:MGI:1921769]	protein_coding	0.287947	0.273365	0.291268
ENSMUSG00000015242	Nipsnap3a	4	+	52989272	53001162	nipsnap homolog 3A [Source:MGI Symbol;Acc:MGI:1920648]	protein_coding	0.101973	0.037309	0.0340392
ENSMUSG00000015243	Abca1	4	-	53030787	53159895	ATP-binding cassette, sub-family A (ABC1), member 1 [Source:MGI Symbol;Acc:MGI:99607]	protein_coding	1.05171	1.07747	1.09163
ENSMUSG00000015247	Nipsnap3b	4	+	53011880	53022060	nipsnap homolog 3B [Source:MGI Symbol;Acc:MGI:1913786]	protein_coding	22.4528	24.3549	25.1459
ENSMUSG00000015289	Lage3	X	-	74351276	74353618	L antigen family, member 3 [Source:MGI Symbol;Acc:MGI:1913442]	protein_coding	6.59841	6.47435	6.08911
ENSMUSG00000015290	Ubl4a	X	-	74365718	74373218	ubiquitin-like 4A [Source:MGI Symbol;Acc:MGI:95049]	protein_coding	9.21161	10.5934	11.3356
ENSMUSG00000015291	Gdi1	X	+	74304998	74311862	guanosine diphosphate (GDP) dissociation inhibitor 1 [Source:MGI Symbol;Acc:MGI:99846]	protein_coding	12.9521	12.384	11.901
ENSMUSG00000015305	Sash1	10	-	8722219	8886070	SAM and SH3 domain containing 1 [Source:MGI Symbol;Acc:MGI:1917347]	protein_coding	0.299823	0.212794	0.18949
ENSMUSG00000015312	Gadd45b	10	+	80930073	80932204	growth arrest and DNA-damage-inducible 45 beta [Source:MGI Symbol;Acc:MGI:107776]	protein_coding	66.7212	70.6976	72.5162
ENSMUSG00000015314	Slamf6	1	+	171917515	171953170	SLAM family member 6 [Source:MGI Symbol;Acc:MGI:1353620]	protein_coding	0.246633	0.18259	0.162926
ENSMUSG00000015316	Slamf1	1	+	171767127	171801184	signaling lymphocytic activation molecule family member 1 [Source:MGI Symbol;Acc:MGI:1351314]	protein_coding	-0.103531	0.118511	0.244235
ENSMUSG00000015335	Zdhhc12	2	-	30090944	30093648	zinc finger, DHHC domain containing 12 [Source:MGI Symbol;Acc:MGI:1913470]	protein_coding	0.991043	0.943016	0.880607
ENSMUSG00000015337	Endog	2	+	30171493	30174069	endonuclease G [Source:MGI Symbol;Acc:MGI:1261433]	protein_coding	1.44661	1.5872	1.56887
ENSMUSG00000015340	Cybb	X	-	9435252	9487771	cytochrome b-245, beta polypeptide [Source:MGI Symbol;Acc:MGI:88574]	protein_coding	179.823	172.891	169.782
ENSMUSG00000015341	Golga7	8	-	23241346	23257074	golgi autoantigen, golgin subfamily a, 7 [Source:MGI Symbol;Acc:MGI:1931029]	protein_coding	16.0917	16.7282	17.4967
ENSMUSG00000015342	Xk	X	+	9272756	9313250	X-linked Kx blood group [Source:MGI Symbol;Acc:MGI:103569]	protein_coding	0.205173	0.228489	0.237675
ENSMUSG00000015354	Pcolce2	9	+	95637601	95698096	procollagen C-endopeptidase enhancer 2 [Source:MGI Symbol;Acc:MGI:1923727]	protein_coding	0.100593	0.0501877	0.0620997
ENSMUSG00000015355	Cd48	1	+	171682009	171705258	CD48 antigen [Source:MGI Symbol;Acc:MGI:88339]	protein_coding	0.253834	0.245144	0.235821
ENSMUSG00000015357	Clpx	9	+	65294260	65330658	caseinolytic mitochondrial matrix peptidase chaperone subunit [Source:MGI Symbol;Acc:MGI:1346017]	protein_coding	0.978603	0.77282	0.667645
ENSMUSG00000015363	Trabd	15	+	89075124	89087077	TraB domain containing [Source:MGI Symbol;Acc:MGI:1915226]	protein_coding	13.1337	13.0303	12.978
ENSMUSG00000015365	Mov10l1	15	+	88982909	89055152	Mov10 like RISC complex RNA helicase 1 [Source:MGI Symbol;Acc:MGI:1891384]	protein_coding	0.0498834	0.0421679	0.0400625
ENSMUSG00000015377	Dennd6b	15	-	89182213	89196496	DENN/MADD domain containing 6B [Source:MGI Symbol;Acc:MGI:1916690]	protein_coding	0.0765074	0.0668083	0.0561778
ENSMUSG00000015396	Cd83	13	+	43784775	43803132	CD83 antigen [Source:MGI Symbol;Acc:MGI:1328316]	protein_coding	0.163205	0.227658	0.258633
ENSMUSG00000015401	Cltrn	X	+	164088830	164118860	collectrin, amino acid transport regulator [Source:MGI Symbol;Acc:MGI:1926234]	protein_coding	0.274903	0.242784	0.232764
ENSMUSG00000015405	Ace2	X	+	164139332	164188420	angiotensin I converting enzyme (peptidyl-dipeptidase A) 2 [Source:MGI Symbol;Acc:MGI:1917258]	protein_coding	3.10267	3.18582	3.2013
ENSMUSG00000015437	Gzmb	14	-	56258838	56262260	granzyme B [Source:MGI Symbol;Acc:MGI:109267]	protein_coding	0.601996	0.55806	0.553187
ENSMUSG00000015441	Gzmf	14	-	56205263	56211417	granzyme F [Source:MGI Symbol;Acc:MGI:109254]	protein_coding	-0.0204337	0.00447907	0.0163079
ENSMUSG00000015443	Gzmn	14	-	56165797	56174599	granzyme N [Source:MGI Symbol;Acc:MGI:2675494]	protein_coding	-0.014331	0.00304386	0.0114607
ENSMUSG00000015451	C4a	17	-	34809092	34823464	complement component 4A (Rodgers blood group) [Source:MGI Symbol;Acc:MGI:98320]	processed_transcript	0.0582164	0.0271854	0.0205599
ENSMUSG00000015452	Ager	17	+	34597862	34600936	advanced glycosylation end product-specific receptor [Source:MGI Symbol;Acc:MGI:893592]	protein_coding	-0.0494361	0.0241429	0.0272074
ENSMUSG00000015461	Atf6b	17	+	34647146	34655074	activating transcription factor 6 beta [Source:MGI Symbol;Acc:MGI:105121]	protein_coding	1.74863	1.75404	1.77559
ENSMUSG00000015467	Egfl8	17	-	34613349	34615971	EGF-like domain 8 [Source:MGI Symbol;Acc:MGI:1932094]	protein_coding	0.279307	0.29942	0.269388
ENSMUSG00000015468	Notch4	17	+	34564268	34588503	notch 4 [Source:MGI Symbol;Acc:MGI:107471]	protein_coding	0.0355583	0.0785726	0.086385
ENSMUSG00000015474	Ppt2	17	-	34616662	34628510	palmitoyl-protein thioesterase 2 [Source:MGI Symbol;Acc:MGI:1860075]	protein_coding	7.0106	6.57716	6.54423
ENSMUSG00000015476	Prrt1	17	+	34629533	34633126	proline-rich transmembrane protein 1 [Source:MGI Symbol;Acc:MGI:1932118]	protein_coding	0.500471	0.394245	0.352852
ENSMUSG00000015478	Rnf5	17	-	34601091	34603690	ring finger protein 5 [Source:MGI Symbol;Acc:MGI:1860076]	protein_coding	1.08143	1.21106	1.25652
ENSMUSG00000015484	Fam163a	1	-	156075966	156205026	family with sequence similarity 163, member A [Source:MGI Symbol;Acc:MGI:3618859]	protein_coding	0.0727221	0.071585	0.0694993
ENSMUSG00000015488	Cacfd1	2	+	27009926	27021089	calcium channel flower domain containing 1 [Source:MGI Symbol;Acc:MGI:1924317]	protein_coding	0.697284	0.7124	0.740949
ENSMUSG00000015501	Hivep2	10	+	13966075	14151374	human immunodeficiency virus type I enhancer binding protein 2 [Source:MGI Symbol;Acc:MGI:1338076]	protein_coding	0.129902	0.200659	0.257457
ENSMUSG00000015519	2310057J18Rik	10	-	28972288	28986303	RIKEN cDNA 2310057J18 gene [Source:MGI Symbol;Acc:MGI:1914969]	protein_coding	0.00584981	-0.000322439	-0.00549512
ENSMUSG00000015522	Arnt	3	+	95434388	95497240	aryl hydrocarbon receptor nuclear translocator [Source:MGI Symbol;Acc:MGI:88071]	protein_coding	3.7362	3.73101	3.67257
ENSMUSG00000015533	Itga2	13	-	114833081	114932100	integrin alpha 2 [Source:MGI Symbol;Acc:MGI:96600]	protein_coding	0.0405743	0.0732028	0.0998738
ENSMUSG00000015536	Mocs2	13	+	114818236	114832275	molybdenum cofactor synthesis 2 [Source:MGI Symbol;Acc:MGI:1336894]	protein_coding	4.16082	4.04466	4.10452
ENSMUSG00000015542	Nat9	11	-	115182832	115187859	N-acetyltransferase 9 (GCN5-related, putative) [Source:MGI Symbol;Acc:MGI:1913426]	protein_coding	6.58443	6.29186	6.20527
ENSMUSG00000015568	Lpl	8	+	68880491	68907448	lipoprotein lipase [Source:MGI Symbol;Acc:MGI:96820]	protein_coding	9.57105	8.42394	7.89343
ENSMUSG00000015575	Atp6v0e	17	+	26663231	26699647	ATPase, H+ transporting, lysosomal V0 subunit E [Source:MGI Symbol;Acc:MGI:1328318]	protein_coding	302.185	319.269	326.574
ENSMUSG00000015579	Nkx2-5	17	-	26838664	26845009	NK2 homeobox 5 [Source:MGI Symbol;Acc:MGI:97350]	protein_coding	0.0710794	0.0669049	0.0644505
ENSMUSG00000015597	Zfp318	17	+	46383731	46420920	zinc finger protein 318 [Source:MGI Symbol;Acc:MGI:1889348]	protein_coding	0.138352	0.136182	0.119555
ENSMUSG00000015599	Ttbk1	17	-	46442448	46487675	tau tubulin kinase 1 [Source:MGI Symbol;Acc:MGI:2147036]	protein_coding	0.11319	0.109051	0.107573
ENSMUSG00000015605	Srf	17	-	46548329	46556175	serum response factor [Source:MGI Symbol;Acc:MGI:106658]	protein_coding	12.6182	13.9758	14.4085
ENSMUSG00000015619	Gata3	2	-	9857078	9890034	GATA binding protein 3 [Source:MGI Symbol;Acc:MGI:95663]	protein_coding	0.450528	0.316187	0.298114
ENSMUSG00000015627	Gata5	2	-	180325133	180334699	GATA binding protein 5 [Source:MGI Symbol;Acc:MGI:109497]	protein_coding	0.358915	0.356116	0.351671
ENSMUSG00000015647	Lama5	2	-	180176373	180225859	laminin, alpha 5 [Source:MGI Symbol;Acc:MGI:105382]	protein_coding	0.0936359	0.10837	0.114415
ENSMUSG00000015652	Steap1	5	-	5736317	5749326	six transmembrane epithelial antigen of the prostate 1 [Source:MGI Symbol;Acc:MGI:1917608]	protein_coding	0.141593	0.110998	0.103245
ENSMUSG00000015653	Steap2	5	-	5664829	5694578	six transmembrane epithelial antigen of prostate 2 [Source:MGI Symbol;Acc:MGI:1921301]	protein_coding	0.358268	0.287668	0.279278
ENSMUSG00000015656	Hspa8	9	+	40800984	40810087	heat shock protein 8 [Source:MGI Symbol;Acc:MGI:105384]	protein_coding	92.7665	93.3338	94.3958
ENSMUSG00000015659	Serac1	17	-	6042196	6079741	serine active site containing 1 [Source:MGI Symbol;Acc:MGI:2447813]	protein_coding	0.0936796	0.0671935	0.0632413
ENSMUSG00000015665	Awat1	X	+	100572251	100578205	acyl-CoA wax alcohol acyltransferase 1 [Source:MGI Symbol;Acc:MGI:3588200]	protein_coding	0.0192288	0.044405	0.0603045
ENSMUSG00000015668	Pdzd11	X	-	100622883	100626568	PDZ domain containing 11 [Source:MGI Symbol;Acc:MGI:1919871]	protein_coding	5.20537	5.52965	5.69147
ENSMUSG00000015671	Psma2	13	+	14613240	14674236	proteasome subunit alpha 2 [Source:MGI Symbol;Acc:MGI:104885]	protein_coding	96.3519	106.674	110.56
ENSMUSG00000015672	Mrpl32	13	-	14608184	14613165	mitochondrial ribosomal protein L32 [Source:MGI Symbol;Acc:MGI:2137226]	protein_coding	9.04044	10.0996	10.8392
ENSMUSG00000015697	Setdb1	3	-	95323525	95357202	SET domain, bifurcated 1 [Source:MGI Symbol;Acc:MGI:1934229]	protein_coding	2.02395	2.00913	1.97661
ENSMUSG00000015702	Anxa9	3	-	95296096	95307176	annexin A9 [Source:MGI Symbol;Acc:MGI:1923711]	protein_coding	2.99842	3.03317	3.00346
ENSMUSG00000015709	Arnt2	7	-	84246278	84410176	aryl hydrocarbon receptor nuclear translocator 2 [Source:MGI Symbol;Acc:MGI:107188]	protein_coding	0.237283	0.236205	0.241251
ENSMUSG00000015711	Prune1	3	-	95253674	95282076	prune exopolyphosphatase [Source:MGI Symbol;Acc:MGI:1925152]	protein_coding	2.83109	2.6362	2.53984
ENSMUSG00000015714	Cers2	3	+	95314791	95323599	ceramide synthase 2 [Source:MGI Symbol;Acc:MGI:1924143]	protein_coding	5.08855	5.2959	5.35896
ENSMUSG00000015721	Nlrp5	7	+	23385889	23441922	NLR family, pyrin domain containing 5 [Source:MGI Symbol;Acc:MGI:1345193]	protein_coding	0.306553	0.345839	0.372631
ENSMUSG00000015733	Capza2	6	+	17636234	17666972	capping protein (actin filament) muscle Z-line, alpha 2 [Source:MGI Symbol;Acc:MGI:106222]	protein_coding	65.575	62.3992	60.4998
ENSMUSG00000015745	Plekho1	3	-	95988429	95996001	pleckstrin homology domain containing, family O member 1 [Source:MGI Symbol;Acc:MGI:1914470]	protein_coding	0.97688	0.823331	0.791084
ENSMUSG00000015747	Vps45	3	-	95999832	96058466	vacuolar protein sorting 45 [Source:MGI Symbol;Acc:MGI:891965]	protein_coding	0.928	0.911741	0.957477
ENSMUSG00000015748	Prpf3	3	-	95830124	95855885	pre-mRNA processing factor 3 [Source:MGI Symbol;Acc:MGI:1918017]	protein_coding	3.22798	3.53918	3.52531
ENSMUSG00000015749	Anp32e	3	+	95929246	95947390	acidic (leucine-rich) nuclear phosphoprotein 32 family, member E [Source:MGI Symbol;Acc:MGI:1913721]	protein_coding	21.734	21.6605	21.4989
ENSMUSG00000015750	Aph1a	3	+	95893969	95898288	aph1 homolog A, gamma secretase subunit [Source:MGI Symbol;Acc:MGI:2385110]	protein_coding	0.619158	0.706463	0.737288
ENSMUSG00000015755	Tab2	10	-	7905653	7956230	TGF-beta activated kinase 1/MAP3K7 binding protein 2 [Source:MGI Symbol;Acc:MGI:1915902]	protein_coding	32.4991	26.9271	24.3268
ENSMUSG00000015757	Ppil4	10	+	7792891	7823135	peptidylprolyl isomerase (cyclophilin)-like 4 [Source:MGI Symbol;Acc:MGI:1914668]	protein_coding	2.4377	3.16562	3.58257
ENSMUSG00000015759	Cnih1	14	-	46775567	46788411	cornichon family AMPA receptor auxiliary protein 1 [Source:MGI Symbol;Acc:MGI:1277202]	protein_coding	14.9878	16.553	17.2915
ENSMUSG00000015766	Eps8	6	-	137477245	137654876	epidermal growth factor receptor pathway substrate 8 [Source:MGI Symbol;Acc:MGI:104684]	protein_coding	1.74894	1.59712	1.57675
ENSMUSG00000015776	Med22	2	-	26905262	26910677	mediator complex subunit 22 [Source:MGI Symbol;Acc:MGI:98446]	protein_coding	0.998841	1.08692	1.10626
ENSMUSG00000015787	Abo	2	-	26842503	26864979	ABO blood group (transferase A, alpha 1-3-N-acetylgalactosaminyltransferase, transferase B, alpha 1-3-galactosyltransferase) [Source:MGI Symbol;Acc:MGI:2135738]	protein_coding	0.040116	0.0309659	0.0269721
ENSMUSG00000015790	Surf1	2	-	26913381	26916530	surfeit gene 1 [Source:MGI Symbol;Acc:MGI:98443]	protein_coding	4.87491	6.57214	6.96626
ENSMUSG00000015804	Med28	5	+	45520229	45529276	mediator complex subunit 28 [Source:MGI Symbol;Acc:MGI:1914249]	protein_coding	10.8547	12.732	13.7069
ENSMUSG00000015806	Qdpr	5	-	45434021	45450236	quinoid dihydropteridine reductase [Source:MGI Symbol;Acc:MGI:97836]	protein_coding	9.03128	9.14724	9.45745
ENSMUSG00000015812	Gnrh1	14	+	67745181	67749439	gonadotropin releasing hormone 1 [Source:MGI Symbol;Acc:MGI:95789]	protein_coding	0.518766	0.483363	0.519361
ENSMUSG00000015829	Tnr	1	+	159523769	159931729	tenascin R [Source:MGI Symbol;Acc:MGI:99516]	protein_coding	0.867308	0.797027	0.752816
ENSMUSG00000015837	Sqstm1	11	-	50199366	50210827	sequestosome 1 [Source:MGI Symbol;Acc:MGI:107931]	protein_coding	14.9886	15.0154	15.2325
ENSMUSG00000015839	Nfe2l2	2	-	75675513	75704641	nuclear factor, erythroid derived 2, like 2 [Source:MGI Symbol;Acc:MGI:108420]	protein_coding	30.8294	32.8636	33.7546
ENSMUSG00000015843	Rxrg	1	+	167598384	167639623	retinoid X receptor gamma [Source:MGI Symbol;Acc:MGI:98216]	protein_coding	0.084689	0.0935366	0.0924137
ENSMUSG00000015846	Rxra	2	+	27676440	27762957	retinoid X receptor alpha [Source:MGI Symbol;Acc:MGI:98214]	protein_coding	2.14643	2.035	2.02668
ENSMUSG00000015850	Adamtsl4	3	-	95676201	95687917	ADAMTS-like 4 [Source:MGI Symbol;Acc:MGI:2389008]	protein_coding	0.192178	0.200916	0.192018
ENSMUSG00000015852	Fcrls	3	-	87250758	87263738	Fc receptor-like S, scavenger receptor [Source:MGI Symbol;Acc:MGI:1933397]	protein_coding	0.0362959	0.0495465	0.0591209
ENSMUSG00000015854	Cd5l	3	+	87357881	87371073	CD5 antigen-like [Source:MGI Symbol;Acc:MGI:1334419]	protein_coding	-0.0095225	0.0801891	0.120108
ENSMUSG00000015869	Prpsap1	11	-	116470845	116494202	phosphoribosyl pyrophosphate synthetase-associated protein 1 [Source:MGI Symbol;Acc:MGI:1915013]	protein_coding	13.8763	13.9554	14.238
ENSMUSG00000015879	Fam184b	5	-	45529705	45639614	family with sequence similarity 184, member B [Source:MGI Symbol;Acc:MGI:2442958]	protein_coding	0.0976817	0.0868875	0.0801023
ENSMUSG00000015880	Ncapg	5	+	45669919	45700546	non-SMC condensin I complex, subunit G [Source:MGI Symbol;Acc:MGI:1930197]	protein_coding	4.12217	4.24595	4.29167
ENSMUSG00000015882	Lcorl	5	-	45697181	45857615	ligand dependent nuclear receptor corepressor-like [Source:MGI Symbol;Acc:MGI:2651932]	protein_coding	3.82665	3.52237	3.44501
ENSMUSG00000015889	Lta4h	10	+	93453411	93484875	leukotriene A4 hydrolase [Source:MGI Symbol;Acc:MGI:96836]	protein_coding	146.134	143.743	142.827
ENSMUSG00000015890	Amdhd1	10	-	93523338	93540033	amidohydrolase domain containing 1 [Source:MGI Symbol;Acc:MGI:1919011]	protein_coding	0.0802868	0.105748	0.115859
ENSMUSG00000015932	Dstn	2	+	143915320	143943324	destrin [Source:MGI Symbol;Acc:MGI:1929270]	protein_coding	215.237	208.557	205.198
ENSMUSG00000015937	Macroh2a1	13	-	56073619	56136361	macroH2A.1 histone [Source:MGI Symbol;Acc:MGI:1349392]	protein_coding	126.105	107.602	99.0716
ENSMUSG00000015942	Gtf2ird2	5	+	134184019	134224355	GTF2I repeat domain containing 2 [Source:MGI Symbol;Acc:MGI:2149780]	protein_coding	3.86302	3.7948	3.77306
ENSMUSG00000015943	Bola1	3	-	96196588	96219709	bolA-like 1 (E. coli) [Source:MGI Symbol;Acc:MGI:1916418]	protein_coding	6.77964	7.65074	8.28021
ENSMUSG00000015944	Castor2	5	+	134099711	134144343	cytosolic arginine sensor for mTORC1 subunit 2 [Source:MGI Symbol;Acc:MGI:1933384]	protein_coding	0.79479	0.83507	0.848773
ENSMUSG00000015947	Fcgr1	3	-	96282909	96293969	Fc receptor, IgG, high affinity I [Source:MGI Symbol;Acc:MGI:95498]	protein_coding	0.063177	0.0669072	0.0664384
ENSMUSG00000015950	Ncf1	5	-	134220053	134229625	neutrophil cytosolic factor 1 [Source:MGI Symbol;Acc:MGI:97283]	protein_coding	246.852	251.351	253.075
ENSMUSG00000015957	Wnt11	7	+	98835112	98855195	wingless-type MMTV integration site family, member 11 [Source:MGI Symbol;Acc:MGI:101948]	protein_coding	0.0600195	0.0823352	0.0911695
ENSMUSG00000015961	Adss	1	-	177762962	177796511	adenylosuccinate synthetase, non muscle [Source:MGI Symbol;Acc:MGI:87948]	protein_coding	4.09202	3.86144	3.79543
ENSMUSG00000015962	1700016C15Rik	1	+	177729814	177753324	RIKEN cDNA 1700016C15 gene [Source:MGI Symbol;Acc:MGI:1916678]	protein_coding	-0.0341486	0.00742836	0.0277216
ENSMUSG00000015966	Il17rb	14	-	29996135	30008896	interleukin 17 receptor B [Source:MGI Symbol;Acc:MGI:1355292]	protein_coding	0.0700821	0.0905155	0.0974864
ENSMUSG00000015968	Cacna1d	14	-	30039939	30491455	calcium channel, voltage-dependent, L type, alpha 1D subunit [Source:MGI Symbol;Acc:MGI:88293]	protein_coding	0.165029	0.0753033	0.0577844
ENSMUSG00000015970	Chdh	14	+	30009023	30040527	choline dehydrogenase [Source:MGI Symbol;Acc:MGI:1860776]	protein_coding	0.371071	0.362573	0.345268
ENSMUSG00000015971	Actr8	14	+	29978337	30006354	ARP8 actin-related protein 8 [Source:MGI Symbol;Acc:MGI:1860775]	protein_coding	2.27767	2.24273	2.27833
ENSMUSG00000015980	Lrrc27	7	+	139212988	139242979	leucine rich repeat containing 27 [Source:MGI Symbol;Acc:MGI:1923862]	protein_coding	0.996025	1.04859	0.985708
ENSMUSG00000015981	Stk32c	7	-	139103638	139213307	serine/threonine kinase 32C [Source:MGI Symbol;Acc:MGI:2385336]	protein_coding	0.163454	0.15383	0.149967
ENSMUSG00000015994	Fnta	8	-	25998722	26015650	farnesyltransferase, CAAX box, alpha [Source:MGI Symbol;Acc:MGI:104683]	protein_coding	60.8278	63.7748	64.9404
ENSMUSG00000016018	Mtrex	13	-	112867418	112927398	Mtr4 exosome RNA helicase [Source:MGI Symbol;Acc:MGI:1919448]	protein_coding	4.10398	4.06319	4.07651
ENSMUSG00000016024	Lbp	2	+	158306493	158332852	lipopolysaccharide binding protein [Source:MGI Symbol;Acc:MGI:1098776]	protein_coding	2.10458	2.04592	1.99716
ENSMUSG00000016028	Celsr1	15	-	85898929	86034203	cadherin, EGF LAG seven-pass G-type receptor 1 [Source:MGI Symbol;Acc:MGI:1100883]	protein_coding	0.0792511	0.0672819	0.0600943
ENSMUSG00000016087	Fli1	9	-	32422204	32542861	Friend leukemia integration 1 [Source:MGI Symbol;Acc:MGI:95554]	protein_coding	20.3479	20.2665	20.2229
ENSMUSG00000016128	Stard13	5	-	151037510	151233836	StAR-related lipid transfer (START) domain containing 13 [Source:MGI Symbol;Acc:MGI:2385331]	protein_coding	0.207332	0.174405	0.160239
ENSMUSG00000016150	Tenm1	X	-	42527866	43429126	teneurin transmembrane protein 1 [Source:MGI Symbol;Acc:MGI:1345185]	protein_coding	0.0748206	0.0424843	0.0554797
ENSMUSG00000016179	Camk1g	1	-	193346346	193370298	calcium/calmodulin-dependent protein kinase I gamma [Source:MGI Symbol;Acc:MGI:2388073]	protein_coding	0.143898	0.135992	0.128377
ENSMUSG00000016181	Utp25	1	-	193091104	193130272	UTP25 small subunit processome component [Source:MGI Symbol;Acc:MGI:2138080]	protein_coding	0.217566	0.245908	0.270155
ENSMUSG00000016194	Hsd11b1	1	-	193221634	193264075	hydroxysteroid 11-beta dehydrogenase 1 [Source:MGI Symbol;Acc:MGI:103562]	protein_coding	174.258	173.31	175.468
ENSMUSG00000016200	Syt14	1	-	192891233	193035775	synaptotagmin XIV [Source:MGI Symbol;Acc:MGI:2444490]	protein_coding	0.10705	0.0732206	0.05145
ENSMUSG00000016206	H2-M3	17	+	37270220	37274484	histocompatibility 2, M region locus 3 [Source:MGI Symbol;Acc:MGI:95915]	protein_coding	0.0871798	0.0769572	0.0607834
ENSMUSG00000016239	Lonrf3	X	+	36328353	36362341	LON peptidase N-terminal domain and ring finger 3 [Source:MGI Symbol;Acc:MGI:1921615]	protein_coding	0.830371	0.835674	0.842025
ENSMUSG00000016252	Atp5e	2	-	174461072	174464105	ATP synthase, H+ transporting, mitochondrial F1 complex, epsilon subunit [Source:MGI Symbol;Acc:MGI:1855697]	protein_coding	343.964	330.446	324.763
ENSMUSG00000016253	Nelfcd	2	+	174415804	174427502	negative elongation factor complex member C/D, Th1l [Source:MGI Symbol;Acc:MGI:1926424]	protein_coding	2.82974	2.81816	2.91595
ENSMUSG00000016255	Tubb1	2	+	174450695	174457882	tubulin, beta 1 class VI [Source:MGI Symbol;Acc:MGI:107814]	protein_coding	0.0178067	-0.00163061	-0.0158905
ENSMUSG00000016256	Ctsz	2	-	174427493	174439039	cathepsin Z [Source:MGI Symbol;Acc:MGI:1891190]	protein_coding	53.5539	52.4265	52.3731
ENSMUSG00000016257	Prelid3b	2	-	174465067	174473081	PRELI domain containing 3B [Source:MGI Symbol;Acc:MGI:1913640]	protein_coding	14.6879	13.5217	12.8837
ENSMUSG00000016262	Sertad4	1	-	192844488	192855756	SERTA domain containing 4 [Source:MGI Symbol;Acc:MGI:2443496]	protein_coding	0.112559	0.104526	0.113089
ENSMUSG00000016283	H2-M2	17	-	37480851	37483552	histocompatibility 2, M region locus 2 [Source:MGI Symbol;Acc:MGI:95914]	protein_coding	0.0775649	0.0920265	0.10251
ENSMUSG00000016308	Ube2a	X	+	36873900	36884222	ubiquitin-conjugating enzyme E2A [Source:MGI Symbol;Acc:MGI:102959]	protein_coding	5.77988	5.94899	6.03463
ENSMUSG00000016319	Slc25a5	X	+	36795651	36798807	solute carrier family 25 (mitochondrial carrier, adenine nucleotide translocator), member 5 [Source:MGI Symbol;Acc:MGI:1353496]	protein_coding	367.415	353.516	348.451
ENSMUSG00000016327	Atp1b4	X	+	38316184	38336769	ATPase, (Na+)/K+ transporting, beta 4 polypeptide [Source:MGI Symbol;Acc:MGI:1915071]	protein_coding	0.0136919	0.0204507	0.0210031
ENSMUSG00000016344	Ppdpf	2	+	181187247	181188771	pancreatic progenitor cell differentiation and proliferation factor [Source:MGI Symbol;Acc:MGI:1913746]	protein_coding	0.671971	0.771928	0.824288
ENSMUSG00000016346	Kcnq2	2	-	181075579	181135300	potassium voltage-gated channel, subfamily Q, member 2 [Source:MGI Symbol;Acc:MGI:1309503]	protein_coding	0.26145	0.240082	0.222198
ENSMUSG00000016349	Eef1a2	2	-	181147653	181157014	eukaryotic translation elongation factor 1 alpha 2 [Source:MGI Symbol;Acc:MGI:1096317]	protein_coding	1.0439	0.991938	0.961071
ENSMUSG00000016356	Col20a1	2	+	180986535	181018363	collagen, type XX, alpha 1 [Source:MGI Symbol;Acc:MGI:1920618]	protein_coding	0.0561304	0.0679406	0.0595107
ENSMUSG00000016382	Pls3	X	-	75785654	75875182	plastin 3 (T-isoform) [Source:MGI Symbol;Acc:MGI:104807]	protein_coding	0.482886	0.513766	0.539819
ENSMUSG00000016386	Mpped2	2	+	106693269	106868356	metallophosphoesterase domain containing 2 [Source:MGI Symbol;Acc:MGI:1924265]	protein_coding	0.0747718	0.0811428	0.0991609
ENSMUSG00000016409	Nkap	X	+	37126795	37150746	NFKB activating protein [Source:MGI Symbol;Acc:MGI:1914300]	protein_coding	9.18487	9.19166	9.18403
ENSMUSG00000016427	Ndufa1	X	-	37187588	37191163	NADH:ubiquinone oxidoreductase subunit A1 [Source:MGI Symbol;Acc:MGI:1929511]	protein_coding	502.793	431.821	394.737
ENSMUSG00000016458	Wt1	2	+	105126529	105173616	Wilms tumor 1 homolog [Source:MGI Symbol;Acc:MGI:98968]	protein_coding	-0.0404686	0.00887547	0.033007
ENSMUSG00000016477	E2f3	13	-	29906575	29986063	E2F transcription factor 3 [Source:MGI Symbol;Acc:MGI:1096340]	protein_coding	0.591917	0.650902	0.678061
ENSMUSG00000016481	Cr1l	1	-	195097382	195131586	complement component (3b/4b) receptor 1-like [Source:MGI Symbol;Acc:MGI:88513]	protein_coding	18.6282	18.5816	18.692
ENSMUSG00000016487	Ppfibp1	6	+	146888487	147032025	PTPRF interacting protein, binding protein 1 (liprin beta 1) [Source:MGI Symbol;Acc:MGI:1914783]	protein_coding	0.808469	0.735669	0.69974
ENSMUSG00000016493	Cd46	1	-	195036826	195092249	CD46 antigen, complement regulatory protein [Source:MGI Symbol;Acc:MGI:1203290]	protein_coding	0.115909	0.0432038	0.0419337
ENSMUSG00000016494	Cd34	1	+	194938819	194961279	CD34 antigen [Source:MGI Symbol;Acc:MGI:88329]	protein_coding	0.792924	0.626011	0.62308
ENSMUSG00000016495	Plgrkt	19	-	29348599	29367390	plasminogen receptor, C-terminal lysine transmembrane protein [Source:MGI Symbol;Acc:MGI:1915009]	protein_coding	62.6757	60.1534	58.3604
ENSMUSG00000016496	Cd274	19	+	29367455	29388095	CD274 antigen [Source:MGI Symbol;Acc:MGI:1926446]	protein_coding	3.09521	2.80642	2.69978
ENSMUSG00000016498	Pdcd1lg2	19	+	29410919	29471161	programmed cell death 1 ligand 2 [Source:MGI Symbol;Acc:MGI:1930125]	protein_coding	0.129484	0.0935962	0.078133
ENSMUSG00000016503	Gtf3a	5	+	146948657	146955614	general transcription factor III A [Source:MGI Symbol;Acc:MGI:1913846]	protein_coding	12.2121	12.9349	13.3717
ENSMUSG00000016510	Mtif3	5	-	146951573	146963800	mitochondrial translational initiation factor 3 [Source:MGI Symbol;Acc:MGI:1923616]	protein_coding	3.49409	3.54639	3.57295
ENSMUSG00000016520	Lnx2	5	-	147016655	147076586	ligand of numb-protein X 2 [Source:MGI Symbol;Acc:MGI:2155959]	protein_coding	1.04433	0.915976	0.895216
ENSMUSG00000016524	Il19	1	-	130932656	130940115	interleukin 19 [Source:MGI Symbol;Acc:MGI:1890472]	protein_coding	-0.00322057	0.00160883	0.00161953
ENSMUSG00000016526	Dyrk3	1	-	131127455	131138340	dual-specificity tyrosine-(Y)-phosphorylation regulated kinase 3 [Source:MGI Symbol;Acc:MGI:1330300]	protein_coding	0.0820421	0.141691	0.167838
ENSMUSG00000016528	Mapkapk2	1	-	131053700	131097826	MAP kinase-activated protein kinase 2 [Source:MGI Symbol;Acc:MGI:109298]	protein_coding	10.9987	10.6667	10.563
ENSMUSG00000016529	Il10	1	+	131019845	131024974	interleukin 10 [Source:MGI Symbol;Acc:MGI:96537]	protein_coding	-0.0575343	0.0108832	0.0496233
ENSMUSG00000016534	Lamp2	X	-	38401357	38456454	lysosomal-associated membrane protein 2 [Source:MGI Symbol;Acc:MGI:96748]	protein_coding	56.5082	51.3346	49.066
ENSMUSG00000016541	Atxn10	15	+	85336245	85463212	ataxin 10 [Source:MGI Symbol;Acc:MGI:1859293]	protein_coding	56.4776	49.0941	45.7139
ENSMUSG00000016552	Foxred2	15	-	77940522	77956722	FAD-dependent oxidoreductase domain containing 2 [Source:MGI Symbol;Acc:MGI:106315]	protein_coding	2.56172	2.88043	3.07751
ENSMUSG00000016554	Eif3d	15	-	77958998	77970813	eukaryotic translation initiation factor 3, subunit D [Source:MGI Symbol;Acc:MGI:1933181]	protein_coding	28.7688	30.6305	31.5041
ENSMUSG00000016559	H3f3b	11	-	116021912	116027962	H3.3 histone B [Source:MGI Symbol;Acc:MGI:1101768]	protein_coding	981.053	1012.49	1029.87
ENSMUSG00000016619	Nup50	15	+	84923411	84942963	nucleoporin 50 [Source:MGI Symbol;Acc:MGI:1351502]	protein_coding	5.85096	5.40143	5.24052
ENSMUSG00000016624	Phf21b	15	-	84785381	84856049	PHD finger protein 21B [Source:MGI Symbol;Acc:MGI:2443812]	protein_coding	0.278562	0.2858	0.274263
ENSMUSG00000016626	Nlrp14	7	+	107166990	107198102	NLR family, pyrin domain containing 14 [Source:MGI Symbol;Acc:MGI:1924108]	protein_coding	0.699808	0.725624	0.797659
ENSMUSG00000016637	Ift27	15	-	78159463	78174107	intraflagellar transport 27 [Source:MGI Symbol;Acc:MGI:1914292]	protein_coding	2.62036	2.51913	2.52204
ENSMUSG00000016664	Pacsin2	15	-	83375607	83464606	protein kinase C and casein kinase substrate in neurons 2 [Source:MGI Symbol;Acc:MGI:1345153]	protein_coding	7.53994	9.20424	10.2036
ENSMUSG00000016756	Cmah	13	+	24327404	24477377	cytidine monophospho-N-acetylneuraminic acid hydroxylase [Source:MGI Symbol;Acc:MGI:103227]	protein_coding	0.889504	0.984569	1.03713
ENSMUSG00000016757	Ttll12	15	-	83575090	83595157	tubulin tyrosine ligase-like family, member 12 [Source:MGI Symbol;Acc:MGI:3039573]	protein_coding	0.756263	0.795996	0.841837
ENSMUSG00000016758	Bik	15	+	83526862	83544634	BCL2-interacting killer [Source:MGI Symbol;Acc:MGI:1206591]	protein_coding	0.0819374	0.0968981	0.0777737
ENSMUSG00000016763	Scube1	15	-	83604999	83725021	signal peptide, CUB domain, EGF-like 1 [Source:MGI Symbol;Acc:MGI:1890616]	protein_coding	0.130436	0.0787887	0.0745135
ENSMUSG00000016831	Tox4	14	+	52279146	52296401	TOX high mobility group box family member 4 [Source:MGI Symbol;Acc:MGI:1915389]	protein_coding	3.42048	3.73839	3.87198
ENSMUSG00000016833	Mrps18c	5	+	100798627	100804471	mitochondrial ribosomal protein S18C [Source:MGI Symbol;Acc:MGI:1915985]	protein_coding	425.23	367.681	337.034
ENSMUSG00000016918	Sulf1	1	+	12692277	12861192	sulfatase 1 [Source:MGI Symbol;Acc:MGI:2138563]	protein_coding	0.250349	0.160219	0.1812
ENSMUSG00000016921	Srsf6	2	+	162931528	162937121	serine and arginine-rich splicing factor 6 [Source:MGI Symbol;Acc:MGI:1915246]	protein_coding	49.5579	54.8411	57.7709
ENSMUSG00000016933	Plcg1	2	+	160731300	160775760	phospholipase C, gamma 1 [Source:MGI Symbol;Acc:MGI:97615]	protein_coding	0.188392	0.20073	0.205106
ENSMUSG00000016940	Kctd2	11	+	115420128	115431274	potassium channel tetramerisation domain containing 2 [Source:MGI Symbol;Acc:MGI:1917632]	protein_coding	0.325933	0.339994	0.351583
ENSMUSG00000016942	Tmprss6	15	-	78439667	78468634	transmembrane serine protease 6 [Source:MGI Symbol;Acc:MGI:1919003]	protein_coding	0.136837	0.126715	0.119325
ENSMUSG00000016946	Kctd5	17	-	24047734	24073485	potassium channel tetramerisation domain containing 5 [Source:MGI Symbol;Acc:MGI:1916509]	protein_coding	2.3115	1.9215	1.74664
ENSMUSG00000016982	Pom121l2	13	+	21981194	21988734	POM121 membrane glycoprotein-like 2 (rat) [Source:MGI Symbol;Acc:MGI:2684870]	protein_coding	-0.02018	0.0062243	0.0142825
ENSMUSG00000016984	Etaa1	11	-	17938756	17953875	Ewing tumor-associated antigen 1 [Source:MGI Symbol;Acc:MGI:1915395]	protein_coding	0.154201	0.123591	0.113569
ENSMUSG00000016995	Matn4	2	-	164389393	164405160	matrilin 4 [Source:MGI Symbol;Acc:MGI:1328314]	protein_coding	0.096474	0.108317	0.114204
ENSMUSG00000016998	Svs4	2	-	164275952	164278459	seminal vesicle secretory protein 4 [Source:MGI Symbol;Acc:MGI:98450]	protein_coding	-0.00717881	0.00268274	0.00453581
ENSMUSG00000017000	Svs6	2	+	164316751	164318453	seminal vesicle secretory protein 6 [Source:MGI Symbol;Acc:MGI:106178]	protein_coding	0.0295474	0.0562669	0.07138
ENSMUSG00000017002	Slpi	2	-	164354070	164389095	secretory leukocyte peptidase inhibitor [Source:MGI Symbol;Acc:MGI:109297]	protein_coding	41.6498	41.9509	41.3174
ENSMUSG00000017003	Svs3a	2	+	164289268	164291500	seminal vesicle secretory protein 3A [Source:MGI Symbol;Acc:MGI:1927635]	protein_coding	-0.00898795	0.00293614	0.00611538
ENSMUSG00000017004	Svs5	2	+	164332740	164334396	seminal vesicle secretory protein 5 [Source:MGI Symbol;Acc:MGI:98453]	protein_coding	0.193196	0.238821	0.258562
ENSMUSG00000017007	Rbpjl	2	+	164403141	164415448	recombination signal binding protein for immunoglobulin kappa J region-like [Source:MGI Symbol;Acc:MGI:1196616]	protein_coding	0.0729253	0.0713117	0.0668949
ENSMUSG00000017009	Sdc4	2	-	164424247	164443887	syndecan 4 [Source:MGI Symbol;Acc:MGI:1349164]	protein_coding	1.30639	1.31942	1.31745
ENSMUSG00000017049	Ccdc70	8	+	21969775	21974041	coiled-coil domain containing 70 [Source:MGI Symbol;Acc:MGI:1915179]	protein_coding	0.00735836	0.0408271	0.0533085
ENSMUSG00000017057	Il13ra1	X	+	36112110	36171259	interleukin 13 receptor, alpha 1 [Source:MGI Symbol;Acc:MGI:105052]	protein_coding	9.81124	9.53906	9.20895
ENSMUSG00000017064	Prl5a1	13	+	28142484	28151611	prolactin family 5, subfamily a, member 1 [Source:MGI Symbol;Acc:MGI:106332]	protein_coding	0.00486753	-0.0151416	0.010456
ENSMUSG00000017119	Nbr1	11	+	101552149	101581951	NBR1, autophagy cargo receptor [Source:MGI Symbol;Acc:MGI:108498]	protein_coding	16.1819	17.2696	17.6763
ENSMUSG00000017132	Cyth1	11	-	118132019	118248592	cytohesin 1 [Source:MGI Symbol;Acc:MGI:1334257]	protein_coding	3.71034	3.79759	3.83974
ENSMUSG00000017144	Rnd3	2	-	51130438	51149111	Rho family GTPase 3 [Source:MGI Symbol;Acc:MGI:1921444]	protein_coding	0.161732	0.188979	0.1997
ENSMUSG00000017146	Brca1	11	-	101488764	101551955	breast cancer 1, early onset [Source:MGI Symbol;Acc:MGI:104537]	protein_coding	0.0785725	0.0840394	0.0734511
ENSMUSG00000017165	Gast	11	+	100334407	100336996	gastrin [Source:MGI Symbol;Acc:MGI:104768]	protein_coding	0.0330626	-0.00607078	-0.0260921
ENSMUSG00000017167	Cntnap1	11	+	101170523	101190724	contactin associated protein-like 1 [Source:MGI Symbol;Acc:MGI:1858201]	protein_coding	0.20292	0.193116	0.174611
ENSMUSG00000017176	Nt5c3b	11	-	100422321	100441808	5'-nucleotidase, cytosolic IIIB [Source:MGI Symbol;Acc:MGI:1915356]	protein_coding	0.249888	0.406211	0.478476
ENSMUSG00000017188	Coa3	11	-	101277968	101279114	cytochrome C oxidase assembly factor 3 [Source:MGI Symbol;Acc:MGI:1098757]	protein_coding	105.165	74.8939	62.7558
ENSMUSG00000017195	Zpbp2	11	+	98551097	98558665	zona pellucida binding protein 2 [Source:MGI Symbol;Acc:MGI:1916626]	protein_coding	0.0501862	0.00432471	0.0126564
ENSMUSG00000017204	Gsdma	11	+	98664351	98677708	gasdermin A [Source:MGI Symbol;Acc:MGI:1889509]	protein_coding	0.0417835	0.0481274	0.0414
ENSMUSG00000017210	Med24	11	-	98704591	98729435	mediator complex subunit 24 [Source:MGI Symbol;Acc:MGI:1344385]	protein_coding	4.65447	4.8396	4.86017
ENSMUSG00000017211	Gsdma2	11	+	98646759	98657964	gasdermin A2 [Source:MGI Symbol;Acc:MGI:1921490]	protein_coding	0.17089	0.166342	0.138461
ENSMUSG00000017221	Psmd3	11	+	98682554	98695979	proteasome (prosome, macropain) 26S subunit, non-ATPase, 3 [Source:MGI Symbol;Acc:MGI:98858]	protein_coding	5.36917	5.35992	5.34245
ENSMUSG00000017264	Exosc10	4	+	148558429	148582401	exosome component 10 [Source:MGI Symbol;Acc:MGI:1355322]	protein_coding	3.9956	4.17064	4.39869
ENSMUSG00000017286	Glod4	11	-	76120987	76243725	glyoxalase domain containing 4 [Source:MGI Symbol;Acc:MGI:1914451]	protein_coding	7.78905	9.86877	11.0725
ENSMUSG00000017288	Vps53	11	-	76046226	76179647	VPS53 GARP complex subunit [Source:MGI Symbol;Acc:MGI:1915549]	protein_coding	5.55054	5.71799	5.8965
ENSMUSG00000017291	Taok1	11	-	77529162	77607815	TAO kinase 1 [Source:MGI Symbol;Acc:MGI:1914490]	protein_coding	0.543776	0.736603	0.863788
ENSMUSG00000017299	Dnttip1	2	+	164745983	164768607	deoxynucleotidyltransferase, terminal, interacting protein 1 [Source:MGI Symbol;Acc:MGI:1923483]	protein_coding	10.5469	11.8173	12.5175
ENSMUSG00000017300	Tnnc2	2	-	164777161	164779967	troponin C2, fast [Source:MGI Symbol;Acc:MGI:98780]	protein_coding	13.1683	12.6252	12.319
ENSMUSG00000017307	Acot8	2	-	164792765	164804882	acyl-CoA thioesterase 8 [Source:MGI Symbol;Acc:MGI:2158201]	protein_coding	3.40516	3.49531	3.35655
ENSMUSG00000017309	Cd300lg	11	+	102041509	102055620	CD300 molecule like family member G [Source:MGI Symbol;Acc:MGI:1289168]	protein_coding	0.220044	0.18242	0.196839
ENSMUSG00000017310	Spint4	2	+	164698501	164702453	serine protease inhibitor, Kunitz type 4 [Source:MGI Symbol;Acc:MGI:1925489]	protein_coding	-0.00714744	0.00237698	0.00481049
ENSMUSG00000017311	Pyy	11	-	102106676	102107832	peptide YY [Source:MGI Symbol;Acc:MGI:99924]	protein_coding	2.09901	2.1472	2.14031
ENSMUSG00000017314	Mpp2	11	-	102057015	102088515	membrane protein, palmitoylated 2 (MAGUK p55 subfamily member 2) [Source:MGI Symbol;Acc:MGI:1858257]	protein_coding	0.235416	0.173461	0.140773
ENSMUSG00000017316	Ppy	11	-	102099930	102101319	pancreatic polypeptide [Source:MGI Symbol;Acc:MGI:97753]	protein_coding	2.48531	2.3471	2.23771
ENSMUSG00000017344	Vtn	11	+	78499091	78502324	vitronectin [Source:MGI Symbol;Acc:MGI:98940]	protein_coding	0.519465	0.577028	0.598997
ENSMUSG00000017376	Nlk	11	-	78567168	78697373	nemo like kinase [Source:MGI Symbol;Acc:MGI:1201387]	protein_coding	0.465926	0.558973	0.587345
ENSMUSG00000017386	Traf4	11	-	78158499	78165589	TNF receptor associated factor 4 [Source:MGI Symbol;Acc:MGI:1202880]	protein_coding	0.0363115	0.0636946	0.0694416
ENSMUSG00000017390	Aldoc	11	+	78322968	78327781	aldolase C, fructose-bisphosphate [Source:MGI Symbol;Acc:MGI:101863]	protein_coding	1.49555	1.38461	1.34443
ENSMUSG00000017400	Stac2	11	-	98036623	98053462	SH3 and cysteine rich domain 2 [Source:MGI Symbol;Acc:MGI:2144518]	protein_coding	0.137975	0.0580888	0.0643146
ENSMUSG00000017404	Rpl19	11	+	98026710	98030492	ribosomal protein L19 [Source:MGI Symbol;Acc:MGI:98020]	protein_coding	372.518	353.154	344.358
ENSMUSG00000017405	Nek8	11	-	78166106	78176675	NIMA (never in mitosis gene a)-related expressed kinase 8 [Source:MGI Symbol;Acc:MGI:1890646]	protein_coding	0.25207	0.287062	0.311986
ENSMUSG00000017412	Cacnb4	2	-	52428320	52676831	calcium channel, voltage-dependent, beta 4 subunit [Source:MGI Symbol;Acc:MGI:103301]	protein_coding	0.118874	0.0647558	0.05673
ENSMUSG00000017417	Plxdc1	11	-	97923238	97986444	plexin domain containing 1 [Source:MGI Symbol;Acc:MGI:1919574]	protein_coding	0.0410027	0.109994	0.126698
ENSMUSG00000017418	Arl5b	2	+	15049395	15082456	ADP-ribosylation factor-like 5B [Source:MGI Symbol;Acc:MGI:1923119]	protein_coding	0.317253	0.380419	0.398879
ENSMUSG00000017421	Zfp207	11	+	80383279	80405733	zinc finger protein 207 [Source:MGI Symbol;Acc:MGI:1340045]	protein_coding	156.942	153.686	152.272
ENSMUSG00000017428	Psmd11	11	+	80428615	80473248	proteasome (prosome, macropain) 26S subunit, non-ATPase, 11 [Source:MGI Symbol;Acc:MGI:1916327]	protein_coding	9.43369	9.09078	8.94193
ENSMUSG00000017446	C1qtnf1	11	+	118428203	118449963	C1q and tumor necrosis factor related protein 1 [Source:MGI Symbol;Acc:MGI:1919254]	protein_coding	0.147805	0.111454	0.092664
ENSMUSG00000017453	Pipox	11	-	77880615	77894096	pipecolic acid oxidase [Source:MGI Symbol;Acc:MGI:1197006]	protein_coding	0.373837	0.408768	0.419881
ENSMUSG00000017466	Timp2	11	-	118301069	118355740	tissue inhibitor of metalloproteinase 2 [Source:MGI Symbol;Acc:MGI:98753]	protein_coding	17.1349	17.0318	17.1012
ENSMUSG00000017478	Zc3h18	8	+	122376609	122417360	zinc finger CCCH-type containing 18 [Source:MGI Symbol;Acc:MGI:1923264]	protein_coding	1.72957	1.98555	2.10658
ENSMUSG00000017485	Top2b	14	+	16365179	16435462	topoisomerase (DNA) II beta [Source:MGI Symbol;Acc:MGI:98791]	protein_coding	2.82842	2.93074	2.95948
ENSMUSG00000017491	Rarb	14	-	16430839	16819156	retinoic acid receptor, beta [Source:MGI Symbol;Acc:MGI:97857]	protein_coding	0.00292043	0.0226044	0.0253221
ENSMUSG00000017493	Igfbp4	11	+	99041244	99054392	insulin-like growth factor binding protein 4 [Source:MGI Symbol;Acc:MGI:96439]	protein_coding	12.8503	13.2313	13.6643
ENSMUSG00000017499	Cdc6	11	+	98907801	98923940	cell division cycle 6 [Source:MGI Symbol;Acc:MGI:1345150]	protein_coding	0.380875	0.430183	0.468419
ENSMUSG00000017548	Suz12	11	+	79993106	80034123	SUZ12 polycomb repressive complex 2 subunit [Source:MGI Symbol;Acc:MGI:1261758]	protein_coding	3.68573	3.98121	4.21609
ENSMUSG00000017550	Atad5	11	+	80089400	80135794	ATPase family, AAA domain containing 5 [Source:MGI Symbol;Acc:MGI:2442925]	protein_coding	4.15184	4.18509	4.14725
ENSMUSG00000017561	Crlf3	11	-	80046493	80080991	cytokine receptor-like factor 3 [Source:MGI Symbol;Acc:MGI:1860086]	protein_coding	7.15465	7.24764	7.44969
ENSMUSG00000017588	Krt27	11	-	99345565	99351104	keratin 27 [Source:MGI Symbol;Acc:MGI:1339999]	protein_coding	0.0372592	0.0792304	0.101588
ENSMUSG00000017607	Tns4	11	-	99065678	99089306	tensin 4 [Source:MGI Symbol;Acc:MGI:2144377]	protein_coding	0.857411	0.817734	0.7975
ENSMUSG00000017615	Tnfaip1	11	-	78522850	78536332	tumor necrosis factor, alpha-induced protein 1 (endothelial) [Source:MGI Symbol;Acc:MGI:104961]	protein_coding	2.1381	2.10434	2.09612
ENSMUSG00000017631	Abr	11	-	76416734	76623558	active BCR-related gene [Source:MGI Symbol;Acc:MGI:107771]	protein_coding	7.27565	6.71562	6.50608
ENSMUSG00000017639	Rab11fip4	11	+	79591212	79698023	RAB11 family interacting protein 4 (class II) [Source:MGI Symbol;Acc:MGI:2442920]	protein_coding	0.337258	0.333589	0.337806
ENSMUSG00000017652	Cd40	2	+	165055627	165072948	CD40 antigen [Source:MGI Symbol;Acc:MGI:88336]	protein_coding	0.0908797	0.0544035	0.0354219
ENSMUSG00000017664	Slc35c2	2	-	165276554	165287869	solute carrier family 35, member C2 [Source:MGI Symbol;Acc:MGI:2385166]	protein_coding	29.5193	30.653	31.2383
ENSMUSG00000017667	Zfp334	2	-	165374264	165388259	zinc finger protein 334 [Source:MGI Symbol;Acc:MGI:2388656]	protein_coding	0.0351805	0.0356475	0.0323798
ENSMUSG00000017670	Elmo2	2	-	165288031	165326479	engulfment and cell motility 2 [Source:MGI Symbol;Acc:MGI:2153045]	protein_coding	9.08718	9.40821	9.56453
ENSMUSG00000017677	Wsb1	11	-	79239372	79254671	WD repeat and SOCS box-containing 1 [Source:MGI Symbol;Acc:MGI:1926139]	protein_coding	136.941	120.453	114.72
ENSMUSG00000017679	Ttpal	2	+	163602314	163619013	tocopherol (alpha) transfer protein-like [Source:MGI Symbol;Acc:MGI:1923330]	protein_coding	0.54864	0.578469	0.597061
ENSMUSG00000017686	Rhot1	11	+	80209019	80267907	ras homolog family member T1 [Source:MGI Symbol;Acc:MGI:1926078]	protein_coding	1.04603	0.961568	0.931938
ENSMUSG00000017688	Hnf4g	3	+	3508030	3658052	hepatocyte nuclear factor 4, gamma [Source:MGI Symbol;Acc:MGI:1353604]	protein_coding	1.55078	1.38145	1.36406
ENSMUSG00000017692	Rhbdl3	11	+	80300912	80355955	rhomboid like 3 [Source:MGI Symbol;Acc:MGI:2179276]	protein_coding	0.0299397	0.0986968	0.12273
ENSMUSG00000017697	Ada	2	-	163726584	163750239	adenosine deaminase [Source:MGI Symbol;Acc:MGI:87916]	protein_coding	135.887	134.945	134.62
ENSMUSG00000017707	Serinc3	2	-	163623272	163645131	serine incorporator 3 [Source:MGI Symbol;Acc:MGI:1349457]	protein_coding	14.7549	15.3316	15.8001
ENSMUSG00000017713	Tha1	11	-	117867952	117873481	threonine aldolase 1 [Source:MGI Symbol;Acc:MGI:1919026]	protein_coding	0.203078	0.263341	0.26124
ENSMUSG00000017715	Pgs1	11	+	117986292	118024011	phosphatidylglycerophosphate synthase 1 [Source:MGI Symbol;Acc:MGI:1921701]	protein_coding	22.9695	22.4688	22.0162
ENSMUSG00000017716	Birc5	11	+	117849251	117855743	baculoviral IAP repeat-containing 5 [Source:MGI Symbol;Acc:MGI:1203517]	protein_coding	66.9786	66.0059	65.1461
ENSMUSG00000017718	Afmid	11	+	117825924	117839908	arylformamidase [Source:MGI Symbol;Acc:MGI:2448704]	protein_coding	0.483776	0.536788	0.58996
ENSMUSG00000017720	Trp53tg5	2	-	164470301	164473724	transformation related protein 53 target 5 [Source:MGI Symbol;Acc:MGI:1920853]	protein_coding	-0.022268	0.00611005	0.0165639
ENSMUSG00000017721	Pigt	2	+	164497520	164508301	phosphatidylinositol glycan anchor biosynthesis, class T [Source:MGI Symbol;Acc:MGI:1926178]	protein_coding	2.98572	3.19007	3.29194
ENSMUSG00000017723	Wfdc2	2	+	164562413	164568510	WAP four-disulfide core domain 2 [Source:MGI Symbol;Acc:MGI:1914951]	protein_coding	0.0838536	0.109258	0.118621
ENSMUSG00000017724	Etv4	11	-	101769742	101785371	ets variant 4 [Source:MGI Symbol;Acc:MGI:99423]	protein_coding	0.0437929	0.0718966	0.0847008
ENSMUSG00000017733	Eppin	2	-	164588343	164593594	epididymal peptidase inhibitor [Source:MGI Symbol;Acc:MGI:1922776]	protein_coding	0.0482724	-0.0111013	-0.0353405
ENSMUSG00000017734	Dbndd2	2	+	164486106	164493319	dysbindin (dystrobrevin binding protein 1) domain containing 2 [Source:MGI Symbol;Acc:MGI:106562]	protein_coding	0.473681	0.872931	1.19236
ENSMUSG00000017737	Mmp9	2	+	164940780	164955850	matrix metallopeptidase 9 [Source:MGI Symbol;Acc:MGI:97011]	protein_coding	186.845	183.718	181.797
ENSMUSG00000017740	Slc12a5	2	+	164960802	164999731	solute carrier family 12, member 5 [Source:MGI Symbol;Acc:MGI:1862037]	protein_coding	0.918679	0.912614	0.917365
ENSMUSG00000017747	Ghdc	11	-	100766032	100770957	GH3 domain containing [Source:MGI Symbol;Acc:MGI:1931556]	protein_coding	0.299551	0.358031	0.367222
ENSMUSG00000017754	Pltp	2	-	164839518	164857711	phospholipid transfer protein [Source:MGI Symbol;Acc:MGI:103151]	protein_coding	0.517368	0.539797	0.548113
ENSMUSG00000017756	Slc12a7	13	+	73733094	73816754	solute carrier family 12, member 7 [Source:MGI Symbol;Acc:MGI:1342283]	protein_coding	0.509724	0.587141	0.572332
ENSMUSG00000017760	Ctsa	2	+	164832873	164841032	cathepsin A [Source:MGI Symbol;Acc:MGI:97748]	protein_coding	8.95427	9.29283	9.60322
ENSMUSG00000017764	Zswim1	2	+	164822686	164826871	zinc finger SWIM-type containing 1 [Source:MGI Symbol;Acc:MGI:1919221]	protein_coding	0.197387	0.207217	0.206849
ENSMUSG00000017765	Slc12a4	8	-	105943590	105966097	solute carrier family 12, member 4 [Source:MGI Symbol;Acc:MGI:1309465]	protein_coding	0.134932	0.21308	0.216936
ENSMUSG00000017767	Spata25	2	-	164826389	164828537	spermatogenesis associated 25 [Source:MGI Symbol;Acc:MGI:1922892]	protein_coding	0.0176393	-0.00160122	-0.0157575
ENSMUSG00000017774	Myo1c	11	+	75650504	75673910	myosin IC [Source:MGI Symbol;Acc:MGI:106612]	protein_coding	1.21959	1.29238	1.27519
ENSMUSG00000017776	Crk	11	+	75679259	75706908	v-crk avian sarcoma virus CT10 oncogene homolog [Source:MGI Symbol;Acc:MGI:88508]	protein_coding	2.39348	2.68793	2.70934
ENSMUSG00000017778	Cox7c	13	-	86044816	86046904	cytochrome c oxidase subunit 7C [Source:MGI Symbol;Acc:MGI:103226]	protein_coding	533.962	485.69	461.702
ENSMUSG00000017781	Pitpna	11	+	75588097	75628804	phosphatidylinositol transfer protein, alpha [Source:MGI Symbol;Acc:MGI:99887]	protein_coding	31.045	28.6631	27.5792
ENSMUSG00000017801	Mlx	11	+	101087277	101092207	MAX-like protein X [Source:MGI Symbol;Acc:MGI:108398]	protein_coding	3.06226	3.34812	3.35404
ENSMUSG00000017802	Retreg3	11	-	101096322	101119893	reticulophagy regulator family member 3 [Source:MGI Symbol;Acc:MGI:1915248]	protein_coding	0.502953	0.531409	0.544973
ENSMUSG00000017817	Jph2	2	-	163336242	163397993	junctophilin 2 [Source:MGI Symbol;Acc:MGI:1891496]	protein_coding	0.101287	0.11698	0.124725
ENSMUSG00000017830	Dhx58	11	-	100694884	100704271	DEXH (Asp-Glu-X-His) box polypeptide 58 [Source:MGI Symbol;Acc:MGI:1931560]	protein_coding	0.783724	0.787201	0.763583
ENSMUSG00000017831	Rab5a	17	+	53479234	53507680	RAB5A, member RAS oncogene family [Source:MGI Symbol;Acc:MGI:105926]	protein_coding	2.00944	1.88801	1.80348
ENSMUSG00000017832	Hspb9	11	+	100713850	100714575	heat shock protein, alpha-crystallin-related, B9 [Source:MGI Symbol;Acc:MGI:1922732]	protein_coding	0.0346065	0.067556	0.084465
ENSMUSG00000017837	Nkiras2	11	+	100619244	100627607	NFKB inhibitor interacting Ras-like protein 2 [Source:MGI Symbol;Acc:MGI:1919216]	protein_coding	1.35049	1.50286	1.52391
ENSMUSG00000017843	Ppp2r5c	12	+	110447120	110583062	protein phosphatase 2, regulatory subunit B', gamma [Source:MGI Symbol;Acc:MGI:1349475]	protein_coding	37.437	35.1104	33.6587
ENSMUSG00000017858	Ift52	2	+	163017354	163046141	intraflagellar transport 52 [Source:MGI Symbol;Acc:MGI:2387217]	protein_coding	4.2296	3.86865	3.65969
ENSMUSG00000017861	Mybl2	2	+	163054687	163084688	myeloblastosis oncogene-like 2 [Source:MGI Symbol;Acc:MGI:101785]	protein_coding	0.324033	0.388894	0.429875
ENSMUSG00000017868	Sgk2	2	+	162987330	163014127	serum/glucocorticoid regulated kinase 2 [Source:MGI Symbol;Acc:MGI:1351318]	protein_coding	0.453732	0.438798	0.427822
ENSMUSG00000017897	Eya2	2	+	165595032	165771727	EYA transcriptional coactivator and phosphatase 2 [Source:MGI Symbol;Acc:MGI:109341]	protein_coding	0.0693314	0.133819	0.176478
ENSMUSG00000017922	Prl3c1	13	+	27196659	27203749	prolactin family 3, subfamily c, member 1 [Source:MGI Symbol;Acc:MGI:1351649]	protein_coding	0.00334443	-0.00286016	0.0536998
ENSMUSG00000017929	B4galt5	2	-	167298444	167349183	UDP-Gal:betaGlcNAc beta 1,4-galactosyltransferase, polypeptide 5 [Source:MGI Symbol;Acc:MGI:1927169]	protein_coding	6.32128	6.27455	6.25909
ENSMUSG00000017943	Gdap1l1	2	+	163438476	163455324	ganglioside-induced differentiation-associated protein 1-like 1 [Source:MGI Symbol;Acc:MGI:2385163]	protein_coding	0.202086	0.200377	0.180136
ENSMUSG00000017950	Hnf4a	2	+	163506808	163572910	hepatic nuclear factor 4, alpha [Source:MGI Symbol;Acc:MGI:109128]	protein_coding	0.969016	0.979361	0.972007
ENSMUSG00000017969	Ptgis	2	-	167191805	167240604	prostaglandin I2 (prostacyclin) synthase [Source:MGI Symbol;Acc:MGI:1097156]	protein_coding	0.125763	0.129296	0.127452
ENSMUSG00000017978	Cadps2	6	-	23262773	23839421	Ca2+-dependent activator protein for secretion 2 [Source:MGI Symbol;Acc:MGI:2443963]	protein_coding	0.141549	0.102941	0.108938
ENSMUSG00000017999	Ddx27	2	+	167015193	167034947	DEAD (Asp-Glu-Ala-Asp) box polypeptide 27 [Source:MGI Symbol;Acc:MGI:2385884]	protein_coding	2.26291	2.26653	2.23755
ENSMUSG00000018001	Cyth3	5	+	143622447	143710250	cytohesin 3 [Source:MGI Symbol;Acc:MGI:1335107]	protein_coding	0.362547	0.191171	0.120835
ENSMUSG00000018008	Cyth4	15	+	78597047	78622019	cytohesin 4 [Source:MGI Symbol;Acc:MGI:2441702]	protein_coding	16.021	18.2398	19.488
ENSMUSG00000018012	Rac3	11	+	120721470	120723969	Rac family small GTPase 3 [Source:MGI Symbol;Acc:MGI:2180784]	protein_coding	0.285442	0.297709	0.30718
ENSMUSG00000018040	Rrp7a	15	-	83113433	83122801	ribosomal RNA processing 7 homolog A (S. cerevisiae) [Source:MGI Symbol;Acc:MGI:1922028]	protein_coding	8.15694	8.95988	9.30664
ENSMUSG00000018042	Cyb5r3	15	-	83153494	83172592	cytochrome b5 reductase 3 [Source:MGI Symbol;Acc:MGI:94893]	protein_coding	19.737	18.6058	18.1341
ENSMUSG00000018068	Ints2	11	-	86210681	86257575	integrator complex subunit 2 [Source:MGI Symbol;Acc:MGI:1917672]	protein_coding	0.52607	0.491214	0.480185
ENSMUSG00000018076	Med13l	5	+	118560679	118765438	mediator complex subunit 13-like [Source:MGI Symbol;Acc:MGI:2670178]	protein_coding	7.92373	7.14964	6.82749
ENSMUSG00000018102	H2bc4	13	+	23684199	23692908	H2B clustered histone 4 [Source:MGI Symbol;Acc:MGI:1915274]	protein_coding	4.4148	4.50451	4.61734
ENSMUSG00000018126	Baiap2l2	15	-	79258195	79285537	BAI1-associated protein 2-like 2 [Source:MGI Symbol;Acc:MGI:2652819]	protein_coding	0.617278	0.589114	0.573144
ENSMUSG00000018143	Mafk	5	+	139791513	139802653	v-maf musculoaponeurotic fibrosarcoma oncogene family, protein K (avian) [Source:MGI Symbol;Acc:MGI:99951]	protein_coding	1.30308	1.62487	1.83739
ENSMUSG00000018160	Med1	11	-	98152154	98193293	mediator complex subunit 1 [Source:MGI Symbol;Acc:MGI:1100846]	protein_coding	2.08986	2.04018	2.05696
ENSMUSG00000018166	Erbb3	10	-	128567523	128589652	erb-b2 receptor tyrosine kinase 3 [Source:MGI Symbol;Acc:MGI:95411]	protein_coding	1.08013	1.08719	1.08941
ENSMUSG00000018167	Stard3	11	+	98358368	98381112	START domain containing 3 [Source:MGI Symbol;Acc:MGI:1929618]	protein_coding	10.7799	10.8249	11.0497
ENSMUSG00000018168	Ikzf3	11	-	98464902	98546031	IKAROS family zinc finger 3 [Source:MGI Symbol;Acc:MGI:1342542]	protein_coding	-0.0518729	0.129822	0.266886
ENSMUSG00000018169	Mfng	15	-	78755882	78773475	MFNG O-fucosylpeptide 3-beta-N-acetylglucosaminyltransferase [Source:MGI Symbol;Acc:MGI:1095404]	protein_coding	2.74395	2.44105	2.36405
ENSMUSG00000018171	Vmp1	11	-	86583865	86683836	vacuole membrane protein 1 [Source:MGI Symbol;Acc:MGI:1923159]	protein_coding	14.3041	15.7936	16.4885
ENSMUSG00000018189	Uchl5	1	+	143777272	143807466	ubiquitin carboxyl-terminal esterase L5 [Source:MGI Symbol;Acc:MGI:1914848]	protein_coding	17.6942	17.6747	17.8807
ENSMUSG00000018196	Glrx2	1	+	143716338	143749676	glutaredoxin 2 (thioltransferase) [Source:MGI Symbol;Acc:MGI:1916617]	protein_coding	28.1994	26.3981	25.5917
ENSMUSG00000018199	Ro60	1	-	143750790	143777068	Ro60, Y RNA binding protein [Source:MGI Symbol;Acc:MGI:106652]	protein_coding	0.300162	0.281386	0.321061
ENSMUSG00000018209	Stk4	2	+	164070322	164155524	serine/threonine kinase 4 [Source:MGI Symbol;Acc:MGI:1929004]	protein_coding	28.0791	31.9781	34.3478
ENSMUSG00000018211	Wfdc15b	2	-	164214454	164221660	WAP four-disulfide core domain 15B [Source:MGI Symbol;Acc:MGI:2445041]	protein_coding	-0.0427555	0.00896736	0.0353805
ENSMUSG00000018217	Pmp22	11	+	63128982	63159547	peripheral myelin protein 22 [Source:MGI Symbol;Acc:MGI:97631]	protein_coding	5.36545	5.47131	5.53171
ENSMUSG00000018238	Gdf9	11	+	53431023	53437904	growth differentiation factor 9 [Source:MGI Symbol;Acc:MGI:95692]	protein_coding	1.63559	1.44417	1.43784
ENSMUSG00000018239	Zcchc10	11	+	53324679	53333301	zinc finger, CCHC domain containing 10 [Source:MGI Symbol;Acc:MGI:1196228]	protein_coding	2.04795	2.06179	2.07836
ENSMUSG00000018259	Prl8a2	13	+	27345673	27354216	prolactin family 8, subfamily a, member 2 [Source:MGI Symbol;Acc:MGI:894281]	protein_coding	0.0346699	0.050594	0.0615767
ENSMUSG00000018263	Tbx5	5	+	119832668	119885219	T-box 5 [Source:MGI Symbol;Acc:MGI:102541]	protein_coding	0.075387	-0.00115199	0.00511925
ENSMUSG00000018286	Psmb6	11	+	70525367	70527858	proteasome (prosome, macropain) subunit, beta type 6 [Source:MGI Symbol;Acc:MGI:104880]	protein_coding	581.172	589.07	585.875
ENSMUSG00000018287	Spag7	11	-	70663771	70669416	sperm associated antigen 7 [Source:MGI Symbol;Acc:MGI:107380]	protein_coding	30.9345	31.0905	31.5518
ENSMUSG00000018293	Pfn1	11	-	70651850	70654644	profilin 1 [Source:MGI Symbol;Acc:MGI:97549]	protein_coding	6084.58	5759.35	5554.04
ENSMUSG00000018322	Tomm34	2	-	164053540	164071169	translocase of outer mitochondrial membrane 34 [Source:MGI Symbol;Acc:MGI:1914395]	protein_coding	6.59169	7.53478	8.03127
ENSMUSG00000018326	Ywhab	2	+	163994960	164018588	tyrosine 3-monooxygenase/tryptophan 5-monooxygenase activation protein, beta polypeptide [Source:MGI Symbol;Acc:MGI:1891917]	protein_coding	45.8902	42.7734	41.206
ENSMUSG00000018334	Ksr1	11	-	79013440	79146407	kinase suppressor of ras 1 [Source:MGI Symbol;Acc:MGI:105051]	protein_coding	1.33704	1.27403	1.21457
ENSMUSG00000018339	Gpx3	11	+	54902453	54910377	glutathione peroxidase 3 [Source:MGI Symbol;Acc:MGI:105102]	protein_coding	4.15589	4.15631	4.06615
ENSMUSG00000018340	Anxa6	11	-	54979108	55033445	annexin A6 [Source:MGI Symbol;Acc:MGI:88255]	protein_coding	11.0861	10.6207	10.1684
ENSMUSG00000018341	Il12rb2	6	-	67291318	67376188	interleukin 12 receptor, beta 2 [Source:MGI Symbol;Acc:MGI:1270861]	protein_coding	0.129998	-0.0247543	-0.0925798
ENSMUSG00000018347	Zkscan6	11	+	65807175	65829239	zinc finger with KRAB and SCAN domains 6 [Source:MGI Symbol;Acc:MGI:1289293]	protein_coding	3.55862	3.67014	3.50873
ENSMUSG00000018362	Kpna2	11	-	106988629	106999541	karyopherin (importin) alpha 2 [Source:MGI Symbol;Acc:MGI:103561]	protein_coding	25.8047	26.9838	27.5495
ENSMUSG00000018363	Smurf2	11	-	106820066	106920715	SMAD specific E3 ubiquitin protein ligase 2 [Source:MGI Symbol;Acc:MGI:1913563]	protein_coding	0.423998	0.498705	0.503371
ENSMUSG00000018372	Cep95	11	+	106789252	106819930	centrosomal protein 95 [Source:MGI Symbol;Acc:MGI:2443502]	protein_coding	0.215142	0.22291	0.210788
ENSMUSG00000018377	Vezf1	11	+	88068279	88084729	vascular endothelial zinc finger 1 [Source:MGI Symbol;Acc:MGI:1313291]	protein_coding	2.49683	2.55222	2.54786
ENSMUSG00000018378	Cuedc1	11	+	88098058	88194140	CUE domain containing 1 [Source:MGI Symbol;Acc:MGI:2144281]	protein_coding	1.83041	1.72193	1.62089
ENSMUSG00000018379	Srsf1	11	+	88047373	88053755	serine and arginine-rich splicing factor 1 [Source:MGI Symbol;Acc:MGI:98283]	protein_coding	9.74425	9.38236	9.38301
ENSMUSG00000018381	Abi3	11	-	95830074	95842476	ABI gene family, member 3 [Source:MGI Symbol;Acc:MGI:1913860]	protein_coding	0.273363	0.294332	0.29469
ENSMUSG00000018387	Shroom1	11	+	53457205	53467766	shroom family member 1 [Source:MGI Symbol;Acc:MGI:1919024]	protein_coding	0.0671009	0.0521437	0.0469233
ENSMUSG00000018395	Kif3a	11	+	53567379	53601967	kinesin family member 3A [Source:MGI Symbol;Acc:MGI:107689]	protein_coding	0.328909	0.274574	0.263857
ENSMUSG00000018398	Septin8	11	+	53519257	53549565	septin 8 [Source:MGI Symbol;Acc:MGI:894310]	protein_coding	0.341612	0.363879	0.35424
ENSMUSG00000018401	Mtmr4	11	+	87592162	87616302	myotubularin related protein 4 [Source:MGI Symbol;Acc:MGI:2180699]	protein_coding	1.54189	1.56443	1.60038
ENSMUSG00000018405	Mrm1	11	-	84813061	84819515	mitochondrial rRNA methyltransferase 1 [Source:MGI Symbol;Acc:MGI:2443470]	protein_coding	1.14542	1.21394	1.24269
ENSMUSG00000018411	Mapt	11	+	104231390	104332090	microtubule-associated protein tau [Source:MGI Symbol;Acc:MGI:97180]	protein_coding	0.46243	0.40443	0.371688
ENSMUSG00000018412	Kansl1	11	-	104333229	104468861	KAT8 regulatory NSL complex subunit 1 [Source:MGI Symbol;Acc:MGI:1923969]	protein_coding	1.94141	1.6869	1.58807
ENSMUSG00000018415	Gid4	11	+	60417145	60450927	GID complex subunit 4, VID24 homolog [Source:MGI Symbol;Acc:MGI:1914021]	protein_coding	0.70568	0.634291	0.615725
ENSMUSG00000018417	Myo1b	1	-	51749765	51916071	myosin IB [Source:MGI Symbol;Acc:MGI:107752]	protein_coding	0.840504	0.936883	0.937179
ENSMUSG00000018425	Dhx40	11	-	86768846	86807746	DEAH (Asp-Glu-Ala-His) box polypeptide 40 [Source:MGI Symbol;Acc:MGI:1914737]	protein_coding	1.81617	2.1945	2.3723
ENSMUSG00000018427	Ypel2	11	-	86936425	86993707	yippee like 2 [Source:MGI Symbol;Acc:MGI:1925114]	protein_coding	1.78345	1.47758	1.32569
ENSMUSG00000018428	Akap1	11	-	88830792	88864586	A kinase (PRKA) anchor protein 1 [Source:MGI Symbol;Acc:MGI:104729]	protein_coding	0.589024	0.541701	0.515232
ENSMUSG00000018433	Nol11	11	-	107166663	107189381	nucleolar protein 11 [Source:MGI Symbol;Acc:MGI:1916229]	protein_coding	1.41689	1.31074	1.27496
ENSMUSG00000018442	Derl2	11	-	71007164	71019841	Der1-like domain family, member 2 [Source:MGI Symbol;Acc:MGI:2151483]	protein_coding	8.22822	7.68551	7.46679
ENSMUSG00000018446	C1qbp	11	-	70977836	70983026	complement component 1, q subcomponent binding protein [Source:MGI Symbol;Acc:MGI:1194505]	protein_coding	3.437	4.36145	4.88688
ENSMUSG00000018449	Rpain	11	+	70970213	70977833	RPA interacting protein [Source:MGI Symbol;Acc:MGI:1916973]	protein_coding	6.65903	6.83826	6.96146
ENSMUSG00000018451	6330403K07Rik	11	-	71031941	71033513	RIKEN cDNA 6330403K07 gene [Source:MGI Symbol;Acc:MGI:1918001]	protein_coding	0.41829	0.426326	0.42375
ENSMUSG00000018459	Slc13a3	2	-	165405028	165473230	solute carrier family 13 (sodium-dependent dicarboxylate transporter), member 3 [Source:MGI Symbol;Acc:MGI:2149635]	protein_coding	0.151972	0.0830704	0.0713047
ENSMUSG00000018470	Kcnab3	11	+	69326258	69333042	potassium voltage-gated channel, shaker-related subfamily, beta member 3 [Source:MGI Symbol;Acc:MGI:1336208]	protein_coding	0.0852471	0.100799	0.0919659
ENSMUSG00000018474	Chd3	11	-	69343273	69369406	chromodomain helicase DNA binding protein 3 [Source:MGI Symbol;Acc:MGI:1344395]	protein_coding	1.91621	1.82519	1.73267
ENSMUSG00000018476	Kdm6b	11	-	69398508	69413675	KDM1 lysine (K)-specific demethylase 6B [Source:MGI Symbol;Acc:MGI:2448492]	protein_coding	107.046	91.1594	84.6691
ENSMUSG00000018479	1700125H20Rik	11	+	85170404	85181145	RIKEN cDNA 1700125H20 gene [Source:MGI Symbol;Acc:MGI:1920884]	protein_coding	-0.00593415	0.00274701	0.00321374
ENSMUSG00000018481	Appbp2	11	-	85187262	85235130	amyloid beta precursor protein (cytoplasmic tail) binding protein 2 [Source:MGI Symbol;Acc:MGI:1914134]	protein_coding	5.42112	5.16516	5.12916
ENSMUSG00000018486	Wnt9b	11	-	103727364	103749821	wingless-type MMTV integration site family, member 9B [Source:MGI Symbol;Acc:MGI:1197020]	protein_coding	0.0406917	0.0204906	0.0203406
ENSMUSG00000018500	Adora2b	11	+	62248984	62266453	adenosine A2b receptor [Source:MGI Symbol;Acc:MGI:99403]	protein_coding	1.39726	1.35583	1.32762
ENSMUSG00000018501	Ncor1	11	-	62316426	62458541	nuclear receptor co-repressor 1 [Source:MGI Symbol;Acc:MGI:1349717]	protein_coding	61.1582	58.9614	57.862
ENSMUSG00000018507	Trpv2	11	+	62574486	62600515	transient receptor potential cation channel, subfamily V, member 2 [Source:MGI Symbol;Acc:MGI:1341836]	protein_coding	2.06289	1.95996	1.91789
ENSMUSG00000018509	Cenpv	11	-	62524946	62539261	centromere protein V [Source:MGI Symbol;Acc:MGI:1920389]	protein_coding	4.26029	4.0318	4.2
ENSMUSG00000018537	Pcgf2	11	-	97688823	97700497	polycomb group ring finger 2 [Source:MGI Symbol;Acc:MGI:99161]	protein_coding	0.395546	0.376271	0.360288
ENSMUSG00000018541	Cwc25	11	-	97745481	97766556	CWC25 spliceosome-associated protein [Source:MGI Symbol;Acc:MGI:1914730]	protein_coding	6.06487	6.32013	6.4716
ENSMUSG00000018543	1700001P01Rik	11	-	97771481	97775918	RIKEN cDNA 1700001P01 gene [Source:MGI Symbol;Acc:MGI:1919465]	protein_coding	-0.018138	0.00335028	0.0150723
ENSMUSG00000018547	Pip4k2b	11	-	97715157	97744704	phosphatidylinositol-5-phosphate 4-kinase, type II, beta [Source:MGI Symbol;Acc:MGI:1934234]	protein_coding	0.213596	0.243631	0.249995
ENSMUSG00000018548	Trim37	11	+	87127077	87220683	tripartite motif-containing 37 [Source:MGI Symbol;Acc:MGI:2153072]	protein_coding	6.46539	6.6219	6.57311
ENSMUSG00000018554	Ybx2	11	+	69935796	69941605	Y box protein 2 [Source:MGI Symbol;Acc:MGI:1096372]	protein_coding	0.330492	0.270632	0.248031
ENSMUSG00000018559	Ctdnep1	11	+	69981156	69990601	CTD nuclear envelope phosphatase 1 [Source:MGI Symbol;Acc:MGI:1914431]	protein_coding	2.61815	2.53846	2.49934
ENSMUSG00000018565	Elp5	11	-	69968222	69982517	elongator acetyltransferase complex subunit 5 [Source:MGI Symbol;Acc:MGI:1859017]	protein_coding	15.2191	15.5156	15.6918
ENSMUSG00000018566	Slc2a4	11	-	69942539	69948188	solute carrier family 2 (facilitated glucose transporter), member 4 [Source:MGI Symbol;Acc:MGI:95758]	protein_coding	0.198218	0.171419	0.156794
ENSMUSG00000018567	Gabarap	11	+	69991143	69994951	gamma-aminobutyric acid receptor associated protein [Source:MGI Symbol;Acc:MGI:1861742]	protein_coding	252.036	283.14	296.884
ENSMUSG00000018569	Cldn7	11	+	69964779	69967885	claudin 7 [Source:MGI Symbol;Acc:MGI:1859285]	protein_coding	4.4471	4.22715	4.08255
ENSMUSG00000018570	2810408A11Rik	11	-	69897352	69900987	RIKEN cDNA 2810408A11 gene [Source:MGI Symbol;Acc:MGI:1917669]	protein_coding	0.186448	0.152515	0.166173
ENSMUSG00000018572	Phf23	11	+	69995777	70000009	PHD finger protein 23 [Source:MGI Symbol;Acc:MGI:1925496]	protein_coding	6.57569	7.53842	8.05934
ENSMUSG00000018574	Acadvl	11	-	70010183	70015411	acyl-Coenzyme A dehydrogenase, very long chain [Source:MGI Symbol;Acc:MGI:895149]	protein_coding	20.6732	23.4316	23.8012
ENSMUSG00000018581	Dnah11	12	-	117877982	118199043	dynein, axonemal, heavy chain 11 [Source:MGI Symbol;Acc:MGI:1100864]	protein_coding	0.0565485	0.0483425	0.0528778
ENSMUSG00000018583	G3bp1	11	+	55469685	55504838	GTPase activating protein (SH3 domain) binding protein 1 [Source:MGI Symbol;Acc:MGI:1351465]	protein_coding	14.2765	16.3627	17.4576
ENSMUSG00000018585	Atox1	11	-	55446641	55461239	antioxidant 1 copper chaperone [Source:MGI Symbol;Acc:MGI:1333855]	protein_coding	224.717	184.996	169.016
ENSMUSG00000018589	Glra2	X	-	165129017	165327393	glycine receptor, alpha 2 subunit [Source:MGI Symbol;Acc:MGI:95748]	protein_coding	0.0147883	0.02289	0.0158372
ENSMUSG00000018593	Sparc	11	-	55394500	55423183	secreted acidic cysteine rich glycoprotein [Source:MGI Symbol;Acc:MGI:98373]	protein_coding	3.02425	3.02408	2.95902
ENSMUSG00000018595	Glra4	X	-	136757674	136780141	glycine receptor, alpha 4 subunit [Source:MGI Symbol;Acc:MGI:95750]	protein_coding	0.0203048	0.0305445	0.0353472
ENSMUSG00000018599	Mief2	11	+	60728398	60732951	mitochondrial elongation factor 2 [Source:MGI Symbol;Acc:MGI:2144199]	protein_coding	0.274213	0.257728	0.263655
ENSMUSG00000018604	Tbx3	5	+	119670669	119684724	T-box 3 [Source:MGI Symbol;Acc:MGI:98495]	protein_coding	1.20001	1.08198	1.05085
ENSMUSG00000018620	Mmp20	9	+	7628231	7674979	matrix metallopeptidase 20 (enamelysin) [Source:MGI Symbol;Acc:MGI:1353466]	protein_coding	-0.0239512	0.00546986	0.0189653
ENSMUSG00000018623	Mmp7	9	+	7692090	7699585	matrix metallopeptidase 7 [Source:MGI Symbol;Acc:MGI:103189]	protein_coding	0.0383287	0.0679179	0.0808425
ENSMUSG00000018634	Crhr1	11	+	104132855	104175523	corticotropin releasing hormone receptor 1 [Source:MGI Symbol;Acc:MGI:88498]	protein_coding	0.0362621	0.0673642	0.0829029
ENSMUSG00000018648	Dusp14	11	-	84048041	84069261	dual specificity phosphatase 14 [Source:MGI Symbol;Acc:MGI:1927168]	protein_coding	0.283313	0.253739	0.257752
ENSMUSG00000018651	Tada2a	11	-	84078920	84129600	transcriptional adaptor 2A [Source:MGI Symbol;Acc:MGI:2144471]	protein_coding	0.0245829	0.067292	0.0828902
ENSMUSG00000018654	Ikzf1	11	+	11685003	11772926	IKAROS family zinc finger 1 [Source:MGI Symbol;Acc:MGI:1342540]	protein_coding	7.73631	9.07879	9.79184
ENSMUSG00000018656	Tcaf3	6	-	42584866	42597692	TRPM8 channel-associated factor 3 [Source:MGI Symbol;Acc:MGI:3042585]	protein_coding	0.0138121	0.0165488	0.011656
ENSMUSG00000018659	Pnpo	11	-	96937825	96943986	pyridoxine 5'-phosphate oxidase [Source:MGI Symbol;Acc:MGI:2144151]	protein_coding	2.29962	1.90332	1.74186
ENSMUSG00000018661	Cog1	11	+	113649169	113667054	component of oligomeric golgi complex 1 [Source:MGI Symbol;Acc:MGI:1333873]	protein_coding	0.862543	0.959979	0.966391
ENSMUSG00000018666	Cbx1	11	+	96789127	96808640	chromobox 1 [Source:MGI Symbol;Acc:MGI:105369]	protein_coding	4.52407	4.88716	5.01673
ENSMUSG00000018669	Cdk5rap3	11	-	96907426	96916496	CDK5 regulatory subunit associated protein 3 [Source:MGI Symbol;Acc:MGI:1933126]	protein_coding	4.8873	4.67921	4.5829
ENSMUSG00000018672	Copz2	11	+	96849870	96861203	coatomer protein complex, subunit zeta 2 [Source:MGI Symbol;Acc:MGI:1929008]	protein_coding	2.11807	1.3895	1.17517
ENSMUSG00000018677	Slc25a39	11	-	102402985	102407946	solute carrier family 25, member 39 [Source:MGI Symbol;Acc:MGI:1196386]	protein_coding	14.746	15.2783	15.4285
ENSMUSG00000018678	Sp2	11	-	96953341	96982959	Sp2 transcription factor [Source:MGI Symbol;Acc:MGI:1926162]	protein_coding	0.632375	0.756663	0.808662
ENSMUSG00000018697	Aatf	11	-	84422855	84513522	apoptosis antagonizing transcription factor [Source:MGI Symbol;Acc:MGI:1929608]	protein_coding	0.321338	0.344554	0.385478
ENSMUSG00000018698	Lhx1	11	-	84518284	84525535	LIM homeobox protein 1 [Source:MGI Symbol;Acc:MGI:99783]	protein_coding	0.068623	0.0338503	0.0305714
ENSMUSG00000018707	Dync1h1	12	+	110601452	110666945	dynein cytoplasmic 1 heavy chain 1 [Source:MGI Symbol;Acc:MGI:103147]	protein_coding	4.79148	4.48725	4.37474
ENSMUSG00000018727	Cpsf4l	11	-	113698172	113710017	cleavage and polyadenylation specific factor 4-like [Source:MGI Symbol;Acc:MGI:1277182]	protein_coding	0.406328	0.363465	0.367149
ENSMUSG00000018733	Pex12	11	-	83294642	83302586	peroxisomal biogenesis factor 12 [Source:MGI Symbol;Acc:MGI:2144177]	protein_coding	0.282418	0.296317	0.294975
ENSMUSG00000018736	Ndel1	11	-	68821434	68871858	nudE neurodevelopment protein 1 like 1 [Source:MGI Symbol;Acc:MGI:1932915]	protein_coding	11.8202	12.3637	12.6081
ENSMUSG00000018740	Slc25a35	11	+	68968131	68974365	solute carrier family 25, member 35 [Source:MGI Symbol;Acc:MGI:1919248]	protein_coding	1.82005	1.59793	1.63069
ENSMUSG00000018750	Zbtb4	11	+	69765912	69784023	zinc finger and BTB domain containing 4 [Source:MGI Symbol;Acc:MGI:1922830]	protein_coding	0.191212	0.151117	0.146554
ENSMUSG00000018752	Tnfsfm13	11	-	69682577	69696098	tumor necrosis factor (ligand) superfamily, membrane-bound member 13 [Source:MGI Symbol;Acc:MGI:3845075]	protein_coding	6.52037	5.99818	5.86973
ENSMUSG00000018761	Mpdu1	11	-	69656697	69662642	mannose-P-dolichol utilization defect 1 [Source:MGI Symbol;Acc:MGI:1346040]	protein_coding	1.94168	1.89966	1.90417
ENSMUSG00000018765	Fxr2	11	+	69632990	69653297	fragile X mental retardation, autosomal homolog 2 [Source:MGI Symbol;Acc:MGI:1346074]	protein_coding	1.2451	1.24274	1.25187
ENSMUSG00000018770	Atp5g3	2	-	73908447	73911326	ATP synthase, H+ transporting, mitochondrial F0 complex, subunit C3 (subunit 9) [Source:MGI Symbol;Acc:MGI:2442035]	protein_coding	185.267	202.555	211.264
ENSMUSG00000018774	Cd68	11	-	69664213	69666153	CD68 antigen [Source:MGI Symbol;Acc:MGI:88342]	protein_coding	5.95097	6.14297	6.31967
ENSMUSG00000018776	Slc35g3	11	-	69759890	69761968	solute carrier family 35, member G3 [Source:MGI Symbol;Acc:MGI:1927128]	protein_coding	-0.00368662	0.088451	0.131405
ENSMUSG00000018796	Acsl1	8	+	46471037	46536051	acyl-CoA synthetase long-chain family member 1 [Source:MGI Symbol;Acc:MGI:102797]	protein_coding	76.9492	76.2811	75.9213
ENSMUSG00000018800	Abca5	11	-	110269369	110337716	ATP-binding cassette, sub-family A (ABC1), member 5 [Source:MGI Symbol;Acc:MGI:2386607]	protein_coding	0.15502	0.147137	0.13281
ENSMUSG00000018809	Smyd4	11	+	75348433	75405705	SET and MYND domain containing 4 [Source:MGI Symbol;Acc:MGI:2442796]	protein_coding	0.241559	0.330569	0.319803
ENSMUSG00000018819	Lsp1	7	+	142460809	142494867	lymphocyte specific 1 [Source:MGI Symbol;Acc:MGI:96832]	protein_coding	104.854	104.675	105.783
[truncated: 40,338 more rows]
