# Supplementary material for: Partial differentiation induction of leukemia cells co-opts NK cells to erode leukemic stemness
Source: Research Square preprint supplement (doi:10.21203/rs.3.rs-8399393/v1), 2026-01-16
Supplement: Supplementary file 6 [file a13210ff6f876f00b1d900ac.xlsx]

## Sheet: Primers
Table S8: Primers used for RT-PCR
Gene	Primers
Mouse Irf8	F:AAGCAGGATTACAATCAGGAGGT R:TCGGGGACAATTCGGTAAACT
Mouse Pu.1	F:TTACAGGCGTGCAAAATGGAA R:GACGTTGGTATAGCTCTGAATCG
Mouse c-Myb	F:AGACCCCGACACAGCATCTA R:CAGCAGCCCATCGTAGTCAT
Mouse Klf4	F:GGCGAGTCTGACATGGCTG R:GCTGGACGCAGTGTCTTCTC
Mouse Tlr7	F:ATGTGGACACGGAAGAGACAA R:ACCATCGAAACCCAAAGACTC
Mouse Irf7	F:CCCCAGCCGGTGATCTTTC R:CACAGTGACGGTCCTCGAAG
Mouse Id2	F:TCCGGTGAGGTCCGTTAGG R:CAGACTCATCGGGTCGTCC
Mouse Gfi-1	F:CCCTTTGCGTGCGAGATGT R:CACTGCCTTGTGTTGCTCCA
Mouse Cebpε	F:GCAGCCACTTGAGTTCTCAGG R:GATGTAGGCGGAGAGGTCGAT
Mouse M-Csfr	F:AAGAAACGCGACCTTCAAAAAC R:CAAGAGTGGGCCGGATCTTT
Mouse Ela2	F:CCCATCACAACTGCTGAACGA R:CGGAGCCATTGAGCTGGATAA
Mouse Gapdh	F:AGGTTGTCTCCTGCGACTTCA R:GGTCCACCACCCTGTTGCT
Mouse PML/RARa	F: GCTGCCGTGCGCACCGAT R:GGGGCTAGGCGGTCCATC
Mouse Nr4a1	F:CTTCGGCGTCCTTCAAGTTTG R:GGCTGGAAGTTGGGTGATGA
Mouse Tgm2	F: GCTGGACCAACAGGACAATGT R:CTCTAGGCTGAGACGGTACAG
Mouse Itgb2	F:AGGAGCATCGCTAATCCTGAG R:CCTGGTCGCAAGTAAAGTGTC
Mouse G-Csfr	F:TGCACCCTGACTGGAGTTAC R:TGAAATCTCGATGTGTCCACAG
Mouse Hck	F:TCGTTGTCTGTTCGAGACTTTG R:TCTTGTAGTGGAGCACGAGTT
Mouse Pram1	F: GGACTTCCGAAACCTCCAAGC R:CTGCTCACTTAACTCAGTCTGTG
Mouse Egr1	F:TCGGCTCCTTTCCTCACTCA R:CTCATAGGGTTGTTCGCTCGG
Human Parp1	F:CGGAGTCTTCGGATAAGCTCT R:TTTCCATCAAACATGGGCGAC
