# Supplementary material for: Partial differentiation induction of leukemia cells co-opts NK cells to erode leukemic stemness
Source: Research Square preprint supplement (doi:10.21203/rs.3.rs-8399393/v1), 2026-01-16
Supplement: Supplementary file 7 [file d388eb78a1236119df25daf6.xlsx]

## Sheet: Sheet1
Table S6:Nomenclature and markers for non-malignant clusters
Cluster	Markers	Description
C01-DC01	CD45+, CD11cint, CD11bint, MHCⅡhi, MHCⅠhi , B220int , CCR6int , Ly6Cint , CD4+, PD-L1hi, FOXP3lo	CD4+PD-L1hi plasmacytoid dendritic cells (pDCs)
C02-DC02	CD45+, CD11chi, CD11bint, MHCⅡint, MHCⅠhi , B220lo , CCR6int, Ly6Cint , PD-L1int , Ki-67int , FOXP3lo	PD-L1int plasmacytoid dendritic cells (pDCs)
C03-DC03	CD45+, CD11clo, CD11blo, MHCⅡint, MHCⅠint , B220lo, CCR6lo , Ly6Clo , PD-L1lo, Ki-67lo , FOXP3-	PD-L1lo plasmacytoid dendritic cells (pDCs)
C04-DC04	CD45+, CD11chi, CD11bhi, MHCⅡlo, MHCⅠhi, CD206lo, CCR6hi, Ly6Clo, Ki-67lo , PD-L1hi	Conventional dendritic cells (cDCs)
C05-T01	CD45+, CD3e+, TCRγδ+, CD27hi, CD62L+, CD127hi, CD95+	Central memory γδ T cells
C06-UD01	CD45+, MHCⅡ- , MHCⅠ+, CD107a+ , Ki-67+ , CD27hi , CD62L+ , PD-L1+ , CD69+	Undefined
C07-UD02	CD45+, MHCⅡlo , MHCⅠ+, CD11b+ , Ki-67+	Undefined
C08-Mφ01	CD45+, MHC Ⅱlo, MHCⅠ+, F4/80+, CD206hi, FOXP3hi, CD107ahi , TIM-3+	CD206hiFOXP3hi M2 macrophages
C09-NKT	CD45+, MHCⅡlo , MHC Ⅰ+, F4/80+, CD206int, FOXP3int, TIM-3+, CD57hi, NK1.1+, TCRβ+, CTLA-4hi, PD-1+	NKT
C10-Mφ02	CD45+, MHC Ⅱlo, MHC Ⅰ+, F4/80+, CD206lo, CD107ahi , FOXP3lo	CD206loFOXP3lo M2 macrophages
C11-Mono01	CD45+, MHCⅡlo, MHCⅠ+, CD11b+, Ly6Chi, Ly6G-, CD107ahi , CCR4lo, CCR6hi, PD-1- , CD86int	CCR4loCD86int classical monocytes
C12-Mono02	CD45+, MHCⅡlo, MHCⅠ+, CD11b+, Ly6Chi, Ly6Glo, CD107ahi ,CCR4hi, CCR6hi, PD-1- , CD86lo	CCR4hiCD86lo classical monocytes
C13-M-MDSC-L	CD45+, MHCⅡlo, MHCⅠ+, CD11b+, Ly6Chi, Ly6Glo,CD107ahi , CCR4hi, CCR6hi, PD-1hi , CD86hi	CCR4hiPD-1hiCD86hi monocytic MDSCs-like
C14-Neu01	CD45+, MHC Ⅱhi, MHCⅠ+, CD11b+, F4/80+, CD206hi, Ly6Ghi, Ly6Cint, CD107ahi , FOXP3lo, TIM-3+	MHCⅡhi APC-like Neutrophils
C15-Neu02	CD45+, MHC Ⅱlo, MHCⅠ+, CD11b+, Ly6Clo, Ly6Ghi, CD107alo, CD62L-, FOXP3lo , TIM-3lo	CD62L-TIM-3lo neutrophils
C16-Neu03	CD45+, MHCⅡ-, MHCⅠ-, CD11b+, Ly6Clo, Ly6Ghi, CD206- , CD107aint, CD62Lint , FOXP3- , TIM-3-	CD62LintTIM-3- neutrophils
C17-NK01	CD45+, NK1.1+, CD11bhi, CD62Lhi	CD62Lhi NK cell
C18-Neu04	CD45+, MHCⅡlo, MHCⅠ+, CD11b+, Ly6Clo, Ly6Ghi, CD206lo ,CD107aint, CD62Lhi , TIM-3hi	CD62LhiTIM-3int neutrophils
C19-Neu05	CD45+, MHCⅡ-, MHCⅠ-, CD11b+, Ly6Clo, Ly6Gint, CD107aint, CD62L- , TIM-3- , PD-L1-	PD-L1-CD62L-TIM-3- neutrophils
C20-PMN-MDSC-L01	CD45+, MHCⅡlo, MHCⅠlo, CD11b+, Ly6Clo, Ly6Gint, CD107aint, CD62L-, TIM-3- , PD-L1hi	PD-L1hi polymorphonuclear MDSCs-like
C21-Neu06	CD45+, MHCⅡlo, MHCⅠlo, CD11b+, Ly6Clo, Ly6Gint, CD107aint, CD62L-, TIM-3lo ,CD57hi	CD57hi neutrophils
C22-Mono03	CD45+, MHCⅡ-, MHCⅠlo, CD11b+, Ly6Clo, Ly6Gint, CD107aint, CD62L-, TIM-3- , CD115hi	Non-classical monocytes
C23-Neu07	CD45+, MHCⅡlo, MHCⅠ+, CD11b+, Ly6Clo, Ly6Glo, CD107aint, CD62L-, TIM-3- , CD103hi, CD206-	CD103hiTIM-3-CD206- neutrophils
C24-Neu08	CD45+, MHC Ⅱlo, MHCⅠ+, CD11b+, Ly6Clo, Ly6Gint, CD107aint, CD62L-, TIM-3lo , CD127hi	CD127hi neutrophils
C25-Neu09	CD45+, MHC Ⅱ-, MHCⅠlo, CD11b+, Ly6Clo, Ly6Ghi, CD107aint, CD62Llo,TIM-3lo , CD95hi	CD95hi neutrophils
C26-PMN-MDSC-L02	CD45+, MHC Ⅱ-, MHCⅠlo, CD11b+, Ly6Clo, Ly6Ghi, CD107aint, CD62L-, CCR6lo, PD-1-, TIM-3hi	CCR6loTIM-3hi polymorphonuclear MDSCs-like
C27-Neu10	CD45+, MHC Ⅱlo, MHCⅠ+, CD11b+, Ly6Clo, Ly6Ghi, CD107ahi, CD62L-, CXCR3hi, TIM-3int	CXCR3hiTIM-3int neutrophils
C28-PMN-MDSC-L03	CD45+, MHCⅡlo, MHCⅠ+, CD11b+, Ly6Clo, Ly6Ghi, CD107ahi, CD62Llo, PD-1hi, TIM-3hi	PD-1hiTIM-3hi polymorphonuclear MDSCs-like
C29-PMN-MDSC-L04	CD45+, MHC Ⅱlo, MHCⅠ+, CD11b+, Ly6Clo, Ly6Ghi, CD107ahi, CD62L-, CCR6hi, PD-1-, TIM-3hi	CCR6hiTIM-3hi polymorphonuclear MDSCs-like
C30-PMN-MDSC-L05	CD45+, MHC Ⅱlo, MHCⅠ+, CD11b+, Ly6Clo, Ly6Ghi, CD107aint, CD62L-, PD-1hi, TIM-3-	PD-1hiTIM-3- polymorphonuclear MDSCs-like
C31-Neu11	CD45+, MHC Ⅱlo, MHCⅠ+, CD11b+, Ly6Clo, Ly6Gint, CD107aint, CD62L-, CXCR3hi, TIM-3-	CXCR3hiTIM-3- neutrophils
C32-Neu12	CD45+, MHCⅡlo, MHCⅠ+, CD11b+, Ly6Clo, Ly6Gint, CD107aint, CD62Llo, TIM-3lo , CD4+	CD4+ neutrophils
C33-Neu13	CD45+, MHCⅡlo, MHCⅠ+, CD11b+, Ly6Clo, Ly6Ghi, CD107aint, CD62L-, TIM-3lo , CD86hi	CD86hi neutrophils
C34-Neu14	CD45+, MHCⅡ-, MHCⅠ+, CD11b+, Ly6Clo, Ly6Ghi, CD107ahi, CD62Llo, TIM-3int , CD115hi	CD115hi neutrophils
C35-Neu15	CD45+, MHCⅡlo, MHCⅠ+, CD11b+, Ly6Clo, Ly6Ghi, CD107aint, CD62Llo, TIM-3lo , CD69hi	CD69hi neutrophils
C36-Neu16	CD45+, MHCⅡlo, MHCⅠ+, CD11b+, Ly6Clo, Ly6Ghi, CD107aint , CD62Llo , TIM-3lo , KLRG1hi	KLRG1hi neutrophils
C37-NK02	CD45+, NK1.1+, CD11bhi, CD62L-	CD62L- NK cell
C38-PMN-MDSC-L06	CD45+, MHC Ⅱlo, MHCⅠ+, CD11b+, Ly6Clo, Ly6Ghi, CD107aint , CD62Llo , TIM-3lo , CD25+	CD25+ polymorphonuclear MDSCs-like
C39-Neu17	CD45+, MHC Ⅱlo , MHCⅠ+, CD11b+, Ly6Clo, Ly6Ghi, CD107ahi, CD62Llo , TIM-3lo ,CD103hi, CD206lo	CD103hiTIM-3loCD206lo neutrophils
C40-UD03	CD45+, MHC Ⅱlo, MHCⅠ+, CD11b+, Ly6Clo, Ly6Ghi, CD107aint , CD62Llo, TCRγδ+	Undefined
C41-UD04	CD45+, MHC Ⅱlo, MHCⅠ+, CD11b+, Ly6Clo, Ly6Ghi, CD107aint, CD62Llo, TIM-3lo , CD8+	Undefined
C42-PMN-MDSC-L07	CD45+, MHC Ⅱlo, MHCⅠ+, CD11b+, Ly6Clo, Ly6Ghi, CD107aint , CD62Llo , TIM-3lo , CTLA-4+	CTLA-4+ polymorphonuclear MDSCs-like
C43-Neu18	CD45+, MHC Ⅱlo, MHCⅠ+, CD11b+, Ly6Clo, Ly6Ghi, CD107aint, TIM-3lo , CD62L- , CCR6hi	CCR6hiCD62L-FOXP3- neutrophils
C44-T02	CD45+, CD3+, TCRγδ-, TCRβ+, CD4+ , CD27+ , CD127+	CD4+ T cell
C45-B01	CD45+, MHCⅡhi, B220hi , LY6C-, LY6G- , CCR6-, PD-L1lo , CD62L-	CD62L-PD-L1loCCR6- B cell
C46-B02	CD45+, MHCⅡhi,B220hi, LY6C- , LY6G+ , CCR6+, PD-L1hi , CD62L+	CD62L+PD-L1hiCCR6+ B cell
