# Supplementary material for: Partial differentiation induction of leukemia cells co-opts NK cells to erode leukemic stemness
Source: Research Square preprint supplement (doi:10.21203/rs.3.rs-8399393/v1), 2026-01-16
Supplement: Supplementary file 8 [file ddbf37b7a29c7b1e819cb861.xlsx]

## Sheet: Gene
Table S7:Gene expression of NK subsets
GeneID	GeneName	Chr	Strand	Start	End	Annotation	Class	RA-C7L-NK01-1	RA-C7L-NK01-2	RA-C7L-NK01-3	RA-C7L-NK02-1	RA-C7L-NK02-2	RA-C7L-NK02-3	WT-NK01-1	WT-NK01-2	WT-NK01-3	WT-NK02-1	WT-NK02-2	WT-NK02-3	RA-C6L-NK01-1	RA-C6L-NK01-2	RA-C6L-NK01-3	RA-C6L-NK02-1	RA-C6L-NK02-2	RA-C6L-NK02-3
ENSMUSG00000000001	Gnai3	3	-	108107280	108146146	guanine nucleotide binding protein (G protein), alpha inhibiting 3 [Source:MGI Symbol;Acc:MGI:95773]	protein_coding	34.7612	2.27173	8.32036	83.3088	26.0503	7.30386	21.5191	140.438	14.5193	71.5056	6.82771	10.1342	96.2786	37.2293	77.5487	12.5476	3.96533	16.0128
ENSMUSG00000000003	Pbsn	X	-	77837901	77853623	probasin [Source:MGI Symbol;Acc:MGI:1860484]	protein_coding	0.0581947	-0.0636821	0.00927867	0.148091	0.0883061	-0.199664	0.174745	0.522058	0.147956	0.166779	1.15567	2.71348	0.00427088	-0.00217323	-0.00208402	-0.291939	0.144655	0.233829
ENSMUSG00000000028	Cdc45	16	-	18780447	18811987	cell division cycle 45 [Source:MGI Symbol;Acc:MGI:1338073]	protein_coding	3.39653	6.06947	3.58167	28.8806	3.32506	7.35871	21.0598	1.8751	0.764552	4.65189	6.37358	7.19695	23.0314	16.98	22.6279	2.43397	1.80807	-0.121168
ENSMUSG00000000031	H19	7	-	142575529	142578143	H19, imprinted maternally expressed transcript [Source:MGI Symbol;Acc:MGI:95891]	lincRNA	0.26673	-0.0640973	0.974583	0.733534	0.795188	0.783589	0.730306	0.262626	0.463861	13.0588	17.0691	6.63942	3.53173	0.551712	1.42995	1.22014	0.780603	0.236304
ENSMUSG00000000037	Scml2	X	+	161082525	161258213	Scm polycomb group protein like 2 [Source:MGI Symbol;Acc:MGI:1340042]	protein_coding	0.28497	3.84682	0.684067	0.639295	0.895605	0.425887	0.0915014	-0.218093	0.352385	1.90252	2.76861	3.04506	10.174	0.91726	0.645	-0.305024	0.268562	0.134275
ENSMUSG00000000049	Apoh	11	+	108343354	108414396	apolipoprotein H [Source:MGI Symbol;Acc:MGI:88058]	protein_coding	0.3342	-0.0569573	-0.205219	0.864315	0.122837	1.14201	0.143677	2.65805	0.438693	5.9954	4.39582	5.11708	0.0230193	-0.0173337	-0.0052587	-0.381803	1.03009	0.206892
ENSMUSG00000000056	Narf	11	+	121237253	121255856	nuclear prelamin A recognition factor [Source:MGI Symbol;Acc:MGI:1914858]	protein_coding	10.5892	2.57981	5.32772	7.01043	12.4912	0.951755	0.578189	0.86988	0.324914	5.03391	4.3485	4.4913	11.4602	5.16809	5.37357	1.01705	0.93849	1.12939
ENSMUSG00000000058	Cav2	6	+	17281185	17289115	caveolin 2 [Source:MGI Symbol;Acc:MGI:107571]	protein_coding	1.34946	0.936696	5.53036	0.869234	0.139839	0.760768	0.0599509	0.868029	1.33727	4.43565	7.38682	2.31444	1.95051	2.75014	1.34171	1.49988	2.35782	0.030649
ENSMUSG00000000078	Klf6	13	+	5861482	5870394	Kruppel-like factor 6 [Source:MGI Symbol;Acc:MGI:1346318]	protein_coding	33.0874	13.2952	31.4914	130.418	42.3437	22.6644	29.6977	1.84477	7.94522	4.90145	14.1249	24.804	28.6348	15.0991	23.1844	15.713	14.2176	3.381
ENSMUSG00000000085	Scmh1	4	+	120405281	120530186	sex comb on midleg homolog 1 [Source:MGI Symbol;Acc:MGI:1352762]	protein_coding	22.844	5.59745	2.31548	0.88241	1.54376	3.79745	15.4621	3.4855	0.621404	6.46888	18.33	6.34284	2.39104	2.6002	1.00936	4.27072	1.20894	5.76777
ENSMUSG00000000088	Cox5a	9	+	57521274	57532426	cytochrome c oxidase subunit 5A [Source:MGI Symbol;Acc:MGI:88474]	protein_coding	116.931	16.0057	24.8294	450.789	84.7783	105.954	149.024	97.9375	3.91292	8.88001	25.9289	54.6411	1018.12	985.385	930.144	14.2393	321.744	20.5236
ENSMUSG00000000093	Tbx2	11	+	85832551	85841948	T-box 2 [Source:MGI Symbol;Acc:MGI:98494]	protein_coding	0.31723	0.396219	0.385973	0.256212	0.32801	0.0629158	0.0879574	0.516663	0.385182	1.85443	2.67028	3.8453	0.0220538	-0.0169734	-0.00468405	-0.314551	0.289874	0.182117
ENSMUSG00000000094	Tbx4	11	+	85886422	85916097	T-box 4 [Source:MGI Symbol;Acc:MGI:102556]	protein_coding	0.38627	-0.0461058	0.727282	0.314175	0.682751	0.254194	0.110008	0.20002	0.474674	1.79854	2.30451	1.76562	0.0261891	-0.0200481	-0.00558453	0.370898	0.652881	0.24233
ENSMUSG00000000120	Ngfr	11	-	95568818	95587735	nerve growth factor receptor (TNFR superfamily, member 16) [Source:MGI Symbol;Acc:MGI:97323]	protein_coding	2.09201	-0.0813118	0.666854	0.44356	0.108926	0.858958	0.232296	0.220752	0.154944	1.91553	2.67564	2.79834	0.0960704	-0.000621811	-0.00220733	-0.34337	0.161744	0.420458
ENSMUSG00000000125	Wnt3	11	+	103774150	103817957	wingless-type MMTV integration site family, member 3 [Source:MGI Symbol;Acc:MGI:98955]	protein_coding	0.067495	1.49512	0.0810452	0.754492	0.498287	0.404979	0.423126	0.0617034	0.459164	1.81195	4.37813	2.83247	0.00468066	-0.000957306	-0.00370509	1.08797	0.403397	0.760323
ENSMUSG00000000126	Wnt9a	11	+	59306928	59333552	wingless-type MMTV integration site family, member 9A [Source:MGI Symbol;Acc:MGI:2446084]	protein_coding	0.281816	-0.0408809	-0.00365159	0.465031	0.453475	0.444857	0.169325	0.229174	0.491582	1.60871	2.66081	2.31508	0.152162	0.0594301	0.0307692	-0.311799	0.514891	0.2859
ENSMUSG00000000127	Fer	17	+	63863062	64139496	fer (fms/fps related) protein kinase [Source:MGI Symbol;Acc:MGI:105917]	protein_coding	0.846558	7.27453	2.09764	0.809385	1.3639	0.971374	-0.0154137	0.100668	1.31744	30.7605	5.85401	3.84843	0.239147	0.560036	-0.00856933	0.581374	1.28676	0.189037
ENSMUSG00000000131	Xpo6	7	-	126101715	126200501	exportin 6 [Source:MGI Symbol;Acc:MGI:2429950]	protein_coding	4.68314	3.65215	16.8024	0.890538	3.65275	4.02305	6.8634	1.35416	12.8812	8.30853	5.25819	9.17019	10.4038	9.98337	41.4355	3.39531	0.859225	2.63847
ENSMUSG00000000134	Tfe3	X	+	7762560	7775202	transcription factor E3 [Source:MGI Symbol;Acc:MGI:98511]	protein_coding	4.05347	2.50331	1.90994	0.73518	3.27453	2.24478	0.216393	0.047978	0.856378	4.38251	7.51414	2.75703	2.26752	7.36883	1.71741	4.97247	0.991552	5.20802
ENSMUSG00000000142	Axin2	11	+	108920349	108950783	axin 2 [Source:MGI Symbol;Acc:MGI:1270862]	protein_coding	0.329626	1.24537	0.514522	1.09519	0.600152	0.957024	0.318355	1.13447	0.524527	2.58805	5.29864	5.03539	0.0226078	0.330673	-0.00587249	-0.471343	0.513001	0.3469
ENSMUSG00000000148	Brat1	5	+	140705011	140719379	BRCA1-associated ATM activator 1 [Source:MGI Symbol;Acc:MGI:1891679]	protein_coding	1.73545	4.48954	1.96819	0.789594	1.26493	3.95674	3.99223	2.2567	1.03426	1.44107	1.85306	4.96215	0.291692	0.0314908	1.50552	0.428717	0.698403	0.278596
ENSMUSG00000000149	Gna12	5	-	140758408	140830431	guanine nucleotide binding protein, alpha 12 [Source:MGI Symbol;Acc:MGI:95767]	protein_coding	1.9583	4.13618	2.16626	1.248	3.87544	2.56849	-0.36221	1.22454	1.75178	42.0061	2.75747	5.39233	11.3348	8.01638	8.29281	0.748611	1.18518	3.08011
ENSMUSG00000000154	Slc22a18	7	+	143473736	143499334	solute carrier family 22 (organic cation transporter), member 18 [Source:MGI Symbol;Acc:MGI:1336884]	protein_coding	0.284782	-0.0355901	0.34843	0.41047	0.0875236	0.802383	0.0834302	0.0197429	0.347227	1.45315	2.04316	2.91349	0.0200323	-0.0154171	-0.00428785	-0.295269	1.32159	0.123492
ENSMUSG00000000157	Itgb2l	16	-	96422288	96443619	integrin beta 2-like [Source:MGI Symbol;Acc:MGI:1277979]	protein_coding	-0.14972	1.85755	4.66653	2.48861	0.776915	2.52126	1.21345	2.89018	125.024	3.68687	1.55848	3.55778	-0.0321457	0.0438879	4.57576	0.927199	0.277911	1.45147
ENSMUSG00000000159	Igsf5	16	+	96361668	96422121	immunoglobulin superfamily, member 5 [Source:MGI Symbol;Acc:MGI:1919308]	protein_coding	0.237961	-0.0797574	0.639131	1.01722	0.140005	0.203709	0.218834	0.672364	0.789816	2.66921	1.46352	2.98282	0.0168409	-0.011956	-0.00466174	0.188783	0.314716	0.30459
ENSMUSG00000000167	Pih1d2	9	+	50617321	50625000	PIH1 domain containing 2 [Source:MGI Symbol;Acc:MGI:1919864]	protein_coding	0.13133	3.2745	0.519624	0.160096	0.34892	1.58235	0.0125276	0.287428	0.142714	2.42307	3.10445	4.35725	0.00985565	-0.00787119	-0.00190326	-0.114868	0.104521	0.0228646
ENSMUSG00000000168	Dlat	9	-	50634633	50659780	dihydrolipoamide S-acetyltransferase (E2 component of pyruvate dehydrogenase complex) [Source:MGI Symbol;Acc:MGI:2385311]	protein_coding	0.522206	0.154418	5.18715	0.198259	3.70427	5.27313	18.5484	1.70084	1.0795	3.46862	2.46566	7.91642	12.0869	6.62255	11.9052	5.07974	1.1987	-0.324196
ENSMUSG00000000171	Sdhd	9	-	50596357	50603812	succinate dehydrogenase complex, subunit D, integral membrane protein [Source:MGI Symbol;Acc:MGI:1914175]	protein_coding	57.2804	9.95799	10.67	0.385943	25.3863	135.663	59.6815	12.1782	2.71675	4.22974	6.64296	25.7502	100.086	164.286	222.61	38.9975	2038.16	23.1809
ENSMUSG00000000182	Fgf23	6	+	127072902	127081408	fibroblast growth factor 23 [Source:MGI Symbol;Acc:MGI:1891427]	protein_coding	0.231771	-0.0693127	-0.127699	0.378369	0.124474	0.31545	0.328962	-0.0547369	0.348625	1.13471	1.53774	1.58822	0.0164777	-0.01189	-0.0043725	0.326733	0.288974	0.583145
ENSMUSG00000000183	Fgf6	6	+	127015586	127028187	fibroblast growth factor 6 [Source:MGI Symbol;Acc:MGI:95520]	protein_coding	0.125378	5.25755	0.380404	0.645385	0.151923	0.802819	0.296317	-0.026107	0.284237	1.44839	2.40276	2.20953	0.00905597	-0.00524448	-0.00374987	0.229233	0.393322	0.556712
ENSMUSG00000000184	Ccnd2	6	-	127125162	127152193	cyclin D2 [Source:MGI Symbol;Acc:MGI:88314]	protein_coding	6.00843	14.904	16.6321	10.1374	12.485	30.5421	45.1039	41.3304	6.51684	27.9905	13.1247	22.6789	26.1872	9.28497	20.3311	87.565	201.498	17.8506
ENSMUSG00000000194	Gpr107	2	+	31152316	31218775	G protein-coupled receptor 107 [Source:MGI Symbol;Acc:MGI:2139054]	protein_coding	11.1517	8.15531	16.565	2.7579	4.34609	29.9907	0.711954	1.14735	2.81984	37.3561	15.5625	6.47678	3.60482	1.87192	5.99655	2.88442	2.21866	1.05565
ENSMUSG00000000197	Nalcn	14	-	123276634	123627144	sodium leak channel, non-selective [Source:MGI Symbol;Acc:MGI:2444306]	protein_coding	11.9025	3.43311	4.781	0.994205	0.295891	1.01225	0.941635	0.360302	0.19305	5.36469	6.12347	3.92482	-0.00477272	0.054683	0.0237142	3.49453	0.523568	2.12265
ENSMUSG00000000202	Btbd17	11	-	114791217	114795945	BTB (POZ) domain containing 17 [Source:MGI Symbol;Acc:MGI:1919264]	protein_coding	0.225263	-0.0555151	0.15488	0.534909	0.158411	0.611217	0.143143	0.211183	0.317409	1.9953	2.4228	2.95559	0.0161045	0.247167	-0.00401293	-0.33758	0.629036	0.272278
ENSMUSG00000000204	Slfn4	11	+	83175186	83190216	schlafen 4 [Source:MGI Symbol;Acc:MGI:1329010]	protein_coding	0.900563	0.0270548	1.03457	1.25013	2.51687	1.00011	4.07223	1.00892	1.40808	2.46307	1.85816	3.06044	2.73493	5.308	11.2686	2.65363	1.51823	0.058136
ENSMUSG00000000214	Th	7	-	142892752	142931128	tyrosine hydroxylase [Source:MGI Symbol;Acc:MGI:98735]	protein_coding	0.125321	3.13658	-0.0609458	0.4637	1.1207	0.565824	0.14147	0.540779	0.283977	2.41975	1.23232	1.10945	0.00924527	2.57623	-0.00275913	-0.288925	0.625677	0.262887
ENSMUSG00000000215	Ins2	7	-	142678656	142743381	insulin II [Source:MGI Symbol;Acc:MGI:96573]	protein_coding	212.708	42.8143	248.715	620.107	1006.23	0.949938	305.308	68.8317	19.6175	31.4277	24.69	229.692	0.213244	0.041323	0.000674536	1999.97	1569.15	77.0054
ENSMUSG00000000216	Scnn1g	7	+	121734479	121768475	sodium channel, nonvoltage-gated 1 gamma [Source:MGI Symbol;Acc:MGI:104695]	protein_coding	0.462431	-0.0411618	0.954902	0.783051	0.119096	1.04246	0.0935756	0.0385381	0.608192	1.80029	2.0608	1.46572	0.030592	-0.0235836	-0.00624772	0.179322	0.398887	0.14494
ENSMUSG00000000223	Drp2	X	+	134404551	134456573	dystrophin related protein 2 [Source:MGI Symbol;Acc:MGI:107432]	protein_coding	2.41534	1.78785	1.81356	0.383382	0.387449	0.359212	0.424284	-0.133131	0.282577	0.859026	1.93272	2.31761	1.61978	0.228323	0.435329	0.687097	0.217386	0.570593
ENSMUSG00000000244	Tspan32	7	+	143005046	143019644	tetraspanin 32 [Source:MGI Symbol;Acc:MGI:1350360]	protein_coding	12.318	8.22526	1.64089	131.35	12.9661	19.3363	28.501	9.5065	2.63772	6.60119	6.0321	27.1679	39.9125	56.401	30.3941	20.0644	68.772	36.2304
ENSMUSG00000000247	Lhx2	2	+	38339281	38369733	LIM homeobox protein 2 [Source:MGI Symbol;Acc:MGI:96785]	protein_coding	0.401992	-0.0347655	1.44797	0.76242	1.26095	1.10716	0.0774572	-0.0372833	0.985901	3.24302	3.16519	4.37661	0.0271571	-0.0210374	-0.00551775	1.01235	0.652968	0.436746
ENSMUSG00000000248	Clec2g	6	+	128934381	128984707	C-type lectin domain family 2, member g [Source:MGI Symbol;Acc:MGI:1918059]	protein_coding	0.571556	7.27318	1.63234	0.498941	0.340353	0.86165	0.0661645	0.764337	0.64522	3.65839	3.15403	1.62252	0.0365548	-0.0283688	-0.0070982	-0.382081	0.45476	0.112441
ENSMUSG00000000253	Gmpr	13	+	45507444	45553800	guanosine monophosphate reductase [Source:MGI Symbol;Acc:MGI:1913605]	protein_coding	0.82576	0.0460523	1.04811	0.343883	0.900803	0.45146	-0.126465	0.217361	0.740081	1.44007	2.47928	2.0144	0.0493195	-0.0395733	-0.00773419	-0.205772	0.45072	-0.0417389
ENSMUSG00000000263	Glra1	11	-	55514238	55608198	glycine receptor, alpha 1 subunit [Source:MGI Symbol;Acc:MGI:95747]	protein_coding	0.291159	-0.00443307	0.751072	0.502548	0.0496948	0.981051	0.00104954	-0.232864	0.302182	1.58958	3.13578	4.10409	0.020556	-0.0164585	-0.00374511	-0.18668	0.497408	0.0151257
ENSMUSG00000000266	Mid2	X	+	140664599	140767715	midline 2 [Source:MGI Symbol;Acc:MGI:1344333]	protein_coding	2.0336	1.52973	2.70644	0.624169	0.281285	-0.0453503	0.584313	-0.0958331	0.46884	2.49804	3.3212	2.20096	0.169189	0.2316	-0.00527629	3.13527	0.529987	0.651277
ENSMUSG00000000275	Trim25	11	+	88999376	89020293	tripartite motif-containing 25 [Source:MGI Symbol;Acc:MGI:102749]	protein_coding	3.19863	2.09219	3.29703	1.61856	0.558037	0.970274	5.34345	1.04694	1.33108	1.9013	2.66487	3.47707	5.81722	9.75214	6.80266	0.111583	0.881816	-0.337312
ENSMUSG00000000276	Dgke	11	-	89035179	89066850	diacylglycerol kinase, epsilon [Source:MGI Symbol;Acc:MGI:1889276]	protein_coding	2.22029	1.98986	1.74852	1.07424	0.767158	0.867933	0.366246	0.733908	0.230467	2.09005	1.87811	2.36686	0.365386	0.331577	0.0818981	0.8684	0.431529	0.633958
ENSMUSG00000000278	Scpep1	11	-	88924020	88955465	serine carboxypeptidase 1 [Source:MGI Symbol;Acc:MGI:1921867]	protein_coding	2.85002	10.336	10.68	4.721	3.01015	98.6899	-0.209674	3.60485	2.87343	6.23917	9.31836	5.90396	10.8075	23.1034	15.6307	4.05925	2232.17	34.1852
ENSMUSG00000000282	Mnt	11	+	74830920	74845725	max binding protein [Source:MGI Symbol;Acc:MGI:109150]	protein_coding	0.372708	0.0127189	1.13598	6.59071	0.877923	15.3312	-0.0132644	2.06105	0.559137	2.15069	2.60466	3.35696	2.51683	6.6259	7.71896	0.315259	0.426866	0.109375
ENSMUSG00000000290	Itgb2	10	+	77530252	77565708	integrin beta 2 [Source:MGI Symbol;Acc:MGI:96611]	protein_coding	3.8472	6.17107	19.5038	61.4304	11.0777	127.123	40.9405	30.526	15.9899	19.0391	10.4093	23.1152	82.8967	30.6621	64.7378	10.234	328.46	1.41219
ENSMUSG00000000295	Hddc2	10	+	31313383	31328204	HD domain containing 2 [Source:MGI Symbol;Acc:MGI:1916942]	protein_coding	10.5008	22.1729	18.572	1.39649	11.081	4.12	0.152229	4.84575	701.726	1.78609	5.6585	6.82174	91.9232	58.5332	69.0141	11.8696	0.939092	88.8619
ENSMUSG00000000296	Tpd52l1	10	-	31332376	31445958	tumor protein D52-like 1 [Source:MGI Symbol;Acc:MGI:1298386]	protein_coding	0.386904	3.27086	0.51092	0.213555	2.39763	0.47953	-0.0213055	-0.262954	0.386303	1.76434	4.96962	3.88257	0.026421	-0.0212257	-0.00461318	-0.198979	0.261211	0.224134
ENSMUSG00000000301	Pemt	11	-	59970614	60046489	phosphatidylethanolamine N-methyltransferase [Source:MGI Symbol;Acc:MGI:104535]	protein_coding	1.14303	0.0279524	3.98216	0.952347	0.103105	0.912412	-0.0934905	3.38832	1.09067	4.88157	9.23871	3.86515	0.0627341	-0.0491927	0.00992199	-0.348005	0.980315	0.0674905
ENSMUSG00000000303	Cdh1	8	+	106603351	106670246	cadherin 1 [Source:MGI Symbol;Acc:MGI:88354]	protein_coding	0.424282	-0.019606	0.891993	1.22371	1.61733	0.434199	0.0359548	0.217008	0.674572	2.04718	2.9542	2.38538	0.0725507	-0.0223981	0.254226	0.0197011	0.438985	0.220069
ENSMUSG00000000305	Cdh4	2	+	179442431	179899373	cadherin 4 [Source:MGI Symbol;Acc:MGI:99218]	protein_coding	6.12027	1.77716	3.62678	1.08938	0.768048	1.10532	0.674527	0.585867	0.192423	3.43509	1.61503	2.67524	0.116635	0.0125599	-0.00229095	1.10547	0.383471	1.09925
ENSMUSG00000000308	Ckmt1	2	+	121357714	121363737	creatine kinase, mitochondrial 1, ubiquitous [Source:MGI Symbol;Acc:MGI:99441]	protein_coding	0.952541	4.92765	2.53833	0.999677	1.60584	0.788899	-0.0364363	0.752763	1.54867	3.74349	5.14784	4.61008	0.0547885	-0.04288	-0.00946862	-0.373011	0.6141	-0.0118796
ENSMUSG00000000317	Bcl6b	11	-	70224128	70229798	B cell CLL/lymphoma 6, member B [Source:MGI Symbol;Acc:MGI:1278332]	protein_coding	9.96937	-0.133144	1.4208	0.411582	0.359166	0.571587	0.434776	1.25652	0.119395	2.27194	2.37067	2.74816	-0.0137051	0.0142806	0.800809	-0.416645	0.0872322	0.780153
ENSMUSG00000000318	Clec10a	11	+	70156197	70170834	C-type lectin domain family 10, member A [Source:MGI Symbol;Acc:MGI:96975]	protein_coding	0.495015	1.54617	0.747434	14.8392	0.526681	1.42121	-0.0984194	-0.228834	1.01701	5.21059	10.7563	4.68858	15.6022	24.0515	34.1342	8.12233	0.492107	14.5979
ENSMUSG00000000320	Alox12	11	-	70241457	70255353	arachidonate 12-lipoxygenase [Source:MGI Symbol;Acc:MGI:87998]	protein_coding	1.59191	4.18336	2.44684	190.757	45.7681	1.46243	0.328467	1.14694	0.015181	2.3201	2.81959	6.79415	-0.0162647	0.0158012	0.000720993	1.47056	0.0397445	0.531271
ENSMUSG00000000325	Arvcf	16	+	18348182	18407076	armadillo repeat gene deleted in velocardiofacial syndrome [Source:MGI Symbol;Acc:MGI:109620]	protein_coding	2.01289	8.20888	3.99962	1.38495	0.608523	0.595235	4.75695	2.41941	1.4872	2.40543	7.70941	2.94144	0.0976604	0.289898	0.0615993	1.56061	0.945985	0.111437
ENSMUSG00000000326	Comt	16	-	18406886	18426852	catechol-O-methyltransferase [Source:MGI Symbol;Acc:MGI:88470]	protein_coding	3.39759	2.45238	2.42084	1.42825	11.4494	6.05202	-0.376044	0.609948	2.24947	6.0061	2.57228	4.91192	13.9122	33.5892	10.2811	2.38031	2.39615	8.41175
ENSMUSG00000000339	Rtca	3	-	116488963	116508208	RNA 3'-terminal phosphate cyclase [Source:MGI Symbol;Acc:MGI:1913618]	protein_coding	0.695456	0.261373	6.60903	97.5026	4.62653	4.99285	-0.141698	3.5484	0.283149	2.37521	5.33695	7.80051	0.0438759	45.2435	34.3927	0.990526	1.04114	-0.522462
ENSMUSG00000000340	Dbt	3	+	116513070	116549981	dihydrolipoamide branched chain transacylase E2 [Source:MGI Symbol;Acc:MGI:105386]	protein_coding	2.70505	3.07516	4.44859	0.177189	1.5792	0.921318	0.775893	0.656783	8.12194	2.05079	1.21946	3.1883	4.32281	0.206065	0.816153	0.879008	0.217018	1.38828
ENSMUSG00000000346	Dazap2	15	+	100615349	100620761	DAZ associated protein 2 [Source:MGI Symbol;Acc:MGI:1344344]	protein_coding	47.7764	113.993	94.5382	66.345	624.849	1651.51	178.16	128.024	477.991	82.1983	72.5405	85.9918	387.768	349.064	369.564	106.01	1290.66	194.352
ENSMUSG00000000355	Mcts1	X	+	38600578	38613426	malignant T cell amplified sequence 1 [Source:MGI Symbol;Acc:MGI:1916245]	protein_coding	58.1718	16.3526	6.52506	152.418	19.7039	11.172	31.8706	7.5037	3.26169	5.8771	16.2745	12.1696	142.347	217.098	130.609	39.6604	8.07195	47.1551
ENSMUSG00000000359	Rem1	2	+	152626951	152635198	rad and gem related GTP binding protein 1 [Source:MGI Symbol;Acc:MGI:1097696]	protein_coding	0.180021	1.39273	-0.16366	0.18407	0.0131889	1.78275	-0.0384242	0.791811	0.163374	141.045	4.31597	3.19555	0.136881	4.60254	11.4853	-0.0578752	0.106444	-0.0406829
ENSMUSG00000000365	Rnf17	14	+	56402581	56525032	ring finger protein 17 [Source:MGI Symbol;Acc:MGI:1353419]	protein_coding	1.90021	1.93088	1.07608	0.592879	3.03747	0.842644	0.380014	0.513022	0.306697	3.20945	3.4744	1.91424	0.477456	0.10108	0.0599218	1.14759	0.383636	1.27892
ENSMUSG00000000374	Trappc10	10	-	78186725	78244641	trafficking protein particle complex 10 [Source:MGI Symbol;Acc:MGI:1336209]	protein_coding	0.882834	2.9242	0.760006	5.2559	1.16537	2.07694	16.9054	2.17382	1.26674	4.20401	7.36203	3.55055	11.3494	6.28136	7.90296	0.482814	0.782134	-0.211226
ENSMUSG00000000378	Ccm2	11	+	6546887	6596744	cerebral cavernous malformation 2 [Source:MGI Symbol;Acc:MGI:2384924]	protein_coding	2.30982	0.361057	1.80113	13.8802	12.7136	12.2068	0.1623	10.3855	25.7216	90.88	13.8465	20.5225	14.3427	8.41846	48.4632	6.46156	1.82078	44.6981
ENSMUSG00000000381	Wap	11	-	6635482	6638637	whey acidic protein [Source:MGI Symbol;Acc:MGI:98943]	protein_coding	0.619011	0.0270552	1.69782	0.285659	0.0528113	1.78291	-0.0815264	0.346743	0.57587	1.54913	3.99011	2.52406	0.0392467	-0.0315912	-0.00637474	-0.203513	0.364978	0.0278997
ENSMUSG00000000384	Tbrg4	11	-	6615598	6626067	transforming growth factor beta regulated gene 4 [Source:MGI Symbol;Acc:MGI:1100868]	protein_coding	1.78579	2.95321	14.525	10.7913	1.75321	6.79014	1.01643	7.68182	81.3977	3.18211	3.69376	13.4753	36.0476	9.8749	9.47378	1.17891	0.0774374	4.20392
ENSMUSG00000000385	Tmprss2	16	-	97564682	97611195	transmembrane protease, serine 2 [Source:MGI Symbol;Acc:MGI:1354381]	protein_coding	0.182578	0.578912	0.356621	1.13203	0.926407	0.163427	0.431738	0.491185	0.573331	3.78112	2.0187	5.54451	0.0129327	-0.00774826	0.0200578	-0.0336658	0.37484	0.693399
ENSMUSG00000000386	Mx1	16	-	97447035	97462907	MX dynamin-like GTPase 1 [Source:MGI Symbol;Acc:MGI:97243]	polymorphic_pseudogene	0.154907	6.17326	0.918923	0.613324	0.0971616	0.680642	0.414307	0.673053	0.419093	2.92607	3.81975	3.4926	10.9148	2.2324	1.37494	-0.317172	0.374942	0.211048
ENSMUSG00000000392	Fap	2	-	62500943	62574075	fibroblast activation protein [Source:MGI Symbol;Acc:MGI:109608]	protein_coding	3.98134	2.50155	3.25117	1.08576	0.787295	0.839794	0.620078	0.495014	0.169605	5.02201	4.04587	3.48577	-0.00703022	0.00970458	-0.00259936	2.80746	1.27826	1.13189
ENSMUSG00000000394	Gcg	2	-	62474530	62483650	glucagon [Source:MGI Symbol;Acc:MGI:95674]	protein_coding	6.89731	-0.280852	11.1551	9.11606	9.4921	0.289434	14.1172	1.60448	0.316904	2.76639	2.68864	5.8662	-0.0506738	0.0504825	0.00275704	90.0402	36.3256	2.49166
ENSMUSG00000000399	Ndufa9	6	-	126821721	126849136	NADH:ubiquinone oxidoreductase subunit A9 [Source:MGI Symbol;Acc:MGI:1913358]	protein_coding	92.1945	20.9226	6.64524	56.6983	19.1627	8.34786	23.9425	7.46036	10.5018	6.10737	7.2234	13.3272	92.8725	39.7196	37.447	20.2137	4.51752	78.261
ENSMUSG00000000402	Egfl6	X	-	166523007	166585720	EGF-like-domain, multiple 6 [Source:MGI Symbol;Acc:MGI:1858599]	protein_coding	0.114214	-0.0229643	-0.0814117	0.2902	0.432598	0.150935	0.0548731	-0.174172	0.147916	0.656307	1.19654	1.53298	0.00856821	-0.00650883	-0.00199961	-0.169815	0.118099	0.0773203
ENSMUSG00000000409	Lck	4	-	129548344	129573641	lymphocyte protein tyrosine kinase [Source:MGI Symbol;Acc:MGI:96756]	protein_coding	39.4023	31.7465	32.9687	274.379	42.6438	45.7892	61.2793	135.556	18.8008	20.8488	28.1957	42.1747	0.0575394	50.7565	-0.00749541	153.495	19.473	201.198
ENSMUSG00000000411	Tssk3	4	-	129489014	129491022	testis-specific serine kinase 3 [Source:MGI Symbol;Acc:MGI:1929914]	protein_coding	0.0613786	-0.158914	0.120184	0.779607	0.23048	1.18706	0.53275	-0.0462183	0.783587	3.01395	1.87272	3.92609	0.00410882	0.000106794	0.161131	1.20278	0.51826	0.737334
ENSMUSG00000000416	Cttnbp2	6	-	18366478	18514843	cortactin binding protein 2 [Source:MGI Symbol;Acc:MGI:1353467]	protein_coding	1.41951	1.63894	1.92484	1.23116	0.500799	1.44815	0.328195	1.3565	0.874578	5.67986	3.56356	3.55631	0.193543	-0.018059	-0.00675252	0.630416	1.25671	0.704061
ENSMUSG00000000420	Galnt1	18	+	24205344	24286818	polypeptide N-acetylgalactosaminyltransferase 1 [Source:MGI Symbol;Acc:MGI:894693]	protein_coding	17.5906	9.11602	6.3086	27.8195	7.38502	6.15472	15.6094	3.79824	4.75644	124.518	10.0941	10.9227	33.9472	21.9707	31.4225	10.5143	5.17097	39.7629
ENSMUSG00000000435	Myf5	10	-	107482908	107486134	myogenic factor 5 [Source:MGI Symbol;Acc:MGI:97252]	protein_coding	0.139107	0.447838	0.918455	0.240138	0.186263	-0.196059	0.106984	0.269952	0.369101	1.82812	3.81685	3.69476	0.010271	-0.00748861	-0.00269817	-0.254425	0.240225	0.147589
ENSMUSG00000000439	Mkrn2	6	+	115601902	115622624	makorin, ring finger protein, 2 [Source:MGI Symbol;Acc:MGI:1914277]	protein_coding	0.505985	3.73087	3.33325	41.2971	1.30102	3.42125	14.8302	2.11159	6.54577	2.80528	4.46718	5.03966	4.67708	5.28898	4.30179	3.77455	0.771703	0.193246
ENSMUSG00000000440	Pparg	6	+	115360951	115490399	peroxisome proliferator activated receptor gamma [Source:MGI Symbol;Acc:MGI:97747]	protein_coding	1.40621	0.675065	1.45623	0.850399	3.61456	2.83156	-0.12865	0.75727	1.8208	4.09535	4.89148	4.20579	0.0726461	-0.0566703	-0.01172	0.479575	2.0131	2.09558
ENSMUSG00000000441	Raf1	6	-	115618067	115676635	v-raf-leukemia viral oncogene 1 [Source:MGI Symbol;Acc:MGI:97847]	protein_coding	18.2261	2.108	3.51196	4.58756	7.47886	5.12991	9.36629	1.5705	1.31099	3.87986	5.2986	6.75189	10.8435	-0.0682573	16.4006	3.43155	1.57463	4.18757
ENSMUSG00000000486	Septin1	7	-	127214447	127233130	septin 1 [Source:MGI Symbol;Acc:MGI:1858916]	protein_coding	1.45027	0.327793	3.96068	0.46672	7.82048	10.337	1.73704	5.75439	17.0374	10.2795	14.1947	17.2632	26.9497	0.704833	12.6532	7.58278	5.71311	10.0475
ENSMUSG00000000489	Pdgfb	15	-	79995874	80014977	platelet derived growth factor, B polypeptide [Source:MGI Symbol;Acc:MGI:97528]	protein_coding	5.79081	0.337851	0.880562	42.0269	0.186028	2.10896	-0.532209	4.08218	1.09789	65.8572	4.25091	13.3562	0.180246	0.15789	1.04984	2.88974	0.865077	18.2033
ENSMUSG00000000530	Acvrl1	15	+	101128522	101145336	activin A receptor, type II-like 1 [Source:MGI Symbol;Acc:MGI:1338946]	protein_coding	0.932577	3.81622	3.30213	1.16471	4.26084	0.385684	0.420515	4.32645	1.58527	3.43787	8.72421	5.5687	0.053408	1.16999	0.344358	0.22949	1.44555	0.502226
ENSMUSG00000000531	Grasp	15	+	101224188	101232756	GRP1 (general receptor for phosphoinositides 1)-associated scaffold protein [Source:MGI Symbol;Acc:MGI:1860303]	protein_coding	0.946091	0.0047969	1.51403	1.02266	0.915869	29.9716	-0.0371545	-0.467426	0.950131	1.71817	3.78983	2.88347	0.0545118	-0.0426809	-0.00941483	-0.370474	1.37193	-0.0130013
ENSMUSG00000000532	Acvr1b	15	+	101174067	101213684	activin A receptor, type 1B [Source:MGI Symbol;Acc:MGI:1338944]	protein_coding	2.23466	2.90643	0.921281	1.157	0.443737	1.11825	0.575677	0.424755	0.240255	1.95954	4.46141	3.47145	3.69757	4.42943	2.78219	-0.109521	0.663237	0.689003
ENSMUSG00000000538	Tom1l2	11	-	60226714	60352905	target of myb1-like 2 (chicken) [Source:MGI Symbol;Acc:MGI:2443306]	protein_coding	1.00733	3.22295	1.98328	1.18182	1.52075	1.30801	0.169919	1.70597	1.21353	8.14921	7.36344	4.40155	1.541	0.366237	5.13264	0.357552	1.19423	0.604363
ENSMUSG00000000544	Gpa33	1	+	166130238	166166510	glycoprotein A33 (transmembrane) [Source:MGI Symbol;Acc:MGI:1891703]	protein_coding	0.387537	0.0104833	0.780658	0.658036	0.493506	0.953759	-0.0379219	0.0954157	0.556471	1.31314	1.40277	2.69312	0.0264848	-0.0214108	-0.00448674	-0.173325	0.249251	-0.0316872
ENSMUSG00000000552	Zfp385a	15	-	103313895	103340093	zinc finger protein 385A [Source:MGI Symbol;Acc:MGI:1352495]	protein_coding	0.412693	-0.0454018	0.390844	0.810663	1.58582	0.575296	0.107161	0.767761	0.50176	2.42968	3.95605	4.59823	0.773914	2.12708	9.24472	-0.313392	0.372904	0.161113
ENSMUSG00000000555	Itga5	15	-	103344286	103366763	integrin alpha 5 (fibronectin receptor alpha) [Source:MGI Symbol;Acc:MGI:96604]	protein_coding	0.885299	6.03234	5.99987	27.8819	1.53186	1.4418	0.293833	1.95172	1.04713	4.57121	6.32017	5.23635	15.8879	7.13796	0.11291	1.81994	2.70891	0.226136
ENSMUSG00000000560	Gabra2	5	-	70957597	71095849	gamma-aminobutyric acid (GABA) A receptor, subunit alpha 2 [Source:MGI Symbol;Acc:MGI:95614]	protein_coding	2.36785	2.93676	1.58071	0.348567	0.220517	1.33985	0.572484	1.15498	0.468948	6.82273	2.88801	1.00723	-0.0128705	0.0140844	-0.00103155	0.449339	0.253361	0.832572
ENSMUSG00000000561	Wdr77	3	+	105959369	105970037	WD repeat domain 77 [Source:MGI Symbol;Acc:MGI:1917715]	protein_coding	10.8306	7.09008	6.93741	13.6239	5.56604	4.72141	0.397814	4.57052	17.1665	2.78529	6.33398	7.86914	32.8571	8.17628	11.0758	5.0893	1.96561	20.6562
ENSMUSG00000000562	Adora3	3	+	105870858	105908926	adenosine A3 receptor [Source:MGI Symbol;Acc:MGI:104847]	protein_coding	5.55273	5.45963	4.37579	0.723494	409.173	1.75783	0.43325	1.25141	0.462206	3.46571	5.23727	4.76497	10.7678	2.57325	0.0555839	1.64231	0.754697	0.385714
ENSMUSG00000000563	Atp5pb	3	-	105942698	105960099	ATP synthase peripheral stalk-membrane subunit b [Source:MGI Symbol;Acc:MGI:1100495]	protein_coding	40.3185	22.6032	21.1719	146.474	445.563	237.301	79.9283	148.517	193.598	127.31	18.5633	147.064	366.567	218.167	280.269	112.672	7.64482	93.6028
ENSMUSG00000000567	Sox9	11	+	112782224	112787760	SRY (sex determining region Y)-box 9 [Source:MGI Symbol;Acc:MGI:98371]	protein_coding	1.55463	2.02244	9.19589	0.872678	0.720166	0.0894603	0.0988885	-0.051352	1.41206	1.22608	3.95414	1.91986	0.103177	-0.0610397	0.0398569	3.12902	5.94412	-0.177186
ENSMUSG00000000568	Hnrnpd	5	-	99955935	99978938	heterogeneous nuclear ribonucleoprotein D [Source:MGI Symbol;Acc:MGI:101947]	protein_coding	34.1233	7.15781	4.15529	8.78416	34.2164	8.86803	10.3236	4.16204	2.70399	11.8562	7.60479	10.315	57.2236	38.0003	51.8302	15.8573	1.66247	18.3489
ENSMUSG00000000579	Dynlt1c	17	+	6601671	6609774	dynein light chain Tctex-type 1C [Source:MGI Symbol;Acc:MGI:3807476]	protein_coding	1.41169	0.267045	2.01258	26.2577	6.85071	41.7201	10.8037	5.9214	144.479	4.2579	4.51387	12.3412	11.8829	22.4941	8.86667	0.974855	1.06027	5.55774
ENSMUSG00000000581	C1d	11	+	17257579	17269176	C1D nuclear receptor co-repressor [Source:MGI Symbol;Acc:MGI:1927354]	protein_coding	2.08917	12.2395	5.07384	70.006	29.7763	7.47247	14.2146	11.1657	9.13276	4.81766	10.7625	32.0417	136.035	58.1244	56.3137	26.2956	2.17275	8.32556
ENSMUSG00000000594	Gm2a	11	+	55098115	55113029	GM2 ganglioside activator protein [Source:MGI Symbol;Acc:MGI:95762]	protein_coding	23.3914	14.8673	25.2733	88.2911	6.70264	48.8499	28.6406	133.655	125.715	121.132	27.218	24.2192	43.1172	48.8897	61.7027	11.7148	16.5716	64.7376
ENSMUSG00000000600	Krit1	5	+	3803184	3845564	KRIT1, ankyrin repeat containing [Source:MGI Symbol;Acc:MGI:1930618]	protein_coding	52.11	30.459	12.2559	53.8176	4.51439	53.6516	33.5887	129.345	28.2421	59.6158	11.959	7.0033	14.8403	16.1849	9.74441	8.36047	2.37556	15.5427
ENSMUSG00000000605	Clcn4	7	-	7282309	7300851	chloride channel, voltage-sensitive 4 [Source:MGI Symbol;Acc:MGI:104571]	protein_coding	21.9767	5.89451	2.35823	9.4413	9.08082	3.55198	10.9447	2.03927	1.9703	3.90192	3.13482	11.9499	17.9215	7.75457	1.04168	6.42618	1.64485	19.4367
ENSMUSG00000000606	Vmn2r88	14	+	51410820	51420721	vomeronasal 2, receptor 88 [Source:MGI Symbol;Acc:MGI:1316662]	protein_coding	0.759682	4.03171	1.11879	0.477971	0.14817	0.410358	0.259499	-0.158198	0.302176	1.87546	1.82383	2.58785	9.46287e-05	0.00178969	-0.00188094	0.615302	0.146968	0.40869
ENSMUSG00000000617	Grm6	11	+	50850685	50866208	glutamate receptor, metabotropic 6 [Source:MGI Symbol;Acc:MGI:1351343]	protein_coding	0.214346	2.56112	0.704345	0.571768	0.417187	0.71381	0.278251	-0.186755	0.379453	3.64852	3.36147	2.84357	0.0304308	0.629195	-0.00475078	0.317793	0.730508	0.518096
ENSMUSG00000000627	Sema4f	6	-	82911885	82939769	sema domain, immunoglobulin domain (Ig), TM domain, and short cytoplasmic domain [Source:MGI Symbol;Acc:MGI:1340055]	protein_coding	0.510628	1.58944	1.15256	0.826034	1.02559	0.730768	0.379892	0.574504	0.864773	2.46294	3.88672	2.03436	0.0646377	0.570127	-0.0070391	0.755749	0.634198	0.585808
ENSMUSG00000000628	Hk2	6	-	82725025	82774454	hexokinase 2 [Source:MGI Symbol;Acc:MGI:1315197]	protein_coding	2.19906	0.0157685	4.1724	0.808109	1.11311	1.13225	1.84884	0.720319	0.945643	5.11518	6.05384	5.70015	9.73593	10.1471	3.31796	1.87146	1.18321	0.0083798
ENSMUSG00000000631	Myo18a	11	+	77763246	77865980	myosin XVIIIA [Source:MGI Symbol;Acc:MGI:2667185]	protein_coding	3.24598	5.91893	2.76887	1.90526	1.32186	2.59255	1.64577	4.24941	1.92215	72.053	13.1992	10.0477	3.38415	3.70634	3.24255	1.65936	1.3067	1.91846
ENSMUSG00000000632	Sez6	11	+	77930800	77979048	seizure related gene 6 [Source:MGI Symbol;Acc:MGI:104745]	protein_coding	5.2529	3.7352	5.68222	0.553598	0.336629	0.451009	0.498287	0.112601	0.52116	2.89668	3.58523	4.7122	-0.00348608	0.00613734	-0.00262296	0.993848	0.337299	0.678646
ENSMUSG00000000673	Haao	17	-	83831156	83847963	3-hydroxyanthranilate 3,4-dioxygenase [Source:MGI Symbol;Acc:MGI:1349444]	protein_coding	2.09422	5.51884	3.09068	2.65467	1.63554	1.65266	0.295424	1.08205	0.492152	17.4125	4.92808	4.61914	5.63239	19.8432	0.655523	0.925681	1.52201	0.506438
ENSMUSG00000000682	Cd52	4	-	134082448	134095082	CD52 antigen [Source:MGI Symbol;Acc:MGI:1346088]	protein_coding	251.438	74.3346	160.077	173.098	125.315	581.894	606.322	2562.03	1530.35	228.68	93.766	151.762	1327.56	1269.68	1106.2	201.175	34.7125	380.052
ENSMUSG00000000686	Abhd15	11	+	77515121	77538607	abhydrolase domain containing 15 [Source:MGI Symbol;Acc:MGI:1914727]	protein_coding	0.447272	0.01868	-0.321715	0.216409	1.65931	1.3431	-0.0585648	0.99099	0.563032	36.4518	2.38926	5.95521	0.0299696	2.19635	-0.00493283	-0.167824	0.273221	0.0407739
ENSMUSG00000000690	Hoxb6	11	+	96292476	96301569	homeobox B6 [Source:MGI Symbol;Acc:MGI:96187]	protein_coding	0.276527	-0.0449672	2.3038	0.349135	0.346439	0.216716	0.110295	-0.335115	0.553368	2.50643	2.79388	2.87967	0.0194712	-0.0147799	-0.00438423	2.17027	0.519186	0.159043
ENSMUSG00000000693	Loxl3	6	+	83034173	83052562	lysyl oxidase-like 3 [Source:MGI Symbol;Acc:MGI:1337004]	protein_coding	0.507015	1.66539	0.493503	8.71292	0.531355	1.10463	-0.0954929	1.13197	0.765806	5.37207	4.64087	6.0326	0.280186	6.26576	-0.00521162	0.559669	0.883119	3.97246
ENSMUSG00000000701	Tcl1b5	12	+	105176344	105181145	T cell leukemia/lymphoma 1B, 5 [Source:MGI Symbol;Acc:MGI:1351635]	protein_coding	0.352761	-0.0425969	0.281401	0.640087	0.106253	0.718216	0.100992	1.24127	0.432141	2.7198	1.26189	2.76042	0.024204	-0.0185633	-0.00516463	-0.343728	0.324857	0.150131
ENSMUSG00000000706	Btn1a1	13	-	23456992	23465901	butyrophilin, subfamily 1, member A1 [Source:MGI Symbol;Acc:MGI:103118]	protein_coding	0.470682	-0.0580468	1.5099	0.665951	0.143085	0.739945	0.14261	0.765625	0.863912	2.93101	2.10583	1.73896	0.0309858	-0.0235417	-0.00666988	1.03742	0.440749	0.381163
ENSMUSG00000000708	Kat2b	17	+	53566861	53672720	K(lysine) acetyltransferase 2B [Source:MGI Symbol;Acc:MGI:1343094]	protein_coding	7.76099	2.15617	1.77982	12.8203	1.94597	1.48854	6.03579	1.52865	3.92344	2.69534	2.37289	3.69269	6.01877	6.77048	10.8623	3.74401	0.417426	3.53583
ENSMUSG00000000711	Rab5b	10	-	128677175	128696264	RAB5B, member RAS oncogene family [Source:MGI Symbol;Acc:MGI:105938]	protein_coding	0.610769	3.53955	2.6231	5.43283	1.21407	2.57187	0.494665	0.530854	0.419945	3.13737	3.9396	6.61187	4.28099	4.86179	6.34383	-0.140837	13.5829	0.254003
ENSMUSG00000000724	Cryba1	11	-	77718615	77725283	crystallin, beta A1 [Source:MGI Symbol;Acc:MGI:88518]	protein_coding	0.358402	1.49617	1.51756	0.469279	0.215968	0.154643	0.350301	0.151731	0.591079	2.57377	3.73217	5.31869	0.0242286	-0.0169616	-0.00680939	0.909954	1.05485	0.682105
ENSMUSG00000000730	Dnmt3l	10	+	78041947	78063622	DNA (cytosine-5-)-methyltransferase 3-like [Source:MGI Symbol;Acc:MGI:1859287]	protein_coding	0.648946	-0.00693907	0.931745	1.99766	1.79756	0.805567	-0.00224255	1.2799	0.848136	4.15254	7.23967	10.128	0.0406342	-0.0319972	1.96965	-0.327268	0.574403	0.0241418
ENSMUSG00000000731	Aire	10	-	78030022	78043610	autoimmune regulator (autoimmune polyendocrinopathy candidiasis ectodermal dystrophy) [Source:MGI Symbol;Acc:MGI:1338803]	protein_coding	0.414527	4.56488	1.12469	0.857863	0.465059	0.984557	0.126312	0.337984	0.501455	3.84613	3.00083	5.29015	0.0278481	-0.021384	-0.00583435	-0.369689	0.37177	0.196994
ENSMUSG00000000732	Icosl	10	+	78069302	78083913	icos ligand [Source:MGI Symbol;Acc:MGI:1354701]	protein_coding	0.991566	0.0154412	2.0522	15.0719	1.47721	1.25599	1.2103	0.798181	1.07123	3.25106	3.87069	5.8119	0.0564963	3.60436	1.30021	0.789271	0.612122	0.164641
ENSMUSG00000000738	Spg7	8	+	123062942	123097760	SPG7, paraplegin matrix AAA peptidase subunit [Source:MGI Symbol;Acc:MGI:2385906]	protein_coding	0.752407	3.58798	4.24168	54.6098	4.85674	1.81681	0.215598	1.97861	0.67875	4.0957	6.62807	4.00605	22.9265	10.4387	12.3262	3.00164	2.0639	0.34152
ENSMUSG00000000739	Sult5a1	8	-	123140192	123158315	sulfotransferase family 5A, member 1 [Source:MGI Symbol;Acc:MGI:1931463]	protein_coding	0.378611	2.0628	0.66782	0.365709	0.138237	1.37758	0.196701	0.865003	0.502459	3.73309	2.11628	2.44381	0.111892	-0.0204076	0.0157159	-0.177864	1.12249	0.163443
ENSMUSG00000000740	Rpl13	8	+	123102350	123105244	ribosomal protein L13 [Source:MGI Symbol;Acc:MGI:105922]	protein_coding	227.177	171.827	324.693	878.067	541.875	1468.89	1001.64	2393.79	4079.58	670.583	1587.41	1681.16	1531.52	1958.65	1705.64	289.258	95.2497	551.006
ENSMUSG00000000743	Chmp1a	8	-	123204264	123212763	charged multivesicular body protein 1A [Source:MGI Symbol;Acc:MGI:1920159]	protein_coding	1.39794	3.02926	7.12519	1.84419	26.1344	6.57669	0.633054	11.1192	1.78609	9.53527	9.3186	9.62516	13.3676	5.35576	9.66203	6.63037	4.03066	-0.000243162
ENSMUSG00000000751	Rpa1	11	-	75298166	75348324	replication protein A1 [Source:MGI Symbol;Acc:MGI:1915525]	protein_coding	4.21855	11.1929	4.87356	39.2122	5.83228	4.50781	-0.543795	2.30074	1.70672	27.1763	6.82922	10.5673	19.1041	15.6402	7.1665	5.75094	1.78634	17.5574
ENSMUSG00000000753	Serpinf1	11	-	75409769	75422701	serine (or cysteine) peptidase inhibitor, clade F, member 1 [Source:MGI Symbol;Acc:MGI:108080]	protein_coding	1.68785	0.157558	0.716369	1.15126	1.53399	0.733476	-0.0518804	3.42462	1.27277	2.73011	4.05022	3.42386	17.5912	5.25864	2.16667	0.582691	7.13873	9.22629
ENSMUSG00000000759	Tubgcp3	8	-	12614277	12672248	tubulin, gamma complex associated protein 3 [Source:MGI Symbol;Acc:MGI:2183752]	protein_coding	6.04169	2.81502	0.842878	1.56087	10.4577	2.10329	18.7342	4.02544	1.79472	2.17027	2.10806	3.8272	3.02885	2.43172	18.9868	3.66309	1.11724	2.85304
ENSMUSG00000000766	Oprm1	10	+	6758506	7038198	opioid receptor, mu 1 [Source:MGI Symbol;Acc:MGI:97441]	protein_coding	4.41822	0.823241	2.53079	1.52005	0.639438	1.12159	1.0902	1.52694	0.604702	7.91332	7.97547	6.81641	0.000882829	0.00474017	-0.00559569	3.41744	1.02008	1.79232
ENSMUSG00000000776	Polr3d	14	-	70438757	70443447	polymerase (RNA) III (DNA directed) polypeptide D [Source:MGI Symbol;Acc:MGI:1914315]	protein_coding	1.22301	5.46961	6.45696	1.06362	4.41153	0.998305	-0.128918	1.93714	1.1288	2.6838	3.40543	6.30588	1.46404	2.46893	3.897	-0.318071	1.51929	-0.126079
ENSMUSG00000000782	Tcf7	11	-	52252371	52283331	transcription factor 7, T cell specific [Source:MGI Symbol;Acc:MGI:98507]	protein_coding	2.43689	17.1624	0.61174	0.571156	14.5954	11.0692	7.52974	8.35692	1.4562	16.6554	23.3676	20.5421	20.3823	17.0888	23.1436	6.72075	1.32652	3.01418
ENSMUSG00000000787	Ddx3x	X	+	13280970	13294052	DEAD/H (Asp-Glu-Ala-Asp/His) box polypeptide 3, X-linked [Source:MGI Symbol;Acc:MGI:103064]	protein_coding	32.1412	21.0138	5.38201	3.25655	17.7485	48.6515	21.7258	2.59149	2.37125	6.21684	19.0613	4.79807	64.3466	45.9162	35.9474	6.82269	4.53113	4.83611
ENSMUSG00000000791	Il12rb1	8	+	70808449	70821424	interleukin 12 receptor, beta 1 [Source:MGI Symbol;Acc:MGI:104579]	protein_coding	0.830836	0.0697598	1.58858	0.653117	1.91682	0.676504	-0.1738	0.59834	0.752984	11.9162	5.60478	2.61792	0.0496396	-0.0402447	-0.00734285	-0.1209	0.43301	-0.19198
ENSMUSG00000000792	Slc5a5	8	-	70882889	70892757	solute carrier family 5 (sodium iodide symporter), member 5 [Source:MGI Symbol;Acc:MGI:2149330]	protein_coding	0.160478	-0.0397299	-0.102634	0.44294	0.248258	1.29788	0.099414	0.185447	0.473161	2.43468	2.15737	2.20049	0.0117779	-0.00875002	-0.00291631	-0.255996	0.180427	0.54384
ENSMUSG00000000794	Kcnn3	3	+	89520164	89675132	potassium intermediate/small conductance calcium-activated channel, subfamily N, member 3 [Source:MGI Symbol;Acc:MGI:2153183]	protein_coding	0.465244	2.10148	1.91627	0.838649	0.364883	0.750884	0.101505	1.8298	0.696373	2.88715	4.55632	3.58754	0.0605563	-0.023801	-0.00619423	-0.231539	0.804378	0.225769
ENSMUSG00000000804	Usp32	11	-	84984442	85140161	ubiquitin specific peptidase 32 [Source:MGI Symbol;Acc:MGI:2144475]	protein_coding	6.5928	3.22104	1.58801	1.06127	8.19906	1.98156	6.99966	1.19508	0.870986	1.80886	3.58915	2.94419	1.16342	1.19783	1.84539	2.66261	0.682815	2.10602
ENSMUSG00000000805	Car4	11	+	84957786	84966044	carbonic anhydrase 4 [Source:MGI Symbol;Acc:MGI:1096574]	protein_coding	0.450362	-0.16016	1.59523	2.65554	1.53901	-0.125142	0.519761	2.45804	0.804771	5.85975	6.9173	7.15603	0.170685	-0.0200585	-0.0086776	3.15452	0.680616	0.747355
ENSMUSG00000000811	Txnrd3	6	+	89643988	89675529	thioredoxin reductase 3 [Source:MGI Symbol;Acc:MGI:2386711]	protein_coding	1.07953	1.18696	0.0912038	0.672498	1.78547	1.23756	-0.298404	0.810549	0.785568	1.46213	3.37194	1.91148	13.6506	-0.0496036	5.43397	0.587855	0.651447	10.1796
ENSMUSG00000000817	Fasl	1	-	161780689	161788495	Fas ligand (TNF superfamily, member 6) [Source:MGI Symbol;Acc:MGI:99255]	protein_coding	2.07253	0.2501	0.106264	2.94324	2.83097	2.4078	-0.365208	1.60207	1.76355	1.51201	1.70916	5.52756	0.0944887	4.74336	6.35797	4.73512	1.32458	53.2205
ENSMUSG00000000823	Zfp512b	2	-	181582103	181592803	zinc finger protein 512B [Source:MGI Symbol;Acc:MGI:2685478]	protein_coding	0.22689	3.3029	2.91576	0.398655	0.59153	2.04741	0.52517	0.532924	1.52349	2.27184	3.65428	2.66974	18.2556	3.38855	1.11169	2.5266	1.86272	0.614169
ENSMUSG00000000826	Dnajc5	2	+	181520485	181555133	DnaJ heat shock protein family (Hsp40) member C5 [Source:MGI Symbol;Acc:MGI:892995]	protein_coding	9.09338	4.84704	0.925833	50.9409	3.15226	2.41259	7.04887	20.0985	1.42874	15.2494	3.86729	4.85478	9.38187	10.5866	6.23347	7.53857	1.33617	26.784
ENSMUSG00000000827	Tpd52l2	2	+	181497142	181517966	tumor protein D52-like 2 [Source:MGI Symbol;Acc:MGI:1913564]	protein_coding	13.333	4.22073	8.23298	25.7337	8.54417	4.85548	0.147774	2.98904	1.05748	15.4464	8.71319	4.99599	12.2098	23.7001	18.6135	2.31334	2.6424	3.91747
ENSMUSG00000000838	Fmr1	X	+	68678541	68717963	fragile X mental retardation 1 [Source:MGI Symbol;Acc:MGI:95564]	protein_coding	16.1556	11.3327	6.13371	1.70581	7.41126	1.93382	8.35302	0.643155	1.84985	14.85	9.47447	149.893	44.5388	19.595	34.5771	3.48718	3.22969	3.37232
ENSMUSG00000000861	Bcl11a	11	+	24078056	24174123	B cell CLL/lymphoma 11A (zinc finger protein) [Source:MGI Symbol;Acc:MGI:106190]	protein_coding	12.3084	8.87372	6.72453	2.18408	4.22426	3.12007	5.87342	1.13107	0.566404	6.41381	5.90548	6.70141	5.98577	6.16305	6.69646	1.59051	0.501586	1.26939
ENSMUSG00000000869	Il4	11	-	53602982	53618669	interleukin 4 [Source:MGI Symbol;Acc:MGI:96556]	protein_coding	0.931139	0.0614639	1.33452	0.520394	0.744832	0.453222	-0.159438	0.146515	0.808989	6.01258	1.14198	7.24462	0.0540799	-0.0434118	-0.00825172	-0.18427	0.479682	-0.0258701
ENSMUSG00000000876	Pxmp4	2	-	154585758	154603708	peroxisomal membrane protein 4 [Source:MGI Symbol;Acc:MGI:1891701]	protein_coding	16.9274	1.72139	4.13233	152.125	1.73652	1.66677	0.523746	0.948739	0.00657909	2.53369	2.78667	4.49206	6.59895	11.1479	4.61535	0.825965	0.341917	39.7164
ENSMUSG00000000881	Dlg3	X	+	100767722	100818410	discs large MAGUK scaffold protein 3 [Source:MGI Symbol;Acc:MGI:1888986]	protein_coding	0.548087	3.30129	1.32935	1.62679	0.535078	0.385004	-0.109974	-0.00886703	0.511419	0.706312	2.74308	4.32081	0.119912	-0.0290527	2.09593	-0.124598	0.393263	0.552352
ENSMUSG00000000884	Gnb1l	16	+	18498713	18566679	guanine nucleotide binding protein (G protein), beta polypeptide 1-like [Source:MGI Symbol;Acc:MGI:1338057]	protein_coding	4.48353	2.04815	3.12406	0.997262	1.63965	0.700979	0.417033	1.03812	0.22433	6.11602	2.95332	9.92221	0.490641	0.446488	0.793282	0.0835425	0.5064	0.562594
ENSMUSG00000000889	Dbh	2	+	27165233	27183200	dopamine beta hydroxylase [Source:MGI Symbol;Acc:MGI:94864]	protein_coding	0.164691	-0.0862965	-0.0603116	0.885259	0.272414	1.26295	0.317087	1.24264	0.501176	4.50066	2.52604	2.89753	0.079743	-0.00784567	-0.00392779	-0.410233	0.270724	0.334346
ENSMUSG00000000901	Mmp11	10	-	75923222	75936496	matrix metallopeptidase 11 [Source:MGI Symbol;Acc:MGI:97008]	protein_coding	2.60713	0.0129509	3.23606	1.06762	0.562989	0.764567	-0.00388269	0.406043	0.575662	2.75672	3.69499	8.78861	0.0270806	-0.0219241	-0.00454206	-0.168309	2.32302	0.308311
ENSMUSG00000000902	Smarcb1	10	-	75896769	75921617	SWI/SNF related, matrix associated, actin dependent regulator of chromatin, subfamily b, member 1 [Source:MGI Symbol;Acc:MGI:1328366]	protein_coding	1.74023	7.64609	5.24003	3.62764	12.6617	2.31016	-0.122943	0.747061	1.84047	5.47712	9.53101	6.77663	91.1012	39.5527	8.54275	0.662232	2.57129	-0.109974
ENSMUSG00000000903	Vpreb3	10	+	75943057	75949657	pre-B lymphocyte gene 3 [Source:MGI Symbol;Acc:MGI:98938]	protein_coding	1.91384	0.326185	0.609995	7.02526	0.541883	2.39342	104.961	3.85332	2.54833	2.78886	3.37859	12.687	0.0901138	-0.0735618	21.4783	0.691369	2.73011	-0.42674
ENSMUSG00000000915	Hip1r	5	+	123973628	124005558	huntingtin interacting protein 1 related [Source:MGI Symbol;Acc:MGI:1352504]	protein_coding	1.81744	3.53116	0.758435	1.60452	1.72791	1.25878	12.7128	0.430589	2.12774	3.17381	5.18111	4.31019	1.23828	3.70284	2.12176	1.86379	1.86122	6.03071
ENSMUSG00000000916	Nsun5	5	+	135369953	135376805	NOL1/NOP2/Sun domain family, member 5 [Source:MGI Symbol;Acc:MGI:2140844]	protein_coding	3.9837	1.53808	2.34781	1.15114	6.45916	2.50976	-0.0420853	1.09252	1.62524	6.53618	4.25829	39.3406	0.828885	12.8687	0.584428	2.96254	0.890606	9.38265
ENSMUSG00000000934	Top1mt	15	-	75657035	75678800	DNA topoisomerase 1, mitochondrial [Source:MGI Symbol;Acc:MGI:1920210]	protein_coding	0.510674	0.0782328	0.653876	0.630966	-0.0156175	0.895156	-0.183714	0.351129	0.596834	35.0486	3.54511	4.79693	0.0337143	14.0374	-0.00444957	0.0487314	0.210929	-0.119314
ENSMUSG00000000938	Hoxa10	6	-	52231197	52240854	homeobox A10 [Source:MGI Symbol;Acc:MGI:96171]	protein_coding	0.469574	2.09764	1.08917	1.41333	1.03377	0.907567	0.529582	0.614012	0.820674	5.83221	4.86479	4.46482	0.0308614	-0.0231275	-0.00697125	0.804578	0.785977	0.499832
ENSMUSG00000000942	Hoxa4	6	-	52189671	52191753	homeobox A4 [Source:MGI Symbol;Acc:MGI:96176]	protein_coding	0.16262	-0.0680107	-0.0771075	0.523065	0.111712	0.80405	0.183972	0.374203	0.269857	1.4835	1.3715	1.74512	0.0118136	-0.00818455	-0.00351992	-0.352849	0.396695	0.252592
ENSMUSG00000000948	Gm38393	7	-	59974149	60005064	predicted gene, 38393 [Source:MGI Symbol;Acc:MGI:5613898]	protein_coding	5.17078	3.88685	3.91266	0.683419	0.189691	0.0624598	0.505091	0.842881	0.248056	0.909299	2.0683	0.805739	0.162313	0.00357941	1.58596	1.77726	0.242973	0.626613
ENSMUSG00000000957	Mmp14	14	+	54431612	54445364	matrix metallopeptidase 14 (membrane-inserted) [Source:MGI Symbol;Acc:MGI:101900]	protein_coding	2.79404	8.97536	6.83105	1.7734	2.85058	1.51666	-0.30912	1.59103	2.57126	4.56752	15.5782	4.88659	1.82135	4.18286	0.224373	1.76924	7.05763	5.85912
ENSMUSG00000000958	Slc7a7	14	-	54369442	54417780	solute carrier family 7 (cationic amino acid transporter, y+ system), member 7 [Source:MGI Symbol;Acc:MGI:1337120]	protein_coding	1.85254	0.186056	-0.178892	0.693389	1.60887	3.7669	-0.371411	1.84576	1.45193	4.22587	3.34471	4.7835	0.0878142	2.96363	1.5423	3.73702	0.67521	26.2235
ENSMUSG00000000959	Oxa1l	14	+	54360834	54369673	oxidase assembly 1-like [Source:MGI Symbol;Acc:MGI:1916339]	protein_coding	4.74217	6.7645	3.37777	2.67479	4.3616	3.0368	0.247839	2.52498	1.32554	24.835	4.84915	11.7426	25.0437	22.2185	37.0998	-0.281796	0.902326	0.234146
ENSMUSG00000000976	Heatr6	11	+	83753696	83783754	HEAT repeat containing 6 [Source:MGI Symbol;Acc:MGI:1919790]	protein_coding	1.68777	1.43437	6.79991	35.7307	5.33372	3.39887	0.080273	2.93102	5.72729	43.215	3.49782	4.5816	1.98395	4.54157	4.45931	1.35713	0.418524	0.170531
ENSMUSG00000000982	Ccl3	11	-	83647844	83649355	chemokine (C-C motif) ligand 3 [Source:MGI Symbol;Acc:MGI:98260]	protein_coding	3.75501	31.7259	17.6455	1.66965	21.8709	22.4685	23.6049	0.917446	12.8502	37.7051	26.9336	45.209	0.891278	43.6116	20.8368	169.746	37.2761	7.31992
ENSMUSG00000000983	Wfdc18	11	+	83709015	83711348	WAP four-disulfide core domain 18 [Source:MGI Symbol;Acc:MGI:107506]	protein_coding	0.203852	-0.0774263	-0.0996202	0.82549	1.28946	0.9348	0.212528	1.03337	0.331932	2.19699	4.05471	2.05329	0.0145891	-0.0102084	-0.0042139	-0.397985	0.283701	0.293984
ENSMUSG00000001014	Icam4	9	+	21029373	21030595	intercellular adhesion molecule 4, Landsteiner-Wiener blood group [Source:MGI Symbol;Acc:MGI:1925619]	protein_coding	0.253875	0.073123	0.789445	0.791262	4.02753	0.179898	-0.168007	0.0424705	0.152967	-0.0613387	0.210725	0.544347	0.0184613	-0.0162804	-0.00187679	0.175062	0.0651356	-0.101101
ENSMUSG00000001016	Ilf2	3	+	90476126	90488379	interleukin enhancer binding factor 2 [Source:MGI Symbol;Acc:MGI:1915031]	protein_coding	45.109	20.4649	6.46917	9.1654	12.017	5.38726	19.1979	2.16332	1.90977	5.90398	14.9517	12.104	83.0998	45.7557	31.7545	13.9629	4.54844	14.6856
ENSMUSG00000001017	Chtop	3	-	90498956	90509498	chromatin target of PRMT1 [Source:MGI Symbol;Acc:MGI:1913761]	protein_coding	10.6788	6.22709	2.18213	6.73584	11.9687	4.63631	16.1533	2.48243	1.9262	120.538	6.76136	11.3719	27.6536	30.4325	33.1068	6.10525	2.07119	5.97193
ENSMUSG00000001018	Snapin	3	-	90488026	90491033	SNAP-associated protein [Source:MGI Symbol;Acc:MGI:1333745]	protein_coding	25.6372	11.6602	1.98558	61.6948	6.99935	31.0916	12.5227	4.05862	1.4261	1.22822	7.71901	10.6747	4.30819	29.3164	29.4402	1.95439	1.80326	30.7804
ENSMUSG00000001020	S100a4	3	+	90603771	90606045	S100 calcium binding protein A4 [Source:MGI Symbol;Acc:MGI:1330282]	protein_coding	78.1744	0.242817	60.4944	265.755	541.032	14.3802	1.36394	18.3108	49.3944	24.7152	104.086	19.9885	1046.13	959.621	1061.14	81.1862	11.1749	86.1776
ENSMUSG00000001021	S100a3	3	+	90584659	90602702	S100 calcium binding protein A3 [Source:MGI Symbol;Acc:MGI:1338849]	protein_coding	0.644801	-0.0122775	1.28168	0.628906	0.4909	0.812404	0.0112903	0.548853	0.679871	2.04457	4.40696	5.5414	0.0404045	-0.0317174	3.0003	-0.342612	0.599395	0.108183
ENSMUSG00000001023	S100a5	3	+	90608523	90611780	S100 calcium binding protein A5 [Source:MGI Symbol;Acc:MGI:1338915]	protein_coding	0.800934	0.0271286	3.50109	0.371616	0.0719537	0.591386	-0.0854984	1.03358	0.75502	3.27121	3.35077	3.94267	0.0481038	-0.0383081	-0.00789021	-0.262705	0.474385	-0.0800845
ENSMUSG00000001025	S100a6	3	+	90612882	90624181	S100 calcium binding protein A6 (calcyclin) [Source:MGI Symbol;Acc:MGI:1339467]	protein_coding	4.25591	36.8779	68.0456	68.9368	58.6483	76.0722	211.439	142.274	2796.09	9.30967	71.5337	46.6414	1451.58	1079.08	910.44	179.556	52.218	22.9254
ENSMUSG00000001027	Scn4a	11	-	106318592	106353288	sodium channel, voltage-gated, type IV, alpha [Source:MGI Symbol;Acc:MGI:98250]	protein_coding	0.352709	0.544167	1.10688	1.45909	0.256728	1.05082	0.165801	2.24396	0.552527	2.75737	5.5847	4.38565	0.2136	-0.0180379	-0.00560824	-0.110901	0.435369	0.336989
ENSMUSG00000001029	Icam2	11	-	106377656	106388075	intercellular adhesion molecule 2 [Source:MGI Symbol;Acc:MGI:96394]	protein_coding	2.74037	3.47494	2.83989	0.883516	17.201	123.81	-0.27326	-0.0301698	2.32853	32.0173	4.67883	4.80165	7.96085	34.5607	51.0605	-0.370106	1.23025	-0.197245
ENSMUSG00000001034	Mapk7	11	-	61488812	61494406	mitogen-activated protein kinase 7 [Source:MGI Symbol;Acc:MGI:1346347]	protein_coding	0.485554	2.85945	2.66161	0.509667	1.08581	1.63227	-0.0141229	-0.145686	0.704256	1.89553	4.28656	3.10965	3.41611	-0.0258463	7.60238	-0.200314	1.14233	-0.0424548
ENSMUSG00000001036	Epn2	11	-	61517249	61579687	epsin 2 [Source:MGI Symbol;Acc:MGI:1333766]	protein_coding	0.590436	2.30238	2.42625	0.967908	2.1504	1.865	0.726142	-0.157513	1.07093	6.29035	7.26026	5.66486	0.0374202	-0.0284235	-0.0078707	3.23059	0.829727	0.22945
ENSMUSG00000001039	B9d1	11	+	61505144	61512931	B9 protein domain 1 [Source:MGI Symbol;Acc:MGI:1351471]	protein_coding	0.410962	-0.00352461	1.32199	0.581289	2.2689	2.43417	-0.00466657	-0.0774385	0.826939	2.12424	2.80505	5.61223	0.0278016	-0.0221654	-0.00499494	-0.234356	1.28203	0.0124703
ENSMUSG00000001052	Sec24b	3	-	129982759	130061553	Sec24 related gene family, member B (S. cerevisiae) [Source:MGI Symbol;Acc:MGI:2139764]	protein_coding	1.06468	0.198678	1.74916	0.737322	2.90455	8.62155	3.43313	2.11048	0.808238	4.9971	3.75338	8.36643	15.4851	19.9879	17.879	9.54856	0.831634	0.29038
ENSMUSG00000001053	N4bp3	11	-	51643063	51650842	NEDD4 binding protein 3 [Source:MGI Symbol;Acc:MGI:2442218]	protein_coding	0.628236	-0.0252104	1.18616	0.40076	2.30112	0.887099	0.0453207	-0.174606	0.689863	4.8569	2.86338	4.74858	0.271299	-0.0307815	0.606645	1.47019	1.12057	0.163472
ENSMUSG00000001054	Rmnd5b	11	-	51623671	51635896	required for meiotic nuclear division 5 homolog B [Source:MGI Symbol;Acc:MGI:1913339]	protein_coding	16.5722	10.5699	0.77204	0.410816	2.26253	4.37709	-0.350818	-0.00131409	0.636599	2.55598	4.41227	12.5399	75.2244	5.19911	17.4204	0.352598	0.608486	89.6173
ENSMUSG00000001056	Nhp2	11	+	51619735	51623714	NHP2 ribonucleoprotein [Source:MGI Symbol;Acc:MGI:1098547]	protein_coding	25.8115	5.41865	41.407	75.2121	33.2155	610.635	0.556999	7.65188	278.975	74.3818	12.2388	16.8945	186.132	191.379	128.797	7.1762	2.21003	15.5208
ENSMUSG00000001062	Vps9d1	8	-	123242356	123254348	VPS9 domain containing 1 [Source:MGI Symbol;Acc:MGI:1914143]	protein_coding	15.8128	1.76159	4.62424	0.276779	1.23387	1.22006	5.01444	1.60239	0.242477	2.75256	3.29565	3.39729	1.52799	0.694094	1.41363	0.701798	5.69232	0.699473
ENSMUSG00000001065	Zfp276	8	+	123254195	123269745	zinc finger protein (C2H2 type) 276 [Source:MGI Symbol;Acc:MGI:1888495]	protein_coding	-0.0334768	2.20774	0.607085	0.291097	0.341837	1.69297	24.5354	0.540452	36.7539	1.28296	1.71069	2.74922	1.31972	1.07786	2.87997	1.4214	0.426988	0.122408
ENSMUSG00000001076	C1ql4	15	-	99084086	99087817	complement component 1, q subcomponent-like 4 [Source:MGI Symbol;Acc:MGI:3579909]	protein_coding	0.6194	0.0135045	1.0833	0.817902	0.0689158	0.522745	-0.0507644	0.54491	0.738926	1.49977	4.39783	2.79935	0.039215	-0.0313091	-0.00663378	-0.251053	0.662084	0.023719
ENSMUSG00000001082	Mfsd10	5	-	34633642	34637212	major facilitator superfamily domain containing 10 [Source:MGI Symbol;Acc:MGI:1915544]	protein_coding	3.46357	0.0553845	7.23001	5.12524	9.11674	4.01205	0.000375955	2.19779	6.26173	7.3754	4.19204	311.925	22.1103	60.4039	45.8717	-0.356486	1.4236	0.20216
ENSMUSG00000001089	Luzp1	4	+	136469761	136554780	leucine zipper protein 1 [Source:MGI Symbol;Acc:MGI:107629]	protein_coding	4.54464	6.27287	2.17127	7.581	0.554872	0.54676	0.0242187	2.78406	0.598765	5.48181	3.40789	4.68345	0.880745	0.629492	0.393064	1.21067	0.607364	7.37094
ENSMUSG00000001095	Slc13a2	11	-	78397087	78422217	solute carrier family 13 (sodium-dependent dicarboxylate transporter), member 2 [Source:MGI Symbol;Acc:MGI:1276558]	protein_coding	0.400019	-0.00515711	0.602651	0.42059	0.145529	0.366058	-0.00030542	0.353635	0.414599	1.72715	2.8659	2.31453	0.0271578	-0.0216307	-0.00491539	-0.235813	0.285752	0.116396
ENSMUSG00000001098	Kctd10	5	-	114363567	114380508	potassium channel tetramerisation domain containing 10 [Source:MGI Symbol;Acc:MGI:2141207]	protein_coding	0.752163	2.01225	10.4679	0.85695	7.52017	4.42799	-0.106912	0.883891	40.3276	2.87263	3.86419	7.60295	8.95406	13.6458	-0.00730744	-0.212312	1.63413	-0.108999
ENSMUSG00000001100	Poldip2	11	+	78512193	78522736	polymerase (DNA-directed), delta interacting protein 2 [Source:MGI Symbol;Acc:MGI:1915061]	protein_coding	1.48474	9.37689	3.78419	0.790157	9.49621	4.22526	-0.169592	3.50204	1.63142	130.546	13.4311	10.3075	9.37815	13.9383	8.20188	-0.173689	4.03688	-0.142393
ENSMUSG00000001103	Sebox	11	+	78503447	78505081	SEBOX homeobox [Source:MGI Symbol;Acc:MGI:108012]	protein_coding	0.0418776	1.94653	0.108785	0.392456	0.963605	0.515163	0.428177	-0.199866	0.386735	3.92467	1.21639	2.26943	0.00273384	0.000653859	-0.00337804	1.2795	0.266272	0.584853
ENSMUSG00000001105	Ift20	11	+	78536361	78541737	intraflagellar transport 20 [Source:MGI Symbol;Acc:MGI:1915585]	protein_coding	28.0256	17.1829	6.65529	2.39496	13.9337	242.229	69.8306	327.985	1113.74	14.8079	5.19802	17.3267	23.8247	40.131	49.9907	0.310787	5.79121	49.318
ENSMUSG00000001119	Col6a1	10	-	76708792	76726168	collagen, type VI, alpha 1 [Source:MGI Symbol;Acc:MGI:88459]	protein_coding	1.60622	0.571913	5.70561	1.65343	0.986324	0.508202	0.0875394	2.00582	1.37616	26.3989	3.94776	4.9131	0.288405	-0.0399128	0.00493876	1.25704	8.15899	-0.190982
ENSMUSG00000001120	Pcbp3	10	-	76761857	76961887	poly(rC) binding protein 3 [Source:MGI Symbol;Acc:MGI:1890470]	protein_coding	10.9433	-0.112503	1.55078	0.0286118	1.05304	1.33445	0.358484	1.51441	-0.112363	3.15318	3.5669	4.7938	0.854578	1.2108	0.00145512	-0.302517	-0.019459	0.462178
ENSMUSG00000001123	Lgals9	11	-	78962974	78984946	lectin, galactose binding, soluble 9 [Source:MGI Symbol;Acc:MGI:109496]	protein_coding	7.42527	4.63847	1.72404	31.2284	24.5934	80.8647	25.3459	11.128	6.15086	6.38693	16.2237	17.7394	30.9977	35.8432	29.1307	1.78306	6.55635	8.61311
ENSMUSG00000001127	Araf	X	+	20797814	20860519	Araf proto-oncogene, serine/threonine kinase [Source:MGI Symbol;Acc:MGI:88065]	protein_coding	6.62143	3.69574	6.02611	29.3743	7.21347	4.3613	13.6156	4.38403	0.0206946	60.5693	5.77049	14.6073	29.8998	16.7234	23.0055	9.44989	136.605	0.141566
ENSMUSG00000001128	Cfp	X	-	20925454	20931555	complement factor properdin [Source:MGI Symbol;Acc:MGI:97545]	protein_coding	26.0079	50.2114	12.2898	38.8115	22.9865	44.3758	72.9283	33.1689	8.62089	54.6763	37.8467	37.0816	116.297	24.9539	65.0629	33.0073	3.43166	11.6179
ENSMUSG00000001131	Timp1	X	+	20870166	20874735	tissue inhibitor of metalloproteinase 1 [Source:MGI Symbol;Acc:MGI:98752]	protein_coding	1.68217	0.0461924	9.47878	0.698109	0.123246	0.044443	-0.139767	-0.0954103	1.98243	2.07724	2.80548	2.50223	0.0819814	-0.0634143	-0.0131919	2.87891	3.23689	-0.131374
ENSMUSG00000001134	Uxt	X	-	20941722	20962017	ubiquitously expressed prefoldin like chaperone [Source:MGI Symbol;Acc:MGI:1277988]	protein_coding	22.5205	0.447054	4.65531	0.261344	8.34709	63.2814	-0.620562	1.26496	2.77597	0.436636	5.06957	378.713	0.114024	33.4617	12.6144	1.08186	0.554802	31.9645
ENSMUSG00000001138	Cnnm3	1	+	36511867	36528237	cyclin M3 [Source:MGI Symbol;Acc:MGI:2151055]	protein_coding	8.61085	6.45377	3.79468	1.28141	2.22016	2.49857	0.304649	0.717798	0.661342	3.67903	2.92787	4.71696	1.05002	1.81887	6.43801	1.57816	0.43443	3.79414
ENSMUSG00000001143	Lman2l	1	-	36419871	36445271	lectin, mannose-binding 2-like [Source:MGI Symbol;Acc:MGI:2443010]	protein_coding	17.608	3.70037	6.01112	25.9958	1.91825	2.56914	28.9033	5.71803	1.33114	9.10497	6.09218	7.49471	9.00787	5.29343	1.37699	3.75715	1.07837	0.667475
ENSMUSG00000001150	Mcm3ap	10	+	76468927	76515857	minichromosome maintenance complex component 3 associated protein [Source:MGI Symbol;Acc:MGI:1930089]	protein_coding	2.32766	1.30516	9.06985	0.0953346	1.77101	4.12597	0.865555	1.93576	111.673	4.05659	3.31814	9.56004	4.24672	6.60218	1.13061	0.0402695	0.356658	1.33495
ENSMUSG00000001151	Pcnt	10	-	76351263	76442786	pericentrin (kendrin) [Source:MGI Symbol;Acc:MGI:102722]	protein_coding	4.61736	1.63657	1.94865	27.4747	2.88592	2.65413	0.711211	18.9887	0.679594	9.36695	7.15907	5.37364	6.04234	15.483	4.00577	0.216656	1.44699	2.79458
ENSMUSG00000001155	Ftcd	10	+	76575648	76590338	formiminotransferase cyclodeaminase [Source:MGI Symbol;Acc:MGI:1339962]	protein_coding	0.580826	0.78983	2.32703	1.23405	0.197231	0.622271	0.226923	1.26775	0.912026	2.45333	3.8494	2.8624	0.036821	0.170982	-0.00827182	0.471051	0.770542	0.333047
ENSMUSG00000001156	Mxd1	6	-	86647042	86669161	MAX dimerization protein 1 [Source:MGI Symbol;Acc:MGI:96908]	protein_coding	5.89367	4.45057	9.01009	31.4889	11.5052	10.2685	22.486	8.6188	23.4888	13.2005	14.3683	9.00066	10.0051	7.90509	3.42486	4.8349	3.06429	1.3023
ENSMUSG00000001157	Gmcl1	6	-	86691768	86733383	germ cell-less, spermatogenesis associated 1 [Source:MGI Symbol;Acc:MGI:1345156]	protein_coding	25.0493	14.2776	13.3102	63.3653	6.28362	13.1105	51.7425	4.42915	15.1203	3.59287	4.92331	11.6782	54.0544	60.1156	30.7036	12.0535	28.4588	26.7339
ENSMUSG00000001158	Snrnp27	6	-	86675151	86684522	small nuclear ribonucleoprotein 27 (U4/U6.U5) [Source:MGI Symbol;Acc:MGI:1913868]	protein_coding	38.0982	5.42195	8.8938	57.4141	19.3133	109.993	90.0154	34.4205	3.53081	102.846	18.1159	22.853	52.4921	51.6299	100.114	17.044	1141.34	8.97656
ENSMUSG00000001166	Oas1c	5	-	120800194	120812514	2'-5' oligoadenylate synthetase 1C [Source:MGI Symbol;Acc:MGI:2149633]	protein_coding	0.675379	-0.0142742	1.26773	1.14037	4.74468	1.75741	0.126497	0.77036	0.912837	2.77135	4.15311	3.33796	0.275052	0.0623242	0.161924	-0.357408	0.483916	0.04871
ENSMUSG00000001168	Oas1h	5	+	120861421	120873506	2'-5' oligoadenylate synthetase 1H [Source:MGI Symbol;Acc:MGI:2180853]	protein_coding	0.621207	-0.0281416	1.75708	0.662385	3.7975	0.238467	0.0533385	0.56697	1.00684	1.24613	2.51261	3.07922	0.0391444	-0.03044	-0.00745679	0.407252	1.22557	0.0970852
ENSMUSG00000001173	Ocrl	X	+	47912387	47965868	OCRL, inositol polyphosphate-5-phosphatase [Source:MGI Symbol;Acc:MGI:109589]	protein_coding	5.4115	9.61622	7.99975	0.559548	0.797005	1.03959	0.125747	0.528703	0.161238	2.21558	3.40079	8.99003	2.63936	1.30715	7.18038	2.87125	0.463733	0.336755
ENSMUSG00000001175	Calm1	12	+	100199435	100209814	calmodulin 1 [Source:MGI Symbol;Acc:MGI:88251]	protein_coding	42.5672	59.7491	145.169	303.123	48.6942	621.388	233.381	366.49	469.471	387.006	571.508	183.55	308.672	308.551	286.477	148.538	303.107	155.26
ENSMUSG00000001211	Agpat3	10	-	78269178	78352489	1-acylglycerol-3-phosphate O-acyltransferase 3 [Source:MGI Symbol;Acc:MGI:1336186]	protein_coding	5.96705	9.15707	4.24125	3.33856	3.29332	2.85023	11.5087	6.68029	3.22834	77.1832	7.86077	11.5241	0.803222	0.531894	0.609777	2.18155	1.50133	-0.0260307
ENSMUSG00000001225	Slc26a3	12	+	31390871	31473917	solute carrier family 26, member 3 [Source:MGI Symbol;Acc:MGI:107181]	protein_coding	8.32561	4.93689	4.30002	1.21733	0.815798	1.371	0.678069	1.13579	0.270078	5.92617	5.12475	2.67642	0.0681519	0.0156031	-0.00163654	0.0495091	0.329073	1.05949
ENSMUSG00000001227	Sema6b	17	-	56123085	56140343	sema domain, transmembrane domain (TM), and cytoplasmic domain, (semaphorin) 6B [Source:MGI Symbol;Acc:MGI:1202889]	protein_coding	0.268446	-0.0315562	0.369317	0.476402	0.173063	0.569363	0.0728036	0.393711	0.639085	2.19696	3.55542	2.87744	0.44811	1.81029	1.68119	-0.274819	0.243899	0.108583
ENSMUSG00000001228	Uhrf1	17	+	56303321	56323486	ubiquitin-like, containing PHD and RING finger domains, 1 [Source:MGI Symbol;Acc:MGI:1338889]	protein_coding	0.887524	4.55063	3.27504	0.622419	7.00034	52.0985	8.4728	2.00972	138.441	22.1527	7.16151	6.30319	24.3987	18.3549	14.1126	5.61684	2.06996	7.14537
ENSMUSG00000001229	Dpp9	17	-	56186807	56218905	dipeptidylpeptidase 9 [Source:MGI Symbol;Acc:MGI:2443967]	protein_coding	9.5463	1.1072	5.42077	5.02833	2.20437	1.80886	0.342124	1.19719	1.08116	4.04357	6.13181	4.14683	6.52882	8.16146	2.07088	-0.0506845	0.966605	0.304521
ENSMUSG00000001240	Ramp2	11	+	101246028	101259546	receptor (calcitonin) activity modifying protein 2 [Source:MGI Symbol;Acc:MGI:1859650]	protein_coding	2.20551	-0.00582628	9.38377	18.5185	2.31847	1.60676	-0.0132093	1.08892	1.07046	5.66246	5.91332	5.55589	7.88617	0.672516	2.23831	2.57457	0.689824	0.318048
ENSMUSG00000001247	Lsr	7	-	30957770	30973464	lipolysis stimulated lipoprotein receptor [Source:MGI Symbol;Acc:MGI:1927471]	protein_coding	0.384133	0.00476637	0.827701	0.301998	1.14343	0.172069	-0.0241892	0.387279	0.381429	1.16577	1.1918	1.636	0.949116	0.24064	0.277507	-0.193274	0.508019	-0.014007
ENSMUSG00000001248	Gramd1a	7	-	31130127	31155896	GRAM domain containing 1A [Source:MGI Symbol;Acc:MGI:105490]	protein_coding	0.595573	2.1864	7.47282	4.78368	14.1264	8.65495	3.74798	4.3256	51.9325	23.6728	5.95496	21.4435	6.11279	4.51487	1.94823	8.11625	0.832563	0.419467
ENSMUSG00000001249	Hpn	7	-	31098725	31115290	hepsin [Source:MGI Symbol;Acc:MGI:1196620]	protein_coding	0.354137	3.83703	0.85378	3.4524	3.24725	3.30133	0.314456	2.33214	0.503993	10.4665	4.18125	1.85318	0.0241376	-0.0177424	-0.00593151	0.111584	2.90941	0.302758
ENSMUSG00000001260	Gabrg1	5	-	70751047	70842617	gamma-aminobutyric acid (GABA) A receptor, subunit gamma 1 [Source:MGI Symbol;Acc:MGI:103156]	protein_coding	2.60846	6.50849	2.36282	1.67755	1.09613	0.742311	1.06737	1.63073	0.206716	8.06131	3.12122	3.49216	0.0114581	0.0203725	-0.00264515	3.46764	0.720806	1.67536
ENSMUSG00000001270	Ckb	12	-	111669361	111672338	creatine kinase, brain [Source:MGI Symbol;Acc:MGI:88407]	protein_coding	1.40454	1.90447	2.79496	23.274	99.9947	5.01782	0.602472	2.37736	0.946626	20.5129	4.54016	7.28766	3.58065	0.36759	0.103437	0.216469	0.92646	-0.436528
ENSMUSG00000001280	Sp1	15	+	102406143	102436404	trans-acting transcription factor 1 [Source:MGI Symbol;Acc:MGI:98372]	protein_coding	5.74679	5.31757	4.69202	5.55129	1.29569	4.45369	5.79567	5.46789	0.593746	2.68502	9.29184	14.0861	2.8283	8.45037	13.9425	2.82846	396.841	7.38321
ENSMUSG00000001281	Itgb7	15	-	102215995	102231944	integrin beta 7 [Source:MGI Symbol;Acc:MGI:96616]	protein_coding	61.1838	23.3775	5.80559	88.3235	15.3704	38.9348	11.5637	11.5285	3.15826	10.9443	9.81087	44.9867	300.208	76.2451	182.599	2.84404	2.46647	16.3159
ENSMUSG00000001285	Myg1	15	+	102331709	102338139	melanocyte proliferating gene 1 [Source:MGI Symbol;Acc:MGI:1929864]	protein_coding	1.88265	11.0245	4.31182	5.72082	8.57104	7.38475	20.5317	6.38375	2.85158	155.471	15.8898	17.1026	36.8936	30.8515	48.2226	13.1373	17.572	2.14508
ENSMUSG00000001288	Rarg	15	-	102234938	102257517	retinoic acid receptor, gamma [Source:MGI Symbol;Acc:MGI:97858]	protein_coding	5.87384	0.0921587	4.24237	4.30623	1.15288	1.89084	2.36075	3.52964	1.21983	7.34153	13.7961	13.4764	1.31574	2.4576	4.39243	-0.216842	1.8443	-0.0442641
ENSMUSG00000001289	Pfdn5	15	+	102326116	102331873	prefoldin 5 [Source:MGI Symbol;Acc:MGI:1928753]	protein_coding	1.97784	18.5765	28.3864	48.0857	43.9481	126.181	63.3079	18.575	284.283	89.3589	212.108	31.8572	305.935	310.827	215.187	51.6662	6.97424	1.8355
ENSMUSG00000001300	Efnb2	8	-	8617434	8661242	ephrin B2 [Source:MGI Symbol;Acc:MGI:105097]	protein_coding	1.57264	4.11182	1.24786	0.799486	1.5661	1.09939	0.426046	0.473964	0.480969	3.10803	2.81045	3.37025	0.207671	0.175554	0.0847887	0.225421	0.478678	0.609209
ENSMUSG00000001305	Rrp15	1	-	186720978	186749358	ribosomal RNA processing 15 homolog (S. cerevisiae) [Source:MGI Symbol;Acc:MGI:1914473]	protein_coding	1.06159	2.33527	2.06803	1.09987	10.0543	1.72434	-0.0572616	0.369915	1.49406	2.81932	2.79245	4.17671	0.0595022	6.56035	25.9565	-0.293817	1.22762	-0.114174
ENSMUSG00000001313	Rnd2	11	+	101464999	101471853	Rho family GTPase 2 [Source:MGI Symbol;Acc:MGI:1338755]	protein_coding	0.429855	-0.00252075	0.678631	0.79814	1.28719	1.39728	-0.00766542	0.180747	0.440424	1.23963	2.60907	3.62397	35.2785	4.61343	13.7	-0.2382	0.300629	0.0904634
ENSMUSG00000001323	Srr	11	-	74906359	74925948	serine racemase [Source:MGI Symbol;Acc:MGI:1351636]	protein_coding	5.39997	1.68525	1.2943	1.13111	0.0238379	1.04146	5.29424	0.739839	0.318929	2.22888	4.22649	4.10678	0.129334	1.07043	12.8118	-0.101848	0.59395	-0.0240393
ENSMUSG00000001333	Sync	4	+	129287617	129308559	syncoilin [Source:MGI Symbol;Acc:MGI:1916078]	protein_coding	1.87704	2.95626	2.04131	0.518424	0.236226	0.528821	0.742481	0.289467	0.128156	1.57907	1.67335	1.69087	-0.0189075	0.0202689	0.0901407	1.95717	0.527276	1.01743
ENSMUSG00000001334	Fndc5	4	+	129136999	129144593	fibronectin type III domain containing 5 [Source:MGI Symbol;Acc:MGI:1917614]	protein_coding	5.91423	0.364167	1.8933	0.787697	0.221507	1.20366	0.00716144	0.388548	0.22986	0.973582	2.0374	1.34657	8.25366	0.684559	2.50143	-0.0401753	0.222106	2.93593
ENSMUSG00000001348	Acp5	9	-	22126727	22135711	acid phosphatase 5, tartrate resistant [Source:MGI Symbol;Acc:MGI:87883]	protein_coding	22.8599	14.8631	1.90883	2.29453	14.4028	12.1962	26.224	8.55084	6.42024	11.4185	7.61014	18.0063	0.132934	39.1418	1.24239	6.72803	1.88994	11.4877
ENSMUSG00000001349	Cnn1	9	+	22099216	22109630	calponin 1 [Source:MGI Symbol;Acc:MGI:104979]	protein_coding	1.32184	-0.142414	0.782379	0.574239	0.985218	0.520535	0.473442	-0.0145302	0.0224584	3.80425	2.98615	3.6062	-0.0135786	0.0143925	-0.000618165	1.38706	0.10577	0.631718
ENSMUSG00000001366	Fbxo9	9	-	78081499	78109065	f-box protein 9 [Source:MGI Symbol;Acc:MGI:1918788]	protein_coding	1.1921	1.55812	5.60168	21.2926	52.237	32.7927	3.83588	7.70097	6.4454	3.70905	2.94697	12.4535	10.3186	26.2085	17.3259	4.01529	3.06315	-0.0728439
ENSMUSG00000001376	Vps50	6	+	3498382	3603531	VPS50 EARP/GARPII complex subunit [Source:MGI Symbol;Acc:MGI:1920538]	protein_coding	2.71982	3.17655	4.13877	2.0626	2.81973	2.3433	0.509472	1.52793	1.84298	6.21808	7.08676	5.43026	16.2974	2.72658	10.7855	0.73834	0.86114	0.795826
ENSMUSG00000001380	Hars	18	-	36766528	36783205	histidyl-tRNA synthetase [Source:MGI Symbol;Acc:MGI:108087]	protein_coding	27.1037	2.77908	5.57056	1.44633	10.8638	3.45667	54.7774	0.946915	1.83882	3.16862	8.86834	5.41938	41.2241	19.4518	16.6639	5.69037	2.05737	0.113201
ENSMUSG00000001383	Zmat2	18	+	36793876	36799666	zinc finger, matrin type 2 [Source:MGI Symbol;Acc:MGI:1913742]	protein_coding	11.0602	9.17895	1.60291	1.77229	7.05379	2.45608	13.5628	1.41931	8.50969	5.29717	6.65895	96.6174	40.2377	57.3167	43.926	14.3211	1.92353	30.0206
ENSMUSG00000001403	Ube2c	2	+	164769898	164778822	ubiquitin-conjugating enzyme E2C [Source:MGI Symbol;Acc:MGI:1915862]	protein_coding	53.3506	0.647578	14.1471	159.119	24.8212	67.0697	37.9021	56.6979	287.504	2.81576	6.89723	48.6202	919.84	699.579	591.049	9.20699	0.412692	43.4987
ENSMUSG00000001415	Smg5	3	+	88336260	88362338	Smg-5 homolog, nonsense mediated mRNA decay factor (C. elegans) [Source:MGI Symbol;Acc:MGI:2447364]	protein_coding	0.560136	2.59476	1.79588	1.82825	1.61462	1.04223	0.254014	1.04931	1.57853	10.7644	5.33781	2.48882	3.53164	4.28763	6.38661	1.654	1.44616	0.749735
ENSMUSG00000001416	Cct3	3	+	88297116	88321767	chaperonin containing Tcp1, subunit 3 (gamma) [Source:MGI Symbol;Acc:MGI:104708]	protein_coding	44.6044	18.2107	24.4933	67.3908	26.8592	262.601	51.1256	11.1568	150.876	29.9826	8.10979	17.0622	3.96166	114.301	68.1682	9.29521	3.785	32.159
ENSMUSG00000001418	Glmp	3	+	88325023	88331313	glycosylated lysosomal membrane protein [Source:MGI Symbol;Acc:MGI:1913318]	protein_coding	47.0584	7.47756	9.17289	6.80946	4.3817	7.90954	16.8727	13.9713	7.65629	3.00942	5.53603	18.3151	9.64434	37.6933	10.105	7.23234	0.597407	10.8457
ENSMUSG00000001419	Mef2d	3	+	88142372	88172086	myocyte enhancer factor 2D [Source:MGI Symbol;Acc:MGI:99533]	protein_coding	2.79338	2.39622	0.423758	1.56095	1.88662	9.36325	16.5287	1.40518	2.15876	4.45888	5.09347	3.88073	15.1294	14.8335	11.7014	2.72569	1.54968	2.06971
ENSMUSG00000001420	Tmem79	3	-	88328655	88336148	transmembrane protein 79 [Source:MGI Symbol;Acc:MGI:1919163]	protein_coding	2.70696	-0.0376454	0.687064	0.264887	0.329214	0.986483	0.096269	1.56978	0.141667	2.00857	2.90144	3.63197	0.00660385	-0.00461733	-0.00195221	-0.212398	0.123062	0.266006
ENSMUSG00000001424	Snd1	6	+	28475139	28935162	staphylococcal nuclease and tudor domain containing 1 [Source:MGI Symbol;Acc:MGI:1929266]	protein_coding	25.9099	9.93654	12.5378	7.6893	8.67488	3.91709	8.6033	5.12764	0.817612	4.8605	12.9164	17.987	10.0681	16.6071	12.321	7.58316	1.59905	0.372612
ENSMUSG00000001435	Col18a1	10	-	77052178	77166548	collagen, type XVIII, alpha 1 [Source:MGI Symbol;Acc:MGI:88451]	protein_coding	2.73942	2.91924	2.22323	0.946049	0.441553	0.900552	-0.0767382	0.623633	1.04722	2.11551	5.41117	4.79384	0.0982655	-0.043602	-0.00809133	0.403657	1.9719	4.20934
ENSMUSG00000001436	Slc19a1	10	+	77032241	77061002	solute carrier family 19 (folate transporter), member 1 [Source:MGI Symbol;Acc:MGI:103182]	protein_coding	20.8493	0.0763193	1.30351	0.469766	3.81955	4.66815	-0.0488967	2.80473	0.520291	3.50093	6.23504	12.4287	14.378	18.2599	-0.00577681	-0.0262501	0.558962	25.2786
ENSMUSG00000001440	Kpnb1	11	-	97159714	97187881	karyopherin (importin) beta 1 [Source:MGI Symbol;Acc:MGI:107532]	protein_coding	11.8485	7.63023	5.61146	24.0951	9.07562	6.74298	25.6898	7.08972	7.70311	28.774	3.45686	7.59839	25.391	20.3949	22.7061	134.677	0.862678	20.3937
ENSMUSG00000001441	Npepps	11	-	97205842	97280638	aminopeptidase puromycin sensitive [Source:MGI Symbol;Acc:MGI:1101358]	protein_coding	28.1158	8.02338	17.176	22.3714	4.85117	3.8879	1.50581	4.6134	2.10703	35.1969	4.31277	5.89055	22.6905	17.9763	6	8.19854	1.59005	7.36253
ENSMUSG00000001444	Tbx21	11	-	97098071	97115331	T-box 21 [Source:MGI Symbol;Acc:MGI:1888984]	protein_coding	2.01686	0.157911	4.57456	1.51736	1.36432	9.41419	7.13487	1.19225	4.92765	34.1728	1.89439	8.0237	5.57288	5.21054	6.67597	1.91342	47.6119	0.0593641
ENSMUSG00000001445	Mrpl10	11	+	97041560	97049213	mitochondrial ribosomal protein L10 [Source:MGI Symbol;Acc:MGI:1333801]	protein_coding	3.91451	7.37049	1.7421	1.03767	9.34061	2.60598	7.86042	3.04055	4.31812	4.31528	3.27181	4.14012	51.8001	36.6587	57.5666	3.43893	3.61764	0.885153
ENSMUSG00000001467	Cyp51	5	-	4081145	4104746	cytochrome P450, family 51 [Source:MGI Symbol;Acc:MGI:106040]	protein_coding	2.26429	2.79465	7.50379	2.56666	3.66512	1.24661	0.0595143	1.54719	2.26147	3.43897	3.48542	2.19544	2.85583	1.46895	5.19879	4.2648	5.56806	1.2526
ENSMUSG00000001472	Tcf25	8	+	123373753	123403835	transcription factor 25 (basic helix-loop-helix) [Source:MGI Symbol;Acc:MGI:1914105]	protein_coding	4.47792	4.21797	4.63814	17.4233	10.9944	17.1008	45.8395	237.152	4.03002	53.0196	215.895	9.6277	88.6882	27.1451	28.5916	15.2479	7.61771	2.10536
ENSMUSG00000001473	Tubb6	18	+	67390717	67402749	tubulin, beta 6 class V [Source:MGI Symbol;Acc:MGI:1915201]	protein_coding	32.9578	0.537819	6.67074	0.762398	3.14553	4.2706	-0.360649	1.17909	2.69448	3.92248	12.1762	13.7693	2.24293	1.1702	6.20055	1.37131	12.428	33.1428
ENSMUSG00000001482	Def8	8	+	123423527	123463270	differentially expressed in FDCP 8 [Source:MGI Symbol;Acc:MGI:1346331]	protein_coding	8.53249	0.739793	3.53005	0.73147	3.14483	1.51164	0.572779	1.19358	0.391053	5.34332	3.15536	5.04326	9.94512	3.90913	4.37275	0.970569	0.744044	0.729618
ENSMUSG00000001493	Meox1	11	-	101877510	101894374	mesenchyme homeobox 1 [Source:MGI Symbol;Acc:MGI:103220]	protein_coding	0.138026	-0.0716119	-0.053505	0.367229	0.209636	0.403335	0.361113	0.901801	0.466878	2.28456	2.6281	1.74783	0.0100764	-0.00670899	-0.00328896	-0.354346	0.341451	0.331601
ENSMUSG00000001494	Sost	11	-	101962458	101967015	sclerostin [Source:MGI Symbol;Acc:MGI:1921749]	protein_coding	0.388751	-0.0735747	0.650601	0.682009	0.363868	0.652395	0.193385	-0.236757	1.16491	0.848481	2.47932	2.38561	0.0262232	-0.0195008	-0.00617274	0.210918	0.415347	0.277495
ENSMUSG00000001496	Nkx2-1	12	-	56531958	56536908	NK2 homeobox 1 [Source:MGI Symbol;Acc:MGI:108067]	protein_coding	0.0926839	1.63804	0.307481	0.163166	0.0891358	0.744924	0.161361	-0.100773	0.275878	1.35734	0.957342	2.21972	0.093436	-0.00435691	-0.00246359	-0.295013	0.39419	0.217869
ENSMUSG00000001497	Pax9	12	+	56691767	56712822	paired box 9 [Source:MGI Symbol;Acc:MGI:97493]	protein_coding	3.2262	4.96843	2.54777	0.577879	0.70937	0.243038	0.404801	-0.0608022	0.244508	1.59212	1.7433	2.77078	0.00340398	-2.49526e-05	-0.00336757	0.511829	0.574629	0.764116
ENSMUSG00000001504	Irx2	13	+	72628820	72634198	Iroquois homeobox 2 [Source:MGI Symbol;Acc:MGI:1197526]	protein_coding	0.442381	4.01552	1.255	0.736515	0.388295	0.416422	0.231523	0.130937	0.617261	1.61029	1.53066	2.16208	0.0292756	-0.0216253	-0.00696824	0.550512	0.482646	0.332929
ENSMUSG00000001506	Col1a1	11	+	94936224	94953042	collagen, type I, alpha 1 [Source:MGI Symbol;Acc:MGI:88467]	protein_coding	0.390797	2.52305	1.06255	1.44144	2.12857	1.96928	1.12044	3.93462	0.799928	7.041	10.2402	4.24878	1.85231	0.521429	0.939044	2.24703	10.2994	1.94245
ENSMUSG00000001507	Itga3	11	-	95044474	95076801	integrin alpha 3 [Source:MGI Symbol;Acc:MGI:96602]	protein_coding	0.393548	2.19675	1.43341	1.60564	0.440819	0.826463	-0.00181256	0.588275	0.623347	2.13241	2.20859	2.29744	0.256051	-0.0216996	0.0974841	-0.173821	0.469913	0.23958
ENSMUSG00000001508	Sgca	11	-	94962791	94976327	sarcoglycan, alpha (dystrophin-associated glycoprotein) [Source:MGI Symbol;Acc:MGI:894698]	protein_coding	-0.0228451	-0.14839	0.2017	0.71336	0.196231	1.05407	0.490987	-0.436258	0.189723	2.88347	2.3721	3.48799	-0.0024389	0.0052357	-0.00277629	2.13039	0.899775	0.669304
ENSMUSG00000001510	Dlx3	11	+	95120119	95125296	distal-less homeobox 3 [Source:MGI Symbol;Acc:MGI:94903]	protein_coding	2.01844	2.12559	1.80967	0.271603	0.0968112	0.945353	0.0811168	0.057352	0.417721	1.61626	3.70065	4.63549	0.0241444	-0.0186612	-0.00500743	-0.320497	0.448697	0.123437
ENSMUSG00000001517	Foxm1	6	+	128362967	128376146	forkhead box M1 [Source:MGI Symbol;Acc:MGI:1347487]	protein_coding	0.595817	3.31187	1.39069	4.76268	0.708493	9.64517	6.94778	2.7224	41.5954	2.62811	4.91913	21.7693	2.41478	9.91975	6.26983	0.568741	2.39358	7.55047
ENSMUSG00000001518	Itfg2	6	-	128409444	128424931	integrin alpha FG-GAP repeat containing 2 [Source:MGI Symbol;Acc:MGI:1915450]	protein_coding	1.63436	9.99434	1.29596	0.650317	0.391567	2.33202	-0.291275	1.4457	3.27398	30.3735	4.99354	6.54058	5.19806	0.768468	0.278709	7.41931	0.965427	34.3281
ENSMUSG00000001520	Nrip2	6	+	128399296	128416427	nuclear receptor interacting protein 2 [Source:MGI Symbol;Acc:MGI:1891884]	protein_coding	5.0807	0.665748	1.60878	0.671315	0.277717	0.740279	0.252719	0.523373	0.302893	3.64868	1.803	4.3557	5.07886	0.821401	-0.00391384	-0.0408389	0.729021	0.317561
ENSMUSG00000001521	Tulp3	6	-	128321161	128355851	tubby-like protein 3 [Source:MGI Symbol;Acc:MGI:1329045]	protein_coding	3.28138	6.35886	3.11847	1.22624	1.03172	0.711001	0.762433	2.58906	0.436985	7.66347	8.12335	5.4385	7.8345	0.498941	0.479168	0.634787	1.01082	1.00631
ENSMUSG00000001524	Gtf2h4	17	-	35667730	35673739	general transcription factor II H, polypeptide 4 [Source:MGI Symbol;Acc:MGI:1338799]	protein_coding	2.19836	0.163316	2.44685	1.62507	2.49811	4.38612	-0.343422	1.92088	2.23025	2.33566	5.02432	2.86416	2.68671	1.40983	2.40773	-0.137351	3.34383	2.15195
ENSMUSG00000001525	Tubb5	17	-	35833921	35838306	tubulin, beta 5 class I [Source:MGI Symbol;Acc:MGI:107812]	protein_coding	22.2983	27.649	50.1449	617.052	335.052	1769.7	366.4	1938.24	1321.64	158.83	345.326	432.251	487.109	471.898	384.161	126.039	326.03	212.832
ENSMUSG00000001542	Ell2	13	+	75706757	75772364	elongation factor RNA polymerase II 2 [Source:MGI Symbol;Acc:MGI:2183438]	protein_coding	9.1373	7.40374	9.90834	1.10067	2.94583	1.23884	0.400336	1.70038	0.97801	3.51008	8.39045	4.10009	2.33282	0.0818309	1.04991	1.51874	1.29976	0.839001
ENSMUSG00000001552	Jup	11	-	100368958	100397763	junction plakoglobin [Source:MGI Symbol;Acc:MGI:96650]	protein_coding	1.48696	0.141314	0.791518	1.59394	0.872985	1.99609	0.332231	2.0074	1.8606	6.85599	7.14311	10.8177	1.19786	0.307709	1.57045	1.50569	3.17683	9.65153
ENSMUSG00000001555	Fkbp10	11	+	100415697	100424824	FK506 binding protein 10 [Source:MGI Symbol;Acc:MGI:104769]	protein_coding	3.66293	4.13234	4.98473	1.62115	1.00171	30.5961	0.53339	0.13231	1.36306	4.69556	3.79253	1.83582	0.441357	-0.0334464	0.971458	0.630621	3.80353	0.898777
ENSMUSG00000001558	Klhl10	11	+	100441917	100457022	kelch-like 10 [Source:MGI Symbol;Acc:MGI:2181067]	protein_coding	0.49168	2.36271	1.31117	0.579835	0.0771373	1.40099	-0.00182043	-0.0858141	0.509071	1.62631	1.67195	3.37655	0.0323604	-0.0256679	-0.00582775	-0.271606	0.662116	0.131231
ENSMUSG00000001566	Mnx1	5	-	29473034	29478470	motor neuron and pancreas homeobox 1 [Source:MGI Symbol;Acc:MGI:109160]	protein_coding	1.03379	0.0564061	0.326207	0.802457	0.559508	1.18456	-0.151136	1.81852	0.917533	1.8997	1.58427	2.85958	0.0584206	-0.0465385	-0.00908003	-0.231612	0.546828	4.36203
ENSMUSG00000001569	Nom1	5	+	29434664	29457843	nucleolar protein with MIF4G domain 1 [Source:MGI Symbol;Acc:MGI:1861749]	protein_coding	2.39271	10.2489	1.37965	1.1308	1.30897	1.69169	3.69358	1.90793	0.56641	15.3973	2.13607	3.68083	9.75417	3.23797	0.786634	1.0681	0.798694	0.0791624
ENSMUSG00000001576	Ergic1	17	+	26561489	26656934	endoplasmic reticulum-golgi intermediate compartment (ERGIC) 1 [Source:MGI Symbol;Acc:MGI:1914708]	protein_coding	2.90706	7.94722	3.41707	108.904	4.65881	7.23257	26.2201	13.6526	3.67795	11.1093	18.2682	27.0144	16.6078	10.7842	7.55161	12.2527	5.58566	6.29036
ENSMUSG00000001583	Tnk1	11	-	69851005	69858730	tyrosine kinase, non-receptor, 1 [Source:MGI Symbol;Acc:MGI:1930958]	protein_coding	0.614426	1.03651	1.03894	0.914535	0.177694	0.44316	0.173626	0.306818	0.773797	1.93292	2.41534	4.60318	0.0386284	-0.0291987	-0.00823352	0.0505307	0.697366	0.260468
ENSMUSG00000001588	Acap1	11	-	69881567	69895539	ArfGAP with coiled-coil, ankyrin repeat and PH domains 1 [Source:MGI Symbol;Acc:MGI:2388270]	protein_coding	19.8654	0.875469	3.24939	14.2128	10.2695	12.803	9.35107	75.4205	22.1526	2.4406	4.70939	20.1179	20.5697	22.0353	10.438	1.83616	0.619874	33.3851
ENSMUSG00000001604	Tcea3	4	+	136247729	136274898	transcription elongation factor A (SII), 3 [Source:MGI Symbol;Acc:MGI:1196908]	protein_coding	0.616434	3.55956	1.26886	0.61434	0.690021	1.12682	-0.0908778	-0.297301	0.56534	2.3564	2.04241	2.38087	0.0391308	-0.0315832	-0.00627215	-0.187151	0.355336	0.0626821
ENSMUSG00000001622	Csn3	5	+	87925579	87932665	casein kappa [Source:MGI Symbol;Acc:MGI:107461]	protein_coding	0.0687198	2.75482	0.0677561	1.08951	1.00189	1.61972	0.562321	0.239906	0.406776	6.46307	1.90887	2.96313	0.00481461	-0.0012912	-0.00350487	0.443304	0.267409	0.708027
ENSMUSG00000001627	Ifrd1	12	-	40201567	40248504	interferon-related developmental regulator 1 [Source:MGI Symbol;Acc:MGI:1316717]	protein_coding	8.65819	0.156323	23.1746	29.4879	35.3178	17.8109	0.431948	1.79875	5.18519	31.9608	23.4001	14.7929	29.7524	17.9222	33.7876	11.7854	9.44745	1.75919
ENSMUSG00000001630	Stk38l	6	+	146724995	146778812	serine/threonine kinase 38 like [Source:MGI Symbol;Acc:MGI:1922250]	protein_coding	2.97714	2.89031	3.53814	0.505802	1.46996	0.820495	0.244166	0.918563	0.410133	1.78766	7.34147	4.63147	5.26217	2.04364	3.23799	0.220576	0.760367	0.394491
ENSMUSG00000001632	Brpf1	6	+	113307137	113324860	bromodomain and PHD finger containing, 1 [Source:MGI Symbol;Acc:MGI:1926033]	protein_coding	7.82789	2.62592	4.79524	0.487919	3.39722	3.54654	0.746375	2.01043	80.5263	5.39895	3.6498	9.96992	4.79493	10.3729	7.53548	2.23402	0.379712	32.6087
ENSMUSG00000001642	Akr1b3	6	-	34302434	34317478	aldo-keto reductase family 1, member B3 (aldose reductase) [Source:MGI Symbol;Acc:MGI:1353494]	protein_coding	10.3608	5.32523	5.22163	3.36656	13.96	13.6688	12.2304	11.3116	3.96368	4.73859	8.87271	31.0409	1.31459	10.0141	7.59135	8.14548	8.18367	24.2407
ENSMUSG00000001655	Hoxc13	15	+	102921103	102928814	homeobox C13 [Source:MGI Symbol;Acc:MGI:99560]	protein_coding	0.383019	1.65167	1.05515	0.617037	0.703431	0.366394	0.165529	0.284455	0.583225	1.53326	3.2101	3.9829	0.0259218	-0.0194529	-0.00592922	0.0472049	0.482044	0.239004
ENSMUSG00000001656	Hoxc11	15	+	102954427	102957708	homeobox C11 [Source:MGI Symbol;Acc:MGI:96193]	protein_coding	4.20865	-0.108416	2.48674	0.722924	0.142919	0.382764	0.328549	-0.0275521	0.389531	1.60639	3.87803	3.99591	0.000870839	0.00158778	-0.00245396	0.915234	0.192344	0.629333
ENSMUSG00000001657	Hoxc8	15	+	102990607	102994111	homeobox C8 [Source:MGI Symbol;Acc:MGI:96198]	protein_coding	15.3624	2.25416	4.28311	0.374868	0.979349	0.660893	1.07656	0.196802	-0.00818006	2.6803	6.61877	2.49647	0.213308	0.0313862	0.0722307	1.78347	0.265893	1.42859
ENSMUSG00000001661	Hoxc6	15	+	102998257	103011881	homeobox C6 [Source:MGI Symbol;Acc:MGI:96197]	protein_coding	0.920062	3.44025	4.22651	1.54503	0.752895	1.07278	0.17275	1.40775	1.14434	5.7276	10.2373	2.78513	0.26611	-0.0408081	0.0601149	1.26003	0.804765	0.287126
ENSMUSG00000001663	Gstt1	10	-	75783813	75798584	glutathione S-transferase, theta 1 [Source:MGI Symbol;Acc:MGI:107379]	protein_coding	0.51387	-0.00260975	0.944826	0.292486	1.10888	0.372649	-0.00965526	0.353754	0.526267	1.19564	3.18475	2.89951	0.0335873	-0.0266738	-0.00598166	-0.269529	0.35577	0.00974311
ENSMUSG00000001665	Gstt3	10	-	75774115	75781414	glutathione S-transferase, theta 3 [Source:MGI Symbol;Acc:MGI:2143526]	protein_coding	8.47014	9.25044	3.65368	1.09014	1.45471	1.42497	1.01609	2.68778	0.893975	5.86739	4.6001	7.10734	0.0315409	0.00657735	5.68197	0.213443	0.675141	0.977393
ENSMUSG00000001666	Ddt	10	-	75771230	75773414	D-dopachrome tautomerase [Source:MGI Symbol;Acc:MGI:1298381]	protein_coding	0.239167	0.12579	26.3139	23.5361	5.65266	6.36764	-0.109717	1.56346	265.993	3.85486	5.76676	8.66167	0.0176862	19.3691	41.6243	0.47889	2.31403	-0.314307
ENSMUSG00000001670	Tat	8	+	109990437	109999803	tyrosine aminotransferase [Source:MGI Symbol;Acc:MGI:98487]	protein_coding	0.344266	-0.0464507	0.816872	0.514366	0.110162	0.632755	0.112339	0.387321	0.578748	2.70041	2.4571	1.41516	0.0236746	-0.0180677	-0.00515245	0.241106	0.326448	0.392022
ENSMUSG00000001672	Marveld3	8	-	109947914	109962203	MARVEL (membrane-associating) domain containing 3 [Source:MGI Symbol;Acc:MGI:1920858]	protein_coding	3.26001	2.46148	0.995658	0.562953	1.1408	0.46699	0.545283	0.366744	0.232509	4.49976	1.78448	3.10569	-0.00457602	0.00728771	-0.00267119	0.433833	1.04464	0.745427
ENSMUSG00000001674	Ddx18	1	-	121553835	121567989	DEAD (Asp-Glu-Ala-Asp) box polypeptide 18 [Source:MGI Symbol;Acc:MGI:1914192]	protein_coding	0.657874	4.98597	8.8821	16.2898	9.02764	3.6518	18.6702	3.46109	77.1479	2.7297	4.72876	7.02701	6.28666	12.6476	24.4757	5.29313	2.5538	-0.0646507
ENSMUSG00000001687	Ubl3	5	-	148504635	148552789	ubiquitin-like 3 [Source:MGI Symbol;Acc:MGI:1344373]	protein_coding	22.952	494.089	113.538	62.6755	13.5763	8.00291	47.5583	4.66174	20.8655	10.3255	10.9691	13.7297	71.9705	52.6438	60.8769	129.358	21.0018	2.03955
ENSMUSG00000001700	Gramd3	18	+	56400337	56503792	GRAM domain containing 3 [Source:MGI Symbol;Acc:MGI:1914815]	protein_coding	2.16329	8.4268	1.45286	0.762042	10.6427	8.01131	-0.368241	6.46011	1.61252	1.93375	5.19584	16.2202	0.0974205	5.05937	3.25713	9.82157	1.31821	30.8156
ENSMUSG00000001707	Eef1e1	13	-	38644207	38659058	eukaryotic translation elongation factor 1 epsilon 1 [Source:MGI Symbol;Acc:MGI:1913393]	protein_coding	8.63915	1.67321	5.24405	0.524487	9.2502	3.03448	-0.135067	2.63397	0.759129	111.558	8.42034	3.76603	12.2893	3.38957	5.49415	4.10046	1.72226	-0.107173
ENSMUSG00000001729	Akt1	12	-	112653821	112674884	thymoma viral proto-oncogene 1 [Source:MGI Symbol;Acc:MGI:87986]	protein_coding	3.38642	6.49838	2.96253	1.80841	10.5622	6.55948	21.66	5.48994	4.42916	77.1492	14.0077	8.4953	17.1875	15.0723	13.403	7.11887	3.36814	0.0290194
ENSMUSG00000001739	Cldn15	5	+	136966616	136975858	claudin 15 [Source:MGI Symbol;Acc:MGI:1913103]	protein_coding	-0.141197	3.27324	0.819884	0.100024	0.390822	2.15946	62.4368	2.6248	148.134	3.38749	2.17065	4.56483	-0.0119835	2.99525	2.80213	0.224864	0.092349	0.165448
ENSMUSG00000001741	Il16	7	-	83642825	83745726	interleukin 16 [Source:MGI Symbol;Acc:MGI:1270855]	protein_coding	1.49478	7.46061	10.0765	7.80256	8.18499	7.8086	7.21174	5.37978	80.0516	5.1036	4.1834	11.5683	8.3876	14.8392	11.6216	1.6844	0.358312	4.8908
ENSMUSG00000001750	Tcirg1	19	-	3896050	3907133	T cell, immune regulator 1, ATPase, H+ transporting, lysosomal V0 protein A3 [Source:MGI Symbol;Acc:MGI:1350931]	protein_coding	2.31394	0.238028	2.8863	5.47053	2.86001	3.86476	-0.168504	4.73505	1.8608	7.73224	12.6544	4.89278	28.3775	108.446	23.5662	0.12076	1.86501	2.35641
ENSMUSG00000001751	Naglu	11	+	101070012	101077672	alpha-N-acetylglucosaminidase (Sanfilippo disease IIIB) [Source:MGI Symbol;Acc:MGI:1351641]	protein_coding	1.25156	0.0662188	2.92554	1.8446	234.129	0.947727	-0.173674	2.61251	1.6325	4.00964	3.09439	3.72756	2.57535	7.56196	-0.0103478	2.0028	1.48399	-0.0680435
ENSMUSG00000001755	Coasy	11	+	101082565	101086619	Coenzyme A synthase [Source:MGI Symbol;Acc:MGI:1918993]	protein_coding	5.36475	6.64564	0.0299714	2.01239	4.73881	78.2246	2.01699	0.84978	2.8481	3.77303	4.49118	9.92308	0.160777	20.667	10.7781	0.877671	1.94887	38.1443
ENSMUSG00000001761	Smo	6	+	29735503	29761365	smoothened, frizzled class receptor [Source:MGI Symbol;Acc:MGI:108075]	protein_coding	9.489	3.25603	4.44943	0.408685	0.854872	0.248099	0.773223	0.067807	0.192952	1.91163	4.31811	3.93006	1.96348	1.03985	0.97078	0.755102	0.428659	1.14173
ENSMUSG00000001763	Tspan33	6	+	29694222	29718559	tetraspanin 33 [Source:MGI Symbol;Acc:MGI:1919012]	protein_coding	4.04884	2.43661	1.85786	1.32405	18.5762	30.6658	0.71872	5.36831	1.81917	15.7549	11.982	4.64127	5.31854	4.8836	3.35481	0.8348	0.790633	1.03449
ENSMUSG00000001767	Crnkl1	2	-	145917479	145935014	crooked neck pre-mRNA splicing factor 1 [Source:MGI Symbol;Acc:MGI:1914127]	protein_coding	0.111376	10.7185	12.321	1.22529	8.7165	1.28544	1.05127	62.0499	164.301	4.50169	3.31803	3.29541	20.9146	25.8847	17.1209	2.84497	1.28148	1.2187
ENSMUSG00000001768	Rin2	2	+	145675215	145887616	Ras and Rab interactor 2 [Source:MGI Symbol;Acc:MGI:1921280]	protein_coding	1.89983	8.46657	3.62847	2.19068	1.13058	2.46268	5.51137	0.816032	1.79502	8.17071	13.7895	7.7669	10.6979	8.40041	4.49508	2.40203	2.07485	0.328945
ENSMUSG00000001773	Folh1	7	-	86718977	86775943	folate hydrolase 1 [Source:MGI Symbol;Acc:MGI:1858193]	protein_coding	0.0360429	-0.125203	0.103354	0.485193	0.171752	0.307349	0.391667	-0.00795499	0.22137	1.26256	1.03531	0.380181	0.0023246	0.000777679	-0.00309449	2.51383	0.242286	0.614593
ENSMUSG00000001774	Chordc1	9	+	18292125	18317442	cysteine and histidine-rich domain (CHORD)-containing, zinc-binding protein 1 [Source:MGI Symbol;Acc:MGI:1914167]	protein_coding	19.179	13.9245	8.78387	53.8632	4.76209	3.39932	10.8854	1.72993	1.25176	5.51405	5.23036	6.68652	4.90026	8.52794	15.7659	6.15661	2.66338	2.45961
ENSMUSG00000001783	Rtcb	10	-	85938637	85957823	RNA 2',3'-cyclic phosphate and 5'-OH ligase [Source:MGI Symbol;Acc:MGI:106379]	protein_coding	6.52115	9.12822	6.83022	2.46458	20.8293	5.97838	65.6988	7.6924	4.35949	11.8567	315.854	8.91561	12.1261	13.6458	12.3238	5.40461	6.35058	-0.148812
ENSMUSG00000001785	Pwp1	10	+	85829494	85889096	PWP1 homolog, endonuclein [Source:MGI Symbol;Acc:MGI:1914735]	protein_coding	1.58983	3.7275	2.8012	1.15241	139.337	2.07435	-0.0462865	-0.0969707	2.21117	2.22905	2.32797	5.52137	28.1552	20.8584	28.6098	1.43706	1.82476	-0.0143237
ENSMUSG00000001786	Fbxo7	10	+	86021972	86051873	F-box protein 7 [Source:MGI Symbol;Acc:MGI:1917004]	protein_coding	4.05957	1.55503	2.47593	0.735517	2.59542	1.52753	0.687997	0.273893	0.284795	4.72367	2.64002	1.89023	16.6063	10.634	4.42244	2.92375	0.552261	1.34061
ENSMUSG00000001794	Capns1	7	-	30186936	30198811	calpain, small subunit 1 [Source:MGI Symbol;Acc:MGI:88266]	protein_coding	0.914449	20.7949	20.4057	154.694	12.167	8.16449	22.0089	10.0549	241.103	8.2067	16.2195	91.3861	135.487	122.509	158.37	5.25218	3.40993	0.415346
ENSMUSG00000001802	Lrp3	7	-	35200027	35215498	low density lipoprotein receptor-related protein 3 [Source:MGI Symbol;Acc:MGI:3584516]	protein_coding	0.658285	-0.0109964	1.23014	0.986488	0.629558	1.46985	0.00772206	0.445052	0.888921	3.16458	5.79721	3.01511	0.29211	0.029865	0.146607	-0.342584	0.465948	0.117461
ENSMUSG00000001804	Dsg4	18	+	20436175	20471821	desmoglein 4 [Source:MGI Symbol;Acc:MGI:2661061]	protein_coding	1.37556	2.30534	1.48802	0.304267	0.0688094	0.559375	0.104315	0.10768	0.178319	1.41776	1.24785	1.7033	0.00877019	-0.00630323	-0.00240588	-0.239755	0.271348	0.142888
ENSMUSG00000001815	Evx2	2	-	74652991	74659557	even-skipped homeobox 2 [Source:MGI Symbol;Acc:MGI:95462]	protein_coding	0.0703027	-0.0912516	0.028134	0.386606	0.281497	0.443288	0.331968	-0.130277	0.204628	0.648706	1.82994	0.53487	0.00506958	-0.0022259	-0.00282439	0.688249	0.204531	0.357322
ENSMUSG00000001819	Hoxd13	2	+	74668310	74671599	homeobox D13 [Source:MGI Symbol;Acc:MGI:96205]	protein_coding	0.225458	4.30768	0.3812	0.416993	0.445109	0.420575	0.112143	0.172264	0.29983	1.62184	1.89411	3.19806	0.0161595	-0.0121473	-0.00380143	-0.302871	0.237676	0.201753
ENSMUSG00000001823	Hoxd12	2	+	74675013	74677705	homeobox D12 [Source:MGI Symbol;Acc:MGI:96204]	protein_coding	0.03757	-0.0878969	0.0566683	0.395718	0.280876	0.439577	0.254617	0.496631	0.227504	0.856569	2.63333	2.84471	0.0025987	-0.000283882	-0.00230874	-0.363619	0.171521	0.341322
ENSMUSG00000001827	Folr1	7	-	101858331	101870788	folate receptor 1 (adult) [Source:MGI Symbol;Acc:MGI:95568]	protein_coding	0.202498	-0.0506528	-0.124027	0.214286	1.66534	0.959149	0.129498	0.567257	0.516482	2.57585	1.74623	3.99392	0.146534	14.4668	0.157286	-0.312348	0.231241	0.181104
ENSMUSG00000001829	Clpb	7	+	101663633	101795506	ClpB caseinolytic peptidase B [Source:MGI Symbol;Acc:MGI:1100517]	protein_coding	5.45192	2.08232	1.76875	1.29735	2.14799	3.83189	28.4725	1.6181	2.11665	6.21297	6.06071	6.14049	0.654563	0.197789	2.4476	2.75537	1.68548	0.730303
ENSMUSG00000001833	Septin7	9	+	25252439	25308571	septin 7 [Source:MGI Symbol;Acc:MGI:1335094]	protein_coding	6.97121	38.2487	15.2512	108.285	64.2318	37.3067	66.2499	161.074	6.26477	64.3559	17.2414	22.1548	92.6867	91.8042	112.361	194.147	124.698	6.14628
ENSMUSG00000001844	Zdhhc4	5	-	143316489	143329256	zinc finger, DHHC domain containing 4 [Source:MGI Symbol;Acc:MGI:1920131]	protein_coding	1.76704	0.0786937	7.12122	3.80246	8.42348	3.53565	-0.203617	1.4647	2.10761	6.92396	4.6743	4.35487	38.4659	23.9075	5.91964	3.14197	1.65556	0.261753
ENSMUSG00000001847	Rac1	5	-	143503634	143528036	Rac family small GTPase 1 [Source:MGI Symbol;Acc:MGI:97845]	protein_coding	29.5661	12.7241	7.89126	84.8394	42.7563	54.5742	22.2767	5.81123	5.49572	14.6597	74.2843	19.0878	78.7155	82.2834	164.969	40.3317	4.61916	18.3662
ENSMUSG00000001855	Nup214	2	+	31974436	32053975	nucleoporin 214 [Source:MGI Symbol;Acc:MGI:1095411]	protein_coding	25.2714	7.83974	4.75192	4.50618	2.64622	23.4885	9.74846	2.42557	0.685315	22.5018	6.57608	11.2996	2.14298	13.0102	1.67633	3.93191	0.91926	11.2933
ENSMUSG00000001864	Aif1l	2	+	31950139	31973442	allograft inflammatory factor 1-like [Source:MGI Symbol;Acc:MGI:1919598]	protein_coding	1.61438	-0.134484	1.08945	0.550938	2.36974	1.53472	0.416899	0.466247	0.814474	5.23092	3.95877	3.22144	0.07168	-0.013112	-0.00640786	1.0164	0.476988	0.667873
ENSMUSG00000001865	Cpa3	3	-	20215620	20242181	carboxypeptidase A3, mast cell [Source:MGI Symbol;Acc:MGI:88479]	protein_coding	1.23873	5.94751	0.970147	0.672636	3.70682	2.11623	0.327526	1.37874	0.356113	2.66315	2.06615	2.56926	2.57082	33.2203	5.13195	0.343526	0.32648	0.740442
ENSMUSG00000001870	Ltbp1	17	+	75005568	75392512	latent transforming growth factor beta binding protein 1 [Source:MGI Symbol;Acc:MGI:109151]	protein_coding	5.14278	3.9109	4.99623	53.5644	7.25435	6.72017	0.663015	0.343048	0.209847	3.73051	6.50862	6.42423	0.645482	0.191043	0.427429	0.745497	0.47215	0.945604
ENSMUSG00000001891	Ugp2	11	-	21321138	21371201	UDP-glucose pyrophosphorylase 2 [Source:MGI Symbol;Acc:MGI:2183447]	protein_coding	3.14217	3.87253	4.81445	1.12217	6.89225	2.76899	26.8874	6.43648	4.61528	35.1908	12.7796	3.46383	5.81408	30.8792	28.2694	7.26553	4.06579	-0.38364
ENSMUSG00000001901	Kcnh6	11	+	106008124	106034549	potassium voltage-gated channel, subfamily H (eag-related), member 6 [Source:MGI Symbol;Acc:MGI:2684139]	protein_coding	0.185799	-0.05814	-0.10463	0.414944	0.162388	1.14465	0.152536	0.260351	0.419402	2.23983	2.69786	3.5601	0.0134465	-0.00970424	-0.00359875	-0.330265	0.52475	0.211266
ENSMUSG00000001909	Trmt1	8	+	84686307	84699808	tRNA methyltransferase 1 [Source:MGI Symbol;Acc:MGI:1289155]	protein_coding	1.51049	4.35423	3.44484	1.98613	4.57042	13.0544	0.160601	1.56994	2.12184	9.74908	9.77401	6.4193	12.7225	0.902376	-0.0128615	2.66104	4.32593	0.160512
ENSMUSG00000001910	Nacc1	8	-	84670479	84687902	nucleus accumbens associated 1, BEN and BTB (POZ) domain containing [Source:MGI Symbol;Acc:MGI:1914080]	protein_coding	0.760566	2.05122	1.08994	0.594546	0.291116	3.29582	2.47057	24.9741	1.01902	1.34119	3.63269	3.20061	2.80809	4.50695	1.12391	0.903736	0.708241	1.58917
ENSMUSG00000001911	Nfix	8	-	84699876	84800344	nuclear factor I/X [Source:MGI Symbol;Acc:MGI:97311]	protein_coding	2.73377	0.049309	2.54383	23.5481	13.3032	4.88974	0.502195	0.962169	0.812934	8.50873	6.50735	13.1753	4.78965	9.55093	2.6285	1.93108	2.27216	2.26551
ENSMUSG00000001918	Slc1a5	7	+	16781340	16798274	solute carrier family 1 (neutral amino acid transporter), member 5 [Source:MGI Symbol;Acc:MGI:105305]	protein_coding	3.16574	5.56052	3.69863	1.70876	17.6726	7.28293	17.6473	2.44378	3.38929	5.6407	6.11616	11.3471	3.21464	6.3184	9.44138	0.457053	3.96636	-0.544579
ENSMUSG00000001924	Uba1	X	+	20658326	20683179	ubiquitin-like modifier activating enzyme 1 [Source:MGI Symbol;Acc:MGI:98890]	protein_coding	29.1935	5.28349	14.4172	96.9817	16.9386	5.64741	8.73275	113.656	0.57672	25.8141	8.26856	184.824	31.1891	25.7504	24.4599	9.31452	2.61609	10.6149
ENSMUSG00000001930	Vwf	6	+	125546774	125686679	Von Willebrand factor [Source:MGI Symbol;Acc:MGI:98941]	protein_coding	5.03927	7.99805	3.44879	86.6678	122.358	100.274	0.661733	1.08037	0.962346	10.1572	8.33467	9.22621	1.76013	0.868094	0.338215	1.03354	0.835022	1.93566
ENSMUSG00000001942	Siae	9	+	37555698	37649655	sialic acid acetylesterase [Source:MGI Symbol;Acc:MGI:104803]	protein_coding	7.13856	3.73073	3.09491	1.41574	2.71334	2.41568	19.6782	0.947271	1.1364	2.48885	4.1028	6.0112	0.23687	1.56772	3.58107	4.05527	1.15685	0.146942
ENSMUSG00000001943	Vsig2	9	+	37539255	37544205	V-set and immunoglobulin domain containing 2 [Source:MGI Symbol;Acc:MGI:1928009]	protein_coding	0.142568	0.680914	0.0477989	12.9324	2.19281	0.533826	0.55477	134.867	0.427196	2.70684	4.74747	1.52907	0.101651	-0.00453977	0.0540513	-0.604902	0.424734	0.921678
ENSMUSG00000001946	Esam	9	+	37528078	37538319	endothelial cell-specific adhesion molecule [Source:MGI Symbol;Acc:MGI:1916774]	protein_coding	9.01711	-0.0711403	0.666329	6.05341	5.7565	84.5199	0.201157	3.89885	0.291318	88.6093	3.47582	2.74786	-0.000651178	0.00201542	-0.00136108	-0.286484	0.107509	0.506253
ENSMUSG00000001948	Spa17	9	-	37603290	37613722	sperm autoantigenic protein 17 [Source:MGI Symbol;Acc:MGI:1333778]	protein_coding	0.157051	-0.0891942	-0.0510971	0.700259	2.71746	1.0183	0.25371	1.01993	0.299862	1.93107	1.96526	3.94278	4.66542	4.17012	16.3435	-0.416033	0.270432	0.347908
ENSMUSG00000001962	Fam50a	X	+	74313033	74320149	family with sequence similarity 50, member A [Source:MGI Symbol;Acc:MGI:1351626]	protein_coding	17.3253	4.00565	4.51461	0.555215	6.85338	4.90959	3.05984	7.10911	1.07235	1.32357	5.35787	6.49389	21.1829	11.116	8.43324	8.30926	0.893006	18.5954
ENSMUSG00000001964	Emd	X	+	74254687	74261548	emerin [Source:MGI Symbol;Acc:MGI:108117]	protein_coding	2.80737	0.394512	5.72471	1.04728	12.1782	4.91356	-0.356698	5.19539	2.05725	2.2206	7.90222	12.4117	0.113808	53.1995	22.3364	0.75572	3.11528	-0.507854
ENSMUSG00000001983	Taco1	11	+	106066061	106073612	translational activator of mitochondrially encoded cytochrome c oxidase I [Source:MGI Symbol;Acc:MGI:1917457]	protein_coding	0.579627	0.0369746	1.35518	0.755542	2.05737	0.708447	-0.102309	1.48392	0.51906	1.83735	3.2447	1.74893	8.0089	-0.030247	-0.00583853	-0.152274	0.32252	-0.0380945
ENSMUSG00000001985	Grik3	4	+	125490700	125714173	glutamate receptor, ionotropic, kainate 3 [Source:MGI Symbol;Acc:MGI:95816]	protein_coding	1.69614	1.08631	0.944697	0.493753	0.321314	0.675563	0.422716	1.02483	0.206675	2.74877	1.8619	1.51989	0.0119671	0.00373636	-0.0025077	0.0675153	0.332415	0.590186
ENSMUSG00000001986	Gria3	X	+	41400854	41678601	glutamate receptor, ionotropic, AMPA3 (alpha 3) [Source:MGI Symbol;Acc:MGI:95810]	protein_coding	2.16275	9.50092	3.96593	0.902881	0.624571	0.40333	0.499433	0.00721074	0.391331	4.56583	5.41496	2.7337	41.4177	22.8585	29.9715	3.17092	0.49315	0.90333
ENSMUSG00000001988	Npas1	7	-	16455721	16477728	neuronal PAS domain protein 1 [Source:MGI Symbol;Acc:MGI:109205]	protein_coding	0.6177	0.0956232	-0.289758	0.715518	0.228246	1.06441	-0.205368	0.946925	0.454529	2.58786	2.19267	2.27776	0.0394305	-0.0329852	-0.00511839	0.0742899	0.243752	7.04251
ENSMUSG00000001995	Sipa1l2	8	-	125418063	125569808	signal-induced proliferation-associated 1 like 2 [Source:MGI Symbol;Acc:MGI:2676970]	protein_coding	2.94166	3.63941	2.0122	0.979514	1.43853	1.62315	0.635621	2.02087	0.810552	8.43738	4.52527	4.64182	0.103476	1.39321	5.20349	-0.251539	0.767242	1.03813
ENSMUSG00000001998	Ap4e1	2	+	127008717	127067909	adaptor-related protein complex AP-4, epsilon 1 [Source:MGI Symbol;Acc:MGI:1336993]	protein_coding	15.7083	7.50921	8.95374	3.46696	2.37064	2.31217	0.866921	2.55626	0.541628	6.01509	7.4106	4.63552	0.253918	2.10677	0.133734	2.28197	0.351633	2.00212
ENSMUSG00000001999	Blvra	2	+	127070665	127097084	biliverdin reductase A [Source:MGI Symbol;Acc:MGI:88170]	protein_coding	8.46281	21.7855	4.63574	1.52084	10.7395	3.33821	91.2885	8.07999	4.28431	11.2446	11.0766	6.04077	10.2063	12.3982	59.2481	6.30735	6.25972	-0.293138
ENSMUSG00000002006	Pdzd4	X	-	73793359	73824969	PDZ domain containing 4 [Source:MGI Symbol;Acc:MGI:2443483]	protein_coding	0.289767	0.674918	0.579459	0.3251	0.205287	-0.0300607	0.271867	0.538503	0.462792	1.35925	1.98621	2.40248	2.70081	-0.0146625	0.0877792	0.260108	0.34901	0.293254
ENSMUSG00000002007	Srpk3	X	+	73774405	73778925	serine/arginine-rich protein specific kinase 3 [Source:MGI Symbol;Acc:MGI:1891338]	protein_coding	0.142099	5.70654	0.165116	0.249416	0.133347	0.855897	0.243723	0.0896871	0.277481	2.67061	1.52663	2.05012	0.0103048	0.320768	-0.00364298	-0.401063	0.252354	0.333189
ENSMUSG00000002010	Idh3g	X	-	73778963	73786897	isocitrate dehydrogenase 3 (NAD+), gamma [Source:MGI Symbol;Acc:MGI:1099463]	protein_coding	10.4919	7.95446	3.15101	1.29707	26.785	8.73257	-0.610139	4.19048	2.69211	85.7413	13.6332	12.9544	120.273	105.565	169.453	0.904252	3.60453	26.9637
ENSMUSG00000002012	Pnck	X	-	73655994	73660117	pregnancy upregulated non-ubiquitously expressed CaM kinase [Source:MGI Symbol;Acc:MGI:1347357]	protein_coding	0.211973	-0.0345036	0.610546	0.463628	0.0754117	0.12878	0.0828707	0.389445	0.268241	1.13877	1.71478	1.94133	0.0153053	-0.0116823	-0.00343239	-0.260846	0.208756	0.119249
ENSMUSG00000002014	Ssr4	X	+	73787028	73790830	signal sequence receptor, delta [Source:MGI Symbol;Acc:MGI:1099464]	protein_coding	34.8716	24.2406	27.2177	18.2643	47.5549	129.874	21.0752	35.758	9.2513	103.143	19.5425	12.6679	89.6902	272.1	286.351	3.67419	7.50817	2.64917
ENSMUSG00000002015	Bcap31	X	-	73686178	73716175	B cell receptor associated protein 31 [Source:MGI Symbol;Acc:MGI:1350933]	protein_coding	7.72952	19.4349	5.4238	120.481	25.4976	11.4397	84.8707	10.3721	8.58529	58.0853	12.2988	18.2215	74.5533	120.776	106.735	42.1628	7.47718	4.6492
ENSMUSG00000002017	Fam98a	17	-	75537086	75551946	family with sequence similarity 98, member A [Source:MGI Symbol;Acc:MGI:1919972]	protein_coding	18.3515	-0.0474399	3.74174	1.38579	2.759	1.67023	0.284936	3.30326	0.0901051	59.8707	2.45529	2.56274	10.1139	2.55693	6.74013	-0.167746	0.454401	0.16752
ENSMUSG00000002020	Ltbp2	12	-	84783212	84876532	latent transforming growth factor beta binding protein 2 [Source:MGI Symbol;Acc:MGI:99502]	protein_coding	0.311382	2.27917	1.10341	6.04761	57.187	0.629891	0.049377	0.234342	0.407009	2.26033	2.68985	3.37799	0.0217473	-0.0170197	-0.00433852	1.73537	0.539118	0.18426
ENSMUSG00000002028	Kmt2a	9	-	44803355	44881296	lysine (K)-specific methyltransferase 2A [Source:MGI Symbol;Acc:MGI:96995]	protein_coding	3.73511	1.71037	2.21387	5.34717	8.38652	2.12213	5.3775	37.7251	0.405799	3.25739	5.1155	3.80357	2.03745	4.6447	6.11087	3.52976	6.99335	4.56954
ENSMUSG00000002031	Ift46	9	+	44767908	44793447	intraflagellar transport 46 [Source:MGI Symbol;Acc:MGI:1923818]	protein_coding	6.79156	12.2468	3.41828	0.659881	1.12856	5.68511	16.1858	2.73395	0.928486	3.34265	11.4786	11.8454	10.4313	25.8789	4.01618	3.37493	2.23323	-0.0813364
ENSMUSG00000002032	Tmem25	9	-	44793769	44799307	transmembrane protein 25 [Source:MGI Symbol;Acc:MGI:1918937]	protein_coding	5.16338	1.05633	1.55708	0.216992	0.760031	1.05227	0.292355	0.743298	0.101758	2.04628	1.51679	2.63903	-0.0122002	0.870172	0.00018496	-0.300945	0.410259	0.443633
ENSMUSG00000002033	Cd3g	9	-	44969572	44980431	CD3 antigen, gamma polypeptide [Source:MGI Symbol;Acc:MGI:88333]	protein_coding	21.0725	14.2359	23.4081	2.04376	41.8172	19.7564	-0.148693	4.31466	2.94801	12.423	15.9188	32.1797	0.134189	30.088	27.7538	34.5245	12.2668	34.7942
ENSMUSG00000002043	Trappc6a	7	+	19508395	19516145	trafficking protein particle complex 6A [Source:MGI Symbol;Acc:MGI:1914341]	protein_coding	1.06406	1.09477	7.83273	4.25515	19.7993	5.30449	0.2138	14.1379	1.86992	282.793	10.4819	14.3956	0.0598895	-0.0486927	-0.00821261	14.8893	741.859	0.70568
ENSMUSG00000002052	Supt6	11	-	78206746	78245987	SPT6, histone chaperone and transcription elongation factor [Source:MGI Symbol;Acc:MGI:107726]	protein_coding	2.31403	3.94107	3.61284	0.305359	12.0864	1.43839	0.505659	0.573123	6.20177	4.00119	2.76859	4.45103	2.41207	3.34027	1.05626	1.51763	0.406946	0.506538
ENSMUSG00000002055	Spag5	11	+	78301529	78322457	sperm associated antigen 5 [Source:MGI Symbol;Acc:MGI:1927470]	protein_coding	0.550742	8.09388	1.66095	3.25267	2.59398	2.74279	2.20531	0.739513	0.990234	6.51184	5.83666	2.48257	21.9069	11.0578	37.5857	4.1347	1.09557	0.248936
ENSMUSG00000002057	Foxn1	11	-	78357577	78386558	forkhead box N1 [Source:MGI Symbol;Acc:MGI:102949]	protein_coding	0.311723	-0.00445983	0.632441	0.586365	0.179409	0.885774	0.000499024	0.153568	0.323215	1.96649	1.88494	3.27126	0.0218419	-0.0174729	-0.00397145	-0.196086	0.52637	0.138342
ENSMUSG00000002058	Unc119	11	+	78343482	78349164	unc-119 lipid binding chaperone [Source:MGI Symbol;Acc:MGI:1328357]	protein_coding	5.29551	0.798121	0.685737	30.4195	7.11023	17.3819	43.7008	22.1005	3.40487	2.88958	10.0568	9.54305	10.4502	25.2929	38.9496	23.1096	4.10808	24.7093
ENSMUSG00000002059	Rab34	11	+	78188430	78192193	RAB34, member RAS oncogene family [Source:MGI Symbol;Acc:MGI:104606]	protein_coding	0.994642	1.02606	4.95991	2.18033	1.6745	1.48341	0.321734	0.0500026	1.48923	2.73115	6.92274	4.44687	3.56298	0.424849	1.0659	1.24125	3.11279	0.138591
ENSMUSG00000002064	Sdf2	11	+	78245746	78255496	stromal cell derived factor 2 [Source:MGI Symbol;Acc:MGI:108019]	protein_coding	3.2643	6.10707	5.11089	353.205	8.99888	7.3894	43.1736	105.26	1.9097	97.727	6.39993	9.02817	14.2768	31.6509	38.4935	22.7432	3.2303	-0.45857
ENSMUSG00000002068	Ccne1	7	-	38097984	38107534	cyclin E1 [Source:MGI Symbol;Acc:MGI:88316]	protein_coding	0.34382	-0.0655137	1.41398	0.960295	10.7289	2.99303	0.169507	0.130581	0.803464	2.32684	1.57596	4.723	21.9061	9.57345	5.36882	2.39168	1.117	0.732915
ENSMUSG00000002076	Hsf2bp	17	-	31944769	32036349	heat shock transcription factor 2 binding protein [Source:MGI Symbol;Acc:MGI:1921627]	protein_coding	0.224721	2.96652	0.869224	0.697249	0.543447	0.466092	0.527055	0.63782	0.715191	4.32599	2.96652	3.11481	0.651163	0.146754	0.504574	0.893624	0.485156	0.742322
ENSMUSG00000002083	Bbc3	7	+	16308393	16318205	BCL2 binding component 3 [Source:MGI Symbol;Acc:MGI:2181667]	protein_coding	1.41643	4.83144	2.00096	40.8825	3.58897	9.97181	-0.250301	0.265174	1.1541	3.16061	3.16945	5.41102	0.637912	2.06485	8.07986	1.77093	1.90454	4.74683
ENSMUSG00000002100	Mybpc3	2	+	91118144	91136516	myosin binding protein C, cardiac [Source:MGI Symbol;Acc:MGI:102844]	protein_coding	0.315509	-0.0338262	0.685801	0.618026	0.90961	0.693839	0.0775348	0.228248	0.630562	1.30017	1.96327	2.23804	10.335	-0.016978	1.0575	0.612157	0.482948	1.42472
ENSMUSG00000002102	Psmc3	2	+	91054009	91066369	proteasome (prosome, macropain) 26S subunit, ATPase 3 [Source:MGI Symbol;Acc:MGI:1098754]	protein_coding	3.96244	4.37822	120.489	91.2982	169.822	35.5092	13.478	7.1101	50.7298	22.1081	93.0063	18.9673	394.825	338.715	207.419	440.841	58.3589	1.98179
ENSMUSG00000002103	Acp2	2	+	91202885	91214098	acid phosphatase 2, lysosomal [Source:MGI Symbol;Acc:MGI:87882]	protein_coding	19.7795	5.913	3.77733	1.11497	1.47106	22.0759	23.3791	0.542212	0.769311	39.1072	3.2334	6.65613	8.10449	2.43114	5.98136	1.54357	0.88821	0.107145
ENSMUSG00000002104	Rapsn	2	+	91035620	91045729	receptor-associated protein of the synapse [Source:MGI Symbol;Acc:MGI:99422]	protein_coding	0.707958	0.0301319	1.23746	0.704226	0.985476	0.372128	-0.090219	0.789032	0.657413	2.71424	3.42994	3.43647	0.0834203	-0.0350364	-0.00707931	-0.223278	0.697202	-0.0887726
ENSMUSG00000002105	Slc39a13	2	-	91061791	91070417	solute carrier family 39 (metal ion transporter), member 13 [Source:MGI Symbol;Acc:MGI:1915677]	protein_coding	1.3194	1.65835	3.86466	2.47421	0.509862	1.32485	0.149897	1.4133	1.17324	5.0268	14.683	9.01734	6.03593	8.01696	-0.0108247	-0.280941	1.64607	-0.0932057
ENSMUSG00000002107	Celf2	2	-	6539694	7509563	CUGBP, Elav-like family member 2 [Source:MGI Symbol;Acc:MGI:1338822]	protein_coding	82.4038	27.6695	42.4581	62.3157	54.7951	30.3193	17.4279	24.6632	32.0285	38.9485	18.5606	37.1341	57.7791	46.6438	68.6306	24.1851	2.04324	22.744
ENSMUSG00000002108	Nr1h3	2	-	91184061	91202834	nuclear receptor subfamily 1, group H, member 3 [Source:MGI Symbol;Acc:MGI:1352462]	protein_coding	4.84095	11.9737	1.75628	1.68962	4.28714	105.471	0.72265	0.250227	0.903413	8.45885	2.05128	4.96442	0.0161811	-0.00976284	0.159037	-0.603407	0.47813	0.705857
ENSMUSG00000002109	Ddb2	2	-	91211572	91236982	damage specific DNA binding protein 2 [Source:MGI Symbol;Acc:MGI:1355314]	protein_coding	5.22387	-0.118583	2.42937	0.644599	1.19953	1.74422	0.362493	0.154577	0.290519	4.96528	2.67616	3.61622	16.3319	4.89473	-0.00385769	1.3469	0.485528	0.901066
ENSMUSG00000002111	Spi1	2	+	91082390	91115756	spleen focus forming virus (SFFV) proviral integration oncogene [Source:MGI Symbol;Acc:MGI:98282]	protein_coding	53.7631	11.0911	7.37229	27.6637	7.63929	7.23663	4.8324	13.3651	2.49893	44.1068	16.3532	16.0192	53.1678	42.8206	80.5405	14.0159	4.05469	40.3308
ENSMUSG00000002129	Sf3a1	11	+	4160350	4182541	splicing factor 3a, subunit 1 [Source:MGI Symbol;Acc:MGI:1914715]	protein_coding	5.53223	5.76992	4.46133	2.24992	5.02191	11.5889	6.65003	2.88657	1.36088	7.46567	4.22076	7.46594	16.9979	17.1826	13.3121	3.31069	1.46435	0.022075
ENSMUSG00000002147	Stat6	10	+	127642986	127660957	signal transducer and activator of transcription 6 [Source:MGI Symbol;Acc:MGI:103034]	protein_coding	18.36	4.80558	4.29887	2.89915	6.17766	4.01073	23.2416	1.27698	1.99407	5.92943	4.1091	9.25904	6.30442	8.36255	21.2958	2.5193	2.14285	0.633546
ENSMUSG00000002190	Clgn	8	+	83389867	83428552	calmegin [Source:MGI Symbol;Acc:MGI:107472]	protein_coding	2.91168	3.75279	1.97665	0.544163	0.57948	0.672719	0.612622	0.258667	0.274582	1.83017	1.69209	1.3966	-0.0125536	0.0142731	-0.001538	0.841589	0.177729	0.833981
ENSMUSG00000002204	Napsa	7	+	44572380	44586862	napsin A aspartic peptidase [Source:MGI Symbol;Acc:MGI:109365]	protein_coding	3.50691	10.7558	1.13915	2.60038	3.50637	100.668	23.7419	1.35676	12.8008	157.054	16.1705	203.814	26.0113	88.1238	49.3235	1.3397	6.18584	29.9479
ENSMUSG00000002205	Vrk3	7	+	44748413	44777515	vaccinia related kinase 3 [Source:MGI Symbol;Acc:MGI:2182465]	protein_coding	18.6097	13.5684	0.754471	3.88615	12.1997	4.70645	18.3379	3.16433	1.82072	5.48404	33.758	10.1606	25.7859	44.6806	9.4856	7.82944	1.32102	55.1142
ENSMUSG00000002210	Smg9	7	+	24399619	24422778	smg-9 homolog, nonsense mediated mRNA decay factor (C. elegans) [Source:MGI Symbol;Acc:MGI:1919247]	protein_coding	3.7999	10.512	0.56247	1.02723	10.6756	2.45436	22.5089	1.92967	1.10878	3.09728	3.42985	4.09656	0.0446365	7.70899	-0.00583098	0.0708722	1.54	-0.272906
ENSMUSG00000002221	Paxip1	5	-	27740080	27791691	PAX interacting (with transcription-activation domain) protein 1 [Source:MGI Symbol;Acc:MGI:1890430]	protein_coding	1.89833	7.40246	6.94141	0.824873	4.37699	4.43023	1.00705	23.941	0.859397	7.92013	105.685	3.36396	19.2899	5.3831	5.60666	1.05423	90.192	1.89011
ENSMUSG00000002222	Rmnd5a	6	-	71388634	71440637	required for meiotic nuclear division 5 homolog A [Source:MGI Symbol;Acc:MGI:1915727]	protein_coding	11.1144	2.28325	1.55687	0.818544	1.82565	4.33955	0.0987593	0.424396	1.33455	2.34578	3.31948	4.05296	4.52812	5.78276	6.40425	1.81284	0.840328	9.87826
ENSMUSG00000002227	Mov10	3	-	104794836	104818563	Mov10 RISC complex RNA helicase [Source:MGI Symbol;Acc:MGI:97054]	protein_coding	5.67666	1.15258	5.22587	1.41457	1.13313	3.01652	0.164172	3.09505	1.06074	8.24783	3.79515	7.92875	2.77166	0.149009	1.73411	-0.398966	1.37821	0.433468
ENSMUSG00000002228	Ppm1j	3	+	104781056	104786018	protein phosphatase 1J [Source:MGI Symbol;Acc:MGI:1919137]	protein_coding	1.10372	12.15	1.35642	1.27026	0.573985	1.59178	12.1232	1.37228	1.09458	2.844	4.01869	6.00156	0.0614069	0.350687	6.44494	-0.126424	0.917107	-0.0357972
ENSMUSG00000002233	Rhoc	3	+	104788375	104794459	ras homolog family member C [Source:MGI Symbol;Acc:MGI:106028]	protein_coding	1.66166	3.3002	7.7947	1.83987	0.794161	2.68842	2.97408	1.23146	1.35431	3.90264	4.97502	4.59682	0.159718	-0.0643369	0.516556	4.02555	3.29227	-0.115082
ENSMUSG00000002240	Prr27	5	+	87825686	87846387	proline rich 27 [Source:MGI Symbol;Acc:MGI:1921029]	protein_coding	0.119762	-0.0625421	-0.0473736	0.600809	0.278642	0.696371	0.168621	1.60971	0.411262	2.54581	0.318038	1.76922	0.00881158	-0.00588169	-0.0028698	-0.316677	0.190488	0.229276
ENSMUSG00000002249	Tead3	17	-	28331671	28350817	TEA domain family member 3 [Source:MGI Symbol;Acc:MGI:109241]	protein_coding	0.157331	3.42811	0.894211	0.647999	0.751022	1.58811	0.247759	0.151067	0.647682	3.41112	4.80544	5.42188	0.0113663	-0.00740561	-0.00386155	0.0312651	0.873814	0.339704
ENSMUSG00000002250	Ppard	17	+	28232700	28301474	peroxisome proliferator activator receptor delta [Source:MGI Symbol;Acc:MGI:101884]	protein_coding	3.68779	3.86847	1.61808	0.882948	0.606742	1.31925	0.576245	0.728365	0.252896	5.20259	8.42159	6.95641	3.47078	3.92693	3.22811	0.127792	0.918725	1.0452
ENSMUSG00000002257	Def6	17	+	28207778	28228608	differentially expressed in FDCP 6 [Source:MGI Symbol;Acc:MGI:1346328]	protein_coding	7.30442	5.78502	3.93918	0.362657	5.61078	6.52196	16.4851	10.6762	12.7457	8.59716	4.78644	10.8572	16.083	29.2603	19.3707	0.76896	1.27695	0.880171
ENSMUSG00000002265	Peg3	7	-	6703892	6730431	paternally expressed 3 [Source:MGI Symbol;Acc:MGI:104748]	protein_coding	6.43968	2.66287	5.55041	1.18623	1.34993	0.629155	0.81366	0.55105	0.451503	3.48945	3.07603	1.67916	2.50246	0.435539	0.625007	3.62193	1.67451	1.11035
ENSMUSG00000002266	Zim1	7	-	6671269	6696450	zinc finger, imprinted 1 [Source:MGI Symbol;Acc:MGI:1341879]	protein_coding	2.37295	0.874023	1.67247	0.485105	0.293047	2.10172	0.427491	0.0365923	0.378353	2.63295	2.18315	1.30982	0.479089	0.00399404	-0.0024536	0.534883	0.250704	0.647621
ENSMUSG00000002274	Metrn	17	-	25793221	25797136	meteorin, glial cell differentiation regulator [Source:MGI Symbol;Acc:MGI:1917333]	protein_coding	0.839298	4.66437	2.14605	0.656427	2.93239	2.25973	-0.00396401	2.73271	1.91813	5.04389	3.86844	2.44335	0.83114	4.6767	0.924017	-0.320894	1.12837	0.044766
ENSMUSG00000002279	Lmf1	17	+	25579085	25662826	lipase maturation factor 1 [Source:MGI Symbol;Acc:MGI:1923733]	protein_coding	18.038	2.73069	6.79501	1.0716	2.3872	3.85403	-0.0555021	5.59657	0.981151	6.17769	7.96731	13.6237	0.170417	0.0479963	0.0543454	0.31623	25.5251	13.9989
ENSMUSG00000002280	Ciao3	17	+	25773776	25783332	cytosolic iron-sulfur assembly component 3 [Source:MGI Symbol;Acc:MGI:1914813]	protein_coding	1.9967	5.51581	1.3862	0.803183	4.08257	2.57088	0.915295	2.30993	0.777026	5.62226	5.93763	8.64652	3.67291	11.9375	6.29253	2.17982	1.80595	27.9051
ENSMUSG00000002289	Angptl4	17	-	33773750	33781830	angiopoietin-like 4 [Source:MGI Symbol;Acc:MGI:1888999]	protein_coding	2.81349	-0.0046567	3.61441	0.713549	3.7299	1.2058	-0.011081	1.20318	0.812747	3.40343	2.73943	3.57425	0.337658	1.04731	-0.00840688	1.09382	2.83351	0.408483
ENSMUSG00000002297	Dbf4	5	-	8396973	8422716	DBF4 zinc finger [Source:MGI Symbol;Acc:MGI:1351328]	protein_coding	81.4959	15.0235	7.00287	6.9901	9.12461	5.40787	20.9473	35.0922	1.98414	10.2856	11.7826	8.18873	50.246	33.6016	30.3504	6.79694	2.41889	12.8867
ENSMUSG00000002307	Daxx	17	+	33909414	33915590	Fas death domain-associated protein [Source:MGI Symbol;Acc:MGI:1197015]	protein_coding	13.4838	-0.00533197	4.12892	0.527454	6.72365	5.62101	0.303463	2.42162	1.4519	6.06198	5.29339	6.59404	11.464	4.98861	9.10814	-0.234211	0.991423	0.494165
ENSMUSG00000002308	Cd320	17	+	33843091	33849774	CD320 antigen [Source:MGI Symbol;Acc:MGI:1860083]	protein_coding	1.29298	2.71946	2.0082	0.368409	8.08331	0.759538	0.455472	0.482312	0.361015	6.56553	4.50937	3.50081	0.00894178	8.29448	-0.00466146	5.19575	0.356883	1.22383
ENSMUSG00000002319	Ipo4	14	-	55625400	55635957	importin 4 [Source:MGI Symbol;Acc:MGI:1923001]	protein_coding	1.44802	1.80291	1.21501	0.618205	1.59717	0.580217	31.5537	1.67809	1.47629	2.00687	5.47312	3.42598	14.2815	1.85049	5.78483	1.0765	1.05385	-0.257969
ENSMUSG00000002320	Tm9sf1	14	-	55635965	55643806	transmembrane 9 superfamily member 1 [Source:MGI Symbol;Acc:MGI:1921390]	protein_coding	1.31813	0.20102	3.67714	0.702624	3.84216	2.56364	42.1409	5.07984	1.56752	5.13852	3.57011	6.15155	0.0700286	42.57	-0.00847727	6.79638	1429.57	-0.404483
ENSMUSG00000002324	Rec8	14	+	55618037	55625395	REC8 meiotic recombination protein [Source:MGI Symbol;Acc:MGI:1929645]	protein_coding	0.436928	-0.0310968	0.743136	0.310571	0.946398	0.55052	0.184798	0.194464	0.5002	1.89833	2.4261	4.60235	0.0291884	-0.0226963	-0.00579578	-0.336329	1.14507	0.107359
ENSMUSG00000002325	Irf9	14	+	55603571	55610030	interferon regulatory factor 9 [Source:MGI Symbol;Acc:MGI:107587]	protein_coding	0.840255	2.26304	4.41097	90.8016	6.62252	3.53227	-0.0132872	0.782554	1.29938	4.53489	6.09309	5.97602	5.58313	12.0581	21.5225	1.45437	0.919614	0.187553
ENSMUSG00000002326	Gmpr2	14	+	55671941	55679200	guanosine monophosphate reductase 2 [Source:MGI Symbol;Acc:MGI:1917903]	protein_coding	32.236	9.5857	2.233	0.498798	1.35087	0.658958	-0.0697612	1.57682	0.521745	2.93109	2.33882	4.35857	0.0831484	-0.0217068	7.46864	5.90461	1.66768	62.6822
ENSMUSG00000002329	Mdp1	14	-	55657879	55660508	magnesium-dependent phosphatase 1 [Source:MGI Symbol;Acc:MGI:1915131]	protein_coding	4.17964	2.86913	5.12996	2.56446	5.86494	8.73013	0.0889731	6.00469	212.439	22.0616	3.58021	6.52413	24.5689	10.9186	10.0996	13.0613	1.04059	49.2515
ENSMUSG00000002332	Dhrs1	14	-	55739020	55745690	dehydrogenase/reductase (SDR family) member 1 [Source:MGI Symbol;Acc:MGI:1196314]	protein_coding	3.67133	7.08471	1.84283	1.0545	4.67909	6.52741	-0.588634	1.43594	2.6321	3.40491	3.3665	8.51277	3.38857	4.61585	30.467	1.45042	2.03704	34.6463
ENSMUSG00000002341	Ncan	8	-	70093085	70120873	neurocan [Source:MGI Symbol;Acc:MGI:104694]	protein_coding	0.566578	0.658752	0.894177	0.57326	0.228744	0.668953	0.193472	0.279074	0.349249	2.29792	2.28298	2.04764	0.102155	0.544726	0.0132826	0.152953	0.248228	0.347068
ENSMUSG00000002342	Tmem161a	8	+	70172356	70183681	transmembrane protein 161A [Source:MGI Symbol;Acc:MGI:2384577]	protein_coding	0.806232	4.343	2.25426	1.40173	2.18562	3.03971	-0.078192	1.50465	0.767286	39.0324	3.86624	2.37444	10.0729	0.843238	1.21571	2.20516	1.86346	0.115117
ENSMUSG00000002343	Armc6	8	-	70220172	70234466	armadillo repeat containing 6 [Source:MGI Symbol;Acc:MGI:1924063]	protein_coding	-0.135807	-0.100614	0.286598	30.5683	2.38246	1.39035	0.308398	0.675563	0.817912	2.77686	2.92712	1.6864	0.0625852	0.336482	40.444	1.17556	0.533406	0.401935
ENSMUSG00000002345	Borcs8	8	+	70139499	70147319	BLOC-1 related complex subunit 8 [Source:MGI Symbol;Acc:MGI:1919618]	protein_coding	2.25655	0.862054	2.31393	0.0261053	4.19115	14.3258	21.7526	21.3868	0.540169	1.31416	685.71	17.7511	39.4708	59.3701	61.9705	6.48306	478.488	7.37133
ENSMUSG00000002346	Slc25a42	8	-	70184340	70212305	solute carrier family 25, member 42 [Source:MGI Symbol;Acc:MGI:1920345]	protein_coding	0.612438	1.71684	1.21434	1.14285	0.830746	1.87144	-0.0393768	0.783774	1.01379	5.9998	3.31464	3.33646	0.126735	-0.0309302	-0.00666357	-0.0902595	0.864846	0.794485
ENSMUSG00000002365	Snx9	17	+	5841329	5931954	sorting nexin 9 [Source:MGI Symbol;Acc:MGI:1913866]	protein_coding	7.91768	-0.00847309	6.57388	0.741562	4.26988	2.03418	0.340703	0.302252	1.21371	9.28598	5.1017	4.56904	0.0483317	5.05333	3.01548	2.97291	1.98887	0.186879
ENSMUSG00000002372	Ranbp3	17	+	56673294	56711764	RAN binding protein 3 [Source:MGI Symbol;Acc:MGI:1919060]	protein_coding	2.55565	1.1138	4.72597	4.77791	10.1007	1.36693	1.04335	40.3976	2.0936	7.62464	7.18677	4.11994	5.12403	-0.0394769	65.581	0.400906	3.37265	0.547853
ENSMUSG00000002379	Ndufa11	17	+	56717767	56722141	NADH:ubiquinone oxidoreductase subunit A11 [Source:MGI Symbol;Acc:MGI:1917125]	protein_coding	56.9335	6.99664	12.0689	31.2683	27.0821	272.396	158.751	11.1114	4.50142	221.845	384.009	1005.78	487.965	428.534	179.904	42.2732	18.5425	59.3036
ENSMUSG00000002384	Bmp8b	4	+	123105165	123132099	bone morphogenetic protein 8b [Source:MGI Symbol;Acc:MGI:107335]	protein_coding	0.272281	2.93756	0.600322	1.06458	0.277304	0.609296	0.369757	2.36256	0.695926	3.36262	3.25243	2.37111	0.0240105	-0.00508778	-0.00596688	-0.102575	0.566671	0.648555
ENSMUSG00000002393	Nr2f6	8	-	71374123	71381960	nuclear receptor subfamily 2, group F, member 6 [Source:MGI Symbol;Acc:MGI:1352453]	protein_coding	0.594268	3.57943	2.3135	0.548154	1.12961	1.43137	-0.132859	0.77216	0.763855	3.45809	1.51772	3.15078	8.16282	0.484721	1.06273	-0.102468	1.39969	-0.146469
ENSMUSG00000002395	Use1	8	+	71366848	71369732	unconventional SNARE in the ER 1 homolog (S. cerevisiae) [Source:MGI Symbol;Acc:MGI:1914273]	protein_coding	4.00923	7.19407	10.0143	36.0562	22.0877	9.18668	-0.0949803	5.3579	9.13273	10.6928	16.8968	16.7051	299.796	37.6604	33.7771	36.8624	15.8675	97.1776
ENSMUSG00000002396	Ocel1	8	+	71371298	71379361	occludin/ELL domain containing 1 [Source:MGI Symbol;Acc:MGI:1924340]	protein_coding	0.344543	0.00615316	1.29346	11.467	3.20837	3.23627	-0.0264206	3.0685	2.44533	154.624	6.54117	5.91043	3.12172	23.971	8.086	1.70684	0.315238	-0.0184297
ENSMUSG00000002409	Dyrk1b	7	+	28179469	28187294	dual-specificity tyrosine-(Y)-phosphorylation regulated kinase 1b [Source:MGI Symbol;Acc:MGI:1330302]	protein_coding	5.43345	3.00382	2.48116	1.19478	0.522048	2.96991	0.274166	0.379453	0.284628	3.35506	2.72766	2.86935	0.538908	0.12956	0.860462	0.0224258	0.154365	1.02496
ENSMUSG00000002413	Braf	6	-	39603237	39725463	Braf transforming gene [Source:MGI Symbol;Acc:MGI:88190]	protein_coding	7.56342	4.12208	3.80751	0.775091	20.7567	1.38812	3.06429	1.12229	0.659981	4.51238	4.57572	2.42827	6.8039	1.92507	2.0511	2.78617	0.756154	0.550857
ENSMUSG00000002416	Ndufb2	6	+	39592574	39603382	NADH:ubiquinone oxidoreductase subunit B2 [Source:MGI Symbol;Acc:MGI:1915448]	protein_coding	16.6663	11.2716	29.8703	428.461	44.7798	145.401	33.7259	1134.35	80.155	56.8902	9.96382	13.2634	234.458	252.35	97.9668	12.5384	3.90952	16.6786
ENSMUSG00000002428	Hltf	3	+	20057811	20118490	helicase-like transcription factor [Source:MGI Symbol;Acc:MGI:1196437]	protein_coding	20.8329	7.25178	4.1884	24.3701	3.08588	1.18116	17.4154	35.3033	0.931482	3.38257	3.39303	2.10183	18.1589	5.20147	27.5891	3.35179	2.1827	4.726
ENSMUSG00000002455	Prpf6	2	+	181591868	181655660	pre-mRNA splicing factor 6 [Source:MGI Symbol;Acc:MGI:1922946]	protein_coding	1.35547	5.73066	3.37981	6.61221	4.38941	3.35927	0.813005	0.526196	1.49577	2.89789	4.74017	6.37913	26.9104	18.5984	24.9469	4.5209	9.31163	17.2468
ENSMUSG00000002458	Rgs19	2	-	181688419	181693977	regulator of G-protein signaling 19 [Source:MGI Symbol;Acc:MGI:1915153]	protein_coding	51.4839	0.73195	0.924616	15.4711	7.19491	9.00779	22.612	21.6024	4.58596	18.7714	8.06688	24.3255	92.2981	59.1525	102.946	2.24606	5.43981	50.1654
ENSMUSG00000002459	Rgs20	1	-	4909576	5070285	regulator of G-protein signaling 20 [Source:MGI Symbol;Acc:MGI:1929866]	protein_coding	0.565791	1.50615	1.91873	2.47135	0.719518	1.50341	1.0442	1.03812	1.31731	5.16126	4.61839	5.14013	0.0359886	-0.0266107	-0.00834995	2.37545	1.51577	0.602338
ENSMUSG00000002475	Abhd3	18	-	10642092	10706771	abhydrolase domain containing 3 [Source:MGI Symbol;Acc:MGI:2147183]	protein_coding	4.64789	-0.17898	1.1061	0.357633	1.81928	2.07889	0.643169	0.622245	0.135398	2.68918	2.07418	4.72342	-0.015575	0.016967	-0.00112643	-0.0774062	0.157083	0.874947
ENSMUSG00000002477	Snrpd1	18	+	10617775	10642079	small nuclear ribonucleoprotein D1 [Source:MGI Symbol;Acc:MGI:98344]	protein_coding	23.1264	0.238233	30.8561	171.249	112.826	226.085	48.4298	32.2424	32.302	28.5955	756.038	26.3665	287.68	241.803	321.581	273.348	16.7428	48.7237
ENSMUSG00000002486	Tchp	5	+	114707760	114722327	trichoplein, keratin filament binding [Source:MGI Symbol;Acc:MGI:1925082]	protein_coding	12.4387	0.451099	3.14958	1.60649	2.27303	11.0671	0.702639	0.893718	2.64257	10.6279	7.75476	4.55606	0.516507	9.18537	24.1873	1.24913	1.01998	1.05244
ENSMUSG00000002489	Tiam1	16	-	89787111	90143769	T cell lymphoma invasion and metastasis 1 [Source:MGI Symbol;Acc:MGI:103306]	protein_coding	2.20361	0.506192	4.30635	3.34847	7.8098	2.44082	0.0112946	0.416113	1.16528	4.85415	6.20459	4.1922	17.2148	14.7225	6.85074	0.996538	0.515857	0.134211
ENSMUSG00000002496	Tsc2	17	-	24595816	24632630	TSC complex subunit 2 [Source:MGI Symbol;Acc:MGI:102548]	protein_coding	19.4088	2.31656	7.3149	11.9334	3.78146	4.11391	1.16738	1.15865	0.22553	9.96246	9.47756	9.35234	1.6559	1.03353	4.64113	1.99602	3.10014	1.69755
ENSMUSG00000002500	Rpl3l	17	+	24727820	24736143	ribosomal protein L3-like [Source:MGI Symbol;Acc:MGI:1913461]	protein_coding	0.324193	-0.0959649	-0.16466	0.816003	0.342476	1.25755	14.2089	0.205378	0.613513	2.61204	3.65183	2.29236	0.0222443	1.64858	-0.00596505	3.99409	1.38339	0.380992
ENSMUSG00000002504	Slc9a3r2	17	-	24639286	24650327	solute carrier family 9 (sodium/hydrogen exchanger), member 3 regulator 2 [Source:MGI Symbol;Acc:MGI:1890662]	protein_coding	1.01058	0.146208	-0.17299	0.385218	0.379266	1.01501	26.4524	0.22608	0.714818	1.65727	3.65337	6.48426	0.680644	0.00697675	0.268896	0.82648	1.32391	-0.12647
ENSMUSG00000002524	Puf60	15	-	76070182	76080924	poly-U binding splicing factor 60 [Source:MGI Symbol;Acc:MGI:1915209]	protein_coding	25.3321	17.8631	13.9544	148.334	24.6103	48.1774	54.0165	46.9822	21.9489	87.9733	270.606	83.1576	44.4138	29.5122	53.7753	46.7014	23.1028	26.0168
ENSMUSG00000002546	Golga2	2	+	32287384	32307921	golgi autoantigen, golgin subfamily a, 2 [Source:MGI Symbol;Acc:MGI:2139395]	protein_coding	7.45172	0.00719993	0.982032	5.54775	1.99849	0.933502	20.5436	3.37244	0.906714	2.29689	3.38332	7.37321	0.904616	4.44585	-0.00454645	2.22463	1.71891	0.964803
ENSMUSG00000002550	Uck1	2	-	32255002	32260159	uridine-cytidine kinase 1 [Source:MGI Symbol;Acc:MGI:98904]	protein_coding	1.80669	0.152119	3.24388	1.31265	6.97114	4.18175	-0.108025	1.83595	1.4569	35.5182	1.90479	7.41515	4.28291	13.9502	6.73687	-0.0927168	3.12711	-0.225174
ENSMUSG00000002565	Scin	12	-	40059769	40134228	scinderin [Source:MGI Symbol;Acc:MGI:1306794]	protein_coding	0.647888	8.5298	3.64405	0.680841	1.54515	1.03753	0.0490362	-0.44381	0.713905	1.72039	3.58216	2.65462	0.0405024	-0.0315048	-0.00766243	0.693042	0.493255	0.148157
ENSMUSG00000002578	Ikzf4	10	-	128630843	128669358	IKAROS family zinc finger 4 [Source:MGI Symbol;Acc:MGI:1343139]	protein_coding	0.985241	1.81458	3.07091	0.805958	1.44405	0.664918	0.108591	0.2852	1.42039	3.93285	3.90849	3.54303	0.260711	-0.012833	0.518864	0.611033	0.847075	0.100097
ENSMUSG00000002580	Mien1	11	-	98437708	98438991	migration and invasion enhancer 1 [Source:MGI Symbol;Acc:MGI:1913678]	protein_coding	5.55304	0.915104	2.16501	136.63	15.8414	11.7267	55.6314	14.3397	2.0193	2.36392	1015.67	10.3846	67.092	83.0685	59.1174	86.8507	5.96366	30.2233
ENSMUSG00000002588	Pon1	6	-	5168090	5193946	paraoxonase 1 [Source:MGI Symbol;Acc:MGI:103295]	protein_coding	0.0185149	2.60468	0.182735	0.619521	1.84928	0.311233	0.58599	0.397911	0.280206	3.74088	6.29684	2.9136	0.000766585	0.00310835	5.81095	1.25756	0.697669	0.997896
ENSMUSG00000002602	Axl	7	-	25757273	25788705	AXL receptor tyrosine kinase [Source:MGI Symbol;Acc:MGI:1347244]	protein_coding	25.415	20.4566	9.96276	159.087	4.5913	11.8396	-0.347005	9.15101	0.891361	75.6279	215.92	15.0746	0.742603	0.843732	0.4188	4.29881	2.58762	62.2706
ENSMUSG00000002603	Tgfb1	7	+	25687002	25705077	transforming growth factor, beta 1 [Source:MGI Symbol;Acc:MGI:98725]	protein_coding	4.73579	4.54348	3.32125	1.72874	7.40936	3.7937	0.92221	3.34561	3.56601	23.7877	10.2287	8.29541	19.1744	20.209	18.4517	4.89336	2.57839	11.1971
ENSMUSG00000002608	Ccdc97	7	-	25711106	25719088	coiled-coil domain containing 97 [Source:MGI Symbol;Acc:MGI:1196455]	protein_coding	4.27899	7.76787	2.12469	0.377195	16.5215	9.77101	19.0725	1.62582	0.35906	2.58729	2.23193	8.33476	12.1484	7.13024	1.48634	5.80521	5.04623	-0.276589
ENSMUSG00000002617	Zfp40	17	-	23173869	23193252	zinc finger protein 40 [Source:MGI Symbol;Acc:MGI:99185]	protein_coding	4.95799	4.85825	2.36061	0.49629	0.691759	0.538141	0.402825	0.673369	0.0411494	3.7681	1.92741	1.95299	0.0591824	0.0112229	1.00916	-0.17828	0.108461	0.626833
ENSMUSG00000002625	Akap8l	17	-	32321424	32350607	A kinase (PRKA) anchor protein 8-like [Source:MGI Symbol;Acc:MGI:1860606]	protein_coding	5.69781	5.00674	1.95661	0.805802	7.17134	17.7848	-0.379086	4.29606	0.646747	61.4724	4.40705	11.5629	2.4416	2.84824	2.43765	5.81253	2.82567	21.9751
ENSMUSG00000002633	Shh	5	-	28456815	28467256	sonic hedgehog [Source:MGI Symbol;Acc:MGI:98297]	protein_coding	0.57263	0.0128903	1.98058	0.90685	0.308078	0.994215	-0.0482475	0.251457	0.88445	1.45048	1.61644	1.32311	0.0367884	-0.0294387	-0.00622771	-0.237036	0.57426	-0.0386152
ENSMUSG00000002635	Pdcd2l	7	-	34184499	34196661	programmed cell death 2-like [Source:MGI Symbol;Acc:MGI:1915329]	protein_coding	2.50482	6.30121	1.72323	2.18446	285.485	48.8767	18.6839	1.18118	5.23947	7.79071	6.90113	6.42895	17.8181	25.9771	11.6232	4.64183	8.21562	0.736085
ENSMUSG00000002658	Gtf2f1	17	-	57003405	57011288	general transcription factor IIF, polypeptide 1 [Source:MGI Symbol;Acc:MGI:1923848]	protein_coding	14.3382	9.36653	3.87946	45.3745	6.86121	15.7606	-0.482698	2.74671	1.36218	18.6357	5.00436	8.41766	26.7985	5.92372	20.715	0.67447	1.75049	38.1906
ENSMUSG00000002660	Clpp	17	+	56990305	56996188	caseinolytic mitochondrial matrix peptidase proteolytic subunit [Source:MGI Symbol;Acc:MGI:1858213]	protein_coding	18.2994	0.331857	4.47684	0.705818	15.5745	5.50419	68.0295	3.42293	2.8697	3.74955	3.96354	10.0322	143.636	17.9931	36.3099	1.06595	8.01314	-0.0982172
ENSMUSG00000002661	Alkbh7	17	+	56997339	56999322	alkB homolog 7 [Source:MGI Symbol;Acc:MGI:1913650]	protein_coding	1.56823	0.123486	2.46507	0.478149	2.81901	1.1212	-0.277985	0.093937	1.25149	2.05469	5.51013	5.88732	0.078532	45.8373	8.28249	-0.138363	1.81273	-0.30816
ENSMUSG00000002664	Pspn	17	-	56999457	57000018	persephin [Source:MGI Symbol;Acc:MGI:1201684]	protein_coding	-0.010802	-0.0456616	0.0592889	0.0693163	0.0527767	0.438687	0.123428	-0.150192	0.0474523	1.29944	1.26345	1.10681	-0.00103961	0.00179134	-0.000749307	-0.187825	0.060733	0.160765
ENSMUSG00000002668	Dennd1c	17	-	57065905	57078514	DENN/MADD domain containing 1C [Source:MGI Symbol;Acc:MGI:1918035]	protein_coding	1.609	11.2396	3.59664	94.5757	3.79179	6.12387	1.95637	4.8659	1.76645	1.67854	10.3339	20.0294	2.76127	24.8301	14.1828	5.27772	1.39915	12.8109
ENSMUSG00000002679	Med6	12	-	81573557	81595008	mediator complex subunit 6 [Source:MGI Symbol;Acc:MGI:1917042]	protein_coding	22.2709	3.04587	3.67654	0.985236	11.0454	1.56997	77.2296	1.81555	1.54797	2.77143	5.3339	3.00635	23.0816	16.5691	25.9266	10.2033	1.20907	0.117663
ENSMUSG00000002688	Prkd1	12	-	50341231	50649098	protein kinase D1 [Source:MGI Symbol;Acc:MGI:99879]	protein_coding	0.322975	-0.0347104	0.741132	0.382043	1.10344	0.351146	0.0797468	0.352024	0.38621	1.6641	2.44616	1.94528	0.22559	-0.0173207	-0.00468864	0.279805	0.288439	0.120336
ENSMUSG00000002699	Lcp2	11	+	34046920	34092295	lymphocyte cytosolic protein 2 [Source:MGI Symbol;Acc:MGI:1321402]	protein_coding	6.64721	17.3647	17.8102	52.4296	41.7177	106.436	51.656	20.7557	18.546	6.50209	6.31985	40.8742	23.4542	33.5862	39.2206	47.7252	242.339	29.2546
ENSMUSG00000002718	Cse1l	2	+	166906040	166946389	chromosome segregation 1-like (S. cerevisiae) [Source:MGI Symbol;Acc:MGI:1339951]	protein_coding	12.1984	20.2382	2.53355	2.26814	8.19021	4.76463	3.05323	3.2111	1.40764	9.88395	5.52575	7.04706	67.9821	50.3577	46.0757	2.91279	1.74057	10.6878
ENSMUSG00000002728	Naa20	2	+	145902099	145916425	N(alpha)-acetyltransferase 20, NatB catalytic subunit [Source:MGI Symbol;Acc:MGI:1915127]	protein_coding	22.038	16.2512	7.23801	0.560018	8.84878	7.97236	53.6512	9.51564	4.00191	90.3129	12.4482	15.0697	84.8088	69.2284	62.352	28.3535	1292.77	21.4245
ENSMUSG00000002731	Prkra	2	-	76629898	76648015	protein kinase, interferon inducible double stranded RNA dependent activator [Source:MGI Symbol;Acc:MGI:1344375]	protein_coding	1.01881	3.78706	3.56388	1.77821	5.95013	1.16259	0.0919718	0.67525	1.37093	1.76172	7.17289	1.64974	3.10193	19.5801	24.0444	2.10042	0.778604	0.284401
ENSMUSG00000002732	Fkbp7	2	-	76663044	76673116	FK506 binding protein 7 [Source:MGI Symbol;Acc:MGI:1336879]	protein_coding	0.470997	0.0795835	2.47737	40.5833	5.7342	3.02118	-0.1854	2.86092	0.345251	3.98439	2.43009	4.18171	0.0315289	10.0758	-0.0040452	0.0754608	0.364142	-0.215768
ENSMUSG00000002733	Plekha3	2	+	76675281	76696828	pleckstrin homology domain-containing, family A (phosphoinositide binding specific) member 3 [Source:MGI Symbol;Acc:MGI:1932515]	protein_coding	1.83125	7.41482	1.86653	24.2797	4.27755	1.73421	-0.342897	1.62926	1.26663	3.98108	2.95307	5.73274	18.8159	9.54315	10.5731	4.17415	1.6784	28.2753
ENSMUSG00000002741	Ykt6	11	+	5955693	5967780	YKT6 v-SNARE homolog (S. cerevisiae) [Source:MGI Symbol;Acc:MGI:1927550]	protein_coding	3.64093	64.1318	1.24406	9.78457	48.0465	1.56723	7.18111	4.4015	2.96464	1.71369	5.13176	4.44593	31.2404	24.594	31.2842	4.60193	1.62471	21.8792
ENSMUSG00000002748	Baz1b	5	+	135187264	135246129	bromodomain adjacent to zinc finger domain, 1B [Source:MGI Symbol;Acc:MGI:1353499]	protein_coding	32.3362	12.7666	4.94706	7.69174	2.89113	4.77919	14.1847	3.25881	0.685123	6.70548	6.35191	13.2661	21.5709	20.6535	11.6415	11.8693	0.897087	13.5347
ENSMUSG00000002763	Pex6	17	+	46711463	46725541	peroxisomal biogenesis factor 6 [Source:MGI Symbol;Acc:MGI:2385054]	protein_coding	0.442073	1.00237	2.49982	0.766571	1.67622	2.82259	26.0218	3.29837	43.1277	3.2569	3.62505	2.22893	10.4972	6.0014	5.97379	4.10434	1.67839	0.111002
ENSMUSG00000002767	Mrpl2	17	+	46646229	46650139	mitochondrial ribosomal protein L2 [Source:MGI Symbol;Acc:MGI:1351622]	protein_coding	0.890523	17.081	6.4142	198.227	10.3085	5.16363	0.298877	6.38136	2.27908	12.6191	4.83769	6.26169	95.4868	65.8636	56.7501	1.47472	3.91083	0.698803
ENSMUSG00000002768	Mea1	17	+	46678793	46683111	male enhanced antigen 1 [Source:MGI Symbol;Acc:MGI:96957]	protein_coding	5.85243	12.931	58.6156	145.839	11.4315	187.572	20.388	7.82109	741.335	269.623	11.6949	13.2178	63.5662	37.9061	20.4337	8.51459	2.06405	0.404562
ENSMUSG00000002769	Gnmt	17	-	46725664	46729168	glycine N-methyltransferase [Source:MGI Symbol;Acc:MGI:1202304]	protein_coding	0.310548	-0.0409408	0.240953	0.519092	0.0981429	0.277351	0.0976387	0.75509	0.383988	1.59209	2.51263	2.09293	0.0216264	-0.0165674	-0.00467874	-0.323016	0.291558	0.143688
ENSMUSG00000002771	Grin2d	7	-	45831883	45878378	glutamate receptor, ionotropic, NMDA2D (epsilon 4) [Source:MGI Symbol;Acc:MGI:95823]	protein_coding	1.24467	-0.0824408	0.913408	0.559284	0.153315	0.590743	1.08644	0.255448	0.615921	2.37002	2.43255	4.89654	0.0207844	0.253467	0.0799491	0.402501	0.367671	0.392215
ENSMUSG00000002778	Kdelr1	7	+	45872772	45883732	KDEL (Lys-Asp-Glu-Leu) endoplasmic reticulum protein retention receptor 1 [Source:MGI Symbol;Acc:MGI:1915387]	protein_coding	1.88782	3.02825	5.26199	3.53337	7.3776	52.8921	0.199613	1.24781	2.17868	3.20171	616.336	4.92237	30.0435	15.2049	35.6445	0.857133	3.12962	1.50292
ENSMUSG00000002781	Tmem143	7	+	45896941	45917413	transmembrane protein 143 [Source:MGI Symbol;Acc:MGI:1917459]	protein_coding	0.348949	4.21133	1.82692	0.781023	0.460924	1.99609	0.168634	1.24545	1.23672	4.6703	4.92413	4.16033	0.0238819	0.00393259	-0.00558653	0.345711	0.439275	0.345087
ENSMUSG00000002791	Pdxk-ps	17	-	32076083	32107350	pyridoxal (pyridoxine, vitamin B6) kinase, pseudogene [Source:MGI Symbol;Acc:MGI:1933201]	transcribed_unprocessed_pseudogene	4.99359	-0.201686	0.678218	0.545786	0.230057	2.30729	0.768794	0.15678	-0.0193711	3.36133	1.73788	2.71991	-0.0238604	0.0246154	-0.000167619	1.84972	0.26897	2.12274
ENSMUSG00000002797	Ggct	6	-	54982580	54992950	gamma-glutamyl cyclotransferase [Source:MGI Symbol;Acc:MGI:95700]	protein_coding	3.28996	2.33007	3.68368	1.26334	3.13157	2.26095	0.5064	0.87209	1.3541	11.623	4.88235	6.19731	0.0191783	6.10345	0.192946	2.08847	1.76354	0.603751
ENSMUSG00000002799	Jag2	12	-	112907819	112929776	jagged 2 [Source:MGI Symbol;Acc:MGI:1098270]	protein_coding	0.519948	2.05755	1.39806	1.02214	0.86743	1.6354	0.305348	1.00047	0.92264	7.13438	5.05716	3.69859	0.0639348	0.027232	0.0475632	0.726898	0.879969	0.601452
ENSMUSG00000002803	Btbd6	12	+	112976482	112978945	BTB (POZ) domain containing 6 [Source:MGI Symbol;Acc:MGI:3026623]	protein_coding	1.17078	0.10768	0.04844	0.944833	2.1621	2.21892	11.6399	1.6742	0.932551	2.35772	4.86819	2.73772	0.0641212	-0.0516303	-0.00909686	0.264117	0.515413	-0.22304
ENSMUSG00000002804	Nudt14	12	-	112934291	112942124	nudix (nucleoside diphosphate linked moiety X)-type motif 14 [Source:MGI Symbol;Acc:MGI:1913424]	protein_coding	2.83887	10.9238	0.468033	9.18682	4.27169	5.23913	2.73103	1.0412	1.31281	1.31148	2.38426	7.38862	5.03303	8.30661	32.6448	1.68791	1.17697	19.0116
ENSMUSG00000002808	Epdr1	13	-	19591706	19619927	ependymin related protein 1 (zebrafish) [Source:MGI Symbol;Acc:MGI:2145369]	protein_coding	0.530208	-0.00126748	0.805154	0.85233	3.47404	2.45567	0.110606	0.165454	0.936756	1.52566	2.22676	1.81772	0.0344771	-0.0273865	-0.00610883	-0.270699	0.586813	0.00545507
ENSMUSG00000002812	Flii	11	-	60714123	60727263	flightless I actin binding protein [Source:MGI Symbol;Acc:MGI:1342286]	protein_coding	2.10944	23.2258	3.48138	15.5093	3.31681	6.93125	15.9583	4.09158	1.32727	6.24544	4.48355	12.8171	16.3359	6.76172	12.9486	1.52078	1.56064	-0.183473
ENSMUSG00000002814	Top3a	11	-	60740058	60777365	topoisomerase (DNA) III alpha [Source:MGI Symbol;Acc:MGI:1197527]	protein_coding	0.581357	2.44371	1.07708	0.779439	1.00532	1.03795	0.0927543	0.133785	0.909962	4.24796	3.26522	1.80685	1.18684	0.086607	0.935171	0.433235	0.641076	0.240772
ENSMUSG00000002820	Atg4d	9	+	21265293	21277772	autophagy related 4D, cysteine peptidase [Source:MGI Symbol;Acc:MGI:2444308]	protein_coding	1.02058	6.96536	2.17498	2.39853	4.70777	1.68861	0.156059	2.17307	1.05098	8.69472	6.36994	4.45971	1.33387	4.9617	2.44315	0.673358	1.09446	0.386897
ENSMUSG00000002825	Qtrt1	9	+	21411837	21420274	queuine tRNA-ribosyltransferase catalytic subunit 1 [Source:MGI Symbol;Acc:MGI:1931441]	protein_coding	1.47293	0.127779	3.6509	0.435856	5.26784	3.46759	-0.28373	3.66069	1.60392	162.729	5.16573	4.63125	0.0753023	18.1345	3.02215	2.29259	1.75411	-0.178269
ENSMUSG00000002831	Plin4	17	-	56100591	56109803	perilipin 4 [Source:MGI Symbol;Acc:MGI:1929709]	protein_coding	0.310774	-0.0300655	0.532329	0.695166	0.439257	1.12828	0.0673489	0.428257	0.647511	1.39115	1.8542	2.66881	0.0216835	-0.0168346	-0.00446376	-0.286899	0.271058	0.19594
ENSMUSG00000002833	Hdgfl2	17	+	56079634	56100607	HDGF like 2 [Source:MGI Symbol;Acc:MGI:1194492]	protein_coding	4.78502	11.4887	4.43622	116.763	8.49555	3.43306	49.3621	297.529	90.0868	15.2307	10.6799	11.1192	42.5289	66.1413	47.06	2.02254	2.03799	10.4914
ENSMUSG00000002835	Chaf1a	17	+	56040439	56072289	chromatin assembly factor 1, subunit A (p150) [Source:MGI Symbol;Acc:MGI:1351331]	protein_coding	0.0704867	2.00558	2.16456	0.245219	2.07579	1.47976	0.143484	1.72737	50.0987	1.72317	2.41532	3.84518	0.151056	8.78461	-0.000936388	-0.0391917	0.620036	1.7475
ENSMUSG00000002844	Adprh	16	-	38444030	38452703	ADP-ribosylarginine hydrolase [Source:MGI Symbol;Acc:MGI:1098234]	protein_coding	4.33853	6.45309	1.46279	1.38054	52.2334	1.7504	14.6448	6.67998	3.66471	20.5615	6.94827	6.99154	31.7614	9.56517	18.6137	6.10704	4.49957	2.78512
ENSMUSG00000002845	Tmem39a	16	+	38558698	38592162	transmembrane protein 39a [Source:MGI Symbol;Acc:MGI:1915096]	protein_coding	8.17145	-0.194869	17.8226	0.930274	4.45257	1.79796	0.741812	2.34619	55.3994	6.71117	3.20828	9.73354	5.35749	18.6439	42.007	4.07879	1.48013	1.4353
ENSMUSG00000002846	Timmdc1	16	-	38498347	38522663	translocase of inner mitochondrial membrane domain containing 1 [Source:MGI Symbol;Acc:MGI:1922139]	protein_coding	7.45041	-0.0887081	4.51436	1.15175	2.10989	1.67538	0.789559	-0.0850942	0.808446	4.85228	4.95778	5.08637	21.5335	2.72663	3.15638	2.86337	0.349376	0.567647
ENSMUSG00000002847	Pla1a	16	-	38396117	38433145	phospholipase A1 member A [Source:MGI Symbol;Acc:MGI:1934677]	protein_coding	9.42081	7.43143	2.89389	0.609295	1.23002	0.69682	0.260837	0.664474	0.113292	1.73296	2.75993	1.9261	2.99971	0.00262274	-0.00170437	-0.346852	0.136879	0.803255
ENSMUSG00000002870	Mcm2	6	-	88883474	88898780	minichromosome maintenance complex component 2 [Source:MGI Symbol;Acc:MGI:105380]	protein_coding	5.07551	9.65108	7.46511	0.783085	21.2611	8.1562	0.646814	13.0761	0.455202	16.2593	11.0769	13.6403	48.8547	20.4804	30.4137	6.5461	2.53765	0.27046
ENSMUSG00000002871	Tpra1	6	+	88902251	88912238	transmembrane protein, adipocyte asscociated 1 [Source:MGI Symbol;Acc:MGI:1345190]	protein_coding	11.7011	0.420813	8.43923	14.4846	2.45208	3.48369	2.25685	1.27197	1.31408	2.76628	4.72435	10.8915	0.429749	7.85064	3.74613	0.585872	1.79423	0.504352
ENSMUSG00000002881	Nab1	1	-	52457294	52500679	Ngfi-A binding protein 1 [Source:MGI Symbol;Acc:MGI:107564]	protein_coding	6.72822	6.54847	7.9286	7.37518	5.323	8.7151	6.97606	4.13218	54.159	2.1705	4.25815	9.63246	13.0834	14.8111	7.30755	10.1936	0.334811	14.1655
ENSMUSG00000002885	Adgre5	8	-	83723251	83741326	adhesion G protein-coupled receptor E5 [Source:MGI Symbol;Acc:MGI:1347095]	protein_coding	12.63	12.9707	1.95491	31.858	75.9255	23.1959	11.8216	8.69549	1.50608	6.43613	19.3109	24.3831	37.7709	9.79953	27.2659	39.0543	1.94304	45.8271
ENSMUSG00000002897	Il17ra	6	+	120463247	120487559	interleukin 17 receptor A [Source:MGI Symbol;Acc:MGI:107399]	protein_coding	1.32978	1.13079	2.41963	11.3001	39.3666	12.9452	10.5251	9.90117	7.97298	2.93593	2.65319	8.41216	22.2443	14.6166	14.0186	7.16752	44.6215	2.12746
ENSMUSG00000002900	Lamb1	12	+	31265234	31329644	laminin B1 [Source:MGI Symbol;Acc:MGI:96743]	protein_coding	5.54962	4.98121	3.10429	1.60603	4.25057	1.38574	0.369541	2.08416	0.915001	10.4717	6.47698	4.03746	0.902588	0.201082	0.57695	2.15028	1.50169	3.13169
ENSMUSG00000002908	Kcnn1	8	-	70842049	70863258	potassium intermediate/small conductance calcium-activated channel, subfamily N, member 1 [Source:MGI Symbol;Acc:MGI:1933993]	protein_coding	0.198253	-0.0648455	-0.107582	0.40472	0.133941	0.846845	0.172671	0.660566	0.303812	2.42577	1.96484	3.59516	0.0142635	-0.0102166	-0.00388596	-0.356925	0.313196	0.306307
ENSMUSG00000002910	Arrdc2	8	-	70835129	70839720	arrestin domain containing 2 [Source:MGI Symbol;Acc:MGI:1918057]	protein_coding	0.476465	0.884422	0.331153	1.12966	2.83019	1.81416	0.654631	5.58256	1.20951	2.7818	5.63421	2.64933	0.123463	5.89077	0.829722	0.363639	0.936673	1.01972
ENSMUSG00000002930	Ppp1r17	6	+	56017497	56032689	protein phosphatase 1, regulatory subunit 17 [Source:MGI Symbol;Acc:MGI:1333876]	protein_coding	1.02774	-0.0647421	0.497911	0.246156	0.114381	1.01878	0.172011	0.723381	0.348259	2.61552	1.79043	1.16452	0.0148622	-0.0106976	-0.00398956	0.857493	0.261378	0.415168
ENSMUSG00000002944	Cd36	5	-	17781690	17888801	CD36 molecule [Source:MGI Symbol;Acc:MGI:107899]	protein_coding	14.5887	9.5074	2.39368	1.37627	2.93749	5.38073	0.842481	2.26491	1.23712	24.404	1.84756	2.91829	0.0543117	-0.0435937	-0.00828121	7.45365	0.724734	18.4316
ENSMUSG00000002948	Map2k7	8	+	4238740	4247897	mitogen-activated protein kinase kinase 7 [Source:MGI Symbol;Acc:MGI:1346871]	protein_coding	0.798523	0.0782467	0.978439	0.621269	94.0596	1.72757	2.48986	1.97364	0.794774	3.02782	257.662	3.49044	7.59782	24.2959	40.7551	1.65804	0.593047	-0.0790481
ENSMUSG00000002949	Timm44	8	-	4259731	4275913	translocase of inner mitochondrial membrane 44 [Source:MGI Symbol;Acc:MGI:1343262]	protein_coding	0.35459	1.96351	4.57658	6.00909	135.021	3.56852	1.00932	485.097	11.3461	3.60728	46.6682	5.53071	3.11584	9.61207	2.01235	0.802062	2.88299	0.332135
ENSMUSG00000002957	Ap2a2	7	+	141562173	141633011	adaptor-related protein complex 2, alpha 2 subunit [Source:MGI Symbol;Acc:MGI:101920]	protein_coding	14.7265	0.779555	3.23662	4.9888	8.01287	2.78874	0.355508	12.2102	1.51278	9.9381	3.82873	4.80718	21.678	22.5786	8.21406	1.45007	1.53535	10.8998
ENSMUSG00000002963	Pnkp	7	+	44857139	44862992	polynucleotide kinase 3'- phosphatase [Source:MGI Symbol;Acc:MGI:1891698]	protein_coding	0.860352	0.0329221	5.57562	68.1817	5.06772	3.4494	-0.0993139	251.809	3.90569	164.075	7.41713	5.89374	145.165	24.7993	44.4989	2.00526	1.38591	0.297009
ENSMUSG00000002968	Med25	7	-	44876765	44892712	mediator complex subunit 25 [Source:MGI Symbol;Acc:MGI:1922863]	protein_coding	16.6123	2.84613	6.77826	2.18383	6.84413	2.98196	-0.101029	3.16769	1.65525	5.36277	11.071	8.01246	0.0713975	6.33869	3.32236	5.69423	3.45713	22.7959
ENSMUSG00000002980	Bcam	7	-	19756131	19771016	basal cell adhesion molecule [Source:MGI Symbol;Acc:MGI:1929940]	protein_coding	0.808022	-0.0321812	0.508334	1.19371	0.80361	2.56886	0.127396	1.46301	0.823559	6.48094	2.18952	2.19066	0.242243	0.0702043	0.174303	-0.278223	0.47336	0.217309
ENSMUSG00000002981	Clptm1	7	-	19631571	19665033	cleft lip and palate associated transmembrane protein 1 [Source:MGI Symbol;Acc:MGI:1927155]	protein_coding	6.58323	7.96712	2.17134	7.8923	6.37273	93.1417	1.45785	7.8988	5.61021	16.5021	5.93586	8.86107	1.31059	3.60462	9.3602	0.947694	2.51083	19.8448
ENSMUSG00000002983	Relb	7	-	19606217	19629438	avian reticuloendotheliosis viral (v-rel) oncogene related B [Source:MGI Symbol;Acc:MGI:103289]	protein_coding	1.95533	3.64035	4.12793	2.71046	3.33959	1.63273	14.8455	0.00831895	1.90357	5.49338	6.48457	2.46506	6.73423	-0.068896	5.18194	20.9435	2.84214	0.0348975
ENSMUSG00000002984	Tomm40	7	-	19701313	19715438	translocase of outer mitochondrial membrane 40 [Source:MGI Symbol;Acc:MGI:1858259]	protein_coding	10.5975	5.00122	2.03169	2.23301	21.0511	6.80817	12.2667	4.61895	8.64105	9.21701	12.4719	9.53046	0.75192	9.51143	10.0457	16.1544	4.20125	40.1037
ENSMUSG00000002985	Apoe	7	-	19696109	19699188	apolipoprotein E [Source:MGI Symbol;Acc:MGI:88057]	protein_coding	419.424	137.169	180.816	978.268	66.6492	447.121	11.5663	89.8437	17.0894	420.037	651.312	186.04	135.071	37.7773	60.6304	38.2471	799.117	358.43
ENSMUSG00000002992	Apoc2	7	-	19671579	19677941	apolipoprotein C-II [Source:MGI Symbol;Acc:MGI:88054]	protein_coding	6.72842	0.592815	1.82761	0.667894	0.536508	2.59238	-0.709105	8.43537	6.20438	4.72119	47.1306	3.20325	0.179039	46.0473	-0.0201141	2.83364	1.26341	20.8052
ENSMUSG00000002996	Hbp1	12	-	31926254	31950535	high mobility group box transcription factor 1 [Source:MGI Symbol;Acc:MGI:894659]	protein_coding	7.9611	-0.131499	22.2622	17.8667	13.7045	6.23018	0.558179	3.17403	0.684596	7.98199	10.3768	13.02	0.949926	0.400259	2.56801	6.49445	108.732	0.706164
ENSMUSG00000002997	Prkar2b	12	-	31958476	32061296	protein kinase, cAMP dependent regulatory, type II beta [Source:MGI Symbol;Acc:MGI:97760]	protein_coding	1.99206	1.91951	1.67531	133.226	195.419	1.7657	0.300826	1.21119	0.790283	4.46264	2.68291	243.807	6.10166	10.4444	9.05356	1.52174	1.06062	1.36502
ENSMUSG00000003031	Cdkn1b	6	+	134920401	134925513	cyclin-dependent kinase inhibitor 1B [Source:MGI Symbol;Acc:MGI:104565]	protein_coding	29.5271	10.1221	36.7145	46.5943	28.9015	3.33339	1.21569	17.269	2.49915	4.91048	3.70612	2.75729	6.16849	12.3137	6.44161	42.4248	2.75084	17.6965
ENSMUSG00000003032	Klf4	4	-	55527143	55532466	Kruppel-like factor 4 (gut) [Source:MGI Symbol;Acc:MGI:1342287]	protein_coding	1.11078	2.23396	5.49973	18.1017	2.35505	2.1081	-0.0691687	0.305713	0.939414	86.3308	2.78059	3.00954	63.8279	49.0507	82.0286	3.9061	2.34794	-0.152454
ENSMUSG00000003033	Ap1m1	8	+	72240018	72257385	adaptor-related protein complex AP-1, mu subunit 1 [Source:MGI Symbol;Acc:MGI:102776]	protein_coding	5.36424	6.02595	1.45805	48.4756	9.57548	93.5049	21.2482	4.21792	4.27831	6.48265	8.76226	11.7485	33.9235	28.6558	41.4878	7.34903	3.217	15.8942
ENSMUSG00000003037	Rab8a	8	+	72161200	72183904	RAB8A, member RAS oncogene family [Source:MGI Symbol;Acc:MGI:96960]	protein_coding	5.10727	6.49557	7.80402	22.3616	8.24699	7.69694	6.12061	13.3289	41.2827	4.65453	5.80103	12.801	17.2163	17.0127	21.1805	17.8205	0.953063	57.3184
ENSMUSG00000003038	Hmgn2	4	-	133964738	133968650	high mobility group nucleosomal binding domain 2 [Source:MGI Symbol;Acc:MGI:96136]	protein_coding	27.8413	12.2901	70.0056	350.682	566.949	459.137	319.065	2134.39	854.158	130.736	170.461	64.1987	152.087	138.795	139.91	52.9576	817.399	151.317
ENSMUSG00000003039	Fam32a	8	+	72219730	72224418	family with sequence similarity 32, member A [Source:MGI Symbol;Acc:MGI:1915172]	protein_coding	0.916421	12.8843	5.96944	7.53065	11.4308	6.70987	34.9228	19.5298	32.6564	63.5701	230.529	11.7123	63.2384	55.6492	35.7494	11.4393	11.8901	20.7235
ENSMUSG00000003051	Elf3	1	-	135253575	135258568	E74-like factor 3 [Source:MGI Symbol;Acc:MGI:1101781]	protein_coding	0.272709	2.89682	1.0611	0.797157	1.39094	1.22195	0.104483	0.493859	0.346933	4.23611	2.00229	3.59056	0.0192361	-0.0146362	-0.00429973	-0.314918	1.25459	0.360793
ENSMUSG00000003053	Cyp2c29	19	+	39269405	39330713	cytochrome P450, family 2, subfamily c, polypeptide 29 [Source:MGI Symbol;Acc:MGI:103238]	protein_coding	0.592559	0.0086461	0.55028	0.440155	0.0717381	0.25698	-0.0387527	0.567557	0.584599	1.48605	3.31453	2.75358	0.0686632	-0.0301429	-0.00648806	0.398695	0.441973	1.64402
ENSMUSG00000003062	Stard3nl	13	-	19357676	19395795	STARD3 N-terminal like [Source:MGI Symbol;Acc:MGI:1923455]	protein_coding	1.5886	0.761789	10.2339	1.59596	5.54406	5.2151	-0.263812	0.6237	11.2713	15.4727	795.443	7.57852	37.9418	45.6857	56.4693	8.15824	2.52283	6.31223
ENSMUSG00000003068	Stk11	10	+	80115803	80130682	serine/threonine kinase 11 [Source:MGI Symbol;Acc:MGI:1341870]	protein_coding	1.1217	0.16328	1.40636	0.518175	3.20407	3.95663	3.70759	1.05565	27.4185	2.13235	11.6169	8.56716	41.1722	10.0542	4.28169	6.22563	1.39557	21.9549
ENSMUSG00000003070	Efna2	10	+	80179482	80190010	ephrin A2 [Source:MGI Symbol;Acc:MGI:102707]	protein_coding	0.138991	-0.0103736	-0.112827	0.201729	1.30337	0.667739	0.0210106	-0.152348	0.155452	1.83124	3.17845	2.25056	0.0103858	0.252318	-0.00206695	-0.133212	0.45475	0.0342706
ENSMUSG00000003072	Atp5d	10	+	80138632	80145818	ATP synthase, H+ transporting, mitochondrial F1 complex, delta subunit [Source:MGI Symbol;Acc:MGI:1913293]	protein_coding	8.93203	32.3203	29.9814	121.625	52.2115	497.65	25.9099	15.4787	0.827751	104.032	62.9231	48.4498	264.136	172.922	135.885	39.5242	2277.04	37.035
ENSMUSG00000003099	Ppp5c	7	-	17004640	17027924	protein phosphatase 5, catalytic subunit [Source:MGI Symbol;Acc:MGI:102666]	protein_coding	2.78278	7.31376	3.74147	1.06996	9.02345	2.35935	1.54421	2.17602	2.22268	8.01572	22.1898	8.75923	2.74509	9.01093	5.49288	-0.263442	3.1602	-0.36464
ENSMUSG00000003119	Cdk12	11	+	98203059	98278504	cyclin-dependent kinase 12 [Source:MGI Symbol;Acc:MGI:1098802]	protein_coding	15.107	1.23847	8.54077	0.935389	2.51175	11.0255	11.911	2.14316	15.0885	5.5808	6.92565	7.31682	4.97769	2.06243	4.98988	5.28942	0.474831	0.966441
ENSMUSG00000003123	Lipe	7	-	25379527	25398710	lipase, hormone sensitive [Source:MGI Symbol;Acc:MGI:96790]	protein_coding	5.14293	2.19617	2.5426	1.15612	1.10807	2.24619	3.23045	0.562757	1.03588	4.48236	4.92968	7.67482	0.652833	1.99768	3.29377	-0.161893	0.849463	-0.150346
ENSMUSG00000003131	Pafah1b2	9	-	45962859	46012690	platelet-activating factor acetylhydrolase, isoform 1b, subunit 2 [Source:MGI Symbol;Acc:MGI:108415]	protein_coding	6.24919	3.70091	3.75449	18.0107	4.05454	2.53649	13.8106	1.28134	0.928631	5.47853	5.59689	5.9952	2.80163	3.69743	9.98187	3.49627	2.41421	0.238135
ENSMUSG00000003134	Tbc1d8	1	-	39371492	39478755	TBC1 domain family, member 8 [Source:MGI Symbol;Acc:MGI:1927225]	protein_coding	0.215987	2.51976	1.02172	15.0141	1.40046	2.43395	0.0570837	0.913628	0.526469	16.9191	4.65433	8.92138	0.337479	4.39417	2.73245	0.126656	0.776374	0.208972
ENSMUSG00000003135	Cnot11	1	+	39534992	39546889	CCR4-NOT transcription complex, subunit 11 [Source:MGI Symbol;Acc:MGI:106580]	protein_coding	13.7323	0.0879551	2.57513	0.460678	3.84846	1.92147	19.1678	1.66702	0.830936	2.43924	3.78772	2.6579	2.9949	4.51639	4.9918	1.92546	0.808575	-0.127057
ENSMUSG00000003153	Slc2a3	6	-	122727809	122801640	solute carrier family 2 (facilitated glucose transporter), member 3 [Source:MGI Symbol;Acc:MGI:95757]	protein_coding	2.23747	2.39635	16.1091	40.0536	89.8158	8.79968	2.89783	8.74809	126.007	4.27133	2.81555	5.61048	3.25868	4.03912	4.68093	1.44718	0.264675	0.465385
ENSMUSG00000003154	Foxj2	6	+	122819914	122845366	forkhead box J2 [Source:MGI Symbol;Acc:MGI:1926805]	protein_coding	9.734	4.00601	0.925831	2.06941	1.09398	1.99523	9.0195	1.89925	0.567639	7.67753	3.14701	5.57446	7.30118	6.29169	4.06371	4.23765	0.547357	6.82147
ENSMUSG00000003161	Sri	5	+	8046078	8069379	sorcin [Source:MGI Symbol;Acc:MGI:98419]	protein_coding	66.2169	36.4203	11.0333	212.736	64.5298	139.28	25.7279	46.8244	6.80488	63.7633	16.2974	427.074	31.965	44.3415	79.3932	60.3014	8.09739	64.7825
ENSMUSG00000003166	Dgcr2	16	-	17839482	17898562	DiGeorge syndrome critical region gene 2 [Source:MGI Symbol;Acc:MGI:892866]	protein_coding	1.35311	13.6929	1.58192	0.874469	2.60428	2.5023	-0.125645	3.21987	1.74554	6.59182	5.31054	4.73936	3.51792	5.10169	1.63397	0.0630981	1.24251	4.41406
ENSMUSG00000003184	Irf3	7	+	44997648	45002848	interferon regulatory factor 3 [Source:MGI Symbol;Acc:MGI:1859179]	protein_coding	23.4834	27.6997	6.55679	40.0803	7.63948	21.3084	0.201837	14.1455	0.578688	6.04022	2.45022	20.4099	2.35336	5.73068	40.3615	5.22927	1.4852	44.4715
ENSMUSG00000003190	Bcl2l12	7	-	44991222	44998712	BCL2-like 12 (proline rich) [Source:MGI Symbol;Acc:MGI:1922986]	protein_coding	2.0416	7.58793	2.46535	1.27107	8.71942	2.027	2.35968	2.26493	1.42082	8.55004	4.00769	4.32639	67.8217	22.3936	30.3656	0.104528	1.82614	-0.385783
ENSMUSG00000003198	Zfp959	17	+	55892093	55898928	zinc finger protein 959 [Source:MGI Symbol;Acc:MGI:2385058]	protein_coding	3.66956	2.39942	2.25902	0.769674	2.28974	1.22469	0.270808	0.384016	0.180298	1.51267	3.86278	3.00271	4.7645	-0.00882569	7.53198	-0.170113	0.934	0.386303
ENSMUSG00000003199	Mpnd	17	+	56005711	56016790	MPN domain containing [Source:MGI Symbol;Acc:MGI:1915297]	protein_coding	2.14972	0.274029	3.68981	37.6682	6.80261	4.11469	-0.236768	6.51357	1.82516	37.5367	12.2106	8.96875	30.9588	21.5237	5.85231	0.327724	4.82051	0.627682
ENSMUSG00000003200	Sh3gl1	17	-	56016750	56036635	SH3-domain GRB2-like 1 [Source:MGI Symbol;Acc:MGI:700010]	protein_coding	2.52153	1.99813	14.1261	3.2925	7.85661	14.3338	1.79731	3.36715	87.5751	7.78676	7.49744	8.74914	34.3938	16.2314	8.36653	1.35957	1.85766	0.761817
ENSMUSG00000003206	Ebi3	17	+	55952640	55957022	Epstein-Barr virus induced gene 3 [Source:MGI Symbol;Acc:MGI:1354171]	protein_coding	73.7537	4.85583	4.47688	0.256546	3.05496	5.32453	11.3889	0.0876468	1.47031	2.9362	3.96188	10.8753	0.115238	10.4776	9.44531	1.13512	0.552996	4.57516
ENSMUSG00000003208	Yju2	17	+	55959099	55968285	YJU2 splicing factor [Source:MGI Symbol;Acc:MGI:1920136]	protein_coding	3.94439	0.54339	1.95752	1.12385	2.45484	1.21487	15.3166	1.09742	1.17539	3.04748	6.42286	5.74941	1.02656	1.86372	0.994466	1.90832	1.84465	-0.0341863
ENSMUSG00000003226	Ranbp2	10	+	58446920	58494356	RAN binding protein 2 [Source:MGI Symbol;Acc:MGI:894323]	protein_coding	24.7099	10.3201	2.54383	12.4065	4.19325	2.57521	9.41782	12.0899	3.78099	18.1996	7.24582	8.81907	26.3995	12.6006	15.0629	7.40782	1.1903	33.5651
ENSMUSG00000003227	Edar	10	-	58600789	58675654	ectodysplasin-A receptor [Source:MGI Symbol;Acc:MGI:1343498]	protein_coding	0.0485106	1.59458	0.530773	0.221453	0.210347	0.0261282	0.30705	-0.36177	0.226617	0.935047	1.92994	2.93138	0.00337463	-0.000584015	-0.00278089	0.277897	0.375798	0.414626
ENSMUSG00000003228	Grk5	19	+	60889749	61095968	G protein-coupled receptor kinase 5 [Source:MGI Symbol;Acc:MGI:109161]	protein_coding	2.63504	1.07694	1.8722	42.7579	21.772	10.0241	0.544815	0.776867	0.318191	1.89023	3.86097	4.49415	1.14475	3.89308	2.15784	0.0590679	0.398511	0.497545
ENSMUSG00000003233	Dvl3	16	+	20516982	20534010	dishevelled segment polarity protein 3 [Source:MGI Symbol;Acc:MGI:108100]	protein_coding	3.62086	3.15085	0.672397	1.85084	1.58651	28.6807	17.5136	4.91522	6.27079	1.2768	21.3735	6.21976	22.5503	1.04351	7.1758	6.10005	1.90077	12.1781
ENSMUSG00000003234	Abcf3	16	+	20548577	20561379	ATP-binding cassette, sub-family F (GCN20), member 3 [Source:MGI Symbol;Acc:MGI:1351656]	protein_coding	1.06084	-0.0345514	1.70396	1.64295	4.24819	2.06591	0.0607937	1.76523	1.5367	3.63008	3.31372	5.94208	1.14442	2.74568	0.630096	0.921408	2.15846	0.526295
ENSMUSG00000003235	Eif2b5	16	+	20498817	20509323	eukaryotic translation initiation factor 2B, subunit 5 epsilon [Source:MGI Symbol;Acc:MGI:2446176]	protein_coding	0.887862	0.266322	3.8039	0.365762	4.45068	3.99438	1.55901	9.66175	256.872	2.29024	354.956	8.25132	30.7547	23.7133	9.02692	0.87425	0.642194	13.6477
ENSMUSG00000003269	Cyth2	7	-	45806637	45814581	cytohesin 2 [Source:MGI Symbol;Acc:MGI:1334255]	protein_coding	5.924	0.472723	1.92241	31.7884	62.6838	4.81212	-0.631679	4.59702	1.44101	74.9308	6.52423	5.96734	2.2902	3.34662	5.60379	1.92611	1.57391	12.8333
ENSMUSG00000003271	Sult2b1	7	-	45729983	45784669	sulfotransferase family, cytosolic, 2B, member 1 [Source:MGI Symbol;Acc:MGI:1926342]	protein_coding	2.00721	1.8558	1.3083	0.482139	0.774609	1.05221	0.366627	2.81096	0.72207	5.10075	6.05131	3.85711	0.0130563	-0.00863901	0.0330543	-0.436549	0.447776	0.689508
ENSMUSG00000003273	Car11	7	+	45699843	45704682	carbonic anhydrase 11 [Source:MGI Symbol;Acc:MGI:1336193]	protein_coding	0.117695	-0.0841824	-0.0230603	0.229099	0.520625	0.595241	0.238428	1.48652	0.502457	2.39048	2.13987	2.78954	0.00857503	-0.00522492	-0.00329442	-0.38575	0.22927	0.324364
ENSMUSG00000003279	Dlgap1	17	+	69969073	70821413	DLG associated protein 1 [Source:MGI Symbol;Acc:MGI:1346065]	protein_coding	8.11319	7.16357	7.68859	1.58314	0.781307	1.73335	0.693293	2.1398	0.64259	7.76953	7.29292	6.88992	0.218944	0.0665768	-0.00497392	0.919729	0.823809	1.35088
ENSMUSG00000003282	Plag1	4	-	3900996	3938423	pleiomorphic adenoma gene 1 [Source:MGI Symbol;Acc:MGI:1891916]	protein_coding	11.1815	6.24833	5.31234	0.796533	0.704324	0.65563	0.668677	1.1651	0.235284	5.98182	3.22466	2.45199	0.0937075	0.0139793	0.0436701	0.97036	0.560188	1.44787
ENSMUSG00000003283	Hck	2	+	153108468	153151441	hemopoietic cell kinase [Source:MGI Symbol;Acc:MGI:96052]	protein_coding	0.712661	2.00431	4.65032	89.6827	4.26853	3.41225	0.0444188	2.20656	1.14722	7.37947	6.16133	7.5879	3.0047	11.2418	8.06229	1.8142	1.17308	0.48908
ENSMUSG00000003299	Mrpl4	9	+	21002738	21008839	mitochondrial ribosomal protein L4 [Source:MGI Symbol;Acc:MGI:2137210]	protein_coding	1.74681	11.5742	4.5949	1.44657	14.3931	2.71278	0.52682	2.39606	2.39418	5.44745	6.93289	4.68929	38.3714	41.4562	21.4285	5.71514	4.42045	2.60372
ENSMUSG00000003308	Keap1	9	-	21229730	21239361	kelch-like ECH-associated protein 1 [Source:MGI Symbol;Acc:MGI:1858732]	protein_coding	2.69212	3.25488	3.89666	26.0803	2.47341	8.617	-0.40141	3.08583	0.303118	5.98419	5.46221	9.30806	4.90653	8.08298	8.03434	7.33146	0.400813	5.4024
ENSMUSG00000003309	Ap1m2	9	-	21294275	21312337	adaptor protein complex AP-1, mu 2 subunit [Source:MGI Symbol;Acc:MGI:1336974]	protein_coding	3.94276	-0.069873	1.43976	0.190683	0.727038	0.763716	0.192254	1.12871	0.274884	2.35652	5.43381	2.70766	0.00766625	-0.00479867	0.288449	0.345321	0.476635	0.662011
ENSMUSG00000003316	Glg1	8	-	111154421	111259216	golgi apparatus protein 1 [Source:MGI Symbol;Acc:MGI:104967]	protein_coding	5.20969	4.43671	7.48377	3.94682	4.03498	1.64473	0.183824	0.704974	1.16425	3.63831	3.34152	5.44295	3.58622	1.49197	1.96825	1.94807	2.58976	0.180448
ENSMUSG00000003341	Atp8b3	10	-	80519584	80539124	ATPase, class I, type 8B, member 3 [Source:MGI Symbol;Acc:MGI:1914581]	protein_coding	0.343845	-0.0588901	0.753135	0.684004	0.364604	0.452107	0.14919	0.770847	0.719996	3.12818	3.30365	3.28965	0.0235988	-0.0177496	-0.00540102	-0.39084	0.54712	0.310096
ENSMUSG00000003344	Btbd2	10	-	80642617	80657071	BTB (POZ) domain containing 2 [Source:MGI Symbol;Acc:MGI:1933831]	protein_coding	1.78479	3.01386	1.63602	1.77497	1.82188	1.21814	0.765752	0.485906	0.429677	3.8124	5.03839	8.36768	2.08477	10.4431	9.97882	0.0736999	0.618317	0.0768559
ENSMUSG00000003345	Csnk1g2	10	+	80622838	80640749	casein kinase 1, gamma 2 [Source:MGI Symbol;Acc:MGI:1920014]	protein_coding	3.03568	0.443593	1.07622	50.758	9.84181	7.48782	18.2965	6.07253	2.88437	70.9218	6.23097	14.3989	88.0464	21.8851	43.6828	11.4041	3.09192	5.81322
ENSMUSG00000003346	Abhd17a	10	-	80583654	80590341	abhydrolase domain containing 17A [Source:MGI Symbol;Acc:MGI:106388]	protein_coding	2.51564	1.05813	2.84715	95.7796	18.1076	4.36178	31.5998	8.12042	3.95273	7.31982	9.4743	10.6381	0.10626	13.0639	13.994	10.3806	2.05938	0.397569
ENSMUSG00000003348	Mob3a	10	-	80685253	80701977	MOB kinase activator 3A [Source:MGI Symbol;Acc:MGI:3050117]	protein_coding	4.37725	7.94022	1.57371	39.4844	7.81002	11.413	10.6502	4.04699	4.23484	7.27332	36.0457	26.0108	5.58219	23.9791	35.8724	2.61656	3.79769	14.7284
ENSMUSG00000003352	Cacnb3	15	+	98630840	98644529	calcium channel, voltage-dependent, beta 3 subunit [Source:MGI Symbol;Acc:MGI:103307]	protein_coding	0.470053	1.81243	0.858929	1.06782	0.651011	3.19999	0.189175	0.120641	0.982148	6.11665	13.1778	10.904	0.16616	5.47251	-0.00624837	-0.366934	1.64695	0.475706
ENSMUSG00000003354	Ccdc65	15	+	98708207	98723336	coiled-coil domain containing 65 [Source:MGI Symbol;Acc:MGI:2146001]	protein_coding	0.0604582	-0.0927957	0.0394446	0.358413	0.460398	1.07141	0.270411	-0.246771	0.713168	2.93542	3.99682	4.7936	0.00432335	-0.00158401	-0.00272505	0.181861	0.307937	0.364666
ENSMUSG00000003355	Fkbp11	15	-	98724366	98728198	FK506 binding protein 11 [Source:MGI Symbol;Acc:MGI:1913370]	protein_coding	23.3712	3.71021	12.4825	0.465995	4.5171	0.884514	0.641403	5.44026	2.13097	4.38497	4.96254	6.20853	0.675074	2.8302	0.855055	0.63862	1.00831	1.01603
ENSMUSG00000003360	Ddx23	15	-	98645134	98662894	DEAD (Asp-Glu-Ala-Asp) box polypeptide 23 [Source:MGI Symbol;Acc:MGI:1921601]	protein_coding	0.900169	2.6996	4.5265	2.64178	6.00284	0.697897	0.49462	81.4388	5.54215	7.18547	20.4735	6.12776	3.47126	2.52232	7.42113	0.0553358	1.66865	1.02504
ENSMUSG00000003363	Pld3	7	-	27532000	27553218	phospholipase D family, member 3 [Source:MGI Symbol;Acc:MGI:1333782]	protein_coding	5.18937	25.0181	16.0754	0.103729	13.1889	30.8752	-0.272378	14.6538	806.488	72.7915	7.88501	37.1809	56.8111	25.7894	30.3111	1.37346	1.91764	67.1858
ENSMUSG00000003378	Grik5	7	-	25009849	25072346	glutamate receptor, ionotropic, kainate 5 (gamma 2) [Source:MGI Symbol;Acc:MGI:95818]	protein_coding	0.542023	1.56681	2.22114	0.943232	0.914873	0.400827	0.336525	1.21787	0.827795	3.49388	3.53415	1.90815	0.142452	-0.0261778	-0.00767083	1.41424	1.58994	0.279322
ENSMUSG00000003379	Cd79a	7	+	24897381	24902197	CD79A antigen (immunoglobulin-associated alpha) [Source:MGI Symbol;Acc:MGI:101774]	protein_coding	10.8207	14.4793	0.220952	53.03	55.4894	5.43683	124.771	29.8034	0.951376	10.5446	0.983949	15.4485	-0.0176609	0.0142068	0.00371876	0.322979	0.70525	0.442117
ENSMUSG00000003380	Rabac1	7	-	24969752	24972754	Rab acceptor 1 (prenylated) [Source:MGI Symbol;Acc:MGI:1201692]	protein_coding	15.2433	21.5193	36.2536	1.51228	29.5517	34.8407	1.38413	8.28555	736.448	10.4127	13.8425	18.4381	168.504	113.02	66.296	21.6889	8.15176	80.3545
ENSMUSG00000003382	Etv3	3	+	87525407	87540156	ets variant 3 [Source:MGI Symbol;Acc:MGI:1350926]	protein_coding	5.94546	3.02848	2.74212	0.880716	2.95346	1.64391	31.4947	1.64833	1.20799	3.61956	4.96259	2.62694	3.33342	1.87946	0.377028	3.37278	1.55614	0.0616709
ENSMUSG00000003402	Prkcsh	9	+	22002806	22014222	protein kinase C substrate 80K-H [Source:MGI Symbol;Acc:MGI:107877]	protein_coding	1.10815	13.6703	9.28807	1.356	7.0632	4.1758	23.4435	4.00967	272.352	5.35162	9.55889	12.8761	38.0683	7.86716	10.9944	0.236675	3.09604	-0.243374
ENSMUSG00000003410	Elavl3	9	-	22015005	22052023	ELAV like RNA binding protein 3 [Source:MGI Symbol;Acc:MGI:109157]	protein_coding	6.84827	1.10069	0.00601697	0.773131	0.127363	1.59453	-0.0582594	1.11596	1.03479	2.61546	3.72518	3.63101	0.700168	0.0382794	0.0812854	1.2333	0.46096	51.6941
ENSMUSG00000003411	Rab3b	4	+	108879063	108943324	RAB3B, member RAS oncogene family [Source:MGI Symbol;Acc:MGI:1917158]	protein_coding	4.39798	1.25832	1.75697	0.477284	0.726945	0.446126	0.286253	0.293052	0.193665	1.91263	2.50955	4.20813	-0.00216875	0.00381415	-0.00163446	-0.362863	0.136856	0.530951
ENSMUSG00000003418	St8sia6	2	-	13651021	13794064	ST8 alpha-N-acetyl-neuraminide alpha-2,8-sialyltransferase 6 [Source:MGI Symbol;Acc:MGI:2386797]	protein_coding	1.77929	0.380678	1.11141	0.439739	1.00128	0.663904	0.116669	1.32577	0.425931	3.96633	1.91179	2.14743	8.46746	0.182748	-0.00413352	0.838126	0.25982	1.96374
ENSMUSG00000003420	Fcgrt	7	-	45092990	45103851	Fc receptor, IgG, alpha chain transporter [Source:MGI Symbol;Acc:MGI:103017]	protein_coding	20.0857	8.12203	24.9548	99.5625	4.90397	8.45944	0.0792414	7.59614	1.77776	103.955	3.51575	18.3806	28.6105	6.43755	4.58664	1.37068	1.44585	0.984997
ENSMUSG00000003421	Nosip	7	+	45062429	45078210	nitric oxide synthase interacting protein [Source:MGI Symbol;Acc:MGI:1913644]	protein_coding	0.505222	6.02478	7.51094	28.2891	511.495	12.0107	-0.135764	21.9132	403.705	8.04309	10.6572	27.128	59.6598	44.4693	41.0064	0.925172	1.60684	18.509
ENSMUSG00000003423	Pih1d1	7	+	45154303	45160065	PIH1 domain containing 1 [Source:MGI Symbol;Acc:MGI:1916095]	protein_coding	4.98601	0.773891	1.13569	145.502	4.06245	7.60235	13.2394	7.47157	2.02658	98.8846	12.549	16.5158	58.1103	76.738	34.2838	6.64236	2.02616	12.5812
ENSMUSG00000003429	Rps11	7	-	45122379	45124439	ribosomal protein S11 [Source:MGI Symbol;Acc:MGI:1351329]	protein_coding	157.222	101.292	244.347	850.107	866.038	567.592	348.86	3336.41	1342.45	563.555	1022.45	309.633	1736.4	1806.27	1513.74	217.331	2002.89	288.037
ENSMUSG00000003435	Supt5	7	-	28314891	28338746	suppressor of Ty 5, DSIF elongation factor subunit [Source:MGI Symbol;Acc:MGI:1202400]	protein_coding	10.2945	0.463228	0.331341	24.0507	11.8774	15.5667	9.80066	4.67391	2.36982	72.675	5.30616	12.2427	72.8713	37.6432	30.6265	11.7633	3.34466	17.8862
ENSMUSG00000003436	Dll3	7	-	28293553	28302238	delta like canonical Notch ligand 3 [Source:MGI Symbol;Acc:MGI:1096877]	protein_coding	0.111911	-0.0757266	-0.0269623	0.529313	0.3442	2.10769	0.210752	-0.326468	0.425361	1.82791	2.08889	3.94288	0.00819272	-0.00509892	-0.00304274	-0.356677	0.208665	0.286072
ENSMUSG00000003437	Paf1	7	+	28392951	28399388	Paf1, RNA polymerase II complex component [Source:MGI Symbol;Acc:MGI:1923988]	protein_coding	1.42528	6.76748	9.62704	91.4278	8.72696	4.46199	-0.280238	4.95316	1.74543	98.8476	10.3017	7.78457	20.7755	14.9145	30.2584	0.810348	2.54504	-0.185916
ENSMUSG00000003438	Timm50	7	-	28305516	28312072	translocase of inner mitochondrial membrane 50 [Source:MGI Symbol;Acc:MGI:1913775]	protein_coding	3.82132	1.68355	2.78642	2.02187	22.3204	88.3226	68.1707	5.05011	6.19589	38.9101	11.9035	6.09274	17.0408	32.3901	30.9832	7.19752	11.3988	-0.013282
ENSMUSG00000003444	Med29	7	-	28386146	28392708	mediator complex subunit 29 [Source:MGI Symbol;Acc:MGI:1914474]	protein_coding	1.71655	0.456341	0.921637	97.0112	2.91819	225.933	40.552	5.7445	0.733227	1.26119	7.08589	10.219	5.69529	16.3641	36.91	1.74334	1.53311	-0.543161
ENSMUSG00000003452	Bicd1	6	+	149408886	149563329	BICD cargo adaptor 1 [Source:MGI Symbol;Acc:MGI:1101760]	protein_coding	14.5899	11.3369	3.49663	1.51837	1.82366	2.06937	128.518	2.12856	2.10071	8.45359	7.45325	6.34025	0.0413368	0.101434	0.0502221	7.8587	1.96635	0.285145
ENSMUSG00000003458	Ncstn	1	-	172066013	172082795	nicastrin [Source:MGI Symbol;Acc:MGI:1891700]	protein_coding	3.71663	10.4376	1.43678	15.9296	3.33326	5.46374	5.69001	10.692	2.93108	8.2613	8.36194	13.7123	10.2535	19.771	12.7289	8.5604	1.24243	19.3989
ENSMUSG00000003464	Pex19	1	+	172126755	172136493	peroxisomal biogenesis factor 19 [Source:MGI Symbol;Acc:MGI:1334458]	protein_coding	1.44455	6.06567	4.01342	4.57165	6.12013	2.26462	4.24064	1.20667	1.8412	11.4286	7.61545	4.45198	3.42666	3.51681	15.3271	4.68388	2.64607	-0.00395437
ENSMUSG00000003469	Phyhip	14	+	70457476	70468832	phytanoyl-CoA hydroxylase interacting protein [Source:MGI Symbol;Acc:MGI:1860417]	protein_coding	0.292606	-0.0527987	0.367682	0.626868	0.238862	1.13002	0.132658	0.859827	0.488064	2.53691	1.67913	2.54174	0.627366	0.138116	0.14128	-0.354385	0.364409	0.442497
ENSMUSG00000003476	Crhr2	6	-	55090049	55133016	corticotropin releasing hormone receptor 2 [Source:MGI Symbol;Acc:MGI:894312]	protein_coding	6.01562	2.37088	4.4549	0.783783	0.27532	1.6739	0.457977	0.762609	0.422921	5.68148	4.26291	3.23938	-2.93847e-05	0.00307712	-0.00303839	-0.00763904	0.670134	0.624524
ENSMUSG00000003477	Inmt	6	-	55170626	55175043	indolethylamine N-methyltransferase [Source:MGI Symbol;Acc:MGI:102963]	protein_coding	-0.0174032	-0.102818	0.134342	0.831397	0.12828	1.5121	0.309805	0.571627	0.738443	3.24411	2.36697	4.78927	-0.00180288	0.00366113	-0.00184823	-0.386468	0.714691	0.413546
ENSMUSG00000003484	Cyp4f18	8	-	71988482	72009626	cytochrome P450, family 4, subfamily f, polypeptide 18 [Source:MGI Symbol;Acc:MGI:1919304]	protein_coding	1.90665	16.8464	10.7139	1.13558	2.79849	3.77294	100.182	11.1563	105.894	13.413	20.6367	7.74642	21.8071	17.7517	3.34655	6.10264	2.92472	-0.30629
ENSMUSG00000003500	Impdh1	6	-	29200434	29216364	inosine monophosphate dehydrogenase 1 [Source:MGI Symbol;Acc:MGI:96567]	protein_coding	2.40149	0.171373	1.68168	0.118975	2.03606	3.78374	15.1574	1.64328	3.11107	8.06445	4.09745	6.24328	9.34339	-0.0295039	8.55134	5.65743	0.410178	-0.0127161
ENSMUSG00000003505	Psg18	7	-	18345422	18355009	pregnancy specific glycoprotein 18 [Source:MGI Symbol;Acc:MGI:1347251]	protein_coding	0.299077	7.92491	1.08388	0.608818	0.806266	0.93871	0.143145	0.518683	0.60061	2.85047	4.18826	6.42001	0.0208489	3.45615	-0.0048662	-0.367904	0.313493	0.204451
ENSMUSG00000003518	Dusp3	11	-	101971143	101987013	dual specificity phosphatase 3 (vaccinia virus phosphatase VH1-related) [Source:MGI Symbol;Acc:MGI:1919599]	protein_coding	3.30207	2.72904	1.88984	4.46317	105.452	2.03408	-0.364788	1.70876	0.554094	1.25935	4.96495	4.67888	6.83085	1.78372	2.95698	4.73134	14.7148	18.5039
ENSMUSG00000003526	Prodh	16	-	18060357	18090203	proline dehydrogenase [Source:MGI Symbol;Acc:MGI:97770]	protein_coding	1.54625	0.304704	1.33041	1.21042	1.83276	2.6168	0.298019	1.52781	0.952153	5.37913	6.18513	5.0526	0.302493	30.2221	0.430626	0.478134	1.0486	0.583558
ENSMUSG00000003527	Ess2	16	-	17900709	17911348	ess-2 splicing factor [Source:MGI Symbol;Acc:MGI:107854]	protein_coding	3.18992	5.83555	1.10457	1.1477	3.10085	4.8585	-0.398263	3.14759	2.60679	18.6134	3.36191	2.61943	6.70878	7.30761	4.47886	8.18396	1.83822	46.9316
ENSMUSG00000003528	Slc25a1	16	-	17925223	17928219	solute carrier family 25 (mitochondrial carrier, citrate transporter), member 1 [Source:MGI Symbol;Acc:MGI:1345283]	protein_coding	6.92718	0.433625	2.38328	0.961134	7.08336	3.11203	27.5171	1.48407	1.91558	2.56122	5.29679	13.0077	26.615	33.0601	18.5555	0.779133	3.77367	-0.640107
ENSMUSG00000003531	Dgcr6	16	+	18052860	18071632	DiGeorge syndrome critical region gene 6 [Source:MGI Symbol;Acc:MGI:1202877]	protein_coding	11.4778	12.2611	9.67183	1.24661	6.04454	2.77086	0.176717	1.29725	1.35764	35.591	6.73372	5.68963	13.7987	8.82909	35.7874	1.27692	1.58759	0.564421
ENSMUSG00000003534	Ddr1	17	-	35681567	35704621	discoidin domain receptor family, member 1 [Source:MGI Symbol;Acc:MGI:99216]	protein_coding	0.581429	0.612933	1.16318	0.707482	1.26616	1.16987	0.334735	0.345676	0.894697	3.49876	5.90649	5.25616	0.195534	0.0417497	0.592164	0.29617	0.797642	0.286346
ENSMUSG00000003541	Ier3	17	+	35821684	35822923	immediate early response 3 [Source:MGI Symbol;Acc:MGI:104814]	protein_coding	1.91824	3.72372	101.712	15.7474	468.921	16.242	2.15716	1.01372	55.6182	1.97014	23.432	21.9928	15.1409	3.37219	10.4464	14.7546	23.2932	-0.00358961
ENSMUSG00000003545	Fosb	7	-	19302696	19310051	FBJ osteosarcoma oncogene B [Source:MGI Symbol;Acc:MGI:95575]	protein_coding	2.1867	2.5281	2.82074	0.834508	3.41183	5.46879	2.55577	-0.112013	1.11825	24.6963	3.40455	6.11627	0.0569085	-0.0223308	-0.00818349	2.23224	2.60371	-0.104879
ENSMUSG00000003546	Klc4	17	-	46630624	46646022	kinesin light chain 4 [Source:MGI Symbol;Acc:MGI:1922014]	protein_coding	1.06799	2.78225	2.31635	0.70087	1.52213	0.97464	-0.0288689	0.418465	1.01826	2.4421	4.65191	3.06766	4.51035	27.9109	3.09376	0.42808	0.524778	0.162506
ENSMUSG00000003549	Ercc1	7	+	19344778	19356524	excision repair cross-complementing rodent repair deficiency, complementation group 1 [Source:MGI Symbol;Acc:MGI:95412]	protein_coding	4.74934	0.194358	0.403441	0.636674	4.23633	9.37594	-0.131783	12.538	0.729839	7.71729	4.23874	13.8102	45.7484	2.5738	13.2181	15.3122	1.4596	54.8147
ENSMUSG00000003555	Cyp17a1	19	-	46667165	46673172	cytochrome P450, family 17, subfamily a, polypeptide 1 [Source:MGI Symbol;Acc:MGI:88586]	protein_coding	1.05374	0.0221627	2.78018	0.870745	0.82856	0.670875	-0.0700186	1.0687	0.946619	2.72861	3.22376	4.55939	0.365529	0.0370491	-0.00624603	-0.212062	0.358996	0.0159295
ENSMUSG00000003559	As3mt	19	+	46707458	46741099	arsenic (+3 oxidation state) methyltransferase [Source:MGI Symbol;Acc:MGI:1929882]	protein_coding	10.7718	5.4526	2.59098	0.788618	1.99203	2.25957	24.0006	1.07359	0.567508	5.59633	3.95572	6.1273	5.83576	3.78273	26.2925	4.05427	1.91462	0.533418
ENSMUSG00000003573	Homer3	8	+	70282827	70294361	homer scaffolding protein 3 [Source:MGI Symbol;Acc:MGI:1347359]	protein_coding	0.735153	0.066298	1.8646	1.60369	1.58351	0.680307	-0.165382	0.278904	0.718943	2.01868	5.73561	2.51174	0.156086	-0.0368003	-0.00664052	-0.0994433	0.360354	-0.0843759
ENSMUSG00000003575	Crtc1	8	-	70382355	70439579	CREB regulated transcription coactivator 1 [Source:MGI Symbol;Acc:MGI:2142523]	protein_coding	1.7155	1.63443	1.02937	0.727319	2.15857	1.45817	0.235185	2.21315	0.750762	2.82135	3.88832	3.78398	0.828401	0.16449	0.190657	-0.27086	0.739006	1.58626
ENSMUSG00000003581	Rnf215	11	+	4135202	4141172	ring finger protein 215 [Source:MGI Symbol;Acc:MGI:1918923]	protein_coding	2.34015	0.22745	0.762923	0.828285	0.333614	1.24051	19.738	0.222907	2.14702	25.805	5.00836	3.77018	3.26226	1.04726	5.9711	4.86711	1.6718	0.382845
ENSMUSG00000003585	Sec14l2	11	-	4097039	4123415	SEC14-like lipid binding 2 [Source:MGI Symbol;Acc:MGI:1915065]	protein_coding	0.149386	-0.0806961	0.696347	0.242738	0.693471	0.415293	0.22547	0.455418	1.32401	2.82839	2.60563	3.40397	0.0108391	-0.00712788	-0.00362079	0.173345	0.333342	0.308527
ENSMUSG00000003604	Aven	2	+	112492964	112634573	apoptosis, caspase activation inhibitor [Source:MGI Symbol;Acc:MGI:1921518]	protein_coding	12.1607	3.43226	1.30314	1.03079	4.41148	4.99441	0.0189966	0.62321	0.986258	4.94206	6.57692	4.43844	4.66297	0.630606	2.99988	1.35825	0.876933	19.4805
ENSMUSG00000003617	Cp	3	+	19957054	20009145	ceruloplasmin [Source:MGI Symbol;Acc:MGI:88476]	protein_coding	12.8175	11.1181	7.90678	0.947837	0.778805	1.87501	1.76982	0.468447	1.51736	5.13012	7.23557	6.97669	-0.0213211	0.022358	-0.000559857	0.79011	0.383224	1.21597
ENSMUSG00000003623	Crot	5	-	8966033	8997324	carnitine O-octanoyltransferase [Source:MGI Symbol;Acc:MGI:1921364]	protein_coding	5.85434	6.12401	2.40745	29.3129	13.5598	3.64632	17.8084	4.07037	1.73418	3.87873	4.24416	6.02728	13.8375	15.9093	12.3903	5.03911	2.27898	3.40584
ENSMUSG00000003644	Rps6ka1	4	-	133847290	133887797	ribosomal protein S6 kinase polypeptide 1 [Source:MGI Symbol;Acc:MGI:104558]	protein_coding	6.96736	0.240024	1.72166	36.4485	8.40346	4.77086	19.0025	204.156	79.6212	9.92461	3.91968	7.74835	16.9117	13.0441	20.6876	3.78268	1.43877	32.3676
ENSMUSG00000003657	Calb2	8	-	110137502	110168210	calbindin 2 [Source:MGI Symbol;Acc:MGI:101914]	protein_coding	0.19394	-0.0155474	0.349548	0.364552	0.393167	1.36376	0.0324754	-0.205912	0.219696	2.70148	3.18285	1.74974	0.0141667	-0.011158	-0.00284252	-0.182491	0.162902	0.0518754
ENSMUSG00000003660	Snrnp200	2	+	127208386	127240451	small nuclear ribonucleoprotein 200 (U5) [Source:MGI Symbol;Acc:MGI:2444401]	protein_coding	8.38515	4.11172	3.17632	1.77415	2.83713	2.57227	0.0135235	1.38174	1.94505	17.5733	11.8972	6.04184	22.8012	12.0092	16.2175	4.07744	1.11837	7.15023
ENSMUSG00000003662	Ciao1	2	-	127240938	127247816	cytosolic iron-sulfur protein assembly 1 [Source:MGI Symbol;Acc:MGI:1346998]	protein_coding	13.7317	4.86799	2.15703	22.5956	2.05686	1.12485	21.42	1.00405	0.337283	1.31143	1.63209	6.04866	2.33525	6.19698	2.54321	2.44023	0.287723	1.40235
ENSMUSG00000003665	Has1	17	-	17843323	17855205	hyaluronan synthase 1 [Source:MGI Symbol;Acc:MGI:106590]	protein_coding	3.24452	1.95057	17.0482	1.2998	0.110967	0.418195	0.217057	-0.19708	2.81595	2.42333	7.89497	1.95201	0.155204	-0.0773465	-0.0154318	7.48757	14.9057	-0.00703647
ENSMUSG00000003680	Taf6l	19	-	8774487	8786417	TATA-box binding protein associated factor 6 like [Source:MGI Symbol;Acc:MGI:2444957]	protein_coding	0.72992	0.0519894	1.46865	1.09919	1.9295	1.91297	0.0190497	1.84243	1.53409	7.02024	5.72936	3.40344	0.893483	2.99547	6.81176	0.347746	1.62356	0.149258
ENSMUSG00000003721	Insig2	1	-	121304353	121332589	insulin induced gene 2 [Source:MGI Symbol;Acc:MGI:1920249]	protein_coding	1.35252	3.95928	2.71938	1.65516	2.91816	1.43412	9.8642	0.764885	1.13035	1.63372	4.42875	5.99754	4.24578	12.1517	0.573093	0.180985	1.56702	-0.418573
ENSMUSG00000003731	Kpna6	4	-	129643980	129672767	karyopherin (importin) alpha 6 [Source:MGI Symbol;Acc:MGI:1100836]	protein_coding	0.760821	0.0269954	1.58805	0.557047	1.13416	1.63787	-0.050893	1.87309	1.00062	11.3138	3.0652	2.47003	2.6606	1.5295	2.03662	-0.0180549	0.762297	0.0582855
ENSMUSG00000003746	Man1a	10	-	53904785	54076609	mannosidase 1, alpha [Source:MGI Symbol;Acc:MGI:104677]	protein_coding	17.3362	5.00358	6.70765	12.6096	1.27659	1.41858	-0.0237361	1.10339	0.489403	71.4413	7.33364	9.80853	11.7375	8.76938	13.7729	5.26458	1.15652	14.6016
ENSMUSG00000003752	Itpkc	7	-	27207172	27228661	inositol 1,4,5-trisphosphate 3-kinase C [Source:MGI Symbol;Acc:MGI:2442554]	protein_coding	0.069826	2.21322	2.58787	1.87542	1.29957	0.597019	0.538933	2.63114	0.275637	2.39726	3.24779	6.05132	0.0432243	-0.00144247	0.0790638	0.0501268	1.55347	0.53595
ENSMUSG00000003762	Coq8b	7	+	27233023	27257950	coenzyme Q8B [Source:MGI Symbol;Acc:MGI:1924139]	protein_coding	3.70301	0.930561	3.12604	1.7005	1.73288	5.00412	0.368017	1.22929	0.861475	66.7961	6.48198	4.8565	0.0627777	4.32814	0.252319	1.69021	1.36295	0.646568
ENSMUSG00000003778	Brd8	18	-	34598615	34624601	bromodomain containing 8 [Source:MGI Symbol;Acc:MGI:1925906]	protein_coding	25.8489	5.88611	2.72106	1.21243	7.16831	5.19938	6.93054	2.58506	1.29868	4.67188	6.64955	6.73359	18.9935	26.6439	28.8923	6.49078	2.30884	6.61748
ENSMUSG00000003779	Kif20a	18	+	34624613	34633277	kinesin family member 20A [Source:MGI Symbol;Acc:MGI:1201682]	protein_coding	4.66911	2.7266	4.90035	0.169891	4.70452	3.94492	0.0871426	3.85181	18.2152	2.9767	2.73853	4.42568	29.7266	4.43535	23.259	2.31724	33.0697	28.3049
ENSMUSG00000003808	Farsa	8	+	84856989	84869257	phenylalanyl-tRNA synthetase, alpha subunit [Source:MGI Symbol;Acc:MGI:1913840]	protein_coding	4.42043	4.59732	4.91075	29.9573	6.76059	16.512	3.39982	3.18963	-0.0991476	4.06431	2.95649	14.6368	7.46344	28.2499	10.6897	9.57469	38.5292	2.39427
ENSMUSG00000003809	Gcdh	8	-	84886393	84893921	glutaryl-Coenzyme A dehydrogenase [Source:MGI Symbol;Acc:MGI:104541]	protein_coding	0.592709	-0.0612916	1.64903	16.316	2.36778	0.899564	0.148854	2.70409	1.31775	3.33686	4.07349	3.57429	7.97284	5.63195	27.6803	1.23327	0.534012	0.381495
ENSMUSG00000003810	Mast2	4	-	116306762	116464183	microtubule associated serine/threonine kinase 2 [Source:MGI Symbol;Acc:MGI:894676]	protein_coding	0.74761	2.50064	2.65632	4.2867	1.56207	1.75562	1.65051	0.25196	1.08645	4.42853	4.807	4.38019	2.0448	0.126635	1.90306	2.16798	1.47762	0.23677
ENSMUSG00000003812	Dnase2a	8	+	84908560	84922915	deoxyribonuclease II alpha [Source:MGI Symbol;Acc:MGI:1329019]	protein_coding	13.3113	7.18592	7.52095	1.0407	7.86448	1.48147	1.10833	2.6551	0.409262	5.85751	5.43846	3.74418	5.18992	14.5615	31.337	3.03352	1.64925	1.63799
ENSMUSG00000003813	Rad23a	8	-	84834019	84840665	RAD23 homolog A, nucleotide excision repair protein [Source:MGI Symbol;Acc:MGI:105126]	protein_coding	14.4548	0.353399	4.07032	0.535839	13.2894	5.83149	3.34673	17.1481	6.47661	4.78888	14.9713	10.51	2.67204	15.1962	4.88888	9.04484	56.419	26.223
ENSMUSG00000003814	Calr	8	-	84841850	84846934	calreticulin [Source:MGI Symbol;Acc:MGI:88252]	protein_coding	43.6174	12.3294	35.9872	75.0014	52.7644	23.4843	35.8363	45.9853	65.6224	66.3815	18.1966	23.8278	174.718	155.515	133.859	20.6454	6.08858	48.1234
ENSMUSG00000003824	Syce2	8	+	84872111	84888221	synaptonemal complex central element protein 2 [Source:MGI Symbol;Acc:MGI:1919096]	protein_coding	2.47077	0.254113	2.0629	1.31148	19.1509	1.74226	40.7725	7.05527	2.52469	293.318	6.37082	5.21311	65.0869	41.9966	25.9187	12.1021	7.54788	-0.391703
ENSMUSG00000003847	Nfat5	8	+	107293470	107379517	nuclear factor of activated T cells 5 [Source:MGI Symbol;Acc:MGI:1859333]	protein_coding	7.23567	12.0659	1.6162	4.81208	1.4214	1.8274	26.5349	2.75458	0.836508	5.37226	4.85958	4.80083	2.41592	4.82675	5.53591	7.92459	1.3752	3.68769
ENSMUSG00000003848	Nob1	8	-	107412486	107425051	NIN1/RPN12 binding protein 1 homolog [Source:MGI Symbol;Acc:MGI:1914869]	protein_coding	33.7863	4.61746	3.86633	5.68667	6.79909	3.35734	0.454748	4.98765	1.75751	29.7124	3.93285	14.97	8.41357	4.10466	11.0303	5.10294	3.14236	71.3181
ENSMUSG00000003849	Nqo1	8	-	107388225	107403206	NAD(P)H dehydrogenase, quinone 1 [Source:MGI Symbol;Acc:MGI:103187]	protein_coding	3.18809	-0.00029687	3.51302	0.217235	1.12943	1.13982	0.203029	-0.269849	0.606187	0.939325	2.38976	2.91048	0.0972981	-0.0208229	-0.00461649	0.509329	0.550539	0.23131
ENSMUSG00000003863	Ppfia3	7	-	45339122	45367019	protein tyrosine phosphatase, receptor type, f polypeptide (PTPRF), interacting protein (liprin), alpha 3 [Source:MGI Symbol;Acc:MGI:1924037]	protein_coding	0.509441	2.99041	0.936206	0.592985	0.543076	1.21488	0.561391	0.447022	0.848202	5.45339	3.61179	3.90323	0.0038217	-0.000469318	-0.0033394	0.460251	0.257157	0.576177
ENSMUSG00000003865	Gys1	7	+	45434844	45456619	glycogen synthase 1, muscle [Source:MGI Symbol;Acc:MGI:101805]	protein_coding	4.23322	1.64951	6.81641	3.42367	0.482079	0.81372	0.26062	2.00408	0.852774	5.381	5.41522	3.19108	2.79434	12.1488	2.19836	1.49117	2.25436	0.291497
ENSMUSG00000003868	Ruvbl2	7	-	45421760	45438096	RuvB-like protein 2 [Source:MGI Symbol;Acc:MGI:1342299]	protein_coding	1.97895	4.20686	2.42396	1.81461	13.8243	70.6868	-0.447414	2.10262	3.50066	56.0984	5.95856	3.28797	9.81045	6.30155	12.5387	0.258967	1.59077	1.0628
ENSMUSG00000003872	Lin7b	7	-	45367891	45370583	lin-7 homolog B (C. elegans) [Source:MGI Symbol;Acc:MGI:1330858]	protein_coding	0.105005	-0.0412141	-0.0561259	0.713914	0.0671044	1.25535	0.105754	-0.223699	0.164961	1.57556	2.66635	4.77281	0.00783037	-0.00553667	-0.00224529	-0.234468	0.141766	0.448147
ENSMUSG00000003873	Bax	7	-	45461697	45466898	BCL2-associated X protein [Source:MGI Symbol;Acc:MGI:99702]	protein_coding	70.9882	39.8932	10.4016	1.64811	16.887	18.9313	15.2552	27.9447	6.22926	12.0199	727.157	24.8541	47.2379	33.1495	17.5721	69.9149	2.41513	82.6678
ENSMUSG00000003882	Il7r	15	-	9505788	9530176	interleukin 7 receptor [Source:MGI Symbol;Acc:MGI:96562]	protein_coding	11.8142	7.31875	14.3929	3.98249	5.82732	2.95487	0.971902	2.58428	1.09124	67.9069	6.66548	10.2415	0.135083	1.35138	2.40415	2.30836	0.312946	2.55356
ENSMUSG00000003923	Tfam	10	-	71225464	71238280	transcription factor A, mitochondrial [Source:MGI Symbol;Acc:MGI:107810]	protein_coding	7.30847	4.76039	6.04657	67.6982	3.039	6.32956	-0.424595	5.71241	-0.0188657	1.72475	5.76953	10.3629	0.131247	2.59031	5.15455	5.98568	0.0438189	14.4477
ENSMUSG00000003929	Zfp81	17	-	33329342	33358878	zinc finger protein 81 [Source:MGI Symbol;Acc:MGI:1890752]	protein_coding	5.38602	4.63855	2.18909	0.534972	0.703258	0.711698	0.643376	0.552608	0.216006	3.36163	1.99937	1.19729	2.70916	0.341346	0.678595	1.20391	0.169496	1.04704
ENSMUSG00000003934	Efnb3	11	-	69554092	69560205	ephrin B3 [Source:MGI Symbol;Acc:MGI:109196]	protein_coding	5.36825	-0.110005	2.1431	0.276752	0.161601	0.386988	0.330103	1.11776	0.350589	1.00438	2.0763	3.03998	0.109086	-0.00381673	-0.00368167	-0.125338	0.474212	0.624361
ENSMUSG00000003948	Mmd	11	+	90249456	90278589	monocyte to macrophage differentiation-associated [Source:MGI Symbol;Acc:MGI:1914718]	protein_coding	1.82465	8.5172	4.55846	70.9154	350.991	1.77166	4.81057	2.00693	1.23245	2.43021	5.66052	4.10647	15.7376	16.9603	35.6704	6.12096	1.09716	0.118218
ENSMUSG00000003949	Hlf	11	-	90336536	90390895	hepatic leukemia factor [Source:MGI Symbol;Acc:MGI:96108]	protein_coding	0.678632	2.48201	0.914542	0.512358	32.4415	0.78678	0.0221963	0.413183	0.28233	2.66323	5.29975	4.66695	0.0513739	-0.0121117	-0.00296059	-0.176016	0.390104	0.33152
ENSMUSG00000003955	Fam162a	16	-	36043761	36071594	family with sequence similarity 162, member A [Source:MGI Symbol;Acc:MGI:1917436]	protein_coding	17.2726	0.587376	4.96425	265.769	21.9266	326.445	48.4503	4.25618	5.78254	4.63736	16.6497	11.8486	84.0865	101.178	98.4295	57.1477	9.38544	101.511
ENSMUSG00000003970	Rpl8	15	+	76904078	76906314	ribosomal protein L8 [Source:MGI Symbol;Acc:MGI:1350927]	protein_coding	118.849	20.7339	78.6823	358.383	917.38	885.792	215.62	110.745	246.68	706.456	905.967	535.908	1807.22	1589.98	1141.44	224.677	42.1662	154.712
ENSMUSG00000003974	Grm3	5	-	9485541	9725170	glutamate receptor, metabotropic 3 [Source:MGI Symbol;Acc:MGI:1351340]	protein_coding	2.08925	2.75504	1.31887	0.575761	0.901828	0.663964	0.647801	-0.0188595	0.0728795	1.47654	1.75579	1.25083	-0.0168321	0.0176984	-0.000568102	0.966212	0.308222	1.01553
ENSMUSG00000003992	Ssbp2	13	+	91460283	91703429	single-stranded DNA binding protein 2 [Source:MGI Symbol;Acc:MGI:1914220]	protein_coding	0.903594	24.4395	3.52203	42.3196	183.622	3.12026	-0.111033	6.02959	1.08939	7.27542	7.2435	10.4397	10.0479	6.59878	13.4497	6.3779	0.511887	0.426155
ENSMUSG00000004018	Fancl	11	+	26386135	26471876	Fanconi anemia, complementation group L [Source:MGI Symbol;Acc:MGI:1914280]	protein_coding	6.51496	3.18806	6.78899	3.00021	4.0419	1.95392	0.517967	-0.132308	0.431682	2.13036	1.83494	4.53164	20.053	10.9939	26.2423	2.02419	0.273018	0.397801
ENSMUSG00000004031	Brinp2	1	-	158245269	158356326	bone morphogenic protein/retinoic acid inducible neural-specific 2 [Source:MGI Symbol;Acc:MGI:2443333]	protein_coding	4.05498	2.81069	1.90184	1.37199	0.457229	1.79816	0.837686	1.14704	0.129995	4.62813	4.73585	3.66511	0.0449993	0.0170745	-0.00220928	0.139322	0.363713	1.16673
ENSMUSG00000004032	Gstm5	3	+	107895821	107898686	glutathione S-transferase, mu 5 [Source:MGI Symbol;Acc:MGI:1309466]	protein_coding	1.20665	0.0335973	1.92322	0.922029	14.7519	1.92552	-0.106745	0.197001	1.81615	2.78411	5.18342	2.5912	1.5231	49.9185	-0.0106574	2.15863	1.58775	0.195732
ENSMUSG00000004035	Gstm7	3	-	107926334	107931817	glutathione S-transferase, mu 7 [Source:MGI Symbol;Acc:MGI:1915562]	protein_coding	0.274038	-0.0867462	-0.140539	0.336968	0.61802	0.824538	0.240715	1.41626	0.428223	2.38143	4.11708	3.7136	0.0191423	-0.0136351	-0.00521877	-0.448798	0.357097	0.336836
ENSMUSG00000004038	Gstm3	3	-	107963696	107969283	glutathione S-transferase, mu 3 [Source:MGI Symbol;Acc:MGI:106026]	protein_coding	0.0975237	-0.133962	0.0520813	0.638269	0.196942	1.41581	0.521588	0.570162	0.424156	3.49571	1.04503	3.4943	0.00690202	-0.00275324	-0.00411279	0.869507	0.314082	0.870108
ENSMUSG00000004040	Stat3	11	-	100885098	100939540	signal transducer and activator of transcription 3 [Source:MGI Symbol;Acc:MGI:103038]	protein_coding	10.2907	3.40546	11.5753	47.6579	8.87349	61.6397	8.30235	2.30603	7.85289	12.4048	33.3492	15.4617	13.0033	13.3573	12.2212	6.48713	5.33666	7.33904
ENSMUSG00000004043	Stat5a	11	+	100859351	100885169	signal transducer and activator of transcription 5A [Source:MGI Symbol;Acc:MGI:103036]	protein_coding	9.02119	1.72648	2.23068	0.91803	91.3123	3.10008	0.0446502	1.65247	1.27226	4.08672	9.88508	5.331	32.1391	6.43722	6.27771	2.6047	1.24987	15.047
ENSMUSG00000004044	Cavin1	11	-	100956733	100970887	caveolae associated 1 [Source:MGI Symbol;Acc:MGI:1277968]	protein_coding	0.963963	2.29432	3.58024	11.7727	95.8868	7.57525	0.224601	0.865498	1.21345	2.7971	4.60561	5.0162	7.15039	1.5101	3.6577	1.19863	2.84182	0.117438
ENSMUSG00000004054	Map3k11	19	+	5688742	5702865	mitogen-activated protein kinase kinase kinase 11 [Source:MGI Symbol;Acc:MGI:1346880]	protein_coding	1.70512	1.10993	1.10697	1.2325	2.37481	2.3881	-0.304882	0.669896	1.44606	4.63143	3.7738	7.06173	20.1243	6.40837	9.40258	1.91205	2.03113	13.9178
ENSMUSG00000004056	Akt2	7	+	27591552	27640826	thymoma viral proto-oncogene 2 [Source:MGI Symbol;Acc:MGI:104874]	protein_coding	0.888442	0.0561049	2.99175	41.1675	3.98724	5.83204	-0.148073	2.11656	1.26667	32.3524	6.9765	10.4508	0.553791	3.78933	5.04312	0.792326	1.31606	0.543214
ENSMUSG00000004069	Dnaja3	16	+	4639989	4707695	DnaJ heat shock protein family (Hsp40) member A3 [Source:MGI Symbol;Acc:MGI:1933786]	protein_coding	0.746699	2.81757	1.90569	1.22692	49.1975	3.83881	-0.00695302	0.509933	1.0058	5.07201	5.08835	3.93105	12.6717	8.06934	11.0988	1.32287	0.968442	0.32398
ENSMUSG00000004070	Hmox2	16	+	4726361	4766742	heme oxygenase 2 [Source:MGI Symbol;Acc:MGI:109373]	protein_coding	2.38179	4.05389	8.36944	2.22494	6.50718	84.102	0.429049	0.722362	3.24093	23.6424	7.62133	4.0223	0.536036	25.3984	25.3997	1.70932	4.07934	0.100627
ENSMUSG00000004071	Cdip1	16	-	4750348	4790292	cell death inducing Trp53 target 1 [Source:MGI Symbol;Acc:MGI:1913876]	protein_coding	4.33897	7.61386	10.2778	0.697301	4.66326	3.34951	0.682304	3.3568	80.3349	7.74448	6.50614	9.22952	10.4149	3.09659	6.25042	3.44655	1.23281	10.0873
ENSMUSG00000004085	Map3k20	2	+	72285637	72442610	mitogen-activated protein kinase kinase kinase 20 [Source:MGI Symbol;Acc:MGI:2443258]	protein_coding	1.96691	4.38942	5.68768	1.31343	2.37703	1.59526	0.728929	0.54598	10.1419	3.60104	3.83542	5.47897	10.8374	15.4264	22.4094	1.95712	0.626379	1.16411
ENSMUSG00000004096	Cwc15	9	+	14500617	14510577	CWC15 spliceosome-associated protein [Source:MGI Symbol;Acc:MGI:1913320]	protein_coding	53.6509	26.127	11.4104	146.511	18.0375	331.893	31.5103	11.2723	4.73685	186.105	9.49301	16.6693	203.698	180.549	142.831	42.2561	8.17839	15.9307
ENSMUSG00000004098	Col5a3	9	-	20770050	20815067	collagen, type V, alpha 3 [Source:MGI Symbol;Acc:MGI:1858212]	protein_coding	0.556296	1.06956	1.06015	0.529726	0.0644878	0.593285	-0.0438855	0.105221	0.543312	2.05526	1.70225	2.34367	0.0359196	-0.0287386	0.0367533	-0.237153	0.356294	0.00610131
ENSMUSG00000004099	Dnmt1	9	-	20907209	20959888	DNA methyltransferase (cytosine-5) 1 [Source:MGI Symbol;Acc:MGI:94912]	protein_coding	17.3269	20.4856	6.60319	17.7375	8.69893	5.19667	24.2064	4.63638	27.9897	2.9306	3.54935	5.92007	46.4781	42.2689	41.3325	5.48472	0.598483	12.7282
ENSMUSG00000004100	Ppan	9	+	20888175	20892178	peter pan homolog [Source:MGI Symbol;Acc:MGI:2178445]	protein_coding	1.74859	0.631297	0.919776	0.966847	16.0891	2.07001	0.0530689	2.49501	1.91962	91.99	2.37736	4.82064	8.08756	3.1046	26.3771	1.79049	1.63388	0.0293967
ENSMUSG00000004105	Angptl2	2	+	33216069	33247717	angiopoietin-like 2 [Source:MGI Symbol;Acc:MGI:1347002]	protein_coding	1.40498	0.022478	4.98335	1.87852	2.70933	0.849167	0.0789466	1.18077	2.0483	4.00678	4.28668	4.80558	0.134811	0.751109	6.7608	1.52423	4.58271	0.118179
ENSMUSG00000004110	Cacna1e	1	-	154390731	154884501	calcium channel, voltage-dependent, R type, alpha 1E subunit [Source:MGI Symbol;Acc:MGI:106217]	protein_coding	5.05734	2.87587	5.59013	1.85386	0.851367	1.89051	0.692823	1.49872	0.761568	10.1922	6.14014	5.95575	0.0848973	-0.00156314	0.00124938	1.86782	1.95862	1.30619
ENSMUSG00000004113	Cacna1b	2	-	24603887	24763152	calcium channel, voltage-dependent, N type, alpha 1B subunit [Source:MGI Symbol;Acc:MGI:88296]	protein_coding	3.66922	1.17307	2.42016	1.60586	0.271135	0.705273	0.396717	0.116906	0.0848259	2.36331	4.03818	3.93483	-0.0106343	0.0114911	0.225203	0.641255	0.234411	0.641227
ENSMUSG00000004127	Trmt10a	3	+	138143448	138159821	tRNA methyltransferase 10A [Source:MGI Symbol;Acc:MGI:1920421]	protein_coding	4.37842	3.95699	4.77052	0.749604	1.78114	1.03372	6.34777	1.37495	0.754833	4.13647	5.94593	5.3069	0.0215048	1.15737	-0.00670093	3.0878	0.499105	1.11984
ENSMUSG00000004151	Etv1	12	+	38779380	38870484	ets variant 1 [Source:MGI Symbol;Acc:MGI:99254]	protein_coding	13.1593	4.79398	3.9679	1.01933	0.550759	0.587988	0.336849	1.72006	0.498978	4.35353	4.66855	4.91878	0.0810157	1.19719	0.435942	3.2908	0.620136	10.619
ENSMUSG00000004187	Kifc2	15	+	76659858	76668196	kinesin family member C2 [Source:MGI Symbol;Acc:MGI:109187]	protein_coding	0.383296	1.74192	0.56068	0.675322	0.441752	1.01335	0.342944	0.522429	0.713602	3.09012	4.28722	2.63038	0.0258088	-0.0187007	0.016675	0.701021	0.635858	0.379885
ENSMUSG00000004207	Psap	10	+	60277627	60302597	prosaposin [Source:MGI Symbol;Acc:MGI:97783]	protein_coding	51.0962	33.3274	21.4603	19.846	34.6119	44.9137	33.1725	23.2036	104.036	108.542	50.2595	54.0272	88.1165	88.0385	86.0471	20.6822	9.15304	59.8901
ENSMUSG00000004221	Ikbkg	X	+	74393290	74453854	inhibitor of kappaB kinase gamma [Source:MGI Symbol;Acc:MGI:1338074]	protein_coding	20.6587	3.36127	2.23445	0.462512	1.06203	1.0198	4.85604	0.648751	0.314483	2.19704	3.42166	8.30336	2.98807	4.25738	6.90736	1.23807	0.274001	3.86653
ENSMUSG00000004231	Pax2	19	+	44756045	44837871	paired box 2 [Source:MGI Symbol;Acc:MGI:97486]	protein_coding	0.618567	0.310877	1.02103	0.796114	0.142897	0.396603	0.241038	0.047429	0.745556	3.06062	4.65694	4.31744	0.136586	0.00640996	0.00629054	0.00900625	0.410536	0.41663
ENSMUSG00000004233	Wars2	3	+	99141068	99239186	tryptophanyl tRNA synthetase 2 (mitochondrial) [Source:MGI Symbol;Acc:MGI:1917810]	protein_coding	0.619452	1.33398	0.877175	0.632198	0.873791	0.855221	0.0858275	-0.0914955	0.678392	2.24836	4.47749	12.2505	0.238469	1.01341	0.0939795	0.806577	0.432674	1.66624
ENSMUSG00000004263	Atn1	6	-	124742544	124756524	atrophin 1 [Source:MGI Symbol;Acc:MGI:104725]	protein_coding	-0.0183508	0.847157	1.51874	6.27409	0.306082	2.12714	0.646535	1.29502	0.511221	3.18825	3.33503	3.02723	0.644313	3.39538	0.824113	10.4481	3.92008	1.23987
ENSMUSG00000004264	Phb2	6	+	124712336	124716950	prohibitin 2 [Source:MGI Symbol;Acc:MGI:102520]	protein_coding	26.454	8.35448	19.9073	115.891	82.6354	31.7581	9.68639	25.6755	468.772	26.1956	14.7135	25.6744	81.4363	37.5962	84.66	4.91335	2.0113	48.2208
ENSMUSG00000004266	Ptpn6	6	-	124720707	124738714	protein tyrosine phosphatase, non-receptor type 6 [Source:MGI Symbol;Acc:MGI:96055]	protein_coding	2.18347	13.9233	3.24676	103.139	24.8083	61.8677	22.5933	10.3626	4.68493	59.0906	7.39332	27.6399	188.783	132.355	131.693	20.2747	2.51411	7.95636
ENSMUSG00000004267	Eno2	6	-	124760053	124769673	enolase 2, gamma neuronal [Source:MGI Symbol;Acc:MGI:95394]	protein_coding	0.612097	6.88414	0.703659	1.68317	1.10349	3.106	0.390516	2.78453	0.924067	7.15164	5.714	5.63986	0.256116	0.0214123	0.103963	-0.546339	0.621254	0.532246
ENSMUSG00000004268	Emg1	6	-	124704085	124712178	EMG1 N1-specific pseudouridine methyltransferase [Source:MGI Symbol;Acc:MGI:1315195]	protein_coding	60.829	49.4781	15.7995	1.31663	37.7907	44.0281	95.5021	25.7282	630.424	86.5392	14.6169	39.97	147.033	145.112	132.73	63.3339	3.02835	59.8066
ENSMUSG00000004270	Lpcat3	6	+	124663027	124704418	lysophosphatidylcholine acyltransferase 3 [Source:MGI Symbol;Acc:MGI:1315211]	protein_coding	0.183418	4.03258	8.37893	0.779109	9.53137	5.80395	0.884049	5.25906	626.918	7.62536	9.42423	5.21775	0.0131942	4.26636	12.5163	24.5064	1.2729	23.0016
ENSMUSG00000004285	Atp6v1f	6	+	29467718	29470512	ATPase, H+ transporting, lysosomal V1 subunit F [Source:MGI Symbol;Acc:MGI:1913394]	protein_coding	101.446	28.1993	15.9029	253.634	25.86	801.219	51.6617	1597.68	5.57351	115.627	27.845	28.6958	56.0843	251.406	136.317	50.3009	925.252	74.2579
ENSMUSG00000004296	Il12b	11	+	44400063	44414033	interleukin 12b [Source:MGI Symbol;Acc:MGI:96540]	protein_coding	0.794483	0.0894381	2.43243	0.611674	0.00173801	0.960039	-0.0757597	-0.222146	0.626741	1.57857	2.31782	1.64972	0.0480347	-0.0393908	-0.00670651	-0.0295821	0.351776	-0.177187
ENSMUSG00000004317	Clcn5	X	-	7153810	7319358	chloride channel, voltage-sensitive 5 [Source:MGI Symbol;Acc:MGI:99486]	protein_coding	3.75465	1.34815	3.67507	0.434271	0.651157	0.224556	0.533025	-0.232954	0.290678	1.34179	3.04306	2.49114	3.35496	2.95451	0.613913	1.71647	0.45243	0.921134
ENSMUSG00000004319	Clcn3	8	-	60910389	60983300	chloride channel, voltage-sensitive 3 [Source:MGI Symbol;Acc:MGI:103555]	protein_coding	15.8046	12.775	6.4068	48.166	4.1842	7.78873	11.7669	1.85817	0.45128	56.044	4.7504	7.01424	10.927	8.36102	15.8925	8.54245	1.04693	0.543657
ENSMUSG00000004328	Hif3a	7	-	17031507	17062427	hypoxia inducible factor 3, alpha subunit [Source:MGI Symbol;Acc:MGI:1859778]	protein_coding	0.785427	4.35372	1.31151	0.437834	0.124704	0.760892	0.226086	0.47327	0.517088	1.61573	1.85996	2.76607	0.391609	0.0162678	0.0145848	-0.382045	0.521306	0.438521
ENSMUSG00000004341	Gpx6	13	+	21312125	21319624	glutathione peroxidase 6 [Source:MGI Symbol;Acc:MGI:1922762]	protein_coding	0.406481	-0.0438282	1.68348	0.87483	2.11994	0.0564083	0.102836	0.317298	0.817741	2.39898	1.7504	2.13037	0.0273826	-0.0210285	-0.00574507	2.30356	0.365306	0.15501
ENSMUSG00000004344	Gpx5	13	-	21286429	21292731	glutathione peroxidase 5 [Source:MGI Symbol;Acc:MGI:104886]	protein_coding	-0.00821146	3.85005	0.140074	0.321017	0.412648	0.667063	0.434237	0.370862	0.153042	1.88723	2.08264	1.3683	-0.0011155	0.00338339	-0.002259	0.213723	0.37949	0.479822
ENSMUSG00000004347	Pde1c	6	-	56069804	56652487	phosphodiesterase 1C [Source:MGI Symbol;Acc:MGI:108413]	protein_coding	13.2101	6.84231	8.87133	2.75263	1.8204	2.16673	0.860645	2.43718	0.664613	10.4706	5.11315	8.42877	0.0140327	0.0391484	0.0317992	3.03114	2.27888	1.65075
ENSMUSG00000004356	Utp20	10	-	88746607	88826804	UTP20 small subunit processome component [Source:MGI Symbol;Acc:MGI:1917933]	protein_coding	2.69344	1.69398	1.84929	1.01994	1.16718	0.369995	0.505957	1.0715	0.439411	2.86369	7.58187	5.35971	6.89468	2.06604	0.839584	1.52998	0.546033	1.60544
ENSMUSG00000004359	Spic	10	-	88674772	88685015	Spi-C transcription factor (Spi-1/PU.1 related) [Source:MGI Symbol;Acc:MGI:1341168]	protein_coding	0.674924	15.606	0.39551	9.92532	15.0968	25.0188	0.00076353	4.16385	1.32524	22.6798	2.59259	21.4529	0.0419553	2.09826	-0.00738733	0.465719	0.525751	12.6923
ENSMUSG00000004360	9330159F19Rik	10	+	29211606	29230779	RIKEN cDNA 9330159F19 gene [Source:MGI Symbol;Acc:MGI:3036239]	protein_coding	3.0417	2.15486	1.69197	0.49245	0.513544	-0.00275583	0.656681	0.420165	0.1034	1.81992	2.08994	2.2422	-0.014417	0.0531402	-0.00140858	0.700061	0.542159	0.92478
ENSMUSG00000004364	Cul3	1	-	80264923	80340480	cullin 3 [Source:MGI Symbol;Acc:MGI:1347360]	protein_coding	59.197	13.0765	4.46484	81.018	128.128	64.3368	21.7966	2.83091	1.83501	3.12227	6.98791	6.82661	14.83	37.2356	39.7344	9.45373	2.79697	27.2678
ENSMUSG00000004366	Sst	16	-	23889573	23890958	somatostatin [Source:MGI Symbol;Acc:MGI:98326]	protein_coding	0.0863425	-0.137936	2.99867	4.51358	5.42057	1.51031	2.80908	1.39886	0.552339	1.90978	4.76283	4.64108	0.00606341	-0.00197968	-0.00405521	11.5102	11.8655	1.26646
ENSMUSG00000004371	Il11	7	-	4772373	4782859	interleukin 11 [Source:MGI Symbol;Acc:MGI:107613]	protein_coding	1.92232	4.05145	3.68061	0.542863	0.246156	0.228208	0.142233	0.183429	0.395561	2.10714	2.69743	1.74283	0.0206687	-0.0154975	-0.00482745	1.17545	0.3107	0.275549
ENSMUSG00000004383	Large1	8	-	72814599	73353540	LARGE xylosyl- and glucuronyltransferase 1 [Source:MGI Symbol;Acc:MGI:1342270]	protein_coding	9.18287	2.82863	2.71492	0.94567	0.612287	0.909026	0.304885	0.552348	0.468897	3.26903	2.62835	3.08942	0.940827	0.334671	0.207578	1.69485	0.437127	6.49867
ENSMUSG00000004393	Ddx56	11	-	6258919	6267772	DEAD (Asp-Glu-Ala-Asp) box polypeptide 56 [Source:MGI Symbol;Acc:MGI:1277172]	protein_coding	1.62509	0.0886304	7.28643	1.44723	9.69382	2.68364	-0.159386	1.56138	1.92147	18.0698	6.93861	5.04994	17.6444	9.92375	9.42361	2.03087	4.73463	-0.234922
ENSMUSG00000004394	Tmed4	11	-	6270369	6274870	transmembrane p24 trafficking protein 4 [Source:MGI Symbol;Acc:MGI:1915070]	protein_coding	21.6499	7.30571	3.65259	0.0943802	5.01928	7.43351	22.3323	8.01877	0.645298	3.15478	3.97006	10.8953	46.4145	16.3853	5.92201	12.8579	1.75466	3.2891
ENSMUSG00000004415	Col26a1	5	-	136741759	136883209	collagen, type XXVI, alpha 1 [Source:MGI Symbol;Acc:MGI:2155345]	protein_coding	5.52641	4.43671	4.47972	8.98669	1.07205	2.14652	1.02298	1.2047	0.459121	5.39431	4.52314	8.35375	0.0686996	0.0184133	1.56439	1.5947	0.78376	1.75566
ENSMUSG00000004446	Bid	6	-	120891930	120916853	BH3 interacting domain death agonist [Source:MGI Symbol;Acc:MGI:108093]	protein_coding	1.93444	0.350006	1.08148	35.7845	4.83637	4.27275	71.3006	5.63801	1.38432	3.86027	4.26831	11.0683	63.8426	66.8417	93.8812	0.826984	2.84321	-0.614794
ENSMUSG00000004451	Ralb	1	-	119470305	119504794	v-ral simian leukemia viral oncogene B [Source:MGI Symbol;Acc:MGI:1927244]	protein_coding	2.2707	7.28569	6.02863	2.25955	2.22004	1.82272	4.62556	1.50783	2.21035	100.794	7.09821	5.40709	20.9045	16.4194	9.26046	6.47947	2.56468	-0.126091
ENSMUSG00000004455	Ppp1cc	5	+	122158278	122175273	protein phosphatase 1 catalytic subunit gamma [Source:MGI Symbol;Acc:MGI:104872]	protein_coding	2.81696	4.25216	9.90325	2.43668	27.2704	6.27477	-0.0642168	3.08369	3.4181	11.31	10.74	7.64877	14.8893	12.4702	20.8439	1.60981	9.15018	0.368483
ENSMUSG00000004460	Dnajb11	16	+	22857845	22879634	DnaJ heat shock protein family (Hsp40) member B11 [Source:MGI Symbol;Acc:MGI:1915088]	protein_coding	42.7529	22.4413	15.3692	11.4561	12.0714	20.6334	51.9204	31.6173	0.336932	19.8483	8.62618	25.0567	25.2049	29.1825	34.1273	32.0824	216.057	21.9714
ENSMUSG00000004462	Tbccd1	16	-	22813214	22857669	TBCC domain containing 1 [Source:MGI Symbol;Acc:MGI:1917823]	protein_coding	3.61849	8.76843	3.98034	1.02399	2.96313	1.53547	0.209128	2.15547	0.807887	30.8824	8.02918	6.67306	0.513213	0.561124	0.0911851	0.1356	2.00378	0.766424
ENSMUSG00000004473	Clec11a	7	-	44302687	44306902	C-type lectin domain family 11, member a [Source:MGI Symbol;Acc:MGI:1298219]	protein_coding	0.272659	1.24917	0.645599	0.247371	0.392459	0.763492	0.0747914	0.399765	0.448648	1.86589	2.65893	1.69658	0.0500069	-0.0148838	-0.00408729	-0.279231	0.248317	0.169783
ENSMUSG00000004500	Zfp324	7	+	12965838	12974236	zinc finger protein 324 [Source:MGI Symbol;Acc:MGI:2444641]	protein_coding	3.28677	1.57376	1.0762	0.550774	0.815211	1.70053	0.259502	1.69925	0.416593	3.91865	1.65075	2.74068	0.134889	2.11779	0.0198242	-0.379617	0.194286	0.621563
ENSMUSG00000004508	Gab2	7	+	97081586	97308946	growth factor receptor bound protein 2-associated protein 2 [Source:MGI Symbol;Acc:MGI:1333854]	protein_coding	1.89168	2.13107	1.73105	0.518418	1.27629	0.617244	0.336776	0.395785	0.413674	2.5843	2.00041	1.79698	0.246926	0.563668	0.571934	0.791736	0.27396	0.573799
ENSMUSG00000004530	Coro1c	5	-	113842436	113908758	coronin, actin binding protein 1C [Source:MGI Symbol;Acc:MGI:1345964]	protein_coding	3.61615	5.26865	4.3235	58.5923	16.2413	10.1745	10.0314	5.13418	1.02297	31.5075	9.18645	17.2914	7.83953	3.83277	11.2284	13.3308	3.20111	11.8889
ENSMUSG00000004535	Tax1bp1	6	+	52713729	52766780	Tax1 (human T cell leukemia virus type I) binding protein 1 [Source:MGI Symbol;Acc:MGI:1289308]	protein_coding	45.5918	14.0768	11.3802	19.6202	24.0984	100.125	12.5221	11.6651	10.6767	52.904	19.2624	92.1045	66.7509	41.251	38.8341	9.06842	9.61837	81.7484
ENSMUSG00000004540	Psg17	7	-	18813937	18821607	pregnancy specific glycoprotein 17 [Source:MGI Symbol;Acc:MGI:1347250]	protein_coding	0.0283696	2.78637	0.0896599	0.44538	0.143994	0.159036	0.324931	0.420577	0.18294	1.88983	1.60939	1.45871	0.00180556	0.000803065	-0.00260328	0.245173	0.320036	0.438069
ENSMUSG00000004542	Psg19	7	-	18789567	18798520	pregnancy specific glycoprotein 19 [Source:MGI Symbol;Acc:MGI:1347252]	protein_coding	0.656285	3.70003	0.712653	1.0157	0.488424	0.720256	0.521741	1.35676	0.158139	4.72406	1.8349	1.95893	-0.00531584	0.0138296	-0.00241094	1.27107	0.218826	1.58447
ENSMUSG00000004552	Ctse	1	+	131638306	131675505	cathepsin E [Source:MGI Symbol;Acc:MGI:107361]	protein_coding	12.8127	8.89878	0.801955	232.464	29.5252	97.0749	36.0339	117.427	1.23893	3.64354	3.53546	16.0777	40.9479	45.581	25.6431	0.800174	0.782229	11.803
ENSMUSG00000004558	Ndrg2	14	-	51905271	51914158	N-myc downstream regulated gene 2 [Source:MGI Symbol;Acc:MGI:1352498]	protein_coding	4.4142	-0.121053	2.12599	0.838911	1.27154	3.00183	0.363763	3.72473	0.557716	5.69374	2.39743	4.67992	0.219451	-0.0134908	-0.00611752	-0.0188117	0.992043	0.510598
ENSMUSG00000004561	Mettl17	14	+	51884842	51893039	methyltransferase like 17 [Source:MGI Symbol;Acc:MGI:1098577]	protein_coding	4.23431	1.88287	2.47612	25.077	3.45911	1.90956	0.357125	1.27644	0.266763	5.78471	3.65234	5.14133	0.00615639	-0.0025362	4.62904	1.05113	0.268618	0.487516
ENSMUSG00000004562	Arhgef40	14	+	51984719	52006251	Rho guanine nucleotide exchange factor (GEF) 40 [Source:MGI Symbol;Acc:MGI:2685515]	protein_coding	3.48251	5.4372	2.37215	0.768684	3.14289	1.92137	0.469079	0.764804	0.32133	6.63366	10.6229	7.75058	0.479807	0.0981507	0.573296	0.201053	1.50512	0.577178
ENSMUSG00000004565	Pnpla6	8	+	3515384	3544267	patatin-like phospholipase domain containing 6 [Source:MGI Symbol;Acc:MGI:1354723]	protein_coding	5.16845	0.539746	1.56057	0.915437	0.765516	2.96766	0.184607	1.27081	0.392119	3.65926	2.5726	2.8605	0.253469	2.79845	0.0322872	0.363746	0.45108	2.63425
ENSMUSG00000004567	Mcoln1	8	+	3500457	3515232	mucolipin 1 [Source:MGI Symbol;Acc:MGI:1890498]	protein_coding	5.98775	2.22381	10.5279	83.8567	5.30004	3.94678	0.206521	1.50962	0.591639	13.1116	5.25412	10.1009	4.65199	10.0218	4.70312	3.52311	1.45539	0.883416
ENSMUSG00000004568	Arhgef18	8	+	3353415	3456601	rho/rac guanine nucleotide exchange factor (GEF) 18 [Source:MGI Symbol;Acc:MGI:2142567]	protein_coding	3.31431	15.1296	14.5217	1.84666	1.82243	11.3879	1.42336	7.13376	112.263	4.82159	2.92889	17.2517	5.04347	5.89621	9.61374	6.15123	350.23	56.5071
ENSMUSG00000004591	Pkn2	3	-	142790902	142882004	protein kinase N2 [Source:MGI Symbol;Acc:MGI:109211]	protein_coding	13.4057	14.3604	6.11826	1.80816	5.30641	28.3946	0.150458	1.18016	2.00519	42.5657	7.53481	4.2005	9.21391	5.68842	4.58445	4.38831	1.79876	11.0656
ENSMUSG00000004609	Cd33	7	-	43524216	43544428	CD33 antigen [Source:MGI Symbol;Acc:MGI:99440]	protein_coding	13.356	3.9207	5.05734	12.9701	3.8864	2.19868	11.5412	2.29984	0.446711	2.22107	6.37992	1.85828	7.55205	3.45071	6.66918	0.772817	0.488331	0.0473457
ENSMUSG00000004610	Etfb	7	+	43444083	43457800	electron transferring flavoprotein, beta polypeptide [Source:MGI Symbol;Acc:MGI:106098]	protein_coding	20.6519	1263.97	26.7539	257.896	31.7574	188.372	48.2306	51.5231	1003.35	174.953	269.819	45.49	457.102	378.045	318.029	11.4409	2.93916	81.0173
ENSMUSG00000004612	Nkg7	7	+	43437073	43438249	natural killer cell group 7 sequence [Source:MGI Symbol;Acc:MGI:1931250]	protein_coding	159.719	24.7218	86.7331	806.398	100.116	2104.52	479.473	4670.44	3074.87	230.011	396.99	112.338	565.475	574.364	662.271	115.122	14.0228	668.152
ENSMUSG00000004626	Stxbp2	8	+	3630955	3643644	syntaxin binding protein 2 [Source:MGI Symbol;Acc:MGI:107370]	protein_coding	19.4294	32.1865	34.1797	110.801	6.5431	89.6252	48.7815	28.194	25.1242	39.6759	4.51442	38.7065	37.1331	95.8114	37.1567	111.015	220.989	11.7156
ENSMUSG00000004630	Pcp2	8	-	3623371	3625545	Purkinje cell protein 2 (L7) [Source:MGI Symbol;Acc:MGI:97508]	protein_coding	0.233886	-0.0537381	0.690415	0.239826	0.103722	0.0544058	0.137513	1.98126	0.323734	1.46842	3.29457	1.24058	0.0166797	-0.0123796	-0.00407686	-0.335206	0.260311	0.193535
ENSMUSG00000004631	Sgce	6	-	4674350	4747207	sarcoglycan, epsilon [Source:MGI Symbol;Acc:MGI:1329042]	protein_coding	12.5077	7.97819	13.0561	52.7724	4.90205	2.42824	1.17493	0.457111	0.0243805	5.77547	4.98736	5.95246	0.252179	0.093529	0.0138962	5.21069	0.752188	1.65528
ENSMUSG00000004633	Chn2	6	+	54039554	54301810	chimerin 2 [Source:MGI Symbol;Acc:MGI:1917243]	protein_coding	8.92525	2.86626	0.666675	2.65245	3.07224	6.5627	22.5895	1.69408	1.82829	25.5973	10.9846	19.9853	0.592294	1.99869	0.929377	6.27444	1.53569	14.6219
ENSMUSG00000004637	Wwox	8	+	114439655	115352708	WW domain-containing oxidoreductase [Source:MGI Symbol;Acc:MGI:1931237]	protein_coding	0.526022	4.35231	2.69104	17.8731	2.43268	3.03182	0.167845	1.88436	0.778917	26.6388	5.81384	8.4141	7.76777	0.257025	1.40759	1.11218	1.32942	0.367114
ENSMUSG00000004642	Slbp	5	-	33634952	33652574	stem-loop binding protein [Source:MGI Symbol;Acc:MGI:108402]	protein_coding	24.7647	6.92642	20.8963	1.54657	44.0113	31.7866	6.10958	9.081	548.991	112.209	11.4404	103.007	51.6443	69.0969	47.7514	16.3409	2.17399	56.1413
ENSMUSG00000004651	Tyr	7	-	87424771	87493512	tyrosinase [Source:MGI Symbol;Acc:MGI:98880]	protein_coding	2.57593	2.014	1.70859	0.346178	0.17263	1.05419	0.562487	0.625753	0.126665	2.25125	1.08358	1.19043	-0.0160705	0.0168084	-0.000467532	1.22204	0.189959	0.712618
ENSMUSG00000004654	Ghrhr	6	+	55376295	55388530	growth hormone releasing hormone receptor [Source:MGI Symbol;Acc:MGI:95710]	protein_coding	0.374892	1.97116	0.386594	0.962694	0.299441	0.786654	0.248589	0.786029	0.549796	5.97028	4.19678	4.84372	0.0253341	-0.0184482	-0.00637758	-0.0163551	0.44187	0.788818
ENSMUSG00000004655	Aqp1	6	+	55336432	55348555	aquaporin 1 [Source:MGI Symbol;Acc:MGI:103201]	protein_coding	3.03842	1.9531	2.04019	1.87786	7.47101	1.73558	0.095881	2.34627	0.47247	4.04287	3.49306	4.54342	0.0218909	-0.0167878	3.49635	-0.322741	1.47309	0.618329
ENSMUSG00000004661	Arid3b	9	-	57790353	57836793	AT rich interactive domain 3B (BRIGHT-like) [Source:MGI Symbol;Acc:MGI:1930768]	protein_coding	0.265776	1.91022	3.15983	0.566426	1.43992	1.30933	0.147405	2.08915	0.494653	3.58609	4.48816	4.53578	1.31868	2.71356	4.57723	1.35722	0.718869	0.381176
ENSMUSG00000004665	Cnn2	10	+	79988584	79996062	calponin 2 [Source:MGI Symbol;Acc:MGI:105093]	protein_coding	10.1509	4.31015	11.8529	32.419	64.2471	259.583	132.904	18.002	286.202	30.1337	217.535	51.0807	49.6136	56.9186	83.6288	36.6498	500.257	64.1073
ENSMUSG00000004667	Polr2e	10	-	80035949	80039795	polymerase (RNA) II (DNA directed) polypeptide E [Source:MGI Symbol;Acc:MGI:1913670]	protein_coding	4.0136	0.189444	4.3375	1.01568	20.1294	55.954	69.2267	0.761971	2.43237	8.58929	6.70662	8.43848	116.747	62.1607	26.9588	5.03728	8.31654	-0.422373
ENSMUSG00000004668	Abca13	11	+	9191942	9684259	ATP-binding cassette, sub-family A (ABC1), member 13 [Source:MGI Symbol;Acc:MGI:2388707]	protein_coding	3.57358	2.20179	3.37275	0.742295	0.519158	1.0968	0.950144	0.286988	0.70716	4.76138	3.94084	3.58473	0.631939	0.0383472	0.0323174	1.37037	0.547049	0.752154
ENSMUSG00000004677	Myo9b	8	+	71272714	71360713	myosin IXb [Source:MGI Symbol;Acc:MGI:106624]	protein_coding	3.58885	0.0805963	0.702239	6.36418	25.1979	31.6335	20.1597	0.922251	0.896583	2.86571	2.42822	3.4965	25.594	9.85976	14.174	1.16329	0.985723	-0.148372
ENSMUSG00000004698	Hdac9	12	-	34047580	34917095	histone deacetylase 9 [Source:MGI Symbol;Acc:MGI:1931221]	protein_coding	8.37138	6.20211	5.22747	1.49098	2.03449	1.81839	0.74912	0.348155	0.309816	5.20249	6.54396	4.97351	6.77854	3.37142	5.6118	1.95021	0.548833	1.25686
ENSMUSG00000004707	Ly9	1	-	171588624	171607410	lymphocyte antigen 9 [Source:MGI Symbol;Acc:MGI:96885]	protein_coding	0.233275	0.0461762	4.56827	0.528461	3.13593	3.62316	2.76634	4.72769	86.5825	3.27642	1.8639	7.47486	2.67156	5.85497	-0.00213127	0.0574711	1.27224	0.603943
ENSMUSG00000004709	Cd244a	1	+	171559193	171609746	CD244 molecule A [Source:MGI Symbol;Acc:MGI:109294]	protein_coding	9.87661	10.8949	1.92727	34.0395	0.852298	23.714	8.44222	25.3685	0.208179	2.92801	3.18941	15.6795	22.5899	5.71595	11.6739	0.750107	1.66757	9.92561
ENSMUSG00000004730	Adgre1	17	+	57358691	57483527	adhesion G protein-coupled receptor E1 [Source:MGI Symbol;Acc:MGI:106912]	protein_coding	4.88338	11.2795	2.50473	3.28716	3.71638	5.15442	0.157122	2.90777	4.2268	7.94342	8.36434	9.22743	0.153162	4.15232	16.5678	4.77809	1.69006	45.1554
ENSMUSG00000004748	Mtfp1	11	-	4091480	4095445	mitochondrial fission process 1 [Source:MGI Symbol;Acc:MGI:1916686]	protein_coding	0.641735	0.116328	0.509275	1.73924	2.58449	1.65071	-0.25352	-0.0715579	0.544041	122.909	2.83758	11.082	0.0407257	-0.0343345	-0.00496806	0.158842	0.223914	-0.294942
ENSMUSG00000004768	Rab23	1	+	33719887	33742564	RAB23, member RAS oncogene family [Source:MGI Symbol;Acc:MGI:99833]	protein_coding	7.57421	4.65555	5.87407	1.37482	0.763985	2.4021	0.376176	1.66574	0.432327	7.13734	9.20606	5.20033	0.450215	0.113922	0.0770147	-0.117177	0.780123	0.931459
ENSMUSG00000004771	Rab11a	9	-	64715299	64737758	RAB11A, member RAS oncogene family [Source:MGI Symbol;Acc:MGI:1858202]	protein_coding	12.355	16.2312	10.2372	92.9523	18.8922	6.88838	71.3252	4.27539	4.15904	24.7507	9.3259	10.4558	171.536	42.96	61.4071	29.5986	6.83624	2.59482
ENSMUSG00000004788	Eif2b2	12	+	85219481	85226628	eukaryotic translation initiation factor 2B, subunit 2 beta [Source:MGI Symbol;Acc:MGI:2145118]	protein_coding	1.71156	4.66366	5.37947	28.9866	9.08385	24.9148	-0.0676201	2.0144	1.88243	5.87872	5.88907	8.30303	15.9291	54.5708	2.85367	-0.312656	3.86613	0.144844
ENSMUSG00000004789	Dlst	12	+	85110833	85134845	dihydrolipoamide S-succinyltransferase (E2 component of 2-oxo-glutarate complex) [Source:MGI Symbol;Acc:MGI:1926170]	protein_coding	90.165	22.685	14.2226	3.4882	10.8615	12.1542	6.51177	5.78811	1.5514	13.7889	24.0271	11.251	22.0226	9.82514	14.8434	6.94622	3.71222	19.2027
ENSMUSG00000004791	Pgf	12	-	85166635	85177790	placental growth factor [Source:MGI Symbol;Acc:MGI:105095]	protein_coding	1.04885	-0.053059	3.90951	1.99264	0.202094	0.241719	0.113235	0.415875	1.50199	3.40343	6.14104	3.32288	0.0586101	-0.0445858	-0.0112824	2.58368	1.71319	0.192787
ENSMUSG00000004798	Ulk2	11	-	61775649	61855073	unc-51 like kinase 2 [Source:MGI Symbol;Acc:MGI:1352758]	protein_coding	0.477713	-0.000457297	3.32595	14.5032	0.769653	0.944376	2.80958	0.666505	0.588309	2.61821	3.36215	2.96456	2.49514	4.07007	5.04386	2.18017	0.731463	0.0566138
ENSMUSG00000004814	Ccl24	5	-	135569937	135573049	chemokine (C-C motif) ligand 24 [Source:MGI Symbol;Acc:MGI:1928953]	protein_coding	0.3087	-0.0604493	1.0941	0.299555	1.4941	1.23794	0.155122	0.43646	1.26989	2.66311	1.91094	2.46538	0.021433	-0.0160094	-0.00505477	0.547046	0.328717	0.221185
ENSMUSG00000004815	Dgkq	5	-	108646693	108669672	diacylglycerol kinase, theta [Source:MGI Symbol;Acc:MGI:102918]	protein_coding	0.679405	0.0234418	0.704914	0.972867	0.696788	1.36748	-0.0747832	0.593061	0.804269	4.62006	2.14041	2.34244	0.0422705	-0.0338273	0.823454	2.00494	0.819445	3.84887
ENSMUSG00000004821	Tmed11	5	-	108777235	108795363	transmembrane p24 trafficking protein 11 [Source:MGI Symbol;Acc:MGI:1914616]	protein_coding	0.280619	-0.020335	1.07283	0.789668	0.0676512	1.3487	0.0421848	0.883232	0.317197	1.89134	1.96151	0.749074	0.0198283	-0.0155654	-0.0039387	-0.240473	0.521868	0.0686095
ENSMUSG00000004837	Grap	11	+	61653265	61672784	GRB2-related adaptor protein [Source:MGI Symbol;Acc:MGI:1918770]	protein_coding	1.40303	0.352916	5.75876	120.095	7.7692	7.22241	1.93599	10.505	0.675792	21.5648	6.60943	19.3247	0.285428	13.8809	3.65393	8.47906	0.762749	-0.468707
ENSMUSG00000004842	Pou1f1	16	+	65520511	65535005	POU domain, class 1, transcription factor 1 [Source:MGI Symbol;Acc:MGI:97588]	protein_coding	9.94645	0.628981	5.88555	1.40109	0.38427	1.41854	0.793135	0.324433	0.287861	5.50491	3.75913	2.8233	-0.0078515	0.011216	0.242772	4.24583	0.490283	1.75907
ENSMUSG00000004843	Chmp2b	16	-	65539128	65562726	charged multivesicular body protein 2B [Source:MGI Symbol;Acc:MGI:1916192]	protein_coding	14.5801	-0.00472614	8.34496	2.01913	9.90953	4.70484	-0.0110498	0.471975	0.819566	5.25381	5.9274	4.59423	90.9067	56.6245	58.7526	1.65031	1.3688	0.228029
ENSMUSG00000004846	Plod3	5	+	136987019	136996648	procollagen-lysine, 2-oxoglutarate 5-dioxygenase 3 [Source:MGI Symbol;Acc:MGI:1347008]	protein_coding	16.5903	5.63997	5.17943	0.816217	1.37863	2.01888	9.2776	6.94036	1.40223	7.74002	3.35074	5.26994	20.9884	13.196	13.2894	0.673894	1.96201	0.302558
ENSMUSG00000004849	Ap1s1	5	-	137034993	137046135	adaptor protein complex AP-1, sigma 1 [Source:MGI Symbol;Acc:MGI:1098244]	protein_coding	3.72647	2.64758	5.67144	3.85537	12.6677	6.30901	35.4001	8.36982	9.91832	12.4177	10.9541	12.8448	68.2762	41.8909	21.0511	3.034	7.53514	-0.21608
ENSMUSG00000004864	Mapk13	17	+	28769297	28780233	mitogen-activated protein kinase 13 [Source:MGI Symbol;Acc:MGI:1346864]	protein_coding	7.58503	-0.0980457	0.0871436	1.06916	0.864464	1.0497	0.290804	3.82188	0.481902	2.25105	4.06729	3.271	0.764512	11.9436	-0.00227818	1.26076	0.500152	26.1206
ENSMUSG00000004865	Srpk1	17	-	28587648	28622709	serine/arginine-rich protein specific kinase 1 [Source:MGI Symbol;Acc:MGI:106908]	protein_coding	33.4118	6.58099	10.5149	0.651818	6.82807	8.382	27.7348	5.29174	130.327	9.25692	15.0879	22.5436	18.1142	20.0356	15.1763	20.6991	1.03276	43.92
ENSMUSG00000004872	Pax3	1	-	78101267	78197134	paired box 3 [Source:MGI Symbol;Acc:MGI:97487]	protein_coding	7.03885	4.91593	3.24141	0.568142	0.418133	0.435035	0.944798	0.317699	0.103036	4.68565	2.35544	2.5885	-0.0163135	0.0184827	-0.00186425	1.40427	0.224962	1.15474
ENSMUSG00000004880	Lbr	1	-	181815335	181843046	lamin B receptor [Source:MGI Symbol;Acc:MGI:2138281]	protein_coding	42.589	34.8654	18.3435	97.9953	31.2272	237.458	20.2832	23.4255	13.8376	39.0935	3.8192	27.8295	223.449	242.616	290.437	27.6816	16.2979	135.5
ENSMUSG00000004885	Crabp2	3	+	87948666	87953376	cellular retinoic acid binding protein II [Source:MGI Symbol;Acc:MGI:88491]	protein_coding	1.29261	0.0555276	6.62371	1.46261	1.19553	0.607127	-0.15335	0.364826	1.60496	2.72536	3.58347	0.756765	0.0685693	-0.0539544	-0.0107974	4.52717	5.82243	-0.156082
ENSMUSG00000004891	Nes	3	+	87971078	87980451	nestin [Source:MGI Symbol;Acc:MGI:101784]	protein_coding	0.262732	2.14711	0.720057	0.709655	0.836579	0.266721	0.340216	0.180869	0.47019	2.62255	6.53426	4.2682	0.0482216	0.00611568	1.09484	1.06139	0.409375	0.666536
ENSMUSG00000004892	Bcan	3	-	87987531	88000230	brevican [Source:MGI Symbol;Acc:MGI:1096385]	protein_coding	1.93942	-0.0723065	1.16576	0.981172	1.38807	0.336182	0.198911	0.425614	0.24192	2.32642	4.16721	3.75286	0.00957428	-0.00628902	-0.00321469	0.284263	0.217217	0.437268
ENSMUSG00000004894	Hapln2	3	-	88021750	88027583	hyaluronan and proteoglycan link protein 2 [Source:MGI Symbol;Acc:MGI:2137300]	protein_coding	8.33196	1.83561	2.12941	0.268298	0.419559	1.17746	0.469389	0.668054	-0.00776422	1.73052	2.012	2.22095	0.034568	1.07542	7.60793e-05	-0.422044	0.117145	0.621961
ENSMUSG00000004895	Prcc	3	-	87858903	87885608	papillary renal cell carcinoma (translocation-associated) [Source:MGI Symbol;Acc:MGI:2137738]	protein_coding	3.02123	0.00513115	2.55516	1.02681	1.59735	0.410487	0.049449	0.3493	0.296291	3.72228	3.76028	4.00886	1.43195	6.48283	-0.00366225	0.46038	0.523335	0.168411
ENSMUSG00000004896	Rrnad1	3	-	87922601	87930717	ribosomal RNA adenine dimethylase domain containing 1 [Source:MGI Symbol;Acc:MGI:2387197]	protein_coding	2.77713	0.65686	4.19621	14.6811	1.60176	1.21538	0.237844	1.14474	0.641418	3.96737	3.93233	2.40619	0.239474	1.29381	9.35671	3.24284	0.697654	0.369204
ENSMUSG00000004897	Hdgf	3	+	87906321	87916132	heparin binding growth factor [Source:MGI Symbol;Acc:MGI:1194494]	protein_coding	20.3041	8.87935	8.82184	203.738	54.4425	170.54	107.577	114.112	17.1853	9.45987	17.176	25.492	93.2231	69.0913	62.2741	27.5	97.0921	18.6854
ENSMUSG00000004902	Slc25a18	6	+	120773578	120794336	solute carrier family 25 (mitochondrial carrier), member 18 [Source:MGI Symbol;Acc:MGI:1919053]	protein_coding	0.220402	-0.0159275	-0.167336	0.395031	0.0535419	1.35393	0.0325813	0.58954	0.247647	25.6115	3.43119	2.88393	0.0159386	3.30651	-0.00316354	-0.196874	0.182185	0.0779139
ENSMUSG00000004929	Thop1	10	+	81070035	81082559	thimet oligopeptidase 1 [Source:MGI Symbol;Acc:MGI:1354165]	protein_coding	1.15764	0.0732795	2.13204	0.992311	3.91879	1.16827	-0.0642996	-0.0360534	1.25044	2.30406	6.63193	7.38156	0.0634814	-0.0505622	-0.00961608	-0.208079	0.6889	-0.161153
ENSMUSG00000004931	Apba3	10	+	81266960	81273246	amyloid beta (A4) precursor protein-binding, family A, member 3 [Source:MGI Symbol;Acc:MGI:1888527]	protein_coding	1.20551	0.376313	1.62972	1.24002	2.41366	0.843706	0.215468	1.19111	1.27849	3.33009	6.30606	8.19335	1.28547	0.984905	20.9771	-0.214733	1.83928	-0.204071
ENSMUSG00000004933	Matk	10	+	81252935	81263365	megakaryocyte-associated tyrosine kinase [Source:MGI Symbol;Acc:MGI:99259]	protein_coding	0.870453	3.76581	2.77502	1.29977	1.9964	1.53601	-0.112091	0.0741534	0.896193	3.4986	6.46987	9.0341	0.0513164	13.6421	-0.00821211	-0.244329	0.696353	-0.00806339
ENSMUSG00000004934	Pias4	10	-	81153266	81167923	protein inhibitor of activated STAT 4 [Source:MGI Symbol;Acc:MGI:2136940]	protein_coding	3.51505	6.89464	4.84275	1.25216	5.73361	1.66455	0.224659	0.308154	1.11458	5.28444	5.79862	6.03229	4.07884	6.85176	11.017	0.473655	1.4455	0.240927
ENSMUSG00000004936	Map2k1	9	-	64185770	64253631	mitogen-activated protein kinase kinase 1 [Source:MGI Symbol;Acc:MGI:1346866]	protein_coding	31.8247	9.04062	2.67539	0.829448	7.54747	5.03655	7.78828	1.12045	1.40857	5.62151	278.991	11.536	68.6551	13.8197	22.9968	11.0999	3.00226	49.7286
ENSMUSG00000004937	Sgta	10	-	81044075	81060181	small glutamine-rich tetratricopeptide repeat (TPR)-containing, alpha [Source:MGI Symbol;Acc:MGI:1098703]	protein_coding	9.72864	7.42886	5.19657	1.37886	12.226	3.50575	-0.115742	2.16599	2.41286	4.78941	10.2407	13.6918	25.7525	24.0762	30.0153	1.7094	3.67142	8.86433
ENSMUSG00000004939	Nmrk2	10	-	81198170	81202051	nicotinamide riboside kinase 2 [Source:MGI Symbol;Acc:MGI:1916814]	protein_coding	4.65529	-0.0789162	2.3576	0.589514	0.105328	1.29321	0.224438	0.154433	0.149333	1.74934	3.21024	2.15079	0.00271334	-0.000573914	-0.00213331	0.0221402	0.156038	0.300044
ENSMUSG00000004945	Tmem242	17	-	5410870	5440259	transmembrane protein 242 [Source:MGI Symbol;Acc:MGI:1917794]	protein_coding	14.5649	8.08139	5.84568	9.82156	4.01037	26.7329	46.925	5.95826	451.429	3.50207	5.73188	15.3257	116.903	17.3135	55.6009	14.0215	1.07158	98.7561
ENSMUSG00000004947	Dtx2	5	+	135994800	136032872	deltex 2, E3 ubiquitin ligase [Source:MGI Symbol;Acc:MGI:1921448]	protein_coding	2.33484	0.747841	1.81297	1.01314	1.66572	1.42955	0.332495	0.556533	0.955266	6.27883	4.45837	4.26513	3.21511	-0.0221213	0.746944	0.113503	0.606697	0.425239
ENSMUSG00000004948	Zp3	5	+	135980099	135988624	zona pellucida glycoprotein 3 [Source:MGI Symbol;Acc:MGI:99215]	protein_coding	0.164747	-0.129463	-0.0137623	0.970015	19.7751	1.41599	0.402204	0.25841	0.649424	1.63612	1.28881	1.07394	0.011703	-0.00673851	-0.00486189	3.31315	1.71241	0.55714
ENSMUSG00000004951	Hspb1	5	+	135887919	135889563	heat shock protein 1 [Source:MGI Symbol;Acc:MGI:96240]	protein_coding	2.91007	0.217542	11.7224	0.975338	1.08855	0.562851	-0.375028	0.853745	2.43023	2.10944	4.62856	1.82488	0.115607	-0.0893982	-0.0156256	-0.0801626	2.96448	-0.463955
ENSMUSG00000004952	Rasa4	5	+	136083916	136111860	RAS p21 protein activator 4 [Source:MGI Symbol;Acc:MGI:1858600]	protein_coding	32.5351	2.62389	9.64215	7.03143	3.57042	3.37176	0.81871	2.41881	0.855566	12.5531	6.63726	6.86994	0.726091	7.46101	6.98427	2.45256	0.736557	1.58997
ENSMUSG00000004961	Syt5	7	-	4539765	4547541	synaptotagmin V [Source:MGI Symbol;Acc:MGI:1926368]	protein_coding	0.440097	-0.00495981	1.02173	0.682206	0.07	0.643497	-0.00189736	0.864955	1.23423	2.85632	2.02657	2.08321	0.0294714	-0.0234379	-0.00531442	-0.250674	0.968328	0.017205
ENSMUSG00000004980	Hnrnpa2b1	6	-	51460932	51469894	heterogeneous nuclear ribonucleoprotein A2/B1 [Source:MGI Symbol;Acc:MGI:104819]	protein_coding	140.193	313.871	257.811	800.934	495.791	2220.39	642.802	69.4668	732.306	55.2248	364.821	249.784	1273.58	1311.02	1104.63	2090.78	446.318	529.858
ENSMUSG00000004988	Fxyd4	6	-	117933559	117937692	FXYD domain-containing ion transport regulator 4 [Source:MGI Symbol;Acc:MGI:1889005]	protein_coding	0.486969	-0.123148	0.00975356	0.56608	0.242645	52.3194	0.364214	-0.0374551	0.973459	2.94777	3.2174	2.27982	0.892515	-0.0226279	-0.00820379	-0.591863	0.608918	0.723479
ENSMUSG00000004994	Ccdc130	8	-	84257795	84270380	coiled-coil domain containing 130 [Source:MGI Symbol;Acc:MGI:1914986]	protein_coding	0.155787	6.09247	8.39133	0.164758	1.53941	2.15391	0.100455	0.453334	0.404104	5.21991	2.1705	5.382	8.59026	6.64091	2.31153	2.29191	351.348	0.139778
ENSMUSG00000004996	Mri1	8	-	84249906	84257326	methylthioribose-1-phosphate isomerase 1 [Source:MGI Symbol;Acc:MGI:1915123]	protein_coding	0.595311	1.40176	4.63054	0.378309	3.80949	2.34574	0.0400431	1.47047	10.0237	2.04005	4.34128	2.68528	4.49613	4.60931	8.21568	0.159041	1.32411	0.170226
ENSMUSG00000005034	Prkacb	3	-	146729574	146812990	protein kinase, cAMP dependent, catalytic, beta [Source:MGI Symbol;Acc:MGI:97594]	protein_coding	16.43	6.32841	6.41189	7.89453	4.72587	3.03328	4.27095	2.19589	1.67319	37.0021	9.62089	20.7022	28.5703	16.3236	18.3334	5.58489	1.88265	3.72655
ENSMUSG00000005043	Sgsh	11	-	119343425	119355536	N-sulfoglucosamine sulfohydrolase (sulfamidase) [Source:MGI Symbol;Acc:MGI:1350341]	protein_coding	1.71302	0.174126	0.384508	0.18639	29.2313	0.954639	0.255225	1.75307	0.456335	1.21127	2.38375	4.64657	0.260675	1.3728	4.16747	0.46003	0.14118	2.21773
ENSMUSG00000005045	Chd5	4	+	152338651	152390194	chromodomain helicase DNA binding protein 5 [Source:MGI Symbol;Acc:MGI:3036258]	protein_coding	2.85647	1.88471	0.984235	0.443214	0.422629	0.819366	0.47248	0.658169	0.0791663	2.12253	1.6235	1.82961	-0.0123723	0.013376	-0.000837583	-0.0306844	0.2496	0.84379
ENSMUSG00000005054	Cstb	10	+	78425669	78427622	cystatin B [Source:MGI Symbol;Acc:MGI:109514]	protein_coding	108.887	33.668	16.1727	210.011	16.1034	16.458	21.4453	710.073	6.21553	192.283	30.7701	18.3635	254.178	279.455	283.094	56.2066	18.0944	70.0583
ENSMUSG00000005057	Sh2b2	5	-	136218147	136246556	SH2B adaptor protein 2 [Source:MGI Symbol;Acc:MGI:1345171]	protein_coding	1.32066	2.76249	4.96072	1.23082	0.508955	1.19972	0.135741	0.148099	1.10183	4.15871	8.17116	5.79864	1.79876	1.52147	1.39272	1.20147	0.877949	0.405224
ENSMUSG00000005069	Pex5	6	-	124396816	124415067	peroxisomal biogenesis factor 5 [Source:MGI Symbol;Acc:MGI:1098808]	protein_coding	5.86937	13.8273	3.8267	1.09995	1.64783	1.61691	0.106875	20.1957	0.915948	2.47989	4.75035	4.64263	4.5411	9.54345	5.2739	-0.468897	1.2811	0.30507
ENSMUSG00000005078	Jkamp	12	+	72085589	72101461	JNK1/MAPK8-associated membrane protein [Source:MGI Symbol;Acc:MGI:1915057]	protein_coding	23.0897	14.3188	15.1863	48.9118	7.68368	7.27264	10.0322	4.01255	0.34886	2.67875	4.76115	6.9715	1.61476	26.9208	44.6132	22.0877	644.62	15.2068
ENSMUSG00000005087	Cd44	2	-	102811141	102901665	CD44 antigen [Source:MGI Symbol;Acc:MGI:88338]	protein_coding	14.4499	10.9448	23.3882	93.1482	8.11753	54.9469	6.34253	13.5952	18.3139	54.24	118.162	8.53509	59.7513	49.314	54.1085	5.3916	5.5918	3.28553
ENSMUSG00000005089	Slc1a2	2	+	102658659	102790784	solute carrier family 1 (glial high affinity glutamate transporter), member 2 [Source:MGI Symbol;Acc:MGI:101931]	protein_coding	5.0476	1.84289	6.6628	1.23991	0.525278	1.98412	0.320814	2.28846	1.28681	7.01922	14.0596	9.21324	0.102616	-0.0292642	-0.00940888	0.336783	0.773532	0.574468
ENSMUSG00000005102	Eif2ak4	2	+	118388618	118475234	eukaryotic translation initiation factor 2 alpha kinase 4 [Source:MGI Symbol;Acc:MGI:1353427]	protein_coding	0.317102	1.61183	1.95527	20.4894	1.96043	0.591636	0.0348087	1.18066	0.437141	6.03569	3.65473	2.9949	0.394197	4.2601	2.87178	1.48945	0.620005	0.112816
ENSMUSG00000005103	Wdr1	5	-	38526813	38563221	WD repeat domain 1 [Source:MGI Symbol;Acc:MGI:1337100]	protein_coding	2.06401	12.7393	35.8603	36.4392	77.3383	33.8151	54.9298	96.9323	259.223	43.5812	38.2015	48.9173	116.241	61.3009	66.9	54.2228	684.183	6.97969
ENSMUSG00000005107	Slc2a9	5	-	38349273	38503143	solute carrier family 2 (facilitated glucose transporter), member 9 [Source:MGI Symbol;Acc:MGI:2152844]	protein_coding	2.31681	0.421361	1.69266	2.43116	1.66533	2.15091	1.02312	0.967932	0.586732	9.87461	3.72438	8.47361	0.0186864	-0.0129251	0.272735	1.46253	0.386852	0.667202
ENSMUSG00000005124	Ccn4	15	+	66891320	66923201	cellular communication network factor 4 [Source:MGI Symbol;Acc:MGI:1197008]	protein_coding	1.43888	0.997207	1.22568	0.479509	0.188988	0.59042	0.549634	0.143357	0.382852	5.23054	8.40147	5.02889	0.00789546	-0.0037119	-0.00413706	0.590557	0.558307	0.738606
ENSMUSG00000005125	Ndrg1	15	-	66929318	66969640	N-myc downstream regulated gene 1 [Source:MGI Symbol;Acc:MGI:1341799]	protein_coding	8.35811	4.24707	7.94162	176.89	1.26963	2.2075	-0.233576	2.30848	0.883111	4.51548	14.6532	8.50241	29.3414	10.1609	16.4413	3.38993	1.05067	16.762
ENSMUSG00000005131	4930550C14Rik	9	+	53402325	53434402	RIKEN cDNA 4930550C14 gene [Source:MGI Symbol;Acc:MGI:1922561]	protein_coding	0.0956408	2.77509	0.0573777	1.01156	0.201109	0.847955	0.435462	-0.0194815	0.313868	5.82876	4.63308	3.1644	0.00675182	-0.00256518	0.0371199	0.817631	0.318664	1.18865
ENSMUSG00000005142	Man2b1	8	+	85083270	85098282	mannosidase 2, alpha B1 [Source:MGI Symbol;Acc:MGI:107286]	protein_coding	16.5044	11.1065	9.41565	52.0063	8.3544	46.4085	18.9527	2.95761	1.6789	12.6574	11.519	11.0632	17.823	27.0811	16.3668	1.79943	2.22863	-0.239974
ENSMUSG00000005148	Klf5	14	+	99298691	99315036	Kruppel-like factor 5 [Source:MGI Symbol;Acc:MGI:1338056]	protein_coding	10.1441	4.62017	3.14046	1.11581	1.31971	0.628932	10.7103	1.5324	0.660577	2.82121	3.56434	3.21389	0.750605	0.146636	1.28674	2.29564	0.425884	0.581362
ENSMUSG00000005150	Wdr83	8	-	85075035	85081306	WD repeat domain containing 83 [Source:MGI Symbol;Acc:MGI:1915086]	protein_coding	1.51846	0.207418	0.753742	0.722002	4.22556	2.87291	8.53994	0.765205	2.21632	1.95571	5.8782	7.25511	0.149203	3.64095	-0.00955367	0.219244	1.2144	-0.384375
ENSMUSG00000005161	Prdx2	8	+	84969587	84974834	peroxiredoxin 2 [Source:MGI Symbol;Acc:MGI:109486]	protein_coding	163.257	42.8175	15.4504	7.33247	88.316	131.975	29.2846	9.68396	10.6284	131.102	610.851	390.269	160.549	94.6162	75.5813	27.1793	14.628	139.748
ENSMUSG00000005198	Polr2a	11	-	69733997	69758637	polymerase (RNA) II (DNA directed) polypeptide A [Source:MGI Symbol;Acc:MGI:98086]	protein_coding	1.40996	3.21803	2.07429	6.10692	14.1657	50.9678	12.0025	3.19081	54.121	1.81288	3.97168	5.06132	46.3576	20.1801	26.5895	2.16348	1.07854	8.2387
ENSMUSG00000005202	Shbg	11	-	69614804	69617905	sex hormone binding globulin [Source:MGI Symbol;Acc:MGI:98295]	protein_coding	0.342875	0.00735521	0.551666	0.593623	0.750407	0.44672	0.00801155	-0.228677	0.335544	2.08374	2.91832	3.88595	0.0238001	-0.0192461	-0.00407919	-0.165434	0.417754	0.0177445
ENSMUSG00000005204	Senp3	11	-	69673115	69682084	SUMO/sentrin specific peptidase 3 [Source:MGI Symbol;Acc:MGI:2158736]	protein_coding	-0.101863	0.0714003	10.5711	0.181793	4.59643	10.6914	51.5735	16.4924	283.265	13.8126	2.75769	19.0046	2.67475	14.4032	14.2099	12.1566	0.675365	0.50467
ENSMUSG00000005220	Corin	5	-	72300025	72504473	corin, serine peptidase [Source:MGI Symbol;Acc:MGI:1349451]	protein_coding	3.41522	5.35846	4.82724	0.877223	0.471604	1.16751	0.446368	2.36003	0.707971	5.00173	2.45158	2.50958	0.125814	-0.00246515	-0.00420417	0.28766	0.49348	1.00311
ENSMUSG00000005225	Plekha8	6	+	54595111	54645839	pleckstrin homology domain containing, family A (phosphoinositide binding specific) member 8 [Source:MGI Symbol;Acc:MGI:2681164]	protein_coding	0.451526	1.63331	1.36516	0.968879	0.975673	1.61978	0.220324	0.622309	0.782134	9.95246	2.50225	3.03122	0.134595	0.0632503	-0.00679305	0.939671	0.823613	0.496446
ENSMUSG00000005232	G6pc2	2	+	69211073	69227841	glucose-6-phosphatase, catalytic, 2 [Source:MGI Symbol;Acc:MGI:1277193]	protein_coding	2.70835	2.35998	2.28234	0.966529	0.653577	0.936823	1.01879	0.428146	0.111617	4.34361	1.79495	2.34587	-0.0142178	0.0163989	0.0318251	2.38613	14.2806	1.39686
ENSMUSG00000005233	Spc25	2	-	69193895	69206194	SPC25, NDC80 kinetochore complex component, homolog (S. cerevisiae) [Source:MGI Symbol;Acc:MGI:1913692]	protein_coding	15.4146	-0.0778144	14.4712	3.42727	11.6335	1.69252	0.390532	7.69451	0.190781	4.62986	6.70801	4.95793	110.597	104.364	109.371	7.63628	2.17742	0.29525
ENSMUSG00000005237	Dnah2	11	-	69420809	69549110	dynein, axonemal, heavy chain 2 [Source:MGI Symbol;Acc:MGI:107731]	protein_coding	2.58169	-0.194334	3.42968	0.9	0.926589	0.228781	0.734745	0.160246	0.716202	4.27359	4.02586	2.90844	0.805548	0.0015149	0.203157	8.60282	0.694655	1.28406
ENSMUSG00000005251	Ripk4	16	-	97741933	97763787	receptor-interacting serine-threonine kinase 4 [Source:MGI Symbol;Acc:MGI:1919638]	protein_coding	0.401413	3.23724	1.17076	0.603758	0.0679819	0.682584	0.00514152	0.134347	0.509115	2.50134	1.86209	3.48893	0.0711243	-0.0216444	-0.00497212	-0.24411	0.290745	0.101437
ENSMUSG00000005262	Ufd1	16	+	18811779	18835261	ubiquitin recognition factor in ER-associated degradation 1 [Source:MGI Symbol;Acc:MGI:109353]	protein_coding	47.935	17.8294	6.71934	1.20622	89.7097	9.55359	10.3291	3.30769	1.07043	7.40024	10.3448	26.0175	30.2679	18.8651	36.8671	16.7351	1.30963	39.8373
ENSMUSG00000005267	Zfp287	11	-	62700356	62731905	zinc finger protein 287 [Source:MGI Symbol;Acc:MGI:2176561]	protein_coding	3.86408	7.34663	3.59898	1.78416	2.64464	0.988186	0.149166	1.38271	0.895345	6.1315	5.55315	7.59212	0.0350353	6.95486	-0.00743197	1.23052	1.21508	2.77993
ENSMUSG00000005268	Prlr	15	+	10177238	10349180	prolactin receptor [Source:MGI Symbol;Acc:MGI:97763]	protein_coding	7.76456	5.41873	4.6154	2.11308	1.27543	1.42834	0.895465	0.518961	0.58544	4.61133	7.63787	7.89106	0.0229586	0.00527125	0.0378194	2.02387	1.22391	3.20007
ENSMUSG00000005299	Letm1	5	-	33739673	33782817	leucine zipper-EF-hand containing transmembrane protein 1 [Source:MGI Symbol;Acc:MGI:1932557]	protein_coding	15.8156	9.70722	3.32398	8.00732	3.97894	4.67225	1.47775	4.57078	0.54486	48.9016	6.40721	8.21964	3.82952	5.30468	6.42846	0.71851	1.01176	2.59766
ENSMUSG00000005312	Ubqln1	13	-	58176156	58215653	ubiquilin 1 [Source:MGI Symbol;Acc:MGI:1860276]	protein_coding	18.5014	13.7473	38.7609	4.59794	10.2939	4.62131	7.29046	12.1317	20.2021	18.0631	235.292	5.21596	4.90895	8.75477	13.5534	12.5973	3.46634	0.905217
ENSMUSG00000005320	Fgfr4	13	+	55152640	55168759	fibroblast growth factor receptor 4 [Source:MGI Symbol;Acc:MGI:95525]	protein_coding	0.190101	-0.0626346	-0.103589	0.505265	0.108841	0.556653	0.196049	1.00072	0.463087	1.94636	1.73221	2.28178	0.0137209	-0.00982909	-0.00374283	-0.34663	0.244424	0.346603
ENSMUSG00000005338	Cadm3	1	-	173333258	173367695	cell adhesion molecule 3 [Source:MGI Symbol;Acc:MGI:2137858]	protein_coding	3.12951	2.88022	1.16007	0.604034	0.267351	1.14418	0.531685	0.447641	0.151743	2.51812	1.89549	3.90319	-0.0195667	0.103261	0.0580834	-0.219699	0.185724	0.834857
ENSMUSG00000005339	Fcer1a	1	-	173221284	173227214	Fc receptor, IgE, high affinity I, alpha polypeptide [Source:MGI Symbol;Acc:MGI:95494]	protein_coding	0.655982	4.11736	2.44978	1.74261	4.56479	1.60336	0.00136925	2.95245	0.68342	4.26058	1.79499	2.09969	0.0409814	-0.0322324	19.0791	-0.334055	0.947156	0.0291458
ENSMUSG00000005354	Txn2	15	-	77915047	77929006	thioredoxin 2 [Source:MGI Symbol;Acc:MGI:1929468]	protein_coding	145.663	0.475135	3.23189	2.26929	110.931	8.68777	33.3495	12.9393	4.82013	11.4856	191.926	22.2413	41.9338	79.4588	90.5789	23.4407	6.47242	39.9284
ENSMUSG00000005355	Casp14	10	-	78711991	78718294	caspase 14 [Source:MGI Symbol;Acc:MGI:1335092]	protein_coding	0.153069	-0.127899	-0.00556177	0.570298	0.197467	0.0133176	0.396519	-0.0833799	0.36623	2.45869	3.28555	2.57041	0.0108977	-0.00612553	-0.00468339	1.85016	0.348448	0.679396
ENSMUSG00000005357	Slc1a6	10	+	78780496	78814765	solute carrier family 1 (high affinity aspartate/glutamate transporter), member 6 [Source:MGI Symbol;Acc:MGI:1096331]	protein_coding	0.086167	-0.10372	0.0272106	0.648762	0.14898	1.03622	0.307952	0.41387	0.243602	2.05031	2.37929	2.92168	0.0618043	0.174243	-0.00330164	0.0075487	0.241739	0.418555
ENSMUSG00000005360	Slc1a3	15	-	8634124	8710764	solute carrier family 1 (glial high affinity glutamate transporter), member 3 [Source:MGI Symbol;Acc:MGI:99917]	protein_coding	7.48884	10.076	4.26762	1.64748	2.55244	2.4891	1.3517	1.68837	0.541105	9.60461	8.16221	8.03864	0.904378	0.502596	1.61261	1.68145	0.508017	1.63716
ENSMUSG00000005362	Crbn	6	-	106780201	106800077	cereblon [Source:MGI Symbol;Acc:MGI:1913277]	protein_coding	4.92548	11.8408	12.4163	1.11216	11.4082	4.47615	0.069284	4.86785	1.01237	6.08619	6.45942	8.9834	0.181683	22.1199	14.1292	3.0488	1.49847	0.167103
ENSMUSG00000005364	Il5ra	6	-	106710357	106749037	interleukin 5 receptor, alpha [Source:MGI Symbol;Acc:MGI:96558]	protein_coding	5.01241	1.04531	2.49986	0.255501	0.617699	0.496582	0.525927	0.304359	-0.00332881	2.52122	1.56374	2.89467	0.0438552	1.37687	-0.000282745	1.10419	0.195544	0.703048
ENSMUSG00000005370	Msh6	17	+	87975062	87990892	mutS homolog 6 [Source:MGI Symbol;Acc:MGI:1343961]	protein_coding	5.18109	3.92775	3.68121	0.70634	3.44599	1.89267	0.169185	0.506521	0.47939	66.9247	2.39042	5.06802	6.61088	4.49701	21.8034	0.769779	0.636943	0.272052
ENSMUSG00000005371	Fbxo11	17	-	87990859	88065291	F-box protein 11 [Source:MGI Symbol;Acc:MGI:2147134]	protein_coding	2.18979	1.2435	4.15504	18.4154	3.47356	1.6108	0.296207	1.41082	0.771159	3.2802	3.81483	2.64993	17.86	9.41558	5.88405	2.26163	1.06243	0.547108
ENSMUSG00000005373	Mlxipl	5	+	135089890	135138382	MLX interacting protein-like [Source:MGI Symbol;Acc:MGI:1927999]	protein_coding	6.13395	2.42391	9.658	1.25414	1.81074	1.17166	0.755177	0.0200226	0.847265	9.88837	5.06052	2.44313	0.560194	-0.00510538	0.0449375	5.81549	2.07407	1.00442
ENSMUSG00000005374	Tbl2	5	+	135149657	135165760	transducin (beta)-like 2 [Source:MGI Symbol;Acc:MGI:1351652]	protein_coding	5.21906	1.68317	0.186959	0.469024	1.06021	0.846359	4.73864	1.38277	0.64531	2.36732	2.04587	3.63908	2.59673	2.27382	1.78507	3.28642	0.455948	8.54217
ENSMUSG00000005378	Bud23	5	-	135052957	135064959	BUD23, rRNA methyltransferase and ribosome maturation factor [Source:MGI Symbol;Acc:MGI:1913388]	protein_coding	1.57222	10.7078	4.05291	3.40402	8.95496	4.29321	-0.0248172	2.54249	1.80991	10.4668	6.1718	7.25854	16.8642	18.8058	27.4269	-0.34096	1.61414	0.062861
ENSMUSG00000005397	Nid1	13	+	13437551	13512269	nidogen 1 [Source:MGI Symbol;Acc:MGI:97342]	protein_coding	5.14726	3.187	1.85041	0.385869	0.549558	0.738484	0.5808	0.568569	0.0914662	3.28618	2.75969	2.25696	0.351814	0.03975	0.213632	0.438562	0.328667	1.708
ENSMUSG00000005410	Mcm5	8	+	75109569	75128439	minichromosome maintenance complex component 5 [Source:MGI Symbol;Acc:MGI:103197]	protein_coding	7.08327	4.96639	1.54385	20.7182	11.1598	9.10996	19.579	5.01907	16.4093	2.9166	4.40795	11.4531	28.1718	47.2727	45.227	11.1979	2.29603	25.7273
ENSMUSG00000005413	Hmox1	8	+	75093621	75100589	heme oxygenase 1 [Source:MGI Symbol;Acc:MGI:96163]	protein_coding	41.8612	47.9363	22.5789	20.7682	45.7893	154.266	1.30841	7.22727	2.22766	121.385	95.7174	101.422	57.1209	7.7021	0.517503	12.1511	257.773	200.054
ENSMUSG00000005417	Mprip	11	+	59661305	59780860	myosin phosphatase Rho interacting protein [Source:MGI Symbol;Acc:MGI:1349438]	protein_coding	4.6612	2.41321	2.19539	1.49136	2.17505	2.46571	2.81441	1.30739	0.725305	22.3956	4.48763	7.02597	8.9182	8.97921	6.02093	2.594	1.16033	0.175458
ENSMUSG00000005442	Cic	7	+	25267704	25294159	capicua transcriptional repressor [Source:MGI Symbol;Acc:MGI:1918972]	protein_coding	3.60749	0.904756	2.41567	0.852114	17.2442	2.32545	1.64502	7.19275	2.60303	4.90715	5.563	6.40604	15.6696	90.3276	65.4558	3.07363	1.28046	5.48474
ENSMUSG00000005447	Pafah1b3	7	-	25295049	25297986	platelet-activating factor acetylhydrolase, isoform 1b, subunit 3 [Source:MGI Symbol;Acc:MGI:108414]	protein_coding	4.26013	14.1911	0.120943	1.19487	9.74954	5.38435	11.3687	3.21919	4.6066	1.55166	4.82727	12.2494	4.14109	-0.112152	3.31184	1.42268	3.977	32.1374
ENSMUSG00000005465	Il27ra	8	-	84030294	84042589	interleukin 27 receptor, alpha [Source:MGI Symbol;Acc:MGI:1355318]	protein_coding	26.9149	4.86351	0.380603	32.9262	4.45643	11.7066	11.2662	2.61418	1.11032	1.74738	2.86597	8.14119	0.103079	1.81143	0.314097	1.73007	0.983116	22.0243
ENSMUSG00000005469	Prkaca	8	+	83972993	83996443	protein kinase, cAMP dependent, catalytic, alpha [Source:MGI Symbol;Acc:MGI:97592]	protein_coding	2.30683	0.276961	2.20267	1.12218	5.09363	1.9085	2.30368	0.425036	2.34441	2.66216	6.78872	3.53616	1.08207	4.47321	20.2487	0.295162	2.22505	-0.360638
ENSMUSG00000005470	Asf1b	8	+	83955507	83970197	anti-silencing function 1B histone chaperone [Source:MGI Symbol;Acc:MGI:1914179]	protein_coding	33.0247	18.6802	11.0057	18.4358	8.75647	746.831	57.0581	26.6184	333.845	1.57852	2.44096	20.1552	152.262	61.017	65.0841	26.9226	1.02064	139.883
ENSMUSG00000005474	Myl10	5	+	136693146	136701094	myosin, light chain 10, regulatory [Source:MGI Symbol;Acc:MGI:1891705]	protein_coding	0.0876326	-0.0280282	-0.0540588	0.100681	1.07063	0.111446	0.0695693	-0.170678	0.127374	1.42919	0.928875	3.24458	0.00660983	-0.00482056	-0.00175433	-0.175132	0.106891	0.0952438
ENSMUSG00000005481	Ddx39	8	+	83715177	83726892	DEAD (Asp-Glu-Ala-Asp) box polypeptide 39 [Source:MGI Symbol;Acc:MGI:1915528]	protein_coding	3.19238	1.7731	5.14882	408.336	34.8134	20.3513	33.879	9.70289	3.44946	82.5767	10.5322	12.4634	6.76738	61.5833	37.0041	14.9085	7.79193	-0.489285
ENSMUSG00000005483	Dnajb1	8	+	83608193	83612653	DnaJ heat shock protein family (Hsp40) member B1 [Source:MGI Symbol;Acc:MGI:1931874]	protein_coding	56.5247	22.6468	36.553	0.713919	12.2899	7.29825	11.1487	3.19646	5.97191	9.31072	11.8583	10.4343	18.2192	22.1286	9.64997	59.1007	29.2004	3.7223
ENSMUSG00000005493	Msh4	3	-	153857149	153906138	mutS homolog 4 [Source:MGI Symbol;Acc:MGI:1860077]	protein_coding	0.475476	-0.0394099	1.25735	0.745908	0.270552	0.784756	0.118653	-0.409944	0.606576	2.13854	4.00968	3.8541	0.366348	0.0439369	-0.00633919	0.736464	0.404253	0.308706
ENSMUSG00000005501	Usp40	1	-	87945119	88008551	ubiquitin specific peptidase 40 [Source:MGI Symbol;Acc:MGI:2443184]	protein_coding	2.5815	3.40897	3.55899	1.53008	2.91253	2.51451	0.515833	1.72944	1.16538	17.6176	12.5076	8.40373	15.604	2.60505	1.66167	2.09713	1.5173	1.26828
ENSMUSG00000005503	Evx1	6	+	52313498	52318378	even-skipped homeobox 1 [Source:MGI Symbol;Acc:MGI:95461]	protein_coding	0.498188	-0.00157441	1.12924	0.817845	0.604928	0.723072	-0.0117998	0.85527	0.850291	3.54188	2.93349	2.97077	0.032734	-0.0260346	-0.00581317	-0.260431	0.513137	0.110405
ENSMUSG00000005505	Kbtbd4	2	+	90904740	90911626	kelch repeat and BTB (POZ) domain containing 4 [Source:MGI Symbol;Acc:MGI:1914386]	protein_coding	0.957239	0.131168	1.12346	0.239437	2.69077	1.19663	-0.282522	0.0128296	0.856816	2.02747	3.36792	5.85948	0.339596	1.38891	0.206533	0.0837473	0.364256	1.71102
ENSMUSG00000005506	Celf1	2	+	90940382	91019497	CUGBP, Elav-like family member 1 [Source:MGI Symbol;Acc:MGI:1342295]	protein_coding	2.64236	2.4399	21.6201	2.6075	6.3046	6.92105	11.9028	2.42163	80.4516	46.1558	2.77295	75.0652	7.1007	13.136	23.6722	312.371	174.306	12.4216
ENSMUSG00000005510	Ndufs3	2	-	90894634	90904827	NADH:ubiquinone oxidoreductase core subunit S3 [Source:MGI Symbol;Acc:MGI:1915599]	protein_coding	3.65306	28.7196	17.012	35.8522	13.5314	28.4217	73.8175	33.6864	90.071	4.39822	11.1246	34.1645	125.363	29.5032	46.7884	19.1639	1058.83	119.22
ENSMUSG00000005514	Por	5	+	135670033	135735326	P450 (cytochrome) oxidoreductase [Source:MGI Symbol;Acc:MGI:97744]	protein_coding	2.32219	0.16041	2.75767	2.11714	4.15214	4.40664	15.9927	1.3216	2.64189	11.3345	12.6787	10.2312	15.4087	4.80155	6.31987	2.70286	3.82074	-0.324807
ENSMUSG00000005533	Igf1r	7	+	67952827	68233668	insulin-like growth factor I receptor [Source:MGI Symbol;Acc:MGI:96433]	protein_coding	38.3874	16.8387	5.64441	58.5136	86.3987	26.383	1.22052	3.45595	1.24775	13.9966	6.28805	8.24141	4.92003	2.82566	5.39246	3.55471	0.800422	31.3488
ENSMUSG00000005534	Insr	8	-	3122061	3279617	insulin receptor [Source:MGI Symbol;Acc:MGI:96575]	protein_coding	4.84953	4.95506	3.33754	14.4044	2.40218	1.1419	1.61736	1.52437	0.217091	5.64142	4.36578	3.48238	2.32371	2.71786	4.24273	3.66633	0.277871	1.89349
ENSMUSG00000005540	Fcer2a	8	-	3681737	3694175	Fc receptor, IgE, low affinity II, alpha polypeptide [Source:MGI Symbol;Acc:MGI:95497]	protein_coding	1.43084	0.135308	-0.19186	1.16105	0.433316	2.16112	20.2785	0.682099	0.613739	3.22516	1.77847	6.91083	0.0501716	2.10667	0.0091924	0.154103	0.617841	-0.274797
ENSMUSG00000005547	Cyp2a5	7	+	26835305	26843548	cytochrome P450, family 2, subfamily a, polypeptide 5 [Source:MGI Symbol;Acc:MGI:88597]	protein_coding	0.112864	-0.0438383	-0.0602189	0.324821	0.13709	0.727484	0.112991	0.141493	0.177298	1.73168	1.14309	2.83462	0.00838936	-0.00593411	-0.00239969	-0.247992	0.194893	0.154163
ENSMUSG00000005553	Atp4a	7	+	30712209	30725534	ATPase, H+/K+ exchanging, gastric, alpha polypeptide [Source:MGI Symbol;Acc:MGI:88113]	protein_coding	0.181595	-0.0336628	0.477835	0.371465	0.689882	0.829781	0.0816057	0.600558	0.418028	1.09372	1.42978	1.81249	0.0132568	-0.0100615	-0.00305259	-0.24402	0.321285	0.324121
ENSMUSG00000005566	Trim28	7	+	12999114	13031035	tripartite motif-containing 28 [Source:MGI Symbol;Acc:MGI:109274]	protein_coding	0.475661	22.3729	8.71807	5.42954	9.35417	48.9657	0.517223	5.84526	381.01	46.7971	4.31895	7.04136	78.5729	56.296	44.5056	14.627	1.70744	54.3901
ENSMUSG00000005575	Ube2m	7	-	13035120	13038275	ubiquitin-conjugating enzyme E2M [Source:MGI Symbol;Acc:MGI:108278]	protein_coding	30.9649	7.7866	14.0666	52.1903	16.1115	6.77166	0.0838816	10.5634	1.02507	11.0414	11.8902	7.74637	56.2406	35.4686	20.0252	3.00522	3.07978	11.2853
ENSMUSG00000005580	Adcy9	16	-	4287529	4420498	adenylate cyclase 9 [Source:MGI Symbol;Acc:MGI:108450]	protein_coding	0.156198	-0.117186	0.528776	0.780036	0.568616	0.351607	0.354706	0.0176561	0.538437	2.67323	2.83283	2.6063	0.348463	0.761181	0.372478	1.09874	0.618005	0.489057
ENSMUSG00000005583	Mef2c	13	+	83504034	83667080	myocyte enhancer factor 2C [Source:MGI Symbol;Acc:MGI:99458]	protein_coding	10.6392	10.4457	12.9292	5.07546	31.0504	4.70468	18.289	4.17952	32.6584	10.2297	26.9918	11.8055	7.54029	10.1152	8.07635	9.63358	0.528044	4.16928
ENSMUSG00000005609	Ctr9	7	+	111028951	111056377	CTR9 homolog, Paf1/RNA polymerase II complex component [Source:MGI Symbol;Acc:MGI:109345]	protein_coding	13.3449	8.94466	5.77856	20.9924	6.15449	2.11153	0.13072	1.87427	0.528754	3.67024	5.23581	7.03426	36.9963	16.4879	18.0567	3.91773	1.36399	15.4553
ENSMUSG00000005610	Eif4g2	7	-	111067750	111083030	eukaryotic translation initiation factor 4, gamma 2 [Source:MGI Symbol;Acc:MGI:109207]	protein_coding	91.0889	18.8698	27.0632	26.8003	24.3144	18.5308	9.74752	24.2393	7.3163	36.3309	10.3433	25.5833	111.971	84.413	98.0767	58.1037	2.70898	26.9346
ENSMUSG00000005611	Mrvi1	7	-	110868266	110982461	MRV integration site 1 [Source:MGI Symbol;Acc:MGI:1338023]	protein_coding	1.77386	1.35768	0.573526	6.28826	51.4149	11.4796	0.216462	0.426405	0.302065	3.0136	1.88698	3.41026	0.00555091	-0.00292859	0.0337011	-0.345282	0.206844	0.346904
ENSMUSG00000005615	Pcyt1a	16	+	32430921	32475070	phosphate cytidylyltransferase 1, choline, alpha isoform [Source:MGI Symbol;Acc:MGI:88557]	protein_coding	2.14166	9.53643	4.81148	2.1864	3.3722	3.01089	18.5176	3.9269	4.75021	27.836	11.711	9.73694	15.1199	1.22782	2.90938	3.2338	2.63073	0.0495188
ENSMUSG00000005621	Zfp592	7	+	80993681	81045164	zinc finger protein 592 [Source:MGI Symbol;Acc:MGI:2443541]	protein_coding	1.24716	2.2526	0.185198	0.672637	1.28697	1.08915	11.1405	0.96251	1.28731	1.69215	2.00122	3.03568	1.20206	2.63179	10.1236	1.68513	1.0069	0.879094
ENSMUSG00000005625	Psmd4	3	-	95032694	95042614	proteasome (prosome, macropain) 26S subunit, non-ATPase, 4 [Source:MGI Symbol;Acc:MGI:1201670]	protein_coding	3.63271	19.3621	8.13983	102.434	58.7274	6.11692	39.0624	93.5808	8.46302	172.131	21.9826	10.9193	80.5153	57.7556	59.6298	22.5187	11.4245	1.09676
ENSMUSG00000005628	Tmod4	3	+	95124476	95129209	tropomodulin 4 [Source:MGI Symbol;Acc:MGI:1355285]	protein_coding	0.246966	2.06292	0.576876	0.678718	0.206825	1.52767	0.168301	0.37365	0.356001	4.14038	4.57403	5.47818	0.151276	-0.0128107	-0.00443834	-0.372781	0.289989	0.301586
ENSMUSG00000005640	Insrr	3	+	87796951	87816101	insulin receptor-related receptor [Source:MGI Symbol;Acc:MGI:1346037]	protein_coding	2.42658	-0.100461	1.80578	0.625049	1.00567	0.595569	0.486774	0.36388	0.500754	2.65893	3.20499	2.42861	0.0131611	-0.00856232	-0.0044661	1.49392	2.27523	0.519579
ENSMUSG00000005649	Cabp5	7	+	13398132	13408887	calcium binding protein 5 [Source:MGI Symbol;Acc:MGI:1352746]	protein_coding	0.091297	1.79945	-0.0225943	0.423985	0.0924153	0.451895	0.169593	0.613424	0.182433	1.6118	1.82032	0.775731	0.00674392	-0.00420923	-0.00250004	-0.303517	0.168353	0.228898
ENSMUSG00000005656	Snx6	12	-	54746349	54795703	sorting nexin 6 [Source:MGI Symbol;Acc:MGI:1919433]	protein_coding	26.115	78.8299	17.0561	215.992	15.5273	38.2999	144.8	174.025	26.1019	100.531	17.13	7.0171	25.5454	13.5234	71.56	178.763	12.019	12.7974
ENSMUSG00000005667	Mthfd2	6	-	83305691	83325908	methylenetetrahydrofolate dehydrogenase (NAD+ dependent), methenyltetrahydrofolate cyclohydrolase [Source:MGI Symbol;Acc:MGI:1338850]	protein_coding	61.0718	25.1715	26.4993	1.76433	15.2	4.4891	1.11872	1.33896	0.856216	14.0053	8.31169	9.57017	28.0502	17.7219	11.897	3.97734	4.60242	1.35958
ENSMUSG00000005672	Kit	5	+	75574916	75656722	KIT proto-oncogene receptor tyrosine kinase [Source:MGI Symbol;Acc:MGI:96677]	protein_coding	7.74478	8.2021	5.01506	1.7312	4.85228	5.73706	-0.0590176	2.81399	1.64124	7.67913	5.10201	7.42088	11.6886	10.6698	5.20061	6.66543	1.28452	19.6447
ENSMUSG00000005674	Tomm40l	1	-	171216011	171222514	translocase of outer mitochondrial membrane 40-like [Source:MGI Symbol;Acc:MGI:3589112]	protein_coding	0.427261	0.0430235	1.21681	0.601876	1.98948	3.5132	-0.0659734	0.852676	0.605855	2.40867	2.79387	2.39132	0.0289182	16.1825	-0.00427861	-0.0624205	0.553839	-0.124737
ENSMUSG00000005677	Nr1i3	1	+	171213970	171220701	nuclear receptor subfamily 1, group I, member 3 [Source:MGI Symbol;Acc:MGI:1346307]	protein_coding	0.364846	1.1181	0.986727	0.440156	0.0214694	0.759772	0.0529653	-0.181049	0.324068	0.333985	1.464	1.81117	0.0252032	0.128661	-0.00391716	-0.0936509	0.204217	-0.0837798
ENSMUSG00000005681	Apoa2	1	+	171225054	171226379	apolipoprotein A-II [Source:MGI Symbol;Acc:MGI:88050]	protein_coding	0.00680742	-0.152375	0.17179	0.65398	0.208771	0.488363	0.50668	7.28457	0.233341	2.63281	2.02061	2.62504	-7.70873e-05	0.00338269	-0.00329446	1.76003	2.64143	0.694639
ENSMUSG00000005682	Pan2	10	+	128303335	128321358	PAN2 poly(A) specific ribonuclease subunit [Source:MGI Symbol;Acc:MGI:1918984]	protein_coding	9.57139	4.12971	8.70558	0.690865	2.15329	2.18565	2.40205	0.9489	15.9517	5.11687	5.00139	6.43886	3.02249	3.6154	6.5367	1.76086	0.272041	1.57482
ENSMUSG00000005683	Cs	10	+	128337734	128362479	citrate synthase [Source:MGI Symbol;Acc:MGI:88529]	protein_coding	18.2523	12.7524	25.5145	6.35186	12.215	8.19837	25.2829	4.11241	1.91395	5.63194	10.1815	15.4011	37.0779	47.1449	38.4147	7.27117	3.61207	3.79503
ENSMUSG00000005686	Ampd3	7	+	110768206	110812405	adenosine monophosphate deaminase 3 [Source:MGI Symbol;Acc:MGI:1096344]	protein_coding	7.82549	0.646294	0.0873734	0.723411	1.79899	1.32308	13.1464	2.10826	1.17831	2.0995	3.59254	5.34716	1.95327	8.17212	0.819861	2.7086	0.634364	8.16563
ENSMUSG00000005687	Bcas2	3	+	103171655	103179166	breast carcinoma amplified sequence 2 [Source:MGI Symbol;Acc:MGI:1915433]	protein_coding	6.46047	237.079	12.9953	66.075	25.7802	44.4439	28.0418	12.7532	9.75869	4.78973	9.11471	14.8651	232.63	102.741	146.87	52.0251	5.6909	9.13496
ENSMUSG00000005696	Sh2d1a	X	+	42502453	42529330	SH2 domain containing 1A [Source:MGI Symbol;Acc:MGI:1328352]	protein_coding	57.4842	4.12	0.0719876	1.24547	9.60374	121.084	55.8575	289.687	3.09453	109.667	6.34879	8.9274	101.258	52.6813	138.084	6.874	3.03641	104.556
ENSMUSG00000005698	Ctcf	8	+	105636568	105682922	CCCTC-binding factor [Source:MGI Symbol;Acc:MGI:109447]	protein_coding	9.86895	11.0869	9.61552	4.23647	7.63754	32.1096	5.77591	8.39169	0.814421	6.98255	5.65671	8.71344	18.9847	31.5654	43.3447	8.06283	564.567	8.45042
ENSMUSG00000005699	Pard6a	8	+	105701148	105703496	par-6 family cell polarity regulator alpha [Source:MGI Symbol;Acc:MGI:1927223]	protein_coding	2.8938	0.433598	0.788123	2.05604	3.57131	2.6467	-0.611993	2.07866	2.2516	1.62224	8.63114	8.32618	0.975347	0.0436343	-0.0124465	0.962569	2.13213	45.9717
ENSMUSG00000005705	Agrp	8	-	105566698	105637393	agouti related neuropeptide [Source:MGI Symbol;Acc:MGI:892013]	protein_coding	0.29014	0.0285926	1.05494	0.117035	0.092596	1.72301	-0.0767825	-0.133512	0.909691	2.45198	2.20584	1.0496	0.0206163	-0.0171493	-0.00310379	-0.0537684	0.155322	0.165401
ENSMUSG00000005716	Pvalb	15	-	78191114	78206400	parvalbumin [Source:MGI Symbol;Acc:MGI:97821]	protein_coding	0.300055	-0.0396894	-0.199011	0.250516	0.0950144	7.74272	0.43599	-0.333339	0.37058	3.46741	6.18319	4.18868	0.0209771	-0.0160803	-0.0045388	-0.314925	0.28166	0.696213
ENSMUSG00000005718	Tfap4	16	-	4544661	4559854	transcription factor AP4 [Source:MGI Symbol;Acc:MGI:103239]	protein_coding	6.64251	-0.0685866	3.56144	1.04073	2.94756	25.5784	0.419773	0.415701	0.320744	2.56353	4.62798	2.4269	10.1311	-0.0106352	8.62211	1.42156	0.425242	0.255221
ENSMUSG00000005732	Ranbp1	16	-	18239784	18248732	RAN binding protein 1 [Source:MGI Symbol;Acc:MGI:96269]	protein_coding	177.134	247.96	91.8555	40.1634	366.24	80.6368	98.6582	143.725	990.291	267.03	29.4087	55.0424	182.197	245.563	185.423	256.809	6.62683	76.1361
ENSMUSG00000005763	Cd247	1	+	165788681	165877277	CD247 antigen [Source:MGI Symbol;Acc:MGI:88334]	protein_coding	7.66712	15.0073	3.78227	0.526089	14.2485	15.7235	3.84424	8.4877	0.707557	73.2578	3.62088	17.2523	4.21217	4.59478	32.952	11.0734	0.817551	3.13203
ENSMUSG00000005774	Rfx5	3	+	94954075	94961561	regulatory factor X, 5 (influences HLA class II expression) [Source:MGI Symbol;Acc:MGI:1858421]	protein_coding	0.89972	0.916889	0.279932	0.826898	0.868915	2.14436	8.58072	2.00476	1.16552	2.82964	3.37817	5.1055	0.0786241	0.761546	6.50214	0.148389	0.63573	0.183379
ENSMUSG00000005779	Psmb4	3	-	94884093	94886961	proteasome (prosome, macropain) subunit, beta type 4 [Source:MGI Symbol;Acc:MGI:1098257]	protein_coding	16.8901	18.0781	5.40103	35.3096	18.6516	30.7812	9.8311	452.013	7.20977	36.1088	271.131	10.3482	382.16	251.171	232.125	43.65	15.0733	114.537
ENSMUSG00000005800	Mmp8	9	+	7558456	7568485	matrix metallopeptidase 8 [Source:MGI Symbol;Acc:MGI:1202395]	protein_coding	10.9342	0.723842	8.29984	3.73501	8.65839	6.54293	257.646	192.436	373.814	4.3885	14.1214	2.07697	59.2579	48.3494	33.8413	3.44919	3.33408	0.724732
ENSMUSG00000005802	Slc30a4	2	-	122681233	122702663	solute carrier family 30 (zinc transporter), member 4 [Source:MGI Symbol;Acc:MGI:1345282]	protein_coding	23.4442	11.1249	17.7264	5.38827	1.52084	0.179008	0.973208	0.906746	0.662177	4.45517	22.8748	8.61604	0.200645	3.42191	1.10415	6.75279	1.13176	4.05637
ENSMUSG00000005803	Sqor	2	+	122765237	122809569	sulfide quinone oxidoreductase [Source:MGI Symbol;Acc:MGI:1929899]	protein_coding	23.5245	7.78239	0.868848	2.10257	4.36761	24.5526	53.1609	33.4283	3.18465	6.39219	10.5217	8.42076	59.2384	42.3617	67.2419	1.36063	3.81997	9.13422
ENSMUSG00000005804	Bloc1s6	2	+	122738503	122749475	biogenesis of lysosomal organelles complex-1, subunit 6, pallidin [Source:MGI Symbol;Acc:MGI:1927580]	protein_coding	1.4169	0.177853	1.08245	7.26803	50.0602	20.1069	18.4816	1.58989	16.8873	10.2106	4.28141	7.44832	32.5478	14.3184	9.80782	3.96396	0.524807	4.08353
ENSMUSG00000005813	Metap1	3	-	138458956	138489515	methionyl aminopeptidase 1 [Source:MGI Symbol;Acc:MGI:1922874]	protein_coding	12.2504	7.36184	1.39728	5.80479	3.91556	2.63768	20.5415	2.13698	2.0517	4.19851	8.1084	10.2935	7.71553	10.3499	22.0475	5.55981	2.12443	11.8825
ENSMUSG00000005823	Gpr108	17	-	57234635	57248446	G protein-coupled receptor 108 [Source:MGI Symbol;Acc:MGI:1925558]	protein_coding	1.36931	1.82694	3.70872	1.80837	4.89168	31.5473	0.373781	0.336905	3.95285	4.86133	5.49235	4.25348	2.0123	11.362	16.6784	1.51062	2.01431	0.335193
ENSMUSG00000005824	Tnfsf14	17	-	57189492	57194177	tumor necrosis factor (ligand) superfamily, member 14 [Source:MGI Symbol;Acc:MGI:1355317]	protein_coding	2.39496	0.211013	0.21839	33.4298	17.3166	21.8533	6.23469	12.3751	0.651485	51.5269	2.8084	2.31532	0.118745	0.427537	-0.00699814	2.27912	0.958206	0.759398
ENSMUSG00000005836	Gata6	18	+	11052064	11085635	GATA binding protein 6 [Source:MGI Symbol;Acc:MGI:107516]	protein_coding	0.284341	2.70268	2.80914	1.5368	2.62667	0.986501	0.640357	0.138431	1.04515	3.2286	4.24006	4.77458	0.700706	0.384719	0.290884	2.79799	2.07008	0.659469
ENSMUSG00000005846	Rsl1d1	16	-	11192970	11203331	ribosomal L1 domain containing 1 [Source:MGI Symbol;Acc:MGI:1913659]	protein_coding	25.3805	12.264	8.37272	35.1488	27.7008	25.5074	50.1434	11.6274	2.63315	4.01225	8.03365	24.26	42.0922	50.949	30.6073	28.2449	4.32644	25.4368
ENSMUSG00000005864	Cnga2	X	+	71991849	72010218	cyclic nucleotide gated channel alpha 2 [Source:MGI Symbol;Acc:MGI:108040]	protein_coding	2.6765	0.299676	0.929652	0.154003	0.189992	0.0739733	0.747615	-0.116266	-0.162115	1.08731	2.26253	0.385644	-0.0351853	0.0343182	0.0381117	2.93626	-0.00656418	1.00246
ENSMUSG00000005871	Apc	18	+	34220924	34322552	APC, WNT signaling pathway regulator [Source:MGI Symbol;Acc:MGI:88039]	protein_coding	11.5732	12.9791	0.497527	16.3608	1.06666	2.22778	2.64933	1.57759	0.921133	5.3642	6.68942	11.3858	3.95475	4.45626	4.84805	4.3094	0.441055	42.3573
ENSMUSG00000005873	Reep5	18	-	34344885	34374070	receptor accessory protein 5 [Source:MGI Symbol;Acc:MGI:1270152]	protein_coding	3.05873	9.38849	2.68026	9.46331	8.89861	7.44865	15.9223	3.16467	2.10134	6.333	12.2004	11.8601	34.5179	55.4805	49.0528	0.603121	1.61419	-0.127066
ENSMUSG00000005881	Ergic3	2	+	156008045	156018279	ERGIC and golgi 3 [Source:MGI Symbol;Acc:MGI:1913616]	protein_coding	3.69604	0.480986	4.40097	101.193	8.77544	5.67432	73.6565	11.8564	3.18267	6.09322	15.6187	15.2245	12.0727	102.98	64.4856	0.989906	7.6936	-0.712886
ENSMUSG00000005882	Uqcc1	2	-	155846894	155930310	ubiquinol-cytochrome c reductase complex assembly factor 1 [Source:MGI Symbol;Acc:MGI:1929472]	protein_coding	3.93529	2.05051	7.81395	0.79372	14.9835	6.06693	0.0106357	3.78963	0.415778	4.68984	5.18475	10.933	4.1414	6.26281	0.874752	2.7078	0.561522	0.0230248
ENSMUSG00000005883	Spo11	2	+	172977700	172993576	SPO11 meiotic protein covalently bound to DSB [Source:MGI Symbol;Acc:MGI:1349669]	protein_coding	0.130598	2.83314	1.01844	0.772191	0.374888	0.0273307	0.371898	0.109092	0.327057	2.0808	2.93646	2.11662	0.533482	0.114213	0.268561	0.99198	0.315204	0.511592
ENSMUSG00000005886	Ncoa2	1	-	13139105	13374083	nuclear receptor coactivator 2 [Source:MGI Symbol;Acc:MGI:1276533]	protein_coding	6.06572	16.2789	3.07893	17.7982	8.65752	13.1422	11.5978	3.56991	1.82772	10.5082	7.12411	8.8572	25.9098	9.12621	7.53813	3.92163	2.19399	3.61165
ENSMUSG00000005891	Prl4a1	13	+	28016212	28023559	prolactin family 4, subfamily a, member 1 [Source:MGI Symbol;Acc:MGI:1206587]	protein_coding	0.724126	0.0619627	3.81098	0.425243	0.0243475	0.148907	-0.156693	-0.264367	0.780757	1.06386	1.80951	1.90584	0.0445998	-0.0363082	-0.00662806	-0.112124	0.361992	-0.173062
ENSMUSG00000005892	Trh	6	-	92242061	92244650	thyrotropin releasing hormone [Source:MGI Symbol;Acc:MGI:98823]	protein_coding	0.134154	4.17024	0.215693	0.355494	0.0924154	0.321266	0.151312	-0.00732626	0.2208	1.48535	1.04137	2.17089	0.00986073	-0.00684437	-0.00294019	-0.304572	0.191614	0.614856
ENSMUSG00000005893	Nr2c2	6	+	92091390	92174294	nuclear receptor subfamily 2, group C, member 2 [Source:MGI Symbol;Acc:MGI:1352466]	protein_coding	8.71821	8.09615	7.03068	4.61828	8.12237	3.94842	14.6378	6.82448	-0.176924	12.5621	5.70483	8.74232	2.54959	9.68293	16.6822	5.40682	84.8664	0.443563
ENSMUSG00000005897	Nr2c1	10	+	94148023	94197211	nuclear receptor subfamily 2, group C, member 1 [Source:MGI Symbol;Acc:MGI:1352465]	protein_coding	4.00323	4.68374	2.04088	3.52464	1.77587	38.4697	0.674688	0.697087	0.599615	5.20678	2.32763	1.71934	0.5834	2.64128	0.346205	-0.114853	0.719461	0.95144
ENSMUSG00000005899	Smpd4	16	+	17619354	17644828	sphingomyelin phosphodiesterase 4 [Source:MGI Symbol;Acc:MGI:1924876]	protein_coding	10.7676	6.29656	5.30101	1.86182	2.64145	2.14411	0.790198	1.89092	0.722314	6.84422	9.32101	7.75486	0.573875	4.75636	6.41552	1.13268	0.819353	1.37888
ENSMUSG00000005907	Pex1	5	+	3596066	3637232	peroxisomal biogenesis factor 1 [Source:MGI Symbol;Acc:MGI:1918632]	protein_coding	19.0606	0.748771	11.0061	2.35899	3.80913	3.80442	0.304173	4.73761	2.19912	38.4169	6.07008	9.59617	3.30138	14.8846	2.42329	1.54104	1.60216	3.55965
ENSMUSG00000005917	Otx1	11	-	21994764	22002897	orthodenticle homeobox 1 [Source:MGI Symbol;Acc:MGI:97450]	protein_coding	0.0278027	1.79628	0.105485	0.429571	0.444582	0.250258	0.371341	0.158751	0.235431	1.25726	3.34413	3.15978	0.00170964	0.00115991	-0.0028633	-0.193666	0.404717	0.544095
ENSMUSG00000005936	Kctd20	17	+	28951950	28969549	potassium channel tetramerisation domain containing 20 [Source:MGI Symbol;Acc:MGI:1914239]	protein_coding	14.2588	5.4751	4.56852	2.31168	6.94282	2.21776	25.8258	39.1679	2.14713	7.50529	8.8422	4.10977	40.6928	41.7777	33.1958	2.49742	3.13273	0.427302
ENSMUSG00000005947	Itgae	11	+	73090583	73147446	integrin alpha E, epithelial-associated [Source:MGI Symbol;Acc:MGI:1298377]	protein_coding	1.68783	1.11656	7.0387	1.02904	1.45176	0.213175	-0.115313	-0.16914	2.00284	2.21052	3.78562	2.21698	0.632718	0.0162497	0.0851133	1.534	0.951216	-0.0475948
ENSMUSG00000005949	Ctns	11	-	73183596	73199042	cystinosis, nephropathic [Source:MGI Symbol;Acc:MGI:1932872]	protein_coding	1.00482	0.0461303	3.78876	0.557632	2.63893	2.43786	-0.12981	0.122173	1.08407	4.94746	4.81185	2.78317	33.0176	13.4735	10.2958	0.379826	0.552368	-0.132038
ENSMUSG00000005950	P2rx5	11	+	73160421	73172685	purinergic receptor P2X, ligand-gated ion channel, 5 [Source:MGI Symbol;Acc:MGI:2137026]	protein_coding	0.116343	-0.0624145	0.207774	0.582947	0.0965541	0.687715	0.168366	1.02532	0.383263	1.96692	3.43855	2.74494	0.00856626	-0.00568613	-0.00282342	-0.314723	0.228693	0.22873
ENSMUSG00000005951	Shpk	11	+	73199460	73224511	sedoheptulokinase [Source:MGI Symbol;Acc:MGI:1921887]	protein_coding	0.453149	0.013018	0.571947	0.673877	0.320022	0.69489	-0.0456061	1.02316	0.479182	1.31411	2.15817	2.24714	0.124165	-0.0244172	0.851388	-0.191372	0.465353	0.881763
ENSMUSG00000005952	Trpv1	11	+	73234292	73261242	transient receptor potential cation channel, subfamily V, member 1 [Source:MGI Symbol;Acc:MGI:1341787]	protein_coding	4.1904	3.43241	3.1766	0.789926	0.479141	0.5583	0.655471	0.713017	0.384917	2.63521	2.80301	2.42548	-0.0127044	0.0146146	-0.00172162	0.702327	0.194395	0.896736
ENSMUSG00000005958	Ephb3	16	+	21204755	21223305	Eph receptor B3 [Source:MGI Symbol;Acc:MGI:104770]	protein_coding	2.37104	1.61504	2.91436	0.306552	0.450758	1.15301	0.564934	1.19607	-0.0687246	1.7992	2.82558	4.31172	-0.0311861	0.029913	0.00221081	-0.0504335	45.5692	0.895637
ENSMUSG00000005968	Tuft1	3	-	94612757	94658872	tuftelin 1 [Source:MGI Symbol;Acc:MGI:109572]	protein_coding	0.466641	1.28372	0.744783	0.534609	0.631508	0.223666	-0.0318509	-0.292884	0.548035	3.69616	1.95001	3.41503	0.0310171	0.13414	-0.00534394	-0.218443	0.538109	0.052746
ENSMUSG00000005973	Rcn1	2	-	105386291	105399319	reticulocalbin 1 [Source:MGI Symbol;Acc:MGI:104559]	protein_coding	3.02246	0.299582	0.655595	1.41663	5.28553	21.5374	9.31916	1.4343	2.61602	62.0443	5.63676	4.10852	0.906884	8.52616	5.80124	2.80041	2.85541	0.502649
ENSMUSG00000005980	Dnase1	16	+	4036942	4040024	deoxyribonuclease I [Source:MGI Symbol;Acc:MGI:103157]	protein_coding	0.329039	-0.0433479	0.887869	0.448284	0.477647	0.456916	0.160064	-0.356659	0.408085	1.90512	1.24524	1.54181	0.0693467	-0.0174102	-0.00492722	1.60426	0.309441	0.235428
ENSMUSG00000005981	Trap1	16	-	4039971	4077827	TNF receptor-associated protein 1 [Source:MGI Symbol;Acc:MGI:1915265]	protein_coding	0.997833	3.84289	4.57333	53.4812	5.98063	4.05164	0.211112	2.04517	0.706232	3.70353	39.7498	4.75635	12.175	19.0064	5.36261	1.90214	2.47842	0.171505
ENSMUSG00000005982	Naa60	16	+	3872375	3904770	N(alpha)-acetyltransferase 60, NatF catalytic subunit [Source:MGI Symbol;Acc:MGI:1922013]	protein_coding	2.16989	3.06461	1.89836	16.95	5.13994	11.2189	-0.105684	2.89865	2.29331	6.17773	4.00089	16.8422	0.253712	-0.0774658	27.327	0.231361	1.61414	11.6677
ENSMUSG00000005983	1700037C18Rik	16	-	3895179	3908689	RIKEN cDNA 1700037C18 gene [Source:MGI Symbol;Acc:MGI:1920511]	protein_coding	0.376379	0.029817	1.1463	25.7486	0.240294	1.08179	-0.0818255	-0.18278	0.33271	2.85605	1.97947	10.991	18.4744	22.7856	9.65619	-0.0923478	0.208752	-0.011506
ENSMUSG00000005986	Ankrd13d	19	-	4270180	4283137	ankyrin repeat domain 13 family, member D [Source:MGI Symbol;Acc:MGI:1915673]	protein_coding	0.62008	0.00602839	0.763055	0.697811	0.885102	1.08662	-0.0331818	0.673919	0.881409	2.01241	5.0344	3.92304	0.039221	-0.0311699	3.64611	-0.276462	0.827527	0.103487
ENSMUSG00000005994	Tyrp1	4	+	80834123	80851719	tyrosinase-related protein 1 [Source:MGI Symbol;Acc:MGI:98881]	protein_coding	0.190277	6.05827	0.359	0.525463	0.121542	0.873252	0.195327	0.0415693	0.307176	2.24444	2.20615	3.42147	0.013695	-0.00961051	-0.00393732	-0.37611	0.262426	0.410236
ENSMUSG00000006005	Tpr	1	+	150392838	150449935	translocated promoter region, nuclear basket protein [Source:MGI Symbol;Acc:MGI:1922066]	protein_coding	8.36567	28.1828	9.61291	12.0391	37.2669	26.7337	24.8308	102.159	21.2232	21.7079	6.60495	12.3962	32.1933	22.8073	9.53835	8.47875	38.2716	41.6236
ENSMUSG00000006007	Pdc	1	+	150319417	150333906	phosducin [Source:MGI Symbol;Acc:MGI:98090]	protein_coding	2.5648	1.90019	1.26485	0.50462	0.687021	1.25498	0.678516	0.849275	0.162208	4.4524	1.11199	0.925984	0.0238112	0.0757609	0.0383711	0.977197	0.330052	0.987662
ENSMUSG00000006010	Odr4	1	-	150361305	150393080	odr4 GPCR localization factor homolog [Source:MGI Symbol;Acc:MGI:2385108]	protein_coding	8.78033	9.74471	8.81375	42.3037	14.3544	3.27699	0.909502	4.27324	0.473764	195.116	5.77989	9.21747	6.14873	1.40166	4.40416	7.49286	1.3191	0.848071
ENSMUSG00000006014	Prg4	1	-	150449412	150466165	proteoglycan 4 (megakaryocyte stimulating factor, articular superficial zone protein) [Source:MGI Symbol;Acc:MGI:1891344]	protein_coding	2.13417	1.08416	0.955574	1.16232	0.855505	0.938114	0.234072	0.435338	-0.03269	1.8683	1.93444	2.4052	0.0492086	0.722765	0.000307933	-0.248035	0.576366	0.426639
ENSMUSG00000006019	Dhx34	7	-	16197147	16222037	DEAH (Asp-Glu-Ala-His) box polypeptide 34 [Source:MGI Symbol;Acc:MGI:1918973]	protein_coding	0.434088	2.39363	0.630022	0.68803	0.617336	0.512644	0.196267	0.662332	0.710881	1.88466	2.74766	2.60039	4.73379	-0.0215234	4.65207	0.284647	0.970874	0.384462
ENSMUSG00000006021	Kptn	7	+	16119895	16127516	kaptin [Source:MGI Symbol;Acc:MGI:1890380]	protein_coding	1.44624	0.15565	1.49803	13.212	3.72152	2.45493	14.6557	2.59909	1.26006	7.35105	4.62356	7.05903	10.0142	6.22381	22.4389	8.91786	0.555314	-0.367843
ENSMUSG00000006024	Napa	7	+	16098458	16117975	N-ethylmaleimide sensitive fusion protein attachment protein alpha [Source:MGI Symbol;Acc:MGI:104563]	protein_coding	35.0966	0.316135	4.34903	33.2524	18.6565	6.17401	13.3064	85.2517	5.02314	8.82428	13.6186	10.4746	10.0834	16.8397	17.2056	8.099	8.18618	29.4584
ENSMUSG00000006050	Sra1	18	-	36666681	36670815	steroid receptor RNA activator 1 [Source:MGI Symbol;Acc:MGI:1344414]	protein_coding	2.98787	24.663	6.11569	85.9416	7.2841	8.71136	-0.639778	18.1856	1.96466	43.2718	13.9291	16.9863	37.8071	21.4848	22.3981	22.521	4.13863	28.2282
ENSMUSG00000006056	Calcoco2	11	-	96099326	96111964	calcium binding and coiled-coil domain 2 [Source:MGI Symbol;Acc:MGI:1343177]	protein_coding	0.225665	-0.0282711	0.75139	0.441048	0.0695929	0.666368	0.0652531	0.078472	0.272652	1.4203	3.02407	3.03179	0.016239	-0.0125543	-0.00346878	-0.244745	0.39725	0.0965466
ENSMUSG00000006057	Atp5g1	11	-	96068852	96075670	ATP synthase, H+ transporting, mitochondrial F0 complex, subunit C1 (subunit 9) [Source:MGI Symbol;Acc:MGI:107653]	protein_coding	16.5321	12.5478	8.64952	455.256	22.0983	6.61406	20.1535	8.32213	3.45294	8.01044	5.96282	9.87112	38.9352	32.1898	54.987	8.23847	3.90201	15.1376
ENSMUSG00000006058	Snf8	11	+	96034885	96047430	SNF8, ESCRT-II complex subunit, homolog (S. cerevisiae) [Source:MGI Symbol;Acc:MGI:1343161]	protein_coding	2.7202	6.78993	3.69154	19.0239	13.6455	22.2055	5.28625	3.59114	2.87591	325.615	8.18508	6.1078	68.69	35.5863	76.5133	3.68995	2.3126	-0.377081
ENSMUSG00000006095	Tbcb	7	-	30224131	30232272	tubulin folding cofactor B [Source:MGI Symbol;Acc:MGI:1913661]	protein_coding	1.39331	0.380034	10.9889	181.665	8.5791	298.928	22.5641	5.19199	133.819	4.15186	5.8657	16.562	49.5339	28.3617	32.1679	23.064	1381.67	27.6
ENSMUSG00000006127	Inpp5k	11	+	75630988	75648871	inositol polyphosphate 5-phosphatase K [Source:MGI Symbol;Acc:MGI:1194899]	protein_coding	23.832	1.99659	4.04368	1.07846	6.42899	3.95604	66.8185	3.21007	1.13585	5.36036	6.22271	9.57063	18.707	5.43139	21.6323	1.54541	1.32241	-0.155617
ENSMUSG00000006134	Crkl	16	+	17451987	17487434	v-crk avian sarcoma virus CT10 oncogene homolog-like [Source:MGI Symbol;Acc:MGI:104686]	protein_coding	6.22172	4.114	4.63299	3.28731	14.8837	2.44998	0.132729	1.96131	0.166263	1.06936	2.96152	6.01658	15.7855	2.40737	4.63799	4.62087	0.429998	4.57935
ENSMUSG00000006143	Upk3bl	5	+	136054492	136064326	uroplakin 3B-like [Source:MGI Symbol;Acc:MGI:1916915]	protein_coding	0.173634	5.37648	-0.0314683	0.348961	0.189192	-0.0132327	0.36569	1.22515	0.752906	2.80577	2.1027	3.90491	0.0123558	-0.00747294	-0.0047677	-0.507682	0.348918	0.873011
ENSMUSG00000006154	Eps8l1	7	+	4460674	4480487	EPS8-like 1 [Source:MGI Symbol;Acc:MGI:1914675]	protein_coding	0.327097	0.932218	0.638925	1.06326	2.61252	1.19866	0.242112	1.34106	0.647195	4.32109	3.50429	6.3949	0.0224573	-0.0162366	-0.00582201	0.350625	0.869066	0.895689
ENSMUSG00000006169	Clint1	11	+	45851964	45910625	clathrin interactor 1 [Source:MGI Symbol;Acc:MGI:2144243]	protein_coding	1.77823	3.26924	5.11524	13.6308	14.3384	6.65713	50.9386	3.19855	63.0567	75.1507	3.58143	8.56625	22.0476	16.9539	40.7195	9.41473	3.06893	-0.375681
ENSMUSG00000006179	Prss16	13	-	22002173	22009742	protease, serine 16 (thymus) [Source:MGI Symbol;Acc:MGI:1859181]	protein_coding	-0.432133	-0.156156	2.60804	0.00297313	0.321445	0.622528	0.557922	0.888228	132.547	1.52361	3.38762	4.64756	0.0290558	8.605	0.0347548	1.41291	-0.0860063	0.83037
ENSMUSG00000006191	Cdkal1	13	-	29191746	29855674	CDK5 regulatory subunit associated protein 1-like 1 [Source:MGI Symbol;Acc:MGI:1921765]	protein_coding	11.4076	10.801	10.2143	3.54375	2.30733	3.59443	0.772093	2.29562	0.71174	12.1135	9.34621	180.608	2.64546	5.66591	7.26594	0.89568	0.470534	1.19687
ENSMUSG00000006200	Rhox6	X	+	37826910	37829857	reproductive homeobox 6 [Source:MGI Symbol;Acc:MGI:1202888]	protein_coding	0.0743222	-0.0328205	-0.0375939	0.101	0.051509	0.201232	0.083287	-0.175926	0.120187	1.14001	3.32599	2.74226	0.00560398	-0.00390572	-0.00167356	-0.186494	0.104835	0.112607
ENSMUSG00000006204	Cdcp3	7	+	131174402	131306451	CUB domain containing protein 3 [Source:MGI Symbol;Acc:MGI:1918645]	protein_coding	1.99229	1.97627	2.46025	0.655866	0.28822	0.790584	0.290238	0.517598	0.57458	2.75676	1.7095	1.90332	0.040396	-0.00668831	0.0124693	0.407741	0.518174	0.508312
ENSMUSG00000006205	Htra1	7	+	130936111	130985660	HtrA serine peptidase 1 [Source:MGI Symbol;Acc:MGI:1929076]	protein_coding	1.80438	0.428031	7.68256	2.74634	15.3365	1.27314	0.0113278	0.57716	1.65835	3.39954	5.69605	4.11065	0.177139	0.153787	0.0664972	4.45243	5.44421	-0.0138782
ENSMUSG00000006215	Zbtb17	4	+	141444654	141467930	zinc finger and BTB domain containing 17 [Source:MGI Symbol;Acc:MGI:107410]	protein_coding	0.629183	0.05466	2.06274	21.6944	2.57935	2.06377	-0.140232	0.823495	0.613538	2.55367	4.27418	3.08337	2.45808	3.4626	2.05888	0.657557	0.687667	0.470244
ENSMUSG00000006216	Clcnkb	4	-	141404353	141416014	chloride channel, voltage-sensitive Kb [Source:MGI Symbol;Acc:MGI:1930643]	protein_coding	1.41094	0.233844	-0.246831	0.490989	-0.0860336	0.576154	-0.426341	0.77077	1.17203	0.851794	1.67797	4.12279	0.0734894	-0.0604556	-0.00851777	0.391027	0.490457	30.5878
ENSMUSG00000006218	Fam131c	4	+	141368220	141384175	family with sequence similarity 131, member C [Source:MGI Symbol;Acc:MGI:2685539]	protein_coding	0.0986834	-0.0230911	-0.0683059	0.590331	0.0435492	0.146425	0.0557911	-0.163219	0.131906	1.69133	2.31956	2.01874	0.128948	-0.00559417	-0.00180112	-0.161787	0.106983	0.0777168
ENSMUSG00000006219	Fblim1	4	-	141576062	141606096	filamin binding LIM protein 1 [Source:MGI Symbol;Acc:MGI:1921452]	protein_coding	6.89516	3.43474	0.308366	0.589862	-0.146464	2.79628	-0.444292	2.01461	1.11546	14.6993	4.5907	7.17877	0.464443	0.0239176	0.279606	0.828414	0.569587	58.3553
ENSMUSG00000006221	Hspb7	4	+	141420779	141425311	heat shock protein family, member 7 (cardiovascular) [Source:MGI Symbol;Acc:MGI:1352494]	protein_coding	0.518029	0.0573701	-0.10749	0.514524	0.454977	1.1347	-0.14333	0.882115	0.42467	1.87783	2.25123	2.60081	0.034039	-0.0281607	-0.00489566	-0.0451817	0.249632	3.82025
ENSMUSG00000006235	Epor	9	-	21958897	21963506	erythropoietin receptor [Source:MGI Symbol;Acc:MGI:95408]	protein_coding	0.298389	2.30802	0.841196	2.41163	21.2971	2.46718	0.00801606	2.16789	0.757214	3.69662	1.54827	3.62984	0.0209993	-0.0167519	-0.00388056	-0.2007	0.839024	0.0245249
ENSMUSG00000006241	Ccdc159	9	+	21927471	21935872	coiled-coil domain containing 159 [Source:MGI Symbol;Acc:MGI:1914369]	protein_coding	0.195904	-0.0821537	-0.088968	1.21654	0.431329	0.660321	0.2284	0.716327	0.331401	3.10054	2.42977	2.33011	0.221773	-0.0096623	0.353771	-0.409263	0.629114	0.315339
ENSMUSG00000006262	Mob1b	5	+	88720855	88764220	MOB kinase activator 1B [Source:MGI Symbol;Acc:MGI:1915723]	protein_coding	3.12821	10.5306	5.47615	49.6656	82.8991	6.79113	0.768412	1.67725	0.457486	6.22079	5.24295	3.41897	11.0337	4.7053	8.50633	5.43829	0.797558	1.03265
ENSMUSG00000006269	Atp6v1b1	6	+	83742990	83758855	ATPase, H+ transporting, lysosomal V1 subunit B1 [Source:MGI Symbol;Acc:MGI:103285]	protein_coding	0.526745	-0.0148318	1.17959	0.986291	2.75618	1.73219	0.0207717	1.03157	1.07148	4.95789	6.1276	6.18303	0.0342375	-0.0269351	-0.00633979	-0.314223	0.858629	0.189709
ENSMUSG00000006270	Vax1	19	-	59166187	59170056	ventral anterior homeobox 1 [Source:MGI Symbol;Acc:MGI:1277163]	protein_coding	0.27295	-0.0314401	-0.188923	0.218052	0.404491	0.604609	0.072336	0.851189	0.618387	2.764	3.29601	2.93829	0.0192968	-0.0149194	-0.00407284	-0.276287	0.246886	0.108172
ENSMUSG00000006273	Atp6v1b2	8	+	69088646	69113711	ATPase, H+ transporting, lysosomal V1 subunit B2 [Source:MGI Symbol;Acc:MGI:109618]	protein_coding	21.6509	7.41123	4.36158	13.2312	6.35927	8.01643	5.10324	8.4258	3.02772	43.2237	18.7999	15.8701	38.3326	37.7029	63.2048	16.2152	5.12144	37.4306
ENSMUSG00000006276	Eps15l1	8	-	72340999	72421460	epidermal growth factor receptor pathway substrate 15-like 1 [Source:MGI Symbol;Acc:MGI:104582]	protein_coding	2.77239	5.31636	0.103768	1.79894	2.93145	2.2666	15.0892	10.6002	2.10618	3.77706	4.51091	6.99103	2.52074	12.2155	3.73972	2.91298	2.58357	13.2489
ENSMUSG00000006281	Tep1	14	-	50824059	50870560	telomerase associated protein 1 [Source:MGI Symbol;Acc:MGI:109573]	protein_coding	2.60751	1.21879	2.13628	0.578797	0.59098	3.59632	1.11737	0.552272	0.0829391	3.04911	2.94525	3.09665	9.60585	4.72276	7.5294	2.28781	0.184761	0.923417
ENSMUSG00000006288	Ttc5	14	-	50765415	50785519	tetratricopeptide repeat domain 5 [Source:MGI Symbol;Acc:MGI:2683584]	protein_coding	7.64237	13.2509	8.35078	2.22549	7.47324	6.65293	-0.157502	7.06442	0.0952921	6.49948	4.83211	12.0087	9.13726	21.8628	29.5375	1.42091	0.362194	-0.0515489
ENSMUSG00000006289	Osgep	14	-	50906478	50924893	O-sialoglycoprotein endopeptidase [Source:MGI Symbol;Acc:MGI:1913496]	protein_coding	11.8493	346.411	53.5506	31.1295	14.0396	11.7005	16.5946	1.95388	6.2142	19.7782	30.2871	10.0109	58.7299	179.964	50.7102	410.159	331.122	38.1416
ENSMUSG00000006299	Aamp	1	-	74279840	74284738	angio-associated migratory protein [Source:MGI Symbol;Acc:MGI:107809]	protein_coding	4.79201	0.514879	3.47834	18.2591	34.9103	74.8022	52.3383	5.88825	3.72956	5.02706	9.52768	10.4721	40.309	9.47738	7.84236	15.8653	306.425	9.0452
ENSMUSG00000006301	Tmbim1	1	-	74288247	74305622	transmembrane BAX inhibitor motif containing 1 [Source:MGI Symbol;Acc:MGI:1916910]	protein_coding	4.80295	2.76064	14.1849	32.3422	3.11122	3.73799	-0.0459029	2.3223	1.26291	4.49361	5.72067	3.857	2.2066	2.7493	2.45105	1.2387	1.21496	0.240901
ENSMUSG00000006304	Arpc2	1	+	74236084	74268209	actin related protein 2/3 complex, subunit 2 [Source:MGI Symbol;Acc:MGI:1923959]	protein_coding	64.8715	60.8054	112.756	480.488	109.884	290.922	262.416	114.951	1157.91	170.832	232.484	120.805	683.602	721.225	775.894	161.103	13.6592	331.615
ENSMUSG00000006307	Kmt2b	7	-	30568858	30588726	lysine (K)-specific methyltransferase 2B [Source:MGI Symbol;Acc:MGI:109565]	protein_coding	4.44503	0.185437	1.87642	1.26419	0.596717	2.07695	3.03791	1.40707	3.55133	3.05403	6.6202	3.45151	2.56076	5.0079	1.41965	3.32789	0.737173	4.95445
ENSMUSG00000006310	Zbtb32	7	-	30589681	30598909	zinc finger and BTB domain containing 32 [Source:MGI Symbol;Acc:MGI:1891838]	protein_coding	0.433666	1.00076	1.50025	1.73717	2.32966	0.416245	0.28961	-0.0372958	0.853933	3.52145	4.57522	4.19135	0.0288203	-0.021483	0.189507	1.63473	0.453436	0.365116
ENSMUSG00000006311	Etv2	7	-	30633616	30635852	ets variant 2 [Source:MGI Symbol;Acc:MGI:99253]	protein_coding	0.144858	-0.019363	-0.109282	0.517937	0.262847	0.941156	0.0441811	-0.184636	0.174554	0.872395	1.81135	2.22625	0.0107651	-0.0083529	-0.00231688	-0.172102	0.134325	0.0648427
ENSMUSG00000006313	Upk1a	7	-	30603092	30612847	uroplakin 1A [Source:MGI Symbol;Acc:MGI:98911]	protein_coding	0.136008	-0.0635983	-0.0599384	0.512882	0.101399	0.753296	0.171236	0.0812305	0.350409	1.48775	1.16133	2.27189	0.56365	-0.00679111	-0.00309762	-0.327321	0.204926	0.233763
ENSMUSG00000006315	Tmem147	7	-	30727701	30729540	transmembrane protein 147 [Source:MGI Symbol;Acc:MGI:1915011]	protein_coding	4.57596	0.711884	1.81966	3.06229	9.74008	233.473	2.55148	19.3293	4.7561	24.8355	6.42526	17.6313	286.854	143.151	77.24	6.48511	5.63519	21.0247
ENSMUSG00000006333	Rps9	7	+	3703993	3706897	ribosomal protein S9 [Source:MGI Symbol;Acc:MGI:1924096]	protein_coding	260.607	86.8874	233.591	496.434	305.218	869.022	297.879	167.993	2048.79	881.556	1883.94	302.401	3132.42	3160.28	2668.84	345.389	35.0224	459.595
ENSMUSG00000006335	Tfpt	7	-	3620324	3629929	TCF3 (E2A) fusion partner [Source:MGI Symbol;Acc:MGI:1916964]	protein_coding	1.19692	-0.0309573	4.98466	1.1697	4.898	0.860275	0.221074	0.124448	1.3049	4.03409	4.44978	1.08785	10.663	-0.0494392	-0.0118301	8.61912	1.68266	0.108391
ENSMUSG00000006342	Susd2	10	-	75636706	75644008	sushi domain containing 2 [Source:MGI Symbol;Acc:MGI:1918983]	protein_coding	0.563929	0.00915805	0.815655	0.561925	0.521138	0.381385	-0.0392821	0.458422	0.639856	1.47641	3.01512	3.33558	0.0363158	-0.0290039	-0.00621968	0.244005	0.365037	0.786741
ENSMUSG00000006344	Ggt5	10	+	75589340	75617200	gamma-glutamyltransferase 5 [Source:MGI Symbol;Acc:MGI:1346063]	protein_coding	3.6493	1.42319	4.50313	21.5298	1.19366	1.57815	0.536061	0.598853	0.355746	2.52868	3.85321	6.39292	0.289057	0.00180598	-0.00252926	1.14005	0.26432	0.749362
ENSMUSG00000006345	Ggt1	10	+	75561604	75586200	gamma-glutamyltransferase 1 [Source:MGI Symbol;Acc:MGI:95706]	protein_coding	0.604987	0.580334	1.02071	0.897325	1.16255	2.52746	0.0879803	0.408846	0.609708	3.08503	6.87341	8.17362	0.0384314	-0.030492	-0.00672202	-0.2842	1.00756	-0.00547959
ENSMUSG00000006356	Crip2	12	+	113140236	113145506	cysteine rich protein 2 [Source:MGI Symbol;Acc:MGI:1915587]	protein_coding	3.27224	12.1938	2.59212	1.38108	11.1095	7.90797	41.9787	5.81631	3.15291	13.7704	10.0014	17.2678	0.518948	-0.0964426	0.171304	0.280649	9.68627	-0.543248
ENSMUSG00000006360	Crip1	12	+	113146316	113153879	cysteine-rich protein 1 (intestinal) [Source:MGI Symbol;Acc:MGI:88501]	protein_coding	64.2207	57.375	168.809	328.999	471.97	343.403	214.045	36.4555	1575.65	145.689	34.346	209.93	2424.82	2771.01	2062.29	185.111	20.9866	76.0766
ENSMUSG00000006362	Cbfa2t3	8	-	122625141	122699109	CBFA2/RUNX1 translocation partner 3 [Source:MGI Symbol;Acc:MGI:1338013]	protein_coding	6.08148	1.8432	0.229177	10.9045	2.13221	3.27146	16.4237	2.71984	0.211412	55.4782	4.34831	5.70294	31.2286	8.19844	12.4285	2.50992	0.541641	1.69759
ENSMUSG00000006369	Fbln1	15	+	85205949	85286535	fibulin 1 [Source:MGI Symbol;Acc:MGI:95487]	protein_coding	1.12811	2.03237	0.878907	0.805647	2.63006	0.662087	1.77172	0.807717	1.08198	4.07107	4.50705	3.46026	0.675098	-0.0499371	0.32031	0.973843	0.802629	1.07711
ENSMUSG00000006373	Pgrmc1	X	+	36598206	36606079	progesterone receptor membrane component 1 [Source:MGI Symbol;Acc:MGI:1858305]	protein_coding	12.9353	1.72097	3.05763	1.08439	11.6628	6.0888	6.97113	7.38734	1.76242	39.1237	4.93482	5.6638	42.6864	6.86366	18.9676	7.31013	1.45751	27.4613
ENSMUSG00000006378	Gcat	15	+	79030874	79038353	glycine C-acetyltransferase (2-amino-3-ketobutyrate-coenzyme A ligase) [Source:MGI Symbol;Acc:MGI:1349389]	protein_coding	1.52666	-0.00854891	2.81146	1.09255	1.352	47.236	-0.0147673	0.298073	1.99358	1.73749	4.99709	3.38319	1.63082	8.22818	12.9531	-0.510662	1.35497	0.139683
ENSMUSG00000006386	Tek	4	+	94739289	94874976	TEK receptor tyrosine kinase [Source:MGI Symbol;Acc:MGI:98664]	protein_coding	0.284412	-0.0498658	0.682646	0.670145	0.106115	0.504629	0.124282	0.127356	0.557147	3.10489	1.98986	2.06827	0.019952	-0.0150592	-0.00457136	1.05968	0.289964	0.321133
ENSMUSG00000006389	Mpl	4	-	118442415	118457513	myeloproliferative leukemia virus oncogene [Source:MGI Symbol;Acc:MGI:97076]	protein_coding	0.765181	-0.156801	0.465803	0.555933	7.42594	1.15816	0.539458	0.186932	0.314949	3.8722	1.63903	2.53364	-0.0173673	0.0179437	-0.000264642	2.74015	0.333262	0.721945
ENSMUSG00000006390	Elovl1	4	+	118428093	118432953	elongation of very long chain fatty acids (FEN1/Elo2, SUR4/Elo3, yeast)-like 1 [Source:MGI Symbol;Acc:MGI:1858959]	protein_coding	38.709	9.92803	3.50666	1.41049	9.35742	210.54	26.2677	8.72287	3.59039	54.5917	12.4216	11.7513	33.6703	42.1343	46.4976	0.510102	10.2564	13.9744
ENSMUSG00000006392	Med8	4	+	118409337	118415782	mediator complex subunit 8 [Source:MGI Symbol;Acc:MGI:1915269]	protein_coding	13.7226	10.2892	4.98738	0.820133	10.444	4.65976	114.066	5.7461	1022.31	4.49914	5.71674	14.7386	51.091	81.3539	16.3484	14.8717	2.7105	122.439
ENSMUSG00000006395	Hyi	4	+	118359990	118362744	hydroxypyruvate isomerase (putative) [Source:MGI Symbol;Acc:MGI:1915430]	polymorphic_pseudogene	8.85992	1.75343	4.77049	3.31839	4.13472	3.0096	0.615735	1.8927	0.595951	3.46345	4.47672	7.05363	12.6759	14.2295	3.97959	0.0580565	2.09974	-0.0381881
ENSMUSG00000006398	Cdc20	4	-	118432901	118437352	cell division cycle 20 [Source:MGI Symbol;Acc:MGI:1859866]	protein_coding	0.883539	2.14617	4.09293	0.326247	8.6773	6.36163	-0.496309	6.9085	1.3756	14.9293	2.26382	7.11852	121.172	115.044	94.7968	2.33381	57.4799	2.89898
ENSMUSG00000006403	Adamts4	1	+	171250421	171260637	a disintegrin-like and metallopeptidase (reprolysin type) with thrombospondin type 1 motif, 4 [Source:MGI Symbol;Acc:MGI:1339949]	protein_coding	1.61335	2.0475	1.00424	0.342341	0.291355	1.14704	0.255843	1.16979	0.310195	2.27114	1.94476	2.83105	0.000655603	0.00109974	-0.00175299	-0.320238	0.428369	0.600432
ENSMUSG00000006411	Nectin4	1	+	171370099	171388598	nectin cell adhesion molecule 4 [Source:MGI Symbol;Acc:MGI:1918990]	protein_coding	0.234461	2.21102	0.458044	0.419274	0.0760187	0.647015	0.0760798	0.108629	0.2885	1.42536	1.97355	1.44513	0.0168024	-0.0129201	0.574878	-0.263068	0.402902	0.166199
ENSMUSG00000006412	Pfdn2	1	+	171345670	171359254	prefoldin 2 [Source:MGI Symbol;Acc:MGI:1276111]	protein_coding	41.6811	78.1758	21.0802	1.02747	7.21725	14.9358	1.50547	15.9109	51.0333	89.351	4.49717	21.1008	31.9854	23.898	37.4889	9.09424	8.02996	27.1525
ENSMUSG00000006418	Rnf114	2	+	167492645	167516173	ring finger protein 114 [Source:MGI Symbol;Acc:MGI:1933159]	protein_coding	10.4665	7.03151	1.96146	4.43564	12.93	2.23404	27.7222	89.8432	4.9683	5.88869	4.39084	7.47715	4.73817	15.2637	14.5826	4.39958	6.79744	12.9205
ENSMUSG00000006423	C330007P06Rik	X	-	36823737	36874111	RIKEN cDNA C330007P06 gene [Source:MGI Symbol;Acc:MGI:1924894]	protein_coding	3.91989	10.6344	1.71035	0.776671	2.92433	1.56965	16.6256	3.30249	1.12536	65.0085	6.57808	5.48009	1.19873	1.33057	8.58562	1.44621	0.860446	-0.115258
ENSMUSG00000006435	Neurl1a	19	+	47178820	47259441	neuralized E3 ubiquitin protein ligase 1A [Source:MGI Symbol;Acc:MGI:1334263]	protein_coding	0.509727	-0.0433084	0.642954	0.914733	0.27532	0.47112	0.207717	0.796736	0.601874	3.36791	6.85989	5.95634	0.670426	0.0909625	0.30007	-0.25793	1.34344	0.181024
ENSMUSG00000006442	Srm	4	+	148591503	148594993	spermidine synthase [Source:MGI Symbol;Acc:MGI:102690]	protein_coding	6.60809	0.921781	1.32533	1.09346	17.4327	14.6635	4.51833	11.492	6.25211	2.12781	5.91018	12.0406	93.432	32.0398	37.794	3.66718	8.164	12.4396
ENSMUSG00000006445	Epha2	4	+	141301240	141329384	Eph receptor A2 [Source:MGI Symbol;Acc:MGI:95278]	protein_coding	0.952451	0.351257	1.76252	0.75437	0.0388508	0.782326	-0.0228303	0.731676	0.880174	4.4218	4.54908	3.40425	0.211423	0.610565	0.481095	-0.165397	0.66732	-0.188955
ENSMUSG00000006456	Rbm14	19	-	4800569	4811634	RNA binding motif protein 14 [Source:MGI Symbol;Acc:MGI:1929092]	protein_coding	3.68897	0.708676	2.41128	62.4286	2.94469	3.55417	9.74762	1.64645	0.47321	-0.0515386	1.65435	3.35981	22.4495	13.043	13.7088	0.165564	0.91424	-0.276496
ENSMUSG00000006457	Actn3	19	-	4861216	4877909	actinin alpha 3 [Source:MGI Symbol;Acc:MGI:99678]	protein_coding	0.532438	0.597198	0.485876	0.318781	0.562807	3.84466	0.718998	0.986661	0.560595	9.18642	14.9899	3.20112	0.299524	-0.0272674	-0.00631091	-0.302495	0.383688	0.0361305
ENSMUSG00000006462	A530013C23Rik	2	+	167691177	167729172	RIKEN cDNA A530013C23 gene [Source:MGI Symbol;Acc:MGI:3041178]	lincRNA	3.19018	3.29911	2.19783	0.508404	0.317516	2.07533	0.18617	0.325915	0.404821	4.21736	6.09677	4.1885	0.00563992	-0.00320385	-0.00241217	-0.0414885	0.166031	1.36925
ENSMUSG00000006463	Zdhhc24	19	+	4878668	4885397	zinc finger, DHHC domain containing 24 [Source:MGI Symbol;Acc:MGI:1917855]	protein_coding	1.31127	0.114464	0.0139623	0.788499	1.18321	1.05963	11.6923	1.99558	1.31931	2.90159	3.5352	2.20563	8.98273	3.21508	1.10111	-0.103626	0.572115	-0.218663
ENSMUSG00000006464	Bbs1	19	-	4886878	4906628	Bardet-Biedl syndrome 1 (human) [Source:MGI Symbol;Acc:MGI:1277215]	protein_coding	4.16993	3.10203	1.84667	1.06058	0.403204	0.780545	0.697596	1.61507	0.155826	3.45186	4.40271	2.41202	0.673497	0.0195358	0.921578	-0.108563	0.280613	1.20196
ENSMUSG00000006469	Slc34a3	2	-	25228898	25234364	solute carrier family 34 (sodium phosphate), member 3 [Source:MGI Symbol;Acc:MGI:2159410]	protein_coding	0.540926	2.49761	0.211397	0.634655	0.162358	2.03105	0.417288	0.813357	0.182412	3.6517	2.23025	2.88068	-0.00465788	0.00665138	-0.00195867	-0.455441	0.429168	0.71031
ENSMUSG00000006471	Ndor1	2	-	25244821	25256022	NADPH dependent diflavin oxidoreductase 1 [Source:MGI Symbol;Acc:MGI:1926047]	protein_coding	0.363771	0.0155184	0.33637	0.70596	1.63033	2.02501	-0.0490726	0.458541	0.497594	3.71753	2.9456	4.31615	0.101611	-0.0204179	0.274894	-0.14341	0.76353	0.242861
ENSMUSG00000006476	Nsmf	2	+	25054355	25062881	NMDA receptor synaptonuclear signaling and neuronal migration factor [Source:MGI Symbol;Acc:MGI:1861755]	protein_coding	5.01355	-0.00471966	9.66702	2.12433	2.33705	1.93419	0.505	0.743391	2.2198	2.58034	2.80385	1.66438	3.69487	0.166004	0.961	2.28057	1.38946	0.487613
ENSMUSG00000006488	Prl7a1	13	-	27633366	27642493	prolactin family 7, subfamily a, member 1 [Source:MGI Symbol;Acc:MGI:1206572]	protein_coding	0.167883	4.66869	0.789243	0.260212	0.133558	0.717187	0.232918	-0.376857	0.301602	1.59086	1.00767	1.81683	0.0121158	-0.00810138	-0.00390094	1.3014	0.26704	0.437427
ENSMUSG00000006490	Prl8a9	13	-	27557995	27564606	prolactin family8, subfamily a, member 9 [Source:MGI Symbol;Acc:MGI:1914560]	protein_coding	0.0853332	-0.0538015	-0.0262338	0.406824	0.0799993	0.655043	0.143413	-0.247794	0.162679	2.36969	0.792816	2.18225	0.00633901	-0.00406459	-0.0022436	-0.270331	0.148494	0.193289
ENSMUSG00000006494	Pdk1	2	+	71873224	71903858	pyruvate dehydrogenase kinase, isoenzyme 1 [Source:MGI Symbol;Acc:MGI:1926119]	protein_coding	15.6636	2.06008	10.404	16.9306	3.38207	2.84371	0.487066	1.29599	0.471012	29.5831	2.67857	8.67011	4.67323	3.86545	0.487237	2.87841	1.62215	0.566931
ENSMUSG00000006498	Ptbp1	10	+	79854427	79864771	polypyrimidine tract binding protein 1 [Source:MGI Symbol;Acc:MGI:97791]	protein_coding	10.7469	3.69174	4.86285	8.13569	15.859	22.9841	32.2217	8.84222	14.8956	10.9048	17.5819	16.6563	9.6535	18.3996	4.99587	5.03073	2.71946	3.97473
ENSMUSG00000006517	Mvd	8	-	122433601	122443422	mevalonate (diphospho) decarboxylase [Source:MGI Symbol;Acc:MGI:2179327]	protein_coding	0.364419	1.96213	1.66977	1.41124	0.221036	1.39703	0.0778496	1.67509	0.445341	1.90234	1.5119	3.56752	10.0236	5.05388	0.0156348	0.829619	1.66244	0.202768
ENSMUSG00000006519	Cyba	8	-	122424776	122432930	cytochrome b-245, alpha polypeptide [Source:MGI Symbol;Acc:MGI:1316658]	protein_coding	92.8004	75.2091	130.568	514.269	82.5944	146.845	371.915	594.819	282.609	306.816	325.543	142.061	705.204	605.993	491.204	161.051	2659.12	424.399
ENSMUSG00000006522	Itih3	14	-	30908572	30923760	inter-alpha trypsin inhibitor, heavy chain 3 [Source:MGI Symbol;Acc:MGI:96620]	protein_coding	0.415209	-0.0341701	0.488223	0.778984	0.222227	0.563805	0.075416	1.0523	0.655212	1.61309	2.66527	3.39685	0.0279278	-0.0216514	-0.00563973	-0.338705	0.507556	0.162997
ENSMUSG00000006526	Stimate	14	+	30825590	30877210	STIM activating enhancer [Source:MGI Symbol;Acc:MGI:1921500]	protein_coding	4.53904	1.78819	5.76153	52.8161	2.78696	1.36551	0.278353	0.273835	0.0960421	2.09504	1.37183	8.12687	0.170167	0.783143	2.20472	0.191441	0.349746	0.363733
ENSMUSG00000006527	Sfmbt1	14	+	30714849	30822721	Scm-like with four mbt domains 1 [Source:MGI Symbol;Acc:MGI:1859609]	protein_coding	13.0117	4.51722	4.95095	1.90192	3.06785	0.850251	0.847703	1.05417	0.0205265	2.79277	3.53434	2.759	0.664905	0.657943	0.42299	1.6997	0.29772	0.850911
ENSMUSG00000006529	Itih1	14	-	30929180	30943289	inter-alpha trypsin inhibitor, heavy chain 1 [Source:MGI Symbol;Acc:MGI:96618]	protein_coding	3.16529	1.96101	1.70919	0.345324	0.11606	0.750904	0.325393	1.29964	0.153443	1.87607	1.81002	2.54127	-0.00870261	0.0678858	-0.000669212	-0.356587	0.239931	0.428563
ENSMUSG00000006538	Ihh	1	-	74945315	74951672	Indian hedgehog [Source:MGI Symbol;Acc:MGI:96533]	protein_coding	0.160508	-0.126749	-0.0132375	1.60575	0.952105	0.79311	0.391611	1.02296	0.652872	3.25445	2.74087	4.7408	0.0509826	-0.00657335	4.14108	-0.144691	0.685338	0.589422
ENSMUSG00000006542	Prkag3	1	-	74738922	74749221	protein kinase, AMP-activated, gamma 3 non-catalytic subunit [Source:MGI Symbol;Acc:MGI:1891343]	protein_coding	2.59791	6.30638	0.614352	0.631048	0.207708	1.56038	0.580933	1.02546	0.190787	3.66682	2.4709	2.90084	-0.00984025	0.0118421	-0.00188182	-0.423391	0.40715	1.37552
ENSMUSG00000006546	Cryba2	1	-	74889934	74893143	crystallin, beta A2 [Source:MGI Symbol;Acc:MGI:104336]	protein_coding	0.288076	-0.0373227	-0.193549	0.501917	0.0902295	1.37657	0.262941	-0.045686	0.353706	2.45069	1.7882	2.85598	0.0202336	-0.0155409	-0.00435911	-0.302402	0.268614	0.129966
ENSMUSG00000006567	Atp7b	8	-	21992785	22060305	ATPase, Cu++ transporting, beta polypeptide [Source:MGI Symbol;Acc:MGI:103297]	protein_coding	0.773438	1.52925	1.25831	0.420731	1.07583	0.416656	0.247529	0.251016	0.476359	1.90265	1.15919	1.70652	0.00829998	-0.00529462	-0.00295267	0.381552	0.261444	0.336386
ENSMUSG00000006570	Defb2	8	+	21839926	21843482	defensin beta 2 [Source:MGI Symbol;Acc:MGI:1338754]	protein_coding	-0.148138	17.5678	0.311737	0.331309	0.104404	-0.161889	0.325404	-0.225633	-0.0256733	4.07088	0.0098801	2.82461	-0.0131051	0.0131277	0.000149432	1.59048	0.04344	0.424316
ENSMUSG00000006574	Slc4a1	11	-	102348824	102366203	solute carrier family 4 (anion exchanger), member 1 [Source:MGI Symbol;Acc:MGI:109393]	protein_coding	4.94676	9.59404	0.430185	1.70755	8.59117	1.58371	0.148175	2.2727	0.602264	4.32771	3.92142	5.19273	0.0205865	1.28151	1.72764	-0.317121	0.313729	4.47102
ENSMUSG00000006575	Rundc3a	11	+	102393403	102402555	RUN domain containing 3A [Source:MGI Symbol;Acc:MGI:1858752]	protein_coding	0.385446	-0.129619	0.437411	1.04851	0.874969	1.05239	0.557251	-0.354396	0.649159	3.59409	2.96961	4.87713	0.0257892	-0.0179329	5.00088	2.95596	1.99441	0.949255
ENSMUSG00000006576	Slc4a3	1	+	75546266	75562172	solute carrier family 4 (anion exchanger), member 3 [Source:MGI Symbol;Acc:MGI:109350]	protein_coding	0.383208	0.341074	0.705582	1.30182	0.500196	1.3107	0.231022	2.70557	0.815442	3.81978	3.15956	4.87494	0.124082	-0.019437	0.777543	-0.116362	0.509204	0.640169
ENSMUSG00000006585	Cdt1	8	+	122568015	122573554	chromatin licensing and DNA replication factor 1 [Source:MGI Symbol;Acc:MGI:1914427]	protein_coding	5.16036	0.676532	1.85779	0.530597	8.69407	3.1218	-0.251329	3.42866	0.667371	93.4978	18.9699	4.72361	52.9355	57.0401	53.0561	3.83651	1.84333	5.78108
ENSMUSG00000006586	Runx1t1	4	+	13743436	13893649	RUNX1 translocation partner 1 [Source:MGI Symbol;Acc:MGI:104793]	protein_coding	4.51628	3.08365	1.88011	1.0235	0.754867	0.458223	0.87929	0.753617	0.159213	2.48184	2.73775	2.33388	0.0942902	0.071487	0.517074	1.81889	0.656643	1.3133
ENSMUSG00000006587	Snai3	8	-	122454208	122460733	snail family zinc finger 3 [Source:MGI Symbol;Acc:MGI:1353563]	protein_coding	1.38664	0.785985	1.82211	0.243607	0.203961	0.630199	0.0809612	0.623685	0.235166	1.97603	1.93285	1.67914	0.0133066	-0.0101059	-0.0030568	-0.243548	0.185367	0.158515
ENSMUSG00000006589	Aprt	8	-	122574635	122576909	adenine phosphoribosyl transferase [Source:MGI Symbol;Acc:MGI:88061]	protein_coding	2.94254	3.45337	20.6147	30.3557	15.6448	10.5501	-0.0363836	21.6541	4.60808	54.0105	23.1966	16.0217	128.68	141.284	137.148	17.9796	7.94333	-0.0677656
ENSMUSG00000006599	Gtf2h1	7	+	46796103	46823800	general transcription factor II H, polypeptide 1 [Source:MGI Symbol;Acc:MGI:1277216]	protein_coding	17.0003	0.459455	2.89221	10.038	2.61618	6.59268	1.73872	7.89613	0.438054	39.2008	2.43947	6.71675	20.0421	8.54529	3.98429	9.90214	0.96658	13.4577
ENSMUSG00000006611	Hfe	13	-	23702034	23710854	homeostatic iron regulator [Source:MGI Symbol;Acc:MGI:109191]	protein_coding	1.33875	2.23491	2.2363	0.902384	1.56581	2.10938	-0.268179	1.04711	0.994173	35.8996	2.53366	5.11462	0.530506	1.12519	3.17872	0.0197692	1.08118	-0.0734822
ENSMUSG00000006638	Abhd1	5	+	30950066	30955091	abhydrolase domain containing 1 [Source:MGI Symbol;Acc:MGI:1931013]	polymorphic_pseudogene	0.268607	0.113032	-0.291785	0.165549	0.120824	0.853172	14.4514	1.31334	0.313486	0.173861	0.470446	0.39803	0.0195488	-0.01786	4.56197	0.379238	0.0195429	-0.288859
ENSMUSG00000006641	Slc5a6	5	-	31036036	31048924	solute carrier family 5 (sodium-dependent vitamin transporter), member 6 [Source:MGI Symbol;Acc:MGI:2660847]	protein_coding	3.63844	-0.123288	3.70374	0.213269	0.867952	1.74299	2.11883	1.90033	56.8957	4.02686	1.36243	4.99114	0.0621145	3.3927	0.00395896	1.17939	0.0239776	2.64717
ENSMUSG00000006642	Tcf23	5	+	30968662	30977018	transcription factor 23 [Source:MGI Symbol;Acc:MGI:1934960]	protein_coding	4.00919	0.537176	1.24018	0.640093	0.961568	1.32718	0.411633	1.85227	0.460493	3.79916	2.34279	2.55492	0.00988174	-0.0060864	-0.0037213	0.425946	0.363843	1.73715
ENSMUSG00000006649	Nphs1	7	+	30458315	30487223	nephrosis 1, nephrin [Source:MGI Symbol;Acc:MGI:1859637]	protein_coding	0.295147	-0.052095	0.319704	0.529918	0.35327	0.755311	0.237552	0.804234	0.387304	2.93164	4.75446	1.90898	0.0311005	0.74593	-0.0047355	0.0488542	0.724041	0.187136
ENSMUSG00000006651	Aplp1	7	-	30434982	30445535	amyloid beta (A4) precursor-like protein 1 [Source:MGI Symbol;Acc:MGI:88046]	protein_coding	0.535679	1.07818	0.909186	0.784628	2.30024	2.11535	0.171135	0.290678	0.682874	2.91579	1.42858	1.65929	0.252551	-0.0260582	-0.00749017	0.705321	0.509383	0.565397
ENSMUSG00000006673	Qrich1	9	+	108516806	108560163	glutamine-rich 1 [Source:MGI Symbol;Acc:MGI:1916482]	protein_coding	7.76783	9.55083	5.42499	17.3266	10.4509	20.2607	2.028	7.40955	1.85531	71.5895	8.27975	18.5423	21.4435	31.9867	31.2876	7.47125	1.65128	3.06873
ENSMUSG00000006675	P4htm	9	-	108578862	108597667	prolyl 4-hydroxylase, transmembrane (endoplasmic reticulum) [Source:MGI Symbol;Acc:MGI:1921693]	protein_coding	0.130961	1.18569	0.541033	0.763718	0.80747	1.90709	0.398161	0.428588	0.709859	3.08205	2.95034	1.45085	0.304011	-0.00486356	0.238887	1.43922	0.735962	0.54893
ENSMUSG00000006676	Usp19	9	+	108490602	108502337	ubiquitin specific peptidase 19 [Source:MGI Symbol;Acc:MGI:1918722]	protein_coding	2.62591	4.05371	10.2705	31.0191	14.5261	5.44409	2.193	2.74889	5.46022	11.6707	7.18949	9.6523	4.77095	15.04	15.3007	3.2271	35.3687	0.417641
ENSMUSG00000006678	Pola1	X	-	93304767	93632155	polymerase (DNA directed), alpha 1 [Source:MGI Symbol;Acc:MGI:99660]	protein_coding	8.39418	5.75759	5.20148	0.552906	1.57308	1.7966	16.8428	0.413464	0.551301	1.72654	4.95623	6.59548	11.3754	11.2658	9.82677	4.42367	1.31635	-0.170711
ENSMUSG00000006699	Cdc42	4	-	137319696	137357720	cell division cycle 42 [Source:MGI Symbol;Acc:MGI:106211]	protein_coding	42.8838	150.627	103.934	312.401	73.2747	66.4534	93.1253	1218.84	199.166	253.147	30.6735	86.3798	231.293	250.287	262.332	71.2602	303.736	185.54
ENSMUSG00000006705	Pknox1	17	+	31564734	31607693	Pbx/knotted 1 homeobox [Source:MGI Symbol;Acc:MGI:1201409]	protein_coding	29.6203	5.41183	2.18431	4.53002	3.38517	2.7753	24.0507	2.56488	1.3247	3.49602	7.17992	12.6819	6.08293	6.31533	4.03114	3.68428	0.980822	11.6249
ENSMUSG00000006711	D130043K22Rik	13	+	24845135	24901270	RIKEN cDNA D130043K22 gene [Source:MGI Symbol;Acc:MGI:3036268]	protein_coding	-0.00509173	1.49278	0.136482	1.80087	0.347104	1.69582	0.356576	0.0797661	0.324703	2.82573	1.4653	1.78193	0.0711242	0.00317715	-0.00230366	0.468653	0.18762	0.514704
ENSMUSG00000006715	Gmnn	13	-	24751845	24761923	geminin [Source:MGI Symbol;Acc:MGI:1927344]	protein_coding	52.1312	22.2297	1.82836	171.304	55.1751	8.55286	35.4706	8.38473	4.08734	20.9686	3.63117	10.6923	159.393	258.671	278.024	2.99643	0.741565	24.1377
ENSMUSG00000006717	Acot13	13	-	24817948	24831540	acyl-CoA thioesterase 13 [Source:MGI Symbol;Acc:MGI:1914084]	protein_coding	1.89595	0.203158	4.85913	4.18264	21.2331	4.00575	-0.393705	1.52584	1.33743	8.40976	8.77019	5.59735	77.8556	33.1702	22.5251	0.0834873	5.33108	-0.443786
ENSMUSG00000006720	Zfp184	13	+	21945094	21960779	zinc finger protein 184 (Kruppel-like) [Source:MGI Symbol;Acc:MGI:1922244]	protein_coding	0.333768	-0.0891349	0.626985	0.380469	0.1681	0.045928	0.246572	0.9532	0.532369	1.16307	2.39211	1.52888	0.0228601	1.88499	0.0176308	1.77546	0.741974	0.817853
ENSMUSG00000006724	Cyp27b1	10	+	127048250	127053006	cytochrome P450, family 27, subfamily b, polypeptide 1 [Source:MGI Symbol;Acc:MGI:1098274]	protein_coding	4.83179	-0.104121	1.5765	0.716512	0.282374	0.878333	0.312342	0.627483	0.174109	3.15207	2.05892	3.6994	0.00160563	0.000888821	-0.00248966	0.0227899	0.191916	0.420318
ENSMUSG00000006728	Cdk4	10	+	127063534	127067920	cyclin-dependent kinase 4 [Source:MGI Symbol;Acc:MGI:88357]	protein_coding	30.5666	416.487	69.9349	19.5331	59.4099	22.4362	33.8	40.1417	173.349	86.0664	11.0773	33.5755	170.342	148.721	220.486	45.7844	4.66548	18.4632
ENSMUSG00000006731	B4galnt1	10	+	127165225	127172330	beta-1,4-N-acetyl-galactosaminyl transferase 1 [Source:MGI Symbol;Acc:MGI:1342057]	protein_coding	1.98306	11.2644	2.13006	36.0643	15.1324	87.0796	57.6866	191.733	1.88962	28.8696	192.51	64.132	67.5152	12.1536	46.1312	2.98358	91.9146	8.90138
ENSMUSG00000006732	Mettl1	10	+	127041414	127046365	methyltransferase like 1 [Source:MGI Symbol;Acc:MGI:1339986]	protein_coding	1.24722	-0.0155543	2.01432	2.75949	9.49219	21.704	0.0635692	1.92875	1.85834	4.37077	3.25759	4.85225	7.36819	2.06787	-0.0118491	0.276033	1.66042	0.285494
ENSMUSG00000006736	Tspan31	10	-	127067280	127070264	tetraspanin 31 [Source:MGI Symbol;Acc:MGI:1914375]	protein_coding	-0.116077	4.4123	36.5414	0.792233	13.179	5.55297	1.24745	5.1766	354.516	6.96188	10.9301	17.3024	64.9334	21.9212	23.3242	-0.26954	1.93742	0.448614
ENSMUSG00000006740	Kif5b	18	-	6201002	6242174	kinesin family member 5B [Source:MGI Symbol;Acc:MGI:1098268]	protein_coding	33.9882	18.4655	9.27417	3.78768	83.6072	26.1119	12.7545	2.53511	3.47913	48.3549	9.58904	8.0209	36.9511	12.4269	18.4419	17.8429	4.32178	4.71065
ENSMUSG00000006763	Saal1	7	-	46686108	46710680	serum amyloid A-like 1 [Source:MGI Symbol;Acc:MGI:1926185]	protein_coding	0.520573	9.02405	1.98197	0.735249	1.51758	1.02708	0.244017	0.283691	0.976624	5.26436	4.32091	3.30289	0.511542	6.71119	5.39752	1.17302	0.820872	0.463321
ENSMUSG00000006764	Tph2	10	-	115078641	115185022	tryptophan hydroxylase 2 [Source:MGI Symbol;Acc:MGI:2651811]	protein_coding	0.278435	1.45434	1.36619	0.866324	0.496047	0.244029	0.436442	0.0399659	0.84341	1.90848	3.44252	3.9731	0.128161	0.0263857	-0.006406	1.21467	0.535993	0.614221
ENSMUSG00000006777	Krt23	11	-	99477974	99493137	keratin 23 [Source:MGI Symbol;Acc:MGI:2148866]	protein_coding	0.0211147	2.3794	0.14785	1.27893	0.202685	0.323971	0.481643	0.149423	0.340118	1.76564	1.67024	2.04163	0.00107237	0.00230665	-0.0033701	0.911898	0.274065	0.659765
ENSMUSG00000006782	Cnp	11	+	100574904	100591729	2',3'-cyclic nucleotide 3' phosphodiesterase [Source:MGI Symbol;Acc:MGI:88437]	protein_coding	5.68049	3.59739	5.0147	1.02258	13.331	4.61352	0.0440993	5.29832	1.78359	7.37552	193.755	10.8923	0.129482	2.50784	0.542366	-0.403146	1.53923	0.31159
ENSMUSG00000006784	Ttc25	11	+	100545607	100572568	tetratricopeptide repeat domain 25 [Source:MGI Symbol;Acc:MGI:1921657]	protein_coding	6.32277	3.8988	2.67504	2.98957	0.401489	1.08531	3.75508	2.30024	2.01519	2.23893	3.34151	3.31602	0.242456	2.14132	3.46406	0.249011	0.299653	0.921896
ENSMUSG00000006800	Sulf2	2	-	166073089	166155663	sulfatase 2 [Source:MGI Symbol;Acc:MGI:1919293]	protein_coding	4.19788	2.5058	1.66958	22.6956	3.58222	1.84477	5.86812	2.23084	0.889449	3.31069	14.0674	5.31035	6.8866	17.6467	7.17917	2.63302	0.954408	2.09189
ENSMUSG00000006818	Sod2	17	+	13006846	13040063	superoxide dismutase 2, mitochondrial [Source:MGI Symbol;Acc:MGI:98352]	protein_coding	6.74849	7.45838	13.0554	1.58969	4.57337	6.61734	4.61344	18.7392	22.8174	19.2391	8.51392	12.311	6.94843	18.7618	19.2482	4.71773	2.92463	1.41621
ENSMUSG00000006850	Tmco6	18	+	36735039	36742397	transmembrane and coiled-coil domains 6 [Source:MGI Symbol;Acc:MGI:1919233]	protein_coding	1.00319	0.00637843	3.46909	1.35505	2.13053	1.88649	-0.0419864	0.518971	1.00417	6.28763	4.40895	3.49162	16.1114	1.45784	6.69275	1.17205	2.07363	0.171533
ENSMUSG00000006906	Stambp	6	-	83543211	83572729	STAM binding protein [Source:MGI Symbol;Acc:MGI:1917777]	protein_coding	9.26699	16.1502	5.38876	2.26607	1.47147	1.25942	0.634135	1.8703	0.646194	6.48771	6.06108	5.82273	0.764375	27.2098	0.953922	0.734926	0.916828	1.12597
ENSMUSG00000006920	Ezh1	11	-	101191115	101226463	enhancer of zeste 1 polycomb repressive complex 2 subunit [Source:MGI Symbol;Acc:MGI:1097695]	protein_coding	0.691118	1.9778	3.7375	11.021	2.6527	4.08836	0.0844287	0.362874	1.11933	8.90513	12.5169	6.68959	0.216176	3.05443	2.79204	1.012	1.73169	0.249045
ENSMUSG00000006930	Hap1	11	-	100347327	100356128	huntingtin-associated protein 1 [Source:MGI Symbol;Acc:MGI:1261831]	protein_coding	0.199466	1.96027	0.347637	0.716612	0.597921	0.737794	0.195808	0.714464	0.912034	2.20496	2.60422	5.53093	0.0143154	-0.0101016	-0.00405268	-0.380405	0.424767	0.291014
ENSMUSG00000006931	P3h4	11	-	100408456	100414836	prolyl 3-hydroxylase family member 4 (non-enzymatic) [Source:MGI Symbol;Acc:MGI:1913430]	protein_coding	0.501546	-0.00947143	0.44797	0.770961	1.22152	1.02838	0.182349	0.553989	0.526571	2.52806	3.16813	1.44508	0.30357	2.37304	-0.00599802	-0.0155074	1.00307	0.0322022
ENSMUSG00000006932	Ctnnb1	9	+	120929216	120960507	catenin (cadherin associated protein), beta 1 [Source:MGI Symbol;Acc:MGI:88276]	protein_coding	18.8426	13.2699	10.3185	114.769	40.8235	5.44058	49.2786	4.75081	1.36593	6.97419	128.827	8.4485	262.357	148.986	152.07	33.1458	3.40247	3.59585
ENSMUSG00000006941	Eif1b	9	+	120492232	120495330	eukaryotic translation initiation factor 1B [Source:MGI Symbol;Acc:MGI:1916219]	protein_coding	2.90345	22.2076	2.0396	124.182	28.8217	15.108	8.2133	13.2302	1.89441	-0.149736	9.00474	15.6945	34.4446	26.6212	59.5226	16.9992	2.31205	25.794
ENSMUSG00000006948	Klk4	7	+	43881160	43885804	kallikrein related-peptidase 4 (prostase, enamel matrix, prostate) [Source:MGI Symbol;Acc:MGI:1861379]	protein_coding	0.0846594	-0.0269298	-0.0525367	0.0968943	0.342937	0.789011	0.06669	-0.164976	0.518146	0.459447	0.510431	1.54341	0.00639452	-0.00466851	0.674956	-0.169161	0.214287	0.0912941
ENSMUSG00000006958	Chrd	16	+	20733127	20742384	chordin [Source:MGI Symbol;Acc:MGI:1313268]	protein_coding	0.443207	0.634678	0.60048	0.764582	0.510821	1.56317	0.0785636	1.5632	0.535494	4.02756	6.2679	5.184	0.0818499	-0.0230602	-0.00578509	-0.326764	0.587172	0.222768
ENSMUSG00000006998	Psmd2	16	+	20651652	20663414	proteasome (prosome, macropain) 26S subunit, non-ATPase, 2 [Source:MGI Symbol;Acc:MGI:1096584]	protein_coding	3.00711	334.041	9.20743	81.7887	16.7036	20.3567	11.4188	2.63367	2.60042	94.7193	13.7342	15.6131	138.234	83.0747	89.3954	17.3106	8.62348	2.19392
ENSMUSG00000007021	Syngr3	17	-	24685092	24689955	synaptogyrin 3 [Source:MGI Symbol;Acc:MGI:1341881]	protein_coding	1.04684	1.23262	1.67384	0.378628	0.119416	0.736696	0.0669885	0.923501	0.628516	1.49645	4.44164	1.78181	0.0357065	-0.0277134	0.559521	0.012971	1.03924	0.146767
ENSMUSG00000007029	Vars	17	+	35000987	35016322	valyl-tRNA synthetase [Source:MGI Symbol;Acc:MGI:90675]	protein_coding	2.43653	0.128988	3.27731	2.76124	9.64629	4.55389	9.30641	1.71301	3.66008	4.92078	13.9712	12.3503	0.445819	14.7015	4.41652	4.82396	5.28275	-0.109312
ENSMUSG00000007030	Vwa7	17	+	35016579	35026741	von Willebrand factor A domain containing 7 [Source:MGI Symbol;Acc:MGI:1306798]	protein_coding	3.93233	-0.0774234	1.52866	0.330056	0.298343	1.024	0.234358	0.647038	0.151719	1.90152	3.49588	3.78845	0.0030401	-0.000873327	-0.00215945	-0.331579	0.312055	0.293361
ENSMUSG00000007033	Hspa1l	17	+	34972703	34979285	heat shock protein 1-like [Source:MGI Symbol;Acc:MGI:96231]	protein_coding	0.0765729	-0.0211832	-0.0510242	0.396195	0.037639	0.544337	0.0515265	0.334737	0.106206	1.33054	0.610204	1.44147	0.00581666	-0.00431717	-0.0014722	-0.141581	0.356957	0.139388
ENSMUSG00000007034	Slc44a4	17	+	34914466	34930436	solute carrier family 44, member 4 [Source:MGI Symbol;Acc:MGI:1917379]	protein_coding	0.114593	-0.121752	0.21287	0.607475	0.753753	0.388928	0.374212	0.487998	0.308778	2.79349	2.31466	2.74147	0.0443638	-0.00408068	-0.00406317	0.929172	0.302526	0.513715
ENSMUSG00000007035	Msh5	17	-	35028605	35046745	mutS homolog 5 [Source:MGI Symbol;Acc:MGI:1329021]	protein_coding	-0.0557306	3.13222	1.59985	1.01357	0.517238	0.768282	0.597828	0.463596	1.12415	2.59856	7.16408	2.82254	0.215108	0.462011	-0.00241583	1.86467	0.642786	0.780637
ENSMUSG00000007036	Abhd16a	17	+	35089263	35102987	abhydrolase domain containing 16A [Source:MGI Symbol;Acc:MGI:99476]	protein_coding	2.95873	15.9818	3.65896	3.07435	12.2023	36.2488	5.39969	3.12351	2.75099	139.379	9.8959	11.5551	3.11457	2.99422	4.83963	-0.0611613	2.69912	-0.253777
ENSMUSG00000007038	Neu1	17	+	34931253	34935953	neuraminidase 1 [Source:MGI Symbol;Acc:MGI:97305]	protein_coding	9.13885	8.19499	5.44299	6.63429	2.66716	4.05271	9.87461	1.81229	1.22286	3.02486	6.17189	5.05177	8.28777	10.1953	14.956	0.821165	1.93827	0.0909557
ENSMUSG00000007039	Ddah2	17	+	35059035	35062095	dimethylarginine dimethylaminohydrolase 2 [Source:MGI Symbol;Acc:MGI:1859016]	protein_coding	1.37705	0.217084	5.11254	78.6583	1.60905	2.48469	12.2746	-0.107639	1.1412	2.27874	3.12946	4.19992	7.09254	2.99	4.37195	9.10012	1.72891	-0.464184
ENSMUSG00000007041	Clic1	17	+	35049966	35058749	chloride intracellular channel 1 [Source:MGI Symbol;Acc:MGI:2148924]	protein_coding	15.6507	24.8841	60.4024	5.50603	218.156	226.027	72.0593	596.219	231.941	109.785	26.6484	46.9426	122.133	90.1943	162.13	54.3548	1259.66	38.0848
ENSMUSG00000007050	Lsm2	17	+	34981862	34985891	LSM2 homolog, U6 small nuclear RNA and mRNA degradation associated [Source:MGI Symbol;Acc:MGI:90676]	protein_coding	53.1524	9.26474	2.49181	1.7682	21.2958	12.4217	58.77	15.6123	5.61468	7.22199	600.813	9.22303	131.849	94.8045	147.111	8.03322	5.60278	46.0539
ENSMUSG00000007080	Pole	5	+	110286306	110337474	polymerase (DNA directed), epsilon [Source:MGI Symbol;Acc:MGI:1196391]	protein_coding	2.74965	6.1908	4.80631	1.71894	2.27654	1.8587	0.899779	0.72322	0.77986	9.30875	4.71999	4.16901	5.42086	5.88385	7.58796	7.26378	1.82105	2.04015
ENSMUSG00000007097	Atp1a2	1	-	172271709	172298064	ATPase, Na+/K+ transporting, alpha 2 polypeptide [Source:MGI Symbol;Acc:MGI:88106]	protein_coding	-0.12424	1.25388	0.809998	0.306171	0.353557	1.5732	0.344908	0.524783	0.00979585	1.62674	3.2283	2.54116	0.0156316	1.97437	-0.000369931	0.202807	35.717	0.484688
ENSMUSG00000007107	Atp1a4	1	-	172223513	172258414	ATPase, Na+/K+ transporting, alpha 4 polypeptide [Source:MGI Symbol;Acc:MGI:1351335]	protein_coding	0.142302	2.63599	0.682304	0.224348	0.116794	0.900063	0.204438	0.375098	0.31103	1.85606	2.8996	3.26096	0.010368	-0.00688911	-0.00339585	-0.364262	0.347629	0.279296
ENSMUSG00000007122	Casq1	1	-	172209894	172219868	calsequestrin 1 [Source:MGI Symbol;Acc:MGI:1309468]	protein_coding	0.419461	0.00739331	1.60092	0.549807	0.0524708	1.5122	-0.0314437	0.99251	0.412581	2.03894	2.64108	2.37822	0.0898268	-0.0227951	0.0390046	-0.198332	0.275598	0.0300225
ENSMUSG00000007207	Stx1a	5	+	135023482	135051100	syntaxin 1A (brain) [Source:MGI Symbol;Acc:MGI:109355]	protein_coding	0.291612	-0.0448867	0.481436	0.676697	0.3143	1.16466	0.109554	-0.0466532	0.37067	2.3369	2.79105	2.20846	0.461702	-0.0155378	-0.00455039	-0.13607	0.285558	0.24324
ENSMUSG00000007209	Ceacam9	7	+	16721929	16726132	carcinoembryonic antigen-related cell adhesion molecule 9 [Source:MGI Symbol;Acc:MGI:1347247]	protein_coding	-0.0981108	-0.147759	0.301022	0.208072	0.179049	0.494823	0.492914	-0.388861	0.13073	2.31751	1.57066	0.994342	-0.00878778	0.0104972	-0.0016146	3.79217	0.166226	0.748445
ENSMUSG00000007216	Zfp775	6	+	48602063	48623227	zinc finger protein 775 [Source:MGI Symbol;Acc:MGI:2683557]	protein_coding	3.17176	-0.0764407	1.81731	0.600471	0.579833	1.69827	0.214591	0.388608	0.519401	2.96535	2.99334	3.32264	0.00562463	-0.00300064	-0.00260033	-0.343871	0.76408	0.289112
ENSMUSG00000007279	Scube2	7	-	109798676	109865679	signal peptide, CUB domain, EGF-like 2 [Source:MGI Symbol;Acc:MGI:1928765]	protein_coding	0.304274	-0.0381765	0.948039	0.457987	0.467938	0.448919	0.0900323	0.504341	0.598644	2.19187	5.08857	3.44442	0.0212468	-0.0163244	-0.00455471	-1.60844e-05	0.750721	0.213249
ENSMUSG00000007338	Mrpl49	19	-	6053622	6057785	mitochondrial ribosomal protein L49 [Source:MGI Symbol;Acc:MGI:108180]	protein_coding	1.57693	4.06586	2.16647	1.19569	6.58174	5.65794	-0.153267	1.7069	3.98268	3.26117	2.76061	5.50096	51.8524	19.7129	27.8531	-0.361326	0.843536	1.89448
ENSMUSG00000007379	Dennd2c	3	+	103102604	103169769	DENN/MADD domain containing 2C [Source:MGI Symbol;Acc:MGI:3036254]	protein_coding	4.70656	6.30057	6.26025	1.01039	0.685231	1.57536	0.621614	0.52266	0.485809	6.26942	3.04119	3.52091	3.47017	1.26345	-0.00392834	2.90853	0.879145	1.26558
ENSMUSG00000007411	Mark3	12	+	111574523	111656221	MAP/microtubule affinity regulating kinase 3 [Source:MGI Symbol;Acc:MGI:1341865]	protein_coding	41.4543	6.43179	15.3843	3.57174	23.3206	3.50738	62.8733	1.18574	1.17004	6.6517	12.8134	8.3875	20.7794	15.1292	25.5256	68.0338	2.6445	1.60822
ENSMUSG00000007415	Gatad1	5	-	3632932	3657185	GATA zinc finger domain containing 1 [Source:MGI Symbol;Acc:MGI:1914460]	protein_coding	2.13525	18.1912	0.0759923	80.4697	6.24242	20.16	14.0107	3.68292	1.61787	3.73256	5.90851	7.93336	33.4347	32.9919	30.2154	6.24171	2.15113	14.6514
ENSMUSG00000007440	Pcdha11	18	+	37005203	37187657	protocadherin alpha 11 [Source:MGI Symbol;Acc:MGI:1298372]	protein_coding	0.176336	0.377463	0.730175	0.417858	0.207281	0.296177	0.100276	-0.0971478	0.23954	1.1757	1.66541	0.690222	0.0128709	-0.00961665	0.833485	0.730635	0.193002	0.140614
ENSMUSG00000007457	2310003L06Rik	5	+	87969459	87972870	RIKEN cDNA 2310003L06 gene [Source:MGI Symbol;Acc:MGI:1921498]	protein_coding	8.36818	5.70826	1.27199	0.161969	0.204658	0.522004	0.751966	1.38656	-0.0173142	1.67044	0.788374	1.97858	-0.0265405	0.0266589	0.00058944	-0.334196	0.0681442	1.34483
ENSMUSG00000007458	M6pr	6	+	122308720	122317680	mannose-6-phosphate receptor, cation dependent [Source:MGI Symbol;Acc:MGI:96904]	protein_coding	22.5985	19.6779	16.9992	279.704	16.705	152.659	22.0668	9.71128	2.88453	53.6549	16.436	17.311	177.693	76.7805	77.1904	24.1667	3.73106	48.353
ENSMUSG00000007476	Lrrc8a	2	+	30237715	30263790	leucine rich repeat containing 8A VRAC subunit A [Source:MGI Symbol;Acc:MGI:2652847]	protein_coding	2.4134	4.91646	0.85328	12.7734	0.192482	0.818899	28.8771	4.21352	10.4837	0.814556	1.33261	7.93801	1.9388	6.69332	2.80966	6.64876	0.0091574	0.370621
ENSMUSG00000007480	Mc5r	18	+	68337596	68342446	melanocortin 5 receptor [Source:MGI Symbol;Acc:MGI:99420]	protein_coding	0.302532	3.58663	0.989023	0.715542	0.592803	0.531485	0.194955	0.53771	0.469558	2.04083	1.37047	1.50843	0.0209967	2.03979	-0.00524926	0.550613	0.47863	0.345106
ENSMUSG00000007564	Ppp2r1a	17	+	20945311	20965916	protein phosphatase 2, regulatory subunit A, alpha [Source:MGI Symbol;Acc:MGI:1926334]	protein_coding	14.0889	2.60566	14.4504	1.85414	17.711	18.9427	39.5843	5.06198	9.87812	14.8393	41.8554	12.9081	58.0782	29.9949	28.4066	3.93707	8.90991	-0.300995
ENSMUSG00000007570	Fance	17	+	28313519	28326572	Fanconi anemia, complementation group E [Source:MGI Symbol;Acc:MGI:1920025]	protein_coding	0.254783	-0.113663	1.08379	9.12971	1.91774	1.20833	0.337107	0.121377	0.580041	4.88166	7.49412	8.89465	5.82742	3.72575	1.08142	2.04557	1.53627	0.470649
ENSMUSG00000007589	Tinf2	14	-	55674689	55681820	Terf1 (TRF1)-interacting nuclear factor 2 [Source:MGI Symbol;Acc:MGI:107246]	protein_coding	2.69877	0.309717	1.15379	7.35622	26.4456	14.9214	-0.311742	1.6136	3.06915	2.73709	6.07034	9.0306	8.32137	13.1013	3.9398	1.93037	1.55173	12.1502
ENSMUSG00000007591	Tssk4	14	+	55650184	55652539	testis-specific serine kinase 4 [Source:MGI Symbol;Acc:MGI:1918349]	protein_coding	0.271479	5.06748	1.02931	0.455441	0.0811812	0.214132	0.0742882	0.335751	0.327269	3.16846	3.92641	3.25195	0.0192002	-0.0148287	-0.00407011	-0.278066	0.380325	0.375696
ENSMUSG00000007594	Hapln4	8	+	70083457	70090862	hyaluronan and proteoglycan link protein 4 [Source:MGI Symbol;Acc:MGI:2679531]	protein_coding	0.256425	0.139737	-0.15161	0.469953	0.416324	1.0788	0.22496	-0.368008	0.412054	3.31135	2.2532	3.65319	0.0181146	-0.0133507	-0.00450173	0.471494	0.292799	0.22689
ENSMUSG00000007603	Dus3l	17	+	56764757	56770093	dihydrouridine synthase 3-like (S. cerevisiae) [Source:MGI Symbol;Acc:MGI:2147092]	protein_coding	0.918913	0.111712	2.71545	0.682577	2.48754	2.76683	-0.112593	-0.214464	0.830555	3.25651	3.99331	4.84883	10.8461	6.45932	5.31492	0.0147716	1.38215	-0.195422
ENSMUSG00000007610	Gtpbp3	8	+	71488103	71499583	GTP binding protein 3 [Source:MGI Symbol;Acc:MGI:1917609]	protein_coding	0.708797	0.0383242	1.72159	0.662609	0.967031	1.04883	-0.0555933	1.41607	0.642197	3.64881	5.81174	2.85865	0.0437689	5.12909	6.20051	-0.194612	0.803839	0.0569242
ENSMUSG00000007613	Tgfbr1	4	+	47353222	47414931	transforming growth factor, beta receptor I [Source:MGI Symbol;Acc:MGI:98728]	protein_coding	5.53738	3.77149	1.10319	3.36095	3.09536	2.50457	17.1429	1.88376	1.14041	6.02846	6.57902	6.50275	0.903889	5.99581	8.02367	1.53425	0.679034	-0.121404
ENSMUSG00000007617	Homer1	13	+	93299635	93405129	homer scaffolding protein 1 [Source:MGI Symbol;Acc:MGI:1347345]	protein_coding	11.5278	1.89496	7.9306	1.14661	3.02199	2.08677	0.675801	0.944544	0.484782	9.21721	5.37046	5.85905	3.74834	1.62804	4.63969	2.04285	1.40743	0.993648
ENSMUSG00000007646	Rad51c	11	-	87376645	87404954	RAD51 paralog C [Source:MGI Symbol;Acc:MGI:2150020]	protein_coding	5.59169	-0.0030716	2.59095	0.655466	0.651597	1.10951	6.08695	0.203027	0.676655	2.59048	3.13655	3.12049	2.58283	4.53828	-0.00730603	1.19114	0.854437	0.0115422
ENSMUSG00000007653	Gabrb2	11	+	42419757	42629028	gamma-aminobutyric acid (GABA) A receptor, subunit beta 2 [Source:MGI Symbol;Acc:MGI:95620]	protein_coding	6.29289	2.45135	3.49201	0.61705	0.615477	0.509236	0.647644	0.50366	0.243039	3.37761	2.84179	3.33667	-0.0106758	0.0122421	-0.00143347	1.01291	0.211613	0.760098
ENSMUSG00000007655	Cav1	6	+	17306335	17341452	caveolin 1, caveolae protein [Source:MGI Symbol;Acc:MGI:102709]	protein_coding	0.936748	7.37589	10.087	1.80429	1.3671	2.14908	0.208441	-0.206547	1.33152	5.39711	12.8394	0.929461	0.574001	-0.0428575	0.0577075	2.63152	5.69992	-0.0787227
ENSMUSG00000007656	Arpp19	9	+	75037614	75060313	cAMP-regulated phosphoprotein 19 [Source:MGI Symbol;Acc:MGI:1891691]	protein_coding	25.6208	54.3583	25.5411	197.856	22.8536	485.931	267.016	145.969	1194.66	129.981	188.837	188.458	147.382	120.12	156.682	29.231	3.71571	65.0822
ENSMUSG00000007659	Bcl2l1	2	-	152780668	152831728	BCL2-like 1 [Source:MGI Symbol;Acc:MGI:88139]	protein_coding	8.25541	13.5939	22.9316	31.7648	12.0712	35.2514	106.442	8.70848	300.021	11.1431	17.6696	14.4842	33.5925	13.1956	26.6803	2.22815	2.25783	-0.00284639
ENSMUSG00000007670	Khsrp	17	-	57021051	57031522	KH-type splicing regulatory protein [Source:MGI Symbol;Acc:MGI:1336214]	protein_coding	14.5049	62.382	13.0638	36.1857	34.0062	15.7131	27.1712	16.5746	17.1452	5.78456	30.5231	9.3559	35.3232	41.2712	33.9579	49.5084	39.3878	26.5728
ENSMUSG00000007682	Dio2	12	-	90724552	90738438	deiodinase, iodothyronine, type II [Source:MGI Symbol;Acc:MGI:1338833]	protein_coding	0.186765	1.71012	0.997337	0.531974	0.17739	0.43953	0.25604	0.298345	0.433807	2.01751	2.35408	0.999244	0.0133809	0.123284	2.18228	0.988568	0.368017	0.388858
ENSMUSG00000007721	Ccdc124	8	-	70868227	70873935	coiled-coil domain containing 124 [Source:MGI Symbol;Acc:MGI:1916403]	protein_coding	7.73454	0.674392	0.973511	38.916	12.1843	5.54295	13.1396	11.7004	7.43694	5.01442	7.60511	13.6677	52.4592	46.1251	35.5616	9.81273	3.414	23.6668
ENSMUSG00000007739	Cct4	11	+	22990519	23003780	chaperonin containing Tcp1, subunit 4 (delta) [Source:MGI Symbol;Acc:MGI:104689]	protein_coding	53.8169	10.4414	35.2917	13.0343	26.1552	55.5485	84.7069	14.7944	497.908	13.9088	21.4457	20.4432	101.065	99.7182	72.7451	14.6924	6.46485	21.656
ENSMUSG00000007777	0610009B22Rik	11	-	51685386	51688874	RIKEN cDNA 0610009B22 gene [Source:MGI Symbol;Acc:MGI:1913300]	protein_coding	5.57317	0.73736	0.0581993	0.78949	29.4134	51.8936	32.7142	10.7581	5.21393	14.663	9.40449	7.99452	52.1461	71.9385	39.3162	24.3412	4.95122	6.72397
ENSMUSG00000007783	Cpt1c	7	-	44959372	44974851	carnitine palmitoyltransferase 1c [Source:MGI Symbol;Acc:MGI:2446526]	protein_coding	1.42022	2.68884	2.09181	1.2583	1.0823	1.18422	0.140577	1.04666	0.665217	4.53822	4.20172	3.49007	1.57094	0.576113	0.739954	0.302539	0.568141	0.44261
ENSMUSG00000007805	Twist2	1	+	91801461	91848028	twist basic helix-loop-helix transcription factor 2 [Source:MGI Symbol;Acc:MGI:104685]	protein_coding	0.893148	1.65233	2.33654	0.808815	0.364944	0.60632	-0.0353453	0.255383	0.911155	1.45398	1.70142	3.66383	0.052216	-0.0351489	-0.00718738	-0.342834	0.701502	-0.00567155
ENSMUSG00000007812	Zfp655	5	+	145231715	145247302	zinc finger protein 655 [Source:MGI Symbol;Acc:MGI:1919861]	protein_coding	17.4905	5.36739	5.00824	1.65598	3.61177	17.7128	42.2648	2.45275	1.92367	5.31767	4.77702	6.3822	9.93946	9.05554	2.67288	6.42484	2.35384	17.734
ENSMUSG00000007815	Rhoa	9	+	108306129	108337934	ras homolog family member A [Source:MGI Symbol;Acc:MGI:1096342]	protein_coding	123.371	21.8533	102.143	53.2365	30.6778	120.17	136.979	39.9657	669.331	6.00067	199.229	42.7482	93.5489	92.9801	169.348	30.3812	421.282	67.8545
ENSMUSG00000007817	Zmiz1	14	+	25459185	25666743	zinc finger, MIZ-type containing 1 [Source:MGI Symbol;Acc:MGI:3040693]	protein_coding	6.21887	11.7924	2.82315	39.9074	2.29549	26.9591	24.1003	4.33929	10.7387	28.0519	118.423	14.5854	15.2699	16.4633	9.43119	6.46996	1.28717	15.908
ENSMUSG00000007827	Ankrd26	6	-	118501308	118562226	ankyrin repeat domain 26 [Source:MGI Symbol;Acc:MGI:1917887]	protein_coding	3.45126	1.97147	1.69552	1.00681	1.50187	1.54574	0.435244	0.66463	0.251583	3.10631	2.42894	2.55943	2.4222	3.73108	1.80157	0.652184	0.565671	0.734484
ENSMUSG00000007833	Aldh16a1	7	-	45140684	45154584	aldehyde dehydrogenase 16 family, member A1 [Source:MGI Symbol;Acc:MGI:1916998]	protein_coding	5.76522	3.87372	14.1156	1.36749	1.88379	2.24284	0.828158	4.07666	0.637891	5.82487	1.82475	7.86997	20.8948	23.2295	9.25766	2.02928	1.18365	-0.225419
ENSMUSG00000007836	Hnrnpa0	13	-	58125879	58128556	heterogeneous nuclear ribonucleoprotein A0 [Source:MGI Symbol;Acc:MGI:1924384]	protein_coding	1.41984	8.57751	3.38286	55.1894	10.1332	2.65282	0.860622	2.89757	3.47005	6.32997	4.32409	17.8876	74.3671	84.6325	84.9957	0.690207	1.37881	2.45283
ENSMUSG00000007837	Prrg2	7	-	45053584	45062677	proline-rich Gla (G-carboxyglutamic acid) polypeptide 2 [Source:MGI Symbol;Acc:MGI:1929596]	protein_coding	0.831228	-0.0378206	1.8805	2.01354	1.19703	0.988466	0.0747027	1.7924	1.18337	5.1981	1.84275	3.80438	0.139447	0.168129	-0.00938196	2.53919	2.20958	0.133138
ENSMUSG00000007850	Hnrnph1	11	+	50376990	50386528	heterogeneous nuclear ribonucleoprotein H1 [Source:MGI Symbol;Acc:MGI:1891925]	protein_coding	14.3686	9.44643	6.8836	224.287	35.1362	22.3813	52.3012	29.1747	87.7766	167.209	15.2198	15.1178	157.602	359.569	224.523	30.6018	3.67389	37.9384
ENSMUSG00000007867	Ift43	12	+	86082541	86162459	intraflagellar transport 43 [Source:MGI Symbol;Acc:MGI:1923661]	protein_coding	1.48136	0.104007	1.92099	0.487945	3.74957	1.47886	-0.24495	-0.40385	1.22161	3.65349	6.5834	5.72729	0.280595	8.1404	-0.0110596	-0.185087	0.677635	-0.268539
ENSMUSG00000007872	Id3	4	+	136143497	136145755	inhibitor of DNA binding 3 [Source:MGI Symbol;Acc:MGI:96398]	protein_coding	1.67378	3.08843	3.45343	1.52952	18.53	1.81461	0.452634	1.1981	1.97368	20.341	4.9189	4.69858	0.0816043	4.70375	0.362105	3.78274	5.18409	-0.0550188
ENSMUSG00000007877	Tcap	11	+	98383811	98384953	titin-cap [Source:MGI Symbol;Acc:MGI:1330233]	protein_coding	0.183299	-0.0366543	-0.12275	0.439767	0.830781	4.14297	0.396353	0.519165	0.419241	4.71288	6.19894	5.87343	0.0133614	-0.0100838	-0.00313308	-0.255555	0.597207	0.32247
ENSMUSG00000007880	Arid1a	4	-	133679008	133756769	AT rich interactive domain 1A (SWI-like) [Source:MGI Symbol;Acc:MGI:1935147]	protein_coding	9.34202	1.54066	8.85462	41.6752	13.5865	9.61459	47.2235	8.7408	29.4738	1.71819	4.37916	10.9619	34.8006	31.0431	40.9332	11.9515	21.3804	7.90133
ENSMUSG00000007888	Crlf1	8	+	70493158	70504081	cytokine receptor-like factor 1 [Source:MGI Symbol;Acc:MGI:1340030]	protein_coding	0.515144	1.67237	1.29432	0.459242	1.00899	1.01319	-0.0793654	0.320564	0.47343	2.46178	1.42412	3.03772	0.0337702	-0.0273884	-0.00542727	-0.163737	0.300736	-0.080677
ENSMUSG00000007891	Ctsd	7	-	142375911	142388038	cathepsin D [Source:MGI Symbol;Acc:MGI:88562]	protein_coding	95.6407	57.4245	48.119	92.7617	43.2177	78.0022	72.4183	109.563	193.691	201.98	36.612	60.7224	40.8439	60.9604	72.2804	48.9475	33.9606	114.109
ENSMUSG00000007892	Rplp1	9	-	61913284	61914542	ribosomal protein, large, P1 [Source:MGI Symbol;Acc:MGI:1927099]	protein_coding	168.735	150.349	247.898	814.172	948.095	968.39	564.061	141.524	1370.5	818.689	728.24	485.94	4575.98	5072.04	3702.97	333.48	38.0054	205.011
ENSMUSG00000007907	Cabs1	5	+	87979439	87981544	calcium binding protein, spermatid specific 1 [Source:MGI Symbol;Acc:MGI:1918227]	protein_coding	0.550911	-0.0138963	0.759822	0.966305	0.0947687	0.331926	0.0177465	1.58911	0.586058	2.45521	0.637567	1.39647	0.0355363	-0.0279544	-0.00654537	-0.319042	0.402378	0.0471634
ENSMUSG00000007908	Hmgcll1	9	+	76014855	76136350	3-hydroxymethyl-3-methylglutaryl-Coenzyme A lyase-like 1 [Source:MGI Symbol;Acc:MGI:2446108]	protein_coding	5.4506	8.88473	4.7618	0.527993	0.558296	1.31709	0.515305	1.12739	0.581993	3.42114	3.39155	2.93633	0.0302097	0.478627	-0.00247933	0.147716	0.571261	0.784805
ENSMUSG00000007944	Ttc9b	7	+	27653915	27657346	tetratricopeptide repeat domain 9B [Source:MGI Symbol;Acc:MGI:1920282]	protein_coding	0.0804638	-0.037733	-0.0381792	0.400237	0.967523	0.587144	0.0968164	0.193732	0.365914	1.31087	2.90166	1.19322	0.00604176	2.01966	-0.00185367	-0.208703	0.117518	0.303209
ENSMUSG00000007946	Phox2a	7	+	101818313	101822726	paired-like homeobox 2a [Source:MGI Symbol;Acc:MGI:106633]	protein_coding	0.251407	4.01794	0.148729	0.356126	0.314378	1.97934	0.0994474	-0.311315	0.782485	1.23034	3.64436	3.06376	0.017874	-0.0135969	-0.00401793	-0.299658	1.02209	2.03894
ENSMUSG00000007950	Abhd8	8	-	71456705	71463655	abhydrolase domain containing 8 [Source:MGI Symbol;Acc:MGI:1918946]	protein_coding	2.95972	2.08008	5.43959	1.58876	6.91411	1.92521	0.162832	1.01344	1.47369	10.5712	4.75069	4.12034	0.116151	-0.0352803	-0.0095471	2.61774	1.66044	0.579511
ENSMUSG00000007987	Ift22	5	+	136908150	136915404	intraflagellar transport 22 [Source:MGI Symbol;Acc:MGI:1914536]	protein_coding	8.05202	-0.148078	2.67199	0.757169	2.18026	2.1057	0.500716	2.55933	0.072375	5.43262	1.78828	4.43756	7.0282	1.51085	1.88281	0.296481	2.68355	0.666314
ENSMUSG00000007989	Fzd3	14	-	65192449	65262463	frizzled class receptor 3 [Source:MGI Symbol;Acc:MGI:108476]	protein_coding	2.9999	2.10076	1.22434	0.511864	0.643787	0.902545	0.452165	0.664731	0.142241	2.44225	2.68429	2.19559	0.344804	0.125363	0.132512	-0.17087	0.376905	0.680668
ENSMUSG00000008028	1700008O03Rik	7	-	44360043	44385820	RIKEN cDNA 1700008O03 gene [Source:MGI Symbol;Acc:MGI:1916599]	protein_coding	0.445687	4.71236	1.06714	0.55645	0.655108	1.99319	0.0496588	0.00294279	0.497907	2.04838	6.88705	2.98743	0.029711	-0.0232257	-0.00576193	-0.319874	0.354519	0.0854883
ENSMUSG00000008035	Mid1ip1	X	+	10715013	10719690	Mid1 interacting protein 1 (gastrulation specific G12-like (zebrafish)) [Source:MGI Symbol;Acc:MGI:1915291]	protein_coding	17.1742	0.527591	2.4803	45.8752	6.85601	3.95554	0.44895	7.91649	0.805373	1.87805	5.07243	10.319	67.8696	34.6592	31.7474	2.50513	0.548174	31.7285
ENSMUSG00000008036	Ap2s1	7	+	16738410	16749294	adaptor-related protein complex 2, sigma 1 subunit [Source:MGI Symbol;Acc:MGI:2141861]	protein_coding	10.0285	0.854579	2.59274	240.852	15.1818	20.206	41.6057	18.3747	4.31855	157.396	17.4684	15.8904	227.156	135.865	141.365	41.4976	9.09342	18.6975
ENSMUSG00000008090	Fgfrl1	5	+	108692382	108706924	fibroblast growth factor receptor-like 1 [Source:MGI Symbol;Acc:MGI:2150920]	protein_coding	0.905788	1.82524	0.11684	1.41719	1.95119	2.17467	0.417867	1.22658	0.141526	4.51443	2.51692	5.70762	-0.000522481	0.00261804	0.139158	-0.395201	0.55258	0.78325
ENSMUSG00000008129	4930432K21Rik	8	+	84148025	84172590	RIKEN cDNA 4930432K21 gene [Source:MGI Symbol;Acc:MGI:1921916]	protein_coding	3.65443	0.0798207	2.00125	0.374084	0.848752	0.925136	0.0688177	0.411733	0.0547335	1.77801	2.11237	2.43268	0.220489	0.078497	0.0740141	-0.0985215	0.10243	0.292931
ENSMUSG00000008136	Fhl2	1	-	43123074	43196984	four and a half LIM domains 2 [Source:MGI Symbol;Acc:MGI:1338762]	protein_coding	22.7497	0.231982	6.60568	1.06468	1.05309	94.9232	-0.0161814	0.780322	0.944443	103.599	5.39131	2.96213	5.26572	6.6767	-0.00772671	-0.330104	1.70376	0.00782544
ENSMUSG00000008140	Emc10	7	-	44489937	44496529	ER membrane protein complex subunit 10 [Source:MGI Symbol;Acc:MGI:1916933]	protein_coding	3.30083	1.90291	2.71588	1.17896	7.49109	5.24821	8.46083	2.43842	2.67669	13.3498	23.9652	7.81782	23.7197	42.5209	46.9924	2.81233	4.03834	0.56008
ENSMUSG00000008153	Clstn3	6	-	124430581	124464794	calsyntenin 3 [Source:MGI Symbol;Acc:MGI:2178323]	protein_coding	1.43989	1.27216	-0.347904	1.10095	1.2343	1.65951	-0.324438	3.80122	1.27435	3.60505	6.53486	10.6728	0.0743978	0.00891305	1.1424	0.210259	1.22243	44.4214
ENSMUSG00000008167	Fbxw9	8	+	85060055	85067124	F-box and WD-40 domain protein 9 [Source:MGI Symbol;Acc:MGI:1915878]	protein_coding	0.576335	2.05513	1.28207	1.00716	0.577636	1.19312	0.0858407	1.40869	0.93617	2.14707	4.13593	4.56726	0.149092	2.43063	2.47484	-0.404221	1.33952	0.240644
ENSMUSG00000008193	Spib	7	-	44525993	44532071	Spi-B transcription factor (Spi-1/PU.1 related) [Source:MGI Symbol;Acc:MGI:892986]	protein_coding	0.384433	2.11979	1.01205	0.186681	0.333643	0.15909	1.91921	0.285361	0.46114	3.09286	2.20255	2.94182	0.0263271	-0.0214175	2.4935	2.36347	0.477089	-0.0277946
ENSMUSG00000008200	Fnbp4	2	+	90745370	90781021	formin binding protein 4 [Source:MGI Symbol;Acc:MGI:1860513]	protein_coding	9.53994	7.14032	1.59181	0.808376	6.40599	3.77675	9.64093	6.1346	1.48429	6.20493	4.2605	14.9813	21.0552	15.5395	18.5278	5.63823	1.43783	15.4303
ENSMUSG00000008206	Cers4	8	+	4493026	4531680	ceramide synthase 4 [Source:MGI Symbol;Acc:MGI:1914510]	protein_coding	3.30426	3.52404	3.95158	5.45182	0.869687	2.25534	0.208884	1.30158	2.36833	3.29796	2.63135	2.91767	0.934545	4.46078	0.704181	3.96448	0.108283	4.73842
ENSMUSG00000008226	Scrn3	2	+	73312601	73337818	secernin 3 [Source:MGI Symbol;Acc:MGI:1921866]	protein_coding	0.849486	9.8218	4.33215	6.57972	2.28823	2.19061	0.291468	1.36879	1.30079	5.92861	4.97571	4.55486	0.529351	1.13052	0.0921395	0.0772851	1.03621	0.261142
ENSMUSG00000008301	Phax	18	+	56562443	56587712	phosphorylated adaptor for RNA export [Source:MGI Symbol;Acc:MGI:1891839]	protein_coding	1.68008	1.93778	6.29082	1.14202	9.40842	1.43699	0.0474571	2.45095	2.1961	4.56278	3.58503	2.30508	0.235119	22.5575	8.34481	2.29249	4.09081	-0.17979
ENSMUSG00000008305	Tle1	4	-	72117142	72200919	transducin-like enhancer of split 1 [Source:MGI Symbol;Acc:MGI:104636]	protein_coding	4.27173	5.22937	4.21142	18.7334	1.33988	1.83761	0.323536	1.83452	0.505714	5.28002	5.6406	3.53872	8.49568	2.62498	3.15479	0.535428	0.477205	1.78754
ENSMUSG00000008307	1700109H08Rik	5	+	3571566	3584356	RIKEN cDNA 1700109H08 gene [Source:MGI Symbol;Acc:MGI:1924286]	protein_coding	81.7803	3.4951	5.4861	0.398286	1.4296	0.952765	1.71652	0.721781	-0.448911	41.1664	3.7548	5.39943	0.605952	0.382198	0.518118	4.22708	0.0860186	2.55697
ENSMUSG00000008318	Relt	7	-	100845847	100863446	RELT tumor necrosis factor receptor [Source:MGI Symbol;Acc:MGI:2443373]	protein_coding	0.597328	2.05923	1.27626	1.06229	2.55362	2.50426	0.121223	1.81526	2.16549	50.6694	5.29904	10.0266	5.15344	7.02641	5.31071	0.521667	0.515916	0.306788
ENSMUSG00000008333	Snrpb2	2	+	143063039	143072853	U2 small nuclear ribonucleoprotein B [Source:MGI Symbol;Acc:MGI:104805]	protein_coding	4.75422	18.5197	13.122	236.651	12.5117	162.607	24.3802	7.26793	451.923	4.39903	10.2449	10.6035	162.22	142.047	126.495	8.05328	7.92305	18.4206
ENSMUSG00000008348	Ubc	5	-	125385965	125390202	ubiquitin C [Source:MGI Symbol;Acc:MGI:98889]	protein_coding	4.47935	18.6467	32.5565	70.0028	191.264	28.866	11.3868	3.36178	22.2239	10.5853	98.3932	20.0393	81.2764	101.692	69.5884	45.4106	20.5412	5.45391
ENSMUSG00000008373	Prpf31	7	+	3629985	3642486	pre-mRNA processing factor 31 [Source:MGI Symbol;Acc:MGI:1916238]	protein_coding	17.1252	3.94574	3.17846	0.42795	7.27298	4.67504	1.49937	4.93542	1.8736	5.99087	19.6338	9.64995	13.6929	16.8081	2.21005	13.8005	1.82911	55.3163
ENSMUSG00000008384	Sertad1	7	+	27486910	27490316	SERTA domain containing 1 [Source:MGI Symbol;Acc:MGI:1913438]	protein_coding	1.05002	0.156865	6.55048	90.4859	10.617	4.97029	-0.182339	0.924813	1.15546	3.17126	415.178	10.0431	22.813	24.1466	-0.00744786	0.1624	0.781337	-0.370325
ENSMUSG00000008393	Carhsp1	16	-	8658580	8672155	calcium regulated heat stable protein 1 [Source:MGI Symbol;Acc:MGI:1196368]	protein_coding	4.18219	12.2771	12.147	3.94316	8.05527	5.73141	21.9482	7.7701	27.676	2.45075	2.72818	10.6841	1.37123	9.51316	4.47158	12.5054	1.36356	-0.0187085
ENSMUSG00000008398	Elk3	10	-	93247414	93311135	ELK3, member of ETS oncogene family [Source:MGI Symbol;Acc:MGI:101762]	protein_coding	2.82161	1.45628	0.669954	0.980409	2.94595	1.76413	9.50539	22.7703	2.47346	2.26094	7.3951	3.57362	13.1074	10.3259	12.8765	3.48387	1.46346	6.02795
ENSMUSG00000008429	Herpud2	9	-	25108132	25151820	HERPUD family member 2 [Source:MGI Symbol;Acc:MGI:1915393]	protein_coding	13.7491	3.10618	9.25004	37.0662	7.09431	2.73591	5.98849	0.171248	0.476453	19.8504	3.86308	4.8301	12.7931	10.455	5.79056	6.58049	1.2343	-0.00655989
ENSMUSG00000008435	Rdh13	7	-	4424770	4445649	retinol dehydrogenase 13 (all-trans and 9-cis) [Source:MGI Symbol;Acc:MGI:1918732]	protein_coding	2.942	1.33669	2.29333	0.367451	1.35726	1.87059	0.441816	0.410106	0.366239	4.33472	4.28182	4.46499	1.53992	0.204515	4.57152	0.418527	0.461134	0.606864
ENSMUSG00000008438	Adam21	12	-	81558584	81568474	a disintegrin and metallopeptidase domain 21 [Source:MGI Symbol;Acc:MGI:1861229]	protein_coding	0.453135	-0.0425407	1.58595	0.574739	0.371552	0.615031	0.0977606	-0.304828	0.730884	1.54041	2.49291	1.69271	0.030063	-0.0231442	-0.00618452	1.56587	0.395304	0.227366
ENSMUSG00000008450	Nutf2	8	+	105860580	105879330	nuclear transport factor 2 [Source:MGI Symbol;Acc:MGI:1915301]	protein_coding	2.26092	21.8384	13.2961	2.62749	31.1566	13.3575	-0.207219	6.33573	2.80813	8.04453	8.53331	25.5028	2.2082	10.7564	22.6213	9.84065	5.46418	36.4272
ENSMUSG00000008461	Fut1	7	+	45617289	45621059	fucosyltransferase 1 [Source:MGI Symbol;Acc:MGI:109375]	protein_coding	0.251589	1.03243	1.13423	0.862985	0.549566	0.777304	0.527742	1.73936	0.492494	5.86242	2.17251	0.745433	0.0175073	-0.0113348	-0.00593859	2.25835	1.18965	0.570618
ENSMUSG00000008475	Arpc5	1	+	152766542	152775597	actin related protein 2/3 complex, subunit 5 [Source:MGI Symbol;Acc:MGI:1915021]	protein_coding	51.3135	81.9355	86.074	399.489	113.256	2279.54	343.69	149.698	828.006	110.564	33.8431	105.077	482.719	349.323	309.205	109.206	651.856	97.7382
ENSMUSG00000008482	Rnf151	17	-	24715839	24718063	ring finger protein 151 [Source:MGI Symbol;Acc:MGI:1914754]	protein_coding	0.496244	0.00626452	1.31748	0.265518	0.392191	1.36892	0.411083	0.301272	0.709047	1.62353	1.98186	5.09988	0.0326573	-0.026128	-0.00564401	-0.232492	0.327386	-0.0184325
ENSMUSG00000008489	Elavl2	4	-	91250763	91400785	ELAV like RNA binding protein 1 [Source:MGI Symbol;Acc:MGI:1100887]	protein_coding	37.2734	3.11705	9.36186	0.904391	5.26978	1.94044	1.36224	0.920283	0.173822	10.567	7.33757	5.95039	0.0990162	0.0786814	0.049077	2.60951	0.34613	1.7685
ENSMUSG00000008496	Pou2f2	7	-	25087344	25179726	POU domain, class 2, transcription factor 2 [Source:MGI Symbol;Acc:MGI:101897]	protein_coding	1.54397	1.56014	0.455838	3.58339	15.2889	4.32003	4.26359	1.13693	2.8186	4.0942	4.17326	8.20069	3.31536	1.92457	2.76632	1.71055	0.262876	4.40509
ENSMUSG00000008540	Mgst1	6	+	138140316	138156755	microsomal glutathione S-transferase 1 [Source:MGI Symbol;Acc:MGI:1913850]	protein_coding	64.3098	25.9751	2.97617	7.4203	13.6628	45.296	178.246	728.815	6.20251	15.1273	20.86	15.0019	345.626	263.321	266.79	17.9826	15.2522	73.1516
ENSMUSG00000008575	Nfib	4	-	82290173	82705750	nuclear factor I/B [Source:MGI Symbol;Acc:MGI:103188]	protein_coding	4.41776	4.65791	5.91316	1.81326	1.33634	1.40262	0.946795	0.0432323	0.45822	5.3548	4.45394	5.49571	0.588016	0.553131	0.214681	3.29983	0.604643	0.836986
ENSMUSG00000008590	Htr3b	9	-	48935008	48964990	5-hydroxytryptamine (serotonin) receptor 3B [Source:MGI Symbol;Acc:MGI:1861899]	protein_coding	0.344745	-0.0120565	0.751369	0.516441	0.430321	0.230789	0.0187067	-0.0519085	0.369744	1.74766	2.34036	1.82564	0.0238392	-0.0188943	-0.0044744	0.757214	0.261236	0.26496
ENSMUSG00000008601	Rab25	3	-	88542029	88548300	RAB25, member RAS oncogene family [Source:MGI Symbol;Acc:MGI:1858203]	protein_coding	0.320019	-0.0622827	0.140881	1.2517	0.34398	1.17888	0.160344	0.470787	0.433144	1.5202	4.16396	4.47854	0.0221268	-0.0165186	-0.00521533	-0.393064	0.340779	0.228854
ENSMUSG00000008604	Ubqln4	3	+	88553758	88569725	ubiquilin 4 [Source:MGI Symbol;Acc:MGI:2150152]	protein_coding	6.08051	1.42316	2.05011	0.912282	4.11163	14.1213	13.538	1.6113	0.842536	2.78563	3.79109	3.56616	2.73521	3.44672	8.05021	0.0716028	1.12202	-0.129099
ENSMUSG00000008658	Rbfox1	16	+	5885355	7411526	RNA binding protein, fox-1 homolog (C. elegans) 1 [Source:MGI Symbol;Acc:MGI:1926224]	protein_coding	9.35127	2.44792	3.88672	1.47254	0.951311	0.835733	0.778693	0.283529	0.0417268	5.86392	4.06653	4.25028	-0.025497	0.0260656	9.59752e-05	0.839254	0.384049	1.06219
ENSMUSG00000008668	Rps18	17	-	33951999	33956001	ribosomal protein S18 [Source:MGI Symbol;Acc:MGI:98146]	protein_coding	487.894	209.39	663.714	336.786	539.046	214.814	315.76	157.939	289.136	249.534	557.003	378.24	1130.64	1394.58	1042.65	509.119	96.33	148.632
ENSMUSG00000008682	Rpl10	X	+	74270812	74273135	ribosomal protein L10 [Source:MGI Symbol;Acc:MGI:105943]	protein_coding	68.2469	93.8315	156.613	338.189	269.351	376.937	178.747	420.197	212.073	861.487	1473.29	116.459	1212.49	1182.73	1010.8	190.357	332.68	131.586
ENSMUSG00000008683	Rps15a	7	-	118104372	118116188	ribosomal protein S15A [Source:MGI Symbol;Acc:MGI:2389091]	protein_coding	48.5994	18.9878	46.3774	106.399	84.5764	97.4597	116.678	53.5108	96.058	33.5037	115.432	43.974	280.206	346.914	379.716	72.1546	172.003	34.0536
ENSMUSG00000008690	Ncaph2	15	+	89355719	89372826	non-SMC condensin II complex, subunit H2 [Source:MGI Symbol;Acc:MGI:1289164]	protein_coding	3.85314	0.214552	3.73659	2.79099	8.43844	21.2389	10.3326	49.603	6.47651	86.654	368.308	11.5908	21.5367	125.419	27.3697	7.0607	6.31766	19.8494
ENSMUSG00000008730	Hipk1	3	-	103739815	103791563	homeodomain interacting protein kinase 1 [Source:MGI Symbol;Acc:MGI:1314873]	protein_coding	72.5041	44.1238	42.9751	38.0735	37.5858	20.3494	26.2556	32.608	16.571	34.2719	8.62292	10.4584	31.1207	28.6921	38.0243	98.1301	14.8162	37.4649
ENSMUSG00000008734	Gprc5b	7	-	118972047	118995211	G protein-coupled receptor, family C, group 5, member B [Source:MGI Symbol;Acc:MGI:1927596]	protein_coding	0.314923	-0.0143032	0.847142	0.419414	0.184906	0.690268	0.0253747	0.698063	0.45709	1.95054	1.94783	1.71365	0.167919	-0.0174038	0.0353473	-0.233523	0.64009	0.0745114
ENSMUSG00000008763	Man1a2	3	-	100562208	100685503	mannosidase, alpha, class 1A, member 2 [Source:MGI Symbol;Acc:MGI:104676]	protein_coding	7.09788	5.25262	2.6242	11.0201	2.82001	1.24677	19.7045	0.861885	0.220163	1.88314	2.2204	3.3222	0.947309	6.34234	1.58113	4.80197	0.68842	0.0539482
ENSMUSG00000008789	Ceacam5	7	+	17713238	17761132	carcinoembryonic antigen-related cell adhesion molecule 5 [Source:MGI Symbol;Acc:MGI:1920500]	protein_coding	-0.000222804	4.3572	0.108695	0.590367	0.124491	0.179541	0.366446	1.54876	0.134416	1.56533	1.46048	1.3766	-0.00040241	0.00239674	-0.0019894	-0.378469	0.288806	0.388879
ENSMUSG00000008813	Tppp2	14	+	51918425	51920700	tubulin polymerization-promoting protein family member 2 [Source:MGI Symbol;Acc:MGI:2684923]	protein_coding	-0.0227581	-0.0773744	0.109104	0.354621	0.0918659	0.595732	0.222268	0.626067	0.0784503	1.39323	1.70612	5.00853	-0.00213322	0.00337098	-0.00122906	-0.29906	0.103482	0.292867
ENSMUSG00000008822	Acyp1	12	-	85272398	85288438	acylphosphatase 1, erythrocyte (common) type [Source:MGI Symbol;Acc:MGI:1913454]	protein_coding	0.825132	1.7705	0.802014	0.526661	12.6916	5.05945	-0.283351	8.28808	2.78005	5.03178	8.17951	9.51091	26.981	117.81	79.5957	0.148608	0.293959	37.8531
ENSMUSG00000008843	Cldn13	5	-	134914249	134915526	claudin 13 [Source:MGI Symbol;Acc:MGI:1913102]	protein_coding	0.157017	-0.0341162	-0.105181	1.58432	18.0865	4.46377	0.254274	0.340169	0.416343	3.42078	1.96214	1.93891	0.0115592	-0.00869008	0.242664	-0.234022	0.168096	0.117648
ENSMUSG00000008845	Cd163	6	+	124304656	124330527	CD163 antigen [Source:MGI Symbol;Acc:MGI:2135946]	protein_coding	0.232101	0.00436473	0.797097	9.76875	0.601322	1.65822	0.0891025	2.04654	2.77558	2.12609	2.01443	4.90081	0.0167888	0.739678	0.798477	-0.123555	0.251831	2.02705
ENSMUSG00000008855	Hdac5	11	-	102194432	102230166	histone deacetylase 5 [Source:MGI Symbol;Acc:MGI:1333784]	protein_coding	5.55699	4.38705	2.25548	1.78246	1.67407	3.7891	0.110234	0.313435	1.13416	5.94286	10.5641	9.15541	0.674019	4.17088	4.34246	3.6184	2.14594	12.3807
ENSMUSG00000008859	Rala	13	-	17880571	17944239	v-ral simian leukemia viral oncogene A (ras related) [Source:MGI Symbol;Acc:MGI:1927243]	protein_coding	4.0745	6.58089	0.933555	0.387732	3.62955	4.81889	17.6307	2.08301	2.13274	40.4365	69.2462	7.78012	21.7856	7.87236	9.16239	12.8788	2.60835	10.2934
ENSMUSG00000008874	Clec3a	8	+	114418086	114425846	C-type lectin domain family 3, member a [Source:MGI Symbol;Acc:MGI:2685642]	protein_coding	2.05758	-0.0890847	0.2008	0.0968019	0.0953989	0.303643	0.264913	-0.227981	0.146357	4.09145	1.8958	3.37225	-0.00746755	0.0080487	-0.000520776	-0.306363	0.0708017	0.346352
ENSMUSG00000008892	Vdac3	8	-	22577075	22593813	voltage-dependent anion channel 3 [Source:MGI Symbol;Acc:MGI:106922]	protein_coding	59.1925	22.4735	23.9519	1.41588	19.4553	20.7309	49.0718	26.7664	742.217	8.69875	8.11895	28.5194	75.3843	61.5493	80.4233	27.3971	5.83129	50.3823
ENSMUSG00000008932	Slc1a7	4	+	107968332	108013532	solute carrier family 1 (glutamate transporter), member 7 [Source:MGI Symbol;Acc:MGI:2444087]	protein_coding	-0.0619747	3.42801	0.423452	0.434962	0.371945	0.666837	0.160568	-0.144936	0.171707	2.67617	2.54525	2.78587	0.0447561	0.0055597	-0.000225278	-0.202333	0.10311	0.30264
ENSMUSG00000008958	Vps72	3	+	95111022	95123051	vacuolar protein sorting 72 [Source:MGI Symbol;Acc:MGI:1202305]	protein_coding	12.1516	14.6271	15.5109	0.15775	8.49117	8.76518	26.3265	8.27947	0.119056	4.62524	5.16883	15.151	10.0314	9.8026	4.43254	15.7082	122.29	0.190034
ENSMUSG00000008976	Gabpa	16	+	84834925	84863779	GA repeat binding protein, alpha [Source:MGI Symbol;Acc:MGI:95610]	protein_coding	2.3243	1.63887	5.605	1.30111	1.92197	0.382058	0.151887	0.543216	1.08425	72.4808	4.84329	4.59302	7.54626	6.37937	15.8186	3.59057	1.00877	-0.0556705
ENSMUSG00000008999	Bmp7	2	-	172868012	172940321	bone morphogenetic protein 7 [Source:MGI Symbol;Acc:MGI:103302]	protein_coding	0.494635	-0.0176163	1.27202	0.313462	1.05784	0.647479	0.0288188	0.0599433	0.595196	2.10569	0.961825	2.87836	1.91159	0.157369	1.21325	0.870439	0.53558	0.0597393
ENSMUSG00000009013	Dynll1	5	-	115297110	115300999	dynein light chain LC8-type 1 [Source:MGI Symbol;Acc:MGI:1861457]	protein_coding	8.92683	6.71512	7.79141	53.3664	23.2476	92.0322	32.7505	5.21412	4.87463	3.80152	12.2514	16.6034	163.304	115.304	187.619	15.0139	9.11558	16.4471
ENSMUSG00000009030	Pdcl	2	-	37350074	37359332	phosducin-like [Source:MGI Symbol;Acc:MGI:1914716]	protein_coding	1.33465	8.54393	2.03217	3.56074	3.67723	1.07264	-0.201358	1.26543	1.18831	5.71399	3.69411	2.37632	43.727	16.4563	7.28312	4.66274	1.68929	6.24835
ENSMUSG00000009035	Tmem184b	15	-	79360684	79403569	transmembrane protein 184b [Source:MGI Symbol;Acc:MGI:2445179]	protein_coding	7.28706	0.338733	3.34134	2.17061	4.89491	2.13698	0.270219	1.28412	0.789636	8.89087	7.88514	6.47032	9.59376	5.63696	11.0671	-0.34691	1.20858	0.338318
ENSMUSG00000009047	Gm5965	16	+	88777896	88778728	predicted gene 5965 [Source:MGI Symbol;Acc:MGI:3645197]	protein_coding	0.101573	0.4281	0.000596639	0.445201	0.676168	0.0979803	0.268361	-0.36559	0.242759	1.14036	3.10087	4.53135	0.00737253	-0.00406376	-0.0032681	1.15166	0.232846	1.04687
ENSMUSG00000009070	Rsph14	10	-	74957477	75032586	radial spoke head homolog 14 (Chlamydomonas) [Source:MGI Symbol;Acc:MGI:1918486]	protein_coding	0.634313	-0.0116361	1.36269	0.58936	0.10168	1.09348	0.11851	-0.208354	0.667703	4.57429	4.19124	3.78637	0.0398768	-0.031327	-0.0072476	-0.337558	0.499607	0.0397208
ENSMUSG00000009073	Nf2	11	-	4765845	4849536	neurofibromin 2 [Source:MGI Symbol;Acc:MGI:97307]	protein_coding	11.7367	4.23326	5.67343	16.9755	3.12582	2.63327	-0.108466	1.77143	0.447293	3.88112	8.24128	7.00541	3.27931	2.20543	2.68348	0.110946	0.392107	5.37011
ENSMUSG00000009075	Cabp7	11	-	4736892	4746778	calcium binding protein 7 [Source:MGI Symbol;Acc:MGI:2183437]	protein_coding	-0.00784813	-0.139406	0.171179	5.61772	0.18507	0.595279	0.451801	0.716677	0.559601	2.59306	2.4938	1.65916	-0.00118819	0.0039922	-0.00279146	0.842695	0.503759	0.614417
ENSMUSG00000009076	Zmat5	11	+	4704678	4737669	zinc finger, matrin type 5 [Source:MGI Symbol;Acc:MGI:1914428]	protein_coding	3.55992	36.4223	2.95299	0.254579	6.63249	6.10124	-0.685513	7.46435	1.69817	2.97367	3.18954	17.6959	19.5851	34.9191	-0.0131113	9.30588	1.51753	50.8855
ENSMUSG00000009079	Ewsr1	11	-	5069689	5099266	Ewing sarcoma breakpoint region 1 [Source:MGI Symbol;Acc:MGI:99960]	protein_coding	42.604	57.9182	35.8673	162.266	81.8062	46.3209	74.7602	153.614	410.757	41.3929	26.158	154.961	50.7649	46.8014	57.0929	26.5997	6.12024	52.3925
ENSMUSG00000009090	Ap1b1	11	+	4986824	5042791	adaptor protein complex AP-1, beta 1 subunit [Source:MGI Symbol;Acc:MGI:1096368]	protein_coding	1.91	0.0900389	3.50389	1.78765	7.34126	3.38561	0.0080451	0.678475	3.68931	4.47884	4.31445	5.00306	12.3193	6.88162	8.00613	0.134439	1.77234	-0.0951928
ENSMUSG00000009092	Derl3	10	+	75893413	75895941	Der1-like domain family, member 3 [Source:MGI Symbol;Acc:MGI:1917627]	protein_coding	9.95523	4.49155	3.96633	0.990465	9.34525	1.79795	0.178778	4.94522	0.822927	7.96257	3.74305	3.2382	0.169339	2.74494	-0.00648497	-0.446656	1.10379	0.259308
ENSMUSG00000009093	Gstt4	10	-	75814943	75822543	glutathione S-transferase, theta 4 [Source:MGI Symbol;Acc:MGI:1923136]	protein_coding	0.130877	-0.139154	0.0272101	0.364712	0.211324	0.728538	0.639903	-0.490998	0.361152	3.17445	3.54718	4.59207	0.00928441	-0.00456387	-0.00465638	1.7001	0.354513	0.613605
ENSMUSG00000009097	Tbx1	16	-	18580979	18590671	T-box 1 [Source:MGI Symbol;Acc:MGI:98493]	protein_coding	0.227496	0.449036	0.933934	1.01552	0.757493	0.76726	0.409862	-0.0168496	0.717387	3.28156	4.05855	5.50952	0.0549467	-0.0100693	-0.00566892	1.21537	0.587152	0.605268
ENSMUSG00000009108	Gnat2	3	+	108092789	108101432	guanine nucleotide binding protein, alpha transducing 2 [Source:MGI Symbol;Acc:MGI:95779]	protein_coding	1.45866	5.6375	1.28889	0.948822	0.642654	1.72783	0.238485	0.794505	0.88141	3.34805	5.28551	3.00655	0.0143781	-0.00987091	-0.00434633	-0.420244	0.402717	0.523885
ENSMUSG00000009112	Bcl2l13	6	+	120836212	120892842	BCL2-like 13 (apoptosis facilitator) [Source:MGI Symbol;Acc:MGI:2136959]	protein_coding	0.303517	9.12349	1.41645	0.790936	2.52623	0.552605	0.616022	1.01103	1.07466	5.15252	3.48448	4.71088	1.8809	3.3752	5.17258	2.01225	3.77886	0.955941
ENSMUSG00000009114	2610028H24Rik	10	+	76449081	76461110	RIKEN cDNA 2610028H24 gene [Source:MGI Symbol;Acc:MGI:1924214]	protein_coding	0.033691	-0.0749275	0.0457635	0.452047	0.0990146	0.527005	0.211604	0.479605	0.27626	1.28585	2.7763	3.29118	0.00235236	-0.000365381	-0.00198218	-0.318864	0.814027	0.344795
ENSMUSG00000009115	Spatc1l	10	+	76562272	76570201	spermatogenesis and centriole associated 1 like [Source:MGI Symbol;Acc:MGI:1923823]	protein_coding	0.155981	-0.0795533	-0.0601672	0.502564	0.126521	0.493593	0.221426	0.386818	0.281975	1.78813	1.14807	4.50463	0.0113048	-0.00752754	-0.0036786	-0.386507	0.250608	0.303375
ENSMUSG00000009145	Dqx1	6	+	83057844	83067318	DEAQ RNA-dependent ATPase [Source:MGI Symbol;Acc:MGI:2136388]	protein_coding	0.136056	1.04544	1.46196	26.8919	7.18804	15.9942	0.181798	1.20565	0.360484	1.79089	2.60239	2.72866	0.00995574	-0.00671076	9.37092	0.839078	0.716187	2.27823
ENSMUSG00000009185	Ccl8	11	+	82115185	82116799	chemokine (C-C motif) ligand 8 [Source:MGI Symbol;Acc:MGI:101878]	protein_coding	11.6706	0.825843	23.4471	0.817444	160.019	0.731099	-0.743355	1.19069	5.239	2.59136	15.3241	3.09212	0.227044	0.859072	-0.0244624	1.54076	1.66457	1.94855
ENSMUSG00000009207	Lnpk	2	-	74520291	74579435	lunapark, ER junction formation factor [Source:MGI Symbol;Acc:MGI:1918115]	protein_coding	10.8456	11.6371	3.67973	11.8066	3.18689	2.72731	-0.211031	2.44047	0.611658	3.40169	5.99963	11.3749	11.2499	10.6044	13.3659	1.26309	1.7359	30.3077
ENSMUSG00000009210	Prr29	11	+	106365472	106377558	proline rich 29 [Source:MGI Symbol;Acc:MGI:1922823]	protein_coding	0.620478	3.1813	1.53467	0.181823	-0.00966751	0.520644	-0.196333	-0.157288	0.820859	25.7195	3.39067	4.84436	0.0395306	-0.0328517	-0.00535148	0.0206059	0.264726	0.0351622
ENSMUSG00000009214	Mymk	2	-	27061636	27072179	myomaker, myoblast fusion factor [Source:MGI Symbol;Acc:MGI:1913389]	protein_coding	0.127296	-0.0812614	-0.0344604	0.800234	0.124097	0.782327	0.228271	0.191587	0.25264	2.06791	2.64891	2.09925	0.00927475	-0.00585393	-0.00335523	-0.380516	0.231297	0.311014
ENSMUSG00000009216	Fam163b	2	-	27110380	27142491	family with sequence similarity 163, member B [Source:MGI Symbol;Acc:MGI:1926106]	protein_coding	4.47518	-0.0626844	2.42549	0.308396	0.0921373	0.897567	0.170374	1.05801	0.321585	2.21452	2.41029	2.27248	0.00650362	-0.00400986	1.11226	-0.302717	0.486704	0.229756
ENSMUSG00000009246	Trpm5	7	-	143069153	143094642	transient receptor potential cation channel, subfamily M, member 5 [Source:MGI Symbol;Acc:MGI:1861718]	protein_coding	2.71311	3.92558	2.53776	0.727464	0.585954	0.958131	0.435653	0.18174	0.614169	3.2582	4.17244	3.90839	0.663781	0.00248211	0.103547	-0.0101579	0.314281	0.660948
ENSMUSG00000009248	Ascl2	7	-	142966829	142969264	achaete-scute family bHLH transcription factor 2 [Source:MGI Symbol;Acc:MGI:96920]	protein_coding	0.500586	-0.0742421	2.36867	0.991914	1.16312	0.545651	0.692596	0.0495297	0.949032	2.05529	1.92781	2.89181	0.0863247	-0.0244343	-0.00729027	2.27906	0.498638	0.280761
ENSMUSG00000009281	Rarres2	6	-	48569696	48572789	retinoic acid receptor responder (tazarotene induced) 2 [Source:MGI Symbol;Acc:MGI:1918910]	protein_coding	1.93068	3.11184	-0.332437	0.51474	0.897258	1.83644	-0.164974	1.94553	0.424238	30.3212	2.13212	5.48229	0.0274582	-0.0232864	-0.00351992	0.0682556	0.15929	10.3941
ENSMUSG00000009291	Pttg1ip	10	+	77581720	77598732	pituitary tumor-transforming 1 interacting protein [Source:MGI Symbol;Acc:MGI:2652132]	protein_coding	1.26161	0.290717	12.5721	151.604	81.7943	16.6873	27.6114	11.1513	119.363	109.546	12.0641	28.4694	10.2207	27.6659	17.2968	5.11177	5.00639	-0.492534
ENSMUSG00000009292	Trpm2	10	-	77907722	77970563	transient receptor potential cation channel, subfamily M, member 2 [Source:MGI Symbol;Acc:MGI:1351901]	protein_coding	2.65978	6.80623	5.9266	1.94495	1.93412	3.09773	0.78481	3.0147	13.7493	7.93128	8.09281	9.9359	10.3076	1.58358	2.71957	0.733308	0.467432	1.9309
ENSMUSG00000009293	Ube2g2	10	+	77622275	77645993	ubiquitin-conjugating enzyme E2G 2 [Source:MGI Symbol;Acc:MGI:1343188]	protein_coding	11.2259	2.95185	3.5216	1.59556	7.75313	3.23683	0.575928	8.03546	2.70117	5.21327	25.2416	11.7582	11.0681	9.14963	12.5253	0.784359	1.75365	19.626
ENSMUSG00000009350	Mpo	11	+	87793581	87804413	myeloperoxidase [Source:MGI Symbol;Acc:MGI:97137]	protein_coding	-0.396095	3.13649	5.10439	108.224	27.2637	93.6802	436.228	3553.02	492.723	47.3771	7.00034	14.5912	2272.4	1279.9	1112.86	13.2838	732.353	16.4044
ENSMUSG00000009356	Lpo	11	-	87806428	87828289	lactoperoxidase [Source:MGI Symbol;Acc:MGI:1923363]	protein_coding	0.378519	-0.0296699	0.751822	0.60235	0.0929675	0.924851	0.0641743	0.688245	0.651806	2.70006	4.66514	2.98027	0.0257961	-0.020076	-0.00517536	-0.311298	0.907218	0.388767
ENSMUSG00000009376	Met	6	+	17463800	17573980	met proto-oncogene [Source:MGI Symbol;Acc:MGI:96969]	protein_coding	0.293589	5.46159	1.55026	0.796447	0.623707	0.412494	0.210407	0.0556147	0.569592	2.0609	2.98928	1.97897	14.9695	10.1857	12.4128	0.384582	0.598586	0.415291
ENSMUSG00000009378	Slc16a12	19	-	34668403	34747289	solute carrier family 16 (monocarboxylic acid transporters), member 12 [Source:MGI Symbol;Acc:MGI:2147716]	protein_coding	0.544977	2.86349	1.93477	2.68269	0.122897	0.677188	0.171414	1.02334	0.405989	2.65533	3.94921	1.63287	0.0182433	-0.0133831	-0.00459479	0.884379	0.451323	0.486881
ENSMUSG00000009394	Syn2	6	+	115134902	115282006	synapsin II [Source:MGI Symbol;Acc:MGI:103020]	protein_coding	4.72826	3.2736	2.06996	1.23495	0.20429	2.20705	0.188816	1.39245	0.681223	4.16882	5.82526	7.81993	0.0893917	-0.011081	-0.00421708	-0.380782	0.55753	3.56256
ENSMUSG00000009406	Elk1	X	-	20933395	20950608	ELK1, member of ETS oncogene family [Source:MGI Symbol;Acc:MGI:101833]	protein_coding	10.0603	3.72271	2.3747	0.388154	0.479309	0.894413	0.15662	0.203951	0.298911	3.06988	2.08986	3.32733	0.266072	-0.00844845	2.79099	5.13951	0.429301	10.6541
ENSMUSG00000009418	Nav1	1	-	135434580	135688105	neuron navigator 1 [Source:MGI Symbol;Acc:MGI:2183683]	protein_coding	3.80869	6.89924	4.30635	1.80152	1.23945	2.822	0.412986	2.43905	1.11435	7.29154	5.81801	4.15814	2.04126	1.75795	3.61604	0.173812	1.05961	0.750461
ENSMUSG00000009470	Tnpo1	13	-	98839019	98926384	transportin 1 [Source:MGI Symbol;Acc:MGI:2681523]	protein_coding	9.25764	7.7659	3.18134	37.2097	2.53227	4.28031	23.9791	1.55976	0.267143	3.24576	3.97775	5.41072	9.40852	19.1806	14.8761	1.79887	0.655049	0.342004
ENSMUSG00000009471	Myod1	7	+	46376474	46379099	myogenic differentiation 1 [Source:MGI Symbol;Acc:MGI:97275]	protein_coding	0.169183	-0.0141819	0.348456	0.124863	0.043781	0.329922	0.0297726	-0.185381	0.192077	1.39741	2.39211	3.28525	9.14036	-0.00983491	-0.00251594	-0.164587	0.143102	0.19085
ENSMUSG00000009487	Otog	7	+	46240987	46311434	otogelin [Source:MGI Symbol;Acc:MGI:1202064]	protein_coding	0.232059	1.01998	0.249092	0.448263	0.289581	0.648122	0.186711	1.0204	0.482346	1.98193	1.83266	1.85839	0.0165053	2.39856	-0.00433139	-0.105266	0.341232	0.703984
ENSMUSG00000009535	Rnmt	18	+	68300355	68324852	RNA (guanine-7-) methyltransferase [Source:MGI Symbol;Acc:MGI:1915147]	protein_coding	3.39619	4.89964	4.86252	31.2541	126.347	5.79648	2.47913	2.93031	0.468895	7.46487	3.12515	10.4047	14.0577	6.8186	24.7819	8.81408	4.40278	1.37998
ENSMUSG00000009545	Kcnq1	7	+	143106362	143427042	potassium voltage-gated channel, subfamily Q, member 1 [Source:MGI Symbol;Acc:MGI:108083]	protein_coding	0.928938	1.79912	2.90072	1.67751	0.153575	2.52924	-0.0545079	0.126154	1.01628	8.69726	6.51063	6.6732	0.0918045	0.154804	0.0307114	-0.326946	0.77239	0.0681452
ENSMUSG00000009549	Srp14	2	-	118475850	118479711	signal recognition particle 14 [Source:MGI Symbol;Acc:MGI:107169]	protein_coding	96.3458	0.510956	23.1633	66.7954	23.9273	25.6579	9.46463	25.0595	1.50094	21.7558	11.3165	36.849	188.767	251.168	149.91	43.0765	3.05679	86.6734
ENSMUSG00000009551	6330409D20Rik	2	-	32732620	32741016	RIKEN cDNA 6330409D20 gene [Source:MGI Symbol;Acc:MGI:1917980]	protein_coding	0.424046	4.95427	-0.0894831	0.617767	0.206789	1.77311	0.373086	2.90197	0.657365	2.20435	2.74944	6.0108	0.0175986	-0.0116045	-0.00575649	-0.537323	0.587729	1.34705
ENSMUSG00000009555	Cdk9	2	-	32705784	32713076	cyclin-dependent kinase 9 (CDC2-related kinase) [Source:MGI Symbol;Acc:MGI:1328368]	protein_coding	1.32283	10.9011	5.40681	104.517	12.0807	6.07836	3.27159	5.91597	2.3107	11.5675	11.0178	12.6426	6.96012	13.233	13.7656	2.58615	3.47533	0.393649
ENSMUSG00000009563	Tor2a	2	+	32757234	32762244	torsin family 2, member A [Source:MGI Symbol;Acc:MGI:1353596]	protein_coding	10.0647	7.7574	5.3187	93.1721	6.33167	3.25748	74.1357	2.92183	0.72751	5.01384	5.07755	5.82749	0.603939	4.5418	8.59665	12.4272	1.89511	0.124813
ENSMUSG00000009566	Fpgs	2	-	32682609	32704145	folylpolyglutamyl synthetase [Source:MGI Symbol;Acc:MGI:95576]	protein_coding	0.509312	1.38665	1.23417	0.853416	4.13985	1.16798	0.353429	1.03261	0.775696	8.07484	10.1085	5.73405	15.1146	2.72756	0.847516	1.6465	0.973971	0.576664
ENSMUSG00000009569	Mrtfb	16	+	13256481	13417529	myocardin related transcription factor B [Source:MGI Symbol;Acc:MGI:3050795]	protein_coding	22.5262	1.20594	4.98831	11.7583	7.13203	3.73697	3.22336	2.30453	2.01629	3.05852	3.77974	5.6721	3.38888	0.595426	0.615399	2.41495	-0.116287	4.39392
ENSMUSG00000009575	Cbx5	15	-	103191544	103239816	chromobox 5 [Source:MGI Symbol;Acc:MGI:109372]	protein_coding	6.96319	4.45654	6.74968	19.0861	1.95409	3.03186	29.2146	2.37499	0.129116	3.51475	5.53263	8.92632	14.216	19.2065	13.5304	6.63034	0.302518	0.797328
ENSMUSG00000009580	Odam	5	+	87885029	87894174	odontogenic, ameloblast asssociated [Source:MGI Symbol;Acc:MGI:1916842]	protein_coding	0.20906	-0.0216088	-0.154644	0.859621	0.0588367	0.832376	0.101182	-0.233337	0.346835	2.64328	0.878626	2.33581	0.0151609	-0.0118299	-0.00314181	-0.212739	0.183972	0.0728528
ENSMUSG00000009585	Apobec3	15	+	79891659	79915906	apolipoprotein B mRNA editing enzyme, catalytic polypeptide 3 [Source:MGI Symbol;Acc:MGI:1933111]	protein_coding	3.86946	9.00741	22.1342	25.1026	18.1575	6.71743	0.253419	5.40315	2.8783	7.83516	10.0968	14.255	12.5417	7.18699	2.96999	0.948171	94.4128	0.583016
ENSMUSG00000009588	St6galnac1	11	-	116765025	116775507	ST6 (alpha-N-acetyl-neuraminyl-2,3-beta-galactosyl-1,3)-N-acetylgalactosaminide alpha-2,6-sialyltransferase 1 [Source:MGI Symbol;Acc:MGI:1341826]	protein_coding	0.0763846	-0.0491772	-0.0229137	0.252789	0.233956	0.404969	0.13003	0.648059	0.146102	1.30777	0.669234	0.929619	0.00569359	-0.00363791	-0.00203084	-0.249194	0.133689	0.174839
ENSMUSG00000009596	Taf7l	X	-	134460118	134476490	TATA-box binding protein associated factor 7 like [Source:MGI Symbol;Acc:MGI:1921719]	protein_coding	7.08398	-0.160887	3.30112	0.321642	0.181913	-0.0820188	0.556989	-0.0139996	0.0200353	1.39619	1.38305	1.96593	0.195474	0.0168117	-0.000627537	-0.488217	0.230867	0.748954
ENSMUSG00000009614	Sardh	2	-	27188393	27248337	sarcosine dehydrogenase [Source:MGI Symbol;Acc:MGI:2183102]	protein_coding	1.87017	-0.105446	1.77268	0.909669	0.874668	1.09783	0.299973	0.369434	0.734558	4.35316	3.3417	3.01542	0.0805449	1.33119	-0.00732487	0.623136	0.996154	0.652343
ENSMUSG00000009621	Vav2	2	-	27262104	27427033	vav 2 oncogene [Source:MGI Symbol;Acc:MGI:102718]	protein_coding	0.540726	2.9817	1.10682	7.67114	0.759407	0.910071	-0.0404819	1.76681	0.726708	3.58754	2.80987	3.96348	7.10374	1.88228	1.0962	-0.236056	0.521554	1.85085
ENSMUSG00000009628	Tex15	8	+	33516738	33585582	testis expressed gene 15 [Source:MGI Symbol;Acc:MGI:1934816]	protein_coding	3.10919	3.49346	1.97448	0.690163	1.44407	0.928842	0.500817	0.253581	0.376043	3.39101	2.62006	3.52682	0.995813	0.948641	0.266416	0.284766	0.228253	0.665008
ENSMUSG00000009630	Ppp2cb	8	+	33599625	33619441	protein phosphatase 2 (formerly 2A), catalytic subunit, beta isoform [Source:MGI Symbol;Acc:MGI:1321161]	protein_coding	1.32606	3.87877	2.66111	0.902189	6.39121	1.5094	10.2875	3.72853	0.836742	4.79829	5.84417	7.27888	18.1115	10.1708	9.3689	10.4955	2.52846	-0.345591
ENSMUSG00000009633	G0s2	1	-	193272161	193273217	G0/G1 switch gene 2 [Source:MGI Symbol;Acc:MGI:1316737]	protein_coding	2.99199	0.109764	1.89621	1.19074	1.10077	1.05143	48.9401	0.740197	0.911585	58.2004	8.21902	7.02344	1.54675	2.60925	0.765831	17.9926	6.5623	-0.28131
ENSMUSG00000009640	Dmap1	4	-	117674681	117682273	DNA methyltransferase 1-associated protein 1 [Source:MGI Symbol;Acc:MGI:1913483]	protein_coding	1.88527	-0.00772784	2.26584	1.38726	6.60756	3.8498	0.112033	-0.087164	0.771775	4.41731	2.228	1.84299	0.0340111	-0.0269005	9.2345	1.4241	1.13533	0.0264721
ENSMUSG00000009646	Pla2g12b	10	+	59403660	59421976	phospholipase A2, group XIIB [Source:MGI Symbol;Acc:MGI:1917086]	protein_coding	0.412984	-0.0120051	0.350186	0.622221	0.384399	0.233495	0.016609	-0.316906	0.44001	4.02622	4.41754	5.12596	0.0278861	-0.0220637	-0.00518011	-0.26477	0.307222	0.0404641
ENSMUSG00000009647	Mcu	10	-	59446984	59616692	mitochondrial calcium uniporter [Source:MGI Symbol;Acc:MGI:3026965]	protein_coding	18.0593	6.13879	10.1198	4.27157	5.12248	1.06895	1.15958	0.751045	0.343644	5.99284	83.3422	8.71533	8.69245	1.11271	0.966973	2.09407	0.791362	1.67979
ENSMUSG00000009654	Oit3	10	-	59422958	59441778	oncoprotein induced transcript 3 [Source:MGI Symbol;Acc:MGI:1201782]	protein_coding	5.91183	-0.0714693	2.33469	0.539243	0.261958	0.0934251	0.19814	0.598842	0.190298	0.841194	3.00877	2.7136	0.0721819	-0.00365307	-0.00261278	-0.331358	0.180165	0.267254
ENSMUSG00000009670	Tex11	X	-	100838648	101059667	testis expressed gene 11 [Source:MGI Symbol;Acc:MGI:1933237]	protein_coding	5.86577	1.06134	0.7266	0.19574	0.395461	0.319965	0.568528	-0.252207	-0.128575	1.81421	1.61065	2.27919	-0.0297353	0.0286753	0.37394	0.422338	-0.0173985	1.83641
ENSMUSG00000009681	Bcr	10	+	75060592	75184921	BCR activator of RhoGEF and GTPase [Source:MGI Symbol;Acc:MGI:88141]	protein_coding	0.800836	0.681808	1.4033	1.2487	0.738614	1.10625	0.0862793	0.279113	1.0095	6.66652	5.35574	5.3133	0.485726	0.908977	0.887	1.08843	1.06085	1.01071
ENSMUSG00000009687	Fxyd5	7	-	31032722	31042481	FXYD domain-containing ion transport regulator 5 [Source:MGI Symbol;Acc:MGI:1201785]	protein_coding	54.6485	18.9222	188.512	67.01	46.3741	175.777	220.266	67.0267	769.152	48.8941	36.6506	95.7846	314.369	333.003	236.529	154.553	308.689	109.688
ENSMUSG00000009731	Kcnd1	X	+	7822289	7838280	potassium voltage-gated channel, Shal-related family, member 1 [Source:MGI Symbol;Acc:MGI:96671]	protein_coding	0.0704138	-0.0605378	-0.00558198	0.223682	1.05448	0.145908	0.164492	0.838186	0.156603	0.742779	2.36924	1.3444	0.0387041	-0.00299878	2.01273	-0.286874	0.344069	0.220748
ENSMUSG00000009733	Tfcp2	15	-	100498012	100552008	transcription factor CP2 [Source:MGI Symbol;Acc:MGI:98509]	protein_coding	18.5628	9.78691	10.5444	1.82143	1.64212	1.21437	1.12772	1.42976	0.540289	6.7158	7.38063	8.92885	0.792469	1.46976	2.35086	1.00809	0.45762	1.30251
ENSMUSG00000009734	Pou6f2	13	-	18121098	18397686	POU domain, class 6, transcription factor 2 [Source:MGI Symbol;Acc:MGI:2443631]	protein_coding	1.89436	3.88763	2.67375	0.769856	0.563482	0.325759	0.501858	0.632646	0.621354	3.66124	3.82253	5.04666	0.00640001	0.104193	-0.00445198	1.40037	0.54038	1.03617
ENSMUSG00000009739	Pou6f1	15	-	100575318	100599984	POU domain, class 6, transcription factor 1 [Source:MGI Symbol;Acc:MGI:102935]	protein_coding	1.54937	4.24826	0.430218	1.17437	0.657775	2.33975	-0.16019	3.18164	1.47414	2.12088	5.77551	4.75397	0.362481	0.628374	-0.0114911	0.547908	0.964729	21.1371
ENSMUSG00000009741	Ubp1	9	+	113930934	113977202	upstream binding protein 1 [Source:MGI Symbol;Acc:MGI:104889]	protein_coding	12.9298	2.42131	4.60805	3.04322	8.67964	50.7884	37.2092	0.931188	15.6264	2.56029	4.54784	2.2104	13.9377	10.118	17.3912	2.72843	0.87694	1.04541
ENSMUSG00000009772	Nuak2	1	+	132316126	132333488	NUAK family, SNF1-like kinase, 2 [Source:MGI Symbol;Acc:MGI:1921387]	protein_coding	10.8331	-0.104997	5.01719	2.01842	2.4969	2.88243	0.311864	1.29054	0.449513	3.74032	5.60789	6.81714	2.57764	4.38162	8.19579	0.116821	1.06469	0.466145
ENSMUSG00000009828	Cilk1	9	+	78109192	78172107	ciliogenesis associated kinase 1 [Source:MGI Symbol;Acc:MGI:1934157]	protein_coding	11.0311	9.98359	8.31511	1.13035	3.10673	2.0302	0.53388	0.911657	0.813264	8.43006	5.7765	5.64334	0.684362	0.544638	0.141749	0.331302	0.587168	1.03601
ENSMUSG00000009863	Sdhb	4	+	140961203	140979193	succinate dehydrogenase complex, subunit B, iron sulfur (Ip) [Source:MGI Symbol;Acc:MGI:1914930]	protein_coding	94.5402	26.1495	12.8396	219.125	361.63	38.1583	50.5301	39.8095	3.63033	10.6364	954.729	31.3673	133.955	262.235	212.298	150.22	10.0925	75.4565
ENSMUSG00000009876	Cox4i2	2	+	152754173	152765037	cytochrome c oxidase subunit 4I2 [Source:MGI Symbol;Acc:MGI:2135755]	protein_coding	0.392712	-0.0365801	1.19671	0.297419	0.103828	0.390083	0.08278	0.650491	1.16565	3.15658	1.519	3.80881	0.0266064	-0.0205699	-0.00545924	-0.338622	0.341041	0.127477
ENSMUSG00000009894	Snap47	11	-	59407134	59451186	synaptosomal-associated protein, 47 [Source:MGI Symbol;Acc:MGI:1915076]	protein_coding	0.82922	2.33261	4.04193	0.303373	2.04649	2.62812	-0.351105	3.52891	0.505099	3.15889	4.38192	7.60359	1.06822	0.807124	1.10698	0.379482	0.637213	-0.321254
ENSMUSG00000009900	Wnt3a	11	-	59248033	59290752	wingless-type MMTV integration site family, member 3A [Source:MGI Symbol;Acc:MGI:98956]	protein_coding	3.70374	-0.0845046	1.15174	0.481073	0.100534	0.680076	0.296276	0.905712	0.345067	2.22913	1.82571	2.45249	0.0452161	0.00391231	-0.0013002	-0.321022	0.111344	0.369724
ENSMUSG00000009905	Kdsr	1	-	106720459	106759727	3-ketodihydrosphingosine reductase [Source:MGI Symbol;Acc:MGI:1918000]	protein_coding	7.48844	1.07646	2.90382	0.86097	1.26938	10.275	8.64724	1.61021	1.5321	5.06851	5.39073	4.34719	8.8284	9.74518	14.3703	0.96016	1.29622	0.410119
ENSMUSG00000009907	Vps4b	1	-	106764071	106796728	vacuolar protein sorting 4B [Source:MGI Symbol;Acc:MGI:1100499]	protein_coding	10.7308	19.349	10.6477	41.5558	44.5151	5.72638	8.19055	2.54492	3.32419	10.4195	5.23982	11.8158	32.34	21.5453	56.3769	7.39656	1.50759	2.23509
ENSMUSG00000009927	Rps25	9	+	44407139	44410427	ribosomal protein S25 [Source:MGI Symbol;Acc:MGI:1922867]	protein_coding	61.0608	82.4093	193.919	129.341	75.5416	101.492	145.206	112.829	591.437	120.145	143.884	90.8954	600.181	701.039	740.169	250.048	280.955	119.179
ENSMUSG00000009941	Nxf2	X	-	134944526	134964754	nuclear RNA export factor 2 [Source:MGI Symbol;Acc:MGI:1933192]	protein_coding	0.309881	1.98093	0.676239	0.336997	0.0884856	0.161438	0.0769617	0.151112	0.370312	0.723996	1.39244	2.36445	0.0216142	0.074391	-0.00452351	-0.298324	0.276992	0.116028
ENSMUSG00000009995	Taz	X	+	74281912	74290151	tafazzin [Source:MGI Symbol;Acc:MGI:109626]	protein_coding	14.3863	2.36457	6.89519	1.79528	16.1767	1.30628	1.85252	68.3417	2.19036	6.65161	5.86775	3.6501	0.052947	19.4804	22.8306	1.32386	2.53839	1.59583
ENSMUSG00000010021	Kif19a	11	+	114765388	114790739	kinesin family member 19A [Source:MGI Symbol;Acc:MGI:2447024]	protein_coding	0.376292	-0.0229776	0.110705	0.43078	0.293695	0.36563	0.0462462	0.646251	0.421524	2.17687	1.96266	3.28257	0.0256903	4.63578	-0.00501981	-0.288238	0.448706	0.305865
ENSMUSG00000010025	Aldh3a2	11	-	61223417	61267464	aldehyde dehydrogenase family 3, subfamily A2 [Source:MGI Symbol;Acc:MGI:1353452]	protein_coding	16.5306	2.29029	0.551517	1.83523	1.35473	12.1135	9.11747	0.747217	2.11832	58.1713	7.43507	9.87225	0.11997	3.91215	1.20603	8.85588	1.17406	23.8396
ENSMUSG00000010044	Zmynd10	9	+	107547298	107551319	zinc finger, MYND domain containing 10 [Source:MGI Symbol;Acc:MGI:2387863]	protein_coding	0.221745	-0.0656382	-0.124	0.257204	1.17457	1.56374	0.174251	2.26623	0.448251	2.33974	3.28682	2.12648	0.0158308	-0.0114522	-0.00417975	-0.368434	0.27416	0.365782
ENSMUSG00000010045	Tmem115	9	+	107533945	107538673	transmembrane protein 115 [Source:MGI Symbol;Acc:MGI:1930765]	protein_coding	0.392717	0.0682407	3.67845	0.437529	0.927666	2.06638	-0.0736418	1.46948	20.2797	2.85242	2.53476	6.33268	0.0270029	4.32792	-0.00346748	0.065848	0.668129	-0.0601996
ENSMUSG00000010047	Hyal2	9	+	107567945	107572779	hyaluronoglucosaminidase 2 [Source:MGI Symbol;Acc:MGI:1196334]	protein_coding	8.41923	-0.0485591	2.14414	0.539842	1.32064	0.772982	0.129269	0.680789	0.283146	1.86987	2.01949	2.08994	1.01571	5.62967	0.450652	-0.233634	0.395213	0.387557
ENSMUSG00000010048	Ifrd2	9	+	107587642	107593385	interferon-related developmental regulator 2 [Source:MGI Symbol;Acc:MGI:1316708]	protein_coding	0.144247	-0.0379266	-0.0916108	0.469334	4.13589	2.10467	0.0949101	1.51844	0.633578	2.29412	1.71104	3.46855	0.0106499	3.07094	-0.00267855	-0.241781	0.165303	0.230336
ENSMUSG00000010051	Hyal1	9	+	107576927	107581710	hyaluronoglucosaminidase 1 [Source:MGI Symbol;Acc:MGI:96298]	protein_coding	0.540413	1.96976	2.48298	0.560052	0.277913	0.859913	0.0982591	0.976224	0.721757	2.27057	2.32056	2.93798	0.0349333	-0.0272752	0.0996475	0.318166	4.9301	0.199436
ENSMUSG00000010054	Tusc2	9	+	107563255	107566112	tumor suppressor 2, mitochondrial calcium regulator [Source:MGI Symbol;Acc:MGI:1931086]	protein_coding	2.48907	12.1297	0.419504	0.414584	45.7314	2.5526	20.7704	3.40227	2.18373	2.35945	3.43521	4.02459	14.8647	8.25646	15.113	0.771903	1.12755	0.220055
ENSMUSG00000010057	Nprl2	9	+	107542226	107545706	NPR2 like, GATOR1 complex subunit [Source:MGI Symbol;Acc:MGI:1914482]	protein_coding	0.517674	0.194907	1.90813	0.15306	2.97314	4.01932	56.4398	0.797418	88.4709	1.85076	1.95826	6.19218	0.0344923	-0.0308882	13.4294	0.680261	0.459163	-0.432641
ENSMUSG00000010064	Slc38a3	9	-	107650634	107669530	solute carrier family 38, member 3 [Source:MGI Symbol;Acc:MGI:1923507]	protein_coding	6.12992	-0.175962	0.541065	0.729518	0.924895	4.49204	0.631536	2.91088	-0.0042842	6.57205	2.69348	5.36872	-0.0195701	0.0202886	-0.000321389	-0.513366	0.394108	0.989821
ENSMUSG00000010066	Cacna2d2	9	+	107399612	107529343	calcium channel, voltage-dependent, alpha 2/delta subunit 2 [Source:MGI Symbol;Acc:MGI:1929813]	protein_coding	0.600188	0.755899	0.654948	1.23257	0.900751	1.28988	0.416301	0.381935	0.513609	4.15905	4.82168	3.79318	0.0471576	0.770267	0.231441	0.983495	0.747745	0.921032
ENSMUSG00000010067	Rassf1	9	+	107551555	107562267	Ras association (RalGDS/AF-6) domain family member 1 [Source:MGI Symbol;Acc:MGI:1928386]	protein_coding	0.889345	2.07436	5.00861	0.0261188	22.3171	12.7245	-0.448015	11.1066	369.162	190.506	6.96842	11.7918	0.843063	12.8177	5.03353	0.816713	3.94944	11.2301
ENSMUSG00000010080	Epn3	11	-	94489599	94499974	epsin 3 [Source:MGI Symbol;Acc:MGI:1919139]	protein_coding	0.00451631	1.5772	0.0876325	0.471933	0.550188	0.775931	0.245364	0.633043	0.203321	2.8971	3.9104	4.09541	0.220794	0.00175244	-0.00177769	-0.337836	0.243497	0.470513
ENSMUSG00000010086	Rnf112	11	-	61448442	61454131	ring finger protein 112 [Source:MGI Symbol;Acc:MGI:106611]	protein_coding	0.516916	4.94822	2.70041	1.91649	0.232228	0.569062	0.0684596	0.919367	0.842735	2.19876	3.36607	2.68157	0.0336346	-0.0261125	-0.00659997	0.215193	0.418541	0.320318
ENSMUSG00000010095	Slc3a2	19	-	8706882	8723369	solute carrier family 3 (activators of dibasic and neutral amino acid transport), member 2 [Source:MGI Symbol;Acc:MGI:96955]	protein_coding	18.2986	5.90513	31.5194	286.524	316.224	19.7501	-0.221312	18.3263	1.87028	190.779	13.5657	27.7121	1.4487	14.017	4.77506	17.3864	212.171	11.3911
ENSMUSG00000010097	Nxf1	19	+	8757073	8770922	nuclear RNA export factor 1 [Source:MGI Symbol;Acc:MGI:1858330]	protein_coding	3.73055	4.82754	0.777226	13.0133	45.6394	5.67023	39.1071	2.28593	2.09323	16.6863	6.27743	5.76537	24.2637	92.6296	40.4616	30.9831	4.88692	6.18982
ENSMUSG00000010110	Stx5a	19	+	8741413	8756069	syntaxin 5A [Source:MGI Symbol;Acc:MGI:1928483]	protein_coding	11.7423	4.98685	17.7813	75.7485	13.0553	5.95841	27.7727	4.51575	2.87489	8.72329	12.0944	13.7699	60.5151	23.273	20.9474	12.5458	5.2568	0.24994
ENSMUSG00000010122	Slc47a1	11	-	61343401	61378345	solute carrier family 47, member 1 [Source:MGI Symbol;Acc:MGI:1914723]	protein_coding	0.350253	0.677311	0.0978556	0.591652	0.498295	1.28076	0.0526223	0.955242	0.397991	3.94435	2.09598	2.62542	0.024122	0.0163381	-0.00478853	-0.285396	0.517237	1.12497
ENSMUSG00000010136	Pifo	3	-	105996957	106014646	primary cilia formation [Source:MGI Symbol;Acc:MGI:1923670]	protein_coding	0.00940785	-0.172875	0.320072	0.54981	0.243527	0.224279	0.60088	0.643193	0.634057	4.29027	2.53614	2.63222	3.69888e-05	0.00378133	-0.00380394	3.64591	0.320755	0.832335
ENSMUSG00000010142	Tnfrsf13b	11	+	61126755	61149372	tumor necrosis factor receptor superfamily, member 13b [Source:MGI Symbol;Acc:MGI:1889411]	protein_coding	19.3401	0.207776	1.85792	0.557586	5.73303	2.38265	-0.372703	2.6461	2.49172	4.40816	4.76956	5.4185	24.9814	40.766	19.6851	6.99525	0.930457	120.169
ENSMUSG00000010154	Spire2	8	+	123332713	123369515	spire type actin nucleation factor 2 [Source:MGI Symbol;Acc:MGI:2446256]	protein_coding	2.78363	5.96254	2.74851	0.533534	1.5453	0.759543	0.573001	-0.277641	0.329715	2.14007	2.10398	1.98901	0.0423865	0.00305879	0.0626757	1.91605	0.359433	0.803993
ENSMUSG00000010175	Prox1	1	-	190118035	190170714	prospero homeobox 1 [Source:MGI Symbol;Acc:MGI:97772]	protein_coding	0.340466	3.22751	1.31852	0.772224	0.39189	0.15123	0.249509	0.458878	0.592847	2.43837	2.35527	1.72551	0.0232646	-0.0168228	-0.00601408	0.898653	0.700036	0.418319
ENSMUSG00000010205	Raver1	9	-	21074158	21092008	ribonucleoprotein, PTB-binding 1 [Source:MGI Symbol;Acc:MGI:1919016]	protein_coding	-0.199048	3.33826	0.358226	0.0808712	1.42027	1.21643	0.243137	0.0282141	-0.0763324	1.45843	1.32742	2.20514	-0.0178414	0.109347	0.0015538	0.359729	0.101077	0.307341
ENSMUSG00000010277	2610507B11Rik	11	+	78261752	78290623	RIKEN cDNA 2610507B11 gene [Source:MGI Symbol;Acc:MGI:1919753]	protein_coding	9.01498	4.48927	0.487801	7.12325	41.3032	6.96141	12.1087	3.62875	1.85727	3.48657	6.09562	9.70693	11.205	5.58885	4.72843	8.28045	1.83015	14.5729
ENSMUSG00000010290	AI597479	1	+	43098710	43115947	expressed sequence AI597479 [Source:MGI Symbol;Acc:MGI:2138299]	protein_coding	0.765915	3.93275	2.48651	0.940271	1.90148	0.784188	0.122077	0.4652	1.1942	3.11087	2.21232	2.29252	2.34475	1.46854	1.59206	1.08538	0.634701	0.414597
ENSMUSG00000010307	Tmem86a	7	+	47050601	47054777	transmembrane protein 86A [Source:MGI Symbol;Acc:MGI:1915143]	protein_coding	0.857201	2.00597	1.07793	1.10712	4.17875	1.72447	-0.131339	1.26666	1.11678	4.17213	2.38706	5.01299	0.236062	-0.0406883	-0.00793904	-0.208353	0.464623	1.5943
ENSMUSG00000010311	Optc	1	-	133897199	133907999	opticin [Source:MGI Symbol;Acc:MGI:2151113]	protein_coding	5.12965	1.35825	0.68228	0.356596	0.142794	1.77725	0.543378	0.831591	-0.136778	4.36952	3.69571	4.41667	-0.0281805	0.0271979	0.00175214	-0.409763	-0.0119943	0.827447
ENSMUSG00000010342	Tex14	11	+	87405065	87555823	testis expressed gene 14 [Source:MGI Symbol;Acc:MGI:1933227]	protein_coding	1.98609	4.35359	0.894123	0.51345	2.37239	1.04373	0.506378	0.369647	0.20742	3.38013	3.33354	3.01491	0.126447	0.0431552	0.439514	0.191331	0.367487	0.830231
ENSMUSG00000010358	Ifi35	11	+	101448407	101458698	interferon-induced protein 35 [Source:MGI Symbol;Acc:MGI:1917360]	protein_coding	26.2259	16.3016	0.823788	1.6332	6.07727	5.97518	12.9412	3.50311	2.63411	3.59882	10.7242	12.193	0.164846	12.1469	14.3543	1.63607	5.4071	24.491
ENSMUSG00000010362	Rdm1	11	+	101627195	101636100	RAD52 motif 1 [Source:MGI Symbol;Acc:MGI:1913849]	protein_coding	13.1331	4.26296	1.59973	0.71799	5.17974	4.23275	-0.478509	0.0103932	1.43255	3.17189	4.65065	10.456	63.5051	23.4529	25.2179	1.29669	2.25723	76.8461
ENSMUSG00000010376	Nedd8	14	-	55662263	55672124	neural precursor cell expressed, developmentally down-regulated gene 8 [Source:MGI Symbol;Acc:MGI:97301]	protein_coding	37.7512	35.6431	34.5522	529.667	30.7913	311.595	103.991	45.0478	197.641	9.89736	17.8006	31.3187	395.672	284.582	245.737	120.489	5.11364	48.6247
ENSMUSG00000010392	Gosr1	11	-	76726602	76763579	golgi SNAP receptor complex member 1 [Source:MGI Symbol;Acc:MGI:1858260]	protein_coding	6.14169	1.19891	2.59193	2.55413	2.21181	1.27542	0.88432	0.732001	0.894046	2.03374	3.54444	3.6652	2.08879	10.9284	2.6472	-0.147862	0.645353	-0.0847256
ENSMUSG00000010406	Mrpl52	14	+	54426909	54429756	mitochondrial ribosomal protein L52 [Source:MGI Symbol;Acc:MGI:1916086]	protein_coding	95.4541	13.6937	11.5094	2.5871	37.5411	24.135	15.9671	7.21605	2.43107	31.93	40.8108	31.3427	266.519	140.587	216.994	64.784	2.66315	45.1831
ENSMUSG00000010435	Spaca7	8	+	12573029	12600744	sperm acrosome associated 7 [Source:MGI Symbol;Acc:MGI:1925884]	protein_coding	0.0429709	-0.0390876	-0.00219877	0.0924581	0.054011	0.36728	0.102175	-0.172038	0.0958196	0.926458	0.987375	1.30594	0.003209	-0.00182618	-0.00137506	-0.193354	0.0914642	0.135815
ENSMUSG00000010453	Kansl3	1	-	36335730	36369181	KAT8 regulatory NSL complex subunit 3 [Source:MGI Symbol;Acc:MGI:1918055]	protein_coding	6.41504	12.3021	4.4058	1.60494	2.99953	3.21631	1.11666	1.50163	1.08747	8.52367	4.13427	6.90565	11.0041	3.15157	4.93737	1.18015	1.18717	2.05017
ENSMUSG00000010461	Eya4	10	-	23102963	23350786	EYA transcriptional coactivator and phosphatase 4 [Source:MGI Symbol;Acc:MGI:1337104]	protein_coding	9.98648	5.56762	26.8862	1.88171	1.16111	1.56257	0.267222	0.165838	1.16572	8.1752	9.0838	7.71826	0.225368	-0.0271333	0.268175	1.31664	1.34715	0.475517
ENSMUSG00000010476	Ebf3	7	-	137193673	137314445	early B cell factor 3 [Source:MGI Symbol;Acc:MGI:894289]	protein_coding	5.77137	10.8811	4.42109	0.97635	0.800596	1.30445	0.44845	0.257702	0.161014	4.03421	4.40941	4.06122	-0.00317406	0.00560527	0.249059	0.19226	0.516557	1.10444
ENSMUSG00000010492	Uckl1os	2	+	181578480	181585170	uridine-cytidine kinase 1-like 1, opposite strand [Source:MGI Symbol;Acc:MGI:3801877]	antisense	1.04881	1.47344	3.09139	0.547279	0.706729	0.471576	-0.168758	1.25653	0.912194	1.88954	3.18658	3.44951	0.278732	-0.0471805	-0.00902454	-0.205693	0.536666	-0.0918657
ENSMUSG00000010505	Myt1	2	+	181763332	181827797	myelin transcription factor 1 [Source:MGI Symbol;Acc:MGI:1100535]	protein_coding	4.43752	0.783793	2.03102	0.710139	0.67242	0.961066	0.639271	1.22827	0.263878	2.5351	6.36752	5.51316	-0.00238408	0.00596145	-0.00355051	0.446378	0.528004	1.1517
ENSMUSG00000010517	Faf1	4	+	109676588	109963960	Fas-associated factor 1 [Source:MGI Symbol;Acc:MGI:109419]	protein_coding	11.0708	1.61497	4.22756	0.710114	5.42621	1.40112	2.22924	3.15589	1.39904	8.01964	4.27364	4.20113	8.15864	3.25147	8.23086	1.14349	0.994983	0.703934
ENSMUSG00000010529	Gm266	12	-	111484609	111485823	predicted gene 266 [Source:MGI Symbol;Acc:MGI:2685112]	protein_coding	0.106362	2.45719	-0.0364667	0.34532	0.0942349	0.841954	0.167274	-0.223563	0.323122	1.81556	2.64961	3.23134	0.00784668	1.16731	-0.00268493	-0.308573	0.179038	0.226664
ENSMUSG00000010538	Tsacc	3	-	88282757	88296999	TSSK6 activating co-chaperone [Source:MGI Symbol;Acc:MGI:1924177]	protein_coding	0.584733	-0.0459674	1.93105	0.802572	3.45741	1.27069	0.103828	0.19481	1.40318	3.72409	5.86643	3.01609	0.112057	23.3507	0.0414957	3.12123	0.687126	0.163748
ENSMUSG00000010554	Mettl16	11	+	74770830	74828525	methyltransferase like 16 [Source:MGI Symbol;Acc:MGI:1914743]	protein_coding	7.7203	3.52364	4.31708	0.652825	1.75707	1.66164	1.10219	2.09542	0.96161	9.13204	9.29693	6.43759	2.50927	3.7007	0.528992	2.38386	0.649311	2.45075
ENSMUSG00000010592	Dazl	17	-	50279395	50293636	deleted in azoospermia-like [Source:MGI Symbol;Acc:MGI:1342328]	protein_coding	5.81927	1.83368	1.60321	0.448304	8.15205	1.1124	0.185153	0.340066	0.37199	3.58879	1.39096	3.15553	0.163021	-0.0129675	0.0708339	4.509	0.672141	7.97214
ENSMUSG00000010601	Apol7a	15	-	77388219	77399110	apolipoprotein L 7a [Source:MGI Symbol;Acc:MGI:1923011]	protein_coding	0.767383	8.80726	4.74421	0.635617	0.151457	1.85607	0.0768465	0.193064	1.10397	3.28219	6.24451	4.38625	0.0462779	-0.0356655	-0.0088822	0.128562	0.721104	0.253543
ENSMUSG00000010607	Pigyl	9	+	22156846	22158358	phosphatidylinositol glycan anchor biosynthesis, class Y-like [Source:MGI Symbol;Acc:MGI:1913518]	protein_coding	0.267088	0.0863546	5.62462	0.660507	7.06178	3.97208	63.8778	5.23539	559.236	86.9139	2.5988	3.11176	108.684	87.5262	42.6362	15.0567	0.799216	-0.109975
ENSMUSG00000010608	Rbm25	12	+	83631236	83683123	RNA binding motif protein 25 [Source:MGI Symbol;Acc:MGI:1914289]	protein_coding	49.3879	22.704	27.1099	300.914	412.127	27.5441	52.1895	25.5339	163.679	39.9179	16.2552	33.0608	96.27	31.0135	57.2753	75.9727	4.16555	26.5187
ENSMUSG00000010609	Psen2	1	-	180227004	180263438	presenilin 2 [Source:MGI Symbol;Acc:MGI:109284]	protein_coding	6.1017	21.0117	4.17321	48.9311	6.73345	6.87686	2.95628	7.29593	0.738611	25.0637	10.0217	23.286	4.76356	3.01754	9.26445	17.118	0.994293	13.8481
ENSMUSG00000010651	Acaa1b	9	-	119148023	119157093	acetyl-Coenzyme A acyltransferase 1B [Source:MGI Symbol;Acc:MGI:3605455]	protein_coding	0.77825	0.171573	-0.520004	0.78287	-0.0793401	2.09405	2.79559	2.05574	0.47431	10.7047	2.03841	3.51266	1.02775	-0.0404333	0.158724	0.366747	0.293064	4.49361
ENSMUSG00000010660	Plcd1	9	-	119071527	119093502	phospholipase C, delta 1 [Source:MGI Symbol;Acc:MGI:97614]	protein_coding	0.435497	2.53426	0.836062	0.715902	0.471934	1.99473	0.00251001	-0.218085	0.569214	1.90554	1.98669	2.37749	0.029254	-0.0234978	-0.00504323	-0.207196	0.287199	0.145434
ENSMUSG00000010663	Fads1	19	+	10182888	10196877	fatty acid desaturase 1 [Source:MGI Symbol;Acc:MGI:1923517]	protein_coding	1.38847	0.956684	4.24506	1.95139	2.45007	0.920795	0.0341199	0.33744	2.68911	5.24086	10.2717	4.41676	0.298843	4.78542	4.05268	2.17348	3.50914	0.070753
ENSMUSG00000010721	Lmbr1	5	-	29229802	29378390	limb region 1 [Source:MGI Symbol;Acc:MGI:1861746]	protein_coding	1.21383	8.87323	1.88728	1.04921	0.559956	1.27444	0.392003	0.30445	0.506621	3.15201	2.56543	2.44869	0.068475	0.455748	0.0465489	0.104041	0.721069	0.584835
ENSMUSG00000010751	Tnfrsf22	7	-	143634806	143649661	tumor necrosis factor receptor superfamily, member 22 [Source:MGI Symbol;Acc:MGI:1930270]	protein_coding	15.4725	3.86027	8.832	0.331289	0.9393	1.22477	0.580578	0.44629	0.106762	3.21451	1.55262	4.08827	0.00701831	0.727396	0.000122787	2.44587	0.268666	0.532614
ENSMUSG00000010755	Cars	7	-	143557230	143600090	cysteinyl-tRNA synthetase [Source:MGI Symbol;Acc:MGI:1351477]	protein_coding	3.19502	1.67728	12.2979	7.84154	8.12341	2.76761	0.216925	1.64931	2.25897	7.11442	9.54558	8.19746	0.885075	5.23519	6.77495	3.31469	3.8723	0.202129
ENSMUSG00000010760	Phlda2	7	-	143501545	143503150	pleckstrin homology like domain, family A, member 2 [Source:MGI Symbol;Acc:MGI:1202307]	protein_coding	0.356551	0.0218311	0.455345	0.388803	4.23515	1.37123	-0.0633879	-0.194746	0.817157	4.05367	1.14835	1.03876	0.0246818	-0.0202184	-0.00394868	-0.115114	0.209493	-0.0656499
ENSMUSG00000010796	Asz1	6	-	18050964	18109061	ankyrin repeat, SAM and basic leucine zipper domain containing 1 [Source:MGI Symbol;Acc:MGI:1921318]	protein_coding	0.0672146	1.09948	0.0534425	0.444109	1.85982	0.360563	0.33381	0.87138	0.450813	1.97752	3.83462	1.69848	0.0813685	-0.00154319	-0.00319693	0.498882	0.239413	0.453351
ENSMUSG00000010797	Wnt2	6	-	17988940	18030585	wingless-type MMTV integration site family, member 2 [Source:MGI Symbol;Acc:MGI:98954]	protein_coding	0.615123	1.79221	2.79769	0.495357	0.199281	0.143796	0.31283	-0.0652019	0.700439	2.11878	2.36164	1.69415	0.032373	-0.0238488	0.0354242	2.72656	0.544878	0.373736
ENSMUSG00000010803	Gabra1	11	-	42130939	42182930	gamma-aminobutyric acid (GABA) A receptor, subunit alpha 1 [Source:MGI Symbol;Acc:MGI:95613]	protein_coding	2.98384	1.31544	1.99846	0.445686	0.228873	0.293009	0.652383	-0.471295	0.3188	4.03471	2.86623	2.05359	-0.00697849	0.00964822	-0.00259565	2.02267	0.243822	1.12091
ENSMUSG00000010825	Grid2ip	5	+	143357338	143392152	glutamate receptor, ionotropic, delta 2 (Grid2) interacting protein 1 [Source:MGI Symbol;Acc:MGI:2176213]	protein_coding	4.85382	0.295583	1.16162	1.37473	0.721891	1.86127	0.754868	1.40598	0.178439	7.41231	3.10204	4.18051	-0.00938014	0.0118972	0.0173827	0.472154	0.481842	1.3174
ENSMUSG00000010830	Kdelr3	15	+	79516411	79527739	KDEL (Lys-Asp-Glu-Leu) endoplasmic reticulum protein retention receptor 3 [Source:MGI Symbol;Acc:MGI:2145953]	protein_coding	1.09857	0.0118082	2.42418	0.541542	0.119197	0.107334	-0.0564064	1.85024	1.08694	1.35022	4.32801	3.95038	1.2143	0.462846	0.0880456	-0.384669	1.9744	-0.0344188
ENSMUSG00000010841	Cfap97d1	11	+	101984279	101992264	CFAP97 domain containing 1 [Source:MGI Symbol;Acc:MGI:1922687]	protein_coding	0.131583	-0.0565093	-0.063353	0.181636	0.0912461	1.38355	0.149698	-0.285356	0.217101	2.80299	3.13638	4.93587	0.00968039	-0.00671089	0.747962	-0.301484	0.188633	0.204414
ENSMUSG00000010911	Apip	2	+	103073675	103092644	APAF1 interacting protein [Source:MGI Symbol;Acc:MGI:1926788]	protein_coding	2.51209	10.463	5.69238	1.75206	8.95314	145.951	-0.193848	-0.09414	2.2834	5.05786	2.49514	1.69875	0.105568	22.0527	27.163	-0.453864	1.25875	-0.189353
ENSMUSG00000010914	Pdhx	2	-	103021075	103073513	pyruvate dehydrogenase complex, component X [Source:MGI Symbol;Acc:MGI:1351627]	protein_coding	5.39158	-0.0656084	2.93168	0.747457	4.37936	1.19047	0.259467	2.49516	1.55611	3.6008	3.95431	3.82283	4.77816	17.3379	5.40757	0.158789	1.06537	0.459857
ENSMUSG00000010936	Vac14	8	+	110618585	110720398	Vac14 homolog (S. cerevisiae) [Source:MGI Symbol;Acc:MGI:2157980]	protein_coding	1.01929	4.60804	1.23338	0.909467	2.98259	2.41672	-0.126722	1.35931	0.967228	17.427	3.39891	3.57031	5.05253	3.58085	0.893178	2.17867	1.41858	4.70414
ENSMUSG00000011008	Mcoln2	3	+	146149833	146195513	mucolipin 2 [Source:MGI Symbol;Acc:MGI:1915529]	protein_coding	-0.312044	4.94588	4.45996	0.265754	0.839817	3.63814	0.871925	1.61969	111.96	1.86845	2.83926	2.73736	-0.030129	18.1406	0.00129519	1.08728	0.452931	1.45568
ENSMUSG00000011034	Slc5a1	5	+	33104219	33162870	solute carrier family 5 (sodium/glucose cotransporter), member 1 [Source:MGI Symbol;Acc:MGI:107678]	protein_coding	2.7235	0.646709	1.88561	0.65733	1.26036	1.12101	0.258979	0.340315	0.217021	3.44077	2.70167	1.64896	0.0146861	-0.00111449	-0.00253	0.114356	0.359968	0.439956
ENSMUSG00000011096	Akt1s1	7	+	44848991	44855421	AKT1 substrate 1 (proline-rich) [Source:MGI Symbol;Acc:MGI:1914855]	protein_coding	11.8873	0.479494	2.05135	0.971489	4.69786	4.65318	5.53588	1.68257	1.05354	4.63582	6.65038	5.81467	7.48973	6.47084	3.94769	-0.123249	0.672057	0.552023
ENSMUSG00000011114	Tbrg1	9	-	37648763	37657312	transforming growth factor beta regulated gene 1 [Source:MGI Symbol;Acc:MGI:1100877]	protein_coding	7.07072	6.3294	2.99435	62.963	17.0214	2.99207	82.8869	213.355	6.46404	18.5334	8.06498	9.69796	8.14845	16.8787	13.2046	11.3842	13.8134	6.33359
ENSMUSG00000011118	Panx3	9	-	37659902	37669235	pannexin 3 [Source:MGI Symbol;Acc:MGI:1918881]	protein_coding	9.02729	1.36512	4.75461	0.0870163	0.270579	2.11945	0.356425	-0.241464	0.219092	2.68482	3.09697	3.46852	-0.0141998	0.0142354	0.12338	-0.250705	0.0468299	0.466266
ENSMUSG00000011148	Adssl1	12	+	112620045	112641360	adenylosuccinate synthetase like 1 [Source:MGI Symbol;Acc:MGI:87947]	protein_coding	4.58586	3.10149	1.63714	0.48254	3.29689	3.1782	-0.580406	2.13486	2.73935	20.9514	15.7201	5.33376	37.9151	21.6174	25.9708	0.942314	2.76282	23.9948
ENSMUSG00000011154	Cfap161	7	-	83774101	83794880	cilia and flagella associated protein 161 [Source:MGI Symbol;Acc:MGI:1922806]	protein_coding	1.42284	3.69325	1.56222	0.629796	0.506827	0.611409	0.235937	0.413658	0.237952	2.89182	1.13628	2.34914	0.00810689	-0.00486418	-0.00319305	0.121782	0.222471	0.42186
ENSMUSG00000011158	Brf1	12	-	112960085	113000704	BRF1, RNA polymerase III transcription initiation factor 90 kDa subunit [Source:MGI Symbol;Acc:MGI:1919558]	protein_coding	0.897499	4.67504	18.481	24.3124	5.61192	9.54571	0.634803	5.30916	32.2692	6.13682	8.19461	24.9147	8.18714	22.473	14.5966	6.76245	0.401007	1.01086
ENSMUSG00000011171	Vipr2	12	+	116077726	116146261	vasoactive intestinal peptide receptor 2 [Source:MGI Symbol;Acc:MGI:107166]	protein_coding	0.279641	-0.0738495	0.653968	0.54659	0.649281	0.704035	0.198084	0.0353839	0.607092	4.86601	3.2302	3.35722	0.0624927	-0.0142374	-0.00501114	0.86669	0.392063	0.278362
ENSMUSG00000011179	Odc1	12	+	17544794	17551505	ornithine decarboxylase, structural 1 [Source:MGI Symbol;Acc:MGI:97402]	protein_coding	25.5795	17.1103	44.0593	77.232	15.8714	37.5908	30.2817	2.65857	1.74436	9.61114	20.2334	16.7349	40.3088	28.8372	4.27222	7.54547	4.85951	-0.437676
ENSMUSG00000011254	Thg1l	11	-	45946843	45955494	tRNA-histidine guanylyltransferase 1-like (S. cerevisiae) [Source:MGI Symbol;Acc:MGI:1913878]	protein_coding	0.881162	3.88441	0.583785	0.594091	1.70625	1.64087	18.7329	0.063749	0.861478	1.71232	1.67321	4.24539	0.270622	0.556634	0.425835	4.40306	1.017	0.00244578
ENSMUSG00000011256	Adam19	11	+	46055992	46147343	a disintegrin and metallopeptidase domain 19 (meltrin beta) [Source:MGI Symbol;Acc:MGI:105377]	protein_coding	4.06475	6.3339	1.81927	0.675936	0.644143	2.27563	13.2873	0.549636	1.20374	3.34202	2.6584	2.58045	17.8209	4.93886	2.77399	1.37652	0.576243	0.058006
ENSMUSG00000011257	Pabpc4	4	+	123262351	123298925	poly(A) binding protein, cytoplasmic 4 [Source:MGI Symbol;Acc:MGI:2385206]	protein_coding	45.422	1.80487	0.661211	87.2997	4.76109	3.69557	25.7885	19.6964	1.73918	5.28245	5.57654	7.87298	17.8765	30.1327	21.1537	5.37459	1.07124	37.539
ENSMUSG00000011263	Exoc3l2	7	+	19463331	19496762	exocyst complex component 3-like 2 [Source:MGI Symbol;Acc:MGI:1921713]	protein_coding	0.522742	0.892073	-0.0179726	0.90404	0.215691	0.582093	-0.0244251	0.721983	0.518704	1.5316	1.97919	3.45293	0.118119	-0.0272447	-0.00589425	1.44507	0.355084	5.22514
ENSMUSG00000011267	Zfp296	7	+	19577287	19580656	zinc finger protein 296 [Source:MGI Symbol;Acc:MGI:1926956]	protein_coding	1.435	4.88317	-0.593505	0.451006	2.21043	1.57206	-0.212817	2.51366	1.03725	3.25417	3.23969	6.25753	1.40437	4.88962	3.56448	0.406751	0.652537	52.4397
ENSMUSG00000011305	Plin5	17	-	56111601	56117596	perilipin 5 [Source:MGI Symbol;Acc:MGI:1914218]	protein_coding	0.25702	0.494718	0.229326	0.711863	0.122677	0.324295	0.316916	1.21113	0.545621	2.28352	2.97202	3.08908	0.0181395	-0.0133003	-0.0045769	-0.379995	0.299819	0.251713
ENSMUSG00000011306	Sugp1	8	+	70042813	70072347	SURP and G patch domain containing 1 [Source:MGI Symbol;Acc:MGI:1917866]	protein_coding	18.7362	4.60557	5.72903	4.81075	5.04118	3.49181	1.07229	3.12277	1.13839	6.66779	5.52514	9.08664	0.516616	12.3702	7.05686	1.45083	1.00128	2.87971
ENSMUSG00000011349	Dmrtc2	7	+	24870057	24877651	doublesex and mab-3 related transcription factor like family C2 [Source:MGI Symbol;Acc:MGI:1918491]	protein_coding	0.0404626	-0.0568272	0.0190189	0.402272	0.0761984	1.25263	0.154436	-0.129245	0.118436	2.1635	1.13997	3.14676	0.183135	-0.00123914	-0.00170099	-0.2586	0.118984	0.205379
ENSMUSG00000011350	Gm5893	7	+	24818795	24840275	predicted gene 5893 [Source:MGI Symbol;Acc:MGI:3645761]	processed_transcript	4.159	-0.100693	0.54611	0.0734493	0.0671137	0.71421	0.318098	0.182936	-0.183976	2.80195	2.46791	3.008	-0.0263113	0.024281	0.00267631	-0.221459	0.147592	0.401485
ENSMUSG00000011382	Dhdh	7	-	45470987	45488805	dihydrodiol dehydrogenase (dimeric) [Source:MGI Symbol;Acc:MGI:1919005]	protein_coding	8.86976	6.52082	4.56487	0.619488	0.629268	1.53898	0.970642	0.097112	0.426117	3.91632	2.63946	3.06559	10.4391	2.88429	4.22362	2.98111	0.823186	1.64298
ENSMUSG00000011427	Zfp790	7	+	29816114	29831005	zinc finger protein 790 [Source:MGI Symbol;Acc:MGI:1923431]	protein_coding	0.366718	-0.0248963	1.79311	0.710972	0.470702	0.826197	0.190874	-0.0310962	1.71276	2.39318	3.16555	3.58433	0.0251124	1.27419	-0.00495805	0.668028	0.656888	0.117357
ENSMUSG00000011463	Cpb1	3	-	20248264	20275733	carboxypeptidase B1 (tissue) [Source:MGI Symbol;Acc:MGI:1923953]	protein_coding	6.63221	-0.170362	1.23915	0.729739	0.210443	1.63731	0.597471	0.132691	0.209265	4.41717	1.97673	3.64973	-0.0109123	0.0128222	1.37161	0.685025	0.189584	0.813858
ENSMUSG00000011486	Slc25a41	17	-	57032773	57041654	solute carrier family 25, member 41 [Source:MGI Symbol;Acc:MGI:2144215]	protein_coding	0.181202	0.02284	0.126893	0.0680201	0.59532	1.27566	-0.0606168	-0.0752912	0.151204	1.46221	2.22137	2.76989	0.0134451	-0.0113391	-0.00194975	-0.0167925	0.721463	-0.0690093
ENSMUSG00000011589	Fsd1	17	+	55986509	55996881	fibronectin type 3 and SPRY domain-containing protein [Source:MGI Symbol;Acc:MGI:1934858]	protein_coding	0.318704	-0.104906	-0.152804	1.03999	0.189291	2.35596	0.302357	1.62213	0.515805	2.1974	3.98468	4.41652	0.0817515	-0.0153967	-0.0060972	-0.510098	0.43197	0.425466
ENSMUSG00000011632	Pinlyp	7	-	24541658	24546118	phospholipase A2 inhibitor and LY6/PLAUR domain containing [Source:MGI Symbol;Acc:MGI:3615324]	protein_coding	-0.00849083	-0.0749103	0.0902332	0.357096	0.0912363	0.875962	0.21352	-0.0730621	0.0908085	1.76396	2.59663	5.05728	-0.000970017	0.00235935	-0.00138512	-0.29782	0.110893	0.281973
ENSMUSG00000011658	Fuz	7	+	44896079	44902631	fuzzy planar cell polarity protein [Source:MGI Symbol;Acc:MGI:1917550]	protein_coding	0.463937	-0.0408569	0.657666	0.431916	0.7064	0.892623	0.0926695	0.890216	0.54785	3.44162	4.13165	2.56184	0.0306778	-0.0236564	1.07755	-0.089157	0.575751	0.143783
ENSMUSG00000011751	Sptbn4	7	-	27356383	27447686	spectrin beta, non-erythrocytic 4 [Source:MGI Symbol;Acc:MGI:1890574]	protein_coding	0.432615	-0.0701996	0.593233	0.6515	0.407653	1.2026	0.223077	1.28371	1.75272	2.34114	2.75952	1.86836	0.0287835	-0.0215734	-0.00654604	-0.0914948	0.61801	0.375699
ENSMUSG00000011752	Pgam1	19	+	41911923	41918660	phosphoglycerate mutase 1 [Source:MGI Symbol;Acc:MGI:97552]	protein_coding	5.05604	12.8903	7.21601	5.85017	5.29357	1.03788	27.3817	82.2654	5.20358	6.4798	17.0943	5.88245	20.494	28.2822	21.6097	3.42807	10.7806	0.355232
ENSMUSG00000011831	Evi5	5	-	107744795	107875107	ecotropic viral integration site 5 [Source:MGI Symbol;Acc:MGI:104736]	protein_coding	21.5153	2.18641	6.1972	2.24904	4.40361	4.2827	19.3734	6.83444	1.93472	13.2891	8.16636	6.97848	6.63364	2.35319	3.24186	2.40345	3.24234	0.784316
ENSMUSG00000011832	Evi5l	8	+	4166567	4211257	ecotropic viral integration site 5 like [Source:MGI Symbol;Acc:MGI:2442167]	protein_coding	0.562687	6.52414	3.53123	1.03578	1.21647	1.6378	0.106502	0.535422	1.07712	4.36912	4.46857	2.60434	0.163349	2.42876	0.0830336	0.359677	1.32806	0.337527
ENSMUSG00000011837	Snapc2	8	+	4253080	4256220	small nuclear RNA activating complex, polypeptide 2 [Source:MGI Symbol;Acc:MGI:1914861]	protein_coding	1.09572	0.00837362	1.83179	0.698792	5.25479	1.44242	-0.0483614	1.20699	1.4913	6.91923	2.88693	4.00721	0.0607692	10.1898	-0.0103989	1.37949	0.689608	-0.0238908
ENSMUSG00000011877	Git1	11	+	77493562	77507786	GIT ArfGAP 1 [Source:MGI Symbol;Acc:MGI:1927140]	protein_coding	3.34799	0.0623616	3.56265	1.18442	1.1297	1.13206	0.369207	1.49653	1.0157	4.88879	7.85358	4.69281	0.487001	1.77217	3.69418	0.467091	1.78609	-0.10468
ENSMUSG00000011884	Gltp	5	-	114669398	114690984	glycolipid transfer protein [Source:MGI Symbol;Acc:MGI:1929253]	protein_coding	57.1939	21.389	6.76766	56.2292	234.216	275.403	0.238246	17.0619	3.01531	60.8056	418.494	23.985	41.11	49.5645	111.051	13.7154	3.68605	110.03
ENSMUSG00000011958	Bnip2	9	+	69989466	70008317	BCL2/adenovirus E1B interacting protein 2 [Source:MGI Symbol;Acc:MGI:109327]	protein_coding	5.24924	128.468	4.81642	369.211	6.18527	12.5204	22.8762	5.13979	1.67541	4.55054	243.895	9.20246	91.7503	83.4785	88.9413	5.51602	3.77426	6.97826
ENSMUSG00000011960	Ccnt1	15	-	98538689	98570923	cyclin T1 [Source:MGI Symbol;Acc:MGI:1328363]	protein_coding	13.6472	10.0041	8.27929	4.52219	5.45486	1.99118	6.88473	1.78065	1.60261	3.92286	5.10249	11.343	7.55321	3.58318	16.3872	1.4521	12.6607	3.02431
ENSMUSG00000012017	Scarf2	16	+	17797282	17808293	scavenger receptor class F, member 2 [Source:MGI Symbol;Acc:MGI:1858430]	protein_coding	0.777269	0.040774	0.361508	0.780192	0.54381	0.48448	-0.114502	0.463556	0.882022	2.39938	3.18932	2.5526	0.0470512	-0.03777	-0.00744819	1.21901	0.433011	5.35679
ENSMUSG00000012042	4930579F01Rik	3	-	138164078	138239663	RIKEN cDNA 4930579F01 gene [Source:MGI Symbol;Acc:MGI:1914991]	protein_coding	0.104218	-0.0630916	-0.0333976	0.830181	0.0954224	0.52503	0.170961	0.756275	0.197566	2.22343	2.58524	2.68724	0.00768625	-0.00495977	-0.00268115	-0.311553	0.216293	0.231521
[truncated: 40,673 more rows]
